# Supplementary material for: Phosphoproteomics reveals network rewiring to a pro-adhesion state in annexin-1-deficient mammary epithelial cells
Source: Springer Nature journal article supplement (doi:10.1186/s13058-017-0924-4), 2017-12-01

## Additional file 5: Figure S3

**A**

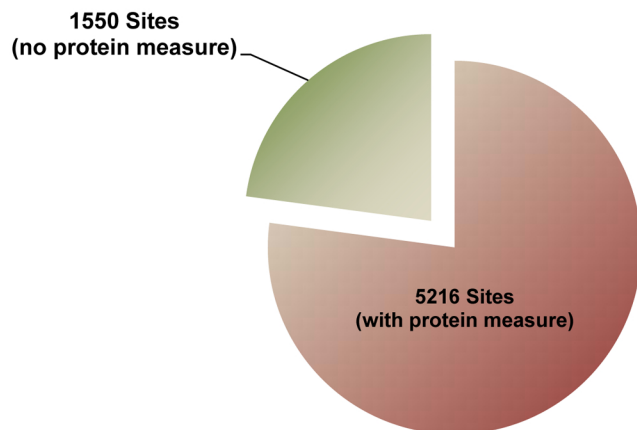

**B**

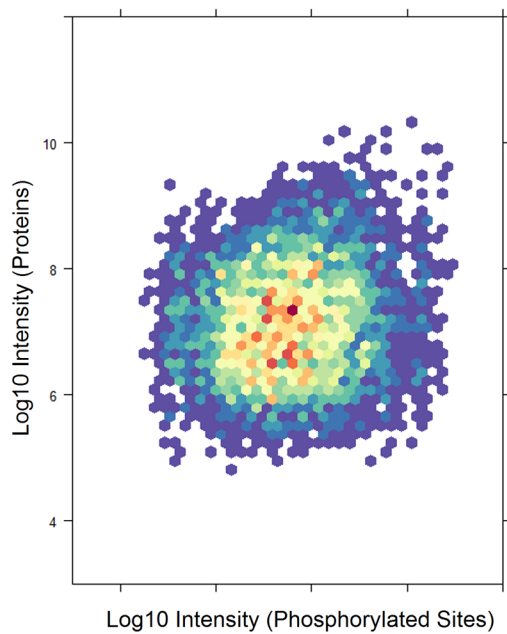

Supplement: MOESM5 [file 15301698]
