# Supplementary material for: Phosphoproteomics reveals network rewiring to a pro-adhesion state in annexin-1-deficient mammary epithelial cells
Source: Springer Nature journal article supplement (doi:10.1186/s13058-017-0924-4), 2017-12-01

Additional file 13: Figure S5

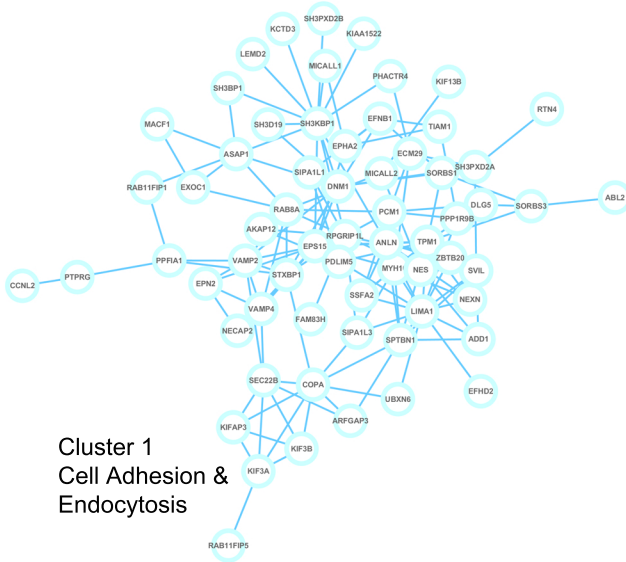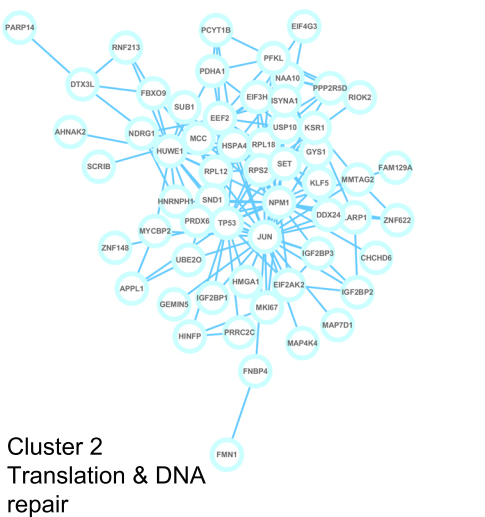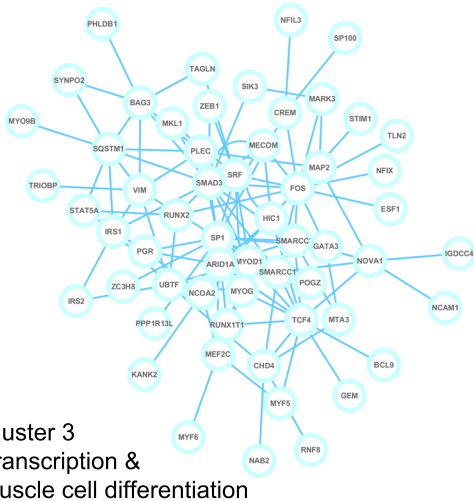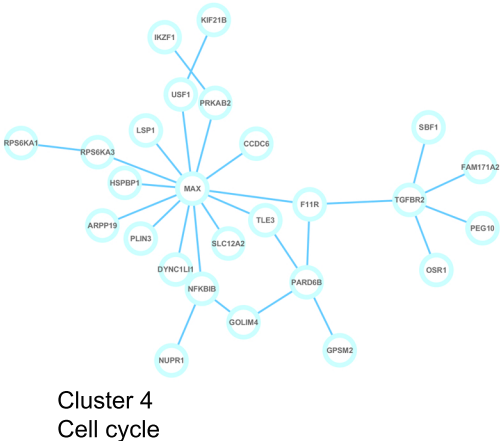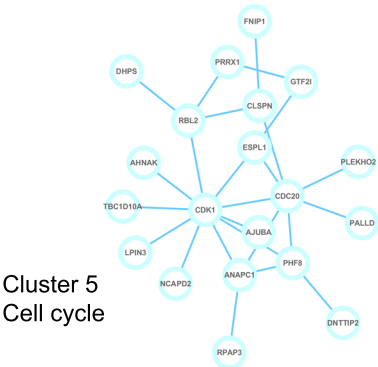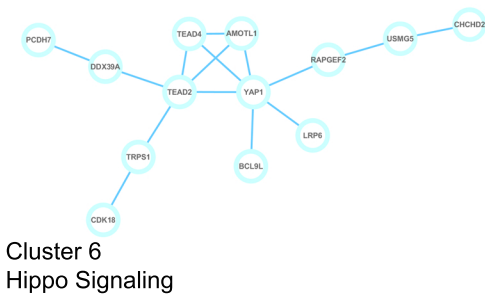

Supplement: MOESM13 [file 15301698]
