# Supplementary material for: Phosphoproteomics reveals network rewiring to a pro-adhesion state in annexin-1-deficient mammary epithelial cells
Source: Breast Cancer Res. 2017 Dec 12;19:132. doi: 10.1186/s13058-017-0924-4 (PMC5727667; doi:10.1186/s13058-017-0924-4)
Supplement: Supplementary file 1 — List of all identified phosphorylation sites in mammary epithelial cells from ANXA1-heterozygous and ANXA1-deficient mice. (XLSX 10173 kb) [file 13058_2017_924_MOESM1_ESM.xlsx]

## Sheet: Phospho (STY)Sites
Table S1: List of all identified phosphorylation sites in mammary epithelial cells from ANXA1-heterozygous and ANXA1-deficient mice
Proteins	Positions within proteins	Leading proteins	Protein	Protein names	Gene names	Fasta headers	Localization prob	Score diff	Localization prob Fwd1	Score diff Fwd1	PEP Fwd1	Score Fwd1	Localization prob Fwd2	Score diff Fwd2	PEP Fwd2	Score Fwd2	Localization prob Rev1	Score diff Rev1	PEP Rev1	Score Rev1	Localization prob Rev2	Score diff Rev2	PEP Rev2	Score Rev2	Diagnostic peak	Number of Phospho (STY)	Amino acid	Sequence window	Modification window	Peptide window coverage	PEP	Score	Score for localization	Modified sequence	Phospho (STY) Probabilities	Phospho (STY) Score diffs	Position in peptide	Charge	m/z	Mass error [ppm]	Ratio H/L	Ratio H/L___1	Ratio H/L___2	Ratio H/L___3	Ratio H/L normalized	Ratio H/L normalized___1	Ratio H/L normalized___2	Ratio H/L normalized___3	Ratio H/L unmod. pep.
A0JNY3;Q8BUV3	341;338	A0JNY3	A0JNY3	Gephyrin;Molybdopterin adenylyltransferase;Molybdopterin molybdenumtransferase	Gphn;Gphn	>tr|A0JNY3|A0JNY3_MOUSE Gephyrin OS=Mus musculus GN=Gphn PE=2 SV=1;>sp|Q8BUV3|GEPH_MOUSE Gephyrin OS=Mus musculus GN=Gphn PE=1 SV=2	0.999807	37.1496					0.999593	34.0141	0.0145402	100.38					0.999807	37.1496	0.00204121	92.19		1	S	QSRCSSKENILRASHSAVDITKVARRHRMSP	X;X;X;X;X;X;X;X;X;X;X;X;X;X;X;Phospho (STY);X;X;X;X;X;X;X;X;X;X;X;X;X;X;X	XXXXXXXXXXXXPPPPPPPPPPXXXXXXXXX	0.00204121	100.38	92.19	_ASHS(ph)AVDITK_	ASHS(1)AVDITK	AS(-37.15)HS(37.15)AVDIT(-65.22)K	4	2	554.755	0.52957	0.79334	0.79334	NaN	NaN	0.81796	0.81796	NaN	NaN	1.8257
A1A5B6;E9PWX7	560;541	A1A5B6	A1A5B6	TBC1 domain family member 25	Tbc1d25;Tbc1d25	>sp|A1A5B6|TBC25_MOUSE TBC1 domain family member 25 OS=Mus musculus GN=Tbc1d25 PE=1 SV=1;>tr|E9PWX7|E9PWX7_MOUSE TBC1 domain family member 25 OS=Mus musculus GN=Tbc1d25 PE=4 SV=1	1	91.0762	1	146.586	5.42976e-10	188.13	1	166.864	1.30348e-15	201.06	1	173.254	4.74872e-06	174.24	1	91.0762	0.00015637	165.49		1	S	SSQGPSGGGRLLRQASLDGLQQLRDNMGLRK	X;X;X;X;X;X;X;X;X;X;X;X;X;X;X;Phospho (STY);X;X;X;X;X;X;X;X;X;X;X;X;X;X;X	XXXXXXXXXXXXXPPPPPPPPPPPXXXXXXX	1.30348e-15	201.06	91.076	_QAS(ph)LDGLQQLR_	QAS(1)LDGLQQLR	QAS(91.08)LDGLQQLR	3	2	654.819	-1.3046	0.92978	0.92978	NaN	NaN	1.1583	1.1583	NaN	NaN	NaN
A1BN54;D3Z0L8;D3Z761;O88990;P57780;E9Q2W9;Q7TPR4;Q9JI91	140;75;75;153;160;160;140;147	A1BN54;D3Z0L8;O88990;P57780;Q7TPR4;Q9JI91	P57780	Alpha-actinin-3;Alpha-actinin-4;Alpha-actinin-1;Alpha-actinin-2	Actn1;Actn4;Actn4;Actn3;Actn4;Actn4;Actn1;Actn2	>tr|A1BN54|A1BN54_MOUSE Alpha actinin 1a OS=Mus musculus GN=Actn1 PE=2 SV=1;>tr|D3Z0L8|D3Z0L8_MOUSE Alpha-actinin-4 (Fragment) OS=Mus musculus GN=Actn4 PE=4 SV=1;>tr|D3Z761|D3Z761_MOUSE Alpha-actinin-4 (Fragment) OS=Mus musculus GN=Actn4 PE=4 SV=1;>sp|O889	1	64.2656	0.999994	52.8803	0.000287521	106.93	0.999997	54.9087	1.08415e-14	169.43	0.999782	36.9192	1.24801e-10	145.69	1	64.2656	4.3804e-16	177.6		1	S	GMIWTIILRFAIQDISVEETSAKEGLLLWCQ	X;Oxidation (M);X;X;X;X;X;X;X;X;X;X;X;X;X;Phospho (STY);X;X;X;X;X;X;X;X;X;X;X;X;X;X;X	XXXXXXXXXPPPPPPPPPPPPPPXXXXXXXX	4.3804e-16	177.6	177.6	_FAIQDIS(ph)VEETSAK_	FAIQDIS(1)VEETSAK	FAIQDIS(64.27)VEET(-64.27)S(-79.02)AK	7	2	809.374	-0.32349	0.88197	0.88197	NaN	NaN	0.916	0.916	NaN	NaN	0.99677
Q61214;A1L341	538;529	Q61214	Q61214	Dual specificity tyrosine-phosphorylation-regulated kinase 1A	Dyrk1a;Dyrk1a	>sp|Q61214|DYR1A_MOUSE Dual specificity tyrosine-phosphorylation-regulated kinase 1A OS=Mus musculus GN=Dyrk1a PE=1 SV=1;>tr|A1L341|A1L341_MOUSE Dual-specificity tyrosine-(Y)-phosphorylation regulated kinase 1a OS=Mus musculus GN=Dyrk1a PE=2 SV=1	1	99.2788					1	99.2788	1.53735e-20	137.45					0.999593	36.9132	0.0289886	37.112		1	S	NSGRARSDPTHQHRHSGGHFAAAVQAMDCET	X;X;X;X;X;X;Phospho (STY);X;X;X;X;X;X;X;X;Phospho (STY);X;X;X;X;X;X;X;X;X;X;Oxidation (M);X;X;X;X	XXXXXXXXXXXXXXPPPPPPPPPPPPPPPPP	1.53735e-20	137.45	103.87	_HS(ph)GGHFAAAVQAMDCETHSPQVR_	HS(1)GGHFAAAVQAMDCETHSPQVR	HS(99.28)GGHFAAAVQAMDCET(-99.28)HS(-99.28)PQVR	2	4	644.026	-0.27965	0.66526	0.66526	NaN	NaN	0.80934	0.80934	NaN	NaN	NaN
A1L3P4;B0QZV3	658;626	A1L3P4	A1L3P4	Sodium/hydrogen exchanger;Sodium/hydrogen exchanger	Slc9a6;Slc9a6	>tr|A1L3P4|A1L3P4_MOUSE Sodium/hydrogen exchanger OS=Mus musculus GN=Slc9a6 PE=2 SV=1;>tr|B0QZV3|B0QZV3_MOUSE Sodium/hydrogen exchanger OS=Mus musculus GN=Slc9a6 PE=3 SV=1	0.831409	6.92979													0.831409	6.92979	0.000640319	88.561		1	S	ESATASAPRRFMGNSSEDALDRELTFGDHEL	X;X;X;X;X;X;X;X;X;X;X;X;X;X;X;Phospho (STY);X;X;X;X;X;X;X;X;X;X;X;X;X;X;X	XXXXXXXXXXPPPPPPPPPPPPXXXXXXXXX	0.000640319	88.561	88.561	_FMGNSS(ph)EDALDR_	FMGNS(0.169)S(0.831)EDALDR	FMGNS(-6.93)S(6.93)EDALDR	6	2	711.274	-0.090072	1.3946	1.3946	NaN	NaN	1.3758	1.3758	NaN	NaN	NaN
Q05BA5;A2A468;O09000	846;846;847	Q05BA5	Q05BA5	Nuclear receptor coactivator 3	Ncoa3;Ncoa3;Ncoa3	>tr|Q05BA5|Q05BA5_MOUSE Nuclear receptor coactivator 3 OS=Mus musculus GN=Ncoa3 PE=2 SV=1;>tr|A2A468|A2A468_MOUSE Nuclear receptor coactivator 3 OS=Mus musculus GN=Ncoa3 PE=4 SV=1;>sp|O09000|NCOA3_MOUSE Nuclear receptor coactivator 3 OS=Mus musculus GN=Nco	1	73.166	0.999992	52.2572	4.20788e-17	154.48	0.999997	55.9801	1.10864e-62	217.35	0.999998	57.8975	8.22415e-46	193.19	1	73.166	1.41416e-62	216.17		1	S	PQPVQSVRPPYNRAVSLDSPVSVGSGPPVKN	X;X;X;X;X;X;X;X;X;X;X;X;X;X;X;Phospho (STY);X;X;X;X;X;X;X;X;X;X;X;X;X;X;X	XXXXXXXXXXXXXPPPPPPPPPPPPPPPPPX	1.10864e-62	217.35	209.66	_AVS(ph)LDSPVSVGSGPPVK_	AVS(1)LDSPVSVGSGPPVK	AVS(73.17)LDS(-73.17)PVS(-119.8)VGS(-176.48)GPPVK	3	2	838.419	-0.25465	0.71087	0.71087	NaN	NaN	0.85596	0.85596	NaN	NaN	NaN
Q05BA5;A2A468;O09000	849;849;850	Q05BA5	Q05BA5	Nuclear receptor coactivator 3	Ncoa3;Ncoa3;Ncoa3	>tr|Q05BA5|Q05BA5_MOUSE Nuclear receptor coactivator 3 OS=Mus musculus GN=Ncoa3 PE=2 SV=1;>tr|A2A468|A2A468_MOUSE Nuclear receptor coactivator 3 OS=Mus musculus GN=Ncoa3 PE=4 SV=1;>sp|O09000|NCOA3_MOUSE Nuclear receptor coactivator 3 OS=Mus musculus GN=Nco	0.63161	2.46245					0.63161	2.46245	0.00163343	72.21										1	S	VQSVRPPYNRAVSLDSPVSVGSGPPVKNVSA	X;X;X;X;X;X;X;X;X;X;X;X;X;X;X;Phospho (STY);X;X;X;X;X;X;X;X;X;X;X;X;X;X;X	XXXXXXXXXXPPPPPPPPPPPPPPPPPXXXX	0.00163343	72.21	72.21	_AVSLDS(ph)PVSVGSGPPVK_	AVS(0.358)LDS(0.632)PVS(0.01)VGSGPPVK	AVS(-2.46)LDS(2.46)PVS(-17.96)VGS(-46.65)GPPVK	6	2	838.419	-0.67294	0.65142	0.65142	NaN	NaN	0.72011	0.72011	NaN	NaN	NaN
Q05BA5;A2A468;O09000	543;543;544	Q05BA5	Q05BA5	Nuclear receptor coactivator 3	Ncoa3;Ncoa3;Ncoa3	>tr|Q05BA5|Q05BA5_MOUSE Nuclear receptor coactivator 3 OS=Mus musculus GN=Ncoa3 PE=2 SV=1;>tr|A2A468|A2A468_MOUSE Nuclear receptor coactivator 3 OS=Mus musculus GN=Ncoa3 PE=4 SV=1;>sp|O09000|NCOA3_MOUSE Nuclear receptor coactivator 3 OS=Mus musculus GN=Nco	1	65.941					1	65.941	0.000104987	119.92	0.999998	57.2701	0.000764991	88.385	0.999989	49.6103	0.0191285	101.78		1	S	SLLSTLSSPGPKLDNSPNMNISQPSKVSGQD	X;X;X;X;X;X;X;X;X;X;X;X;X;X;X;Phospho (STY);X;X;X;X;X;X;X;X;X;X;X;X;X;X;X	XXXXXXXXXXXXPPPPPPPPPPPPPPXXXXX	0.000104987	119.92	119.92	_LDNS(ph)PNMNISQPSK_	LDNS(1)PNMNISQPSK	LDNS(65.94)PNMNIS(-65.94)QPS(-105.88)K	4	2	812.855	0.27399	0.60971	0.60971	NaN	NaN	0.59331	0.59331	NaN	NaN	NaN
Q05BA5;A2A468;O09000	259;259;260	Q05BA5	Q05BA5	Nuclear receptor coactivator 3	Ncoa3;Ncoa3;Ncoa3	>tr|Q05BA5|Q05BA5_MOUSE Nuclear receptor coactivator 3 OS=Mus musculus GN=Ncoa3 PE=2 SV=1;>tr|A2A468|A2A468_MOUSE Nuclear receptor coactivator 3 OS=Mus musculus GN=Ncoa3 PE=4 SV=1;>sp|O09000|NCOA3_MOUSE Nuclear receptor coactivator 3 OS=Mus musculus GN=Nco	0.49639	0	0.49639	0	0.00459892	67.685	0.326004	0	0.0481969	44.457					0.493793	0	0.000273723	108.18			S	CCMICVARRVTAPFPSSPESFITRHDLSGKV	X;X;X;X;X;X;X;X;X;X;X;X;X;X;X;Phospho (STY);X;X;X;X;X;X;X;X;X;X;X;X;X;X;X	XXXXXXXXXPPPPPPPPPPPPPPPXXXXXXX	0.000273723	108.18	67.685	_VTAPFPS(ph)SPESFITR_	VTAPFPS(0.496)S(0.496)PES(0.003)FIT(0.004)R	VT(-54.94)APFPS(0)S(0)PES(-22.07)FIT(-20.79)R	7	2	858.406	0.067001
Q05BA5;A2A468;O09000	260;260;261	Q05BA5	Q05BA5	Nuclear receptor coactivator 3	Ncoa3;Ncoa3;Ncoa3	>tr|Q05BA5|Q05BA5_MOUSE Nuclear receptor coactivator 3 OS=Mus musculus GN=Ncoa3 PE=2 SV=1;>tr|A2A468|A2A468_MOUSE Nuclear receptor coactivator 3 OS=Mus musculus GN=Ncoa3 PE=4 SV=1;>sp|O09000|NCOA3_MOUSE Nuclear receptor coactivator 3 OS=Mus musculus GN=Nco	0.804313	6.35815	0.49639	0	0.00459892	67.685	0.804313	6.35815	0.00395527	103.13	0.784704	6.32137	0.000412371	96.464	0.493793	0	0.000633227	91.657		1	S	CMICVARRVTAPFPSSPESFITRHDLSGKVV	X;X;X;X;X;X;X;X;X;X;X;X;X;X;X;Phospho (STY);X;X;X;X;X;X;X;X;X;X;X;X;X;X;X	XXXXXXXXPPPPPPPPPPPPPPPXXXXXXXX	0.000412371	103.13	103.13	_VTAPFPSS(ph)PESFITR_	VTAPFPS(0.008)S(0.804)PES(0.186)FIT(0.002)R	VT(-80.15)APFPS(-20.04)S(6.36)PES(-6.36)FIT(-26.79)R	8	2	858.406	0.23294	0.62738	0.62738	NaN	NaN	0.69807	0.69807	NaN	NaN	NaN
Q05BA5;A2A468;O09000	263;263;264	Q05BA5	Q05BA5	Nuclear receptor coactivator 3	Ncoa3;Ncoa3;Ncoa3	>tr|Q05BA5|Q05BA5_MOUSE Nuclear receptor coactivator 3 OS=Mus musculus GN=Ncoa3 PE=2 SV=1;>tr|A2A468|A2A468_MOUSE Nuclear receptor coactivator 3 OS=Mus musculus GN=Ncoa3 PE=4 SV=1;>sp|O09000|NCOA3_MOUSE Nuclear receptor coactivator 3 OS=Mus musculus GN=Nco	0.63499	2.62535					0.326004	0	0.0481969	44.457					0.63499	2.62535	0.000273723	108.18		1	S	CVARRVTAPFPSSPESFITRHDLSGKVVNID	X;X;X;X;X;X;X;X;X;X;X;X;X;X;X;Phospho (STY);X;X;X;X;X;X;X;X;X;X;X;X;X;X;X	XXXXXPPPPPPPPPPPPPPPXXXXXXXXXXX	0.000273723	108.18	83.53	_VTAPFPSSPES(ph)FITR_	VTAPFPS(0.014)S(0.347)PES(0.635)FIT(0.004)R	VT(-69.7)APFPS(-16.51)S(-2.63)PES(2.63)FIT(-22.11)R	11	2	858.406	0.15769	2.3419	2.3419	NaN	NaN	2.2828	2.2828	NaN	NaN	NaN
A2A484;E9Q8D3;A2A482;E9Q8D1;A2A483;Q3U1M7;Q3UH28;A2A485	674;662;645;690;670;665;645;665	A2A484	A2A484		Zmynd8;Zmynd8;Zmynd8;Zmynd8;Zmynd8;Zmynd8;Zmynd8;Zmynd8	>tr|A2A484|A2A484_MOUSE Protein Zmynd8 OS=Mus musculus GN=Zmynd8 PE=4 SV=1;>tr|E9Q8D3|E9Q8D3_MOUSE Protein Zmynd8 OS=Mus musculus GN=Zmynd8 PE=4 SV=2;>tr|A2A482|A2A482_MOUSE Protein Zmynd8 OS=Mus musculus GN=Zmynd8 PE=4 SV=1;>tr|E9Q8D1|E9Q8D1_MOUSE Protein	1	39.5168	1	57.7875	0.000285878	101.42	1	56.4241	2.24137e-09	139.49	1	51.5913	0.000390113	96.096	1	39.5168	7.2154e-14	148.41		1	S	PVSEKPDPTPAKDKASPEPEKDFVEKAKPSP	X;X;X;X;X;X;X;X;X;X;X;X;X;X;X;Phospho (STY);X;X;X;X;X;X;X;X;X;X;X;X;X;X;X	XXXXXXXXXXXXPPPPPPPPPPPPPPXXXXX	7.2154e-14	148.41	39.517	_DKAS(ph)PEPEKDFVEK_	DKAS(1)PEPEKDFVEK	DKAS(39.52)PEPEKDFVEK	4	3	566.926	0.071673	0.83346	0.83346	NaN	NaN	1.0373	1.0373	NaN	NaN	NaN
A2A484;E9Q8D3;A2A482;E9Q8D1;A2A483;Q3U1M7;Q3UH28;A2A485	553;541;524;569;549;544;524;544	A2A484	A2A484		Zmynd8;Zmynd8;Zmynd8;Zmynd8;Zmynd8;Zmynd8;Zmynd8;Zmynd8	>tr|A2A484|A2A484_MOUSE Protein Zmynd8 OS=Mus musculus GN=Zmynd8 PE=4 SV=1;>tr|E9Q8D3|E9Q8D3_MOUSE Protein Zmynd8 OS=Mus musculus GN=Zmynd8 PE=4 SV=2;>tr|A2A482|A2A482_MOUSE Protein Zmynd8 OS=Mus musculus GN=Zmynd8 PE=4 SV=1;>tr|E9Q8D1|E9Q8D1_MOUSE Protein	1	86.7716	1	104.661	2.99225e-59	190.8	1	98.995	1.64839e-27	158.94	1	82.5978	4.16566e-28	163.4	1	86.7716	1.12112e-10	127.96		1	S	LSESVQQQSAPVPLISPKRQIRSRFQLNLDK	X;X;X;X;X;X;X;X;X;X;X;X;X;X;X;Phospho (STY);X;X;X;X;X;X;X;X;X;X;X;X;X;X;X	PPPPPPPPPPPPPPPPPPXXXXXXXXXXXXX	2.99225e-59	190.8	116.35	_ELSESVQQQSAPVPLIS(ph)PK_	ELSESVQQQSAPVPLIS(1)PK	ELS(-111)ES(-108.32)VQQQS(-86.77)APVPLIS(86.77)PK	17	2	1059.03	0.23114	1.1071	1.1071	NaN	NaN	1.1411	1.1411	NaN	NaN	NaN
A2A484;E9Q8D3;A2A482;E9Q8D1;A2A483;Q3U1M7;Q3UH28;A2A485;A2A480;A2A481	429;417;400;445;425;420;400;420;420;400	A2A484	A2A484		Zmynd8;Zmynd8;Zmynd8;Zmynd8;Zmynd8;Zmynd8;Zmynd8;Zmynd8;Zmynd8;Zmynd8	>tr|A2A484|A2A484_MOUSE Protein Zmynd8 OS=Mus musculus GN=Zmynd8 PE=4 SV=1;>tr|E9Q8D3|E9Q8D3_MOUSE Protein Zmynd8 OS=Mus musculus GN=Zmynd8 PE=4 SV=2;>tr|A2A482|A2A482_MOUSE Protein Zmynd8 OS=Mus musculus GN=Zmynd8 PE=4 SV=1;>tr|E9Q8D1|E9Q8D1_MOUSE Protein	0.99997	45.2435	0.99953	33.2796	0.00165531	105.65	0.999876	39.0649	0.00191034	104.24	0.999755	36.1116	0.000849328	112.44	0.99997	45.2435	0.00115432	108.72		1	S	LLSKPLLSGGAGRRISLSDMPRSPTSTNSSV	X;X;X;X;X;X;X;X;X;X;X;X;X;X;X;Phospho (STY);X;X;X;Oxidation (M);X;X;X;X;X;X;X;X;X;X;X	XXXXXXXXXXXXXPPPPPPPPPXXXXXXXXX	0.000849328	112.44	108.72	_RIS(ph)LSDMPR_	RIS(1)LSDMPR	RIS(45.24)LS(-45.24)DMPR	3	2	577.773	0.085966	0.73976	0.73976	NaN	NaN	0.91364	0.91364	NaN	NaN	NaN
A2A484;E9Q8D3;A2A482;E9Q8D1;A2A483;Q3U1M7;Q3UH28;A2A485;A2A480;A2A481	410;398;381;426;406;401;381;401;401;381	A2A484	A2A484		Zmynd8;Zmynd8;Zmynd8;Zmynd8;Zmynd8;Zmynd8;Zmynd8;Zmynd8;Zmynd8;Zmynd8	>tr|A2A484|A2A484_MOUSE Protein Zmynd8 OS=Mus musculus GN=Zmynd8 PE=4 SV=1;>tr|E9Q8D3|E9Q8D3_MOUSE Protein Zmynd8 OS=Mus musculus GN=Zmynd8 PE=4 SV=2;>tr|A2A482|A2A482_MOUSE Protein Zmynd8 OS=Mus musculus GN=Zmynd8 PE=4 SV=1;>tr|E9Q8D1|E9Q8D1_MOUSE Protein	0.999979	46.8831	0.999947	42.7469	7.73568e-08	179.5	0.999956	43.5567	7.78601e-05	135.81	0.999979	46.8831	7.73568e-08	179.5	0.999936	41.9534	5.98252e-08	180.48		1	S	TDKQEKVKLNFDMTASPKILLSKPLLSGGAG	X;X;X;X;X;X;X;X;X;X;X;X;Oxidation (M);X;X;Phospho (STY);X;X;X;X;X;X;X;X;X;X;X;X;X;X;X	XXXXXXXXPPPPPPPPPPXXXXXXXXXXXXX	5.98252e-08	180.48	124.07	_LNFDMTAS(ph)PK_	LNFDMTAS(1)PK	LNFDMT(-46.88)AS(46.88)PK	8	2	602.259	0.45735	0.88472	0.88472	NaN	NaN	1.0368	1.0368	NaN	NaN	NaN
A2A484;E9Q8D3;A2A482;E9Q8D1;A2A483;Q3U1M7;Q3UH28;A2A485	755;743;726;771;751;746;726;746	A2A484	A2A484		Zmynd8;Zmynd8;Zmynd8;Zmynd8;Zmynd8;Zmynd8;Zmynd8;Zmynd8	>tr|A2A484|A2A484_MOUSE Protein Zmynd8 OS=Mus musculus GN=Zmynd8 PE=4 SV=1;>tr|E9Q8D3|E9Q8D3_MOUSE Protein Zmynd8 OS=Mus musculus GN=Zmynd8 PE=4 SV=2;>tr|A2A482|A2A482_MOUSE Protein Zmynd8 OS=Mus musculus GN=Zmynd8 PE=4 SV=1;>tr|E9Q8D1|E9Q8D1_MOUSE Protein	0.233626	0.702118	0.233626	0.702118	0.000283614	53.968															S	KVPSPKQDAIGKPPPSSTSAGNQSPPETPVL	X;X;X;X;X;X;X;X;X;X;X;X;X;X;X;Phospho (STY);X;X;X;X;X;X;X;X;X;X;X;X;X;X;X	XXXXXXPPPPPPPPPPPPPPPPPPPPPPPPP	0.000283614	53.968	53.968	_QDAIGKPPPS(ph)STSAGNQSPPETPVLTR_	QDAIGKPPPS(0.234)S(0.199)T(0.199)S(0.199)AGNQS(0.17)PPETPVLTR	QDAIGKPPPS(0.7)S(-0.7)T(-0.7)S(-0.7)AGNQS(-1.39)PPET(-26.86)PVLT(-36.68)R	10	3	938.122	0.39421
A2A484;E9Q8D3;A2A482;E9Q8D1;A2A483;Q3U1M7;Q3UH28;A2A485	763;751;734;779;759;754;734;754	A2A484	A2A484		Zmynd8;Zmynd8;Zmynd8;Zmynd8;Zmynd8;Zmynd8;Zmynd8;Zmynd8	>tr|A2A484|A2A484_MOUSE Protein Zmynd8 OS=Mus musculus GN=Zmynd8 PE=4 SV=1;>tr|E9Q8D3|E9Q8D3_MOUSE Protein Zmynd8 OS=Mus musculus GN=Zmynd8 PE=4 SV=2;>tr|A2A482|A2A482_MOUSE Protein Zmynd8 OS=Mus musculus GN=Zmynd8 PE=4 SV=1;>tr|E9Q8D1|E9Q8D1_MOUSE Protein	0.998852	31.0213	0.674437	4.68808	4.40624e-09	71.905	0.997718	30.0979	1.90878e-30	111.11	0.998615	29.8237	1.26448e-39	141.36	0.998852	31.0213	1.56542e-64	171.5		1	S	AIGKPPPSSTSAGNQSPPETPVLTRSATQAP	X;X;X;X;X;X;X;X;X;X;X;X;X;X;X;Phospho (STY);X;X;X;X;X;X;X;X;X;X;X;X;X;X;X	PPPPPPPPPPPPPPPPPPPPPPPPPXXXXXX	1.56542e-64	171.5	101.41	_QDAIGKPPPSSTSAGNQS(ph)PPETPVLTR_	QDAIGKPPPSSTS(0.001)AGNQS(0.999)PPETPVLTR	QDAIGKPPPS(-45.28)S(-45.28)T(-45.28)S(-31.02)AGNQS(31.02)PPET(-35.74)PVLT(-55.87)R	18	3	938.122	0.11395	0.79546	0.79546	NaN	NaN	0.79246	0.79246	NaN	NaN	NaN
A2A484;E9Q8D3;A2A482;E9Q8D1;A2A483;Q3U1M7;Q3UH28;A2A485	656;644;627;672;652;647;627;647	A2A484	A2A484		Zmynd8;Zmynd8;Zmynd8;Zmynd8;Zmynd8;Zmynd8;Zmynd8;Zmynd8	>tr|A2A484|A2A484_MOUSE Protein Zmynd8 OS=Mus musculus GN=Zmynd8 PE=4 SV=1;>tr|E9Q8D3|E9Q8D3_MOUSE Protein Zmynd8 OS=Mus musculus GN=Zmynd8 PE=4 SV=2;>tr|A2A482|A2A482_MOUSE Protein Zmynd8 OS=Mus musculus GN=Zmynd8 PE=4 SV=1;>tr|E9Q8D1|E9Q8D1_MOUSE Protein	0.987026	18.8148	0.987026	18.8148	4.10751e-26	190.24	0.911023	10.1025	2.97661e-55	227.46	0.873243	8.38342	1.64989e-21	169.67	0.886971	8.96436	7.84026e-37	204.05		1	S	KPKPTNQVEVKEEAKSNSPVSEKPDPTPAKD	X;X;X;X;X;X;X;X;X;X;X;X;X;X;X;Phospho (STY);X;X;X;X;X;X;X;X;X;X;X;X;X;X;X	XXXXXXXXXXXXXXXPPPPPPPPPPPPPPPX	2.97661e-55	227.46	176.28	_S(ph)NSPVSEKPDPTPAK_	S(0.987)NS(0.013)PVSEKPDPTPAK	S(18.81)NS(-18.81)PVS(-51.37)EKPDPT(-130.37)PAK	1	2	817.377	-0.085817	0.6602	0.6602	NaN	NaN	0.97529	0.97529	NaN	NaN	NaN
A2A484;E9Q8D3;A2A482;E9Q8D1;A2A483;Q3U1M7;Q3UH28;A2A485	658;646;629;674;654;649;629;649	A2A484	A2A484		Zmynd8;Zmynd8;Zmynd8;Zmynd8;Zmynd8;Zmynd8;Zmynd8;Zmynd8	>tr|A2A484|A2A484_MOUSE Protein Zmynd8 OS=Mus musculus GN=Zmynd8 PE=4 SV=1;>tr|E9Q8D3|E9Q8D3_MOUSE Protein Zmynd8 OS=Mus musculus GN=Zmynd8 PE=4 SV=2;>tr|A2A482|A2A482_MOUSE Protein Zmynd8 OS=Mus musculus GN=Zmynd8 PE=4 SV=1;>tr|E9Q8D1|E9Q8D1_MOUSE Protein	0.88605	8.90947	0.88605	8.90947	2.24748e-30	194.19	0.812071	6.37681	4.70888e-45	214.46	0.499987	0	2.67227e-21	166.52	0.499928	0	1.49833e-15	154.48		1	S	KPTNQVEVKEEAKSNSPVSEKPDPTPAKDKA	X;X;X;X;X;X;X;X;X;X;X;X;X;X;X;Phospho (STY);X;X;X;X;X;X;X;X;X;X;X;X;X;X;X	XXXXXXXXXXXXXPPPPPPPPPPPPPPPXXX	4.70888e-45	214.46	194.19	_SNS(ph)PVSEKPDPTPAK_	S(0.114)NS(0.886)PVSEKPDPTPAK	S(-8.91)NS(8.91)PVS(-42.17)EKPDPT(-122.81)PAK	3	2	817.377	0.20171	0.61798	0.61798	NaN	NaN	0.84742	0.84742	NaN	NaN	NaN
A2A4B1;Q99PI4;A2A4B3	218;218;218	A2A4B1	A2A4B1	Phosphatidate phosphatase LPIN3	Lpin3;Lpin3;Lpin3	>tr|A2A4B1|A2A4B1_MOUSE Lipin 3 OS=Mus musculus GN=Lpin3 PE=4 SV=1;>sp|Q99PI4|LPIN3_MOUSE Phosphatidate phosphatase LPIN3 OS=Mus musculus GN=Lpin3 PE=1 SV=1;>tr|A2A4B3|A2A4B3_MOUSE Lipin 3 OS=Mus musculus GN=Lpin3 PE=4 SV=1	0.999993	51.5065	0.999331	31.744	0.00056522	164.97	0.996453	24.4857	0.00056522	164.97	0.999974	45.8718	3.85316e-11	212.21	0.999993	51.5065	1.86311e-25	240.38		1	S	TPQANLSSGDLMSPKSDSELELRSLEPSPLR	X;X;X;X;X;X;X;X;X;X;X;X;X;X;X;Phospho (STY);X;X;X;X;X;X;X;X;X;X;X;X;X;X;X	XXXXXXXXXXXXXXXPPPPPPPPXXXXXXXX	1.86311e-25	240.38	240.38	_S(ph)DSELELR_	S(1)DSELELR	S(51.51)DS(-51.51)ELELR	1	2	514.718	-0.2429	0.45889	0.45889	NaN	NaN	0.47572	0.47572	NaN	NaN	NaN
A2A4B1;Q99PI4;A2A4B3	220;220;220	A2A4B1	A2A4B1	Phosphatidate phosphatase LPIN3	Lpin3;Lpin3;Lpin3	>tr|A2A4B1|A2A4B1_MOUSE Lipin 3 OS=Mus musculus GN=Lpin3 PE=4 SV=1;>sp|Q99PI4|LPIN3_MOUSE Phosphatidate phosphatase LPIN3 OS=Mus musculus GN=Lpin3 PE=1 SV=1;>tr|A2A4B3|A2A4B3_MOUSE Lipin 3 OS=Mus musculus GN=Lpin3 PE=4 SV=1	0.973082	15.5811	0.973082	15.5811	0.000728383	152.54	0.656043	2.80428	0.00271171	117.7										1	S	QANLSSGDLMSPKSDSELELRSLEPSPLRAE	X;X;X;X;X;X;X;X;X;X;X;X;X;X;X;Phospho (STY);X;X;X;X;X;X;X;X;X;X;X;X;X;X;X	XXXXXXXXXXXXXPPPPPPPPXXXXXXXXXX	0.000728383	152.54	152.54	_SDS(ph)ELELR_	S(0.027)DS(0.973)ELELR	S(-15.58)DS(15.58)ELELR	3	2	514.718	0.054028	1.2153	1.2153	NaN	NaN	1.6701	1.6701	NaN	NaN	NaN
K3W4P1;P97432;A2A4N7;A2A4N8;A2A4N5;Q05BC8;F6S397	657;657;657;620;657;657;417	K3W4P1	K3W4P1	Next to BRCA1 gene 1 protein	Nbr1;Nbr1;Nbr1;Nbr1;Nbr1;Nbr1	>tr|K3W4P1|K3W4P1_MOUSE Next to BRCA1 gene 1 protein OS=Mus musculus GN=Nbr1 PE=4 SV=1;>sp|P97432|NBR1_MOUSE Next to BRCA1 gene 1 protein OS=Mus musculus GN=Nbr1 PE=1 SV=1;>tr|A2A4N7|A2A4N7_MOUSE Neighbor of Brca1 gene 1 OS=Mus musculus GN=Nbr1 PE=4 SV=1;>	0.890487	9.1016	0.890487	9.1016	0.00180858	107.03					0.787792	5.6965	0.00262805	111.34						1	S	EDLSGTQFVCETVIRSLTLDAAPDHNPPCRQ	X;X;X;X;X;X;X;X;X;X;X;X;X;X;X;Phospho (STY);X;X;X;X;X;X;X;X;X;X;X;X;X;X;X	XXXXXXXXXXXXXXXPPPPPPPPPPPPPPPX	0.00180858	111.34	83.894	_S(ph)LTLDAAPDHNPPCR_	S(0.89)LT(0.11)LDAAPDHNPPCR	S(9.1)LT(-9.1)LDAAPDHNPPCR	1	2	872.38	-0.0084919	0.63409	0.63409	NaN	NaN	0.72205	0.72205	NaN	NaN	NaN
A2A4P5;A2A4P2	147;95	A2A4P5	A2A4P5		Aarsd1;Aarsd1	>tr|A2A4P5|A2A4P5_MOUSE Alanyl-tRNA synthetase domain containing 1 OS=Mus musculus GN=Aarsd1 PE=4 SV=1;>tr|A2A4P2|A2A4P2_MOUSE Alanyl-tRNA synthetase domain containing 1 (Fragment) OS=Mus musculus GN=Aarsd1 PE=4 SV=1	0.997515	26.0357	0.995674	23.6205	0.0012117	124.68	0.997515	26.0357	3.98462e-31	193.32					0.985075	18.1955	1.01909e-18	177.58		1	S	STKRPPPAMDDLDDDSDS_____________	X;X;X;X;X;X;X;X;Oxidation (M);X;X;X;X;X;X;Phospho (STY);X;X;X;X;X;X;X;X;X;X;X;X;X;X;X	XXXPPPPPPPPPPPPPPPXXXXXXXXXXXXX	3.98462e-31	193.32	193.32	_RPPPAMDDLDDDS(ph)DS_	RPPPAMDDLDDDS(0.998)DS(0.002)	RPPPAMDDLDDDS(26.04)DS(-26.04)	13	2	863.319	-0.35517	0.68831	0.68831	NaN	NaN	0.85831	0.85831	NaN	NaN	NaN
A2A4P5;A2A4P2	149;97	A2A4P5	A2A4P5		Aarsd1;Aarsd1	>tr|A2A4P5|A2A4P5_MOUSE Alanyl-tRNA synthetase domain containing 1 OS=Mus musculus GN=Aarsd1 PE=4 SV=1;>tr|A2A4P2|A2A4P2_MOUSE Alanyl-tRNA synthetase domain containing 1 (Fragment) OS=Mus musculus GN=Aarsd1 PE=4 SV=1	0.873492	8.39142					0.873492	8.39142	4.13467e-19	180.1					0.5	0	0.00251663	70.96		1	S	KRPPPAMDDLDDDSDS_______________	X;X;X;X;X;X;X;X;X;X;X;X;X;X;X;Phospho (STY);X;X;X;X;X;X;X;X;X;X;X;X;X;X;X	XPPPPPPPPPPPPPPPXXXXXXXXXXXXXXX	4.13467e-19	180.1	180.1	_RPPPAMDDLDDDSDS(ph)_	RPPPAMDDLDDDS(0.127)DS(0.873)	RPPPAMDDLDDDS(-8.39)DS(8.39)	15	2	863.319	-0.6911	0.6451	0.6451	NaN	NaN	0.83352	0.83352	NaN	NaN	NaN
A2A4P4;A2A4P3;Q3THG9	219;201;88	A2A4P4	A2A4P4	Alanyl-tRNA editing protein Aarsd1	Aarsd1;Aarsd1;Aarsd1	>tr|A2A4P4|A2A4P4_MOUSE Alanyl-tRNA synthetase domain containing 1 OS=Mus musculus GN=Aarsd1 PE=4 SV=1;>tr|A2A4P3|A2A4P3_MOUSE Alanyl-tRNA synthetase domain containing 1 OS=Mus musculus GN=Aarsd1 PE=4 SV=1;>sp|Q3THG9|AASD1_MOUSE Alanyl-tRNA editing protein	0.975757	16.0924					0.926178	11.1864	0.00875418	73.057	0.975757	16.0924	2.85356e-05	77.031	0.971101	15.5265	1.11231e-06	102.33		1	S	TRRGAQADHFTESPLSPGSQVQVRVDWERRF	X;X;X;X;X;X;X;X;X;X;X;X;X;X;X;Phospho (STY);X;X;X;X;X;X;X;X;X;X;X;X;X;X;X	XXXPPPPPPPPPPPPPPPPPPPPPXXXXXXX	1.11231e-06	102.33	77.031	_GAQADHFTESPLS(ph)PGSQVQVR_	GAQADHFTESPLS(0.976)PGS(0.024)QVQVR	GAQADHFT(-50.62)ES(-36.08)PLS(16.09)PGS(-16.09)QVQVR	13	3	764.353	-0.29847	2.1329	2.1329	NaN	NaN	2.2076	2.2076	NaN	NaN	NaN
A2A4P4;A2A4P3;Q3THG9	222;204;91	A2A4P4	A2A4P4	Alanyl-tRNA editing protein Aarsd1	Aarsd1;Aarsd1;Aarsd1	>tr|A2A4P4|A2A4P4_MOUSE Alanyl-tRNA synthetase domain containing 1 OS=Mus musculus GN=Aarsd1 PE=4 SV=1;>tr|A2A4P3|A2A4P3_MOUSE Alanyl-tRNA synthetase domain containing 1 OS=Mus musculus GN=Aarsd1 PE=4 SV=1;>sp|Q3THG9|AASD1_MOUSE Alanyl-tRNA editing protein	0.652312	2.75973									0.652312	2.75973	0.000707244	61.757						1	S	GAQADHFTESPLSPGSQVQVRVDWERRFDHM	X;X;X;X;X;X;X;X;X;X;X;X;X;X;X;Phospho (STY);X;X;X;X;X;X;X;X;X;X;X;X;X;X;X	PPPPPPPPPPPPPPPPPPPPPXXXXXXXXXX	0.000707244	61.757	61.757	_GAQADHFTESPLSPGS(ph)QVQVR_	GAQADHFTES(0.002)PLS(0.346)PGS(0.652)QVQVR	GAQADHFT(-32.31)ES(-25.65)PLS(-2.76)PGS(2.76)QVQVR	16	3	764.353	-1.2707	3.3199	3.3199	NaN	NaN	3.6721	3.6721	NaN	NaN	NaN
A2A5K6	976	A2A5K6	A2A5K6		Zfp335	>sp|A2A5K6|ZN335_MOUSE Zinc finger protein 335 OS=Mus musculus GN=Znf335 PE=2 SV=1	0.963168	14.1748	0.949017	13.0708	0.0613092	68.171					0.963168	14.1748	0.00093073	101.39						1	S	LLQCGGPPRDGSEVLSPTKTHHMGGSQGSST	X;X;X;X;X;X;X;X;X;X;X;X;X;X;X;Phospho (STY);X;X;X;X;X;X;X;X;X;X;X;X;X;X;X	XXXXXXXXXPPPPPPPPPPXXXXXXXXXXXX	0.00093073	101.39	82.85	_DGSEVLS(ph)PTK_	DGSEVLS(0.963)PT(0.037)K	DGS(-65.73)EVLS(14.17)PT(-14.17)K	7	2	556.747	0.26355	1.1341	1.1341	NaN	NaN	1.1306	1.1306	NaN	NaN	NaN
A2A5R2;F6YCJ0	218;129	A2A5R2	A2A5R2		Arfgef2;Arfgef2	>sp|A2A5R2|BIG2_MOUSE Brefeldin A-inhibited guanine nucleotide-exchange protein 2 OS=Mus musculus GN=Arfgef2 PE=1 SV=1;>tr|F6YCJ0|F6YCJ0_MOUSE Brefeldin A-inhibited guanine nucleotide-exchange protein 2 (Fragment) OS=Mus musculus GN=Arfgef2 PE=4 SV=1	1	79.3342									1	79.3342	0.0607648	140.46	0.996612	27.2399	0.00317913	57.484		1;2	S	QEARELEKPMQSKPQSPVIQATAGSPKFSRL	X;X;X;X;X;X;X;X;X;X;X;X;X;X;X;Phospho (STY);X;X;X;X;X;X;X;X;Phospho (STY);X;X;X;X;X;X	XXXXPPPPPPPPPPPPPPPPPPPPPPPXXXX	3.25945e-05	140.46	140.46	_PQS(ph)PVIQATAGSPK_	PQS(1)PVIQATAGSPK	PQS(79.33)PVIQAT(-79.33)AGS(-90.38)PK	3	2	730.861	-0.31339	1.5489	1.5489	1.354	NaN	1.4807	1.4807	1.4906	NaN	NaN
A2A5R2;F6YCJ0	227;138	A2A5R2	A2A5R2		Arfgef2;Arfgef2	>sp|A2A5R2|BIG2_MOUSE Brefeldin A-inhibited guanine nucleotide-exchange protein 2 OS=Mus musculus GN=Arfgef2 PE=1 SV=1;>tr|F6YCJ0|F6YCJ0_MOUSE Brefeldin A-inhibited guanine nucleotide-exchange protein 2 (Fragment) OS=Mus musculus GN=Arfgef2 PE=4 SV=1	1	63.017	0.999994	52.0903	4.2743e-106	260.31	0.999993	51.6343	5.93176e-74	242.18	0.999984	47.8897	4.05492e-54	240.13	1	63.017	1.0606e-106	266.78		1;2	S	MQSKPQSPVIQATAGSPKFSRLKQSQAQSKP	Oxidation (M);X;X;X;X;X;Phospho (STY);X;X;X;X;X;X;X;X;Phospho (STY);X;X;X;X;X;X;X;X;X;X;X;X;X;X;X	PPPPPPPPPPPPPPPPPPXXXXXXXXXXXXX	1.0606e-106	266.78	223.65	_PQSPVIQATAGS(ph)PK_	PQSPVIQATAGS(1)PK	PQS(-177.53)PVIQAT(-63.02)AGS(63.02)PK	12	2	730.861	-0.27814	0.77121	0.77121	1.354	NaN	1.0542	1.0542	1.4906	NaN	NaN
A2A5R2	1532	A2A5R2	A2A5R2		Arfgef2	>sp|A2A5R2|BIG2_MOUSE Brefeldin A-inhibited guanine nucleotide-exchange protein 2 OS=Mus musculus GN=Arfgef2 PE=1 SV=1	1	92.8751	0.502455	0.0434847	0.000159365	116.13	1	91.9414	3.75811e-05	130.36					1	92.8751	0.000227847	124.2		1;2	S	QSLSSIDRNASERGQSQLSNPTDDSWKGAPY	X;X;X;X;X;X;X;X;X;X;X;X;X;X;X;Phospho (STY);X;X;Phospho (STY);X;X;Phospho (STY);X;X;X;X;X;X;X;X;X	XXXXXXXXXXXXXPPPPPPPPPPPPPPXXXX	3.75811e-05	130.36	116.73	_GQS(ph)QLS(ph)NPTDDSWK_	GQS(1)QLS(0.999)NPT(0.001)DDSWK	GQS(92.88)QLS(30.87)NPT(-30.87)DDS(-50.09)WK	3	2	861.824	0.37123	0.66994	0.66994	0.97933	NaN	0.91725	0.91725	1.0129	NaN	NaN
A2A5R2	1535	A2A5R2	A2A5R2		Arfgef2	>sp|A2A5R2|BIG2_MOUSE Brefeldin A-inhibited guanine nucleotide-exchange protein 2 OS=Mus musculus GN=Arfgef2 PE=1 SV=1	0.999989	50.0241	0.999902	42.1905	1.7822e-09	141.6	0.999974	46.0424	2.72637e-24	199.41	0.999989	50.0241	3.65411e-19	186.45	0.999948	45.2233	1.70542e-16	181.4		1;2	S	SSIDRNASERGQSQLSNPTDDSWKGAPYAHQ	X;X;X;X;X;X;X;X;X;X;X;X;Phospho (STY);X;X;Phospho (STY);X;X;X;X;X;X;X;X;X;X;X;X;X;X;X	XXXXXXXXXXPPPPPPPPPPPPPPXXXXXXX	2.72637e-24	199.41	171.04	_GQSQLS(ph)NPTDDSWK_	GQSQLS(1)NPTDDSWK	GQS(-50.02)QLS(50.02)NPT(-59.39)DDS(-109.87)WK	6	2	821.841	-0.1447	0.84783	0.84783	1.0543	NaN	0.97343	0.97343	0.95233	NaN	NaN
A2A5R2;F6YCJ0	355;243	A2A5R2	A2A5R2		Arfgef2;Arfgef2	>sp|A2A5R2|BIG2_MOUSE Brefeldin A-inhibited guanine nucleotide-exchange protein 2 OS=Mus musculus GN=Arfgef2 PE=1 SV=1;>tr|F6YCJ0|F6YCJ0_MOUSE Brefeldin A-inhibited guanine nucleotide-exchange protein 2 (Fragment) OS=Mus musculus GN=Arfgef2 PE=4 SV=1	0.522236	1.38005					0.522236	1.38005	0.00191965	56.817					0.460971	0	0.0272665	38.824		1	S	ENSQTNGIADDRQSLSSADNLEPDVQGHQVA	X;X;X;X;X;X;X;X;X;X;X;X;X;X;X;Phospho (STY);X;X;X;X;X;X;X;X;X;X;X;X;X;X;X	XXXXXXXXXXXXPPPPPPPPPPPPPPPPPPP	0.00191965	56.817	56.817	_QSLS(ph)SADNLEPDVQGHQVAAR_	QS(0.098)LS(0.522)S(0.38)ADNLEPDVQGHQVAAR	QS(-7.28)LS(1.38)S(-1.38)ADNLEPDVQGHQVAAR	4	3	768.02	0.15493	2.6499	2.6499	NaN	NaN	2.9057	2.9057	NaN	NaN	NaN
A2A5V4;P55194;A2A5V2;A2A5V3	257;177;257;257	A2A5V4	A2A5V4	SH3 domain-binding protein 1	Sh3bp1;Sh3bp1;Sh3bp1;Sh3bp1	>tr|A2A5V4|A2A5V4_MOUSE SH3 domain-binding protein 1 OS=Mus musculus GN=Sh3bp1 PE=4 SV=1;>sp|P55194|3BP1_MOUSE SH3 domain-binding protein 1 OS=Mus musculus GN=Sh3bp1 PE=1 SV=2;>tr|A2A5V2|A2A5V2_MOUSE SH3 domain-binding protein 1 OS=Mus musculus GN=Sh3bp1 P	0.975212	16.9072	0.975212	16.9072	0.00296298	62.611	0.807692	6.55884	0.00379485	59.814	0.770565	5.35671	0.00269092	63.883	0.962659	14.1487	0.000400328	79.514		1	S	LTSLDTALAELRDNHSQADHSPLTTAAPFSR	X;X;X;X;X;X;X;X;X;X;X;X;X;X;X;Phospho (STY);X;X;X;X;X;X;X;X;X;X;X;X;X;X;X	XXXXXXXXXXXXPPPPPPPPPPPPPPPPPPP	0.000400328	79.514	62.611	_DNHS(ph)QADHSPLTTAAPFSR_	DNHS(0.975)QADHS(0.02)PLT(0.004)T(0.001)AAPFSR	DNHS(16.91)QADHS(-16.91)PLT(-24.19)T(-29.24)AAPFS(-44.34)R	4	3	711.311	0.62766	1.8849	1.8849	NaN	NaN	1.9727	1.9727	NaN	NaN	NaN
A2A5V4;P55194;A2A5V2;A2A5V3	262;182;262;262	A2A5V4	A2A5V4	SH3 domain-binding protein 1	Sh3bp1;Sh3bp1;Sh3bp1;Sh3bp1	>tr|A2A5V4|A2A5V4_MOUSE SH3 domain-binding protein 1 OS=Mus musculus GN=Sh3bp1 PE=4 SV=1;>sp|P55194|3BP1_MOUSE SH3 domain-binding protein 1 OS=Mus musculus GN=Sh3bp1 PE=1 SV=2;>tr|A2A5V2|A2A5V2_MOUSE SH3 domain-binding protein 1 OS=Mus musculus GN=Sh3bp1 P	0.991152	22.9519	0.991152	22.9519	0.00134547	70.174	0.979367	17.2128	9.17033e-05	96.848	0.969238	16.0429	0.00269092	63.883	0.986822	19.0666	3.81112e-05	107.56		1	S	TALAELRDNHSQADHSPLTTAAPFSRVYGVS	X;X;X;X;X;X;X;X;X;X;X;X;X;X;X;Phospho (STY);X;X;X;X;X;X;X;X;X;X;X;X;X;X;X	XXXXXXXPPPPPPPPPPPPPPPPPPPXXXXX	3.81112e-05	107.56	70.174	_DNHSQADHS(ph)PLTTAAPFSR_	DNHS(0.002)QADHS(0.991)PLT(0.005)T(0.002)AAPFSR	DNHS(-26.79)QADHS(22.95)PLT(-22.95)T(-27.59)AAPFS(-45.81)R	9	3	711.311	0.48201	1.9243	1.9243	NaN	NaN	1.8637	1.8637	NaN	NaN	NaN
A2A5V4;P55194;A2A5V2;A2A5V3	535;456;535;535	A2A5V4	A2A5V4	SH3 domain-binding protein 1	Sh3bp1;Sh3bp1;Sh3bp1;Sh3bp1	>tr|A2A5V4|A2A5V4_MOUSE SH3 domain-binding protein 1 OS=Mus musculus GN=Sh3bp1 PE=4 SV=1;>sp|P55194|3BP1_MOUSE SH3 domain-binding protein 1 OS=Mus musculus GN=Sh3bp1 PE=1 SV=2;>tr|A2A5V2|A2A5V2_MOUSE SH3 domain-binding protein 1 OS=Mus musculus GN=Sh3bp1 P	0.968218	14.9805	0.92296	10.7847	5.51632e-16	174.59	0.848566	7.48463	0.000176969	112.8	0.968218	14.9805	1.02456e-09	143.02	0.940052	11.9538	5.49959e-16	174.62		1	S	MAVRERTEADLPKPTSPKVSRNPTETAASAE	X;X;X;X;X;X;X;X;X;X;X;X;X;X;X;Phospho (STY);X;X;X;X;X;X;X;X;X;X;X;X;X;X;X	XXXXPPPPPPPPPPPPPPXXXXXXXXXXXXX	5.49959e-16	174.62	39.91	_ERTEADLPKPTS(ph)PK_	ERT(0.001)EADLPKPT(0.031)S(0.968)PK	ERT(-29.75)EADLPKPT(-14.98)S(14.98)PK	12	3	550.27	0.10787	0.77473	0.77473	NaN	NaN	0.88515	0.88515	NaN	NaN	NaN
A2A5V4;P55194	632;553	A2A5V4	A2A5V4	SH3 domain-binding protein 1	Sh3bp1;Sh3bp1	>tr|A2A5V4|A2A5V4_MOUSE SH3 domain-binding protein 1 OS=Mus musculus GN=Sh3bp1 PE=4 SV=1;>sp|P55194|3BP1_MOUSE SH3 domain-binding protein 1 OS=Mus musculus GN=Sh3bp1 PE=1 SV=2	0.99211	20.995					0.989463	19.7267	3.04448e-17	123.55					0.99211	20.995	3.15233e-21	103.4		1	S	VPPQPARRQSRRLPASPVISNMPAQVDQGVA	X;X;X;X;X;X;X;X;X;X;X;X;X;X;X;Phospho (STY);X;X;X;X;X;X;X;X;X;X;X;X;X;X;X	XXXXXXXXXXXPPPPPPPPPPPPPPPPPPPP	3.15233e-21	123.55	103.4	_RLPAS(ph)PVISNMPAQVDQGVATEDR_	RLPAS(0.992)PVIS(0.008)NMPAQVDQGVATEDR	RLPAS(20.99)PVIS(-20.99)NMPAQVDQGVAT(-87.63)EDR	5	3	877.758	-0.56707	0.73401	0.73401	NaN	NaN	0.93108	0.93108	NaN	NaN	0.93804
A2A5V4;P55194	636;557	A2A5V4	A2A5V4	SH3 domain-binding protein 1	Sh3bp1;Sh3bp1	>tr|A2A5V4|A2A5V4_MOUSE SH3 domain-binding protein 1 OS=Mus musculus GN=Sh3bp1 PE=4 SV=1;>sp|P55194|3BP1_MOUSE SH3 domain-binding protein 1 OS=Mus musculus GN=Sh3bp1 PE=1 SV=2	0.572208	1.26321					0.572208	1.26321	7.64502e-10	80.303										1	S	PARRQSRRLPASPVISNMPAQVDQGVATEDR	X;X;X;X;X;X;X;X;X;X;X;X;X;X;X;Phospho (STY);X;X;X;X;X;X;X;X;X;X;X;X;X;X;X	XXXXXXXPPPPPPPPPPPPPPPPPPPPPPPP	7.64502e-10	80.303	77.681	_RLPASPVIS(ph)NMPAQVDQGVATEDR_	RLPAS(0.428)PVIS(0.572)NMPAQVDQGVATEDR	RLPAS(-1.26)PVIS(1.26)NMPAQVDQGVAT(-68.78)EDR	9	3	877.758	0.22587	0.69838	0.69838	NaN	NaN	0.94501	0.94501	NaN	NaN	0.93804
A2A5V4;P55194	576;497	A2A5V4	A2A5V4	SH3 domain-binding protein 1	Sh3bp1;Sh3bp1	>tr|A2A5V4|A2A5V4_MOUSE SH3 domain-binding protein 1 OS=Mus musculus GN=Sh3bp1 PE=4 SV=1;>sp|P55194|3BP1_MOUSE SH3 domain-binding protein 1 OS=Mus musculus GN=Sh3bp1 PE=1 SV=2	0.495883	0													0.495883	0	9.61755e-11	113.31			S	PARPTMPPPQPSSTRSSPPAPSLPPGSVSPG	X;X;X;X;X;X;X;X;X;X;X;X;X;X;X;Phospho (STY);X;X;X;X;X;X;X;X;X;X;X;X;X;X;X	XXXXXXXXXXXXXXXPPPPPPPPPPPPPPPP	9.61755e-11	113.31	113.31	_S(ph)SPPAPSLPPGSVSPGTPQALPR_	S(0.496)S(0.496)PPAPS(0.008)LPPGSVSPGTPQALPR	S(0)S(0)PPAPS(-17.81)LPPGS(-43.47)VS(-55.04)PGT(-55.57)PQALPR	1	2	1139.07	-0.21279
A2A5V4;P55194	577;498	A2A5V4	A2A5V4	SH3 domain-binding protein 1	Sh3bp1;Sh3bp1	>tr|A2A5V4|A2A5V4_MOUSE SH3 domain-binding protein 1 OS=Mus musculus GN=Sh3bp1 PE=4 SV=1;>sp|P55194|3BP1_MOUSE SH3 domain-binding protein 1 OS=Mus musculus GN=Sh3bp1 PE=1 SV=2	0.495883	0													0.495883	0	9.61755e-11	113.31			S	ARPTMPPPQPSSTRSSPPAPSLPPGSVSPGT	X;X;X;X;X;X;X;X;X;X;X;X;X;X;X;X;X;X;X;X;X;X;X;X;X;X;X;X;X;X;X	XXXXXXXXXXXXXXXXXXXXXXXXXXXXXXX	9.61755e-11	113.31	113.31	_S(ph)SPPAPSLPPGSVSPGTPQALPR_	S(0.496)S(0.496)PPAPS(0.008)LPPGSVSPGTPQALPR	S(0)S(0)PPAPS(-17.81)LPPGS(-43.47)VS(-55.04)PGT(-55.57)PQALPR	2	2	1139.07	-0.21279
A2A5Y4;Q80TG1;Q80TG1-5	1076;1013;243	A2A5Y4	A2A5Y4	KAT8 regulatory NSL complex subunit 1	1700081L11Rik;Kansl1	>tr|A2A5Y4|A2A5Y4_MOUSE KAT8 regulatory NSL complex subunit 1 OS=Mus musculus GN=Kansl1 PE=4 SV=1;>sp|Q80TG1|KANL1_MOUSE KAT8 regulatory NSL complex subunit 1 OS=Mus musculus GN=Kansl1 PE=1 SV=1;>sp|Q80TG1-5|KANL1_MOUSE Isoform 5 of KAT8 regulatory NSL com	0.937141	11.7344	0.937141	11.7344	6.00718e-05	123.08					0.560304	1.05271	0.00255944	92.8						1	S	TSGSKTGREAEVAPTSPPVVPLKSRHLAATV	X;X;X;X;X;X;X;X;X;X;X;X;X;X;X;Phospho (STY);X;X;X;X;X;X;X;X;X;X;X;X;X;X;X	XXXXXXXXPPPPPPPPPPPPPPPXXXXXXXX	6.00718e-05	123.08	123.08	_EAEVAPTS(ph)PPVVPLK_	EAEVAPT(0.063)S(0.937)PPVVPLK	EAEVAPT(-11.73)S(11.73)PPVVPLK	8	2	807.413	0.1491	0.83199	0.83199	NaN	NaN	1.0814	1.0814	NaN	NaN	NaN
A2A654;A2A655;E9Q6A7	1302;1239;1187	A2A654	A2A654		Bptf;Bptf;Bptf	>tr|A2A654|A2A654_MOUSE Bromodomain PHD finger transcription factor OS=Mus musculus GN=Bptf PE=4 SV=1;>tr|A2A655|A2A655_MOUSE Bromodomain PHD finger transcription factor OS=Mus musculus GN=Bptf PE=4 SV=1;>tr|E9Q6A7|E9Q6A7_MOUSE Protein Bptf OS=Mus musculus	1	67.2998	0.999762	36.2381	5.34169e-44	180.52	0.999906	40.2798	7.53184e-44	179.17	1	67.2998	1.55227e-55	190.85	1	63.5817	5.36273e-67	211.75		1	S	KPDPKDQVLDDVSIQSPGPNCQRQNSVESDL	X;X;X;X;X;X;X;X;X;X;X;X;X;X;X;Phospho (STY);X;X;X;X;X;X;X;X;X;Phospho (STY);X;X;X;X;X	XXXXXPPPPPPPPPPPPPPPPPPXXXXXXXX	5.36273e-67	211.75	190.85	_DQVLDDVSIQS(ph)PGPNCQR_	DQVLDDVSIQS(1)PGPNCQR	DQVLDDVS(-67.3)IQS(67.3)PGPNCQR	11	2	1054.46	0.046915	0.82268	0.82268	NaN	NaN	0.82388	0.82388	NaN	NaN	NaN
A2A654;A2A655;E9Q6A7	1133;1070;1018	A2A654	A2A654		Bptf;Bptf;Bptf	>tr|A2A654|A2A654_MOUSE Bromodomain PHD finger transcription factor OS=Mus musculus GN=Bptf PE=4 SV=1;>tr|A2A655|A2A655_MOUSE Bromodomain PHD finger transcription factor OS=Mus musculus GN=Bptf PE=4 SV=1;>tr|E9Q6A7|E9Q6A7_MOUSE Protein Bptf OS=Mus musculus	1	66.6919	1	111.607	0.00123326	111.61	1	80.2312	0.00427868	97.635	1	86.0142	0.00861321	86.014	1	66.6919	0.00999407	83.045		1	S	KEPEKKDQDVKELLDSDNDKSFKEEPMEIDD	X;X;X;X;X;X;X;X;X;X;X;X;X;X;X;Phospho (STY);X;X;X;X;X;X;X;X;X;X;X;X;X;X;X	XXXXXXXXXXXPPPPPPPPPXXXXXXXXXXX	0.00123326	111.61	66.692	_ELLDS(ph)DNDK_	ELLDS(1)DNDK	ELLDS(66.69)DNDK	5	2	564.726	-0.79024	0.79173	0.79173	NaN	NaN	0.96981	0.96981	NaN	NaN	NaN
A2A654;A2A655;E9Q6A7	2264;2201;2149	A2A654	A2A654		Bptf;Bptf;Bptf	>tr|A2A654|A2A654_MOUSE Bromodomain PHD finger transcription factor OS=Mus musculus GN=Bptf PE=4 SV=1;>tr|A2A655|A2A655_MOUSE Bromodomain PHD finger transcription factor OS=Mus musculus GN=Bptf PE=4 SV=1;>tr|E9Q6A7|E9Q6A7_MOUSE Protein Bptf OS=Mus musculus	0.994053	22.2571					0.994053	22.2571	1.98139e-06	66.889					0.557644	1.01098	0.0115517	39.68		1	S	TPGAAAGPLQPSAPHSPRPQQGQVKLTMAQL	X;X;X;X;X;X;X;X;X;X;X;X;X;X;X;Phospho (STY);X;X;X;X;X;X;X;X;X;X;X;X;X;X;X	PPPPPPPPPPPPPPPPPPPPPPPPPXXXXXX	1.98139e-06	66.889	66.889	_GLTPGAAAGPLQPSAPHS(ph)PRPQQGQVK_	GLTPGAAAGPLQPS(0.006)APHS(0.994)PRPQQGQVK	GLT(-44.45)PGAAAGPLQPS(-22.26)APHS(22.26)PRPQQGQVK	18	3	909.796	-0.42694	0.44654	0.44654	NaN	NaN	0.55064	0.55064	NaN	NaN	NaN
A2A654;A2A655;E9Q6A7	1766;1703;1651	A2A654	A2A654		Bptf;Bptf;Bptf	>tr|A2A654|A2A654_MOUSE Bromodomain PHD finger transcription factor OS=Mus musculus GN=Bptf PE=4 SV=1;>tr|A2A655|A2A655_MOUSE Bromodomain PHD finger transcription factor OS=Mus musculus GN=Bptf PE=4 SV=1;>tr|E9Q6A7|E9Q6A7_MOUSE Protein Bptf OS=Mus musculus	0.995189	23.7005													0.995189	23.7005	0.000561169	87.16		1	S	TVTTTTTTVTKLSTPSPDTGVDTISVKEQSK	X;X;X;X;X;X;X;X;X;X;X;X;X;X;X;Phospho (STY);X;X;X;X;X;X;X;X;X;X;X;X;X;X;X	XXXXXXXXXXXPPPPPPPPPPPPPPPPXXXX	0.000561169	87.16	87.16	_LSTPS(ph)PDTGVDTISVK_	LSTPS(0.995)PDT(0.004)GVDTISVK	LS(-42.34)T(-35.39)PS(23.7)PDT(-23.7)GVDT(-37.45)IS(-43.83)VK	5	2	848.906	-0.24171	1.4897	1.4897	NaN	NaN	1.5225	1.5225	NaN	NaN	NaN
A2A654;A2A655;E9Q6A7	2462;2399;2347	A2A654	A2A654		Bptf;Bptf;Bptf	>tr|A2A654|A2A654_MOUSE Bromodomain PHD finger transcription factor OS=Mus musculus GN=Bptf PE=4 SV=1;>tr|A2A655|A2A655_MOUSE Bromodomain PHD finger transcription factor OS=Mus musculus GN=Bptf PE=4 SV=1;>tr|E9Q6A7|E9Q6A7_MOUSE Protein Bptf OS=Mus musculus	1	100.347	0.999983	47.8013	2.80878e-05	107.9	1	74.8934	3.48122e-63	190.85	0.999999	59.768	3.10897e-16	139.51	1	100.347	5.42531e-110	228.64		1	S	LVATQCQPQSSVQGQSPVRVQSPPLTRIRPS	X;X;X;X;X;X;X;X;X;X;X;X;X;X;X;Phospho (STY);X;X;X;X;X;Phospho (STY);X;X;X;X;X;X;X;X;X	PPPPPPPPPPPPPPPPPPPXXXXXXXXXXXX	5.42531e-110	228.64	228.64	_PLVATQCQPQSSVQGQS(ph)PVR_	PLVATQCQPQSSVQGQS(1)PVR	PLVAT(-188.35)QCQPQS(-112.19)S(-100.35)VQGQS(100.35)PVR	17	2	1124.03	0.10886	0.88013	0.88013	NaN	NaN	1.0277	1.0277	NaN	NaN	NaN
A2A654;A2A655;E9Q6A7	1312;1249;1197	A2A654	A2A654		Bptf;Bptf;Bptf	>tr|A2A654|A2A654_MOUSE Bromodomain PHD finger transcription factor OS=Mus musculus GN=Bptf PE=4 SV=1;>tr|A2A655|A2A655_MOUSE Bromodomain PHD finger transcription factor OS=Mus musculus GN=Bptf PE=4 SV=1;>tr|E9Q6A7|E9Q6A7_MOUSE Protein Bptf OS=Mus musculus	0.999509	33.0858	0.998334	27.7764	0.00182274	94.09	0.999509	33.0858	0.00264583	88.282					0.998647	28.6818	0.014225	60.255		1	S	DVSIQSPGPNCQRQNSVESDLDARISEPAGK	X;X;Phospho (STY);X;X;Phospho (STY);X;X;X;X;X;X;X;X;X;Phospho (STY);X;X;X;X;X;X;X;X;X;X;X;X;X;X;X	XXXXXXXXXXXXXPPPPPPPPPPPXXXXXXX	0.00182274	94.09	88.282	_QNS(ph)VESDLDAR_	QNS(1)VESDLDAR	QNS(33.09)VES(-33.09)DLDAR	3	2	657.272	0.23595	0.72037	0.72037	NaN	NaN	0.94948	0.94948	NaN	NaN	NaN
A2A654;A2A655;E9Q6A7;A2A652	2804;2741;2689;83	A2A654	A2A654		Bptf;Bptf;Bptf;Bptf	>tr|A2A654|A2A654_MOUSE Bromodomain PHD finger transcription factor OS=Mus musculus GN=Bptf PE=4 SV=1;>tr|A2A655|A2A655_MOUSE Bromodomain PHD finger transcription factor OS=Mus musculus GN=Bptf PE=4 SV=1;>tr|E9Q6A7|E9Q6A7_MOUSE Protein Bptf OS=Mus musculus	0.970231	16.3717									0.468621	1.52292	0.00611287	42.973	0.970231	16.3717	6.80714e-08	77.169		1	S	PVPAPAPAAPPAPPRSPPPSTHSLPPAGHPT	X;X;X;X;X;X;X;X;X;X;X;X;X;X;X;Phospho (STY);X;X;X;X;X;X;X;X;X;X;X;X;X;X;X	XXXXXXXXXXXXXXXPPPPPPPPPPPPPPPP	6.80714e-08	77.169	77.169	_S(ph)PPPSTHSLPPAGHPTAPLPVTSQK_	S(0.97)PPPS(0.022)T(0.007)HSLPPAGHPTAPLPVTSQK	S(16.37)PPPS(-16.37)T(-21.32)HS(-36.23)LPPAGHPT(-63.06)APLPVT(-66.7)S(-69.32)QK	1	3	861.099	-0.23562	0.87888	0.87888	NaN	NaN	0.86186	0.86186	NaN	NaN	NaN
A2A654;A2A655;E9Q6A7;A2A652	2808;2745;2693;87	A2A654	A2A654		Bptf;Bptf;Bptf;Bptf	>tr|A2A654|A2A654_MOUSE Bromodomain PHD finger transcription factor OS=Mus musculus GN=Bptf PE=4 SV=1;>tr|A2A655|A2A655_MOUSE Bromodomain PHD finger transcription factor OS=Mus musculus GN=Bptf PE=4 SV=1;>tr|E9Q6A7|E9Q6A7_MOUSE Protein Bptf OS=Mus musculus	0.358049	0					0.358049	0	1.10498e-08	79.382											S	PAPAAPPAPPRSPPPSTHSLPPAGHPTAPLP	X;X;X;X;X;X;X;X;X;X;X;X;X;X;X;Phospho (STY);X;X;X;X;X;X;X;X;X;X;X;X;X;X;X	XXXXXXXXXXXPPPPPPPPPPPPPPPPPPPP	1.10498e-08	79.382	79.382	_SPPPS(ph)THSLPPAGHPTAPLPVTSQK_	S(0.268)PPPS(0.358)T(0.358)HS(0.016)LPPAGHPTAPLPVTSQK	S(-1.25)PPPS(0)T(0)HS(-13.58)LPPAGHPT(-71.81)APLPVT(-77.66)S(-79.12)QK	5	3	861.099	-0.22401
A2A690-2;A2A690;F6VP19	1531;1521;664	A2A690-2	A2A690-2	Protein TANC2	Tanc2;Tanc2	>sp|A2A690-2|TANC2_MOUSE Isoform 2 of Protein TANC2 OS=Mus musculus GN=Tanc2;>sp|A2A690|TANC2_MOUSE Protein TANC2 OS=Mus musculus GN=Tanc2 PE=1 SV=1;>tr|F6VP19|F6VP19_MOUSE Protein TANC2 (Fragment) OS=Mus musculus GN=Tanc2 PE=4 SV=1	1	82.8324	1	71.043	0.00424544	77.062	1	72.5103	0.00434775	76.728	1	82.8324	0.00262159	88.552	0.955032	13.2711	0.0610865	44.457		1	S	PPHTSPAHQGASYRFSPPPVGGQSKEYPSPP	X;X;X;X;X;X;X;X;X;X;X;X;X;X;X;Phospho (STY);X;X;X;X;X;X;X;X;X;X;X;X;X;X;X	XXXXXXXXXXXXXXPPPPPPPPPPPXXXXXX	0.00262159	88.552	88.552	_FS(ph)PPPVGGQSK_	FS(1)PPPVGGQSK	FS(82.83)PPPVGGQS(-82.83)K	2	2	590.774	0.18189	1.1357	1.1357	NaN	NaN	1.133	1.133	NaN	NaN	NaN
A2A690-2;A2A690	404;404	A2A690-2	A2A690-2	Protein TANC2	Tanc2	>sp|A2A690-2|TANC2_MOUSE Isoform 2 of Protein TANC2 OS=Mus musculus GN=Tanc2;>sp|A2A690|TANC2_MOUSE Protein TANC2 OS=Mus musculus GN=Tanc2 PE=1 SV=1	0.939148	11.9282					0.939148	11.9282	0.000740907	87.667										1	S	HGTRMRQIASDSPHASPKHVDANRELPLTQA	X;X;X;X;X;X;X;X;X;X;X;X;X;X;X;Phospho (STY);X;X;X;X;X;X;X;X;X;X;X;X;X;X;X	XXXXXXPPPPPPPPPPPPXXXXXXXXXXXXX	0.000740907	87.667	87.667	_QIASDSPHAS(ph)PK_	QIAS(0.001)DS(0.06)PHAS(0.939)PK	QIAS(-31.89)DS(-11.93)PHAS(11.93)PK	10	2	659.295	-0.32156	0.77624	0.77624	NaN	NaN	0.99221	0.99221	NaN	NaN	NaN
A2A699;A2A699-2	409;225	A2A699	A2A699	Protein FAM171A2	Fam171a2	>sp|A2A699|F1712_MOUSE Protein FAM171A2 OS=Mus musculus GN=Fam171a2 PE=2 SV=1;>sp|A2A699-2|F1712_MOUSE Isoform 2 of Protein FAM171A2 OS=Mus musculus GN=Fam171a2	0.846052	7.40023	0.846052	7.40023	0.010132	65.472	0.825437	6.74731	0.00129422	97.86	0.5	0	0.00650286	70.438	0.837145	7.10998	0.00348279	80.312		1	S	PGSLHSAFSSSRDLASSRDDFFRAKPRSASR	X;X;X;X;X;X;X;X;X;X;X;X;X;X;X;Phospho (STY);X;X;X;X;X;X;X;X;X;X;X;X;X;X;X	XXXXXXXXXXXXPPPPPPPPPPPXXXXXXXX	0.00129422	97.86	65.472	_DLAS(ph)SRDDFFR_	DLAS(0.846)S(0.154)RDDFFR	DLAS(7.4)S(-7.4)RDDFFR	4	2	704.798	0.51431	1.7544	1.7544	NaN	NaN	2.3142	2.3142	NaN	NaN	NaN
A2A699;A2A699-2	410;226	A2A699	A2A699	Protein FAM171A2	Fam171a2	>sp|A2A699|F1712_MOUSE Protein FAM171A2 OS=Mus musculus GN=Fam171a2 PE=2 SV=1;>sp|A2A699-2|F1712_MOUSE Isoform 2 of Protein FAM171A2 OS=Mus musculus GN=Fam171a2	0.801706	6.06707	0.5	0	0.0976886	39.848	0.801706	6.06707	0.00129422	97.86	0.5	0	0.00650286	70.438	0.616317	2.05831	0.00265438	89.231		1	S	GSLHSAFSSSRDLASSRDDFFRAKPRSASRP	X;X;X;X;X;X;X;X;X;X;X;X;X;X;X;Phospho (STY);X;X;X;X;X;X;X;X;X;X;X;X;X;X;X	XXXXXXXXXXXPPPPPPPPPPPXXXXXXXXX	0.00129422	97.86	67.234	_DLASS(ph)RDDFFR_	DLAS(0.198)S(0.802)RDDFFR	DLAS(-6.07)S(6.07)RDDFFR	5	2	704.798	0.58978	1.9838	1.9838	NaN	NaN	2.504	2.504	NaN	NaN	NaN
A2A6A1	1013	A2A6A1	A2A6A1	G patch domain-containing protein 8	Gpatch8	>sp|A2A6A1|GPTC8_MOUSE G patch domain-containing protein 8 OS=Mus musculus GN=Gpatch8 PE=2 SV=1	1	65.3744	0.998396	27.9411	0.0193808	50.806	1	65.3744	0.0249617	65.374	1	81.6559	0.00047459	107.09	1	59.6726	0.000495051	88.338		1;2	S	RSTRSPSQRSGSRKGSWGHESPEERRSGRRD	X;X;X;X;X;X;X;X;X;X;X;X;X;X;X;Phospho (STY);X;X;X;X;Phospho (STY);X;X;X;X;X;X;X;X;X;X	XXXXXXXXXXXXXPPPPPPPPPPPPXXXXXX	0.00047459	107.09	65.374	_KGS(ph)WGHES(ph)PEER_	KGS(1)WGHES(1)PEER	KGS(65.37)WGHES(65.37)PEER	3	3	520.196	0.17342	0.78002	0.78002	1.3913	NaN	0.80741	0.80741	1.3778	NaN	NaN
A2A6A1	1018	A2A6A1	A2A6A1	G patch domain-containing protein 8	Gpatch8	>sp|A2A6A1|GPTC8_MOUSE G patch domain-containing protein 8 OS=Mus musculus GN=Gpatch8 PE=2 SV=1	1	65.3744	0.999975	46.0309	0.00289317	85.522	1	65.3744	0.00010648	139.78	1	81.6559	0.000336653	115.34	1	59.6726	6.98414e-05	143.25		1;2	S	PSQRSGSRKGSWGHESPEERRSGRRDFIRSK	X;X;X;X;X;X;X;X;X;X;Phospho (STY);X;X;X;X;Phospho (STY);X;X;X;X;X;X;X;X;X;X;X;X;X;X;X	XXXXXXXXPPPPPPPPPPPPXXXXXXXXXXX	6.98414e-05	143.25	65.374	_KGS(ph)WGHES(ph)PEER_	KGS(1)WGHES(1)PEER	KGS(65.37)WGHES(65.37)PEER	8	3	520.196	0.17342	0.82642	0.82642	1.3913	NaN	0.94198	0.94198	1.3778	NaN	NaN
A2A6A1	648	A2A6A1	A2A6A1	G patch domain-containing protein 8	Gpatch8	>sp|A2A6A1|GPTC8_MOUSE G patch domain-containing protein 8 OS=Mus musculus GN=Gpatch8 PE=2 SV=1	0.99206	20.9858	0.99206	20.9858	0.00034938	92.265	0.615081	2.12513	0.00322261	69.261	0.90215	12.0485	0.00457057	66.152	0.973299	15.7079	0.000234205	96.414		1	S	ACSSLNKQEPGGSHMSETEDTGRSHPSKKEP	X;X;X;X;X;X;X;X;X;X;X;X;X;X;Oxidation (M);Phospho (STY);X;X;X;X;X;X;X;X;X;X;X;X;X;X;X	XXXXXXXPPPPPPPPPPPPPPPPXXXXXXXX	0.000234205	96.414	92.265	_QEPGGSHMS(ph)ETEDTGR_	QEPGGSHMS(0.992)ET(0.008)EDTGR	QEPGGS(-45.95)HMS(20.99)ET(-20.99)EDT(-50.75)GR	9	2	899.341	0.17376	1.1872	1.1872	NaN	NaN	1.1095	1.1095	NaN	NaN	NaN
P19973-2;A2A6J4;P19973;A2A6J7	241;235;243;237	P19973-2	P19973-2	Lymphocyte-specific protein 1	Lsp1;Lsp1;Lsp1	>sp|P19973-2|LSP1_MOUSE Isoform 2 of Lymphocyte-specific protein 1 OS=Mus musculus GN=Lsp1;>tr|A2A6J4|A2A6J4_MOUSE Lymphocyte specific 1 OS=Mus musculus GN=Lsp1 PE=4 SV=1;>sp|P19973|LSP1_MOUSE Lymphocyte-specific protein 1 OS=Mus musculus GN=Lsp1 PE=1 SV=2	0.999994	52.4941	0.997581	26.2567	0.00516369	66.606	0.999982	47.536	0.000427121	96.143	0.999907	40.5682	0.0112847	58.723	0.999994	52.4941	0.000713432	89.911		1	S	ATESSGRTPKLSRQPSIELPSMAVASTKTLW	X;X;X;X;X;X;X;X;X;X;X;X;X;X;X;Phospho (STY);X;X;X;X;X;Oxidation (M);X;X;X;X;X;X;X;X;X	XXXXXXXXXXXXXPPPPPPPPPPPPPPPXXX	0.000427121	96.143	85.636	_QPS(ph)IELPSMAVASTK_	QPS(1)IELPSMAVASTK	QPS(52.49)IELPS(-52.49)MAVAS(-73.27)T(-73.27)K	3	2	819.894	0.51839	1.9218	1.9218	NaN	NaN	2.6233	2.6233	NaN	NaN	NaN
A2A6T1	407	A2A6T1	A2A6T1	Cerebellar degeneration-related protein 2-like	Cdr2l	>sp|A2A6T1|CDR2L_MOUSE Cerebellar degeneration-related protein 2-like OS=Mus musculus GN=Cdr2l PE=2 SV=1	1	168.104	1	95.2362	1.4392e-09	150.59	1	152.067	1.94707e-09	166.9	1	200.971	9.21344e-20	200.97	1	168.104	1.64416e-09	168.1		1	S	ISRDSSWRDLLGGEESPGEGKAGEKSLSQHV	X;X;X;X;X;X;X;X;X;X;X;X;X;X;X;Phospho (STY);X;X;X;X;X;X;X;X;X;X;X;X;X;X;X	XXXXXXXXPPPPPPPPPPPPPXXXXXXXXXX	9.21344e-20	200.97	168.1	_DLLGGEES(ph)PGEGK_	DLLGGEES(1)PGEGK	DLLGGEES(168.1)PGEGK	8	2	684.29	-0.81857	0.65534	0.65534	NaN	NaN	0.76826	0.76826	NaN	NaN	NaN
A2A6T1	179	A2A6T1	A2A6T1	Cerebellar degeneration-related protein 2-like	Cdr2l	>sp|A2A6T1|CDR2L_MOUSE Cerebellar degeneration-related protein 2-like OS=Mus musculus GN=Cdr2l PE=2 SV=1	0.991823	23.0241	0.866542	8.49134	0.00354448	104.41	0.893702	9.39042	0.000370328	110.92	0.862376	8.0898	0.000127443	149.69	0.991823	23.0241	0.000174392	151.7		1	S	LCTSSRCEDAFRLHSSSLELGPRPLEQENER	X;X;X;X;X;X;X;X;X;X;X;X;X;X;X;Phospho (STY);X;X;X;X;X;X;X;X;X;X;X;X;X;X;X	XXXXXXXXXXXXPPPPPPPPPPPPPPPPPPP	0.000174392	151.7	151.7	_LHSS(ph)SLELGPR_	LHS(0.005)S(0.992)S(0.003)LELGPR	LHS(-23.02)S(23.02)S(-24.87)LELGPR	4	2	638.308	0.82209	1.0684	1.0684	NaN	NaN	1.1435	1.1435	NaN	NaN	NaN
A2A6T1	318	A2A6T1	A2A6T1	Cerebellar degeneration-related protein 2-like	Cdr2l	>sp|A2A6T1|CDR2L_MOUSE Cerebellar degeneration-related protein 2-like OS=Mus musculus GN=Cdr2l PE=2 SV=1	0.974408	15.8901													0.974408	15.8901	4.64936e-06	128.06		1	S	SSPAASPSHAVRKSCSDTALNAIVAKDPASR	X;X;X;X;X;X;X;X;X;X;X;X;X;X;X;Phospho (STY);X;X;X;X;X;X;X;X;X;X;X;X;X;X;X	XXXXXXXXXXXXXPPPPPPPPPPPPPXXXXX	4.64936e-06	128.06	128.06	_SCS(ph)DTALNAIVAK_	S(0.025)CS(0.974)DTALNAIVAK	S(-15.89)CS(15.89)DT(-33)ALNAIVAK	3	2	715.323	-1.3425	0.8549	0.8549	NaN	NaN	0.84693	0.84693	NaN	NaN	NaN
A2A791;A2A791-2	121;121	A2A791	A2A791	Zinc finger MYM-type protein 4	Zmym4	>sp|A2A791|ZMYM4_MOUSE Zinc finger MYM-type protein 4 OS=Mus musculus GN=Zmym4 PE=1 SV=1;>sp|A2A791-2|ZMYM4_MOUSE Isoform 2 of Zinc finger MYM-type protein 4 OS=Mus musculus GN=Zmym4	1	150.763	1	78.2444	1.03192e-10	128.64	1	85.493	3.59336e-06	116.78	1	59.3449	0.00134044	70.197	1	150.763	1.34236e-20	150.76		1	S	TDGSLEVERRAAHQESDNENEIQIQNQLKKD	X;X;X;X;X;X;X;X;X;X;X;X;X;X;X;Phospho (STY);X;X;X;X;X;X;X;X;X;X;X;X;X;X;X	XXXXXXXXXXPPPPPPPPPPPPPPPPPPPXX	1.34236e-20	150.76	150.76	_AAHQES(ph)DNENEIQIQNQLK_	AAHQES(1)DNENEIQIQNQLK	AAHQES(150.76)DNENEIQIQNQLK	6	3	763.676	0.26675	0.66714	0.66714	NaN	NaN	0.93241	0.93241	NaN	NaN	NaN
A2A7B5	792	A2A7B5	A2A7B5		Prdm2	>tr|A2A7B5|A2A7B5_MOUSE PR domain containing 2, with ZNF domain OS=Mus musculus GN=Prdm2 PE=4 SV=1	0.81575	6.4615					0.81575	6.4615	0.000503882	90.759					0.659432	2.86979	0.0329214	49.188		1	S	SPAWSLSGRDERETGSPPCFDEYKISKEWAA	Phospho (STY);X;X;X;X;X;X;X;X;X;X;X;X;X;X;Phospho (STY);X;X;X;X;X;X;X;X;X;X;X;X;X;X;X	XXXXXXXXXXXXPPPPPPPPPPPPXXXXXXX	0.000503882	90.759	90.759	_ETGS(ph)PPCFDEYK_	ET(0.184)GS(0.816)PPCFDEYK	ET(-6.46)GS(6.46)PPCFDEY(-82.16)K	4	2	755.284	-0.56097	0.79546	0.79546	NaN	NaN	0.97679	0.97679	NaN	NaN	NaN
A2A7B5	638	A2A7B5	A2A7B5		Prdm2	>tr|A2A7B5|A2A7B5_MOUSE PR domain containing 2, with ZNF domain OS=Mus musculus GN=Prdm2 PE=4 SV=1	1	73.7095	0.999999	58.7752	0.00120588	111.86	0.99999	50.0399	0.000840071	115.18	0.999993	51.6548	0.00188361	107.06	1	73.7095	0.000396344	121.6		1	S	SPSSTNCESKKRRTASPPVLPKIKAETDSDS	X;X;X;X;X;X;X;X;X;X;X;X;X;X;X;Phospho (STY);X;X;X;X;X;X;X;X;X;X;X;X;X;X;X	XXXXXXXXXXXXXPPPPPPPPPXXXXXXXXX	0.000396344	121.6	121.6	_TAS(ph)PPVLPK_	TAS(1)PPVLPK	T(-73.71)AS(73.71)PPVLPK	3	2	495.257	-0.0053575	0.83103	0.83103	NaN	NaN	0.93166	0.93166	NaN	NaN	NaN
A2A7F4;E9Q532	631;521	A2A7F4	A2A7F4		Rlf;Rlf	>tr|A2A7F4|A2A7F4_MOUSE MCG122876 OS=Mus musculus GN=Rlf PE=4 SV=1;>tr|E9Q532|E9Q532_MOUSE Protein Rlf OS=Mus musculus GN=Rlf PE=4 SV=1	0.999812	37.2681	0.999052	30.2278	1.32537e-74	248.25	0.999812	37.2681	2.99702e-51	231.06	0.99851	28.2656	1.89439e-30	204.07	0.995299	23.259	2.23985e-61	239.55		1	S	KKLLLKSAQRGIYPKSPTGSLEQNPEQARGE	X;X;X;X;X;X;X;X;X;X;X;X;X;X;X;Phospho (STY);X;X;X;X;X;X;X;X;X;X;X;X;X;X;X	XXXXXXXXXXXXXXXPPPPPPPPPPPPPPXX	1.32537e-74	248.25	231.06	_S(ph)PTGSLEQNPEQAR_	S(1)PTGSLEQNPEQAR	S(37.27)PT(-37.27)GS(-80.16)LEQNPEQAR	1	2	797.349	-0.42576	0.90088	0.90088	NaN	NaN	0.96586	0.96586	NaN	NaN	NaN
A2A7S8-2	17	A2A7S8-2	A2A7S8-2			>sp|A2A7S8-2|K1522_MOUSE Isoform 2 of Uncharacterized protein KIAA1522 OS=Mus musculus GN=Kiaa1522	1	113.359													1	113.359	0.002559	113.36		1	S	AARAPPAAPAADEPGSPGGPPRRKKSRSGLR	X;X;X;X;X;X;X;X;X;X;X;X;X;X;X;Phospho (STY);X;X;X;X;X;X;X;X;X;X;X;X;X;X;X	XXXPPPPPPPPPPPPPPPPPPPXXXXXXXXX	0.002559	113.36	113.36	_APPAAPAADEPGS(ph)PGGPPR_	APPAAPAADEPGS(1)PGGPPR	APPAAPAADEPGS(113.36)PGGPPR	13	2	896.407	-2.0843	2.4899	2.4899	NaN	NaN	2.5726	2.5726	NaN	NaN	NaN
A2A7S8-2;A2A7S8-4;A2A7S8;A2A7S8-3	1009;964;952;839	A2A7S8-2;A2A7S8-3	A2A7S8-2	Uncharacterized protein KIAA1522	Kiaa1522	>sp|A2A7S8-2|K1522_MOUSE Isoform 2 of Uncharacterized protein KIAA1522 OS=Mus musculus GN=Kiaa1522;>sp|A2A7S8-4|K1522_MOUSE Isoform 4 of Uncharacterized protein KIAA1522 OS=Mus musculus GN=Kiaa1522;>sp|A2A7S8|K1522_MOUSE Uncharacterized protein KIAA1522 OS	1	66.1785	0.999991	52.113	0.00982881	96.059	1	66.1785	0.00094627	81.904	0.999999	61.7623	0.0036215	109.44						1	S	QKKPSKAPPPVARKPSVGVPPPSPSLPRTES	X;X;X;X;X;X;X;X;X;X;X;X;X;X;X;Phospho (STY);X;X;X;X;X;X;X;X;X;X;X;X;X;X;X	XXXXXXXXXXXXXPPPPPPPPPPPPPPPXXX	0.00094627	109.44	81.904	_KPS(ph)VGVPPPSPSLPR_	KPS(1)VGVPPPSPSLPR	KPS(66.18)VGVPPPS(-66.18)PS(-70.05)LPR	3	3	532.283	-0.1307	8.0976	8.0976	NaN	NaN	8.6042	8.6042	NaN	NaN	NaN
A2A7S8-2;A2A7S8-4;A2A7S8;A2A7S8-3	1016;971;959;846	A2A7S8-2;A2A7S8-3	A2A7S8-2	Uncharacterized protein KIAA1522	Kiaa1522	>sp|A2A7S8-2|K1522_MOUSE Isoform 2 of Uncharacterized protein KIAA1522 OS=Mus musculus GN=Kiaa1522;>sp|A2A7S8-4|K1522_MOUSE Isoform 4 of Uncharacterized protein KIAA1522 OS=Mus musculus GN=Kiaa1522;>sp|A2A7S8|K1522_MOUSE Uncharacterized protein KIAA1522 OS	0.939928	11.9442					0.939928	11.9442	0.000505304	90.654					0.874439	8.42896	0.00604471	60.949		1	S	PPPVARKPSVGVPPPSPSLPRTESLTAPSTN	X;X;X;X;X;X;X;X;X;X;X;X;X;X;X;Phospho (STY);X;X;X;X;X;X;X;X;X;X;X;X;X;X;X	XXXXXXPPPPPPPPPPPPPPPXXXXXXXXXX	0.000505304	90.654	90.385	_KPSVGVPPPS(ph)PSLPR_	KPSVGVPPPS(0.94)PS(0.06)LPR	KPS(-73.36)VGVPPPS(11.94)PS(-11.94)LPR	10	3	532.283	0.307	0.48921	0.48921	NaN	NaN	0.58193	0.58193	NaN	NaN	NaN
A2A7S8-2;A2A7S8-4;A2A7S8;A2A7S8-3	966;921;909;796	A2A7S8-2;A2A7S8-3	A2A7S8-2	Uncharacterized protein KIAA1522	Kiaa1522	>sp|A2A7S8-2|K1522_MOUSE Isoform 2 of Uncharacterized protein KIAA1522 OS=Mus musculus GN=Kiaa1522;>sp|A2A7S8-4|K1522_MOUSE Isoform 4 of Uncharacterized protein KIAA1522 OS=Mus musculus GN=Kiaa1522;>sp|A2A7S8|K1522_MOUSE Uncharacterized protein KIAA1522 OS	1	92.7725					1	75.2146	0.0146446	75.215	1	95.5698	8.27976e-05	95.57	1	92.7725	0.000110755	92.773		1	S	IFSKGTKKLQLERPVSPEAQADLQRNLVAEL	X;X;X;X;X;X;X;X;X;X;X;X;X;X;X;Phospho (STY);X;X;X;X;X;X;X;X;X;X;X;X;X;X;X	XXXXXXXXPPPPPPPPPPPPPPPPPXXXXXX	8.27976e-05	95.57	92.773	_LQLERPVS(ph)PEAQADLQR_	LQLERPVS(1)PEAQADLQR	LQLERPVS(92.77)PEAQADLQR	8	3	677.34	-0.22949	0.5147	0.5147	NaN	NaN	0.60466	0.60466	NaN	NaN	NaN
A2A837;Q542V3;Q8VE97;Q9D8S5;O35326;Q3TWW8	117;112;112;116;116;118	A2A837;Q9D8S5;Q3TWW8	Q3TWW8	Serine/arginine-rich splicing factor 4;Serine/arginine-rich splicing factor 5	Srsf4;Srsf4;Srsf4;Srsf5;Srsf5;Srsf6	>tr|A2A837|A2A837_MOUSE Serine/arginine-rich-splicing factor 4 OS=Mus musculus GN=Srsf4 PE=4 SV=1;>tr|Q542V3|Q542V3_MOUSE Serine/arginine-rich-splicing factor 4 OS=Mus musculus GN=Srsf4 PE=2 SV=1;>sp|Q8VE97|SRSF4_MOUSE Serine/arginine-rich splicing factor	0.948952	12.6926	0.700958	3.6996	0.0152058	108.9	0.948952	12.6926	1.0019e-40	186.46	0.69323	3.54064	0.00285071	103.08	0.948152	12.6214	0.0038771	172.8		1	S	APPVRTENRLIVENLSSRVSWQDLKDFMRQA;GPPTRTEYRLIVENLSSRCSWQDLKDYMRQA;GPPVRTEYRLIVENLSSRCSWQDLKDFMRQA	X;X;X;X;X;X;X;X;X;X;X;X;X;X;X;Phospho (STY);X;X;X;Phospho (STY);X;X;X;X;X;X;X;X;X;X;X	XXXXXXXXXPPPPPPPPPXXXXXXXXXXXXX	1.0019e-40	186.46	159.94	_LIVENLS(ph)SR_	LIVENLS(0.949)S(0.051)R	LIVENLS(12.69)S(-12.69)R	7	2	555.781	-0.1596	1.2629	1.2629	NaN	NaN	1.2331	1.2331	NaN	NaN	1.0971
A2A837;Q542V3;Q8VE97;Q9D8S5;O35326;Q3TWW8	118;113;113;117;117;119	A2A837;Q9D8S5;Q3TWW8	Q3TWW8	Serine/arginine-rich splicing factor 4;Serine/arginine-rich splicing factor 5	Srsf4;Srsf4;Srsf4;Srsf5;Srsf5;Srsf6	>tr|A2A837|A2A837_MOUSE Serine/arginine-rich-splicing factor 4 OS=Mus musculus GN=Srsf4 PE=4 SV=1;>tr|Q542V3|Q542V3_MOUSE Serine/arginine-rich-splicing factor 4 OS=Mus musculus GN=Srsf4 PE=2 SV=1;>sp|Q8VE97|SRSF4_MOUSE Serine/arginine-rich splicing factor	0.96322	14.1811	0.96322	14.1811	0.00363607	167.2	0.816949	6.49623	0.000209589	149.49	0.892435	9.18904	0.000801369	187.85	0.953123	13.0818	3.3589e-15	215.72		1	S	PPTRTEYRLIVENLSSRCSWQDLKDYMRQAG;PPVRTENRLIVENLSSRVSWQDLKDFMRQAG;PPVRTEYRLIVENLSSRCSWQDLKDFMRQAG	X;X;X;X;X;X;X;X;X;X;X;X;X;X;X;Phospho (STY);X;X;Phospho (STY);X;X;X;X;X;X;X;X;X;X;X;X	XXXXXXXXPPPPPPPPPXXXXXXXXXXXXXX	3.3589e-15	215.72	127.87	_LIVENLSS(ph)R_	LIVENLS(0.037)S(0.963)R	LIVENLS(-14.18)S(14.18)R	8	2	555.781	-0.16816	0.68198	0.68198	NaN	NaN	0.82324	0.82324	NaN	NaN	1.0971
A2A841;P48193;A2AD32;A2A838;A2A839;F7BUB8;O70318;Q9WV92-2;Q9WV92-5	669;658;644;467;473;50;610;563;563	A2A841;O70318;Q9WV92-2	O70318	Protein 4.1;Band 4.1-like protein 2	Epb4.1;Epb41;Epb4.1;Epb4.1;Epb4.1;Epb4.1;Epb41l2	>tr|A2A841|A2A841_MOUSE Erythrocyte protein band 4.1 OS=Mus musculus GN=Epb4.1 PE=4 SV=1;>sp|P48193|41_MOUSE Protein 4.1 OS=Mus musculus GN=Epb41 PE=1 SV=2;>tr|A2AD32|A2AD32_MOUSE Erythrocyte protein band 4.1 (Fragment) OS=Mus musculus GN=Epb4.1 PE=4 SV=1;	1	72.3155	1	174.589	2.48721e-08	180.64	1	72.3155	3.36839e-05	172.57	1	89.5064	0.000253897	155.1	1	110.347	0.00027738	128.74		1	S	KKRERLDGENIYIRHSNLMLEDLDKSQEEIK;KNTLRVDGDNIYVRHSNLMLEDLDKAQEAIL;SLIKRIKGENVYVKHSNLMLEDLDKTQDELM	X;X;X;X;X;X;X;X;X;X;X;Phospho (STY);X;X;X;Phospho (STY);X;X;Oxidation (M);X;X;X;X;X;X;X;X;X;X;X;X	XXXXXXXXXXXXXXPPPPPPPPPPPXXXXXX	2.48721e-08	180.64	72.315	_HS(ph)NLM(ox)LEDLDK_	HS(1)NLMLEDLDK	HS(72.32)NLMLEDLDK	2	2	705.802	0.055911	2.1279	2.1279	NaN	NaN	2.5716	2.5716	NaN	NaN	NaN
A2A870	206	A2A870	A2A870	Fas-binding factor 1	Fbf1	>sp|A2A870|FBF1_MOUSE Fas-binding factor 1 OS=Mus musculus GN=Fbf1 PE=1 SV=1	0.999999	62.6406	0.990133	20.0503	0.000935655	57.688	0.999996	54.0802	2.15292e-07	96.019	0.999999	62.6406	1.09085e-09	122.78	0.999891	39.621	4.6244e-13	131.04		1	S	TATKLPAVERKPAPKSPGAAAGQGPSVPLTP	X;X;X;X;X;X;X;X;X;X;X;X;X;X;X;Phospho (STY);X;X;X;X;X;X;X;X;X;X;X;X;X;X;X	XXXXXXXXXXXXXXXPPPPPPPPPPPPPPPP	4.6244e-13	131.04	122.78	_S(ph)PGAAAGQGPSVPLTPGDTPIR_	S(1)PGAAAGQGPSVPLTPGDTPIR	S(62.64)PGAAAGQGPS(-62.64)VPLT(-91.96)PGDT(-104.53)PIR	1	2	1063.52	0.087307	0.87641	0.87641	NaN	NaN	0.92669	0.92669	NaN	NaN	NaN
A2A8L5;F6S1X8;F6Y3V0	1290;713;672	A2A8L5	A2A8L5	Receptor-type tyrosine-protein phosphatase F	Ptprf;Ptprf;Ptprf	>sp|A2A8L5|PTPRF_MOUSE Receptor-type tyrosine-protein phosphatase F OS=Mus musculus GN=Ptprf PE=1 SV=1;>tr|F6S1X8|F6S1X8_MOUSE Receptor-type tyrosine-protein phosphatase F (Fragment) OS=Mus musculus GN=Ptprf PE=4 SV=1;>tr|F6Y3V0|F6Y3V0_MOUSE Receptor-type	1	91.5493	1	124.983	0.00161843	124.98	1	91.5493	0.00884166	91.549										1	S	FKRKRTHSPSSKDEQSIGLKDSLLAHSSDPV	X;X;X;X;X;X;X;X;X;X;X;X;X;X;X;Phospho (STY);X;X;X;X;X;X;X;X;X;X;X;X;X;X;X	XXXXXXXXXXXXPPPPPPPPXXXXXXXXXXX	0.00161843	124.98	91.549	_DEQS(ph)IGLK_	DEQS(1)IGLK	DEQS(91.55)IGLK	4	2	485.218	-0.41305	1.8316	1.8316	NaN	NaN	2.2025	2.2025	NaN	NaN	NaN
A2A8R0;A8Y5G5	640;640	A2A8R0	A2A8R0		Zfyve9;Zfyve9	>tr|A2A8R0|A2A8R0_MOUSE MCG17975 OS=Mus musculus GN=Zfyve9 PE=4 SV=1;>tr|A8Y5G5|A8Y5G5_MOUSE Protein Zfyve9 OS=Mus musculus GN=Zfyve9 PE=4 SV=1	1	223.499	1	259.137	2.01294e-96	259.14	1	142.941	4.80214e-55	225.01	1	185.849	9.70899e-26	185.85	1	223.499	6.77576e-67	237		1	S	EAEISSRPCLALAPDSPDNDLRASQFGISAR	X;X;X;X;X;X;X;X;X;X;X;X;X;X;X;Phospho (STY);X;X;X;X;X;X;X;X;X;X;X;X;X;X;X	XXXXXXXPPPPPPPPPPPPPPPXXXXXXXXX	2.01294e-96	259.14	223.5	_PCLALAPDS(ph)PDNDLR_	PCLALAPDS(1)PDNDLR	PCLALAPDS(223.5)PDNDLR	9	2	867.382	-0.12566	0.83876	0.83876	NaN	NaN	1.0493	1.0493	NaN	NaN	NaN
A2A8R7;B2RX14	176;176	A2A8R7	A2A8R7	Terminal uridylyltransferase 4	Zcchc11;Zcchc11	>tr|A2A8R7|A2A8R7_MOUSE Terminal uridylyltransferase 4 OS=Mus musculus GN=Zcchc11 PE=4 SV=1;>sp|B2RX14|TUT4_MOUSE Terminal uridylyltransferase 4 OS=Mus musculus GN=Zcchc11 PE=1 SV=2	1	156.992	1	76.2683	0.000896423	86.005	1	155.425	1.42223e-31	211.57	1	85.2129	0.000111302	119.47	1	156.992	7.3627e-24	193.77		1	S	ENTPTSQMKLQKTPRSPLEPENVPSLLLKEN	X;X;X;X;X;X;X;X;X;X;X;X;X;X;X;Phospho (STY);X;X;X;X;X;X;X;X;X;X;X;X;X;X;X	XXXXXXXXXXXXXXXPPPPPPPPPPPPPPXX	1.42223e-31	211.57	193.77	_S(ph)PLEPENVPSLLLK_	S(1)PLEPENVPSLLLK	S(156.99)PLEPENVPS(-156.99)LLLK	1	2	808.421	0.15738	0.45716	0.45716	NaN	NaN	0.61457	0.61457	NaN	NaN	NaN
A2A8R7;B2RX14	131;131	A2A8R7	A2A8R7	Terminal uridylyltransferase 4	Zcchc11;Zcchc11	>tr|A2A8R7|A2A8R7_MOUSE Terminal uridylyltransferase 4 OS=Mus musculus GN=Zcchc11 PE=4 SV=1;>sp|B2RX14|TUT4_MOUSE Terminal uridylyltransferase 4 OS=Mus musculus GN=Zcchc11 PE=1 SV=2	1	89.0474	1	51.9267	0.0390166	51.927	1	88.0206	0.0280872	120.12					1	89.0474	0.031825	120.99		1	S	EKTPSLQTKAEKVPKSPNLPVKAEKAPCTTA	X;X;X;X;X;X;X;X;X;X;X;X;X;X;X;Phospho (STY);X;X;X;X;X;X;X;X;X;X;X;X;X;X;X	XXXXXXXXXXXXPPPPPPPPPPXXXXXXXXX	0.00193945	120.99	89.047	_VPKS(ph)PNLPVK_	VPKS(1)PNLPVK	VPKS(89.05)PNLPVK	4	3	386.881	-0.6567	0.72886	0.72886	NaN	NaN	0.88771	0.88771	NaN	NaN	NaN
A2A8U2;A2A8U2-3	454;454	A2A8U2	A2A8U2	Transmembrane protein 201	Tmem201	>sp|A2A8U2|TM201_MOUSE Transmembrane protein 201 OS=Mus musculus GN=Tmem201 PE=2 SV=1;>sp|A2A8U2-3|TM201_MOUSE Isoform 3 of Transmembrane protein 201 OS=Mus musculus GN=Tmem201	0.999992	50.7722	0.999992	50.7722	0.00120979	83.499	0.999988	49.3969	0.00145602	81.311	0.999979	46.7149	9.55496e-05	106.42	0.999613	34.1345	0.000399153	93.478		1	S	RVSPSSLPGRLSRALSLGTIPPLTRTDSGYL	X;X;X;X;X;X;X;X;X;X;X;X;X;X;X;Phospho (STY);X;X;X;X;X;X;X;X;X;X;X;X;X;X;X	XXXXXXXXXXXXXPPPPPPPPPPPPXXXXXX	9.55496e-05	106.42	73.91	_ALS(ph)LGTIPPLTR_	ALS(1)LGTIPPLTR	ALS(50.77)LGT(-50.77)IPPLT(-69.55)R	3	2	659.86	0.39268	0.74751	0.74751	NaN	NaN	0.80407	0.80407	NaN	NaN	NaN
E9PUK6;A2A8V9;Q52KI8;A2A8V8;E9QKA4;Q52KI8-2	756;751;779;742;756;756	E9PUK6	E9PUK6	Serine/arginine repetitive matrix protein 1	Srrm1;Srrm1;Srrm1;Srrm1;Srrm1	>tr|E9PUK6|E9PUK6_MOUSE Serine/arginine repetitive matrix protein 1 OS=Mus musculus GN=Srrm1 PE=4 SV=1;>tr|A2A8V9|A2A8V9_MOUSE Serine/arginine repetitive matrix 1 OS=Mus musculus GN=Srrm1 PE=4 SV=1;>sp|Q52KI8|SRRM1_MOUSE Serine/arginine repetitive matrix p	1	75.3285	1	75.3285	3.52252e-15	196.67	1	69.502	4.20203e-05	171.26	0.999999	60.5831	8.96061e-07	179.65	0.999997	55.0649	7.31233e-06	168.76		1;2	S	RVSRTPEPKKIKKAASPSPQSVRRVSSSRSV	X;X;X;X;X;X;X;X;X;X;X;X;X;X;X;Phospho (STY);X;Phospho (STY);X;X;X;X;X;X;X;X;X;X;X;Phospho (STY);X	XXXXXXXXXXXXPPPPPPPPPPPXXXXXXXX	3.52252e-15	196.67	163.64	_KAAS(ph)PSPQSVR_	KAAS(1)PSPQSVR	KAAS(75.33)PS(-75.33)PQS(-106.23)VR	4	2	604.295	-0.14105	0.77465	0.77465	1.2639	NaN	0.98435	0.98435	1.3301	NaN	NaN
E9PUK6;A2A8V9;Q52KI8;A2A8V8;E9QKA4;Q52KI8-2	758;753;781;744;758;758	E9PUK6	E9PUK6	Serine/arginine repetitive matrix protein 1	Srrm1;Srrm1;Srrm1;Srrm1;Srrm1	>tr|E9PUK6|E9PUK6_MOUSE Serine/arginine repetitive matrix protein 1 OS=Mus musculus GN=Srrm1 PE=4 SV=1;>tr|A2A8V9|A2A8V9_MOUSE Serine/arginine repetitive matrix 1 OS=Mus musculus GN=Srrm1 PE=4 SV=1;>sp|Q52KI8|SRRM1_MOUSE Serine/arginine repetitive matrix p	0.992205	21.0478	0.947921	12.6024	0.016607	55.899	0.974062	17.722	0.0135229	103.26	0.992205	21.0478	6.66302e-05	127.56						1;2	S	SRTPEPKKIKKAASPSPQSVRRVSSSRSVSG	X;X;X;X;X;X;X;X;X;X;X;X;X;Phospho (STY);X;Phospho (STY);X;X;X;X;X;X;X;X;X;X;X;Phospho (STY);X;Phospho (STY);X	XXXXXXXXXXPPPPPPPPPPPXXXXXXXXXX	6.66302e-05	127.56	117.79	_AASPS(ph)PQSVR_	AASPS(0.992)PQS(0.008)VR	AAS(-75.07)PS(21.05)PQS(-21.05)VR	5	2	540.248	-0.31544	1.0356	1.0356	1.2639	NaN	1.1603	1.1603	1.3301	NaN	NaN
E9PUK6;A2A8V9;Q52KI8;A2A8V8;E9QKA4;Q52KI8-2;F7BWM1	260;260;260;260;260;260;50	E9PUK6	E9PUK6	Serine/arginine repetitive matrix protein 1	Srrm1;Srrm1;Srrm1;Srrm1;Srrm1;Srrm1	>tr|E9PUK6|E9PUK6_MOUSE Serine/arginine repetitive matrix protein 1 OS=Mus musculus GN=Srrm1 PE=4 SV=1;>tr|A2A8V9|A2A8V9_MOUSE Serine/arginine repetitive matrix 1 OS=Mus musculus GN=Srrm1 PE=4 SV=1;>sp|Q52KI8|SRRM1_MOUSE Serine/arginine repetitive matrix p	1	38.8891	1	38.8891	0.00106481	74.953	1	102.39	9.23942e-08	130.01	1	130.01	9.23942e-08	130.01	1	98.3905	4.47352e-05	98.391		1	S	LKAPKPEPVPEPKEPSPEKNSKKEKEKTRPR	X;X;X;X;X;X;X;X;X;X;X;X;X;X;X;Phospho (STY);X;X;X;X;X;X;X;X;X;X;X;X;X;X;X	XXPPPPPPPPPPPPPPPPPXXXXXXXXXXXX	9.23942e-08	130.01	38.889	_APKPEPVPEPKEPS(ph)PEK_	APKPEPVPEPKEPS(1)PEK	APKPEPVPEPKEPS(38.89)PEK	14	3	645.987	0.8322	0.72041	0.72041	NaN	NaN	0.79524	0.79524	NaN	NaN	NaN
E9PUK6;A2A8V9;Q52KI8;A2A8V8;E9QKA4;Q52KI8-2;F6UK16	713;708;713;699;713;713;159	E9PUK6	E9PUK6	Serine/arginine repetitive matrix protein 1	Srrm1;Srrm1;Srrm1;Srrm1;Srrm1;Srrm1	>tr|E9PUK6|E9PUK6_MOUSE Serine/arginine repetitive matrix protein 1 OS=Mus musculus GN=Srrm1 PE=4 SV=1;>tr|A2A8V9|A2A8V9_MOUSE Serine/arginine repetitive matrix 1 OS=Mus musculus GN=Srrm1 PE=4 SV=1;>sp|Q52KI8|SRRM1_MOUSE Serine/arginine repetitive matrix p	0.998634	28.7188	0.811287	6.33505	0.00025047	156.6	0.976985	16.2918	0.00025047	156.6	0.998634	28.7188	1.38341e-05	173.72	0.991509	20.6849	5.42976e-10	188.13		1	S	NKRHSPSPRPRAPQTSSPPPVRRGASASPQG	X;X;X;X;X;X;X;X;X;X;X;X;X;X;X;Phospho (STY);X;X;X;X;X;X;X;X;X;X;X;X;X;X;X	XXXXXXXXXXXPPPPPPPPPPPXXXXXXXXX	3.48519e-12	188.13	173.72	_APQTS(ph)SPPPVR_	APQTS(0.999)S(0.001)PPPVR	APQT(-46)S(28.72)S(-28.72)PPPVR	5	2	608.79	0.084682	1.052	1.052	NaN	NaN	1.0731	1.0731	NaN	NaN	NaN
E9PUK6;A2A8V9;Q52KI8;A2A8V8;E9QKA4;Q52KI8-2;F6UK16	714;709;714;700;714;714;160	E9PUK6	E9PUK6	Serine/arginine repetitive matrix protein 1	Srrm1;Srrm1;Srrm1;Srrm1;Srrm1;Srrm1	>tr|E9PUK6|E9PUK6_MOUSE Serine/arginine repetitive matrix protein 1 OS=Mus musculus GN=Srrm1 PE=4 SV=1;>tr|A2A8V9|A2A8V9_MOUSE Serine/arginine repetitive matrix 1 OS=Mus musculus GN=Srrm1 PE=4 SV=1;>sp|Q52KI8|SRRM1_MOUSE Serine/arginine repetitive matrix p	0.998616	28.5824	0.998543	28.3577	6.06409e-15	194.98	0.958298	13.6139	0.000136787	166.62	0.995565	23.512	3.36614e-05	172.57	0.998616	28.5824	0.000137081	166.6		1	S	KRHSPSPRPRAPQTSSPPPVRRGASASPQGR	X;X;X;X;X;X;X;X;X;X;X;X;X;X;X;Phospho (STY);X;X;X;X;X;X;X;X;X;X;X;X;X;X;X	XXXXXXXXXXPPPPPPPPPPPXXXXXXXXXX	6.06409e-15	194.98	166.6	_APQTSS(ph)PPPVR_	APQTS(0.001)S(0.999)PPPVR	APQT(-74.56)S(-28.58)S(28.58)PPPVR	6	2	608.79	-0.12342	0.68327	0.68327	NaN	NaN	0.93497	0.93497	NaN	NaN	NaN
E9PUK6;A2A8V9;Q52KI8;A2A8V8;E9QKA4;Q52KI8-2;F7BWM1	220;220;220;220;220;220;10	E9PUK6	E9PUK6	Serine/arginine repetitive matrix protein 1	Srrm1;Srrm1;Srrm1;Srrm1;Srrm1;Srrm1	>tr|E9PUK6|E9PUK6_MOUSE Serine/arginine repetitive matrix protein 1 OS=Mus musculus GN=Srrm1 PE=4 SV=1;>tr|A2A8V9|A2A8V9_MOUSE Serine/arginine repetitive matrix 1 OS=Mus musculus GN=Srrm1 PE=4 SV=1;>sp|Q52KI8|SRRM1_MOUSE Serine/arginine repetitive matrix p	1	136.579	1	114.464	6.95236e-08	177.63	1	87.5901	6.89428e-23	205.3	1	117.054	9.08253e-23	203.11	1	136.579	2.36797e-32	220.97		1	S	TKSRSPSPAPEKKEKSPELPEPSVRMKDSSV	X;X;X;X;X;X;X;X;X;X;X;X;X;X;X;Phospho (STY);X;X;X;X;X;X;X;X;X;Oxidation (M);X;X;X;X;X	XXXXXXXXXXXXPPPPPPPPPPPPPXXXXXX	2.36797e-32	220.97	172.17	_S(ph)PELPEPSVR_	S(1)PELPEPSVR	S(136.58)PELPEPS(-136.58)VR	1	2	595.776	0.084972	0.70421	0.70421	NaN	NaN	0.96921	0.96921	NaN	NaN	NaN
E9PUK6;A2A8V9;Q52KI8;A2A8V8;E9QKA4;Q52KI8-2	448;443;448;448;448;448	E9PUK6	E9PUK6	Serine/arginine repetitive matrix protein 1	Srrm1;Srrm1;Srrm1;Srrm1;Srrm1	>tr|E9PUK6|E9PUK6_MOUSE Serine/arginine repetitive matrix protein 1 OS=Mus musculus GN=Srrm1 PE=4 SV=1;>tr|A2A8V9|A2A8V9_MOUSE Serine/arginine repetitive matrix 1 OS=Mus musculus GN=Srrm1 PE=4 SV=1;>sp|Q52KI8|SRRM1_MOUSE Serine/arginine repetitive matrix p	1	63.2903	0.999392	32.1581	0.000206258	157.35	1	63.2903	8.4031e-05	148.48	0.992704	21.3373	0.000157568	128.96	0.999834	37.8029	1.85655e-05	173.25		1;2	S	TSGKVTKHKGTEKRESPSPAPKPRKVELSES	X;X;X;X;X;X;X;X;X;X;X;X;X;X;X;Phospho (STY);X;Phospho (STY);X;X;X;X;X;X;X;X;X;X;Phospho (STY);X;Phospho (STY)	XXXXXXXXXXXXXPPPPPPPPPPPXXXXXXX	1.85655e-05	173.25	63.29	_RES(ph)PS(ph)PAPKPR_	RES(1)PS(1)PAPKPR	RES(63.29)PS(63.29)PAPKPR	3	3	461.206	0.061421	0.64887	0.64887	0.20689	NaN	0.87447	0.87447	0.28879	NaN	NaN
E9PUK6;A2A8V9;Q52KI8;A2A8V8;E9QKA4;Q52KI8-2	450;445;450;450;450;450	E9PUK6	E9PUK6	Serine/arginine repetitive matrix protein 1	Srrm1;Srrm1;Srrm1;Srrm1;Srrm1	>tr|E9PUK6|E9PUK6_MOUSE Serine/arginine repetitive matrix protein 1 OS=Mus musculus GN=Srrm1 PE=4 SV=1;>tr|A2A8V9|A2A8V9_MOUSE Serine/arginine repetitive matrix 1 OS=Mus musculus GN=Srrm1 PE=4 SV=1;>sp|Q52KI8|SRRM1_MOUSE Serine/arginine repetitive matrix p	1	63.2903	0.920876	10.6589	0.0138624	66.435	1	63.2903	0.00114517	97.203	0.5	0	0.0044311	73.885						1;2	S	GKVTKHKGTEKRESPSPAPKPRKVELSESEE	X;X;X;X;X;X;X;X;X;X;X;X;X;Phospho (STY);X;Phospho (STY);X;X;X;X;X;X;X;X;X;X;Phospho (STY);X;Phospho (STY);X;X	XXXXXXXXXXXPPPPPPPPPPPXXXXXXXXX	0.00114517	97.203	63.29	_RES(ph)PS(ph)PAPKPR_	RES(1)PS(1)PAPKPR	RES(63.29)PS(63.29)PAPKPR	5	3	461.206	0.061421	0.45963	0.45963	0.20689	NaN	0.66396	0.66396	0.28879	NaN	NaN
E9PUK6;A2A8V9;Q52KI8;A2A8V8;E9QKA4;Q52KI8-2	400;395;400;400;400;400	E9PUK6	E9PUK6	Serine/arginine repetitive matrix protein 1	Srrm1;Srrm1;Srrm1;Srrm1;Srrm1	>tr|E9PUK6|E9PUK6_MOUSE Serine/arginine repetitive matrix protein 1 OS=Mus musculus GN=Srrm1 PE=4 SV=1;>tr|A2A8V9|A2A8V9_MOUSE Serine/arginine repetitive matrix 1 OS=Mus musculus GN=Srrm1 PE=4 SV=1;>sp|Q52KI8|SRRM1_MOUSE Serine/arginine repetitive matrix p	0.988485	19.2863	0.90251	9.65579	1.43236e-06	175.26	0.959945	12.9752	2.84473e-05	160.04	0.988485	19.2863	7.01757e-05	108.97	0.973927	13.79	1.43236e-06	175.26		1;2	S	RLSPSASPPRRRHRPSSPATPPPKTRHSPTP	X;X;Phospho (STY);X;Phospho (STY);X;Phospho (STY);X;X;X;X;X;X;X;X;Phospho (STY);Phospho (STY);X;X;Phospho (STY);X;X;X;X;X;X;X;Phospho (STY);X;X;X	XXXXXXXXXXXXPPPPPPPPPPPPXXXXXXX	3.54933e-15	175.26	83.823	_HRPS(ph)S(ph)PATPPPK_	HRPS(0.988)S(0.988)PAT(0.023)PPPK	HRPS(19.29)S(19.29)PAT(-19.29)PPPK	4	2	716.313	0.18013	0.64226	0.64226	0.65052	NaN	0.74245	0.74245	0.88185	NaN	NaN
E9PUK6;A2A8V9;Q52KI8;A2A8V8;E9QKA4;Q52KI8-2	401;396;401;401;401;401	E9PUK6	E9PUK6	Serine/arginine repetitive matrix protein 1	Srrm1;Srrm1;Srrm1;Srrm1;Srrm1	>tr|E9PUK6|E9PUK6_MOUSE Serine/arginine repetitive matrix protein 1 OS=Mus musculus GN=Srrm1 PE=4 SV=1;>tr|A2A8V9|A2A8V9_MOUSE Serine/arginine repetitive matrix 1 OS=Mus musculus GN=Srrm1 PE=4 SV=1;>sp|Q52KI8|SRRM1_MOUSE Serine/arginine repetitive matrix p	0.995273	23.2336	0.992494	21.2131	2.69827e-05	147.56	0.90092	9.57764	2.84473e-05	160.04	0.988485	19.2863	8.0657e-05	161.24	0.995273	23.2336	1.26654e-06	176.25		1;2	S	LSPSASPPRRRHRPSSPATPPPKTRHSPTPQ	X;Phospho (STY);X;Phospho (STY);X;Phospho (STY);X;X;X;X;X;X;X;X;Phospho (STY);Phospho (STY);X;X;Phospho (STY);X;X;X;X;X;X;X;Phospho (STY);X;X;X;X	XXXXXXXXXXXPPPPPPPPPPPPXXXXXXXX	1.26654e-06	176.25	114.31	_HRPSS(ph)PAT(ph)PPPK_	HRPS(0.005)S(0.995)PAT(1)PPPK	HRPS(-23.23)S(23.23)PAT(59.11)PPPK	5	3	477.878	-0.29858	0.62329	0.62329	1.0034	NaN	0.85401	0.85401	0.97405	NaN	NaN
E9PUK6;A2A8V9;Q52KI8;A2A8V8	892;887;915;878	E9PUK6	E9PUK6	Serine/arginine repetitive matrix protein 1	Srrm1;Srrm1;Srrm1;Srrm1	>tr|E9PUK6|E9PUK6_MOUSE Serine/arginine repetitive matrix protein 1 OS=Mus musculus GN=Srrm1 PE=4 SV=1;>tr|A2A8V9|A2A8V9_MOUSE Serine/arginine repetitive matrix 1 OS=Mus musculus GN=Srrm1 PE=4 SV=1;>sp|Q52KI8|SRRM1_MOUSE Serine/arginine repetitive matrix p	1	201.975					1	222.214	1.04439e-146	272.51	1	205.015	3.67827e-71	225.27	1	201.975	2.86622e-48	201.97		1;2	S	QEEPAAAPEPRKETESEAEDDNLDDLERHLR	X;X;X;X;X;X;X;X;X;X;X;X;X;Phospho (STY);X;Phospho (STY);X;X;X;X;X;X;X;X;X;X;X;X;X;X;X	XXXXXXXXXXXPPPPPPPPPPPPPPPPPXXX	1.04439e-146	272.51	201.97	_KET(ph)ES(ph)EAEDDNLDDLER_	KET(1)ES(1)EAEDDNLDDLER	KET(201.97)ES(201.97)EAEDDNLDDLER	5	2	1084.4	0.36189	0.78036	0.78036	0.98832	NaN	0.89139	0.89139	1.0355	NaN	NaN
E9PUK6;A2A8V9;Q52KI8;A2A8V8;E9QKA4;Q52KI8-2;F6UK16	787;782;810;773;787;787;217	E9PUK6	E9PUK6	Serine/arginine repetitive matrix protein 1	Srrm1;Srrm1;Srrm1;Srrm1;Srrm1;Srrm1	>tr|E9PUK6|E9PUK6_MOUSE Serine/arginine repetitive matrix protein 1 OS=Mus musculus GN=Srrm1 PE=4 SV=1;>tr|A2A8V9|A2A8V9_MOUSE Serine/arginine repetitive matrix 1 OS=Mus musculus GN=Srrm1 PE=4 SV=1;>sp|Q52KI8|SRRM1_MOUSE Serine/arginine repetitive matrix p	0.999918	40.7668	0.998528	32.0537	1.10563e-14	92.788	0.999711	35.5087	8.32064e-17	112.36	0.995159	22.7683	2.52764e-16	114.63	0.999918	40.7668	1.26634e-16	116.28		1;2;3	S	SGSPEPAAKKPPAPPSPVQSQSPSTNWSPAV	Phospho (STY);X;Phospho (STY);X;X;X;X;X;X;X;X;X;X;X;X;Phospho (STY);X;X;X;Phospho (STY);X;Phospho (STY);X;Phospho (STY);Phospho (STY);X;X;Phospho (STY);X;X;X	XXXXXXXXXPPPPPPPPPPPPPPPPPPPPPP	8.32064e-17	116.28	101.49	_KPPAPPS(ph)PVQS(ph)QSPSTNWSPAVPAK_	KPPAPPS(1)PVQS(0.949)QS(0.05)PSTNWSPAVPAK	KPPAPPS(40.77)PVQS(12.83)QS(-12.83)PS(-34.13)T(-34.13)NWS(-33.13)PAVPAK	7	3	905.757	-0.10019	0.7782	0.7782	0.73349	0.77656	0.85177	0.85177	0.93476	0.93724	NaN
E9PUK6;A2A8V9;Q52KI8;A2A8V8;E9QKA4;Q52KI8-2;F6UK16	791;786;814;777;791;791;221	E9PUK6	E9PUK6	Serine/arginine repetitive matrix protein 1	Srrm1;Srrm1;Srrm1;Srrm1;Srrm1;Srrm1	>tr|E9PUK6|E9PUK6_MOUSE Serine/arginine repetitive matrix protein 1 OS=Mus musculus GN=Srrm1 PE=4 SV=1;>tr|A2A8V9|A2A8V9_MOUSE Serine/arginine repetitive matrix 1 OS=Mus musculus GN=Srrm1 PE=4 SV=1;>sp|Q52KI8|SRRM1_MOUSE Serine/arginine repetitive matrix p	0.949293	12.8267					0.643934	1.51415	2.88587e-10	83.436	0.855901	7.70363	1.24703e-06	70.315	0.949293	12.8267	1.28536e-16	109.32		1;2;3	S	EPAAKKPPAPPSPVQSQSPSTNWSPAVPAKK	X;X;X;X;X;X;X;X;X;X;X;Phospho (STY);X;X;X;Phospho (STY);X;Phospho (STY);X;X;X;X;X;Phospho (STY);X;X;X;X;X;X;X	XXXXXPPPPPPPPPPPPPPPPPPPPPPPPPX	1.28536e-16	109.32	101.49	_KPPAPPS(ph)PVQS(ph)QSPSTNWSPAVPAK_	KPPAPPS(1)PVQS(0.949)QS(0.05)PSTNWSPAVPAK	KPPAPPS(40.77)PVQS(12.83)QS(-12.83)PS(-34.13)T(-34.13)NWS(-33.13)PAVPAK	11	3	905.757	-0.10019	1.3296	1.3296	1.0598	0.78195	1.2419	1.2419	0.99143	0.9771	NaN
E9PUK6;A2A8V9;Q52KI8;A2A8V8;E9QKA4;Q52KI8-2;F6UK16	793;788;816;779;793;793;223	E9PUK6	E9PUK6	Serine/arginine repetitive matrix protein 1	Srrm1;Srrm1;Srrm1;Srrm1;Srrm1;Srrm1	>tr|E9PUK6|E9PUK6_MOUSE Serine/arginine repetitive matrix protein 1 OS=Mus musculus GN=Srrm1 PE=4 SV=1;>tr|A2A8V9|A2A8V9_MOUSE Serine/arginine repetitive matrix 1 OS=Mus musculus GN=Srrm1 PE=4 SV=1;>sp|Q52KI8|SRRM1_MOUSE Serine/arginine repetitive matrix p	0.995108	27.0986	0.882022	8.15527	1.10563e-14	92.788	0.965929	18.3153	7.3858e-16	107.47	0.990717	20.2604	2.52764e-16	114.63	0.995108	27.0986	1.26634e-16	116.28		1;2;3	S	AAKKPPAPPSPVQSQSPSTNWSPAVPAKKAK	X;X;X;X;X;X;X;X;X;Phospho (STY);X;X;X;Phospho (STY);X;Phospho (STY);X;X;Phospho (STY);X;X;Phospho (STY);X;X;X;X;X;X;X;X;X	XXXPPPPPPPPPPPPPPPPPPPPPPPPPXXX	1.26634e-16	116.28	109.05	_KPPAPPS(ph)PVQSQS(ph)PSTNWSPAVPAK_	KPPAPPS(0.953)PVQS(0.048)QS(0.995)PS(0.002)T(0.002)NWSPAVPAK	KPPAPPS(13.09)PVQS(-13.09)QS(27.1)PS(-27.1)T(-27.1)NWS(-44.09)PAVPAK	13	3	905.757	-0.51667	1.2888	1.2888	0.7358	0.95881	1.3932	1.3932	0.95188	0.93746	NaN
E9PUK6;A2A8V9;Q52KI8;A2A8V8;E9QKA4;Q52KI8-2;F6UK16	795;790;818;781;795;795;225	E9PUK6	E9PUK6	Serine/arginine repetitive matrix protein 1	Srrm1;Srrm1;Srrm1;Srrm1;Srrm1;Srrm1	>tr|E9PUK6|E9PUK6_MOUSE Serine/arginine repetitive matrix protein 1 OS=Mus musculus GN=Srrm1 PE=4 SV=1;>tr|A2A8V9|A2A8V9_MOUSE Serine/arginine repetitive matrix 1 OS=Mus musculus GN=Srrm1 PE=4 SV=1;>sp|Q52KI8|SRRM1_MOUSE Serine/arginine repetitive matrix p	0.641449	4.6496					0.641449	4.6496	6.78294e-16	109.05	0.442996	0	6.55409e-08	79.143						2	S	KKPPAPPSPVQSQSPSTNWSPAVPAKKAKSP	X;X;X;X;X;X;X;Phospho (STY);X;X;X;X;X;X;X;Phospho (STY);X;X;X;X;X;X;X;X;X;X;X;X;X;Phospho (STY);X	XPPPPPPPPPPPPPPPPPPPPPPPPPXXXXX	6.78294e-16	109.05	85.062	_KPPAPPS(ph)PVQSQSPS(ph)TNWSPAVPAK_	KPPAPPS(0.983)PVQS(0.018)QS(0.222)PS(0.641)T(0.115)NWS(0.021)PAVPAK	KPPAPPS(17.95)PVQS(-17.95)QS(-4.65)PS(4.65)T(-7.49)NWS(-14.72)PAVPAK	15	3	905.757	-0.24504	0.71402	NaN	0.71402	NaN	0.74521	NaN	0.74521	NaN	NaN
E9PUK6;A2A8V9;Q52KI8;A2A8V8;E9QKA4;Q52KI8-2;F6UK16	799;794;822;785;799;799;229	E9PUK6	E9PUK6	Serine/arginine repetitive matrix protein 1	Srrm1;Srrm1;Srrm1;Srrm1;Srrm1;Srrm1	>tr|E9PUK6|E9PUK6_MOUSE Serine/arginine repetitive matrix protein 1 OS=Mus musculus GN=Srrm1 PE=4 SV=1;>tr|A2A8V9|A2A8V9_MOUSE Serine/arginine repetitive matrix 1 OS=Mus musculus GN=Srrm1 PE=4 SV=1;>sp|Q52KI8|SRRM1_MOUSE Serine/arginine repetitive matrix p	0.99864	30.9548	0.99864	30.9548	4.40424e-05	64.749	0.991148	23.56	7.44565e-15	94.259	0.995743	24.5614	1.04765e-08	79.69	0.985964	22.0275	2.91607e-10	82.56		3	S	APPSPVQSQSPSTNWSPAVPAKKAKSPTPSL	X;X;X;Phospho (STY);X;X;X;Phospho (STY);X;Phospho (STY);X;X;X;X;X;Phospho (STY);X;X;X;X;X;X;X;X;X;Phospho (STY);X;X;X;X;X	PPPPPPPPPPPPPPPPPPPPPPXXXXXXXXX	7.44565e-15	94.259	64.749	_KPPAPPS(ph)PVQSQS(ph)PSTNWS(ph)PAVPAK_	KPPAPPS(0.965)PVQS(0.038)QS(0.719)PS(0.058)T(0.221)NWS(0.999)PAVPAK	KPPAPPS(15.09)PVQS(-15.09)QS(5.14)PS(-11.3)T(-5.14)NWS(30.95)PAVPAK	19	3	932.413	-0.11756	0.76964	NaN	NaN	0.76964	0.9313	NaN	NaN	0.9313	NaN
E9PUK6;A2A8V9;Q52KI8;A2A8V8;E9QKA4;Q52KI8-2	461;456;461;461;461;461	E9PUK6	E9PUK6	Serine/arginine repetitive matrix protein 1	Srrm1;Srrm1;Srrm1;Srrm1;Srrm1	>tr|E9PUK6|E9PUK6_MOUSE Serine/arginine repetitive matrix protein 1 OS=Mus musculus GN=Srrm1 PE=4 SV=1;>tr|A2A8V9|A2A8V9_MOUSE Serine/arginine repetitive matrix 1 OS=Mus musculus GN=Srrm1 PE=4 SV=1;>sp|Q52KI8|SRRM1_MOUSE Serine/arginine repetitive matrix p	1	92.8004	0.999953	43.2378	3.25601e-13	149.44	1	162.813	2.66778e-21	205.95	1	89.4845	1.4685e-07	136.46	1	92.8004	7.17395e-14	155.86		1;2	S	RESPSPAPKPRKVELSESEEDKGSKMAAADS	X;X;Phospho (STY);X;Phospho (STY);X;X;X;X;X;X;X;X;X;X;Phospho (STY);X;Phospho (STY);X;X;X;X;X;X;X;Oxidation (M);X;X;X;X;X	XXXXXXXXXXXPPPPPPPPPPPPPPXXXXXX	2.66778e-21	205.95	92.8	_KVELS(ph)ES(ph)EEDK_	KVELS(1)ES(1)EEDK	KVELS(92.8)ES(92.8)EEDK	5	2	726.781	-0.96878	0.71702	0.71702	0.99869	NaN	0.89494	0.89494	1.0647	NaN	NaN
E9PUK6;A2A8V9;Q52KI8;A2A8V8;E9QKA4;Q52KI8-2	463;458;463;463;463;463	E9PUK6	E9PUK6	Serine/arginine repetitive matrix protein 1	Srrm1;Srrm1;Srrm1;Srrm1;Srrm1	>tr|E9PUK6|E9PUK6_MOUSE Serine/arginine repetitive matrix protein 1 OS=Mus musculus GN=Srrm1 PE=4 SV=1;>tr|A2A8V9|A2A8V9_MOUSE Serine/arginine repetitive matrix 1 OS=Mus musculus GN=Srrm1 PE=4 SV=1;>sp|Q52KI8|SRRM1_MOUSE Serine/arginine repetitive matrix p	1	92.8004	0.999801	37.0171	3.25601e-13	149.44	1	162.813	2.66778e-21	205.95	1	89.4845	1.4685e-07	136.46	1	92.8004	1.45596e-14	157.42		1;2	S	SPSPAPKPRKVELSESEEDKGSKMAAADSVQ	Phospho (STY);X;Phospho (STY);X;X;X;X;X;X;X;X;X;X;Phospho (STY);X;Phospho (STY);X;X;X;X;X;X;X;Oxidation (M);X;X;X;X;X;X;X	XXXXXXXXXPPPPPPPPPPPPPPXXXXXXXX	2.66778e-21	205.95	92.8	_KVELS(ph)ES(ph)EEDK_	KVELS(1)ES(1)EEDK	KVELS(92.8)ES(92.8)EEDK	7	2	726.781	-0.96878	0.8737	0.8737	0.82543	NaN	0.92362	0.92362	1.0582	NaN	NaN
E9PUK6;A2A8V9;Q52KI8;A2A8V8;E9QKA4;Q52KI8-2	469;464;469;469;469;469	E9PUK6	E9PUK6	Serine/arginine repetitive matrix protein 1	Srrm1;Srrm1;Srrm1;Srrm1;Srrm1	>tr|E9PUK6|E9PUK6_MOUSE Serine/arginine repetitive matrix protein 1 OS=Mus musculus GN=Srrm1 PE=4 SV=1;>tr|A2A8V9|A2A8V9_MOUSE Serine/arginine repetitive matrix 1 OS=Mus musculus GN=Srrm1 PE=4 SV=1;>sp|Q52KI8|SRRM1_MOUSE Serine/arginine repetitive matrix p	0.999619	34.5022	0.854853	8.33104	0.000290807	100.77					0.999619	34.5022	0.000464932	93.754						1;2	S	KPRKVELSESEEDKGSKMAAADSVQQRRQYR	X;X;X;X;X;X;X;Phospho (STY);X;Phospho (STY);X;X;X;X;X;Phospho (STY);X;Oxidation (M);X;X;X;X;X;X;X;X;X;X;X;X;X	XXXPPPPPPPPPPPPPPXXXXXXXXXXXXXX	0.000290807	100.77	93.754	_KVELSESEEDKGS(ph)K_	KVELSESEEDKGS(1)K	KVELS(-45.81)ES(-34.5)EEDKGS(34.5)K	13	2	822.872	-0.13201	0.88262	0.88262	1.1541	NaN	1.0957	1.0957	1.2732	NaN	NaN
E9PUK6;A2A8V9;Q52KI8;A2A8V8;E9QKA4;Q52KI8-2	387;382;387;387;387;387	E9PUK6	E9PUK6	Serine/arginine repetitive matrix protein 1	Srrm1;Srrm1;Srrm1;Srrm1;Srrm1	>tr|E9PUK6|E9PUK6_MOUSE Serine/arginine repetitive matrix protein 1 OS=Mus musculus GN=Srrm1 PE=4 SV=1;>tr|A2A8V9|A2A8V9_MOUSE Serine/arginine repetitive matrix 1 OS=Mus musculus GN=Srrm1 PE=4 SV=1;>sp|Q52KI8|SRRM1_MOUSE Serine/arginine repetitive matrix p	0.999993	51.0195	0.999982	47.3257	6.59094e-05	160.8	0.999993	51.0195	0.000434002	124.62	0.999977	43.3604	9.15132e-05	155.43	0.999981	45.4876	0.000290101	141.34		1;2	S	PPKRTSSPPRKTRRLSPSASPPRRRHRPSSP	X;X;X;X;X;X;X;X;X;X;X;X;X;X;X;Phospho (STY);X;Phospho (STY);X;Phospho (STY);X;X;X;X;X;X;X;X;Phospho (STY);Phospho (STY);X	XXXXXXXXXXXXXPPPPPPPPPPXXXXXXXX	6.59094e-05	160.8	114.31	_RLS(ph)PS(ph)ASPPR_	RLS(1)PS(0.936)AS(0.064)PPR	RLS(51.02)PS(11.67)AS(-11.67)PPR	3	2	614.268	0.066032	0.78221	0.78221	0.75963	NaN	0.7914	0.7914	0.92577	NaN	NaN
E9PUK6;A2A8V9;Q52KI8;A2A8V8;E9QKA4;Q52KI8-2	389;384;389;389;389;389	E9PUK6	E9PUK6	Serine/arginine repetitive matrix protein 1	Srrm1;Srrm1;Srrm1;Srrm1;Srrm1	>tr|E9PUK6|E9PUK6_MOUSE Serine/arginine repetitive matrix protein 1 OS=Mus musculus GN=Srrm1 PE=4 SV=1;>tr|A2A8V9|A2A8V9_MOUSE Serine/arginine repetitive matrix 1 OS=Mus musculus GN=Srrm1 PE=4 SV=1;>sp|Q52KI8|SRRM1_MOUSE Serine/arginine repetitive matrix p	0.98498	18.1668	0.970548	15.179	0.000252502	127.36	0.976819	16.2468	0.00112772	116.19	0.925002	10.9109	0.00118903	115.68	0.98498	18.1668	0.000290101	141.34		2	S	KRTSSPPRKTRRLSPSASPPRRRHRPSSPAT	X;X;X;X;X;X;X;X;X;X;X;X;X;Phospho (STY);X;Phospho (STY);X;Phospho (STY);X;X;X;X;X;X;X;X;Phospho (STY);Phospho (STY);X;X;Phospho (STY)	XXXXXXXXXXXPPPPPPPPPPXXXXXXXXXX	0.000290101	141.34	78.324	_RLSPS(ph)AS(ph)PPR_	RLS(0.015)PS(0.985)AS(1)PPR	RLS(-18.17)PS(18.17)AS(37.56)PPR	5	3	409.848	0.12573	1.0249	NaN	1.0249	NaN	1.2401	NaN	1.2401	NaN	NaN
E9PUK6;A2A8V9;Q52KI8;A2A8V8;E9QKA4;Q52KI8-2	391;386;391;391;391;391	E9PUK6	E9PUK6	Serine/arginine repetitive matrix protein 1	Srrm1;Srrm1;Srrm1;Srrm1;Srrm1	>tr|E9PUK6|E9PUK6_MOUSE Serine/arginine repetitive matrix protein 1 OS=Mus musculus GN=Srrm1 PE=4 SV=1;>tr|A2A8V9|A2A8V9_MOUSE Serine/arginine repetitive matrix 1 OS=Mus musculus GN=Srrm1 PE=4 SV=1;>sp|Q52KI8|SRRM1_MOUSE Serine/arginine repetitive matrix p	1	82.6743	0.990337	20.1039	6.59094e-05	160.8	0.999983	47.5441	0.000434002	124.62	0.999996	53.226	9.15132e-05	155.43	1	82.6743	0.000293328	139.78		1;2	S	TSSPPRKTRRLSPSASPPRRRHRPSSPATPP	X;X;X;X;X;X;X;X;X;X;X;Phospho (STY);X;Phospho (STY);X;Phospho (STY);X;X;X;X;X;X;X;X;Phospho (STY);Phospho (STY);X;X;Phospho (STY);X;X	XXXXXXXXXPPPPPPPPPPXXXXXXXXXXXX	6.41032e-05	160.8	139.78	_RLSPS(ph)AS(ph)PPR_	RLS(0.02)PS(0.98)AS(1)PPR	RLS(-16.82)PS(16.82)AS(82.67)PPR	7	3	409.848	-0.052146	0.9396	0.9396	0.77203	NaN	0.96699	0.96699	0.91793	NaN	NaN
E9PUK6;A2A8V9;Q52KI8;A2A8V8;E9QKA4;Q52KI8-2;F6UK16	572;567;572;558;572;572;18	E9PUK6	E9PUK6	Serine/arginine repetitive matrix protein 1	Srrm1;Srrm1;Srrm1;Srrm1;Srrm1;Srrm1	>tr|E9PUK6|E9PUK6_MOUSE Serine/arginine repetitive matrix protein 1 OS=Mus musculus GN=Srrm1 PE=4 SV=1;>tr|A2A8V9|A2A8V9_MOUSE Serine/arginine repetitive matrix 1 OS=Mus musculus GN=Srrm1 PE=4 SV=1;>sp|Q52KI8|SRRM1_MOUSE Serine/arginine repetitive matrix p	1	159.695	1	89.46	4.61789e-15	146.2	1	95.4135	9.77743e-30	167.69	1	136.299	5.62677e-31	174.59	1	159.695	2.3756e-21	159.69		1;2	S	RRRRSPSPPPARRRRSPSPAPPPPPPPPPPR	X;X;X;X;X;X;X;X;X;X;X;X;X;X;X;Phospho (STY);X;Phospho (STY);X;X;X;X;X;X;X;X;X;X;X;X;X	XXXXXXXXXXXXXPPPPPPPPPPPPPPPPPP	5.62677e-31	174.59	159.69	_S(ph)PS(ph)PAPPPPPPPPPPR_	S(1)PS(1)PAPPPPPPPPPPR	S(159.69)PS(159.69)PAPPPPPPPPPPR	1	3	582.267	0.099563	0.90152	0.90152	1.0126	NaN	0.98646	0.98646	0.93484	NaN	NaN
E9PUK6;A2A8V9;Q52KI8;A2A8V8;E9QKA4;Q52KI8-2;F6UK16	574;569;574;560;574;574;20	E9PUK6	E9PUK6	Serine/arginine repetitive matrix protein 1	Srrm1;Srrm1;Srrm1;Srrm1;Srrm1;Srrm1	>tr|E9PUK6|E9PUK6_MOUSE Serine/arginine repetitive matrix protein 1 OS=Mus musculus GN=Srrm1 PE=4 SV=1;>tr|A2A8V9|A2A8V9_MOUSE Serine/arginine repetitive matrix 1 OS=Mus musculus GN=Srrm1 PE=4 SV=1;>sp|Q52KI8|SRRM1_MOUSE Serine/arginine repetitive matrix p	1	159.695	1	89.46	3.0699e-12	142.88	1	95.4135	4.61789e-15	146.2	1	136.299	3.02924e-31	178.85	1	159.695	2.3756e-21	159.69		1;2	S	RRSPSPPPARRRRSPSPAPPPPPPPPPPRRR	X;X;X;X;X;X;X;X;X;X;X;X;X;Phospho (STY);X;Phospho (STY);X;X;X;X;X;X;X;X;X;X;X;X;X;X;X	XXXXXXXXXXXPPPPPPPPPPPPPPPPPPXX	3.02924e-31	178.85	159.69	_S(ph)PS(ph)PAPPPPPPPPPPR_	S(1)PS(1)PAPPPPPPPPPPR	S(159.69)PS(159.69)PAPPPPPPPPPPR	3	3	582.267	0.099563	0.98486	0.98486	1.0126	NaN	0.98019	0.98019	0.93484	NaN	NaN
E9PUK6;A2A8V9;Q52KI8;A2A8V8;E9QKA4;Q52KI8-2;F6UK16	635;630;635;621;635;635;81	E9PUK6	E9PUK6	Serine/arginine repetitive matrix protein 1	Srrm1;Srrm1;Srrm1;Srrm1;Srrm1;Srrm1	>tr|E9PUK6|E9PUK6_MOUSE Serine/arginine repetitive matrix protein 1 OS=Mus musculus GN=Srrm1 PE=4 SV=1;>tr|A2A8V9|A2A8V9_MOUSE Serine/arginine repetitive matrix 1 OS=Mus musculus GN=Srrm1 PE=4 SV=1;>sp|Q52KI8|SRRM1_MOUSE Serine/arginine repetitive matrix p	1	91.812	1	92.8004	3.58055e-05	136.5	1	79.6386	2.55706e-06	164.65	1	97.4171	4.93881e-05	137.89	1	91.812	3.58055e-05	136.5		1;2	S	QRRYSPSPPPKRRTASPPPPPKRRASPSPPP	X;X;X;X;Phospho (STY);X;Phospho (STY);X;X;X;X;X;X;Phospho (STY);X;Phospho (STY);X;X;X;X;X;X;X;X;X;X;X;X;X;X;X	XXXXXXXXXXXPPPPPPPPPPPPXXXXXXXX	2.55706e-06	164.65	91.812	_RRT(ph)AS(ph)PPPPPK_	RRT(1)AS(1)PPPPPK	RRT(91.81)AS(91.81)PPPPPK	5	3	455.214	-0.11678	0.89315	0.89315	1.1986	NaN	1.0021	1.0021	1.1382	NaN	NaN
E9PUK6;A2A8V9;Q52KI8;A2A8V8;E9QKA4;Q52KI8-2;F6UK16	655;650;655;641;655;655;101	E9PUK6	E9PUK6	Serine/arginine repetitive matrix protein 1	Srrm1;Srrm1;Srrm1;Srrm1;Srrm1;Srrm1	>tr|E9PUK6|E9PUK6_MOUSE Serine/arginine repetitive matrix protein 1 OS=Mus musculus GN=Srrm1 PE=4 SV=1;>tr|A2A8V9|A2A8V9_MOUSE Serine/arginine repetitive matrix 1 OS=Mus musculus GN=Srrm1 PE=4 SV=1;>sp|Q52KI8|SRRM1_MOUSE Serine/arginine repetitive matrix p	1	136.932					1	96.0589	0.00277215	116.19					1	136.932	0.000149984	136.93		2	S	PKRRASPSPPPKRRVSHSPPPKQRSPTVTKR	X;X;X;X;X;X;X;X;X;X;X;X;X;X;X;Phospho (STY);X;Phospho (STY);X;X;X;X;X;X;Phospho (STY);X;X;X;X;X;X	XXXXXXXXXXXXXPPPPPPPPPXXXXXXXXX	0.000149984	136.93	136.93	_RVS(ph)HS(ph)PPPK_	RVS(1)HS(1)PPPK	RVS(136.93)HS(136.93)PPPK	3	2	582.752	-0.14284	1.0811	NaN	1.0811	NaN	0.98691	NaN	0.98691	NaN	NaN
E9PUK6;A2A8V9;Q52KI8;A2A8V8;E9QKA4;Q52KI8-2;F6UK16	657;652;657;643;657;657;103	E9PUK6	E9PUK6	Serine/arginine repetitive matrix protein 1	Srrm1;Srrm1;Srrm1;Srrm1;Srrm1;Srrm1	>tr|E9PUK6|E9PUK6_MOUSE Serine/arginine repetitive matrix protein 1 OS=Mus musculus GN=Srrm1 PE=4 SV=1;>tr|A2A8V9|A2A8V9_MOUSE Serine/arginine repetitive matrix 1 OS=Mus musculus GN=Srrm1 PE=4 SV=1;>sp|Q52KI8|SRRM1_MOUSE Serine/arginine repetitive matrix p	1	136.932					1	96.0589	0.00277215	116.19					1	136.932	0.000149984	136.93		2	S	RRASPSPPPKRRVSHSPPPKQRSPTVTKRRS	X;X;X;X;X;X;X;X;X;X;X;X;X;Phospho (STY);X;Phospho (STY);X;X;X;X;X;X;Phospho (STY);X;X;X;X;X;X;X;X	XXXXXXXXXXXPPPPPPPPPXXXXXXXXXXX	0.000149984	136.93	136.93	_RVS(ph)HS(ph)PPPK_	RVS(1)HS(1)PPPK	RVS(136.93)HS(136.93)PPPK	5	2	582.752	-0.14284	1.0811	NaN	1.0811	NaN	0.98691	NaN	0.98691	NaN	NaN
E9PUK6;A2A8V9;Q52KI8;A2A8V8;E9QKA4;Q52KI8-2;F6UK16	616;611;616;602;616;616;62	E9PUK6	E9PUK6	Serine/arginine repetitive matrix protein 1	Srrm1;Srrm1;Srrm1;Srrm1;Srrm1;Srrm1	>tr|E9PUK6|E9PUK6_MOUSE Serine/arginine repetitive matrix protein 1 OS=Mus musculus GN=Srrm1 PE=4 SV=1;>tr|A2A8V9|A2A8V9_MOUSE Serine/arginine repetitive matrix 1 OS=Mus musculus GN=Srrm1 PE=4 SV=1;>sp|Q52KI8|SRRM1_MOUSE Serine/arginine repetitive matrix p	1	85.1349	1	85.1349	0.00102634	129.82	1	63.8131	0.00105047	130.98	1	74.5211	0.00555918	121.6	1	69.1825	0.000737796	147.74		1	S	PSPPPRRRSPSPRRYSPPIQRRYSPSPPPKR	X;X;X;X;X;X;X;X;X;X;X;X;X;X;X;Phospho (STY);X;X;X;X;X;X;X;Phospho (STY);X;Phospho (STY);X;X;X;X;X	XXXXXXXXXXXXXPPPPPPPPXXXXXXXXXX	0.000737796	147.74	119.22	_RYS(ph)PPIQR_	RYS(1)PPIQR	RY(-85.13)S(85.13)PPIQR	3	2	548.769	-0.22997	0.77447	0.77447	NaN	NaN	0.99105	0.99105	NaN	NaN	NaN
E9PUK6;A2A8V9;Q52KI8;A2A8V8;E9QKA4;Q52KI8-2;F6UK16	624;619;624;610;624;624;70	E9PUK6	E9PUK6	Serine/arginine repetitive matrix protein 1	Srrm1;Srrm1;Srrm1;Srrm1;Srrm1;Srrm1	>tr|E9PUK6|E9PUK6_MOUSE Serine/arginine repetitive matrix protein 1 OS=Mus musculus GN=Srrm1 PE=4 SV=1;>tr|A2A8V9|A2A8V9_MOUSE Serine/arginine repetitive matrix 1 OS=Mus musculus GN=Srrm1 PE=4 SV=1;>sp|Q52KI8|SRRM1_MOUSE Serine/arginine repetitive matrix p	0.999998	57.7002	0.999994	52.2863	0.026813	89.43	0.999991	50.5929	0.00672892	107.53	0.999916	40.77	0.0146848	98.942	0.999998	57.7002	0.00277215	116.19		1;2	S	SPSPRRYSPPIQRRYSPSPPPKRRTASPPPP	X;X;X;X;X;X;X;Phospho (STY);X;X;X;X;X;X;X;Phospho (STY);X;Phospho (STY);X;X;X;X;X;X;Phospho (STY);X;Phospho (STY);X;X;X;X	XXXXXXXXXXXXXPPPPPPPPPXXXXXXXXX	0.00277215	116.19	98.942	_RYS(ph)PS(ph)PPPK_	RYS(1)PS(1)PPPK	RY(-57.7)S(57.7)PS(68.74)PPPK	3	2	594.746	0.46361	1.1096	1.1096	0.8704	NaN	1.121	1.121	0.96577	NaN	NaN
E9PUK6;A2A8V9;Q52KI8;A2A8V8;E9QKA4;Q52KI8-2;F6UK16	626;621;626;612;626;626;72	E9PUK6	E9PUK6	Serine/arginine repetitive matrix protein 1	Srrm1;Srrm1;Srrm1;Srrm1;Srrm1;Srrm1	>tr|E9PUK6|E9PUK6_MOUSE Serine/arginine repetitive matrix protein 1 OS=Mus musculus GN=Srrm1 PE=4 SV=1;>tr|A2A8V9|A2A8V9_MOUSE Serine/arginine repetitive matrix 1 OS=Mus musculus GN=Srrm1 PE=4 SV=1;>sp|Q52KI8|SRRM1_MOUSE Serine/arginine repetitive matrix p	1	74.5043	1	69.7889	0.026813	89.43	1	69.2915	0.00672892	107.53	0.999998	58.0764	0.0146848	98.942	1	74.5043	0.00277215	116.19		1;2	S	SPRRYSPPIQRRYSPSPPPKRRTASPPPPPK	X;X;X;X;X;Phospho (STY);X;X;X;X;X;X;X;Phospho (STY);X;Phospho (STY);X;X;X;X;X;X;Phospho (STY);X;Phospho (STY);X;X;X;X;X;X	XXXXXXXXXXXPPPPPPPPPXXXXXXXXXXX	0.00277215	116.19	116.19	_RYS(ph)PS(ph)PPPK_	RYS(1)PS(1)PPPK	RY(-54.95)S(54.95)PS(74.5)PPPK	5	2	594.746	0.61904	1.1075	1.1075	0.8704	NaN	1.0719	1.0719	0.96577	NaN	NaN
E9PUK6;A2A8V9;Q52KI8;A2A8V8;E9QKA4;Q52KI8-2;F6UK16	770;765;793;756;770;770;200	E9PUK6	E9PUK6	Serine/arginine repetitive matrix protein 1	Srrm1;Srrm1;Srrm1;Srrm1;Srrm1;Srrm1	>tr|E9PUK6|E9PUK6_MOUSE Serine/arginine repetitive matrix protein 1 OS=Mus musculus GN=Srrm1 PE=4 SV=1;>tr|A2A8V9|A2A8V9_MOUSE Serine/arginine repetitive matrix 1 OS=Mus musculus GN=Srrm1 PE=4 SV=1;>sp|Q52KI8|SRRM1_MOUSE Serine/arginine repetitive matrix p	1	122.745													1	122.745	0.0011364	122.75		3	S	ASPSPQSVRRVSSSRSVSGSPEPAAKKPPAP	X;Phospho (STY);X;Phospho (STY);X;X;X;X;X;X;X;X;X;X;X;Phospho (STY);X;Phospho (STY);X;Phospho (STY);X;X;X;X;X;X;X;X;X;X;X	XXXXXXXXXXXXXXXPPPPPPPPPPPXXXXX	0.0011364	122.75	122.75	_S(ph)VS(ph)GS(ph)PEPAAK_	S(1)VS(1)GS(1)PEPAAK	S(122.75)VS(122.75)GS(122.75)PEPAAK	1	2	635.214	-0.1142	1.1982	NaN	NaN	1.1982	1.0826	NaN	NaN	1.0826	NaN
E9PUK6;A2A8V9;Q52KI8;A2A8V8;E9QKA4;Q52KI8-2;F6UK16	772;767;795;758;772;772;202	E9PUK6	E9PUK6	Serine/arginine repetitive matrix protein 1	Srrm1;Srrm1;Srrm1;Srrm1;Srrm1;Srrm1	>tr|E9PUK6|E9PUK6_MOUSE Serine/arginine repetitive matrix protein 1 OS=Mus musculus GN=Srrm1 PE=4 SV=1;>tr|A2A8V9|A2A8V9_MOUSE Serine/arginine repetitive matrix 1 OS=Mus musculus GN=Srrm1 PE=4 SV=1;>sp|Q52KI8|SRRM1_MOUSE Serine/arginine repetitive matrix p	1	122.745													1	122.745	0.0011364	122.75		3	S	PSPQSVRRVSSSRSVSGSPEPAAKKPPAPPS	X;Phospho (STY);X;X;X;X;X;X;X;X;X;X;X;Phospho (STY);X;Phospho (STY);X;Phospho (STY);X;X;X;X;X;X;X;X;X;X;X;X;Phospho (STY)	XXXXXXXXXXXXXPPPPPPPPPPPXXXXXXX	0.0011364	122.75	122.75	_S(ph)VS(ph)GS(ph)PEPAAK_	S(1)VS(1)GS(1)PEPAAK	S(122.75)VS(122.75)GS(122.75)PEPAAK	3	2	635.214	-0.1142	1.1982	NaN	NaN	1.1982	1.0826	NaN	NaN	1.0826	NaN
E9PUK6;A2A8V9;Q52KI8;A2A8V8;E9QKA4;Q52KI8-2;F6UK16	774;769;797;760;774;774;204	E9PUK6	E9PUK6	Serine/arginine repetitive matrix protein 1	Srrm1;Srrm1;Srrm1;Srrm1;Srrm1;Srrm1	>tr|E9PUK6|E9PUK6_MOUSE Serine/arginine repetitive matrix protein 1 OS=Mus musculus GN=Srrm1 PE=4 SV=1;>tr|A2A8V9|A2A8V9_MOUSE Serine/arginine repetitive matrix 1 OS=Mus musculus GN=Srrm1 PE=4 SV=1;>sp|Q52KI8|SRRM1_MOUSE Serine/arginine repetitive matrix p	1	122.745													1	122.745	0.0011364	122.75		3	S	PQSVRRVSSSRSVSGSPEPAAKKPPAPPSPV	X;X;X;X;X;X;X;X;X;X;X;Phospho (STY);X;Phospho (STY);X;Phospho (STY);X;X;X;X;X;X;X;X;X;X;X;X;Phospho (STY);X;X	XXXXXXXXXXXPPPPPPPPPPPXXXXXXXXX	0.0011364	122.75	122.75	_S(ph)VS(ph)GS(ph)PEPAAK_	S(1)VS(1)GS(1)PEPAAK	S(122.75)VS(122.75)GS(122.75)PEPAAK	5	2	635.214	-0.1142	1.1982	NaN	NaN	1.1982	1.0826	NaN	NaN	1.0826	NaN
A2A8Z1;E9PXZ2;F6UHR6;E9Q6C1;A2A8Z1-2;Q5FWX7	319;306;302;239;222;209	A2A8Z1;A2A8Z1-2	A2A8Z1	Oxysterol-binding protein-related protein 9;Oxysterol-binding protein;Oxysterol-binding protein;Oxysterol-binding protein;Oxysterol-binding protein	Osbpl9;Osbpl9;Osbpl9;Osbpl9;Osbpl9	>sp|A2A8Z1|OSBL9_MOUSE Oxysterol-binding protein-related protein 9 OS=Mus musculus GN=Osbpl9 PE=1 SV=1;>tr|E9PXZ2|E9PXZ2_MOUSE Oxysterol-binding protein OS=Mus musculus GN=Osbpl9 PE=3 SV=2;>tr|F6UHR6|F6UHR6_MOUSE Oxysterol-binding protein OS=Mus musculus G	0.713106	7.53818					0.713106	7.53818	3.6291e-06	86.488										1	S	SGSSPKRLIDSSGSASVLTHSSSGNSLKRPD	X;X;X;X;X;X;X;X;X;X;X;X;X;X;X;Phospho (STY);X;X;X;X;X;X;X;X;X;X;X;X;X;X;X	XXXXXXXPPPPPPPPPPPPPPPPPPPPPXXX	3.6291e-06	86.488	86.488	_LIDSSGSAS(ph)VLTHSSSGNSLK_	LIDSSGS(0.004)AS(0.713)VLT(0.103)HS(0.013)S(0.013)S(0.126)GNS(0.028)LK	LIDS(-48.07)S(-48.47)GS(-22.8)AS(7.54)VLT(-8.41)HS(-17.3)S(-17.3)S(-7.54)GNS(-14.06)LK	9	3	709.67	-0.45554	0.31656	0.31656	NaN	NaN	0.38377	0.38377	NaN	NaN	NaN
A2A8Z1;E9PXZ2;F6UHR6;E9Q6C1;A2A8Z1-2;Q5FWX7	324;311;307;244;227;214	A2A8Z1;A2A8Z1-2	A2A8Z1	Oxysterol-binding protein-related protein 9;Oxysterol-binding protein;Oxysterol-binding protein;Oxysterol-binding protein;Oxysterol-binding protein	Osbpl9;Osbpl9;Osbpl9;Osbpl9;Osbpl9	>sp|A2A8Z1|OSBL9_MOUSE Oxysterol-binding protein-related protein 9 OS=Mus musculus GN=Osbpl9 PE=1 SV=1;>tr|E9PXZ2|E9PXZ2_MOUSE Oxysterol-binding protein OS=Mus musculus GN=Osbpl9 PE=3 SV=2;>tr|F6UHR6|F6UHR6_MOUSE Oxysterol-binding protein OS=Mus musculus G	0.455194	0					0.280592	0	0.00160426	57.936	0.242859	0	0.0528372	33.405	0.455194	0	1.14165e-06	101.05			S	KRLIDSSGSASVLTHSSSGNSLKRPDTTESL	X;X;X;X;X;X;X;X;X;X;X;X;X;X;X;Phospho (STY);X;X;X;X;X;X;X;X;X;X;X;X;X;X;X	XXPPPPPPPPPPPPPPPPPPPPPXXXXXXXX	1.14165e-06	101.05	76.713	_LIDSSGSASVLTHS(ph)SSGNSLK_	LIDSS(0.001)GS(0.003)AS(0.001)VLT(0.014)HS(0.455)S(0.455)S(0.067)GNS(0.004)LK	LIDS(-36.85)S(-29.51)GS(-22.34)AS(-24.92)VLT(-15.24)HS(0)S(0)S(-8.3)GNS(-20.59)LK	14	3	709.67	-0.37564
A2A8Z1;E9PXZ2;F6UHR6;E9Q6C1;A2A8Z1-2;Q5FWX7	325;312;308;245;228;215	A2A8Z1;A2A8Z1-2	A2A8Z1	Oxysterol-binding protein-related protein 9;Oxysterol-binding protein;Oxysterol-binding protein;Oxysterol-binding protein;Oxysterol-binding protein	Osbpl9;Osbpl9;Osbpl9;Osbpl9;Osbpl9	>sp|A2A8Z1|OSBL9_MOUSE Oxysterol-binding protein-related protein 9 OS=Mus musculus GN=Osbpl9 PE=1 SV=1;>tr|E9PXZ2|E9PXZ2_MOUSE Oxysterol-binding protein OS=Mus musculus GN=Osbpl9 PE=3 SV=2;>tr|F6UHR6|F6UHR6_MOUSE Oxysterol-binding protein OS=Mus musculus G	0.759999	6.49439					0.759999	6.49439	1.11613e-06	102.16	0.242859	0	0.0528372	33.405	0.754114	8.77278	2.79084e-33	161.53		1	S	RLIDSSGSASVLTHSSSGNSLKRPDTTESLN	X;X;X;X;X;X;X;X;X;X;X;X;X;X;X;Phospho (STY);X;X;X;X;X;X;X;X;X;X;X;X;X;X;X	XPPPPPPPPPPPPPPPPPPPPPXXXXXXXXX	2.79084e-33	161.53	102.16	_LIDSSGSASVLTHSS(ph)SGNSLK_	LIDSSGSASVLTHS(0.022)S(0.76)S(0.17)GNS(0.047)LK	LIDS(-74.99)S(-75.75)GS(-72.67)AS(-57.06)VLT(-34.33)HS(-15.37)S(6.49)S(-6.49)GNS(-12.06)LK	15	2	1064	-0.077517	0.42363	0.42363	NaN	NaN	0.46463	0.46463	NaN	NaN	NaN
A2A8Z1;E9PXZ2;F6UHR6;E9Q6C1;A2A8Z1-2;Q5FWX7	326;313;309;246;229;216	A2A8Z1;A2A8Z1-2	A2A8Z1	Oxysterol-binding protein-related protein 9;Oxysterol-binding protein;Oxysterol-binding protein;Oxysterol-binding protein;Oxysterol-binding protein	Osbpl9;Osbpl9;Osbpl9;Osbpl9;Osbpl9	>sp|A2A8Z1|OSBL9_MOUSE Oxysterol-binding protein-related protein 9 OS=Mus musculus GN=Osbpl9 PE=1 SV=1;>tr|E9PXZ2|E9PXZ2_MOUSE Oxysterol-binding protein OS=Mus musculus GN=Osbpl9 PE=3 SV=2;>tr|F6UHR6|F6UHR6_MOUSE Oxysterol-binding protein OS=Mus musculus G	0.851704	9.25129					0.851704	9.25129	1.10464e-06	102.66	0.242859	0	0.0528372	33.405	0.829882	7.01867	8.46323e-16	171.08		1	S	LIDSSGSASVLTHSSSGNSLKRPDTTESLNS	X;X;X;X;X;X;X;X;X;X;X;X;X;X;X;Phospho (STY);X;X;X;X;X;X;X;X;X;X;X;X;X;X;X	PPPPPPPPPPPPPPPPPPPPPXXXXXXXXXX	2.8382e-24	171.08	102.66	_LIDSSGSASVLTHSSS(ph)GNSLK_	LIDS(0.003)S(0.001)GS(0.002)AS(0.008)VLT(0.013)HS(0.019)S(0.101)S(0.852)GNS(0.002)LK	LIDS(-24.39)S(-31.66)GS(-25.77)AS(-20.48)VLT(-18.33)HS(-16.48)S(-9.25)S(9.25)GNS(-26.61)LK	16	2	1064	0.37911	0.56798	0.56798	NaN	NaN	0.57577	0.57577	NaN	NaN	NaN
A2A8Z1;E9PXZ2;F6UHR6;E9Q6C1;A2A8Z1-2;Q5FWX7	329;316;312;249;232;219	A2A8Z1;A2A8Z1-2	A2A8Z1	Oxysterol-binding protein-related protein 9;Oxysterol-binding protein;Oxysterol-binding protein;Oxysterol-binding protein;Oxysterol-binding protein	Osbpl9;Osbpl9;Osbpl9;Osbpl9;Osbpl9	>sp|A2A8Z1|OSBL9_MOUSE Oxysterol-binding protein-related protein 9 OS=Mus musculus GN=Osbpl9 PE=1 SV=1;>tr|E9PXZ2|E9PXZ2_MOUSE Oxysterol-binding protein OS=Mus musculus GN=Osbpl9 PE=3 SV=2;>tr|F6UHR6|F6UHR6_MOUSE Oxysterol-binding protein OS=Mus musculus G	0.7545	7.17399					0.558853	6.03181	0.00203034	56.424					0.7545	7.17399	1.29936e-05	78.95		1	S	SSGSASVLTHSSSGNSLKRPDTTESLNSSMS	X;X;X;X;X;X;X;X;X;X;X;X;X;X;X;Phospho (STY);X;X;X;X;X;X;X;X;X;X;X;X;X;X;X	PPPPPPPPPPPPPPPPPPXXXXXXXXXXXXX	1.29936e-05	78.95	52.172	_LIDSSGSASVLTHSSSGNS(ph)LK_	LIDSSGS(0.001)AS(0.009)VLT(0.03)HS(0.03)S(0.03)S(0.145)GNS(0.755)LK	LIDS(-43.89)S(-40.04)GS(-30.5)AS(-19.31)VLT(-13.95)HS(-13.95)S(-13.95)S(-7.17)GNS(7.17)LK	19	3	709.67	-0.55627	0.65346	0.65346	NaN	NaN	0.62955	0.62955	NaN	NaN	NaN
Q9JKK0;A2A994;B0QZL9;Q7TNY3;Q9JHG6;Q9JHG6-2;Q9JHG6-3	152;152;105;165;112;112;32	Q9JKK0	Q9JKK0	Calcipressin-3;Calcipressin-1	Rcan3;Rcan3;Rcan3;Rcan1;Rcan1	>sp|Q9JKK0|RCAN3_MOUSE Calcipressin-3 OS=Mus musculus GN=Rcan3 PE=1 SV=1;>tr|A2A994|A2A994_MOUSE Calcipressin-3 (Fragment) OS=Mus musculus GN=Rcan3 PE=4 SV=1;>tr|B0QZL9|B0QZL9_MOUSE Calcipressin-3 (Fragment) OS=Mus musculus GN=Rcan3 PE=4 SV=1;>tr|Q7TNY3|Q7	1	59.5852	0.899403	9.5137	0.0868916	39.005	1	61.8704	2.09986e-21	168.05	1	73.809	8.63418e-05	121.24	1	59.5852	0.000181872	136.39		1;2	S	LPPQPTKQFLISPPASPPVGWKQSEDAMPVI	X;X;X;X;X;X;X;X;X;X;X;Phospho (STY);X;X;X;Phospho (STY);X;X;X;X;X;X;X;X;X;X;X;X;X;X;X	XXXXXXXPPPPPPPPPPPPPPPXXXXXXXXX	2.09986e-21	168.05	59.585	_QFLIS(ph)PPAS(ph)PPVGWK_	QFLIS(1)PPAS(1)PPVGWK	QFLIS(59.59)PPAS(59.59)PPVGWK	9	2	892.415	0.4754	0.6501	0.6501	0.92971	NaN	0.59758	0.59758	0.85464	NaN	NaN
A2A9C3;A2A9C3-2	3226;3225	A2A9C3	A2A9C3	Protein SZT2	Szt2	>sp|A2A9C3|SZT2_MOUSE Protein SZT2 OS=Mus musculus GN=Szt2 PE=1 SV=1;>sp|A2A9C3-2|SZT2_MOUSE Isoform 2 of Protein SZT2 OS=Mus musculus GN=Szt2	0.952718	14.4684	0.915372	10.7186	1.56329e-15	152.32	0.725726	4.42502	6.00077e-22	158.17					0.952718	14.4684	5.15117e-05	120.24		1	S	FRKPSRLPLEPETPGSLVGSPREASGMMLAP	X;X;X;X;X;X;X;X;X;X;X;X;X;X;X;Phospho (STY);X;X;X;X;X;X;X;X;X;X;X;X;X;X;X	XXXXXXPPPPPPPPPPPPPPPPXXXXXXXXX	6.00077e-22	158.17	120.24	_LPLEPETPGS(ph)LVGSPR_	LPLEPET(0.013)PGS(0.953)LVGS(0.034)PR	LPLEPET(-18.57)PGS(14.47)LVGS(-14.47)PR	10	2	864.932	0.22856	1.1902	1.1902	NaN	NaN	1.3234	1.3234	NaN	NaN	NaN
A2A9C3;A2A9C3-2	3230;3229	A2A9C3	A2A9C3	Protein SZT2	Szt2	>sp|A2A9C3|SZT2_MOUSE Protein SZT2 OS=Mus musculus GN=Szt2 PE=1 SV=1;>sp|A2A9C3-2|SZT2_MOUSE Isoform 2 of Protein SZT2 OS=Mus musculus GN=Szt2	0.999999	62.0637	0.999967	45.9487	3.34746e-10	139.81	0.995891	23.8479	3.7951e-31	177.6	0.999999	62.0637	5.13651e-31	175.39	0.958007	14.2094	7.73219e-07	130.27		1	S	SRLPLEPETPGSLVGSPREASGMMLAPGPAP	X;X;X;X;X;X;X;X;X;X;X;X;X;X;X;Phospho (STY);X;X;X;X;X;X;X;X;X;X;X;X;X;X;X	XXPPPPPPPPPPPPPPPPXXXXXXXXXXXXX	3.7951e-31	177.6	175.39	_LPLEPETPGSLVGS(ph)PR_	LPLEPETPGSLVGS(1)PR	LPLEPET(-98.81)PGS(-62.06)LVGS(62.06)PR	14	2	864.932	0.3888	0.81477	0.81477	NaN	NaN	0.95833	0.95833	NaN	NaN	NaN
Q8BMK0;A2A9K3;Q8C1L6	16;16;16	Q8BMK0	Q8BMK0	Centrosomal protein of 85 kDa	Cep85;Ccdc21;Ccdc21	>sp|Q8BMK0|CEP85_MOUSE Centrosomal protein of 85 kDa OS=Mus musculus GN=Cep85 PE=2 SV=2;>tr|A2A9K3|A2A9K3_MOUSE Coiled-coil domain containing 21 OS=Mus musculus GN=Ccdc21 PE=4 SV=1;>tr|Q8C1L6|Q8C1L6_MOUSE Protein Ccdc21 OS=Mus musculus GN=Ccdc21 PE=2 SV=1	0.984989	18.4453	0.977852	16.4763	3.53557e-09	142.45	0.962814	14.1339	2.10952e-09	153.79	0.964173	14.3067	3.06033e-44	223.7	0.984989	18.4453	2.45306e-09	162.37		1	S	MAMQEKYPNDRSHATSPGSNVIQKGSSLGTE	X;X;X;X;X;X;X;X;X;X;X;X;X;X;X;Phospho (STY);X;X;X;X;X;X;X;X;X;X;X;X;X;X;X	XXXXXXXXXXXPPPPPPPPPPPPPXXXXXXX	3.06033e-44	223.7	162.37	_SHATS(ph)PGSNVIQK_	SHAT(0.014)S(0.985)PGS(0.001)NVIQK	S(-88.54)HAT(-18.45)S(18.45)PGS(-30.29)NVIQK	5	2	703.327	-0.77276	1.3026	1.3026	NaN	NaN	1.2163	1.2163	NaN	NaN	NaN
Q8R1A4;A2A9M5;Q8R1A4-2;E9PX48	1382;1382;1382;1352	Q8R1A4	Q8R1A4	Dedicator of cytokinesis protein 7	Dock7;Dock7;Dock7	>sp|Q8R1A4|DOCK7_MOUSE Dedicator of cytokinesis protein 7 OS=Mus musculus GN=Dock7 PE=1 SV=3;>tr|A2A9M5|A2A9M5_MOUSE Dedicator of cytokinesis 7 OS=Mus musculus GN=Dock7 PE=4 SV=1;>sp|Q8R1A4-2|DOCK7_MOUSE Isoform 2 of Dedicator of cytokinesis protein 7 OS=M	1	82.8951	1	82.8951	4.7505e-05	205.18	0.999968	44.9967	0.0126752	153.97	0.999998	56.5396	0.0126752	153.97	0.999991	50.6395	0.0026367	166.34		1	S	SCFEYKGKKVFERMNSLTFKKSKDMRAKLEE	X;X;X;X;X;X;X;X;X;X;X;X;X;Oxidation (M);X;Phospho (STY);X;X;X;X;X;X;X;X;X;X;X;X;X;X;X	XXXXXXXXXXXXXPPPPPPPXXXXXXXXXXX	4.7505e-05	205.18	205.18	_MNS(ph)LTFK_	MNS(1)LTFK	MNS(82.9)LT(-82.9)FK	3	2	460.701	0.18271	0.9571	0.9571	NaN	NaN	1.0218	1.0218	NaN	NaN	NaN
Q8R1A4;A2A9M5;Q8R1A4-2;E9PX48	962;962;962;932	Q8R1A4	Q8R1A4	Dedicator of cytokinesis protein 7	Dock7;Dock7;Dock7	>sp|Q8R1A4|DOCK7_MOUSE Dedicator of cytokinesis protein 7 OS=Mus musculus GN=Dock7 PE=1 SV=3;>tr|A2A9M5|A2A9M5_MOUSE Dedicator of cytokinesis 7 OS=Mus musculus GN=Dock7 PE=4 SV=1;>sp|Q8R1A4-2|DOCK7_MOUSE Isoform 2 of Dedicator of cytokinesis protein 7 OS=M	0.631403	2.34387	0.376973	0	0.00478901	62.377	0.581809	1.48984	1.23324e-05	119.32	0.319454	0	0.0114868	98.694	0.631403	2.34387	9.12905e-08	131.54		1	S	SAESTQAMDRSCNRMSSHTETSSFLQTLTGR	X;X;X;X;X;X;X;X;X;X;X;X;X;X;Oxidation (M);Phospho (STY);X;X;X;X;X;X;X;X;X;X;X;X;X;X;X	XXXXXXXXXXXXXXPPPPPPPPPPPPPPPPP	9.12905e-08	131.54	131.54	_M(ox)S(ph)SHTETSSFLQTLTGR_	MS(0.631)S(0.368)HTETSSFLQTLTGR	MS(2.34)S(-2.34)HT(-32.13)ET(-37.09)S(-44.79)S(-50.54)FLQT(-104.8)LT(-111.95)GR	2	2	989.932	-0.26262	0.69329	0.69329	NaN	NaN	0.79675	0.79675	NaN	NaN	1.2147
Q8R1A4;A2A9M5;Q8R1A4-2;E9PX48	963;963;963;933	Q8R1A4	Q8R1A4	Dedicator of cytokinesis protein 7	Dock7;Dock7;Dock7	>sp|Q8R1A4|DOCK7_MOUSE Dedicator of cytokinesis protein 7 OS=Mus musculus GN=Dock7 PE=1 SV=3;>tr|A2A9M5|A2A9M5_MOUSE Dedicator of cytokinesis 7 OS=Mus musculus GN=Dock7 PE=4 SV=1;>sp|Q8R1A4-2|DOCK7_MOUSE Isoform 2 of Dedicator of cytokinesis protein 7 OS=M	0.745097	5.49351	0.376973	0	0.00478901	62.377	0.498842	0	1.23324e-05	119.32	0.319454	0	0.0114868	98.694	0.745097	5.49351	4.92044e-05	106.42		1	S	AESTQAMDRSCNRMSSHTETSSFLQTLTGRL	X;X;X;X;X;X;X;X;X;X;X;X;X;Oxidation (M);X;Phospho (STY);X;X;X;X;X;X;X;X;X;X;X;X;X;X;X	XXXXXXXXXXXXXPPPPPPPPPPPPPPPPPX	1.23324e-05	119.32	58.835	_M(ox)SS(ph)HTETSSFLQTLTGR_	MS(0.21)S(0.745)HT(0.04)ET(0.002)S(0.002)SFLQTLTGR	MS(-5.49)S(5.49)HT(-12.66)ET(-25.6)S(-26.44)S(-32.63)FLQT(-45.94)LT(-49.27)GR	3	2	989.932	-0.34473	0.72793	0.72793	NaN	NaN	0.70271	0.70271	NaN	NaN	1.2147
Q8R1A4;A2A9M5;Q8R1A4-2;E9PX48	968;968;968;938	Q8R1A4	Q8R1A4	Dedicator of cytokinesis protein 7	Dock7;Dock7;Dock7	>sp|Q8R1A4|DOCK7_MOUSE Dedicator of cytokinesis protein 7 OS=Mus musculus GN=Dock7 PE=1 SV=3;>tr|A2A9M5|A2A9M5_MOUSE Dedicator of cytokinesis 7 OS=Mus musculus GN=Dock7 PE=4 SV=1;>sp|Q8R1A4-2|DOCK7_MOUSE Isoform 2 of Dedicator of cytokinesis protein 7 OS=M	0.420631	0	0.311857	0	0.00162378	82.651	0.420631	0	8.92096e-05	95.409	0.36754	2.80206	0.0114868	98.694	0.195721	0	0.0016248	73.296			S	AMDRSCNRMSSHTETSSFLQTLTGRLPTKKL	X;X;X;X;X;X;X;X;Oxidation (M);X;X;X;X;X;X;Phospho (STY);X;X;X;X;X;X;X;X;X;X;X;X;X;X;X	XXXXXXXXPPPPPPPPPPPPPPPPPXXXXXX	8.92096e-05	98.694	80.534	_M(ox)SSHTETS(ph)SFLQTLTGR_	MS(0.04)S(0.04)HT(0.04)ET(0.04)S(0.421)S(0.421)FLQTLTGR	MS(-10.25)S(-10.25)HT(-10.25)ET(-10.25)S(0)S(0)FLQT(-42.91)LT(-68.75)GR	8	3	660.291	0.39752
Q8R1A4;A2A9M5;Q8R1A4-2;E9PX48	969;969;969;939	Q8R1A4	Q8R1A4	Dedicator of cytokinesis protein 7	Dock7;Dock7;Dock7	>sp|Q8R1A4|DOCK7_MOUSE Dedicator of cytokinesis protein 7 OS=Mus musculus GN=Dock7 PE=1 SV=3;>tr|A2A9M5|A2A9M5_MOUSE Dedicator of cytokinesis 7 OS=Mus musculus GN=Dock7 PE=4 SV=1;>sp|Q8R1A4-2|DOCK7_MOUSE Isoform 2 of Dedicator of cytokinesis protein 7 OS=M	0.878303	15.5737	0.431801	5.80366	0.00162378	82.651	0.878303	15.5737	8.92096e-05	95.409	0.555562	7.95892	5.1198e-05	103.39	0.193598	0	0.00250523	69.261		1	S	MDRSCNRMSSHTETSSFLQTLTGRLPTKKLF	X;X;X;X;X;X;X;Oxidation (M);X;X;X;X;X;X;X;Phospho (STY);X;X;X;X;X;X;X;X;X;X;X;X;X;X;X	XXXXXXXPPPPPPPPPPPPPPPPPXXXXXXX	5.1198e-05	103.39	84.493	_MSSHTETSS(ph)FLQTLTGR_	MS(0.024)S(0.024)HT(0.024)ET(0.024)S(0.024)S(0.878)FLQTLTGR	MS(-15.57)S(-15.57)HT(-15.57)ET(-15.57)S(-15.57)S(15.57)FLQT(-49.8)LT(-61.91)GR	9	3	654.959	0.3161	0.76061	0.76061	NaN	NaN	0.91375	0.91375	NaN	NaN	1.2147
Q8R1A4;A2A9M5;Q8R1A4-2;E9PX48;A2AW79;F6ZJ55	888;888;888;888;155;173	Q8R1A4	Q8R1A4	Dedicator of cytokinesis protein 7	Dock7;Dock7;Dock7;Dock7;Dock7	>sp|Q8R1A4|DOCK7_MOUSE Dedicator of cytokinesis protein 7 OS=Mus musculus GN=Dock7 PE=1 SV=3;>tr|A2A9M5|A2A9M5_MOUSE Dedicator of cytokinesis 7 OS=Mus musculus GN=Dock7 PE=4 SV=1;>sp|Q8R1A4-2|DOCK7_MOUSE Isoform 2 of Dedicator of cytokinesis protein 7 OS=M	1	135.859	1	142.427	0.00126863	142.43	1	144.65	0.00115601	144.65	1	132.875	0.00142031	139.43	1	135.859	0.000567322	162.36		1	S	SVHYATMARSAVRPASLNLNRSRSLSNSNPD	X;X;X;X;X;X;X;X;X;X;X;X;X;X;X;Phospho (STY);X;X;X;X;X;X;X;Phospho (STY);X;X;X;Phospho (STY);X;X;X	XXXXXXXXXPPPPPPPPPPPPXXXXXXXXXX	0.000567322	162.36	135.86	_PAS(ph)LNLNR_	PAS(1)LNLNR	PAS(135.86)LNLNR	3	2	482.734	-0.10503	0.73479	0.73479	NaN	NaN	0.77232	0.77232	NaN	NaN	0.94495
Q8R1A4;A2A9M5;Q8R1A4-2;E9PX48	1305;1305;1305;1275	Q8R1A4	Q8R1A4	Dedicator of cytokinesis protein 7	Dock7;Dock7;Dock7	>sp|Q8R1A4|DOCK7_MOUSE Dedicator of cytokinesis protein 7 OS=Mus musculus GN=Dock7 PE=1 SV=3;>tr|A2A9M5|A2A9M5_MOUSE Dedicator of cytokinesis 7 OS=Mus musculus GN=Dock7 PE=4 SV=1;>sp|Q8R1A4-2|DOCK7_MOUSE Isoform 2 of Dedicator of cytokinesis protein 7 OS=M	1	82.9144	1	74.5949	9.66978e-07	145.86	1	66.9868	0.000125349	138.01	1	66.9691	3.68056e-06	137.21	1	82.9144	3.87192e-11	186.05		1	S	MAIAGTSVPQLTRPGSFLLTSTSGRQHTTFS	X;X;X;X;X;X;X;X;X;X;X;X;X;X;X;Phospho (STY);X;X;X;X;X;X;X;X;X;X;X;X;X;X;X	XXXXXXXXXXXXXPPPPPPPPPPPPXXXXXX	3.87192e-11	186.05	186.05	_PGS(ph)FLLTSTSGR_	PGS(1)FLLTSTSGR	PGS(82.91)FLLT(-82.91)S(-97.34)T(-117.88)S(-123.37)GR	3	2	651.808	0.2775	1.0844	1.0844	NaN	NaN	1.2592	1.2592	NaN	NaN	NaN
Q8R1A4;A2A9M5;Q8R1A4-2;E9PX48	28;28;28;28	Q8R1A4	Q8R1A4	Dedicator of cytokinesis protein 7	Dock7;Dock7;Dock7	>sp|Q8R1A4|DOCK7_MOUSE Dedicator of cytokinesis protein 7 OS=Mus musculus GN=Dock7 PE=1 SV=3;>tr|A2A9M5|A2A9M5_MOUSE Dedicator of cytokinesis 7 OS=Mus musculus GN=Dock7 PE=4 SV=1;>sp|Q8R1A4-2|DOCK7_MOUSE Isoform 2 of Dedicator of cytokinesis protein 7 OS=M	0.849198	7.70595	0.646553	2.62282	0.000210335	112.67	0.560453	1.05925	0.0162851	55.864	0.637692	2.45614	0.000205226	113.01	0.849198	7.70595	0.000667683	90.561		1	S	RTVAAEVRKQISGQYSGSPQLLKNLNIVGNI	X;X;X;X;X;X;X;X;X;X;X;X;X;X;X;Phospho (STY);X;X;X;X;X;X;X;X;X;X;X;X;X;X;X	XXXXXXXXXPPPPPPPPPPPPPPXXXXXXXX	0.000205226	113.01	50.966	_QISGQYS(ph)GSPQLLK_	QIS(0.001)GQY(0.006)S(0.849)GS(0.144)PQLLK	QIS(-32.03)GQY(-21.33)S(7.71)GS(-7.71)PQLLK	7	2	793.385	0.56662	0.76255	0.76255	NaN	NaN	0.73724	0.73724	NaN	NaN	0.65876
Q8R1A4;A2A9M5;Q8R1A4-2;E9PX48	30;30;30;30	Q8R1A4	Q8R1A4	Dedicator of cytokinesis protein 7	Dock7;Dock7;Dock7	>sp|Q8R1A4|DOCK7_MOUSE Dedicator of cytokinesis protein 7 OS=Mus musculus GN=Dock7 PE=1 SV=3;>tr|A2A9M5|A2A9M5_MOUSE Dedicator of cytokinesis 7 OS=Mus musculus GN=Dock7 PE=4 SV=1;>sp|Q8R1A4-2|DOCK7_MOUSE Isoform 2 of Dedicator of cytokinesis protein 7 OS=M	0.997692	26.3591	0.994942	22.9379	1.74507e-14	158.17	0.997692	26.3591	4.41898e-19	185.02	0.98497	18.2148	1.65712e-14	156	0.939839	11.9381	0.000605596	92.211		1	S	VAAEVRKQISGQYSGSPQLLKNLNIVGNISH	X;X;X;X;X;X;X;X;X;X;X;X;X;X;X;Phospho (STY);X;X;X;X;X;X;X;X;X;X;X;X;X;X;X	XXXXXXXPPPPPPPPPPPPPPXXXXXXXXXX	4.41898e-19	185.02	157.54	_QISGQYSGS(ph)PQLLK_	QISGQYS(0.002)GS(0.998)PQLLK	QIS(-85.85)GQY(-63.52)S(-26.36)GS(26.36)PQLLK	9	2	793.385	0.61442	2.4861	2.4861	NaN	NaN	3.1239	3.1239	NaN	NaN	0.65876
Q8R1A4;A2A9M5;Q8R1A4-2;E9PX48;A2AW79;F6ZJ55	896;896;896;896;163;181	Q8R1A4	Q8R1A4	Dedicator of cytokinesis protein 7	Dock7;Dock7;Dock7;Dock7;Dock7	>sp|Q8R1A4|DOCK7_MOUSE Dedicator of cytokinesis protein 7 OS=Mus musculus GN=Dock7 PE=1 SV=3;>tr|A2A9M5|A2A9M5_MOUSE Dedicator of cytokinesis 7 OS=Mus musculus GN=Dock7 PE=4 SV=1;>sp|Q8R1A4-2|DOCK7_MOUSE Isoform 2 of Dedicator of cytokinesis protein 7 OS=M	0.736517	7.47462	0.736517	7.47462	1.3328e-55	178.46	0.462351	0	1.60342e-08	118.57	0.500364	0	1.81474e-23	146.8	0.512515	0	5.41726e-149	249.48		1;2	S	RSAVRPASLNLNRSRSLSNSNPDISGTPTSP	X;X;X;X;X;X;X;Phospho (STY);X;X;X;X;X;X;X;Phospho (STY);X;X;X;Phospho (STY);X;X;X;X;X;X;X;X;X;X;X	XXXXXXXXXXXXXXXPPPPPPPPPPPPPPPP	5.41726e-149	249.48	143.05	_S(ph)LSNSNPDISGTPTSPDDEVR_	S(0.737)LS(0.132)NS(0.132)NPDISGTPTSPDDEVR	S(7.47)LS(-7.47)NS(-7.47)NPDIS(-67.86)GT(-75.46)PT(-71.63)S(-76.68)PDDEVR	1	2	1134.49	-0.29931	1.9518	1.9518	0.63475	NaN	2.5766	2.5766	0.62336	NaN	NaN
Q8R1A4;A2A9M5;Q8R1A4-2;E9PX48;A2AW79;F6ZJ55	898;898;898;898;165;183	Q8R1A4	Q8R1A4	Dedicator of cytokinesis protein 7	Dock7;Dock7;Dock7;Dock7;Dock7	>sp|Q8R1A4|DOCK7_MOUSE Dedicator of cytokinesis protein 7 OS=Mus musculus GN=Dock7 PE=1 SV=3;>tr|A2A9M5|A2A9M5_MOUSE Dedicator of cytokinesis 7 OS=Mus musculus GN=Dock7 PE=4 SV=1;>sp|Q8R1A4-2|DOCK7_MOUSE Isoform 2 of Dedicator of cytokinesis protein 7 OS=M	0.512515	0	0.333328	0	1.3328e-55	178.46	0.462351	0	1.60342e-08	118.57	0.500364	0	1.81474e-23	146.8	0.512515	0	5.41726e-149	249.48		2	S	AVRPASLNLNRSRSLSNSNPDISGTPTSPDD	X;X;X;X;X;Phospho (STY);X;X;X;X;X;X;X;X;X;X;X;X;X;X;X;X;X;X;X;X;X;X;X;X;X	XXXXXXXXXXXXXXXXXXXXXXXXXXXXXXX	5.41726e-149	249.48	157.64	_S(ph)LSNS(ph)NPDISGTPTSPDDEVR_	S(0.513)LS(0.513)NS(0.975)NPDISGTPTSPDDEVR	S(0)LS(0)NS(12.9)NPDIS(-65.97)GT(-70.75)PT(-84.72)S(-104.68)PDDEVR	3	2	1174.47	0.084355	0.63475	NaN	0.63475	NaN	0.62336	NaN	0.62336	NaN	NaN
Q8R1A4;A2A9M5;Q8R1A4-2;E9PX48;A2AW79;F6ZJ55	900;900;900;900;167;185	Q8R1A4	Q8R1A4	Dedicator of cytokinesis protein 7	Dock7;Dock7;Dock7;Dock7;Dock7	>sp|Q8R1A4|DOCK7_MOUSE Dedicator of cytokinesis protein 7 OS=Mus musculus GN=Dock7 PE=1 SV=3;>tr|A2A9M5|A2A9M5_MOUSE Dedicator of cytokinesis 7 OS=Mus musculus GN=Dock7 PE=4 SV=1;>sp|Q8R1A4-2|DOCK7_MOUSE Isoform 2 of Dedicator of cytokinesis protein 7 OS=M	0.99927	28.3665	0.333328	0	1.3328e-55	178.46					0.99927	28.3665	1.81474e-23	146.8	0.999087	33.4023	1.13608e-162	255.58		1;2	S	RPASLNLNRSRSLSNSNPDISGTPTSPDDEV	X;X;X;Phospho (STY);X;X;X;X;X;X;X;Phospho (STY);X;X;X;Phospho (STY);X;X;X;X;X;X;X;X;X;X;X;X;X;X;X	XXXXXXXXXXXPPPPPPPPPPPPPPPPPPPP	1.13608e-162	255.58	146.8	_S(ph)LSNS(ph)NPDISGTPTSPDDEVR_	S(0.5)LS(0.5)NS(0.999)NPDISGTPTSPDDEVR	S(0)LS(0)NS(28.37)NPDIS(-56.05)GT(-68.58)PT(-74.57)S(-79.14)PDDEVR	5	2	1174.47	0.34406	0.67187	0.67187	0.63475	NaN	0.6445	0.6445	0.62336	NaN	NaN
Q8R1A4;A2A9M5;Q8R1A4-2;E9PX48	180;180;180;180	Q8R1A4	Q8R1A4	Dedicator of cytokinesis protein 7	Dock7;Dock7;Dock7	>sp|Q8R1A4|DOCK7_MOUSE Dedicator of cytokinesis protein 7 OS=Mus musculus GN=Dock7 PE=1 SV=3;>tr|A2A9M5|A2A9M5_MOUSE Dedicator of cytokinesis 7 OS=Mus musculus GN=Dock7 PE=4 SV=1;>sp|Q8R1A4-2|DOCK7_MOUSE Isoform 2 of Dedicator of cytokinesis protein 7 OS=M	1	108.012	0.999991	50.3446	2.06699e-06	165.63	1	94.5515	3.37857e-05	154.15	1	73.7256	0.0132237	104.17	1	108.012	8.38959e-05	150.04		1;2	S	DGSSYQDEQDDLKRRSMSIDDTPRGSWACSI	X;X;X;X;X;X;X;X;X;X;X;X;X;X;X;Phospho (STY);Oxidation (M);Phospho (STY);X;X;X;X;X;X;X;X;X;X;X;X;X	XXXXXXXXXXXXXXXPPPPPPPPPXXXXXXX	2.06699e-06	165.63	135.02	_S(ph)MS(ph)IDDTPR_	S(1)MS(1)IDDTPR	S(108.01)MS(75.9)IDDT(-75.9)PR	1	2	591.201	0.19241	1.0799	1.0799	0.88787	NaN	1.1952	1.1952	0.85529	NaN	NaN
Q8R1A4;A2A9M5;Q8R1A4-2;E9PX48	182;182;182;182	Q8R1A4	Q8R1A4	Dedicator of cytokinesis protein 7	Dock7;Dock7;Dock7	>sp|Q8R1A4|DOCK7_MOUSE Dedicator of cytokinesis protein 7 OS=Mus musculus GN=Dock7 PE=1 SV=3;>tr|A2A9M5|A2A9M5_MOUSE Dedicator of cytokinesis 7 OS=Mus musculus GN=Dock7 PE=4 SV=1;>sp|Q8R1A4-2|DOCK7_MOUSE Isoform 2 of Dedicator of cytokinesis protein 7 OS=M	1	75.9015	0.999935	42.5768	0.0109548	80.979	1	67.4242	0.0043194	115.14	0.999999	58.9438	0.0132237	104.17	1	75.9015	0.000645826	145.31		1;2	S	SSYQDEQDDLKRRSMSIDDTPRGSWACSIFD	X;X;X;X;X;X;X;X;X;X;X;X;X;Phospho (STY);Oxidation (M);Phospho (STY);X;X;X;X;X;X;X;X;X;X;X;X;X;X;X	XXXXXXXXXXXXXPPPPPPPPPXXXXXXXXX	0.000280887	145.31	135.02	_S(ph)MS(ph)IDDTPR_	S(1)MS(1)IDDTPR	S(108.01)MS(75.9)IDDT(-75.9)PR	3	2	591.201	0.19241	0.41694	0.41694	0.88787	NaN	0.49088	0.49088	0.85529	NaN	NaN
Q8R1A4;A2A9M5;Q8R1A4-2;A2AW79	927;927;927;194	Q8R1A4	Q8R1A4	Dedicator of cytokinesis protein 7	Dock7;Dock7;Dock7	>sp|Q8R1A4|DOCK7_MOUSE Dedicator of cytokinesis protein 7 OS=Mus musculus GN=Dock7 PE=1 SV=3;>tr|A2A9M5|A2A9M5_MOUSE Dedicator of cytokinesis 7 OS=Mus musculus GN=Dock7 PE=4 SV=1;>sp|Q8R1A4-2|DOCK7_MOUSE Isoform 2 of Dedicator of cytokinesis protein 7 OS=M	0.641814	2.53301													0.641814	2.53301	0.000995891	100.22		1	S	DDEVRSIIGSKGLDRSNSWVNTGPKAAPWGS	X;X;X;X;X;X;X;X;X;X;X;X;X;X;X;Phospho (STY);X;X;X;X;X;X;X;X;X;X;X;X;X;X;X	XXXXXXXXXXXXXXXPPPPPPPPPPXXXXXX	0.000995891	100.22	100.22	_S(ph)NSWVNTGPK_	S(0.642)NS(0.358)WVNTGPK	S(2.53)NS(-2.53)WVNT(-72.36)GPK	1	2	585.253	0.46223	1.1571	1.1571	NaN	NaN	1.0797	1.0797	NaN	NaN	NaN
Q8R1A4;A2A9M5;Q8R1A4-2;A2AW79	929;929;929;196	Q8R1A4	Q8R1A4	Dedicator of cytokinesis protein 7	Dock7;Dock7;Dock7	>sp|Q8R1A4|DOCK7_MOUSE Dedicator of cytokinesis protein 7 OS=Mus musculus GN=Dock7 PE=1 SV=3;>tr|A2A9M5|A2A9M5_MOUSE Dedicator of cytokinesis 7 OS=Mus musculus GN=Dock7 PE=4 SV=1;>sp|Q8R1A4-2|DOCK7_MOUSE Isoform 2 of Dedicator of cytokinesis protein 7 OS=M	0.999999	60.6899	0.999802	37.069	0.0237078	85.536	0.999999	60.6899	0.00273791	124.42	0.999871	38.9026	0.00103458	99.531	0.999967	44.8589	0.00120628	97.86		1	S	EVRSIIGSKGLDRSNSWVNTGPKAAPWGSNP	X;X;X;X;X;X;X;X;X;X;X;X;X;X;X;Phospho (STY);X;X;X;X;X;X;X;X;X;X;X;X;X;X;X	XXXXXXXXXXXXXPPPPPPPPPPXXXXXXXX	0.00103458	124.42	124.42	_SNS(ph)WVNTGPK_	SNS(1)WVNTGPK	S(-60.69)NS(60.69)WVNT(-78.35)GPK	3	2	585.253	1.0136	1.3127	1.3127	NaN	NaN	1.3107	1.3107	NaN	NaN	NaN
Q8R1A4;A2A9M5;Q8R1A4-2;E9PX48;A2A9M4	1420;1420;1420;1390;17	Q8R1A4	Q8R1A4	Dedicator of cytokinesis protein 7	Dock7;Dock7;Dock7;Dock7	>sp|Q8R1A4|DOCK7_MOUSE Dedicator of cytokinesis protein 7 OS=Mus musculus GN=Dock7 PE=1 SV=3;>tr|A2A9M5|A2A9M5_MOUSE Dedicator of cytokinesis 7 OS=Mus musculus GN=Dock7 PE=4 SV=1;>sp|Q8R1A4-2|DOCK7_MOUSE Isoform 2 of Dedicator of cytokinesis protein 7 OS=M	0.999307	31.5907	0.997281	25.6442	3.22577e-106	262.42	0.999307	31.5907	1.71064e-90	259.08	0.993087	24.1268	5.58884e-41	221.59	0.825912	6.76167	7.8957e-49	224.59		1;2	S	ARQEMVRRSRGQLERSPSGSAFGSQENLRWR	X;X;X;X;X;X;X;X;X;X;X;X;X;X;X;Phospho (STY);X;X;X;X;X;X;X;Phospho (STY);X;X;X;X;X;X;X	XXXXXXXXXXXXXXXPPPPPPPPPPPPPPXX	3.22577e-106	262.42	197.17	_S(ph)PSGSAFGSQENLR_	S(0.999)PS(0.001)GSAFGSQENLR	S(31.59)PS(-31.59)GS(-79.98)AFGS(-158.76)QENLR	1	2	758.825	-0.06255	1.4413	1.4413	3.6458	NaN	1.6287	1.6287	4.8525	NaN	0.80116
Q8R1A4;A2A9M5;Q8R1A4-2;E9PX48;A2A9M4	1422;1422;1422;1392;19	Q8R1A4	Q8R1A4	Dedicator of cytokinesis protein 7	Dock7;Dock7;Dock7;Dock7	>sp|Q8R1A4|DOCK7_MOUSE Dedicator of cytokinesis protein 7 OS=Mus musculus GN=Dock7 PE=1 SV=3;>tr|A2A9M5|A2A9M5_MOUSE Dedicator of cytokinesis 7 OS=Mus musculus GN=Dock7 PE=4 SV=1;>sp|Q8R1A4-2|DOCK7_MOUSE Isoform 2 of Dedicator of cytokinesis protein 7 OS=M	0.998399	27.9499	0.992735	21.3561	3.86265e-61	238.83	0.998399	27.9499	1.99017e-74	247.38	0.963099	14.1666	4.15119e-49	227.67	0.995402	23.4151	1.2965e-30	206.63		1;2	S	QEMVRRSRGQLERSPSGSAFGSQENLRWRKD	X;X;X;X;X;X;X;X;X;X;X;X;X;X;X;Phospho (STY);X;X;X;X;X;Phospho (STY);X;X;X;X;X;X;X;X;X	XXXXXXXXXXXXXPPPPPPPPPPPPPPXXXX	1.99017e-74	247.38	220.27	_SPS(ph)GSAFGSQENLR_	S(0.002)PS(0.998)GSAFGSQENLR	S(-27.95)PS(27.95)GS(-76.39)AFGS(-167.53)QENLR	3	2	758.825	0.37519	1.2804	1.2804	0.34283	NaN	1.4811	1.4811	0.33707	NaN	0.80116
Q8R1A4;A2A9M5;Q8R1A4-2;E9PX48;A2A9M4	1428;1428;1428;1398;25	Q8R1A4	Q8R1A4	Dedicator of cytokinesis protein 7	Dock7;Dock7;Dock7;Dock7	>sp|Q8R1A4|DOCK7_MOUSE Dedicator of cytokinesis protein 7 OS=Mus musculus GN=Dock7 PE=1 SV=3;>tr|A2A9M5|A2A9M5_MOUSE Dedicator of cytokinesis 7 OS=Mus musculus GN=Dock7 PE=4 SV=1;>sp|Q8R1A4-2|DOCK7_MOUSE Isoform 2 of Dedicator of cytokinesis protein 7 OS=M	0.999997	55.0749	0.998276	29.7726	0.0243851	67.418					0.999997	55.0749	1.87391e-14	161.35	0.999932	41.8753	0.00287467	93.371		1;2	S	SRGQLERSPSGSAFGSQENLRWRKDMTHWRQ	X;X;X;X;X;X;X;Phospho (STY);X;Phospho (STY);X;X;X;X;X;Phospho (STY);X;X;X;X;X;X;X;X;X;X;X;X;X;X;X	XXXXXXXPPPPPPPPPPPPPPXXXXXXXXXX	1.87391e-14	161.35	161.35	_SPSGSAFGS(ph)QENLR_	SPSGSAFGS(1)QENLR	S(-77.21)PS(-72.04)GS(-55.07)AFGS(55.07)QENLR	9	2	758.825	-0.27682	0.2659	0.2659	0.36549	NaN	0.27129	0.27129	0.35349	NaN	0.80116
Q8R1A4;A2A9M5;Q8R1A4-2;E9PX48	452;452;452;452	Q8R1A4	Q8R1A4	Dedicator of cytokinesis protein 7	Dock7;Dock7;Dock7	>sp|Q8R1A4|DOCK7_MOUSE Dedicator of cytokinesis protein 7 OS=Mus musculus GN=Dock7 PE=1 SV=3;>tr|A2A9M5|A2A9M5_MOUSE Dedicator of cytokinesis 7 OS=Mus musculus GN=Dock7 PE=4 SV=1;>sp|Q8R1A4-2|DOCK7_MOUSE Isoform 2 of Dedicator of cytokinesis protein 7 OS=M	0.993105	22.6293	0.978449	19.5832	3.64633e-06	127.61	0.993105	22.6293	0.000258074	109.42	0.947954	15.6143	1.88848e-09	141.34	0.987171	21.8722	6.3464e-08	136.39		1	S	RNSSLVGRRSLERTTSGDDACNLTSFRPATL	X;X;Phospho (STY);Phospho (STY);X;X;X;X;X;X;X;X;X;X;X;Phospho (STY);X;X;X;X;X;X;X;X;X;X;X;X;X;X;X	XXXXXXXXXXXXXPPPPPPPPPPPPPPXXXX	1.88848e-09	141.34	103.14	_TTS(ph)GDDACNLTSFR_	T(0.001)T(0.005)S(0.993)GDDACNLTSFR	T(-28.28)T(-22.63)S(22.63)GDDACNLT(-68.64)S(-82.2)FR	3	2	812.819	0.30375	1.0863	1.0863	NaN	NaN	1.3433	1.3433	NaN	NaN	NaN
P58058;A2A9P0	64;64	P58058	P58058	NAD kinase	Nadk;Nadk	>sp|P58058|NADK_MOUSE NAD kinase OS=Mus musculus GN=Nadk PE=1 SV=2;>tr|A2A9P0|A2A9P0_MOUSE NAD kinase (Fragment) OS=Mus musculus GN=Nadk PE=4 SV=1	1	87.9496	1	88.9843	5.5663e-11	145.86	1	92.3478	0.000288494	106.82	1	74.3217	0.00126787	79.652	1	87.9496	0.000108836	119.65		1	S	ASPALGSTKEFRRTRSLHGPCPVTTFGPKAC	X;X;X;X;X;X;X;X;X;X;X;X;X;X;X;Phospho (STY);X;X;X;X;X;X;X;X;X;X;X;X;X;X;X	XXXXXXXXXXXXXXXPPPPPPPPPPPPPPXX	5.5663e-11	145.86	119.65	_S(ph)LHGPCPVTTFGPK_	S(1)LHGPCPVTTFGPK	S(87.95)LHGPCPVT(-87.95)T(-91.67)FGPK	1	2	789.363	-0.63179	1.0504	1.0504	NaN	NaN	1.0101	1.0101	NaN	NaN	NaN
P58058;A2A9P0;A2A9N9	46;46;46	P58058	P58058	NAD kinase	Nadk;Nadk;Nadk	>sp|P58058|NADK_MOUSE NAD kinase OS=Mus musculus GN=Nadk PE=1 SV=2;>tr|A2A9P0|A2A9P0_MOUSE NAD kinase (Fragment) OS=Mus musculus GN=Nadk PE=4 SV=1;>tr|A2A9N9|A2A9N9_MOUSE NAD kinase (Fragment) OS=Mus musculus GN=Nadk PE=4 SV=1	0.882714	8.76594									0.882714	8.76594	0.000419911	92.939						1	S	TWSYNHPIRGRAKSRSLSASPALGSTKEFRR	X;X;X;X;X;X;X;X;X;X;X;X;X;X;X;Phospho (STY);X;X;X;X;X;X;X;X;X;X;X;X;X;X;X	XXXXXXXXXXXXXXXPPPPPPPPPPPPXXXX	0.000419911	92.939	92.939	_S(ph)LSASPALGSTK_	S(0.883)LS(0.117)ASPALGSTK	S(8.77)LS(-8.77)AS(-52.46)PALGS(-80.92)T(-85.71)K	1	2	599.789	1.0905	1.6702	1.6702	NaN	NaN	1.6327	1.6327	NaN	NaN	NaN
P58058;A2A9P0;A2A9N9	48;48;48	P58058	P58058	NAD kinase	Nadk;Nadk;Nadk	>sp|P58058|NADK_MOUSE NAD kinase OS=Mus musculus GN=Nadk PE=1 SV=2;>tr|A2A9P0|A2A9P0_MOUSE NAD kinase (Fragment) OS=Mus musculus GN=Nadk PE=4 SV=1;>tr|A2A9N9|A2A9N9_MOUSE NAD kinase (Fragment) OS=Mus musculus GN=Nadk PE=4 SV=1	0.999939	42.7929	0.981026	18.9235	0.00222908	77.192					0.999939	42.7929	7.47897e-05	107.99						1	S	SYNHPIRGRAKSRSLSASPALGSTKEFRRTR	X;X;X;X;X;X;X;X;X;X;X;X;X;X;X;Phospho (STY);X;X;X;X;X;X;X;X;X;X;X;X;X;X;X	XXXXXXXXXXXXXPPPPPPPPPPPPXXXXXX	7.47897e-05	107.99	101.62	_SLS(ph)ASPALGSTK_	SLS(1)ASPALGSTK	S(-51.47)LS(42.79)AS(-42.79)PALGS(-61.07)T(-62.11)K	3	2	599.789	1.0514	0.59865	0.59865	NaN	NaN	0.59835	0.59835	NaN	NaN	NaN
P24788;A2A9P6	270;236	P24788	P24788	Cyclin-dependent kinase 11B	Cdk11b;Cdk11b	>sp|P24788|CD11B_MOUSE Cyclin-dependent kinase 11B OS=Mus musculus GN=Cdk11b PE=1 SV=2;>tr|A2A9P6|A2A9P6_MOUSE Cell division cycle 2-like 1 OS=Mus musculus GN=Cdk11b PE=4 SV=1	0.999879	41.436					0.999414	32.3986	1.36171e-14	168.08					0.999879	41.436	1.77893e-14	159.01		1	S	EKVEERDLLSDLQDISDSERKTSSAESSSAE	X;X;X;X;X;X;X;X;X;X;X;X;X;X;X;Phospho (STY);X;X;X;X;X;X;X;X;X;X;X;X;X;X;X	XXXXXXPPPPPPPPPPPPPPXXXXXXXXXXX	1.36171e-14	168.08	119.68	_DLLSDLQDIS(ph)DSER_	DLLSDLQDIS(1)DSER	DLLS(-41.44)DLQDIS(41.44)DS(-43.09)ER	10	2	843.367	0.24996	0.85849	0.85849	NaN	NaN	0.94767	0.94767	NaN	NaN	NaN
P24788;A2A9P6	47;13	P24788	P24788	Cyclin-dependent kinase 11B	Cdk11b;Cdk11b	>sp|P24788|CD11B_MOUSE Cyclin-dependent kinase 11B OS=Mus musculus GN=Cdk11b PE=1 SV=2;>tr|A2A9P6|A2A9P6_MOUSE Cell division cycle 2-like 1 OS=Mus musculus GN=Cdk11b PE=4 SV=1	1	68.8092	1	40.7514	5.5558e-08	179.65	1	62.6801	5.86247e-05	136.6	1	49.2981	0.000111526	122.78	1	68.8092	1.61833e-05	157.23		1	S	IKRLKNSDDRDSKRDSLEEGELRDHRMEITI	X;X;X;X;X;X;X;X;X;X;X;X;X;X;X;Phospho (STY);X;X;X;X;X;X;X;X;X;X;X;X;X;X;X	XXXXXXXXXXXXXPPPPPPPPPPXXXXXXXX	5.5558e-08	179.65	68.809	_RDS(ph)LEEGELR_	RDS(1)LEEGELR	RDS(68.81)LEEGELR	3	3	428.526	-0.080754	0.85369	0.85369	NaN	NaN	0.97499	0.97499	NaN	NaN	NaN
P24788;A2A9P6;P24788-2	741;707;396	P24788	P24788	Cyclin-dependent kinase 11B	Cdk11b;Cdk11b	>sp|P24788|CD11B_MOUSE Cyclin-dependent kinase 11B OS=Mus musculus GN=Cdk11b PE=1 SV=2;>tr|A2A9P6|A2A9P6_MOUSE Cell division cycle 2-like 1 OS=Mus musculus GN=Cdk11b PE=4 SV=1;>sp|P24788-2|CD11B_MOUSE Isoform 2 of Cyclin-dependent kinase 11B OS=Mus musculu	0.543668	0.760534					0.499997	0	1.29549e-17	140.35					0.543668	0.760534	8.4558e-18	142.31		1	S	TWPAKSEQQRVKRGTSPRPPEGGLGYSQLGD	X;X;X;X;X;X;X;X;X;X;X;X;X;X;X;Phospho (STY);X;X;X;X;X;X;X;X;X;X;X;X;X;X;X	XXXXXXXXXXXXXPPPPPPPPPPPPPPPPPP	8.4558e-18	142.31	116.98	_GTS(ph)PRPPEGGLGYSQLGDDDLK_	GT(0.456)S(0.544)PRPPEGGLGYSQLGDDDLK	GT(-0.76)S(0.76)PRPPEGGLGY(-68.32)S(-89.07)QLGDDDLK	3	3	780.357	-0.01276	0.87238	0.87238	NaN	NaN	0.8591	0.8591	NaN	NaN	NaN
Q8R516;Q8R516-2;A2A9P8;Q8R516-3	251;251;76;251	Q8R516	Q8R516	E3 ubiquitin-protein ligase MIB2	Mib2;Mib2	>sp|Q8R516|MIB2_MOUSE E3 ubiquitin-protein ligase MIB2 OS=Mus musculus GN=Mib2 PE=1 SV=2;>sp|Q8R516-2|MIB2_MOUSE Isoform 2 of E3 ubiquitin-protein ligase MIB2 OS=Mus musculus GN=Mib2;>tr|A2A9P8|A2A9P8_MOUSE E3 ubiquitin-protein ligase MIB2 (Fragment) OS=Mu	1	100.454	1	109.104	0.000124307	132.08	1	158.925	1.18222e-07	158.93	1	105.137	9.65401e-05	140.31	1	100.454	3.742e-05	145.1		1	S	HLPKLGKPAELQRRVSADGQPFQRGDKVKCL	X;X;X;X;X;X;X;X;X;X;X;X;X;X;X;Phospho (STY);X;X;X;X;X;X;X;X;X;X;X;X;X;X;X	XXXXXXXXXXXXXPPPPPPPPPPPXXXXXXX	1.18222e-07	158.93	100.45	_RVS(ph)ADGQPFQR_	RVS(1)ADGQPFQR	RVS(100.45)ADGQPFQR	3	2	670.809	0.30351	0.47889	0.47889	NaN	NaN	0.53572	0.53572	NaN	NaN	NaN
A2A9Q2;Q8BHG1;A6PWC3	85;85;85	A2A9Q2	A2A9Q2	Nardilysin	Nrd1;Nrd1;Nrd1	>tr|A2A9Q2|A2A9Q2_MOUSE Nardilysin OS=Mus musculus GN=Nrd1 PE=3 SV=1;>sp|Q8BHG1|NRDC_MOUSE Nardilysin OS=Mus musculus GN=Nrd1 PE=1 SV=1;>tr|A6PWC3|A6PWC3_MOUSE Nardilysin OS=Mus musculus GN=Nrd1 PE=3 SV=1	1	152.876	1	168.885	5.42976e-10	188.13	1	160.843	2.46393e-06	175.29	1	150.265	1.86213e-06	177.38	1	152.876	1.24763e-06	179.5		1	S	DLGESGRLARLGADESEEEGRSFSNVGDPEI	X;X;X;X;X;X;X;X;X;X;X;X;X;X;X;Phospho (STY);X;X;X;X;X;X;X;X;X;X;X;X;X;X;X	XXXXXXXXXXPPPPPPPPPPPXXXXXXXXXX	5.42976e-10	188.13	152.88	_LGADES(ph)EEEGR_	LGADES(1)EEEGR	LGADES(152.88)EEEGR	6	2	636.243	-0.15383	0.9078	0.9078	NaN	NaN	0.94092	0.94092	NaN	NaN	0.87375
Q6NXN1;A2AA85;Q6NXN1-2;A2AA86	105;99;86;85	Q6NXN1	Q6NXN1	UPF0485 protein C1orf144 homolog	D4Ertd22e;D4Ertd22e;D4Ertd22e	>sp|Q6NXN1|SZRD1_MOUSE SUZ domain-containing protein 1 OS=Mus musculus GN=Szrd1 PE=1 SV=1;>tr|A2AA85|A2AA85_MOUSE Novel protein (D4Ertd22e) (Fragment) OS=Mus musculus GN=Szrd1 PE=4 SV=1;>sp|Q6NXN1-2|SZRD1_MOUSE Isoform 2 of SUZ domain-containing protein 1	0.801276	6.05542	0.486115	0	0.00840201	44.587	0.763286	5.14605	3.64796e-06	84.653					0.801276	6.05542	3.74855e-06	84.327		1	S	QREAEYAEARRRILGSASPEEEQEKPILDRP	X;X;X;X;X;X;X;X;X;X;X;X;X;X;X;Phospho (STY);X;X;X;X;X;X;X;X;X;X;X;X;X;X;X	XXXXXXXXXXXXPPPPPPPPPPPPPPPPPPP	3.64796e-06	84.653	84.327	_ILGS(ph)ASPEEEQEKPILDRPTR_	ILGS(0.801)AS(0.199)PEEEQEKPILDRPTR	ILGS(6.06)AS(-6.06)PEEEQEKPILDRPT(-52.97)R	4	3	815.739	-0.10831	0.75595	0.75595	NaN	NaN	0.88825	0.88825	NaN	NaN	0.73074
Q6NXN1;A2AA85;Q6NXN1-2;A2AA86	107;101;88;87	Q6NXN1	Q6NXN1	UPF0485 protein C1orf144 homolog	D4Ertd22e;D4Ertd22e;D4Ertd22e	>sp|Q6NXN1|SZRD1_MOUSE SUZ domain-containing protein 1 OS=Mus musculus GN=Szrd1 PE=1 SV=1;>tr|A2AA85|A2AA85_MOUSE Novel protein (D4Ertd22e) (Fragment) OS=Mus musculus GN=Szrd1 PE=4 SV=1;>sp|Q6NXN1-2|SZRD1_MOUSE Isoform 2 of SUZ domain-containing protein 1	0.869406	9.38381	0.869406	9.38381	0.00685986	46.514	0.676501	3.20396	3.64796e-06	84.653	0.390453	0.456426	0.0618133	31.402	0.791425	5.88685	0.000237267	67.644		1	S	EAEYAEARRRILGSASPEEEQEKPILDRPTR	X;X;X;X;X;X;X;X;X;X;X;X;X;X;X;Phospho (STY);X;X;X;X;X;X;X;X;X;X;X;X;X;X;X	XXXXXXXXXXPPPPPPPPPPPPPPPPPPPPP	3.64796e-06	84.653	46.514	_ILGSAS(ph)PEEEQEKPILDRPTR_	ILGS(0.1)AS(0.869)PEEEQEKPILDRPT(0.03)R	ILGS(-9.38)AS(9.38)PEEEQEKPILDRPT(-14.56)R	6	3	815.739	-0.50236	0.63813	0.63813	NaN	NaN	0.71562	0.71562	NaN	NaN	0.73074
Q6NXN1;A2AA85;Q6NXN1-2;A2AA86	37;31;18;17	Q6NXN1	Q6NXN1	UPF0485 protein C1orf144 homolog	D4Ertd22e;D4Ertd22e;D4Ertd22e	>sp|Q6NXN1|SZRD1_MOUSE SUZ domain-containing protein 1 OS=Mus musculus GN=Szrd1 PE=1 SV=1;>tr|A2AA85|A2AA85_MOUSE Novel protein (D4Ertd22e) (Fragment) OS=Mus musculus GN=Szrd1 PE=4 SV=1;>sp|Q6NXN1-2|SZRD1_MOUSE Isoform 2 of SUZ domain-containing protein 1	0.872102	8.33714					0.872102	8.33714	2.48683e-26	138.82										1	S	RLEKKLKITQKESRKSKSPPKVPIVIQDDSL	X;X;X;X;X;X;X;X;X;X;X;X;X;X;X;Phospho (STY);X;Phospho (STY);X;X;X;X;X;X;X;X;X;X;X;Phospho (STY);X	XXXXXXXXXXXXXXXPPPPPPPPPPPPPPPP	2.48683e-26	138.82	138.82	_S(ph)KSPPKVPIVIQDDSLPTGPPPQIR_	S(0.872)KS(0.128)PPKVPIVIQDDSLPTGPPPQIR	S(8.34)KS(-8.34)PPKVPIVIQDDS(-54.46)LPT(-94.22)GPPPQIR	1	3	916.156	-0.00179	0.61729	0.61729	NaN	NaN	0.7962	0.7962	NaN	NaN	NaN
Q6NXN1;A2AA85;Q6NXN1-2;A2AA86	39;33;20;19	Q6NXN1	Q6NXN1	UPF0485 protein C1orf144 homolog	D4Ertd22e;D4Ertd22e;D4Ertd22e	>sp|Q6NXN1|SZRD1_MOUSE SUZ domain-containing protein 1 OS=Mus musculus GN=Szrd1 PE=1 SV=1;>tr|A2AA85|A2AA85_MOUSE Novel protein (D4Ertd22e) (Fragment) OS=Mus musculus GN=Szrd1 PE=4 SV=1;>sp|Q6NXN1-2|SZRD1_MOUSE Isoform 2 of SUZ domain-containing protein 1	0.999478	32.8207	0.959872	13.7878	1.46096e-15	130.43	0.999478	32.8207	5.29155e-36	157.57					0.963332	14.1948	8.08896e-16	133.16		1	S	EKKLKITQKESRKSKSPPKVPIVIQDDSLPT	X;X;X;X;X;X;X;X;X;X;X;X;X;X;X;Phospho (STY);X;X;X;X;X;X;X;X;X;X;X;X;X;X;X	XXXXXXXXXXXXXPPPPPPPPPPPPPPPPPP	5.29155e-36	157.57	135.49	_S(ph)PPKVPIVIQDDSLPTGPPPQIR_	S(0.999)PPKVPIVIQDDS(0.001)LPTGPPPQIR	S(32.82)PPKVPIVIQDDS(-32.82)LPT(-96.55)GPPPQIR	1	3	844.447	-0.20976	0.62803	0.62803	NaN	NaN	0.83109	0.83109	NaN	NaN	NaN
Q6NXN1;A2AA85;Q6NXN1-2;A2AA86	51;45;32;31	Q6NXN1	Q6NXN1	UPF0485 protein C1orf144 homolog	D4Ertd22e;D4Ertd22e;D4Ertd22e	>sp|Q6NXN1|SZRD1_MOUSE SUZ domain-containing protein 1 OS=Mus musculus GN=Szrd1 PE=1 SV=1;>tr|A2AA85|A2AA85_MOUSE Novel protein (D4Ertd22e) (Fragment) OS=Mus musculus GN=Szrd1 PE=4 SV=1;>sp|Q6NXN1-2|SZRD1_MOUSE Isoform 2 of SUZ domain-containing protein 1	0.968612	14.8983	0.968612	14.8983	5.02243e-11	115.57														1	S	KSKSPPKVPIVIQDDSLPTGPPPQIRILKRP	X;X;X;X;X;X;X;X;X;X;X;X;X;X;X;Phospho (STY);X;X;X;X;X;X;X;X;X;X;X;X;X;X;X	XXXPPPPPPPPPPPPPPPPPPPPPPPXXXXX	5.02243e-11	115.57	115.57	_SPPKVPIVIQDDS(ph)LPTGPPPQIR_	S(0.031)PPKVPIVIQDDS(0.969)LPTGPPPQIR	S(-14.9)PPKVPIVIQDDS(14.9)LPT(-44.73)GPPPQIR	13	3	844.447	-0.17069	0.54391	0.54391	NaN	NaN	0.78936	0.78936	NaN	NaN	NaN
A2AAE1-3;A2AAE1-2;A2AAE1;A2AAE1-6;A2AAE1-4	1323;1323;1323;1323;936	A2AAE1-3	A2AAE1-3	Uncharacterized protein KIAA1109	Kiaa1109	>sp|A2AAE1-3|K1109_MOUSE Isoform 3 of Uncharacterized protein KIAA1109 OS=Mus musculus GN=Kiaa1109;>sp|A2AAE1-2|K1109_MOUSE Isoform 2 of Uncharacterized protein KIAA1109 OS=Mus musculus GN=Kiaa1109;>sp|A2AAE1|K1109_MOUSE Uncharacterized protein KIAA1109 OS	0.999634	34.3691					0.985285	18.2582	0.0084762	72.958					0.999634	34.3691	0.000902755	101.89		1	S	KRQASVCSTRLGSTKSLTAAFYGDKQPVTVG	X;X;X;X;X;X;X;X;X;X;X;X;X;X;X;Phospho (STY);X;X;X;X;X;X;X;X;X;X;X;X;X;X;X	XXXXXXXXXXXXXXXPPPPPPPPPPXXXXXX	0.000902755	101.89	101.89	_S(ph)LTAAFYGDK_	S(1)LTAAFYGDK	S(34.37)LT(-34.37)AAFY(-85.26)GDK	1	2	576.752	-0.18092	0.85797	0.85797	NaN	NaN	0.88707	0.88707	NaN	NaN	NaN
A2AAE1-3;A2AAE1-2;A2AAE1;A2AAE1-6;A2AAE1-4	2755;2755;2755;2755;2368	A2AAE1-3	A2AAE1-3	Uncharacterized protein KIAA1109	Kiaa1109	>sp|A2AAE1-3|K1109_MOUSE Isoform 3 of Uncharacterized protein KIAA1109 OS=Mus musculus GN=Kiaa1109;>sp|A2AAE1-2|K1109_MOUSE Isoform 2 of Uncharacterized protein KIAA1109 OS=Mus musculus GN=Kiaa1109;>sp|A2AAE1|K1109_MOUSE Uncharacterized protein KIAA1109 OS	0.995798	23.7466	0.955662	13.3353	1.79953e-06	132.14	0.995798	23.7466	1.92237e-89	255.19	0.985875	18.4383	2.94418e-19	187.78	0.983465	17.7436	4.31047e-74	244.32		1	S	EPTCRVVFENEQDNNSLTKTQRKRSLVTSEP	X;X;X;X;X;X;X;X;X;X;X;X;X;X;X;Phospho (STY);X;X;X;X;X;X;X;X;X;X;X;X;X;X;X	XXXXXPPPPPPPPPPPPPPXXXXXXXXXXXX	1.92237e-89	255.19	95.954	_VVFENEQDNNS(ph)LTK_	VVFENEQDNNS(0.996)LT(0.004)K	VVFENEQDNNS(23.75)LT(-23.75)K	11	2	858.877	0.37592	0.98846	0.98846	NaN	NaN	1.2033	1.2033	NaN	NaN	NaN
A2AAY5	550	A2AAY5	A2AAY5	SH3 and PX domain-containing protein 2B	Sh3pxd2b	>sp|A2AAY5|SPD2B_MOUSE SH3 and PX domain-containing protein 2B OS=Mus musculus GN=Sh3pxd2b PE=1 SV=1	0.959631	13.7605	0.959631	13.7605	4.7128e-05	105.5	0.894164	9.26785	4.90687e-06	124.16	0.89969	9.52747	4.00233e-05	109.89	0.901573	9.61889	2.35342e-08	135.18		1	S	ELLERERQKMEPLRGSSPKPPGMILPMIPAK	X;X;X;X;X;X;X;X;X;X;X;X;X;X;X;Phospho (STY);X;X;X;X;X;X;Oxidation (M);X;X;X;Oxidation (M);X;X;X;X	XXXXXXXXXXXXXXPPPPPPPPPPPPPPPPP	2.35342e-08	135.18	78.326	_GS(ph)SPKPPGMILPMIPAK_	GS(0.96)S(0.04)PKPPGMILPMIPAK	GS(13.76)S(-13.76)PKPPGMILPMIPAK	2	2	900.961	-0.85429	0.7158	0.7158	NaN	NaN	0.98011	0.98011	NaN	NaN	NaN
A2AAY5	551	A2AAY5	A2AAY5	SH3 and PX domain-containing protein 2B	Sh3pxd2b	>sp|A2AAY5|SPD2B_MOUSE SH3 and PX domain-containing protein 2B OS=Mus musculus GN=Sh3pxd2b PE=1 SV=1	0.914107	10.2704	0.545952	0.800526	4.7128e-05	105.5	0.914107	10.2704	4.88519e-05	102.73	0.895924	9.34922	4.00233e-05	109.89	0.850727	7.80905	2.35342e-08	135.18		1	S	LLERERQKMEPLRGSSPKPPGMILPMIPAKH	X;X;X;X;X;X;X;X;X;X;X;X;X;X;X;Phospho (STY);X;X;X;X;X;Oxidation (M);X;X;X;Oxidation (M);X;X;X;X;X	XXXXXXXXXXXXXPPPPPPPPPPPPPPPPPX	2.35342e-08	135.18	102.73	_GSS(ph)PKPPGMILPMIPAK_	GS(0.086)S(0.914)PKPPGMILPMIPAK	GS(-10.27)S(10.27)PKPPGMILPMIPAK	3	3	600.977	-0.76253	0.46251	0.46251	NaN	NaN	0.5323	0.5323	NaN	NaN	NaN
A2AAY5	290	A2AAY5	A2AAY5	SH3 and PX domain-containing protein 2B	Sh3pxd2b	>sp|A2AAY5|SPD2B_MOUSE SH3 and PX domain-containing protein 2B OS=Mus musculus GN=Sh3pxd2b PE=1 SV=1	0.869786	8.24757	0.497452	0	0.00260715	64.275	0.499999	0	3.71282e-07	119.27	0.587654	1.59781	1.00473e-06	117.48	0.869786	8.24757	2.5999e-27	155.49		1	S	LKKNSGEPLPPKLGPSSPAHSGALDLDGVSR	X;X;X;X;X;X;X;X;X;X;X;X;X;X;X;Phospho (STY);X;X;X;X;X;X;X;X;X;X;X;X;X;X;X	XXXXXXXXXXXXPPPPPPPPPPPPPPPPPPP	2.5999e-27	155.49	155.49	_LGPS(ph)SPAHSGALDLDGVSR_	LGPS(0.87)S(0.13)PAHSGALDLDGVSR	LGPS(8.25)S(-8.25)PAHS(-62.24)GALDLDGVS(-131.18)R	4	2	958.449	0.094146	2.4534	2.4534	NaN	NaN	2.5107	2.5107	NaN	NaN	0.18336
A2AAY5	291	A2AAY5	A2AAY5	SH3 and PX domain-containing protein 2B	Sh3pxd2b	>sp|A2AAY5|SPD2B_MOUSE SH3 and PX domain-containing protein 2B OS=Mus musculus GN=Sh3pxd2b PE=1 SV=1	0.805041	6.55715	0.805041	6.55715	0.0556363	64.87	0.499999	0	3.71282e-07	119.27	0.489658	0	0.00619735	54.223	0.797794	6.01982	2.76407e-07	121.27		1	S	KKNSGEPLPPKLGPSSPAHSGALDLDGVSRH	X;X;X;X;X;X;X;X;X;X;X;X;X;X;X;Phospho (STY);X;X;X;X;X;X;X;X;X;X;X;X;X;X;X	XXXXXXXXXXXPPPPPPPPPPPPPPPPPPPX	2.76407e-07	121.27	56.746	_LGPSS(ph)PAHSGALDLDGVSR_	LGPS(0.178)S(0.805)PAHS(0.017)GALDLDGVSR	LGPS(-6.56)S(6.56)PAHS(-16.73)GALDLDGVS(-52.9)R	5	3	639.302	-1.7934	0.50478	0.50478	NaN	NaN	0.59039	0.59039	NaN	NaN	0.18336
A2AAY5	295	A2AAY5	A2AAY5	SH3 and PX domain-containing protein 2B	Sh3pxd2b	>sp|A2AAY5|SPD2B_MOUSE SH3 and PX domain-containing protein 2B OS=Mus musculus GN=Sh3pxd2b PE=1 SV=1	0.960062	14.766					0.563268	1.90287	0.00142424	69.805					0.960062	14.766	1.0333e-05	114.96		1	S	GEPLPPKLGPSSPAHSGALDLDGVSRHQNAM	X;X;X;X;X;X;X;X;X;X;X;X;X;X;X;Phospho (STY);X;X;X;X;X;X;X;X;X;X;X;X;X;X;X	XXXXXXXPPPPPPPPPPPPPPPPPPPXXXXX	1.0333e-05	114.96	58.712	_LGPSSPAHS(ph)GALDLDGVSR_	LGPS(0.008)S(0.032)PAHS(0.96)GALDLDGVSR	LGPS(-20.86)S(-14.77)PAHS(14.77)GALDLDGVS(-45.67)R	9	3	639.302	-0.22317	2.3121	2.3121	NaN	NaN	2.2919	2.2919	NaN	NaN	0.18336
Q99PQ2-2;Q99PQ2;A2AB83	85;85;85	Q99PQ2-2	Q99PQ2-2	E3 ubiquitin-protein ligase TRIM11	Trim11;Trim11	>sp|Q99PQ2-2|TRI11_MOUSE Isoform 2 of E3 ubiquitin-protein ligase TRIM11 OS=Mus musculus GN=Trim11;>sp|Q99PQ2|TRI11_MOUSE E3 ubiquitin-protein ligase TRIM11 OS=Mus musculus GN=Trim11 PE=1 SV=1;>tr|A2AB83|A2AB83_MOUSE E3 ubiquitin-protein ligase TRIM11 OS=M	1	65.2186	1	70.7831	0.000959627	80.638	1	64.7982	0.000171981	102.52	1	55.7239	0.000391201	90.759	1	65.2186	0.000504216	88.092		1	S	PLAKMAEMARRLHPPSPVPQGVCAAHREPLT	X;X;X;X;X;X;X;X;X;X;X;X;X;X;X;Phospho (STY);X;X;X;X;X;X;X;X;X;X;X;X;X;X;X	XXXXXXXXXXXPPPPPPPPPPPPPPPPXXXX	0.000171534	102.52	65.219	_LHPPS(ph)PVPQGVCAAHR_	LHPPS(1)PVPQGVCAAHR	LHPPS(65.22)PVPQGVCAAHR	5	3	601.622	-0.34915	0.61174	0.61174	NaN	NaN	0.77915	0.77915	NaN	NaN	NaN
A2ABV5;A2BDP0	1117;478	A2ABV5	A2ABV5	Mediator of RNA polymerase II transcription subunit 14	Med14;Med14	>sp|A2ABV5|MED14_MOUSE Mediator of RNA polymerase II transcription subunit 14 OS=Mus musculus GN=Med14 PE=1 SV=1;>tr|A2BDP0|A2BDP0_MOUSE Mediator complex subunit 14 OS=Mus musculus GN=Med14 PE=4 SV=1	1	72.6076	0.960939	14.2836	0.00814403	53.964	1	72.6076	5.00932e-25	159.67	0.999984	47.953	6.28881e-25	158.33	0.999999	60.3583	2.00494e-25	162.81		1	S	YTMVSPSGRAGNWPGSPQVSGPSPATRLPGM	X;X;X;X;X;X;X;X;X;X;X;X;X;X;X;Phospho (STY);X;X;X;X;X;X;X;X;X;X;X;X;X;X;X	XXXXXXXXXPPPPPPPPPPPPPPPPPPXXXX	2.00494e-25	162.81	159.67	_AGNWPGS(ph)PQVSGPSPATR_	AGNWPGS(1)PQVSGPSPATR	AGNWPGS(72.61)PQVS(-72.61)GPS(-89.22)PAT(-100.51)R	7	2	923.418	0.00076768	0.94374	0.94374	NaN	NaN	1.0195	1.0195	NaN	NaN	NaN
A2ABV5;A2BDP0	1149;510	A2ABV5	A2ABV5	Mediator of RNA polymerase II transcription subunit 14	Med14;Med14	>sp|A2ABV5|MED14_MOUSE Mediator of RNA polymerase II transcription subunit 14 OS=Mus musculus GN=Med14 PE=1 SV=1;>tr|A2BDP0|A2BDP0_MOUSE Mediator complex subunit 14 OS=Mus musculus GN=Med14 PE=4 SV=1	0.554059	0.959596					0.554059	0.959596	0.00024227	60.621										1	S	PANPSLHSPVPDVSHSPRAGTSSQTMPTNMP	X;X;X;X;X;X;X;X;X;X;X;X;X;X;X;Phospho (STY);X;X;X;X;X;X;X;X;X;X;X;X;X;X;X	PPPPPPPPPPPPPPPPPPXXXXXXXXXXXXX	0.00024227	60.621	60.621	_LPGMSPANPSLHSPVPDVSHS(ph)PR_	LPGMSPANPSLHS(0.002)PVPDVS(0.444)HS(0.554)PR	LPGMS(-44.68)PANPS(-39.25)LHS(-25.29)PVPDVS(-0.96)HS(0.96)PR	21	3	820.389	0.22275	0.87385	0.87385	NaN	NaN	1.059	1.059	NaN	NaN	NaN
O54864-2;A2AC19;O54864	432;392;391	O54864-2	O54864-2	Histone-lysine N-methyltransferase SUV39H1	Suv39h1;Suv39h1	>sp|O54864-2|SUV91_MOUSE Isoform 2 of Histone-lysine N-methyltransferase SUV39H1 OS=Mus musculus GN=Suv39h1;>tr|A2AC19|A2AC19_MOUSE Histone-lysine N-methyltransferase SUV39H1 OS=Mus musculus GN=Suv39h1 PE=3 SV=1;>sp|O54864|SUV91_MOUSE Histone-lysine N-meth	1	101.17	1	77.4159	3.28557e-21	165.17	1	83.1369	0.000210934	112.55	1	92.6074	1.08287e-09	138.75	1	101.17	1.56407e-15	154.49		1	S	STRMDSNFGLAGLPGSPKKRVRIECKCGTTA	X;X;X;Oxidation (M);X;X;X;X;X;X;X;X;X;X;X;Phospho (STY);X;X;X;X;X;X;X;X;X;X;X;X;X;X;X	XXXPPPPPPPPPPPPPPPXXXXXXXXXXXXX	3.28557e-21	165.17	117.4	_M(ox)DSNFGLAGLPGS(ph)PK_	MDSNFGLAGLPGS(1)PK	MDS(-101.17)NFGLAGLPGS(101.17)PK	13	2	793.85	0.52927	0.85503	0.85503	NaN	NaN	0.97086	0.97086	NaN	NaN	NaN
A2ACM0;Q8K4Q0;F7CN67	859;859;154	A2ACM0	A2ACM0	Regulatory-associated protein of mTOR	Rptor;Rptor;Rptor	>tr|A2ACM0|A2ACM0_MOUSE Novel protein containing six WD40 domains at C-terminus OS=Mus musculus GN=Rptor PE=4 SV=1;>sp|Q8K4Q0|RPTOR_MOUSE Regulatory-associated protein of mTOR OS=Mus musculus GN=Rptor PE=1 SV=1;>tr|F7CN67|F7CN67_MOUSE Regulatory-associated	0.996773	25.0695	0.995626	23.5792	6.97111e-43	175.42	0.992773	21.741	2.97506e-24	162.82	0.996773	25.0695	5.7932e-74	221.04	0.991655	22.0929	1.29762e-66	211.98		2	S	NARPQRILDTSSLTQSAPASPTNKGMHMHQV	X;X;X;X;X;X;X;X;X;X;X;X;X;X;X;Phospho (STY);X;X;X;Phospho (STY);X;Phospho (STY);X;X;X;X;X;X;X;X;X	XXXXXXPPPPPPPPPPPPPPPPPPXXXXXXX	5.7932e-74	221.04	221.04	_ILDTSSLTQS(ph)APAS(ph)PTNK_	ILDTSSLT(0.003)QS(0.997)APAS(0.997)PT(0.003)NK	ILDT(-62.39)S(-55.57)S(-39.23)LT(-25.07)QS(25.07)APAS(25.07)PT(-25.07)NK	10	2	995.942	0.43295	0.72444	NaN	0.72444	NaN	0.69405	NaN	0.69405	NaN	NaN
A2ACM0;Q8K4Q0;F7CN67	863;863;158	A2ACM0	A2ACM0	Regulatory-associated protein of mTOR	Rptor;Rptor;Rptor	>tr|A2ACM0|A2ACM0_MOUSE Novel protein containing six WD40 domains at C-terminus OS=Mus musculus GN=Rptor PE=4 SV=1;>sp|Q8K4Q0|RPTOR_MOUSE Regulatory-associated protein of mTOR OS=Mus musculus GN=Rptor PE=1 SV=1;>tr|F7CN67|F7CN67_MOUSE Regulatory-associated	0.999999	62.1487	0.99993	41.5582	2.1589e-157	275.02	0.99997	45.169	3.12509e-199	294.37	0.999997	55.1502	7.16698e-223	304.66	0.999999	62.1487	0	368.21		1;2	S	QRILDTSSLTQSAPASPTNKGMHMHQVGGSP	X;X;X;X;X;X;X;X;X;Phospho (STY);X;Phospho (STY);X;X;X;Phospho (STY);X;X;X;X;X;X;X;X;X;X;X;X;X;X;X	XXPPPPPPPPPPPPPPPPPPXXXXXXXXXXX	0	368.21	368.21	_ILDTSSLTQSAPAS(ph)PTNK_	ILDTSSLTQSAPAS(1)PTNK	ILDT(-211.69)S(-197.08)S(-182.15)LT(-85.59)QS(-81.24)APAS(62.15)PT(-62.15)NK	14	2	955.959	0.36943	0.87702	0.87702	0.69279	NaN	0.94116	0.94116	0.67198	NaN	NaN
A2ACV6;E1U8D0	1536;1300	A2ACV6	A2ACV6		9830001H06Rik;Soga	>tr|A2ACV6|A2ACV6_MOUSE Novel protein OS=Mus musculus GN=9830001H06Rik PE=4 SV=1;>sp|E1U8D0|SOGA1_MOUSE Protein SOGA1 OS=Mus musculus GN=Soga1 PE=1 SV=3	0.99682	25.2544	0.99682	25.2544	0.00207208	75.376	0.996751	27.8788	0.00127031	79.639	0.950762	13.8983	0.0530798	44.005	0.934988	12.1142	0.0583314	42.708		1	S	GIVQEFFRNVCGRAPSPTTAAGEESCKKPEP	X;X;X;X;X;X;X;X;X;X;X;X;X;X;X;Phospho (STY);X;X;X;X;X;X;X;X;X;X;X;X;X;X;X	XXXXXXXXXXXXXPPPPPPPPPPPPPPXXXX	0.00127031	79.639	73.877	_APS(ph)PTTAAGEESCK_	APS(0.997)PT(0.003)TAAGEESCK	APS(25.25)PT(-25.25)T(-36.84)AAGEES(-60.54)CK	3	2	743.3	0.08762	0.74862	0.74862	NaN	NaN	0.96432	0.96432	NaN	NaN	NaN
A2AEG2;Q80Z25	666;664	A2AEG2	A2AEG2	Oral-facial-digital syndrome 1 protein homolog	Ofd1;Ofd1	>tr|A2AEG2|A2AEG2_MOUSE Oral-facial-digital syndrome 1 gene homolog (Human) OS=Mus musculus GN=Ofd1 PE=4 SV=1;>sp|Q80Z25|OFD1_MOUSE Oral-facial-digital syndrome 1 protein homolog OS=Mus musculus GN=Ofd1 PE=1 SV=1	0.993048	22.4332	0.968228	15.7823	2.10952e-09	153.79	0.771906	6.70972	3.3323e-06	130.47	0.993048	22.4332	3.53557e-09	142.45	0.836796	7.47266	0.0156519	71.08		1	S	AFRTYYQRATQNPSTSPQPAKSPPSVNSVAA	X;X;X;X;X;X;X;X;X;X;X;X;X;X;X;Phospho (STY);X;X;X;X;X;X;X;X;X;X;X;X;X;X;X	XXXXXXXXPPPPPPPPPPPPPXXXXXXXXXX	2.10952e-09	153.79	127.57	_ATQNPSTS(ph)PQPAK_	ATQNPS(0.001)T(0.006)S(0.993)PQPAK	AT(-96.61)QNPS(-28.89)T(-22.43)S(22.43)PQPAK	8	2	703.819	-0.21666	0.80541	0.80541	NaN	NaN	0.88649	0.88649	NaN	NaN	NaN
A2AES4;A2AES5;Q3U2S4;Q3U2S4-2;A2AES3	64;64;64;64;64	A2AES4	A2AES4	OTU domain-containing protein 5	Otud5;Otud5;Otud5;Otud5	>tr|A2AES4|A2AES4_MOUSE OTU domain containing 5 OS=Mus musculus GN=Otud5 PE=4 SV=1;>tr|A2AES5|A2AES5_MOUSE OTU domain containing 5 OS=Mus musculus GN=Otud5 PE=4 SV=1;>sp|Q3U2S4|OTUD5_MOUSE OTU domain-containing protein 5 OS=Mus musculus GN=Otud5 PE=1 SV=2;	1	93.1523	1	42.3222	4.36266e-05	103.17	1	37.8496	1.91054e-05	111.38	1	103.581	3.58001e-05	103.58	1	93.1523	9.37737e-05	95.414		1	S	ERDRDSGVVGARPRASPPPQGPLPGPPGALH	X;X;X;X;X;X;X;X;X;X;X;X;X;X;X;Phospho (STY);X;X;X;X;X;X;X;X;X;X;X;X;X;X;X	XXXXXXXXXXXXPPPPPPPPPPPPPPPPPPP	1.91054e-05	111.38	93.152	_PRAS(ph)PPPQGPLPGPPGALHR_	PRAS(1)PPPQGPLPGPPGALHR	PRAS(93.15)PPPQGPLPGPPGALHR	4	3	693.693	-0.24882	0.74056	0.74056	NaN	NaN	0.83794	0.83794	NaN	NaN	NaN
A2AES4;A2AES5;Q3U2S4;Q3U2S4-2;A2AES3	508;503;503;460;454	A2AES4	A2AES4	OTU domain-containing protein 5	Otud5;Otud5;Otud5;Otud5	>tr|A2AES4|A2AES4_MOUSE OTU domain containing 5 OS=Mus musculus GN=Otud5 PE=4 SV=1;>tr|A2AES5|A2AES5_MOUSE OTU domain containing 5 OS=Mus musculus GN=Otud5 PE=4 SV=1;>sp|Q3U2S4|OTUD5_MOUSE OTU domain-containing protein 5 OS=Mus musculus GN=Otud5 PE=1 SV=2;	0.826287	6.7803	0.792612	8.33077	0.0364292	47.568	0.826287	6.7803	0.00623985	99.044	0.769609	5.58841	0.00771903	110.04	0.49982	0	0.011687	73.279		1	S	PGTSSQFSAGGDRATSPLVSLYPALECRALI	X;X;X;X;X;X;X;X;X;X;X;X;X;X;X;Phospho (STY);X;X;X;X;X;X;X;X;X;X;X;X;X;X;X	XXXXXXXXXXXXXPPPPPPPPPPPPPPPXXX	0.00105381	110.04	99.044	_ATS(ph)PLVSLYPALECR_	AT(0.173)S(0.826)PLVSLYPALECR	AT(-6.78)S(6.78)PLVS(-34.59)LY(-52.01)PALECR	3	2	878.921	-0.33783	0.53229	0.53229	NaN	NaN	0.64349	0.64349	NaN	NaN	NaN
A2AES4;A2AES5;Q3U2S4	165;165;165	A2AES4	A2AES4	OTU domain-containing protein 5	Otud5;Otud5;Otud5	>tr|A2AES4|A2AES4_MOUSE OTU domain containing 5 OS=Mus musculus GN=Otud5 PE=4 SV=1;>tr|A2AES5|A2AES5_MOUSE OTU domain containing 5 OS=Mus musculus GN=Otud5 PE=4 SV=1;>sp|Q3U2S4|OTUD5_MOUSE OTU domain-containing protein 5 OS=Mus musculus GN=Otud5 PE=1 SV=2	1	59.512	1	56.1208	0.0150353	56.121	1	59.512	0.0101482	59.512	1	120.56	4.20642e-21	159.95	1	50.1551	0.0266432	50.155		1	S	KRRRQAPGVGAVGGASPEREEVGAGYNSEDE	X;X;X;X;X;X;X;X;X;X;X;X;X;X;X;Phospho (STY);X;X;X;X;X;X;X;X;X;X;X;X;X;X;X	XXXXPPPPPPPPPPPPPPPXXXXXXXXXXXX	4.20642e-21	159.95	59.512	_QAPGVGAVGGAS(ph)PER_	QAPGVGAVGGAS(1)PER	QAPGVGAVGGAS(59.51)PER	12	2	716.833	-1.0384	0.94488	0.94488	NaN	NaN	1.1021	1.1021	NaN	NaN	NaN
A2AEW1;Q64092;A2AEW0;Q64092-4;Q64092-2;Q64092-3	550;550;515;515;445;410	A2AEW1	A2AEW1	Transcription factor E3	Tfe3;Tfe3;Tfe3	>tr|A2AEW1|A2AEW1_MOUSE Transcription factor E3 OS=Mus musculus GN=Tfe3 PE=4 SV=1;>sp|Q64092|TFE3_MOUSE Transcription factor E3 OS=Mus musculus GN=Tfe3 PE=1 SV=2;>tr|A2AEW0|A2AEW0_MOUSE Transcription factor E3 OS=Mus musculus GN=Tfe3 PE=4 SV=1;>sp|Q64092-4	0.563617	1.48542					0.563617	1.48542	0.000893361	81.723										1	S	GGALSPLRAASDPLLSSVSPAVSKASSRRSS	X;X;X;X;X;X;X;X;X;X;X;X;X;X;X;Phospho (STY);X;X;X;X;X;X;X;X;X;X;X;X;X;Phospho (STY);Phospho (STY)	XXXXXXXXPPPPPPPPPPPPPPPPXXXXXXX	0.000893361	81.723	81.723	_AASDPLLS(ph)SVSPAVSK_	AASDPLLS(0.564)S(0.4)VS(0.036)PAVSK	AAS(-36.11)DPLLS(1.49)S(-1.49)VS(-11.96)PAVS(-61.26)K	8	2	804.898	-0.33449	0.90663	0.90663	NaN	NaN	1.0055	1.0055	NaN	NaN	NaN
A2AEW1;Q64092;A2AEW0;Q64092-4;Q64092-2;Q64092-3	551;551;516;516;446;411	A2AEW1	A2AEW1	Transcription factor E3	Tfe3;Tfe3;Tfe3	>tr|A2AEW1|A2AEW1_MOUSE Transcription factor E3 OS=Mus musculus GN=Tfe3 PE=4 SV=1;>sp|Q64092|TFE3_MOUSE Transcription factor E3 OS=Mus musculus GN=Tfe3 PE=1 SV=2;>tr|A2AEW0|A2AEW0_MOUSE Transcription factor E3 OS=Mus musculus GN=Tfe3 PE=4 SV=1;>sp|Q64092-4	0.582962	1.49533	0.582962	1.49533	0.000587654	86.727														1	S	GALSPLRAASDPLLSSVSPAVSKASSRRSSF	X;X;X;X;X;X;X;X;X;X;X;X;X;X;X;Phospho (STY);X;X;X;X;X;X;X;X;X;X;X;X;Phospho (STY);Phospho (STY);X	XXXXXXXPPPPPPPPPPPPPPPPXXXXXXXX	0.000587654	86.727	86.727	_AASDPLLSS(ph)VSPAVSK_	AASDPLLS(0.004)S(0.583)VS(0.413)PAVSK	AAS(-59.4)DPLLS(-21.9)S(1.5)VS(-1.5)PAVS(-36.86)K	9	2	804.898	-0.3369	0.91132	0.91132	NaN	NaN	1.1524	1.1524	NaN	NaN	NaN
A2AEW1;Q64092;A2AEW0;Q64092-4;Q64092-2;Q64092-3	553;553;518;518;448;413	A2AEW1	A2AEW1	Transcription factor E3	Tfe3;Tfe3;Tfe3	>tr|A2AEW1|A2AEW1_MOUSE Transcription factor E3 OS=Mus musculus GN=Tfe3 PE=4 SV=1;>sp|Q64092|TFE3_MOUSE Transcription factor E3 OS=Mus musculus GN=Tfe3 PE=1 SV=2;>tr|A2AEW0|A2AEW0_MOUSE Transcription factor E3 OS=Mus musculus GN=Tfe3 PE=4 SV=1;>sp|Q64092-4	0.99999	49.9794	0.999978	47.6941	4.36884e-63	228.08	0.99999	49.9794	8.65917e-45	202.96	0.999967	44.8623	7.03331e-46	211.43	0.999902	40.1165	1.04455e-54	221.51		1;2	S	LSPLRAASDPLLSSVSPAVSKASSRRSSFSM	X;X;X;X;X;X;X;X;X;X;X;X;X;X;X;Phospho (STY);X;X;X;Phospho (STY);X;X;X;X;X;X;Phospho (STY);Phospho (STY);X;X;Oxidation (M)	XXXXXPPPPPPPPPPPPPPPPXXXXXXXXXX	4.36884e-63	228.08	201.61	_AASDPLLSSVS(ph)PAVSK_	AASDPLLSSVS(1)PAVSK	AAS(-154.38)DPLLS(-77.36)S(-49.98)VS(49.98)PAVS(-75.35)K	11	2	804.898	0.40215	0.81466	0.81466	0.69886	NaN	1.0611	1.0611	0.61977	NaN	NaN
A2AEW1;Q64092;A2AEW0;Q64092-4;Q64092-2;Q64092-3	557;557;522;522;452;417	A2AEW1	A2AEW1	Transcription factor E3	Tfe3;Tfe3;Tfe3	>tr|A2AEW1|A2AEW1_MOUSE Transcription factor E3 OS=Mus musculus GN=Tfe3 PE=4 SV=1;>sp|Q64092|TFE3_MOUSE Transcription factor E3 OS=Mus musculus GN=Tfe3 PE=1 SV=2;>tr|A2AEW0|A2AEW0_MOUSE Transcription factor E3 OS=Mus musculus GN=Tfe3 PE=4 SV=1;>sp|Q64092-4	1	70.7389													1	70.7389	2.85523e-06	132.01		2	S	RAASDPLLSSVSPAVSKASSRRSSFSMEEES	X;X;X;X;X;X;X;X;X;X;X;Phospho (STY);X;X;X;Phospho (STY);X;X;X;X;X;X;Phospho (STY);Phospho (STY);X;X;Oxidation (M);X;X;X;X	XPPPPPPPPPPPPPPPPXXXXXXXXXXXXXX	2.85523e-06	132.01	132.01	_AASDPLLSSVS(ph)PAVS(ph)K_	AASDPLLS(0.013)S(0.064)VS(0.924)PAVS(1)K	AAS(-55.28)DPLLS(-18.66)S(-11.6)VS(11.6)PAVS(70.74)K	15	2	844.881	0.020219	0.69886	NaN	0.69886	NaN	0.61977	NaN	0.61977	NaN	NaN
A2AEW1;Q64092;A2AEW0;Q64092-4;Q64092-2;Q64092-3	565;565;530;530;460;425	A2AEW1	A2AEW1	Transcription factor E3	Tfe3;Tfe3;Tfe3	>tr|A2AEW1|A2AEW1_MOUSE Transcription factor E3 OS=Mus musculus GN=Tfe3 PE=4 SV=1;>sp|Q64092|TFE3_MOUSE Transcription factor E3 OS=Mus musculus GN=Tfe3 PE=1 SV=2;>tr|A2AEW0|A2AEW0_MOUSE Transcription factor E3 OS=Mus musculus GN=Tfe3 PE=4 SV=1;>sp|Q64092-4	0.999162	30.9279	0.984575	18.7355	5.67961e-05	141.13					0.460231	0	0.0296925	52.49	0.999162	30.9279	3.30969e-05	151.55		1	S	SSVSPAVSKASSRRSSFSMEEES________	Phospho (STY);Phospho (STY);X;Phospho (STY);X;X;X;Phospho (STY);X;X;X;X;X;X;X;Phospho (STY);X;X;Oxidation (M);X;X;X;X;X;X;X;X;X;X;X;X	XXXXXXXXXXXXXPPPPPPPPPPXXXXXXXX	3.30969e-05	151.55	138.89	_RSS(ph)FSM(ox)EEES_	RSS(0.999)FS(0.001)MEEES	RS(-45.13)S(30.93)FS(-30.93)MEEES(-106.74)	3	2	642.726	-0.018676	1.0041	1.0041	NaN	NaN	0.98226	0.98226	NaN	NaN	NaN
A2AF47;A2AF67	1208;1037	A2AF47;A2AF67	A2AF47	Dedicator of cytokinesis protein 11	Dock11;Dock11	>sp|A2AF47|DOC11_MOUSE Dedicator of cytokinesis protein 11 OS=Mus musculus GN=Dock11 PE=1 SV=1;>tr|A2AF67|A2AF67_MOUSE Dedicator of cytokinesis 11 OS=Mus musculus GN=Dock11 PE=4 SV=1	0.997015	25.2376	0.997015	25.2376	4.27968e-06	128.74					0.996917	25.097	4.13299e-06	129.01						1	S	MPSSASRDEFPCGFVSPTNRGSLASDKDTAY	X;X;X;X;X;X;X;X;X;X;X;X;X;X;X;Phospho (STY);X;X;X;X;X;X;X;X;X;X;X;X;X;X;X	XXXXXXXPPPPPPPPPPPPPXXXXXXXXXXX	4.13299e-06	129.01	128.74	_DEFPCGFVS(ph)PTNR_	DEFPCGFVS(0.997)PT(0.003)NR	DEFPCGFVS(25.24)PT(-25.24)NR	9	2	803.324	0.18569	2.1403	2.1403	NaN	NaN	2.2373	2.2373	NaN	NaN	NaN
A2AF47	12	A2AF47	A2AF47	Dedicator of cytokinesis protein 11	Dock11	>sp|A2AF47|DOC11_MOUSE Dedicator of cytokinesis protein 11 OS=Mus musculus GN=Dock11 PE=1 SV=1	0.998991	29.9559	0.998991	29.9559	0.0026392	73.386	0.995622	23.5684	0.00564327	65.219	0.995838	23.7887	0.0190248	52.071						1	S	____MAEVRKFTKRLSKPGTAAELRQSVSEA	X;X;X;X;X;X;X;X;X;X;X;X;X;X;X;Phospho (STY);X;X;X;X;X;X;X;X;X;X;X;X;X;X;X	XXXXXXXXXXXXXPPPPPPPPPPPPXXXXXX	0.0026392	73.386	67.136	_RLS(ph)KPGTAAELR_	RLS(0.999)KPGT(0.001)AAELR	RLS(29.96)KPGT(-29.96)AAELR	3	3	460.245	0.039102	0.30051	0.30051	NaN	NaN	0.42715	0.42715	NaN	NaN	NaN
A2AFJ8;Q9ES28;Q9ES28-7;Q9ES28-2;Q9ES28-3;Q9ES28-4;Q9ES28-8;D3Z0V2;Q9ES28-5;Q9ES28-6;F6WMJ3;Q8K4I3	360;682;630;682;607;630;525;450;682;630;672;648	A2AFJ8;Q9ES28;Q8K4I3	Q9ES28	Rho guanine nucleotide exchange factor 7;Rho guanine nucleotide exchange factor 6	Arhgef6;Arhgef7;Arhgef7;Arhgef6;Arhgef6	>tr|A2AFJ8|A2AFJ8_MOUSE Rac/Cdc42 guanine nucleotide exchange factor (GEF) 6 OS=Mus musculus GN=Arhgef6 PE=4 SV=1;>sp|Q9ES28|ARHG7_MOUSE Rho guanine nucleotide exchange factor 7 OS=Mus musculus GN=Arhgef7 PE=1 SV=2;>sp|Q9ES28-7|ARHG7_MOUSE Isoform G of Rho	0.999727	35.6315	0.991673	20.7586	1.82363e-34	218.12	0.980636	17.0452	2.81787e-56	235.88	0.991723	20.7853	3.4793e-05	124.78	0.999727	35.6315	3.63788e-151	289.61		1	S	KPERKPSDEEFAVRKSTAALEEDAQILKVIE;KTERKASEEEYVIRKSTAALEEDAQILKVIE	X;X;X;X;X;X;Phospho (STY);X;X;X;X;X;X;X;X;Phospho (STY);X;X;X;X;X;X;X;X;X;X;X;X;X;X;X	XXXXXXXXXXXXXXPPPPPPPPPPPPPPXXX	3.63788e-151	289.61	142.3	_KS(ph)TAALEEDAQILK_	KS(1)TAALEEDAQILK	KS(35.63)T(-35.63)AALEEDAQILK	2	2	798.898	0.50928	0.90876	0.90876	NaN	NaN	0.85465	0.85465	NaN	NaN	0.60078
A2AFQ0;Q7TMY8;Q7TMY8-3;Q7TMY8-4;Q7TMY8-2;F6XP90	1395;1395;1395;1395;1395;899	A2AFQ0	A2AFQ0	E3 ubiquitin-protein ligase HUWE1	Huwe1;Huwe1;Huwe1	>tr|A2AFQ0|A2AFQ0_MOUSE E3 ubiquitin-protein ligase HUWE1 OS=Mus musculus GN=Huwe1 PE=4 SV=1;>sp|Q7TMY8|HUWE1_MOUSE E3 ubiquitin-protein ligase HUWE1 OS=Mus musculus GN=Huwe1 PE=1 SV=5;>sp|Q7TMY8-3|HUWE1_MOUSE Isoform 3 of E3 ubiquitin-protein ligase HUWE1	1	48.0443	1	51.0919	0.0403517	51.092	1	42.7176	0.00117021	98.105					1	48.0443	0.0317014	54.7		1	S	AMSLGQDIPMDQRAESPEEVACRKEEEERKA	X;X;X;X;X;X;X;X;X;X;X;X;X;X;X;Phospho (STY);X;X;X;X;X;X;X;X;X;X;X;X;X;X;X	XXXXXXXXXXXXXPPPPPPPPPPXXXXXXXX	0.00117021	98.105	48.044	_AES(ph)PEEVACR_	AES(1)PEEVACR	AES(48.04)PEEVACR	3	2	614.239	-0.51004	1.1627	1.1627	NaN	NaN	1.3426	1.3426	NaN	NaN	0.50932
A2AFQ0;Q7TMY8;Q7TMY8-3;Q7TMY8-4;Q7TMY8-2	2363;2362;2362;2362;2362	A2AFQ0	A2AFQ0	E3 ubiquitin-protein ligase HUWE1	Huwe1;Huwe1	>tr|A2AFQ0|A2AFQ0_MOUSE E3 ubiquitin-protein ligase HUWE1 OS=Mus musculus GN=Huwe1 PE=4 SV=1;>sp|Q7TMY8|HUWE1_MOUSE E3 ubiquitin-protein ligase HUWE1 OS=Mus musculus GN=Huwe1 PE=1 SV=5;>sp|Q7TMY8-3|HUWE1_MOUSE Isoform 3 of E3 ubiquitin-protein ligase HUWE1	1	68.187	1	68.187	4.30254e-10	172.91					0.99829	28.5733	0.000100615	119.65	1	65.8412	4.68634e-08	161.08		1	S	ELEDLIDELLERDGGSGNSTIIVSRSGEDES	X;X;X;X;X;X;X;X;X;X;X;X;X;X;X;Phospho (STY);X;X;X;X;X;X;X;X;X;X;X;X;X;X;X	XXXXXXXXXXXXPPPPPPPPPPPPPXXXXXX	4.30254e-10	172.91	169.94	_DGGS(ph)GNSTIIVSR_	DGGS(1)GNSTIIVSR	DGGS(68.19)GNS(-68.19)T(-74.09)IIVS(-161.19)R	4	2	671.804	0.4241	0.78511	0.78511	NaN	NaN	0.91525	0.91525	NaN	NaN	0.68202
A2AFQ0;Q7TMY8;Q7TMY8-3;Q7TMY8-4;Q7TMY8-2	1907;1907;1907;1907;1907	A2AFQ0	A2AFQ0	E3 ubiquitin-protein ligase HUWE1	Huwe1;Huwe1	>tr|A2AFQ0|A2AFQ0_MOUSE E3 ubiquitin-protein ligase HUWE1 OS=Mus musculus GN=Huwe1 PE=4 SV=1;>sp|Q7TMY8|HUWE1_MOUSE E3 ubiquitin-protein ligase HUWE1 OS=Mus musculus GN=Huwe1 PE=1 SV=5;>sp|Q7TMY8-3|HUWE1_MOUSE Isoform 3 of E3 ubiquitin-protein ligase HUWE1	0.999993	54.6327	0.998966	31.4502	4.08765e-24	197.75	0.999993	54.6327	4.17721e-31	210.39	0.996526	24.6403	4.28434e-19	185.28	0.999087	31.2396	1.07607e-38	212.95		1	S	CIRIALPAPRGSGTASDDEFENLRIKGPNAV	X;X;X;X;X;X;X;X;X;X;X;X;X;X;X;Phospho (STY);X;X;X;X;X;X;X;X;X;X;X;X;X;X;X	XXXXXXXXXXPPPPPPPPPPPPPPXXXXXXX	1.07607e-38	212.95	197.17	_GSGTAS(ph)DDEFENLR_	GSGTAS(1)DDEFENLR	GS(-54.63)GT(-54.63)AS(54.63)DDEFENLR	6	2	789.309	-0.086957	1.8484	1.8484	NaN	NaN	2.3412	2.3412	NaN	NaN	0.72896
A2AFQ0;Q7TMY8;Q7TMY8-3;Q7TMY8-4	3759;3758;3758;3758	A2AFQ0	A2AFQ0	E3 ubiquitin-protein ligase HUWE1	Huwe1;Huwe1	>tr|A2AFQ0|A2AFQ0_MOUSE E3 ubiquitin-protein ligase HUWE1 OS=Mus musculus GN=Huwe1 PE=4 SV=1;>sp|Q7TMY8|HUWE1_MOUSE E3 ubiquitin-protein ligase HUWE1 OS=Mus musculus GN=Huwe1 PE=1 SV=5;>sp|Q7TMY8-3|HUWE1_MOUSE Isoform 3 of E3 ubiquitin-protein ligase HUWE1	0.955986	16.8832					0.608058	6.45719	0.0281347	45.844	0.853109	11.3753	0.00186467	70.538	0.955986	16.8832	0.00113714	75.797		1	S	KKAKQTGRLGSSGLGSASSIQAAVRQLEAEA	X;X;X;X;X;X;X;X;X;X;X;X;X;X;X;Phospho (STY);X;X;X;X;X;X;X;X;X;X;X;X;X;X;X	XXXXXXXXPPPPPPPPPPPPPPPPPXXXXXX	0.00113714	75.797	75.797	_LGSSGLGS(ph)ASSIQAAVR_	LGS(0.005)S(0.02)GLGS(0.956)AS(0.008)S(0.011)IQAAVR	LGS(-22.46)S(-16.88)GLGS(16.88)AS(-20.57)S(-19.55)IQAAVR	8	2	820.904	-0.16087	0.36269	0.36269	NaN	NaN	0.35635	0.35635	NaN	NaN	0.6971
Q8BX17;A2AFQ9	1414;1413	Q8BX17	Q8BX17	Gem-associated protein 5	Gemin5;Gemin5	>sp|Q8BX17|GEMI5_MOUSE Gem-associated protein 5 OS=Mus musculus GN=Gemin5 PE=1 SV=2;>tr|A2AFQ9|A2AFQ9_MOUSE Gem (Nuclear organelle) associated protein 5 OS=Mus musculus GN=Gemin5 PE=4 SV=1	0.942895	12.1779	0.828568	6.8424	0.0159642	81.632					0.942895	12.1779	4.22338e-06	134.81	0.5	0	0.0196209	79.652		1	S	DEPSQEAERAPSQPPSPTEERNAPVSLPELT	X;X;X;X;X;X;X;X;X;X;X;X;X;X;X;Phospho (STY);X;X;X;X;X;X;X;X;X;Phospho (STY);X;X;X;X;X	XXXXXXXXXPPPPPPPPPPPPXXXXXXXXXX	4.22338e-06	134.81	134.81	_APSQPPS(ph)PTEER_	APSQPPS(0.943)PT(0.057)EER	APS(-87.92)QPPS(12.18)PT(-12.18)EER	7	2	688.298	0.82775	1.5565	1.5565	NaN	NaN	1.7731	1.7731	NaN	NaN	0.88958
A2AG58;A2AG58-2	307;307	A2AG58	A2AG58	Uncharacterized protein CXorf23 homolog		>sp|A2AG58|CX023_MOUSE Uncharacterized protein CXorf23 homolog OS=Mus musculus PE=2 SV=1;>sp|A2AG58-2|CX023_MOUSE Isoform 2 of Uncharacterized protein CXorf23 homolog OS=Mus musculus	0.987914	19.1243									0.987914	19.1243	0.00519284	97.45						1	S	TTRVSYDYRHKHHKLSESEQDFPDGRFHKHL	X;X;X;X;X;X;X;X;X;X;X;X;X;X;X;Phospho (STY);X;X;X;X;X;X;X;X;X;X;X;X;X;X;X	XXXXXXXXXXXPPPPPPPPPPPPPPPXXXXX	0.00118256	97.45	97.45	_LS(ph)ESEQDFPDGR_	LS(0.988)ES(0.012)EQDFPDGR	LS(19.12)ES(-19.12)EQDFPDGR	2	2	730.29	0.20601	0.19492	0.19492	NaN	NaN	0.18711	0.18711	NaN	NaN	NaN
A2AG58;A2AG58-2	592;592	A2AG58	A2AG58	Uncharacterized protein CXorf23 homolog		>sp|A2AG58|CX023_MOUSE Uncharacterized protein CXorf23 homolog OS=Mus musculus PE=2 SV=1;>sp|A2AG58-2|CX023_MOUSE Isoform 2 of Uncharacterized protein CXorf23 homolog OS=Mus musculus	0.575076	1.31414					0.575076	1.31414	0.00241101	68.919										1	S	KERLQNEDENIFHMASPTERNHQSPSFSKVK	X;X;X;X;X;X;X;X;X;X;X;X;X;X;X;Phospho (STY);X;X;X;X;X;X;X;X;X;X;X;X;X;X;X	XXXPPPPPPPPPPPPPPPPPXXXXXXXXXXX	0.00241101	68.919	68.919	_LQNEDENIFHMAS(ph)PTER_	LQNEDENIFHMAS(0.575)PT(0.425)ER	LQNEDENIFHMAS(1.31)PT(-1.31)ER	13	3	704.302	-0.070114	1.0434	1.0434	NaN	NaN	1.2912	1.2912	NaN	NaN	NaN
A2AG58;A2AG58-2	205;205	A2AG58	A2AG58	Uncharacterized protein CXorf23 homolog		>sp|A2AG58|CX023_MOUSE Uncharacterized protein CXorf23 homolog OS=Mus musculus PE=2 SV=1;>sp|A2AG58-2|CX023_MOUSE Isoform 2 of Uncharacterized protein CXorf23 homolog OS=Mus musculus	0.999999	59.6075	0.999736	37.7791	6.89193e-06	150.22					0.999973	45.8278	0.000383181	109.24	0.999999	59.6075	5.90978e-05	144.27		1	S	DELRHQRVQEESYPQSPRRGSEDFGTRNPFQ	X;X;X;X;X;X;X;X;X;X;X;X;X;X;X;Phospho (STY);X;X;X;X;X;X;X;X;X;X;X;X;X;X;X	XXXXXXXPPPPPPPPPPPXXXXXXXXXXXXX	6.89193e-06	150.22	144.27	_VQEESYPQS(ph)PR_	VQEESYPQS(1)PR	VQEES(-66.89)Y(-59.61)PQS(59.61)PR	9	2	700.298	0.36765	0.60713	0.60713	NaN	NaN	0.62827	0.62827	NaN	NaN	NaN
A2AG68;Q64430	1465;1464	A2AG68	A2AG68	Copper-transporting ATPase 1	Atp7a;Atp7a	>tr|A2AG68|A2AG68_MOUSE ATPase, Cu++ transporting, alpha polypeptide OS=Mus musculus GN=Atp7a PE=3 SV=1;>sp|Q64430|ATP7A_MOUSE Copper-transporting ATPase 1 OS=Mus musculus GN=Atp7a PE=1 SV=3	0.954603	16.034	0.954603	16.034	0.000856466	87.388	0.71293	8.46202	0.041277	43.791										1	S	NYSRASINSLLSDKRSLNSVVTSEPDKHSLL	X;X;X;X;X;X;X;X;X;X;X;X;X;X;X;Phospho (STY);X;X;X;X;X;X;X;X;X;X;X;X;X;X;X	XXXXXXXXXXXXXXPPPPPPPPPPPPPXXXX	0.000856466	87.388	87.388	_RS(ph)LNSVVTSEPDK_	RS(0.955)LNS(0.015)VVT(0.006)S(0.024)EPDK	RS(16.03)LNS(-17.9)VVT(-21.92)S(-16.03)EPDK	2	2	756.359	-0.0026192	0.85857	0.85857	NaN	NaN	1.1208	1.1208	NaN	NaN	NaN
A2AGH6;A2AGH9;A2AGH6-2;A2AGH8	699;699;699;699	A2AGH6	A2AGH6	Mediator of RNA polymerase II transcription subunit 12	Med12;Med12;Med12	>sp|A2AGH6|MED12_MOUSE Mediator of RNA polymerase II transcription subunit 12 OS=Mus musculus GN=Med12 PE=2 SV=1;>tr|A2AGH9|A2AGH9_MOUSE Mediator of RNA polymerase II transcription subunit 12 OS=Mus musculus GN=Med12 PE=4 SV=1;>sp|A2AGH6-2|MED12_MOUSE Isof	1	120.627	1	58.7119	0.000217418	113.47	1	86.4882	0.00293201	89.484	1	67.6459	0.028125	67.646	1	120.627	5.42126e-05	123.08		1;2	S	DFSLFSPTMPCEGKGSPSPEKPDVEKEVKPP	X;X;X;X;X;X;X;X;X;X;X;X;X;X;X;Phospho (STY);X;Phospho (STY);X;X;X;X;X;X;X;X;X;X;X;X;X	XXXXXXXXXXXXXXPPPPPPPPPPPPXXXXX	5.42126e-05	123.08	120.63	_GS(ph)PS(ph)PEKPDVEK_	GS(1)PS(1)PEKPDVEK	GS(120.63)PS(120.63)PEKPDVEK	2	2	715.286	-0.15717	1.2442	1.2442	0.91399	NaN	1.3851	1.3851	0.8705	NaN	NaN
A2AGH6;A2AGH9;A2AGH6-2;A2AGH8	701;701;701;701	A2AGH6	A2AGH6	Mediator of RNA polymerase II transcription subunit 12	Med12;Med12;Med12	>sp|A2AGH6|MED12_MOUSE Mediator of RNA polymerase II transcription subunit 12 OS=Mus musculus GN=Med12 PE=2 SV=1;>tr|A2AGH9|A2AGH9_MOUSE Mediator of RNA polymerase II transcription subunit 12 OS=Mus musculus GN=Med12 PE=4 SV=1;>sp|A2AGH6-2|MED12_MOUSE Isof	1	120.627	1	58.7119	0.000217418	113.47	1	86.4882	0.00293201	89.484	1	67.6459	0.028125	67.646	1	120.627	5.42126e-05	123.08		1;2	S	SLFSPTMPCEGKGSPSPEKPDVEKEVKPPAK	X;X;X;X;X;X;X;X;X;X;X;X;X;Phospho (STY);X;Phospho (STY);X;X;X;X;X;X;X;X;X;X;X;X;X;X;X	XXXXXXXXXXXXPPPPPPPPPPPPXXXXXXX	5.42126e-05	123.08	120.63	_GS(ph)PS(ph)PEKPDVEK_	GS(1)PS(1)PEKPDVEK	GS(120.63)PS(120.63)PEKPDVEK	4	2	715.286	-0.15717	1.2418	1.2418	0.91399	NaN	1.3767	1.3767	0.8705	NaN	NaN
A2AGQ4;E9QN47;Q80U28-14;A2AGQ6;A2AGQ5;A2AGR0;Q80U28;A2AGQ9;Q80U28-15;A2AGQ7;Q80U28-2;A2AGQ8;Q80U28-3;A2AGQ2;A2AGQ3;Q80U28-4;Q80U28-5;Q80U28-6;Q80U28-7;Q80U28-8;Q80U28-9;Q80U28-10;Q80U28-11;A2AGR1;Q80U28-12;A6PWP8;Q80U28-13	817;817;817;817;817;817;817;798;817;817;817;774;817;798;774;817;792;792;798;817;792;792;798;774;792;817;817	A2AGQ4	A2AGQ4	MAP kinase-activating death domain protein	Madd;Madd;Madd;Madd;Madd;Madd;Madd;Madd;Madd;Madd;Madd;Madd;Madd	>tr|A2AGQ4|A2AGQ4_MOUSE MAP kinase-activating death domain protein OS=Mus musculus GN=Madd PE=4 SV=1;>tr|E9QN47|E9QN47_MOUSE MAP kinase-activating death domain protein OS=Mus musculus GN=Madd PE=4 SV=2;>sp|Q80U28-14|MADD_MOUSE Isoform 14 of MAP kinase-acti	0.539911	3.66933					0.450063	0.133186	0.000399153	93.478					0.539911	3.66933	0.0194474	54.023		1	S	SRAQKLLRPNSLKLASDSDAESDSRASSPNS	X;X;X;X;X;X;X;X;X;X;X;X;X;X;X;Phospho (STY);X;X;X;X;X;X;X;X;X;X;X;X;X;X;X	XXXXXXXXXXXXXPPPPPPPPPPPPXXXXXX	0.000399153	93.478	54.023	_LAS(ph)DSDAESDSR_	LAS(0.54)DS(0.15)DAES(0.078)DS(0.232)R	LAS(3.67)DS(-5.56)DAES(-8.41)DS(-3.67)R	3	2	666.751	0.17749	1.1635	1.1635	NaN	NaN	1.1438	1.1438	NaN	NaN	NaN
A2AGQ4;E9QN47;Q80U28-14;A2AGQ6;A2AGQ5;A2AGR0;Q80U28;A2AGQ9;Q80U28-15;A2AGQ7;Q80U28-2;A2AGQ8;Q80U28-3;A2AGQ2;A2AGQ3;Q80U28-4;Q80U28-5;Q80U28-6;Q80U28-7;Q80U28-8;Q80U28-9;Q80U28-10;Q80U28-11;A2AGR1;Q80U28-12;A6PWP8;Q80U28-13	819;819;819;819;819;819;819;800;819;819;819;776;819;800;776;819;794;794;800;819;794;794;800;776;794;819;819	A2AGQ4	A2AGQ4	MAP kinase-activating death domain protein	Madd;Madd;Madd;Madd;Madd;Madd;Madd;Madd;Madd;Madd;Madd;Madd;Madd	>tr|A2AGQ4|A2AGQ4_MOUSE MAP kinase-activating death domain protein OS=Mus musculus GN=Madd PE=4 SV=1;>tr|E9QN47|E9QN47_MOUSE MAP kinase-activating death domain protein OS=Mus musculus GN=Madd PE=4 SV=2;>sp|Q80U28-14|MADD_MOUSE Isoform 14 of MAP kinase-acti	0.992755	21.3707													0.992755	21.3707	1.37371e-05	119.96		1	S	AQKLLRPNSLKLASDSDAESDSRASSPNSTV	X;X;X;X;X;X;X;X;X;X;X;X;X;X;X;Phospho (STY);X;X;X;X;X;X;X;X;X;X;X;X;X;X;X	XXXXXXXXXXXPPPPPPPPPPPPXXXXXXXX	1.37371e-05	119.96	119.96	_LASDS(ph)DAESDSR_	LAS(0.007)DS(0.993)DAESDSR	LAS(-21.37)DS(21.37)DAES(-53.75)DS(-92.83)R	5	2	666.751	0.54558	1.1276	1.1276	NaN	NaN	1.0695	1.0695	NaN	NaN	NaN
A2AGQ4;E9QN47;Q80U28-14;A2AGQ6;A2AGQ5;A2AGR0;Q80U28;A2AGQ9;Q80U28-15;A2AGQ7;Q80U28-2;A2AGQ8;Q80U28-3;A2AGQ2;A2AGQ3;Q80U28-4;Q80U28-5;Q80U28-6;Q80U28-7;Q80U28-8;Q80U28-9;Q80U28-10;Q80U28-11;A2AGR1;Q80U28-12;A6PWP8;Q80U28-13	825;825;825;825;825;825;825;806;825;825;825;782;825;806;782;825;800;800;806;825;800;800;806;782;800;825;825	A2AGQ4	A2AGQ4	MAP kinase-activating death domain protein	Madd;Madd;Madd;Madd;Madd;Madd;Madd;Madd;Madd;Madd;Madd;Madd;Madd	>tr|A2AGQ4|A2AGQ4_MOUSE MAP kinase-activating death domain protein OS=Mus musculus GN=Madd PE=4 SV=1;>tr|E9QN47|E9QN47_MOUSE MAP kinase-activating death domain protein OS=Mus musculus GN=Madd PE=4 SV=2;>sp|Q80U28-14|MADD_MOUSE Isoform 14 of MAP kinase-acti	0.795319	7.09435					0.795319	7.09435	0.000547588	89.624					0.575489	4.50333	0.00300458	73.834		1	S	PNSLKLASDSDAESDSRASSPNSTVSNNSTE	X;X;X;X;X;X;X;X;X;X;X;X;X;X;X;Phospho (STY);X;X;X;X;X;X;X;X;X;X;X;X;X;X;X	XXXXXPPPPPPPPPPPPXXXXXXXXXXXXXX	0.000547588	89.624	89.624	_LASDSDAESDS(ph)R_	LAS(0.155)DS(0.008)DAES(0.042)DS(0.795)R	LAS(-7.09)DS(-20.14)DAES(-12.8)DS(7.09)R	11	2	666.751	0.62539	1.1061	1.1061	NaN	NaN	1.3043	1.3043	NaN	NaN	NaN
A2AHC3	1069	A2AHC3	A2AHC3	Calmodulin-regulated spectrin-associated protein 1	Camsap1	>sp|A2AHC3|CAMP1_MOUSE Calmodulin-regulated spectrin-associated protein 1 OS=Mus musculus GN=Camsap1 PE=1 SV=1	0.999994	52.1806	0.999887	39.4638	0.000296071	85.203	0.998937	29.7311	6.19259e-05	99.092	0.999792	36.8255	9.13487e-06	113.86	0.999994	52.1806	1.88265e-12	137.69		1	S	QDQKIKAPVHFVEPLSPTGVPGHRKPPRLGQ	X;X;X;X;X;X;X;X;X;X;X;X;X;X;X;Phospho (STY);X;X;X;X;X;X;X;X;X;X;X;X;X;X;X	XXXXXXPPPPPPPPPPPPPPPPPPXXXXXXX	1.88265e-12	137.69	137.69	_APVHFVEPLS(ph)PTGVPGHR_	APVHFVEPLS(1)PTGVPGHR	APVHFVEPLS(52.18)PT(-52.18)GVPGHR	10	3	659.663	0.023484	0.67021	0.67021	NaN	NaN	0.86384	0.86384	NaN	NaN	NaN
A2AHC3	1133	A2AHC3	A2AHC3	Calmodulin-regulated spectrin-associated protein 1	Camsap1	>sp|A2AHC3|CAMP1_MOUSE Calmodulin-regulated spectrin-associated protein 1 OS=Mus musculus GN=Camsap1 PE=1 SV=1	1	62.3571	0.999958	43.7403	7.06383e-80	253.16	1	62.3571	2.6936e-23	209.39	1	106.424	3.82887e-06	166.86	0.999904	40.1857	1.71581e-16	199.31		1;2	S	TLPQSRSLPPSTHPRSPSDPGGELPEKCLFD	X;X;X;X;X;X;X;X;X;X;X;X;X;X;X;Phospho (STY);X;Phospho (STY);X;X;X;X;X;X;X;X;X;X;X;X;X	XXXXXXXXXXXXXXXPPPPPPPPPPPPXXXX	7.06383e-80	253.16	62.357	_S(ph)PS(ph)DPGGELPEK_	S(1)PS(1)DPGGELPEK	S(62.36)PS(62.36)DPGGELPEK	1	2	686.757	-0.053191	0.69305	0.69305	1.2647	NaN	0.96061	0.96061	1.2558	NaN	NaN
A2AHC3	1135	A2AHC3	A2AHC3	Calmodulin-regulated spectrin-associated protein 1	Camsap1	>sp|A2AHC3|CAMP1_MOUSE Calmodulin-regulated spectrin-associated protein 1 OS=Mus musculus GN=Camsap1 PE=1 SV=1	1	62.3571	0.512219	0.212309	4.96289e-11	184.02	1	62.3571	0.0420859	62.357	1	106.424	0.00278571	109.83	0.908785	9.98396	4.7038e-06	132.31		1;2	S	PQSRSLPPSTHPRSPSDPGGELPEKCLFDSY	X;X;X;X;X;X;X;X;X;X;X;X;X;Phospho (STY);X;Phospho (STY);X;X;X;X;X;X;X;X;X;X;X;X;X;X;X	XXXXXXXXXXXXXPPPPPPPPPPPPXXXXXX	4.96289e-11	184.02	62.357	_S(ph)PS(ph)DPGGELPEK_	S(1)PS(1)DPGGELPEK	S(62.36)PS(62.36)DPGGELPEK	3	2	686.757	-0.053191	1.2156	1.2156	1.2647	NaN	1.1511	1.1511	1.2558	NaN	NaN
A2AHC3;A2AHC3-2;A2AHC4	560;580;580	A2AHC3	A2AHC3	Calmodulin-regulated spectrin-associated protein 1	Camsap1;Camsap1	>sp|A2AHC3|CAMP1_MOUSE Calmodulin-regulated spectrin-associated protein 1 OS=Mus musculus GN=Camsap1 PE=1 SV=1;>sp|A2AHC3-2|CAMP1_MOUSE Isoform 2 of Calmodulin-regulated spectrin-associated protein 1 OS=Mus musculus GN=Camsap1;>tr|A2AHC4|A2AHC4_MOUSE Calmo	0.792404	5.81727	0.5	0	8.77103e-09	153.22	0.5	0	0.00161233	106.6	0.792404	5.81727	1.24149e-08	143.28	0.5	0	0.00151905	107.82		1	S	IRTDVSPPSPQMPRTSPQAPGLVASIRSPQR	X;X;X;X;X;X;X;X;Phospho (STY);X;X;X;X;X;X;Phospho (STY);X;X;X;X;X;X;X;X;X;X;X;X;X;X;X	XXXXXXXXXXXXXXPPPPPPPPPPPPPXXXX	8.77103e-09	153.22	111.34	_TS(ph)PQAPGLVASIR_	T(0.208)S(0.792)PQAPGLVASIR	T(-5.82)S(5.82)PQAPGLVAS(-97.08)IR	2	2	688.85	-0.10149	1.0869	1.0869	NaN	NaN	1.132	1.132	NaN	NaN	NaN
A2AHC3	1407	A2AHC3	A2AHC3	Calmodulin-regulated spectrin-associated protein 1	Camsap1	>sp|A2AHC3|CAMP1_MOUSE Calmodulin-regulated spectrin-associated protein 1 OS=Mus musculus GN=Camsap1 PE=1 SV=1	1	78.0409					1	85.3585	6.69138e-05	109.1					1	78.0409	0.000547588	89.624		1	S	PESVYSGGTPSHRVESLEALPILSRNPSRST	X;X;X;X;X;X;X;X;X;X;X;X;X;X;X;Phospho (STY);X;X;X;X;X;X;X;X;X;X;X;X;X;X;X	XXXXXXXXXXXXXPPPPPPPPPPPPXXXXXX	6.69138e-05	109.1	89.624	_VES(ph)LEALPILSR_	VES(1)LEALPILSR	VES(78.04)LEALPILS(-78.04)R	3	2	703.868	0.44894	1.9462	1.9462	NaN	NaN	1.8793	1.8793	NaN	NaN	NaN
Q8BWJ3;A2AHQ7	729;729	Q8BWJ3	Q8BWJ3	Phosphorylase b kinase regulatory subunit alpha, liver isoform	Phka2;Phka2	>sp|Q8BWJ3|KPB2_MOUSE Phosphorylase b kinase regulatory subunit alpha, liver isoform OS=Mus musculus GN=Phka2 PE=1 SV=1;>tr|A2AHQ7|A2AHQ7_MOUSE Phosphorylase b kinase regulatory subunit alpha, liver isoform OS=Mus musculus GN=Phka2 PE=4 SV=1	1	87.6871	1	89.5544	3.11191e-70	248.06	1	92.6246	3.77699e-118	274.6	1	120.234	3.77699e-118	274.6	1	87.6871	3.54366e-34	214.81		1	S	FPMILPTKVLSGHRKSLNLVDSPQPLLKTTP	X;X;X;X;X;X;X;X;X;X;X;X;X;X;X;Phospho (STY);X;X;X;X;X;X;X;X;X;X;X;X;X;X;X	XXXXXXXXXXXXXXXPPPPPPPPPPPPPXXX	3.77699e-118	274.6	137.73	_S(ph)LNLVDSPQPLLK_	S(1)LNLVDSPQPLLK	S(87.69)LNLVDS(-87.69)PQPLLK	1	2	752.395	-0.22998	0.77506	0.77506	NaN	NaN	0.92253	0.92253	NaN	NaN	NaN
A2AI52;Q80U87	689;678	A2AI52	A2AI52	Ubiquitin carboxyl-terminal hydrolase;Ubiquitin carboxyl-terminal hydrolase 8	Usp8;Usp8	>tr|A2AI52|A2AI52_MOUSE Ubiquitin carboxyl-terminal hydrolase OS=Mus musculus GN=Usp8 PE=3 SV=1;>sp|Q80U87|UBP8_MOUSE Ubiquitin carboxyl-terminal hydrolase 8 OS=Mus musculus GN=Usp8 PE=1 SV=2	0.495044	0					0.495044	0	0.00812518	101.64	0.494657	0	6.1772e-08	136.04	0.46264	0	0.0021186	73.783			S	QVPAERDREPSKLKRSYSSPDITQALQEEEK	X;X;X;X;X;X;X;X;X;X;X;X;X;X;X;Phospho (STY);X;X;X;X;X;X;X;X;X;X;X;X;X;X;X	XXXXXXXXXXXXXXXPPPPPPPPPPPPPPPP	6.1772e-08	136.04	101.64	_S(ph)YSSPDITQALQEEEK_	S(0.495)Y(0.002)S(0.495)S(0.008)PDITQALQEEEK	S(0)Y(-24.79)S(0)S(-17.79)PDIT(-42.13)QALQEEEK	1	2	952.912	-0.19179
A2AI52;Q80U87	691;680	A2AI52	A2AI52	Ubiquitin carboxyl-terminal hydrolase;Ubiquitin carboxyl-terminal hydrolase 8	Usp8;Usp8	>tr|A2AI52|A2AI52_MOUSE Ubiquitin carboxyl-terminal hydrolase OS=Mus musculus GN=Usp8 PE=3 SV=1;>sp|Q80U87|UBP8_MOUSE Ubiquitin carboxyl-terminal hydrolase 8 OS=Mus musculus GN=Usp8 PE=1 SV=2	0.92703	12.706					0.92703	12.706	0.00812518	101.64	0.830792	7.35226	6.1772e-08	136.04	0.867606	8.30418	0.000188266	141.18		1	S	PAERDREPSKLKRSYSSPDITQALQEEEKRR	X;X;X;X;X;X;X;X;X;X;X;X;X;X;X;Phospho (STY);X;X;X;X;X;X;X;X;X;X;X;X;X;X;X	XXXXXXXXXXXXXPPPPPPPPPPPPPPPPPX	6.1772e-08	141.18	40.349	_SYS(ph)SPDITQALQEEEKR_	S(0.011)Y(0.001)S(0.927)S(0.05)PDIT(0.011)QALQEEEKR	S(-19.3)Y(-28.3)S(12.71)S(-12.71)PDIT(-19.26)QALQEEEKR	3	3	687.644	-0.59687	0.82008	0.82008	NaN	NaN	1.0383	1.0383	NaN	NaN	NaN
Q923J1;A2AI57	1403;1403	Q923J1	Q923J1	Transient receptor potential cation channel subfamily M member 7	Trpm7;Trpm7	>sp|Q923J1|TRPM7_MOUSE Transient receptor potential cation channel subfamily M member 7 OS=Mus musculus GN=Trpm7 PE=1 SV=1;>tr|A2AI57|A2AI57_MOUSE Transient receptor potential cation channel subfamily M member 7 OS=Mus musculus GN=Trpm7 PE=4 SV=1	0.989076	20.4466	0.804546	6.18411	0.00192571	78.505	0.989076	20.4466	0.000232841	97.797										1	S	NSSPHMSSPPTKFSVSTPSQPSCKSHLESTT	X;X;X;X;X;X;X;X;X;X;X;X;X;X;X;Phospho (STY);X;X;X;X;X;X;X;X;X;X;X;X;X;X;X	XXXXXXXXXXXXPPPPPPPPPPPPXXXXXXX	0.000232841	97.797	84.173	_FSVS(ph)TPSQPSCK_	FS(0.002)VS(0.989)T(0.009)PSQPSCK	FS(-27.88)VS(20.45)T(-20.45)PS(-34.07)QPS(-56.41)CK	4	2	702.797	0.065854	1.182	1.182	NaN	NaN	1.5101	1.5101	NaN	NaN	NaN
Q923J1;A2AI57	1298;1298	Q923J1	Q923J1	Transient receptor potential cation channel subfamily M member 7	Trpm7;Trpm7	>sp|Q923J1|TRPM7_MOUSE Transient receptor potential cation channel subfamily M member 7 OS=Mus musculus GN=Trpm7 PE=1 SV=1;>tr|A2AI57|A2AI57_MOUSE Transient receptor potential cation channel subfamily M member 7 OS=Mus musculus GN=Trpm7 PE=4 SV=1	0.541641	1.86015									0.541641	1.86015	7.42693e-05	93.5						1	S	PVRPLWKKPSAVNTLSSSLPQGDRESNNPFL	X;X;X;X;X;X;X;X;X;X;X;X;X;X;X;Phospho (STY);X;X;X;X;X;X;X;X;X;X;X;X;X;X;X	XXXXXXXPPPPPPPPPPPPPPPPPXXXXXXX	7.42693e-05	93.5	93.5	_KPSAVNTLS(ph)SSLPQGDR_	KPSAVNT(0.012)LS(0.542)S(0.093)S(0.353)LPQGDR	KPS(-43.01)AVNT(-16.46)LS(1.86)S(-7.64)S(-1.86)LPQGDR	9	2	918.946	0.3774	0.26382	0.26382	NaN	NaN	0.2577	0.2577	NaN	NaN	NaN
Q923J1;A2AI57	1299;1299	Q923J1	Q923J1	Transient receptor potential cation channel subfamily M member 7	Trpm7;Trpm7	>sp|Q923J1|TRPM7_MOUSE Transient receptor potential cation channel subfamily M member 7 OS=Mus musculus GN=Trpm7 PE=1 SV=1;>tr|A2AI57|A2AI57_MOUSE Transient receptor potential cation channel subfamily M member 7 OS=Mus musculus GN=Trpm7 PE=4 SV=1	0.82268	6.8459	0.82268	6.8459	3.63379e-05	99.86					0.578029	1.52741	0.00148182	70.072	0.555818	1.23897	2.27176e-05	112.53		1	S	VRPLWKKPSAVNTLSSSLPQGDRESNNPFLC	X;X;X;X;X;X;X;X;X;X;X;X;X;X;X;Phospho (STY);X;X;X;X;X;X;X;X;X;X;X;X;X;X;X	XXXXXXPPPPPPPPPPPPPPPPPXXXXXXXX	2.27176e-05	112.53	57.499	_KPSAVNTLSS(ph)SLPQGDR_	KPSAVNTLS(0.007)S(0.823)S(0.17)LPQGDR	KPS(-32.71)AVNT(-38.11)LS(-20.91)S(6.85)S(-6.85)LPQGDR	10	3	612.967	-0.21312	1.6012	1.6012	NaN	NaN	2.1928	2.1928	NaN	NaN	NaN
Q923J1;A2AI57	1300;1300	Q923J1	Q923J1	Transient receptor potential cation channel subfamily M member 7	Trpm7;Trpm7	>sp|Q923J1|TRPM7_MOUSE Transient receptor potential cation channel subfamily M member 7 OS=Mus musculus GN=Trpm7 PE=1 SV=1;>tr|A2AI57|A2AI57_MOUSE Transient receptor potential cation channel subfamily M member 7 OS=Mus musculus GN=Trpm7 PE=4 SV=1	0.991878	24.0002	0.801928	9.09204	3.63379e-05	99.86					0.973693	18.6971	0.0345083	87.062	0.991878	24.0002	3.29663e-07	126.9		1	S	RPLWKKPSAVNTLSSSLPQGDRESNNPFLCN	X;X;X;X;X;X;X;X;X;X;X;X;X;X;X;Phospho (STY);X;X;X;X;X;X;X;X;X;X;X;X;X;X;X	XXXXXPPPPPPPPPPPPPPPPPXXXXXXXXX	3.29663e-07	126.9	126.9	_KPSAVNTLSSS(ph)LPQGDR_	KPSAVNTLS(0.004)S(0.004)S(0.992)LPQGDR	KPS(-72.68)AVNT(-36.44)LS(-24)S(-24)S(24)LPQGDR	11	2	918.946	-0.12704	0.84921	0.84921	NaN	NaN	0.80801	0.80801	NaN	NaN	NaN
Q923J1;A2AI57	1565;1564	Q923J1	Q923J1	Transient receptor potential cation channel subfamily M member 7	Trpm7;Trpm7	>sp|Q923J1|TRPM7_MOUSE Transient receptor potential cation channel subfamily M member 7 OS=Mus musculus GN=Trpm7 PE=1 SV=1;>tr|A2AI57|A2AI57_MOUSE Transient receptor potential cation channel subfamily M member 7 OS=Mus musculus GN=Trpm7 PE=4 SV=1	0.996001	23.9631	0.996001	23.9631	0.000547662	97.797	0.994314	22.4275	0.000215694	113.65	0.788652	5.71887	0.000883816	91.076	0.985451	18.308	0.000150168	116.58		1	S	NYYYSAVERNNLMRLSQSIPFVPVPPRGEPV	X;X;X;X;X;X;X;X;X;X;X;X;X;X;X;Phospho (STY);X;X;X;X;X;X;X;X;X;X;X;X;X;X;X	XXXXXXXXXXXXXXPPPPPPPPPPPPPXXXX	0.000150168	116.58	97.797	_LS(ph)QSIPFVPVPPR_	LS(0.996)QS(0.004)IPFVPVPPR	LS(23.96)QS(-23.96)IPFVPVPPR	2	2	758.9	0.25611	0.89079	0.89079	NaN	NaN	1.0254	1.0254	NaN	NaN	NaN
Q923J1;A2AI57	1567;1566	Q923J1	Q923J1	Transient receptor potential cation channel subfamily M member 7	Trpm7;Trpm7	>sp|Q923J1|TRPM7_MOUSE Transient receptor potential cation channel subfamily M member 7 OS=Mus musculus GN=Trpm7 PE=1 SV=1;>tr|A2AI57|A2AI57_MOUSE Transient receptor potential cation channel subfamily M member 7 OS=Mus musculus GN=Trpm7 PE=4 SV=1	0.987474	18.9671	0.800928	6.04584	0.00153034	83.37	0.982515	17.4967	0.000439988	102.29					0.987474	18.9671	0.00068421	95.067		1	S	YYSAVERNNLMRLSQSIPFVPVPPRGEPVTV	X;X;X;X;X;X;X;X;X;X;X;X;X;X;X;Phospho (STY);X;X;X;X;X;X;X;X;X;X;X;X;X;X;X	XXXXXXXXXXXXPPPPPPPPPPPPPXXXXXX	0.000439988	102.29	92.8	_LSQS(ph)IPFVPVPPR_	LS(0.013)QS(0.987)IPFVPVPPR	LS(-18.97)QS(18.97)IPFVPVPPR	4	2	758.9	0.17637	1.2109	1.2109	NaN	NaN	1.1486	1.1486	NaN	NaN	NaN
Q923J1;A2AI57	1502;1501	Q923J1	Q923J1	Transient receptor potential cation channel subfamily M member 7	Trpm7;Trpm7	>sp|Q923J1|TRPM7_MOUSE Transient receptor potential cation channel subfamily M member 7 OS=Mus musculus GN=Trpm7 PE=1 SV=1;>tr|A2AI57|A2AI57_MOUSE Transient receptor potential cation channel subfamily M member 7 OS=Mus musculus GN=Trpm7 PE=4 SV=1	0.979168	17.4792	0.979168	17.4792	0.000372158	98.796														1	S	TSLHSVQAESCSRRASTEDSPEVDSKAALLP	X;X;X;X;X;X;X;X;X;X;X;X;X;X;X;Phospho (STY);X;X;X;X;X;X;X;X;X;X;X;X;X;X;X	XXXXXXXXXXXXXPPPPPPPPPPPPPXXXXX	0.000372158	98.796	98.796	_RAS(ph)TEDSPEVDSK_	RAS(0.979)T(0.017)EDS(0.003)PEVDSK	RAS(17.48)T(-17.48)EDS(-24.68)PEVDS(-74.74)K	3	2	750.814	-0.27526	0.72905	0.72905	NaN	NaN	1.0317	1.0317	NaN	NaN	NaN
E9PZY8;A2AIV2	1627;1577	E9PZY8	E9PZY8	Protein virilizer homolog	1110037F02Rik;Kiaa1429	>tr|E9PZY8|E9PZY8_MOUSE Protein 1110037F02Rik OS=Mus musculus GN=1110037F02Rik PE=4 SV=1;>sp|A2AIV2|VIR_MOUSE Protein virilizer homolog OS=Mus musculus GN=Kiaa1429 PE=1 SV=1	0.966648	14.6215	0.944498	12.3089	7.20324e-15	193.52	0.966648	14.6215	0.000128673	167.09	0.947865	12.5966	5.53266e-05	171.32	0.848251	8.06106	8.4215e-05	169.65		1	S	FDLHSELERSFLSEPSSPGRSKTTKGFKLGK	X;X;X;X;X;X;X;X;X;X;X;X;X;X;X;Phospho (STY);X;X;X;X;X;X;X;X;X;X;X;X;X;X;X	XXXXXXXXXPPPPPPPPPPPXXXXXXXXXXX	7.20324e-15	193.52	167.09	_SFLSEPS(ph)SPGR_	SFLSEPS(0.967)S(0.033)PGR	S(-133.9)FLS(-75.43)EPS(14.62)S(-14.62)PGR	7	2	622.271	0.053548	1.3636	1.3636	NaN	NaN	1.3679	1.3679	NaN	NaN	NaN
E9PZY8;A2AIV2	1628;1578	E9PZY8	E9PZY8	Protein virilizer homolog	1110037F02Rik;Kiaa1429	>tr|E9PZY8|E9PZY8_MOUSE Protein 1110037F02Rik OS=Mus musculus GN=1110037F02Rik PE=4 SV=1;>sp|A2AIV2|VIR_MOUSE Protein virilizer homolog OS=Mus musculus GN=Kiaa1429 PE=1 SV=1	0.975423	15.9866	0.975423	15.9866	3.2087e-15	198.62	0.850921	7.56472	6.58207e-11	192.65					0.912641	10.1899	2.04301e-17	159.09		1	S	DLHSELERSFLSEPSSPGRSKTTKGFKLGKH	X;X;X;X;X;X;X;X;X;X;X;X;X;X;X;Phospho (STY);X;X;X;X;X;X;X;X;X;X;X;X;X;X;X	XXXXXXXXPPPPPPPPPPPXXXXXXXXXXXX	2.04301e-17	198.62	198.62	_SFLSEPSS(ph)PGR_	SFLSEPS(0.025)S(0.975)PGR	S(-165.43)FLS(-91.96)EPS(-15.99)S(15.99)PGR	8	2	622.271	0.54821	0.52579	0.52579	NaN	NaN	0.68475	0.68475	NaN	NaN	NaN
E9PZY8;A2AIV2;A2AIV2-2	133;133;133	E9PZY8	E9PZY8	Protein virilizer homolog	1110037F02Rik;Kiaa1429	>tr|E9PZY8|E9PZY8_MOUSE Protein 1110037F02Rik OS=Mus musculus GN=1110037F02Rik PE=4 SV=1;>sp|A2AIV2|VIR_MOUSE Protein virilizer homolog OS=Mus musculus GN=Kiaa1429 PE=1 SV=1;>sp|A2AIV2-2|VIR_MOUSE Isoform 2 of Protein virilizer homolog OS=Mus musculus GN=K	0.948637	12.6645					0.948637	12.6645	1.45539e-56	166.03	0.823374	6.68543	1.27855e-26	127.24	0.92719	11.0526	1.1215e-26	128.38		1	S	NCLTLAIYGSVDRVISHDRDSPPPPPPPPPP	X;X;X;X;X;X;X;X;X;X;X;X;X;X;X;Phospho (STY);X;X;X;X;X;X;X;X;X;X;X;X;X;X;X	XXXXXXXXXXXXXPPPPPPPPPPPPPPPPPP	1.45539e-56	166.03	136.8	_VIS(ph)HDRDSPPPPPPPPPPPQPQPTLK_	VIS(0.949)HDRDS(0.051)PPPPPPPPPPPQPQPTLK	VIS(12.66)HDRDS(-12.66)PPPPPPPPPPPQPQPT(-113.68)LK	3	3	956.82	-0.060611	1.043	1.043	NaN	NaN	1.0485	1.0485	NaN	NaN	NaN
E9PZY8;A2AIV2;A2AIV2-2	138;138;138	E9PZY8	E9PZY8	Protein virilizer homolog	1110037F02Rik;Kiaa1429	>tr|E9PZY8|E9PZY8_MOUSE Protein 1110037F02Rik OS=Mus musculus GN=1110037F02Rik PE=4 SV=1;>sp|A2AIV2|VIR_MOUSE Protein virilizer homolog OS=Mus musculus GN=Kiaa1429 PE=1 SV=1;>sp|A2AIV2-2|VIR_MOUSE Isoform 2 of Protein virilizer homolog OS=Mus musculus GN=K	0.996636	24.7166	0.791692	5.79851	1.36351e-23	119.61	0.996636	24.7166	1.27634e-56	167.06	0.892251	9.18072	1.27855e-26	127.24	0.994127	22.2862	3.80879e-82	187.76		1	S	AIYGSVDRVISHDRDSPPPPPPPPPPPQPQP	X;X;X;X;X;X;X;X;X;X;X;X;X;X;X;Phospho (STY);X;X;X;X;X;X;X;X;X;X;X;X;X;X;X	XXXXXXXXPPPPPPPPPPPPPPPPPPPPPPP	3.80879e-82	187.76	162.43	_VISHDRDS(ph)PPPPPPPPPPPQPQPTLK_	VIS(0.003)HDRDS(0.997)PPPPPPPPPPPQPQPTLK	VIS(-24.72)HDRDS(24.72)PPPPPPPPPPPQPQPT(-126.73)LK	8	3	956.82	0.5884	0.52537	0.52537	NaN	NaN	0.65219	0.65219	NaN	NaN	NaN
Q9JII1;A2AIX0	138;138	Q9JII1	Q9JII1	72 kDa inositol polyphosphate 5-phosphatase	Inpp5e;Inpp5e	>sp|Q9JII1|INP5E_MOUSE 72 kDa inositol polyphosphate 5-phosphatase OS=Mus musculus GN=Inpp5e PE=1 SV=1;>tr|A2AIX0|A2AIX0_MOUSE 72 kDa inositol polyphosphate 5-phosphatase OS=Mus musculus GN=Inpp5e PE=4 SV=1	0.391469	0					0.391469	0	9.30639e-05	120.77											S	SVAQSPAYSRPLPCLSTSLQEIPKSRRATGS	X;X;X;X;X;X;X;X;X;X;X;X;X;X;X;Phospho (STY);X;X;X;X;X;X;X;X;X;X;X;X;X;X;X	XXXXXXXXXXPPPPPPPPPPPPPPXXXXXXX	9.30639e-05	120.77	120.77	_PLPCLS(ph)TSLQEIPK_	PLPCLS(0.391)T(0.391)S(0.217)LQEIPK	PLPCLS(0)T(0)S(-2.56)LQEIPK	6	2	831.912	-0.49031
Q9JII1;A2AIX0	140;140	Q9JII1	Q9JII1	72 kDa inositol polyphosphate 5-phosphatase	Inpp5e;Inpp5e	>sp|Q9JII1|INP5E_MOUSE 72 kDa inositol polyphosphate 5-phosphatase OS=Mus musculus GN=Inpp5e PE=1 SV=1;>tr|A2AIX0|A2AIX0_MOUSE 72 kDa inositol polyphosphate 5-phosphatase OS=Mus musculus GN=Inpp5e PE=4 SV=1	0.94508	13.2388					0.83483	9.61012	0.000817792	87.429					0.94508	13.2388	0.000639222	91.317		1	S	AQSPAYSRPLPCLSTSLQEIPKSRRATGSEG	X;X;X;X;X;X;X;X;X;X;X;X;X;X;X;Phospho (STY);X;X;X;X;X;X;X;X;X;X;X;X;X;X;X	XXXXXXXXPPPPPPPPPPPPPPXXXXXXXXX	0.000639222	91.317	91.317	_PLPCLSTS(ph)LQEIPK_	PLPCLS(0.01)T(0.045)S(0.945)LQEIPK	PLPCLS(-19.72)T(-13.24)S(13.24)LQEIPK	8	2	831.912	-0.73227	0.7485	0.7485	NaN	NaN	0.77118	0.77118	NaN	NaN	NaN
Q9JII1;A2AIX0	259;259	Q9JII1	Q9JII1	72 kDa inositol polyphosphate 5-phosphatase	Inpp5e;Inpp5e	>sp|Q9JII1|INP5E_MOUSE 72 kDa inositol polyphosphate 5-phosphatase OS=Mus musculus GN=Inpp5e PE=1 SV=1;>tr|A2AIX0|A2AIX0_MOUSE 72 kDa inositol polyphosphate 5-phosphatase OS=Mus musculus GN=Inpp5e PE=4 SV=1	0.999959	43.854	0.999545	33.4138	0.0109375	81.017	0.999789	36.7588	5.91769e-05	152.07					0.999959	43.854	3.26692e-05	154.24		1	S	RSPLAGDDHSIHSARSFSLLAPIRTKDIRSR	X;Phospho (STY);X;X;X;X;X;X;X;X;X;X;X;X;X;Phospho (STY);X;X;X;X;X;X;X;X;X;X;X;X;X;X;X	XXXXXXXXXXXXXXXPPPPPPPPPXXXXXXX	3.26692e-05	154.24	154.24	_S(ph)FSLLAPIR_	S(1)FSLLAPIR	S(43.85)FS(-43.85)LLAPIR	1	2	542.284	0.46849	1.1228	1.1228	NaN	NaN	1.1015	1.1015	NaN	NaN	NaN
Q9JII1;A2AIX0	261;261	Q9JII1	Q9JII1	72 kDa inositol polyphosphate 5-phosphatase	Inpp5e;Inpp5e	>sp|Q9JII1|INP5E_MOUSE 72 kDa inositol polyphosphate 5-phosphatase OS=Mus musculus GN=Inpp5e PE=1 SV=1;>tr|A2AIX0|A2AIX0_MOUSE 72 kDa inositol polyphosphate 5-phosphatase OS=Mus musculus GN=Inpp5e PE=4 SV=1	0.96155	13.9808	0.5	0	0.070361	47.823	0.96155	13.9808	0.0054122	129.16					0.5	0	0.000152771	127.42		1	S	PLAGDDHSIHSARSFSLLAPIRTKDIRSRSY	X;X;X;X;X;X;X;X;X;X;X;X;X;X;X;Phospho (STY);X;X;X;X;X;X;X;X;X;X;X;X;X;X;X	XXXXXXXXXXXXXPPPPPPPPPXXXXXXXXX	0.000152771	129.16	129.16	_SFS(ph)LLAPIR_	S(0.038)FS(0.962)LLAPIR	S(-13.98)FS(13.98)LLAPIR	3	2	542.284	0.011843	0.095516	0.095516	NaN	NaN	0.1162	0.1162	NaN	NaN	NaN
A2AIX1;E9QAT4;F7BPW6	2101;2101;651	A2AIX1	A2AIX1		Sec16a;Sec16a;Sec16a	>tr|A2AIX1|A2AIX1_MOUSE Protein Sec16a OS=Mus musculus GN=Sec16a PE=4 SV=1;>tr|E9QAT4|E9QAT4_MOUSE Protein Sec16a OS=Mus musculus GN=Sec16a PE=4 SV=1;>tr|F7BPW6|F7BPW6_MOUSE Protein Sec16a (Fragment) OS=Mus musculus GN=Sec16a PE=4 SV=1	0.999888	41.1411	0.998926	30.6619	0.00448011	101.32	0.991342	25.0568	0.0294429	52.071					0.999888	41.1411	0.00266924	88.021		1	S	SPVWDLGSSSLTRAPSLTSDSEGKKPAQAVK	X;X;X;X;X;X;X;X;X;X;X;X;X;X;X;Phospho (STY);X;X;X;X;X;X;X;X;X;X;X;X;X;X;X	XXXXXXXXXXXXXPPPPPPPPPPPXXXXXXX	0.00266924	101.32	88.021	_APS(ph)LTSDSEGK_	APS(1)LTSDSEGK	APS(41.14)LT(-41.14)S(-47.55)DS(-47.55)EGK	3	2	586.248	-0.12099	0.5119	0.5119	NaN	NaN	0.58396	0.58396	NaN	NaN	NaN
A2AIX1;E9QAT4	1242;1242	A2AIX1	A2AIX1		Sec16a;Sec16a	>tr|A2AIX1|A2AIX1_MOUSE Protein Sec16a OS=Mus musculus GN=Sec16a PE=4 SV=1;>tr|E9QAT4|E9QAT4_MOUSE Protein Sec16a OS=Mus musculus GN=Sec16a PE=4 SV=1	0.99992	40.9424													0.99992	40.9424	0.00185903	111.83		2	S	ENHRYSEPERPSSRASHYSDQLAPRQGYPEG	X;X;X;X;X;X;X;X;X;X;X;X;X;X;X;Phospho (STY);X;X;Phospho (STY);X;X;X;X;X;X;X;X;X;X;X;X	XXXXXXXXXXXXXXPPPPPPPPPPPXXXXXX	0.00185903	111.83	111.83	_AS(ph)HYS(ph)DQLAPR_	AS(1)HYS(1)DQLAPR	AS(40.94)HY(-40.94)S(42.49)DQLAPR	2	2	702.771	-0.25048	0.71705	NaN	0.71705	NaN	0.71179	NaN	0.71179	NaN	0.39369
A2AIX1;E9QAT4	1245;1245	A2AIX1	A2AIX1		Sec16a;Sec16a	>tr|A2AIX1|A2AIX1_MOUSE Protein Sec16a OS=Mus musculus GN=Sec16a PE=4 SV=1;>tr|E9QAT4|E9QAT4_MOUSE Protein Sec16a OS=Mus musculus GN=Sec16a PE=4 SV=1	0.999944	42.4861					0.996367	24.6004	0.010774	87.447					0.999944	42.4861	0.00185903	111.83		1;2	S	RYSEPERPSSRASHYSDQLAPRQGYPEGYYN	X;X;X;X;X;X;X;X;X;X;X;X;Phospho (STY);X;X;Phospho (STY);X;X;X;X;X;X;X;X;X;X;X;X;X;X;X	XXXXXXXXXXXPPPPPPPPPPPXXXXXXXXX	0.000363408	111.83	111.83	_AS(ph)HYS(ph)DQLAPR_	AS(1)HYS(1)DQLAPR	AS(40.94)HY(-40.94)S(42.49)DQLAPR	5	2	702.771	-0.25048	2.1634	2.1634	0.71705	NaN	2.5802	2.5802	0.71179	NaN	0.39369
A2AIX1;E9QAT4	1342;1342	A2AIX1	A2AIX1		Sec16a;Sec16a	>tr|A2AIX1|A2AIX1_MOUSE Protein Sec16a OS=Mus musculus GN=Sec16a PE=4 SV=1;>tr|E9QAT4|E9QAT4_MOUSE Protein Sec16a OS=Mus musculus GN=Sec16a PE=4 SV=1	0.999528	33.2593					0.999528	33.2593	0.000457061	101.3										1	S	EKCDDHWRYDPRFTGSFDDDAEIHRDPYGEE	X;X;X;X;X;X;X;X;X;X;X;X;X;X;X;Phospho (STY);X;X;X;X;X;X;X;X;X;X;X;X;X;X;X	XXXXXXXXXXXXPPPPPPPPPPPPPXXXXXX	0.000457061	101.3	101.3	_FTGS(ph)FDDDAEIHR_	FTGS(1)FDDDAEIHR	FT(-33.26)GS(33.26)FDDDAEIHR	4	3	530.547	-0.096441	1.453	1.453	NaN	NaN	1.8056	1.8056	NaN	NaN	NaN
A2AIX1;E9QAT4	1028;1028	A2AIX1	A2AIX1		Sec16a;Sec16a	>tr|A2AIX1|A2AIX1_MOUSE Protein Sec16a OS=Mus musculus GN=Sec16a PE=4 SV=1;>tr|E9QAT4|E9QAT4_MOUSE Protein Sec16a OS=Mus musculus GN=Sec16a PE=4 SV=1	0.999774	37.5477	0.995239	26.4393	0.000335568	66.871	0.999774	37.5477	1.02848e-06	105.96	0.971796	16.8618	8.52703e-05	70.315	0.984562	19.0486	1.2189e-06	98.562		1	S	DFTLNRTLENPVRMYSPSPSDGPASQQPLPN	X;X;X;X;X;X;X;X;X;X;X;X;X;Oxidation (M);X;Phospho (STY);X;X;X;X;X;X;X;X;X;X;X;X;X;X;X	XXXXXXXXXXXXXPPPPPPPPPPPPPPPPPP	1.02848e-06	105.96	105.96	_MYS(ph)PSPSDGPASQQPLPNHPR_	MYS(1)PSPSDGPASQQPLPNHPR	MY(-37.55)S(37.55)PS(-43.76)PS(-51.19)DGPAS(-60.74)QQPLPNHPR	3	3	781.679	-0.65637	0.963	0.963	NaN	NaN	1.0391	1.0391	NaN	NaN	NaN
A2AIX1;E9QAT4	554;554	A2AIX1	A2AIX1		Sec16a;Sec16a	>tr|A2AIX1|A2AIX1_MOUSE Protein Sec16a OS=Mus musculus GN=Sec16a PE=4 SV=1;>tr|E9QAT4|E9QAT4_MOUSE Protein Sec16a OS=Mus musculus GN=Sec16a PE=4 SV=1	0.910224	10.0599	0.482681	0	0.00798853	44.238	0.910224	10.0599	1.58207e-44	170.61										1	S	RPDSVSSSYSSHSHRSPPGSARPQELVGTFI	X;X;X;X;X;X;X;X;X;X;X;X;X;X;X;Phospho (STY);X;X;X;X;X;X;X;X;X;X;X;X;X;X;X	XXXXXXXXXXXXXXXPPPPPPPPPPPPPPPP	1.58207e-44	170.61	170.61	_S(ph)PPGSARPQELVGTFIQQEVGK_	S(0.91)PPGS(0.09)ARPQELVGTFIQQEVGK	S(10.06)PPGS(-10.06)ARPQELVGT(-95.07)FIQQEVGK	1	3	802.4	0.5562	0.48975	0.48975	NaN	NaN	0.59854	0.59854	NaN	NaN	NaN
A2AIX1;E9QAT4	558;558	A2AIX1	A2AIX1		Sec16a;Sec16a	>tr|A2AIX1|A2AIX1_MOUSE Protein Sec16a OS=Mus musculus GN=Sec16a PE=4 SV=1;>tr|E9QAT4|E9QAT4_MOUSE Protein Sec16a OS=Mus musculus GN=Sec16a PE=4 SV=1	0.499998	0	0.482681	0	0.00798853	44.238	0.499998	0	2.94016e-13	133.16										1	S	VSSSYSSHSHRSPPGSARPQELVGTFIQQEV	X;X;X;X;X;X;X;X;X;X;X;X;X;X;X;X;X;X;X;X;X;X;X;X;X;X;X;X;X;X;X	XXXXXXXXXXXXXXXXXXXXXXXXXXXXXXX	2.94016e-13	133.16	133.16	_S(ph)PPGSARPQELVGTFIQQEVGK_	S(0.5)PPGS(0.5)ARPQELVGTFIQQEVGK	S(0)PPGS(0)ARPQELVGT(-51.85)FIQQEVGK	5	3	802.4	0.49625	0.47398	0.47398	NaN	NaN	0.6436	0.6436	NaN	NaN	NaN
A2AJI0;A8Y5P4;A2AJI0-2;A2AJI1;F6WF36	544;512;507;472;289	A2AJI0	A2AJI0	MAP7 domain-containing protein 1	Map7d1;Mtap7d1;Mtap7d1;Mtap7d1	>sp|A2AJI0|MA7D1_MOUSE MAP7 domain-containing protein 1 OS=Mus musculus GN=Map7d1 PE=1 SV=1;>tr|A8Y5P4|A8Y5P4_MOUSE Microtubule-associated protein 7 domain containing 1 OS=Mus musculus GN=Mtap7d1 PE=4 SV=1;>sp|A2AJI0-2|MA7D1_MOUSE Isoform 2 of MAP7 domain-	1	85.7717	1	73.3949	2.54051e-40	142.32	0.554698	0.954068	3.03038e-32	119.47	0.999953	43.3077	1.03302e-24	153.88	1	85.7717	4.32336e-40	139.75		1;2;3	S	RKSRAAEEKEPAAPASPAPSPVPSPTPAQPQ	X;X;X;X;X;X;X;X;X;X;X;X;X;X;X;Phospho (STY);X;X;X;Phospho (STY);X;X;X;Phospho (STY);X;Phospho (STY);X;X;X;X;X	XXXXPPPPPPPPPPPPPPPPPPPPPPPPPPP	2.54051e-40	153.88	104.07	_AAEEKEPAAPAS(ph)PAPS(ph)PVPS(ph)PTPAQPQK_	AAEEKEPAAPAS(1)PAPS(1)PVPS(0.586)PT(0.414)PAQPQK	AAEEKEPAAPAS(85.77)PAPS(49.51)PVPS(1.51)PT(-1.51)PAQPQK	12	3	997.438	0.55754	0.7069	0.7069	0.82456	0.7063	0.82883	0.82883	1.1554	0.80146	NaN
A2AJI0;A8Y5P4;A2AJI0-2;A2AJI1;F6WF36	548;516;511;476;293	A2AJI0	A2AJI0	MAP7 domain-containing protein 1	Map7d1;Mtap7d1;Mtap7d1;Mtap7d1	>sp|A2AJI0|MA7D1_MOUSE MAP7 domain-containing protein 1 OS=Mus musculus GN=Map7d1 PE=1 SV=1;>tr|A8Y5P4|A8Y5P4_MOUSE Microtubule-associated protein 7 domain containing 1 OS=Mus musculus GN=Mtap7d1 PE=4 SV=1;>sp|A2AJI0-2|MA7D1_MOUSE Isoform 2 of MAP7 domain-	0.999995	49.6306	0.999972	44.4052	5.18172e-77	181.83	0.966715	14.6307	1.51761e-31	115.96	0.990545	20.2998	6.33682e-47	152.66	0.999995	49.6306	1.39672e-31	119.28		1;2;3	S	AAEEKEPAAPASPAPSPVPSPTPAQPQKEQS	X;X;X;X;X;X;X;X;X;X;X;Phospho (STY);X;X;X;Phospho (STY);X;X;X;Phospho (STY);X;Phospho (STY);X;X;X;X;X;X;X;X;X	PPPPPPPPPPPPPPPPPPPPPPPPPPPPXXX	5.18172e-77	181.83	119.28	_AAEEKEPAAPAS(ph)PAPS(ph)PVPS(ph)PTPAQPQK_	AAEEKEPAAPAS(1)PAPS(1)PVPS(0.5)PT(0.5)PAQPQK	AAEEKEPAAPAS(80.72)PAPS(49.63)PVPS(0)PT(0)PAQPQK	16	3	997.438	0.072052	0.70829	0.70829	0.82456	0.7063	0.89386	0.89386	1.1554	0.80146	NaN
A2AJI0;A8Y5P4;A2AJI0-2;A2AJI1;F6WF36	552;520;515;480;297	A2AJI0	A2AJI0	MAP7 domain-containing protein 1	Map7d1;Mtap7d1;Mtap7d1;Mtap7d1	>sp|A2AJI0|MA7D1_MOUSE MAP7 domain-containing protein 1 OS=Mus musculus GN=Map7d1 PE=1 SV=1;>tr|A8Y5P4|A8Y5P4_MOUSE Microtubule-associated protein 7 domain containing 1 OS=Mus musculus GN=Mtap7d1 PE=4 SV=1;>sp|A2AJI0-2|MA7D1_MOUSE Isoform 2 of MAP7 domain-	0.58633	1.51483													0.58633	1.51483	1.39672e-31	119.28		3	S	KEPAAPASPAPSPVPSPTPAQPQKEQSSTQI	X;X;X;X;X;X;X;Phospho (STY);X;X;X;Phospho (STY);X;X;X;Phospho (STY);X;X;X;X;X;X;X;X;X;X;X;X;X;X;X	PPPPPPPPPPPPPPPPPPPPPPPPXXXXXXX	1.39672e-31	119.28	104.07	_AAEEKEPAAPAS(ph)PAPS(ph)PVPS(ph)PTPAQPQK_	AAEEKEPAAPAS(1)PAPS(1)PVPS(0.586)PT(0.414)PAQPQK	AAEEKEPAAPAS(85.77)PAPS(49.51)PVPS(1.51)PT(-1.51)PAQPQK	20	3	997.438	0.55754	0.57226	NaN	NaN	0.57226	0.52222	NaN	NaN	0.52222	NaN
A2AJI0;A8Y5P4	256;256	A2AJI0	A2AJI0	MAP7 domain-containing protein 1	Map7d1;Mtap7d1	>sp|A2AJI0|MA7D1_MOUSE MAP7 domain-containing protein 1 OS=Mus musculus GN=Map7d1 PE=1 SV=1;>tr|A8Y5P4|A8Y5P4_MOUSE Microtubule-associated protein 7 domain containing 1 OS=Mus musculus GN=Mtap7d1 PE=4 SV=1	1	64.42	0.999956	43.5668	7.44688e-05	133.32	1	64.42	7.40867e-05	145.29	0.999998	56.5486	0.0126978	104.59	0.9984	27.9513	0.010711	69.352		1	S	HSSPGRKTSGSRCSVSAVNLPKHVDSIINKR	X;Phospho (STY);Phospho (STY);X;X;X;X;X;X;X;X;X;X;X;X;Phospho (STY);X;X;X;X;X;X;X;X;X;X;X;X;X;X;X	XXXXXXXXXXXXPPPPPPPPPPXXXXXXXXX	7.75637e-05	145.29	142.97	_CSVS(ph)AVNLPK_	CSVS(1)AVNLPK	CS(-64.42)VS(64.42)AVNLPK	4	2	577.767	0.3118	1.1816	1.1816	NaN	NaN	1.5541	1.5541	NaN	NaN	NaN
A2AJI0;A8Y5P4;A2AJI0-2;A2AJI1;F6WF36	401;369;364;329;146	A2AJI0	A2AJI0	MAP7 domain-containing protein 1	Map7d1;Mtap7d1;Mtap7d1;Mtap7d1	>sp|A2AJI0|MA7D1_MOUSE MAP7 domain-containing protein 1 OS=Mus musculus GN=Map7d1 PE=1 SV=1;>tr|A8Y5P4|A8Y5P4_MOUSE Microtubule-associated protein 7 domain containing 1 OS=Mus musculus GN=Mtap7d1 PE=4 SV=1;>sp|A2AJI0-2|MA7D1_MOUSE Isoform 2 of MAP7 domain-	1	106.275	1	114.013	4.1645e-06	154.88	1	95.6617	1.10735e-06	147.07	1	101.528	1.54378e-06	142.32	1	106.275	3.79571e-06	153.94		1	S	PSGERPERRKPGAGGSPALARRRLEATPVQK	X;X;X;X;X;X;X;X;X;X;X;X;X;X;X;Phospho (STY);X;X;X;X;X;X;X;X;X;X;X;X;X;X;X	XXXXXXXXPPPPPPPPPPPPPXXXXXXXXXX	2.81737e-06	154.88	106.28	_RKPGAGGS(ph)PALAR_	RKPGAGGS(1)PALAR	RKPGAGGS(106.28)PALAR	8	2	659.343	0.11665	1.4235	1.4235	NaN	NaN	1.911	1.911	NaN	NaN	0.76081
A2AJI0;A8Y5P4;A2AJI0-2;A2AJI1;F6WF36	454;422;417;382;199	A2AJI0	A2AJI0	MAP7 domain-containing protein 1	Map7d1;Mtap7d1;Mtap7d1;Mtap7d1	>sp|A2AJI0|MA7D1_MOUSE MAP7 domain-containing protein 1 OS=Mus musculus GN=Map7d1 PE=1 SV=1;>tr|A8Y5P4|A8Y5P4_MOUSE Microtubule-associated protein 7 domain containing 1 OS=Mus musculus GN=Mtap7d1 PE=4 SV=1;>sp|A2AJI0-2|MA7D1_MOUSE Isoform 2 of MAP7 domain-	0.997452	26.0805	0.997452	26.0805	0.00158715	95.273	0.951868	13.4235	0.0450605	50.108	0.995509	24.3469	0.0380315	76.073	0.996227	24.9576	0.0133162	66.498		1	S	LKKRQSLPASIRPRLSTGSELSPKSKARPSS	X;X;X;X;X;Phospho (STY);X;X;X;X;X;X;X;X;X;Phospho (STY);X;X;X;X;X;X;X;X;X;X;X;X;X;Phospho (STY);Phospho (STY)	XXXXXXXXXXXXXXPPPPPPPPPPXXXXXXX	0.00158715	95.273	90.731	_LS(ph)TGSELSPK_	LS(0.997)T(0.002)GSELSPK	LS(26.08)T(-26.08)GS(-40.52)ELS(-76.04)PK	2	2	549.758	0.36953	0.45187	0.45187	NaN	NaN	0.59654	0.59654	NaN	NaN	1.2463
A2AJI0;A8Y5P4;A2AJI0-2;A2AJI1;F6WF36	483;451;446;411;228	A2AJI0	A2AJI0	MAP7 domain-containing protein 1	Map7d1;Mtap7d1;Mtap7d1;Mtap7d1	>sp|A2AJI0|MA7D1_MOUSE MAP7 domain-containing protein 1 OS=Mus musculus GN=Map7d1 PE=1 SV=1;>tr|A8Y5P4|A8Y5P4_MOUSE Microtubule-associated protein 7 domain containing 1 OS=Mus musculus GN=Mtap7d1 PE=4 SV=1;>sp|A2AJI0-2|MA7D1_MOUSE Isoform 2 of MAP7 domain-	0.987714	19.0733					0.808506	6.28562	2.70755e-07	93.753	0.897624	9.44505	0.0237875	38.756	0.987714	19.0733	1.16213e-05	76.118		1	S	SSPSTTWHRPASPCPSPGPGHALPPKPPSPR	Phospho (STY);Phospho (STY);X;Phospho (STY);Phospho (STY);X;X;X;X;X;X;X;X;X;X;Phospho (STY);X;X;X;X;X;X;X;X;X;X;X;X;X;X;X	XXXXXXXXXPPPPPPPPPPPPPPPPPPPPPP	2.70755e-07	93.753	76.118	_PASPCPS(ph)PGPGHALPPKPPSPR_	PAS(0.012)PCPS(0.988)PGPGHALPPKPPSPR	PAS(-19.07)PCPS(19.07)PGPGHALPPKPPS(-42.2)PR	7	3	761.036	-0.28759	0.58969	0.58969	NaN	NaN	0.75012	0.75012	NaN	NaN	NaN
A2AJI0;A8Y5P4;A2AJI0-2;A2AJI1;F6WF36	496;464;459;424;241	A2AJI0	A2AJI0	MAP7 domain-containing protein 1	Map7d1;Mtap7d1;Mtap7d1;Mtap7d1	>sp|A2AJI0|MA7D1_MOUSE MAP7 domain-containing protein 1 OS=Mus musculus GN=Map7d1 PE=1 SV=1;>tr|A8Y5P4|A8Y5P4_MOUSE Microtubule-associated protein 7 domain containing 1 OS=Mus musculus GN=Mtap7d1 PE=4 SV=1;>sp|A2AJI0-2|MA7D1_MOUSE Isoform 2 of MAP7 domain-	1	96.633	1	96.633	3.84129e-10	125.62	1	70.4107	5.01648e-10	125.18	1	76.3143	1.55284e-07	102.21	0.999998	57.3964	1.55284e-07	102.21		1;2	S	CPSPGPGHALPPKPPSPRGTTASPKGRVRRK	X;X;X;X;X;X;X;X;X;X;X;X;X;X;X;Phospho (STY);X;X;X;X;X;X;X;X;X;X;X;X;X;X;X	PPPPPPPPPPPPPPPPPPXXXXXXXXXXXXX	3.84129e-10	125.62	124.31	_PASPCPSPGPGHALPPKPPS(ph)PR_	PASPCPSPGPGHALPPKPPS(1)PR	PAS(-118)PCPS(-96.63)PGPGHALPPKPPS(96.63)PR	20	3	761.036	-0.067129	1.0409	1.0409	0.47159	NaN	1.0933	1.0933	0.45269	NaN	NaN
A2AJI0;A8Y5P4;A2AJI0-2;A2AJI1	78;78;78;78	A2AJI0	A2AJI0	MAP7 domain-containing protein 1	Map7d1;Mtap7d1;Mtap7d1	>sp|A2AJI0|MA7D1_MOUSE MAP7 domain-containing protein 1 OS=Mus musculus GN=Map7d1 PE=1 SV=1;>tr|A8Y5P4|A8Y5P4_MOUSE Microtubule-associated protein 7 domain containing 1 OS=Mus musculus GN=Mtap7d1 PE=4 SV=1;>sp|A2AJI0-2|MA7D1_MOUSE Isoform 2 of MAP7 domain-	0.984039	19.6896					0.735505	4.48621	0.0380181	45.941					0.984039	19.6896	1.06237e-05	66.282		1	S	PKQLPLEPGNPTGQISPQPAPPQEECPSSEA	X;X;X;X;X;X;X;X;X;X;X;X;X;X;X;Phospho (STY);X;X;X;X;X;X;X;X;X;X;X;X;X;X;X	XXPPPPPPPPPPPPPPPPPPPPPPPPPPPPP	1.06237e-05	66.282	51.586	_QLPLEPGNPTGQIS(ph)PQPAPPQEECPSSEAK_	QLPLEPGNPT(0.011)GQIS(0.984)PQPAPPQEECPS(0.003)S(0.003)EAK	QLPLEPGNPT(-19.69)GQIS(19.69)PQPAPPQEECPS(-25.86)S(-25.4)EAK	14	3	1088.5	0.14784	0.67646	0.67646	NaN	NaN	0.67215	0.67215	NaN	NaN	NaN
A2AJI0;A8Y5P4;A2AJI0-2;A2AJI1;F6WF36	444;412;407;372;189	A2AJI0	A2AJI0	MAP7 domain-containing protein 1	Map7d1;Mtap7d1;Mtap7d1;Mtap7d1	>sp|A2AJI0|MA7D1_MOUSE MAP7 domain-containing protein 1 OS=Mus musculus GN=Map7d1 PE=1 SV=1;>tr|A8Y5P4|A8Y5P4_MOUSE Microtubule-associated protein 7 domain containing 1 OS=Mus musculus GN=Mtap7d1 PE=4 SV=1;>sp|A2AJI0-2|MA7D1_MOUSE Isoform 2 of MAP7 domain-	0.999958	43.7719	0.999958	43.7719	0.000107344	128.08	0.973088	15.5821	0.0218407	61.235	0.998842	29.3565	0.0111728	74.611						1	S	EKSALARERNLKKRQSLPASIRPRLSTGSEL	X;X;X;X;X;X;X;X;X;X;X;X;X;X;X;Phospho (STY);X;X;X;X;X;X;X;X;X;Phospho (STY);X;X;Phospho (STY);X;X	XXXXXXXXXXXXXPPPPPPPPPXXXXXXXXX	0.000107344	128.08	102.97	_RQS(ph)LPASIR_	RQS(1)LPASIR	RQS(43.77)LPAS(-43.77)IR	3	2	554.287	0.25459	0.21461	0.21461	NaN	NaN	0.27932	0.27932	NaN	NaN	NaN
A2AJI0;A8Y5P4;A2AJI0-2;A2AJI1	114;114;114;114	A2AJI0	A2AJI0	MAP7 domain-containing protein 1	Map7d1;Mtap7d1;Mtap7d1	>sp|A2AJI0|MA7D1_MOUSE MAP7 domain-containing protein 1 OS=Mus musculus GN=Map7d1 PE=1 SV=1;>tr|A8Y5P4|A8Y5P4_MOUSE Microtubule-associated protein 7 domain containing 1 OS=Mus musculus GN=Mtap7d1 PE=4 SV=1;>sp|A2AJI0-2|MA7D1_MOUSE Isoform 2 of MAP7 domain-	0.564325	1.39219	0.564325	1.39219	3.88821e-05	104.21	0.482216	0	6.09298e-05	97.974	0.316178	0	0.00208867	63.337						1	S	TPTATGPREAKPSRRSSQPSPTTVPASDSPP	Phospho (STY);X;X;X;X;X;X;X;X;X;X;X;X;X;X;Phospho (STY);X;X;X;X;X;X;X;X;X;X;X;X;X;X;X	XXXXXXXXXXXXXXPPPPPPPPPPPPPPPPP	3.88821e-05	104.21	53.565	_RS(ph)SQPSPTTVPASDSPPAK_	RS(0.564)S(0.41)QPS(0.017)PT(0.005)T(0.005)VPASDSPPAK	RS(1.39)S(-1.39)QPS(-15.34)PT(-20.71)T(-20.71)VPAS(-48.01)DS(-48.01)PPAK	2	3	663.981	0.19195	0.44713	0.44713	NaN	NaN	0.63772	0.63772	NaN	NaN	NaN
A2AJI0;A8Y5P4;A2AJI0-2;A2AJI1	115;115;115;115	A2AJI0	A2AJI0	MAP7 domain-containing protein 1	Map7d1;Mtap7d1;Mtap7d1	>sp|A2AJI0|MA7D1_MOUSE MAP7 domain-containing protein 1 OS=Mus musculus GN=Map7d1 PE=1 SV=1;>tr|A8Y5P4|A8Y5P4_MOUSE Microtubule-associated protein 7 domain containing 1 OS=Mus musculus GN=Mtap7d1 PE=4 SV=1;>sp|A2AJI0-2|MA7D1_MOUSE Isoform 2 of MAP7 domain-	0.999519	38.6725	0.999519	38.6725	3.11409e-107	234.21	0.995574	23.5203	1.0566e-134	251.12	0.999137	31.0037	1.00213e-134	251.55	0.976635	16.3625	7.88458e-79	205.43		1	S	PTATGPREAKPSRRSSQPSPTTVPASDSPPA	X;X;X;X;X;X;X;X;X;X;X;X;X;X;X;Phospho (STY);X;X;X;X;X;X;X;X;X;X;X;X;X;X;X	XXXXXXXXXXXXXPPPPPPPPPPPPPPPPPP	1.00213e-134	251.55	217.86	_RSS(ph)QPSPTTVPASDSPPAK_	RSS(1)QPSPTTVPASDSPPAK	RS(-41.29)S(38.67)QPS(-38.67)PT(-38.67)T(-38.67)VPAS(-86.3)DS(-131.5)PPAK	3	2	995.467	0.25649	0.58877	0.58877	NaN	NaN	0.65136	0.65136	NaN	NaN	NaN
A2AJI0;A8Y5P4;A2AJI0-2;A2AJI1	118;118;118;118	A2AJI0	A2AJI0	MAP7 domain-containing protein 1	Map7d1;Mtap7d1;Mtap7d1	>sp|A2AJI0|MA7D1_MOUSE MAP7 domain-containing protein 1 OS=Mus musculus GN=Map7d1 PE=1 SV=1;>tr|A8Y5P4|A8Y5P4_MOUSE Microtubule-associated protein 7 domain containing 1 OS=Mus musculus GN=Mtap7d1 PE=4 SV=1;>sp|A2AJI0-2|MA7D1_MOUSE Isoform 2 of MAP7 domain-	0.712243	5.45991	0.441471	0	0.000672323	74.428					0.595335	4.97841	9.4271e-79	204.12	0.712243	5.45991	0.000172067	86.005		1	S	TGPREAKPSRRSSQPSPTTVPASDSPPAKQD	X;X;X;X;X;X;X;X;X;X;X;X;X;X;X;Phospho (STY);X;X;X;X;X;X;X;X;X;X;X;X;X;X;X	XXXXXXXXXXPPPPPPPPPPPPPPPPPPPXX	9.4271e-79	204.12	86.005	_RSSQPS(ph)PTTVPASDSPPAK_	RS(0.037)S(0.203)QPS(0.712)PT(0.037)T(0.011)VPASDSPPAK	RS(-12.84)S(-5.46)QPS(5.46)PT(-12.84)T(-18.1)VPAS(-72.97)DS(-72.17)PPAK	6	3	663.981	0.18005	1.3249	1.3249	NaN	NaN	1.3385	1.3385	NaN	NaN	NaN
A2AJI0;A8Y5P4	275;275	A2AJI0	A2AJI0	MAP7 domain-containing protein 1	Map7d1;Mtap7d1	>sp|A2AJI0|MA7D1_MOUSE MAP7 domain-containing protein 1 OS=Mus musculus GN=Map7d1 PE=1 SV=1;>tr|A8Y5P4|A8Y5P4_MOUSE Microtubule-associated protein 7 domain containing 1 OS=Mus musculus GN=Mtap7d1 PE=4 SV=1	0.81575	6.46221	0.800255	6.02757	0.000327254	116.58	0.81575	6.46221	6.36359e-15	194.59	0.499872	0	0.000680492	104.41	0.815065	6.44859	1.86213e-06	177.38		1	S	LPKHVDSIINKRLSKSSATLWNSPSRNRSLQ	X;X;X;X;X;X;X;X;X;X;X;X;X;X;X;Phospho (STY);X;X;X;X;X;X;X;X;X;X;X;X;X;X;X	XXXXXXXXXXXXXXXPPPPPPPPPPPXXXXX	6.36359e-15	194.59	194.59	_S(ph)SATLWNSPSR_	S(0.816)S(0.184)ATLWNSPSR	S(6.46)S(-6.46)AT(-44.33)LWNS(-158.02)PS(-174.36)R	1	2	643.282	0.046742	2.1786	2.1786	NaN	NaN	2.8633	2.8633	NaN	NaN	NaN
A2AJI0;A8Y5P4	276;276	A2AJI0	A2AJI0	MAP7 domain-containing protein 1	Map7d1;Mtap7d1	>sp|A2AJI0|MA7D1_MOUSE MAP7 domain-containing protein 1 OS=Mus musculus GN=Map7d1 PE=1 SV=1;>tr|A8Y5P4|A8Y5P4_MOUSE Microtubule-associated protein 7 domain containing 1 OS=Mus musculus GN=Mtap7d1 PE=4 SV=1	0.5	0	0.499648	0	0.00289957	85.45	0.5	0	6.17825e-05	170.95	0.499872	0	0.000680492	104.41	0.499999	0	1.86213e-06	177.38		1	S	PKHVDSIINKRLSKSSATLWNSPSRNRSLQL	X;X;X;X;X;X;X;X;X;X;X;X;X;X;X;X;X;X;X;X;X;X;X;X;X;X;X;X;X;X;X	XXXXXXXXXXXXXXXXXXXXXXXXXXXXXXX	1.86213e-06	177.38	170.95	_S(ph)SATLWNSPSR_	S(0.5)S(0.5)ATLWNSPSR	S(0)S(0)AT(-58.87)LWNS(-159.16)PS(-167.53)R	2	2	643.282	0.095605	1.0274	1.0274	NaN	NaN	1.133	1.133	NaN	NaN	NaN
A2AJI0;A8Y5P4;A2AJI0-2;F6WF36	242;242;242;24	A2AJI0	A2AJI0	MAP7 domain-containing protein 1	Map7d1;Mtap7d1;Mtap7d1	>sp|A2AJI0|MA7D1_MOUSE MAP7 domain-containing protein 1 OS=Mus musculus GN=Map7d1 PE=1 SV=1;>tr|A8Y5P4|A8Y5P4_MOUSE Microtubule-associated protein 7 domain containing 1 OS=Mus musculus GN=Mtap7d1 PE=4 SV=1;>sp|A2AJI0-2|MA7D1_MOUSE Isoform 2 of MAP7 domain-	0.619381	2.11467	0.499896	0	0.0120252	58.674	0.619381	2.11467	0.00165503	77.593	0.499987	0	0.0220356	52.071	0.588208	1.54856	0.00744686	62.924		1	S	EIRQQRWSWAGALHHSSPGRKTSGSRCSVSA	X;X;X;X;X;X;X;X;X;X;X;X;X;X;X;Phospho (STY);X;X;X;X;X;X;X;X;X;X;X;X;X;Phospho (STY);X	XXXXXXPPPPPPPPPPPPPPXXXXXXXXXXX	0.00165503	77.593	77.593	_WSWAGALHHS(ph)SPGR_	WSWAGALHHS(0.619)S(0.381)PGR	WS(-68.22)WAGALHHS(2.11)S(-2.11)PGR	10	3	543.575	0.074653	0.94542	0.94542	NaN	NaN	1.0215	1.0215	NaN	NaN	NaN
A2AJI0;A8Y5P4;A2AJI0-2;F6WF36	243;243;243;25	A2AJI0	A2AJI0	MAP7 domain-containing protein 1	Map7d1;Mtap7d1;Mtap7d1	>sp|A2AJI0|MA7D1_MOUSE MAP7 domain-containing protein 1 OS=Mus musculus GN=Map7d1 PE=1 SV=1;>tr|A8Y5P4|A8Y5P4_MOUSE Microtubule-associated protein 7 domain containing 1 OS=Mus musculus GN=Mtap7d1 PE=4 SV=1;>sp|A2AJI0-2|MA7D1_MOUSE Isoform 2 of MAP7 domain-	0.953222	13.0924	0.953222	13.0924	0.0112959	59.155	0.86631	8.12482	0.00286214	71.176	0.499987	0	0.0220356	52.071	0.499988	0	0.0133479	57.802		1	S	IRQQRWSWAGALHHSSPGRKTSGSRCSVSAV	X;X;X;X;X;X;X;X;X;X;X;X;X;X;X;Phospho (STY);X;X;X;X;X;X;X;X;X;X;X;X;Phospho (STY);X;X	XXXXXPPPPPPPPPPPPPPXXXXXXXXXXXX	0.00286214	71.176	59.155	_WSWAGALHHSS(ph)PGR_	WSWAGALHHS(0.047)S(0.953)PGR	WS(-50.33)WAGALHHS(-13.09)S(13.09)PGR	11	3	543.575	-0.12017	0.9487	0.9487	NaN	NaN	1.1849	1.1849	NaN	NaN	NaN
A2AJT5;A2AJT4;A2AJT3	211;211;211	A2AJT5	A2AJT5	Arginine/serine-rich protein PNISR	Sfrs18;Pnisr;Sfrs18	>tr|A2AJT5|A2AJT5_MOUSE Protein Sfrs18 OS=Mus musculus GN=Sfrs18 PE=4 SV=1;>sp|A2AJT4|PNISR_MOUSE Arginine/serine-rich protein PNISR OS=Mus musculus GN=Pnisr PE=1 SV=1;>tr|A2AJT3|A2AJT3_MOUSE MCG2929, isoform CRA_a OS=Mus musculus GN=Sfrs18 PE=4 SV=1	1	72.4847	1	66.19	3.41665e-05	153.74	1	61.3533	7.2645e-05	130.1	1	68.657	5.73225e-05	149.49	1	72.4847	8.05488e-05	138.63		1	S	QNRRERPPSFRDRQRSPIALPVKQEPPQIDA	X;X;X;X;X;X;X;X;X;X;X;X;X;X;X;Phospho (STY);X;X;X;X;X;X;X;X;X;X;X;X;X;X;X	XXXXXXXXXXXXXPPPPPPPPPPXXXXXXXX	3.41665e-05	153.74	72.485	_S(ph)PIALPVK_	S(1)PIALPVK	S(72.48)PIALPVK	1	2	452.749	0.13787	0.70505	0.70505	NaN	NaN	0.97645	0.97645	NaN	NaN	NaN
Q8K2F0-2;Q8K2F0;A2AKA9	262;262;262	Q8K2F0-2	Q8K2F0-2	Bromodomain-containing protein 3	Brd3;Brd3	>sp|Q8K2F0-2|BRD3_MOUSE Isoform 2 of Bromodomain-containing protein 3 OS=Mus musculus GN=Brd3;>sp|Q8K2F0|BRD3_MOUSE Bromodomain-containing protein 3 OS=Mus musculus GN=Brd3 PE=1 SV=2;>tr|A2AKA9|A2AKA9_MOUSE Bromodomain containing 3 (Fragment) OS=Mus muscul	0.999985	48.7609	0.999814	37.3161	0.000942537	116.19	0.999985	48.7609	0.000529184	120.84	0.999508	33.7272	0.00231454	90.861	0.999563	33.5965	0.000173147	131.06		1	S	TTTPTTSAITASRSESPPPLSEPKQAKVVAR	X;X;X;X;X;X;X;X;X;X;X;X;X;X;X;Phospho (STY);X;X;X;X;X;X;X;X;X;X;X;X;X;X;X	XXXXXXXXXXXXXPPPPPPPPPPPXXXXXXX	0.000173147	131.06	110.92	_SES(ph)PPPLSEPK_	SES(1)PPPLSEPK	S(-48.76)ES(48.76)PPPLS(-58.85)EPK	3	2	624.281	-1.1405	0.91933	0.91933	NaN	NaN	1.1897	1.1897	NaN	NaN	NaN
A2AKB9;A2AKB9-2;A2AKB9-4	50;50;50	A2AKB9	A2AKB9	DDB1- and CUL4-associated factor 10	Dcaf10	>sp|A2AKB9|DCA10_MOUSE DDB1- and CUL4-associated factor 10 OS=Mus musculus GN=Dcaf10 PE=2 SV=1;>sp|A2AKB9-2|DCA10_MOUSE Isoform 2 of DDB1- and CUL4-associated factor 10 OS=Mus musculus GN=Dcaf10;>sp|A2AKB9-4|DCA10_MOUSE Isoform 4 of DDB1- and CUL4-associat	1	65.7161									1	65.7161	0.00033138	98.227						1	S	PAPRPASPQRGADAASPPPVAGSPRLPGGPA	X;X;X;X;X;X;X;X;X;X;X;X;X;X;X;Phospho (STY);X;X;X;X;X;X;X;X;X;X;X;X;X;X;X	XXXXXXXXXXPPPPPPPPPPPPPPPXXXXXX	0.00033138	98.227	98.227	_GADAAS(ph)PPPVAGSPR_	GADAAS(1)PPPVAGSPR	GADAAS(65.72)PPPVAGS(-65.72)PR	6	2	715.327	1.2127	0.92728	0.92728	NaN	NaN	0.96087	0.96087	NaN	NaN	NaN
A2AKD7;Q61234	183;183	A2AKD7	A2AKD7	Alpha-1-syntrophin	Snta1;Snta1	>tr|A2AKD7|A2AKD7_MOUSE Alpha-1-syntrophin OS=Mus musculus GN=Snta1 PE=4 SV=1;>sp|Q61234|SNTA1_MOUSE Alpha-1-syntrophin OS=Mus musculus GN=Snta1 PE=1 SV=1	1	68.9482	0.999999	63.8341	9.23395e-12	135.66	0.999999	59.2639	1.33746e-62	183.99	0.999999	58.7762	8.93946e-51	179.17	1	68.9482	3.86475e-40	166.01		1;2	S	PYFKNSAGGTSVGWDSPPASPLQRQPSSPGP	X;X;X;X;X;X;X;X;X;X;X;X;X;X;X;Phospho (STY);X;X;X;Phospho (STY);X;X;X;X;X;X;Phospho (STY);Phospho (STY);X;X;X	XXXXPPPPPPPPPPPPPPPPPPPPXXXXXXX	1.33746e-62	183.99	166.01	_NSAGGTSVGWDS(ph)PPASPLQR_	NSAGGTSVGWDS(1)PPASPLQR	NS(-74.12)AGGT(-79.25)S(-68.95)VGWDS(68.95)PPAS(-80.99)PLQR	12	2	1032.46	0.49089	0.6262	0.6262	0.65731	NaN	0.62419	0.62419	0.76232	NaN	NaN
A2AKD7;Q61234	187;187	A2AKD7	A2AKD7	Alpha-1-syntrophin	Snta1;Snta1	>tr|A2AKD7|A2AKD7_MOUSE Alpha-1-syntrophin OS=Mus musculus GN=Snta1 PE=4 SV=1;>sp|Q61234|SNTA1_MOUSE Alpha-1-syntrophin OS=Mus musculus GN=Snta1 PE=1 SV=1	1	77.3573	1	77.3573	0.0162742	103.88					1	75.0284	1.64687e-07	156.08						2	S	NSAGGTSVGWDSPPASPLQRQPSSPGPQPRN	X;X;X;X;X;X;X;X;X;X;X;Phospho (STY);X;X;X;Phospho (STY);X;X;X;X;X;X;Phospho (STY);Phospho (STY);X;X;X;X;X;X;X	PPPPPPPPPPPPPPPPPPPPXXXXXXXXXXX	1.64687e-07	156.08	103.88	_NSAGGTSVGWDS(ph)PPAS(ph)PLQR_	NSAGGTSVGWDS(1)PPAS(1)PLQR	NS(-72.1)AGGT(-72.51)S(-63.83)VGWDS(63.83)PPAS(77.36)PLQR	16	2	1072.45	0.89763	0.65731	NaN	0.65731	NaN	0.76232	NaN	0.76232	NaN	NaN
Q8BG05;A2AL12	14;14	Q8BG05	Q8BG05	Heterogeneous nuclear ribonucleoprotein A3	Hnrnpa3;Hnrnpa3	>sp|Q8BG05|ROA3_MOUSE Heterogeneous nuclear ribonucleoprotein A3 OS=Mus musculus GN=Hnrnpa3 PE=1 SV=1;>tr|A2AL12|A2AL12_MOUSE Heterogeneous nuclear ribonucleoprotein A3 OS=Mus musculus GN=Hnrnpa3 PE=4 SV=1	1	32.6266	1	32.6266	0.0398579	98.175					1	47.5317	0.00666399	47.532	1	41.5131	0.0768777	47.68		1	S	__MEVKPPPGRPQPDSGRRRRRRGEEGHDPK	X;X;Oxidation (M);X;X;X;X;X;X;X;X;X;X;X;X;Phospho (STY);X;X;X;X;X;X;X;X;X;X;X;X;X;X;X	XXPPPPPPPPPPPPPPPPXXXXXXXXXXXXX	0.0017846	98.175	32.627	_(ac)M(ox)EVKPPPGRPQPDS(ph)GR_	MEVKPPPGRPQPDS(1)GR	MEVKPPPGRPQPDS(32.63)GR	14	3	629.292	0.24347	0.44036	0.44036	NaN	NaN	0.54724	0.54724	NaN	NaN	1.0376
A2AL50;Q8C0I1;A2AL49	78;52;78	A2AL50	A2AL50	Alkyldihydroxyacetonephosphate synthase, peroxisomal	Agps;Agps;Agps	>tr|A2AL50|A2AL50_MOUSE Alkyldihydroxyacetonephosphate synthase, peroxisomal OS=Mus musculus GN=Agps PE=4 SV=1;>sp|Q8C0I1|ADAS_MOUSE Alkyldihydroxyacetonephosphate synthase, peroxisomal OS=Mus musculus GN=Agps PE=1 SV=1;>tr|A2AL49|A2AL49_MOUSE Alkyldihydro	1	73.3054	0.999992	51.0646	2.01507e-36	162.01	1	65.0312	6.02439e-20	169.41	1	73.3054	6.56138e-88	197.37	0.999988	49.3325	7.7922e-20	168.65		1	S	QEAPSTNECKARRAASAAGASPAATPAAPES	X;X;X;X;X;X;X;X;X;X;X;X;X;X;X;Phospho (STY);X;X;X;X;X;X;X;X;X;X;X;X;X;X;X	XXXXXXXXXXXXPPPPPPPPPPPPPPPPPPP	6.56138e-88	197.37	186.62	_AAS(ph)AAGASPAATPAAPESGTIPK_	AAS(1)AAGASPAATPAAPESGTIPK	AAS(73.31)AAGAS(-73.31)PAAT(-121.77)PAAPES(-166.5)GT(-170.56)IPK	3	2	1037.5	-0.11326	0.87044	0.87044	NaN	NaN	1.0754	1.0754	NaN	NaN	0.91706
A2AL50;Q8C0I1;A2AL49	83;57;83	A2AL50	A2AL50	Alkyldihydroxyacetonephosphate synthase, peroxisomal	Agps;Agps;Agps	>tr|A2AL50|A2AL50_MOUSE Alkyldihydroxyacetonephosphate synthase, peroxisomal OS=Mus musculus GN=Agps PE=4 SV=1;>sp|Q8C0I1|ADAS_MOUSE Alkyldihydroxyacetonephosphate synthase, peroxisomal OS=Mus musculus GN=Agps PE=1 SV=1;>tr|A2AL49|A2AL49_MOUSE Alkyldihydro	1	67.0918	1	67.0918	1.67551e-164	246.59	0.999983	48.8829	3.46574e-89	202.44	0.999949	42.9363	4.09005e-106	242.09	0.999997	56.0604	1.08724e-254	296.55		1	S	TNECKARRAASAAGASPAATPAAPESGTIPK	X;X;X;X;X;X;X;X;X;X;X;X;X;X;X;Phospho (STY);X;X;X;X;X;X;X;X;X;X;X;X;X;X;X	XXXXXXXPPPPPPPPPPPPPPPPPPPPPPPP	1.08724e-254	296.55	246.59	_AASAAGAS(ph)PAATPAAPESGTIPK_	AASAAGAS(1)PAATPAAPESGTIPK	AAS(-67.09)AAGAS(67.09)PAAT(-90.98)PAAPES(-178.69)GT(-178.69)IPK	8	2	1037.5	0.085297	0.80417	0.80417	NaN	NaN	0.91798	0.91798	NaN	NaN	0.91706
A7TU71;A2ALU4	318;318	A7TU71	A7TU71	Protein Shroom2	Shroom2;Shroom2	>tr|A7TU71|A7TU71_MOUSE Protein Shroom2 OS=Mus musculus GN=Shroom2 PE=2 SV=1;>sp|A2ALU4|SHRM2_MOUSE Protein Shroom2 OS=Mus musculus GN=Shroom2 PE=1 SV=1	1	115.557	1	95.4173	5.57259e-06	127.79	1	107.088	3.9365e-06	136.3	1	62.3773	8.23311e-05	118.87	1	115.557	1.62846e-05	117.7		1	S	NFGPVWYVPDKKKAPSPPPLGLPLRSDSFSV	X;X;X;X;X;X;X;X;X;X;X;X;X;X;X;Phospho (STY);X;X;X;X;X;X;X;X;X;X;X;X;X;X;X	XXXXXXXXXXXXPPPPPPPPPPPPPXXXXXX	3.9365e-06	136.3	115.56	_KAPS(ph)PPPLGLPLR_	KAPS(1)PPPLGLPLR	KAPS(115.56)PPPLGLPLR	4	2	711.897	0.044572	0.32741	0.32741	NaN	NaN	0.44092	0.44092	NaN	NaN	NaN
A7TU71;A2ALU4;A2ALU4-2	1159;1153;118	A7TU71	A7TU71	Protein Shroom2	Shroom2;Shroom2	>tr|A7TU71|A7TU71_MOUSE Protein Shroom2 OS=Mus musculus GN=Shroom2 PE=2 SV=1;>sp|A2ALU4|SHRM2_MOUSE Protein Shroom2 OS=Mus musculus GN=Shroom2 PE=1 SV=1;>sp|A2ALU4-2|SHRM2_MOUSE Isoform 2 of Protein Shroom2 OS=Mus musculus GN=Shroom2	0.9427	12.1622	0.850219	7.54075	0.00158452	70.529	0.88813	8.99765	0.000371585	82.908	0.9427	12.1622	0.00422315	61.87	0.831115	6.9207	0.00250128	67.449		1	S	VEAPHRARPPEPRPPSTPAPPVRDSCSSPPS	X;X;X;X;X;X;X;X;X;X;X;X;X;X;X;Phospho (STY);X;X;X;X;X;X;X;X;X;X;X;X;X;X;X	XXXXXXPPPPPPPPPPPPPPPPPXXXXXXXX	0.000371585	82.908	61.87	_ARPPEPRPPS(ph)TPAPPVR_	ARPPEPRPPS(0.943)T(0.057)PAPPVR	ARPPEPRPPS(12.16)T(-12.16)PAPPVR	10	3	634.663	0.095093	1.0993	1.0993	NaN	NaN	1.0533	1.0533	NaN	NaN	NaN
A2AM05;A2AM05-4;A2AM05-3	1324;1323;189	A2AM05	A2AM05	Centlein	Cntln	>sp|A2AM05|CNTLN_MOUSE Centlein OS=Mus musculus GN=Cntln PE=1 SV=1;>sp|A2AM05-4|CNTLN_MOUSE Isoform 4 of Centlein OS=Mus musculus GN=Cntln;>sp|A2AM05-3|CNTLN_MOUSE Isoform 3 of Centlein OS=Mus musculus GN=Cntln	1	75.2148					0.999881	39.2378	0.000691488	94.922					1	75.2148	0.000249224	112.16		1	S	STHKAQTLAASILNISRSDLEEILDTEDELE	X;X;X;X;X;X;X;X;X;X;X;X;X;X;X;Phospho (STY);X;X;X;X;X;X;X;X;X;X;X;X;X;X;X	XXXXPPPPPPPPPPPPPXXXXXXXXXXXXXX	0.000249224	112.16	112.16	_AQTLAASILNIS(ph)R_	AQTLAASILNIS(1)R	AQT(-107.03)LAAS(-75.21)ILNIS(75.21)R	12	2	719.377	-0.21323	0.4519	0.4519	NaN	NaN	0.53282	0.53282	NaN	NaN	NaN
Q9R207;A2AMG5	398;398	Q9R207	Q9R207	Nibrin	Nbn;Nbn	>sp|Q9R207|NBN_MOUSE Nibrin OS=Mus musculus GN=Nbn PE=1 SV=1;>tr|A2AMG5|A2AMG5_MOUSE Nibrin (Fragment) OS=Mus musculus GN=Nbn PE=4 SV=1	1	67.0537	1	66.1413	9.4906e-06	164.48	0.999999	62.21	0.000340519	166.62	0.999998	57.5742	7.55673e-08	178.15	1	67.0537	1.13349e-05	162.48		1	S	EEVKIPGLEQSSRKLSQETFNIKEAPKPSSK	X;X;X;X;X;X;X;X;X;X;X;X;X;X;X;Phospho (STY);X;X;X;X;X;X;X;X;X;X;X;X;X;X;X	XXXXXXXXXXXXXPPPPPPPPPPXXXXXXXX	7.55673e-08	178.15	162.48	_KLS(ph)QETFNIK_	KLS(1)QETFNIK	KLS(67.05)QET(-67.05)FNIK	3	2	644.321	-0.25005	1.1806	1.1806	NaN	NaN	1.2537	1.2537	NaN	NaN	NaN
Q80XI3-3;A2AMI2;Q80XI3;Q80XI3-4;Q80XI3-2;A2AMI6	481;470;470;488;470;480	Q80XI3-3	Q80XI3-3	Eukaryotic translation initiation factor 4 gamma 3	Eif4g3;Eif4g3;Eif4g3	>sp|Q80XI3-3|IF4G3_MOUSE Isoform 3 of Eukaryotic translation initiation factor 4 gamma 3 OS=Mus musculus GN=Eif4g3;>tr|A2AMI2|A2AMI2_MOUSE Eukaryotic translation initiation factor 4 gamma 3 OS=Mus musculus GN=Eif4g3 PE=4 SV=1;>sp|Q80XI3|IF4G3_MOUSE Eukaryo	0.999728	35.6508									0.999728	35.6508	8.65e-07	98.299						1;2	S	TCLSKDAKEMQDKAESESDGQAEETADPQSL	X;X;X;X;X;X;X;X;X;X;X;X;X;X;X;Phospho (STY);X;Phospho (STY);X;X;X;X;X;X;X;X;X;X;X;X;X	XXXXXXXXXXXXXPPPPPPPPPPPPPPPPPP	8.65e-07	98.299	98.299	_AES(ph)ES(ph)DGQAEETADPQSLHSGR_	AES(1)ES(0.999)DGQAEET(0.002)ADPQSLHSGR	AES(35.65)ES(29.04)DGQAEET(-29.04)ADPQS(-75.36)LHS(-81.15)GR	3	3	820.978	-0.0045064	0.42697	0.42697	0.52713	NaN	0.4382	0.4382	0.54789	NaN	NaN
Q80XI3-3;A2AMI2;Q80XI3;Q80XI3-4;Q80XI3-2;A2AMI6	483;472;472;490;472;482	Q80XI3-3	Q80XI3-3	Eukaryotic translation initiation factor 4 gamma 3	Eif4g3;Eif4g3;Eif4g3	>sp|Q80XI3-3|IF4G3_MOUSE Isoform 3 of Eukaryotic translation initiation factor 4 gamma 3 OS=Mus musculus GN=Eif4g3;>tr|A2AMI2|A2AMI2_MOUSE Eukaryotic translation initiation factor 4 gamma 3 OS=Mus musculus GN=Eif4g3 PE=4 SV=1;>sp|Q80XI3|IF4G3_MOUSE Eukaryo	0.998755	29.0434									0.998755	29.0434	8.65e-07	98.299						2	S	LSKDAKEMQDKAESESDGQAEETADPQSLHS	X;X;X;X;X;X;X;X;X;X;X;X;X;Phospho (STY);X;Phospho (STY);X;X;X;X;X;X;X;X;X;X;X;X;X;X;X	XXXXXXXXXXXPPPPPPPPPPPPPPPPPPPP	8.65e-07	98.299	98.299	_AES(ph)ES(ph)DGQAEETADPQSLHSGR_	AES(1)ES(0.999)DGQAEET(0.002)ADPQSLHSGR	AES(35.65)ES(29.04)DGQAEET(-29.04)ADPQS(-75.36)LHS(-81.15)GR	5	3	820.978	-0.0045064	0.52713	NaN	0.52713	NaN	0.54789	NaN	0.54789	NaN	NaN
Q80XI3-3;A2AMI2;Q80XI3;Q80XI3-4;Q80XI3-2;A2AMI7	1161;1150;1150;1149;1131;573	Q80XI3-3	Q80XI3-3	Eukaryotic translation initiation factor 4 gamma 3	Eif4g3;Eif4g3;Eif4g3	>sp|Q80XI3-3|IF4G3_MOUSE Isoform 3 of Eukaryotic translation initiation factor 4 gamma 3 OS=Mus musculus GN=Eif4g3;>tr|A2AMI2|A2AMI2_MOUSE Eukaryotic translation initiation factor 4 gamma 3 OS=Mus musculus GN=Eif4g3 PE=4 SV=1;>sp|Q80XI3|IF4G3_MOUSE Eukaryo	0.87067	8.28156	0.87067	8.28156	0.000179405	104.95														1	S	PIPAGTARPNTFLRGSSKDLLDNQSQEEQRR	X;X;X;X;X;X;X;X;X;X;X;X;X;X;X;Phospho (STY);X;X;X;X;X;X;X;X;X;X;X;X;X;X;X	XXXXXXXXXXXXXXPPPPPPPPPPPPPPPPX	0.000179405	104.95	104.95	_GS(ph)SKDLLDNQSQEEQR_	GS(0.871)S(0.129)KDLLDNQSQEEQR	GS(8.28)S(-8.28)KDLLDNQS(-72.8)QEEQR	2	3	638.613	0.38834	1.8917	1.8917	NaN	NaN	2.5625	2.5625	NaN	NaN	NaN
Q80XI3-3;A2AMI2;Q80XI3;Q80XI3-4;Q80XI3-2;A2AMI6	278;267;267;285;267;277	Q80XI3-3	Q80XI3-3	Eukaryotic translation initiation factor 4 gamma 3	Eif4g3;Eif4g3;Eif4g3	>sp|Q80XI3-3|IF4G3_MOUSE Isoform 3 of Eukaryotic translation initiation factor 4 gamma 3 OS=Mus musculus GN=Eif4g3;>tr|A2AMI2|A2AMI2_MOUSE Eukaryotic translation initiation factor 4 gamma 3 OS=Mus musculus GN=Eif4g3 PE=4 SV=1;>sp|Q80XI3|IF4G3_MOUSE Eukaryo	0.998059	30.7967	0.998059	30.7967	0.0012609	83.045	0.973856	18.7243	5.76749e-05	110.66	0.936559	14.7059	0.000183739	99.752	0.979551	20.0501	0.000893311	86.313		1	S	ETAAGEPTPEPPRTSSPTSLPPLARSSLPSP	X;X;X;X;X;X;X;X;X;X;X;X;X;X;X;Phospho (STY);X;X;X;X;X;X;X;X;X;X;X;X;X;X;X	XXXXXXXXXXXXXPPPPPPPPPPPPXXXXXX	5.76749e-05	110.66	80.245	_TSS(ph)PTSLPPLAR_	T(0.001)S(0.001)S(0.998)PTSLPPLAR	T(-30.8)S(-30.8)S(30.8)PT(-36.64)S(-42.01)LPPLAR	3	2	653.824	0.2465	2.1656	2.1656	NaN	NaN	2.6095	2.6095	NaN	NaN	NaN
F6VQ19;Q3UMG5;Q3UMG5-3;Q3UMG5-2;F7AAC3;A2AMP0	366;355;355;355;68;51	F6VQ19	F6VQ19	Leucine-rich repeat and calponin homology domain-containing protein 2	Lrch2;Lrch2;Lrch2;Lrch2	>tr|F6VQ19|F6VQ19_MOUSE Leucine-rich repeat and calponin homology domain-containing protein 2 (Fragment) OS=Mus musculus GN=Lrch2 PE=4 SV=1;>sp|Q3UMG5|LRCH2_MOUSE Leucine-rich repeat and calponin homology domain-containing protein 2 OS=Mus musculus GN=Lrch	0.949885	12.777	0.949885	12.777	0.0113286	58.693					0.59401	1.65278	0.000603343	92.307	0.5	0	0.00029856	101.5		1	S	DSMEDFYPNKNHGPDSGIGSDNGEKRLSTTE	X;X;X;X;X;X;X;X;X;X;X;X;X;X;X;Phospho (STY);X;X;X;X;X;X;X;X;X;X;X;X;X;X;X	XXXXXXXXXXPPPPPPPPPPPPPPPXXXXXX	0.00029856	101.5	58.693	_NHGPDS(ph)GIGSDNGEK_	NHGPDS(0.95)GIGS(0.05)DNGEK	NHGPDS(12.78)GIGS(-12.78)DNGEK	6	2	782.307	0.22624	1.8487	1.8487	NaN	NaN	2.5324	2.5324	NaN	NaN	NaN
F6VQ19;Q3UMG5;Q3UMG5-3;Q3UMG5-2;F7AAC3;A2AMP0	370;359;359;359;72;55	F6VQ19	F6VQ19	Leucine-rich repeat and calponin homology domain-containing protein 2	Lrch2;Lrch2;Lrch2;Lrch2	>tr|F6VQ19|F6VQ19_MOUSE Leucine-rich repeat and calponin homology domain-containing protein 2 (Fragment) OS=Mus musculus GN=Lrch2 PE=4 SV=1;>sp|Q3UMG5|LRCH2_MOUSE Leucine-rich repeat and calponin homology domain-containing protein 2 OS=Mus musculus GN=Lrch	0.999866	38.7247	0.999671	34.8247	0.000297009	101.92	0.987974	19.1464	0.00116421	83.404	0.998932	29.7096	0.00552094	65.924	0.999866	38.7247	5.87536e-06	142.94		1	S	DFYPNKNHGPDSGIGSDNGEKRLSTTEPSDD	X;X;X;X;X;X;X;X;X;X;X;X;X;X;X;Phospho (STY);X;X;X;X;X;X;X;X;X;X;X;X;X;X;X	XXXXXXPPPPPPPPPPPPPPPXXXXXXXXXX	5.87536e-06	142.94	45.207	_NHGPDSGIGS(ph)DNGEK_	NHGPDSGIGS(1)DNGEK	NHGPDS(-38.72)GIGS(38.72)DNGEK	10	3	521.874	-0.84587	0.92965	0.92965	NaN	NaN	0.98664	0.98664	NaN	NaN	NaN
A2AN08;A2AN08-3;A2AN08-5	619;619;619	A2AN08	A2AN08	E3 ubiquitin-protein ligase UBR4	Ubr4	>sp|A2AN08|UBR4_MOUSE E3 ubiquitin-protein ligase UBR4 OS=Mus musculus GN=Ubr4 PE=1 SV=1;>sp|A2AN08-3|UBR4_MOUSE Isoform 3 of E3 ubiquitin-protein ligase UBR4 OS=Mus musculus GN=Ubr4;>sp|A2AN08-5|UBR4_MOUSE Isoform 5 of E3 ubiquitin-protein ligase UBR4 OS=	0.914983	10.3191	0.820462	6.59903	5.56154e-23	158.52	0.914983	10.3191	1.91018e-31	168.89	0.869647	8.24221	2.25748e-31	167.89	0.865069	8.06938	3.33394e-23	161.08		1	S	EKAAPPPPPPPPPLESSPRVKSPNKQASGEK	X;X;X;X;X;X;X;X;X;X;X;X;X;X;X;Phospho (STY);X;X;X;X;X;X;X;X;X;X;X;X;X;X;X	XXPPPPPPPPPPPPPPPPPXXXXXXXXXXXX	1.91018e-31	168.89	162.48	_AAPPPPPPPPPLES(ph)SPR_	AAPPPPPPPPPLES(0.915)S(0.085)PR	AAPPPPPPPPPLES(10.32)S(-10.32)PR	14	3	595.297	0.20183	0.66528	0.66528	NaN	NaN	0.7797	0.7797	NaN	NaN	0.89208
A2AN08;A2AN08-3;A2AN08-5	620;620;620	A2AN08	A2AN08	E3 ubiquitin-protein ligase UBR4	Ubr4	>sp|A2AN08|UBR4_MOUSE E3 ubiquitin-protein ligase UBR4 OS=Mus musculus GN=Ubr4 PE=1 SV=1;>sp|A2AN08-3|UBR4_MOUSE Isoform 3 of E3 ubiquitin-protein ligase UBR4 OS=Mus musculus GN=Ubr4;>sp|A2AN08-5|UBR4_MOUSE Isoform 5 of E3 ubiquitin-protein ligase UBR4 OS=	0.965043	14.4101	0.824078	6.70648	1.70709e-23	162.94	0.909743	10.0344	1.91018e-31	168.89	0.901693	9.62472	2.25748e-31	167.89	0.965043	14.4101	1.69969e-25	164.88		1	S	KAAPPPPPPPPPLESSPRVKSPNKQASGEKG	X;X;X;X;X;X;X;X;X;X;X;X;X;X;X;Phospho (STY);X;X;X;X;X;X;X;X;X;X;X;X;X;X;X	XPPPPPPPPPPPPPPPPPXXXXXXXXXXXXX	1.91018e-31	168.89	95.414	_AAPPPPPPPPPLESS(ph)PR_	AAPPPPPPPPPLES(0.035)S(0.965)PR	AAPPPPPPPPPLES(-14.41)S(14.41)PR	15	2	892.443	-0.21089	0.86389	0.86389	NaN	NaN	0.89982	0.89982	NaN	NaN	0.89208
A2AN08;A2AN08-3;A2AN08-5;A2AN08-4	181;181;181;181	A2AN08	A2AN08	E3 ubiquitin-protein ligase UBR4	Ubr4	>sp|A2AN08|UBR4_MOUSE E3 ubiquitin-protein ligase UBR4 OS=Mus musculus GN=Ubr4 PE=1 SV=1;>sp|A2AN08-3|UBR4_MOUSE Isoform 3 of E3 ubiquitin-protein ligase UBR4 OS=Mus musculus GN=Ubr4;>sp|A2AN08-5|UBR4_MOUSE Isoform 5 of E3 ubiquitin-protein ligase UBR4 OS=	0.999918	40.8438									0.999918	40.8438	0.00110077	98.942						1	S	TLSDVEDQKELASPVSPELRQKEVQMNFLNQ	X;X;X;X;X;X;X;X;X;X;X;X;X;X;X;Phospho (STY);X;X;X;X;X;X;X;X;X;Oxidation (M);X;X;X;X;X	XXXXXXXXXPPPPPPPPPPPXXXXXXXXXXX	0.00110077	98.942	98.942	_ELASPVS(ph)PELR_	ELASPVS(1)PELR	ELAS(-40.84)PVS(40.84)PELR	7	2	639.31	0.20244	2.4091	2.4091	NaN	NaN	2.3876	2.3876	NaN	NaN	1.6838
A2AN08;A2AN08-3;A2AN08-5;F6SSP6	2715;2726;2743;1438	A2AN08	A2AN08	E3 ubiquitin-protein ligase UBR4	Ubr4;Ubr4	>sp|A2AN08|UBR4_MOUSE E3 ubiquitin-protein ligase UBR4 OS=Mus musculus GN=Ubr4 PE=1 SV=1;>sp|A2AN08-3|UBR4_MOUSE Isoform 3 of E3 ubiquitin-protein ligase UBR4 OS=Mus musculus GN=Ubr4;>sp|A2AN08-5|UBR4_MOUSE Isoform 5 of E3 ubiquitin-protein ligase UBR4 OS=	0.924423	11.2522	0.663512	5.49903	1.8194e-06	168.22	0.909272	10.0095	3.14364e-06	182.28	0.906091	10.1627	1.93882e-06	166.97	0.924423	11.2522	3.08666e-06	164.33		1	S	RVLRPRNKRRHVTLPSSPRSNTPMGDKDDDD	X;X;X;X;X;X;X;X;X;X;X;X;X;X;X;Phospho (STY);X;X;X;X;X;X;X;X;X;X;X;X;X;X;X	XXXXXXXXXXPPPPPPPPPXXXXXXXXXXXX	1.68222e-06	182.28	143.5	_HVTLPS(ph)SPR_	HVT(0.006)LPS(0.924)S(0.069)PR	HVT(-21.67)LPS(11.25)S(-11.25)PR	6	2	537.261	0.3908	1.0301	1.0301	NaN	NaN	1.068	1.068	NaN	NaN	NaN
A2AN08;A2AN08-3;A2AN08-5;F6SSP6	2716;2727;2744;1439	A2AN08	A2AN08	E3 ubiquitin-protein ligase UBR4	Ubr4;Ubr4	>sp|A2AN08|UBR4_MOUSE E3 ubiquitin-protein ligase UBR4 OS=Mus musculus GN=Ubr4 PE=1 SV=1;>sp|A2AN08-3|UBR4_MOUSE Isoform 3 of E3 ubiquitin-protein ligase UBR4 OS=Mus musculus GN=Ubr4;>sp|A2AN08-5|UBR4_MOUSE Isoform 5 of E3 ubiquitin-protein ligase UBR4 OS=	0.983899	17.8668	0.912674	10.1918	1.8194e-06	168.22	0.818909	6.5534	1.30094e-06	173.64	0.842922	7.29676	2.58956e-06	186.87	0.983899	17.8668	1.97529e-06	177.44		1	S	VLRPRNKRRHVTLPSSPRSNTPMGDKDDDDD	X;X;X;X;X;X;X;X;X;X;X;X;X;X;X;Phospho (STY);X;X;X;X;X;X;X;X;X;X;X;X;X;X;X	XXXXXXXXXPPPPPPPPPXXXXXXXXXXXXX	1.30094e-06	186.87	122.69	_HVTLPSS(ph)PR_	HVTLPS(0.016)S(0.984)PR	HVT(-46.55)LPS(-17.87)S(17.87)PR	7	2	537.261	0.37628	0.63216	0.63216	NaN	NaN	0.886	0.886	NaN	NaN	NaN
Q8VEH2;A2AN61;Q3UUV0	830;806;776	Q8VEH2	Q8VEH2		Ciz1;Ciz1;Ciz1	>tr|Q8VEH2|Q8VEH2_MOUSE CDKN1A interacting zinc finger protein OS=Mus musculus GN=Ciz1 PE=2 SV=1;>tr|A2AN61|A2AN61_MOUSE CDKN1A interacting zinc finger protein OS=Mus musculus GN=Ciz1 PE=4 SV=1;>tr|Q3UUV0|Q3UUV0_MOUSE CDKN1A interacting zinc finger protein	1	66.2462	1	77.5617	0.00177422	81.448	1	89.9108	0.000976531	89.911	1	76.1506	0.00126638	86.641	1	66.2462	0.0757034	66.246		1	S	SPQDTVKMPSKVKPGSPGLPPPLRRSTRLKT	X;X;X;X;X;X;X;X;X;X;X;X;X;X;X;Phospho (STY);X;X;X;X;X;X;X;X;X;X;X;X;X;X;X	XXXXXXXXXXXPPPPPPPPPPPPPXXXXXXX	0.000976531	89.911	66.246	_VKPGS(ph)PGLPPPLR_	VKPGS(1)PGLPPPLR	VKPGS(66.25)PGLPPPLR	5	2	697.881	0.19789	0.48401	0.48401	NaN	NaN	0.65146	0.65146	NaN	NaN	NaN
A2ANY6;J3QMC5	4808;4803	A2ANY6	A2ANY6	Midasin	Mdn1	>tr|A2ANY6|A2ANY6_MOUSE Midasin OS=Mus musculus GN=Mdn1 PE=3 SV=1;>tr|J3QMC5|J3QMC5_MOUSE Midasin OS=Mus musculus GN=Mdn1 PE=3 SV=1	1	134.043	1	110.51	6.21624e-05	143.98	1	95.4281	8.60559e-07	180.84	1	98.3372	0.000223752	153.81	1	134.043	0.000255681	156.08		1	S	PGVDEEDSELVAKDDSLDAGNLNKNKKHQDE	X;X;X;X;X;X;X;X;X;X;X;X;X;X;X;Phospho (STY);X;X;X;X;X;X;X;X;X;X;X;X;X;X;X	XXXXXXXXXXXXXPPPPPPPPPPPXXXXXXX	8.60559e-07	180.84	134.04	_DDS(ph)LDAGNLNK_	DDS(1)LDAGNLNK	DDS(134.04)LDAGNLNK	3	2	621.256	0.28275	0.71566	0.71566	NaN	NaN	0.93478	0.93478	NaN	NaN	1.2718
A2ANY6;J3QMC5	4827;4822	A2ANY6	A2ANY6	Midasin	Mdn1	>tr|A2ANY6|A2ANY6_MOUSE Midasin OS=Mus musculus GN=Mdn1 PE=3 SV=1;>tr|J3QMC5|J3QMC5_MOUSE Midasin OS=Mus musculus GN=Mdn1 PE=3 SV=1	1	73.1684	1	36.6373	0.0581541	36.637					1	73.1684	0.00106612	73.168						1	S	GNLNKNKKHQDEKEDSEPEDVEQGQEKINEQ	X;X;X;X;X;X;X;X;X;X;X;X;X;X;X;Phospho (STY);X;X;X;X;X;X;X;X;X;X;X;X;X;X;X	XXXXXXXXPPPPPPPPPPPPPPPPPPPXXXX	0.00106612	73.168	73.168	_HQDEKEDS(ph)EPEDVEQGQEK_	HQDEKEDS(1)EPEDVEQGQEK	HQDEKEDS(73.17)EPEDVEQGQEK	8	3	779.311	-0.40426	0.78538	0.78538	NaN	NaN	1.0247	1.0247	NaN	NaN	NaN
A2APB8	414	A2APB8	A2APB8	Targeting protein for Xklp2	Tpx2	>sp|A2APB8|TPX2_MOUSE Targeting protein for Xklp2 OS=Mus musculus GN=Tpx2 PE=1 SV=1	1	51.841	1	51.841	0.0556883	69.815					1	98.1049	0.00117021	98.105						1	S	QYKFKARELDPRIFESGPILPKRAPVKPPTQ	X;X;X;X;X;X;X;X;X;X;X;X;X;X;X;Phospho (STY);X;X;X;X;X;X;X;X;X;X;X;X;X;X;X	XXXXXXXXXXXXPPPPPPPPPPXXXXXXXXX	0.00117021	98.105	51.841	_IFES(ph)GPILPK_	IFES(1)GPILPK	IFES(51.84)GPILPK	4	2	590.804	0.025492	0.77121	0.77121	NaN	NaN	0.98952	0.98952	NaN	NaN	NaN
A2APB8	486	A2APB8	A2APB8	Targeting protein for Xklp2	Tpx2	>sp|A2APB8|TPX2_MOUSE Targeting protein for Xklp2 OS=Mus musculus GN=Tpx2 PE=1 SV=1	1	91.8534	1	130.562	0.0173053	138.1	1	107.574	0.000198767	113.88	1	111.167	0.0342148	114.28	1	91.8534	0.0248234	130.56		1	S	VGVPEKKVIPATVPKSPVFALKNRIRVPIKD	X;X;X;X;X;X;X;X;X;X;X;X;X;X;X;Phospho (STY);X;X;X;X;X;X;X;X;X;X;X;X;X;X;X	XXXXXXXPPPPPPPPPPPPPPPXXXXXXXXX	0.000198767	138.1	91.853	_S(ph)PVFALK_	S(1)PVFALK	S(91.85)PVFALK	1	2	421.215	-0.21332	0.82116	0.82116	NaN	NaN	1.042	1.042	NaN	NaN	NaN
A2APB8	737	A2APB8	A2APB8	Targeting protein for Xklp2	Tpx2	>sp|A2APB8|TPX2_MOUSE Targeting protein for Xklp2 OS=Mus musculus GN=Tpx2 PE=1 SV=1	1	68.9856	1	68.9856	1.06633e-09	145.31	0.999978	46.6622	5.13534e-06	127.18	0.999995	53.1609	5.44094e-09	140.24	0.999999	59.2208	8.63296e-07	134.98		1	S	AVEVKSSELPLTVPVSPKFSTRFQ_______	X;X;X;X;X;X;X;X;X;X;X;X;X;X;X;Phospho (STY);X;X;X;X;X;X;X;X;X;X;X;X;X;X;X	XXXXXPPPPPPPPPPPPPXXXXXXXXXXXXX	1.06633e-09	145.31	145.31	_SSELPLTVPVS(ph)PK_	SSELPLTVPVS(1)PK	S(-134.03)S(-134.03)ELPLT(-68.99)VPVS(68.99)PK	11	2	717.368	0.097872	0.76364	0.76364	NaN	NaN	0.86549	0.86549	NaN	NaN	NaN
A2APF7;Q9QY24	383;383	A2APF7	A2APF7	Z-DNA-binding protein 1	Zbp1;Zbp1	>tr|A2APF7|A2APF7_MOUSE Z-DNA binding protein 1 OS=Mus musculus GN=Zbp1 PE=4 SV=1;>sp|Q9QY24|ZBP1_MOUSE Z-DNA-binding protein 1 OS=Mus musculus GN=Zbp1 PE=1 SV=1	0.795758	9.13971													0.795758	9.13971	0.000447947	128.79		1	S	SMLPTSELRAMALGDSSPQTTEPVLREHEVQ	Phospho (STY);Oxidation (M);X;X;X;X;X;X;X;X;Oxidation (M);X;X;X;X;Phospho (STY);X;X;X;X;X;X;X;X;X;X;X;X;X;X;X	XXXXXXXXXPPPPPPPPPPPPPPPPPXXXXX	0.000447947	128.79	128.79	_AM(ox)ALGDS(ph)SPQTTEPVLR_	AMALGDS(0.796)S(0.083)PQT(0.097)T(0.024)EPVLR	AMALGDS(9.14)S(-9.83)PQT(-9.14)T(-15.14)EPVLR	7	2	934.927	-0.37329	8.7958	8.7958	NaN	NaN	9.0868	9.0868	NaN	NaN	NaN
A2APF7;Q9QY24	384;384	A2APF7	A2APF7	Z-DNA-binding protein 1	Zbp1;Zbp1	>tr|A2APF7|A2APF7_MOUSE Z-DNA binding protein 1 OS=Mus musculus GN=Zbp1 PE=4 SV=1;>sp|Q9QY24|ZBP1_MOUSE Z-DNA-binding protein 1 OS=Mus musculus GN=Zbp1 PE=1 SV=1	0.988165	19.4029	0.940158	13.0981	0.0247805	88.872	0.988165	19.4029	2.35174e-24	188.86					0.770081	6.5172	0.0481788	78.95		1	S	MLPTSELRAMALGDSSPQTTEPVLREHEVQD	Oxidation (M);X;X;X;X;X;X;X;X;Oxidation (M);X;X;X;X;X;Phospho (STY);X;X;X;X;X;X;X;X;X;X;X;X;X;X;X	XXXXXXXXPPPPPPPPPPPPPPPPPXXXXXX	2.35174e-24	188.86	182.22	_AMALGDSS(ph)PQTTEPVLR_	AMALGDS(0.011)S(0.988)PQTTEPVLR	AMALGDS(-19.4)S(19.4)PQT(-33)T(-58.8)EPVLR	8	2	926.929	-0.55352	0.12745	0.12745	NaN	NaN	0.14777	0.14777	NaN	NaN	NaN
Q9Z238;A2API1	21;20	Q9Z238	Q9Z238	G1/S-specific cyclin-E2	Ccne2;Ccne2	>sp|Q9Z238|CCNE2_MOUSE G1/S-specific cyclin-E2 OS=Mus musculus GN=Ccne2 PE=2 SV=1;>tr|A2API1|A2API1_MOUSE Cyclin E2 OS=Mus musculus GN=Ccne2 PE=3 SV=1	0.999825	37.5762	0.999825	37.5762	8.19192e-05	89.374					0.997594	26.1768	0.00428659	95.767						1	S	SRLQAKQHAQPNQPDSPQETQIIQAKKRKTA	X;X;X;X;X;X;X;X;X;X;X;X;X;X;X;Phospho (STY);X;X;X;X;X;X;X;X;X;X;X;X;X;X;X	XXXXXXPPPPPPPPPPPPPPPPPPPPXXXXX	5.49192e-05	95.767	89.374	_QHAQPNQPDS(ph)PQETQIIQAK_	QHAQPNQPDS(1)PQETQIIQAK	QHAQPNQPDS(37.58)PQET(-37.58)QIIQAK	10	3	780.032	-0.30009	0.45971	0.45971	NaN	NaN	0.5238	0.5238	NaN	NaN	NaN
F7AA26;A2API8;A2API9	236;33;53	F7AA26	F7AA26		Gm20459;Akap2;Akap2	>tr|F7AA26|F7AA26_MOUSE Protein Gm20459 (Fragment) OS=Mus musculus GN=Gm20459 PE=4 SV=1;>tr|A2API8|A2API8_MOUSE A kinase (PRKA) anchor protein 2 OS=Mus musculus GN=Akap2 PE=4 SV=1;>tr|A2API9|A2API9_MOUSE A kinase (PRKA) anchor protein 2 (Fragment) OS=Mus m	0.86328	8.71484									0.86328	8.71484	0.00245472	76.759						1	S	SKQDNCGDSRLEPAASSLSPDHKNMEIGVSV	X;X;X;X;X;X;X;X;X;X;X;X;X;X;X;Phospho (STY);X;X;X;X;X;X;X;X;X;X;X;X;X;X;X	XXXXXXXXXXPPPPPPPPPPPPPXXXXXXXX	0.00245472	76.759	76.759	_LEPAAS(ph)SLSPDHK_	LEPAAS(0.863)S(0.116)LS(0.021)PDHK	LEPAAS(8.71)S(-8.71)LS(-16.21)PDHK	6	2	716.329	-0.054279	0.36777	0.36777	NaN	NaN	0.36671	0.36671	NaN	NaN	NaN
F7AA26;A2API8;A2API9	237;34;54	F7AA26	F7AA26		Gm20459;Akap2;Akap2	>tr|F7AA26|F7AA26_MOUSE Protein Gm20459 (Fragment) OS=Mus musculus GN=Gm20459 PE=4 SV=1;>tr|A2API8|A2API8_MOUSE A kinase (PRKA) anchor protein 2 OS=Mus musculus GN=Akap2 PE=4 SV=1;>tr|A2API9|A2API9_MOUSE A kinase (PRKA) anchor protein 2 (Fragment) OS=Mus m	0.606731	2.72894	0.476936	0	0.00129082	85.909					0.606731	2.72894	0.00162543	82.362						1	S	KQDNCGDSRLEPAASSLSPDHKNMEIGVSVA	X;X;X;X;X;X;X;X;X;X;X;X;X;X;X;Phospho (STY);X;X;X;X;X;X;X;X;X;X;X;X;X;X;X	XXXXXXXXXPPPPPPPPPPPPPXXXXXXXXX	0.00129082	85.909	82.362	_LEPAASS(ph)LSPDHK_	LEPAAS(0.07)S(0.607)LS(0.324)PDHK	LEPAAS(-9.4)S(2.73)LS(-2.73)PDHK	7	2	716.329	0.46104	0.3691	0.3691	NaN	NaN	0.35467	0.35467	NaN	NaN	NaN
F7AA26;A2API8;A2API9	239;36;56	F7AA26	F7AA26		Gm20459;Akap2;Akap2	>tr|F7AA26|F7AA26_MOUSE Protein Gm20459 (Fragment) OS=Mus musculus GN=Gm20459 PE=4 SV=1;>tr|A2API8|A2API8_MOUSE A kinase (PRKA) anchor protein 2 OS=Mus musculus GN=Akap2 PE=4 SV=1;>tr|A2API9|A2API9_MOUSE A kinase (PRKA) anchor protein 2 (Fragment) OS=Mus m	0.998397	30.9548	0.998397	30.9548	0.000828119	92.19					0.779009	7.8862	0.000200987	114.31						1	S	DNCGDSRLEPAASSLSPDHKNMEIGVSVAEC	X;X;X;X;X;X;X;X;X;X;X;X;X;X;X;Phospho (STY);X;X;X;X;X;X;X;X;X;X;X;X;X;X;X	XXXXXXXPPPPPPPPPPPPPXXXXXXXXXXX	0.000200987	114.31	92.19	_LEPAASSLS(ph)PDHK_	LEPAAS(0.001)S(0.001)LS(0.998)PDHK	LEPAAS(-30.95)S(-30.95)LS(30.95)PDHK	9	2	716.329	0.05671	1.1698	1.1698	NaN	NaN	1.4552	1.4552	NaN	NaN	NaN
F7AA26;A2API8;O54931;O54931-2;O54931-4;O54931-5;O54931-3	894;691;650;650;526;526;650	F7AA26	F7AA26	A-kinase anchor protein 2	Gm20459;Akap2;Akap2	>tr|F7AA26|F7AA26_MOUSE Protein Gm20459 (Fragment) OS=Mus musculus GN=Gm20459 PE=4 SV=1;>tr|A2API8|A2API8_MOUSE A kinase (PRKA) anchor protein 2 OS=Mus musculus GN=Akap2 PE=4 SV=1;>sp|O54931|AKAP2_MOUSE A-kinase anchor protein 2 OS=Mus musculus GN=Akap2 PE	0.761091	5.03205	0.761091	5.03205	0.0395994	41.711					0.5	0	0.00265192	68.257						1	S	PGSEKPQGMFAPPQVSSPVQEKRDILPKNLP	X;X;X;X;X;X;X;X;X;X;X;X;X;X;X;Phospho (STY);X;X;X;X;X;X;X;X;X;X;X;X;X;X;X	XXXXXPPPPPPPPPPPPPPPPPXXXXXXXXX	0.00265192	68.257	41.711	_PQGMFAPPQVS(ph)SPVQEK_	PQGMFAPPQVS(0.761)S(0.239)PVQEK	PQGMFAPPQVS(5.03)S(-5.03)PVQEK	11	2	953.942	1.571	0.41533	0.41533	NaN	NaN	0.52586	0.52586	NaN	NaN	NaN
F7AA26;A2API8;O54931;O54931-2;O54931-4;O54931-5;O54931-3	895;692;651;651;527;527;651	F7AA26	F7AA26	A-kinase anchor protein 2	Gm20459;Akap2;Akap2	>tr|F7AA26|F7AA26_MOUSE Protein Gm20459 (Fragment) OS=Mus musculus GN=Gm20459 PE=4 SV=1;>tr|A2API8|A2API8_MOUSE A kinase (PRKA) anchor protein 2 OS=Mus musculus GN=Akap2 PE=4 SV=1;>sp|O54931|AKAP2_MOUSE A-kinase anchor protein 2 OS=Mus musculus GN=Akap2 PE	0.922881	10.7799									0.922881	10.7799	0.000734471	78.708						1	S	GSEKPQGMFAPPQVSSPVQEKRDILPKNLPA	X;X;X;X;X;X;X;X;X;X;X;X;X;X;X;Phospho (STY);X;X;X;X;X;X;X;X;X;X;X;X;X;X;X	XXXXPPPPPPPPPPPPPPPPPXXXXXXXXXX	0.000734471	78.708	78.708	_PQGMFAPPQVSS(ph)PVQEK_	PQGMFAPPQVS(0.077)S(0.923)PVQEK	PQGMFAPPQVS(-10.78)S(10.78)PVQEK	12	2	953.942	0.32541	1.5603	1.5603	NaN	NaN	1.5413	1.5413	NaN	NaN	NaN
F7AA26;A2API8;O54931;O54931-2;O54931-4;O54931-5;O54931-3	984;781;740;740;616;616;740	F7AA26	F7AA26	A-kinase anchor protein 2	Gm20459;Akap2;Akap2	>tr|F7AA26|F7AA26_MOUSE Protein Gm20459 (Fragment) OS=Mus musculus GN=Gm20459 PE=4 SV=1;>tr|A2API8|A2API8_MOUSE A kinase (PRKA) anchor protein 2 OS=Mus musculus GN=Akap2 PE=4 SV=1;>sp|O54931|AKAP2_MOUSE A-kinase anchor protein 2 OS=Mus musculus GN=Akap2 PE	0.999973	45.6245	0.999946	42.7153	9.06686e-05	125.82	0.999973	45.6245	0.000127165	123.95	0.999935	41.8921	0.000294765	116.24	0.999965	44.5444	7.75637e-05	138.89		1	S	MVGPFKLRSRKQRTLSMIEEEIRAAQEREEE	X;X;X;X;X;X;X;X;X;X;X;X;X;X;X;Phospho (STY);Oxidation (M);X;X;X;X;X;X;X;X;X;X;X;X;X;X	XXXXXXXXXXXXXPPPPPPPPPPXXXXXXXX	7.08742e-05	138.89	123.95	_TLS(ph)MIEEEIR_	TLS(1)MIEEEIR	T(-45.62)LS(45.62)MIEEEIR	3	2	650.796	0.41264	0.81381	0.81381	NaN	NaN	0.93917	0.93917	NaN	NaN	0.26092
F7AA26;A2API8;O54931;O54931-2;O54931-4;O54931-5	1043;840;799;799;675;675	F7AA26	F7AA26	A-kinase anchor protein 2	Gm20459;Akap2;Akap2	>tr|F7AA26|F7AA26_MOUSE Protein Gm20459 (Fragment) OS=Mus musculus GN=Gm20459 PE=4 SV=1;>tr|A2API8|A2API8_MOUSE A kinase (PRKA) anchor protein 2 OS=Mus musculus GN=Akap2 PE=4 SV=1;>sp|O54931|AKAP2_MOUSE A-kinase anchor protein 2 OS=Mus musculus GN=Akap2 PE	0.906185	12.8631	0.330347	0	0.00178971	44.6	0.587315	4.55425	1.29618e-05	64.498	0.678295	6.25444	8.60508e-37	109.23	0.906185	12.8631	5.2454e-13	83.312		1	S	YKTAPGKIEKVKPPPSPTTEGPSLQPDLAPE	X;X;X;X;X;X;X;X;X;X;X;X;X;X;X;Phospho (STY);X;X;X;X;X;X;X;X;X;X;X;X;X;X;X	XXXXXXXXXXPPPPPPPPPPPPPPPPPPPPP	8.60508e-37	109.23	83.312	_VKPPPS(ph)PTTEGPSLQPDLAPEEAAGTQRPK_	VKPPPS(0.906)PT(0.047)T(0.047)EGPSLQPDLAPEEAAGTQRPK	VKPPPS(12.86)PT(-12.86)T(-12.86)EGPS(-40.99)LQPDLAPEEAAGT(-80.14)QRPK	6	4	794.647	-0.28377	0.83081	0.83081	NaN	NaN	0.92502	0.92502	NaN	NaN	NaN
A2APM2;P15379;P15379-7;P15379-8;A2APM1;P15379-4;P15379-9;P15379-10;Q80X37;E9QKM8;P15379-5;P15379-11;A2APM4;P15379-6;A2APM3;P15379-3;A2APM5;Q3U8S1;P15379-2	735;733;691;652;612;609;572;571;535;532;531;530;453;451;419;416;389;320;318	A2APM2	A2APM2	CD44 antigen	Cd44;Cd44;Cd44;Cd44;Cd44;Cd44;Cd44;Cd44;Cd44	>tr|A2APM2|A2APM2_MOUSE CD44 antigen OS=Mus musculus GN=Cd44 PE=4 SV=1;>sp|P15379|CD44_MOUSE CD44 antigen OS=Mus musculus GN=Cd44 PE=1 SV=3;>sp|P15379-7|CD44_MOUSE Isoform 2 of CD44 antigen OS=Mus musculus GN=Cd44;>sp|P15379-8|CD44_MOUSE Isoform 3 of CD44	1	70.338	1	70.338	6.29358e-05	141.85					0.999799	36.9643	0.0629813	90.412						1	S	LVINGGNGTVEDRKPSELNGEASKSQEMVHL	X;X;X;X;X;X;X;X;Phospho (STY);X;X;X;X;X;X;Phospho (STY);X;X;X;X;X;X;X;X;Phospho (STY);X;X;Oxidation (M);X;X;X	XXXXXXXXXXXXXPPPPPPPPPPPPPPPPPP	6.29358e-05	141.85	141.85	_KPS(ph)ELNGEASK_	KPS(1)ELNGEASK	KPS(70.34)ELNGEAS(-70.34)K	3	2	620.284	-0.55474	0.17684	0.17684	NaN	NaN	0.25161	0.25161	NaN	NaN	0.95681
A2APM2;P15379;P15379-7;P15379-8;A2APM1;P15379-4;P15379-9;P15379-10;Q80X37;E9QKM8;P15379-5;P15379-11;A2APM4;P15379-6;A2APM3;P15379-3;A2APM5;Q3U8S1;P15379-2	742;740;698;659;619;616;579;578;542;539;538;537;460;458;426;423;396;327;325	A2APM2	A2APM2	CD44 antigen	Cd44;Cd44;Cd44;Cd44;Cd44;Cd44;Cd44;Cd44;Cd44	>tr|A2APM2|A2APM2_MOUSE CD44 antigen OS=Mus musculus GN=Cd44 PE=4 SV=1;>sp|P15379|CD44_MOUSE CD44 antigen OS=Mus musculus GN=Cd44 PE=1 SV=3;>sp|P15379-7|CD44_MOUSE Isoform 2 of CD44 antigen OS=Mus musculus GN=Cd44;>sp|P15379-8|CD44_MOUSE Isoform 3 of CD44	0.940796	12.2264	0.49819	0	0.0145636	40.968	0.499486	0	0.00181688	56.036	0.940796	12.2264	0.00199042	56.036	0.556053	0.984409	0.00921302	44.577		1	S	GTVEDRKPSELNGEASKSQEMVHLVNKEPSE	X;Phospho (STY);X;X;X;X;X;X;X;X;X;X;X;X;X;Phospho (STY);X;Phospho (STY);X;X;Oxidation (M);X;X;X;X;X;X;X;X;X;X	XXXXXXPPPPPPPPPPPPPPPPPPPPPXXXX	0.00181688	56.036	56.036	_KPSELNGEAS(ph)KSQEM(ox)VHLVNK_	KPS(0.003)ELNGEAS(0.941)KS(0.056)QEMVHLVNK	KPS(-25.17)ELNGEAS(12.23)KS(-12.23)QEMVHLVNK	10	4	606.042	-0.18326	1.084	1.084	NaN	NaN	1.0191	1.0191	NaN	NaN	0.95681
A2APM2;P15379;P15379-7;P15379-8;A2APM1;P15379-4;P15379-9;P15379-10;Q80X37;E9QKM8;P15379-5;P15379-11;A2APM4;P15379-6;A2APM3;P15379-3;A2APM5;Q3U8S1;P15379-2	744;742;700;661;621;618;581;580;544;541;540;539;462;460;428;425;398;329;327	A2APM2	A2APM2	CD44 antigen	Cd44;Cd44;Cd44;Cd44;Cd44;Cd44;Cd44;Cd44;Cd44	>tr|A2APM2|A2APM2_MOUSE CD44 antigen OS=Mus musculus GN=Cd44 PE=4 SV=1;>sp|P15379|CD44_MOUSE CD44 antigen OS=Mus musculus GN=Cd44 PE=1 SV=3;>sp|P15379-7|CD44_MOUSE Isoform 2 of CD44 antigen OS=Mus musculus GN=Cd44;>sp|P15379-8|CD44_MOUSE Isoform 3 of CD44	1	55.2612	1	67.9969	1.82744e-06	173.06	1	93.7657	5.06992e-11	183.89	1	98.5308	1.03912e-06	173.68	1	55.2612	1.82744e-06	173.06		1	S	VEDRKPSELNGEASKSQEMVHLVNKEPSETP	X;X;X;X;X;X;Phospho (STY);X;X;X;X;X;X;X;X;Phospho (STY);X;X;Oxidation (M);X;X;X;X;X;X;X;X;X;X;X;X	XXXXPPPPPPPPPPPPPPPPPPPPPXXXXXX	5.06992e-11	183.89	55.261	_S(ph)QEM(ox)VHLVNK_	S(1)QEMVHLVNK	S(55.26)QEMVHLVNK	1	2	640.789	-0.063884	0.72576	0.72576	NaN	NaN	0.96634	0.96634	NaN	NaN	NaN
Q80TY0;A2AQ41	358;358	Q80TY0	Q80TY0	Formin-binding protein 1	Fnbp1;Fnbp1	>sp|Q80TY0|FNBP1_MOUSE Formin-binding protein 1 OS=Mus musculus GN=Fnbp1 PE=1 SV=2;>tr|A2AQ41|A2AQ41_MOUSE Formin binding protein 1 OS=Mus musculus GN=Fnbp1 PE=4 SV=1	0.99477	23.3194					0.99477	23.3194	2.5754e-09	70.605										1	S	PPASASPSAVPNGPQSPKQPKEPLSHRFNEF	X;X;X;X;X;X;X;X;X;X;X;X;X;X;X;Phospho (STY);X;X;X;X;X;X;X;X;X;X;X;X;X;X;X	PPPPPPPPPPPPPPPPPPXXXXXXXXXXXXX	2.5754e-09	70.605	70.605	_LMSLLTSPHQPPPPPPASASPSAVPNGPQS(ph)PK_	LMSLLTSPHQPPPPPPASASPS(0.005)AVPNGPQS(0.995)PK	LMS(-62.91)LLT(-62.8)S(-62.68)PHQPPPPPPAS(-37.99)AS(-33.56)PS(-23.32)AVPNGPQS(23.32)PK	30	3	1088.88	-1.0885	1.4947	1.4947	NaN	NaN	1.8301	1.8301	NaN	NaN	NaN
Q80TY0;A2AQ41;A2AQ45;A2AQ42;A2AQ44;A2AQ43;Q80TY0-3;Q80TY0-2;Q80TY0-4;F6VVN1	496;491;467;462;435;430;430;430;402;264	Q80TY0	Q80TY0	Formin-binding protein 1	Fnbp1;Fnbp1;Fnbp1;Fnbp1;Fnbp1;Fnbp1;Fnbp1	>sp|Q80TY0|FNBP1_MOUSE Formin-binding protein 1 OS=Mus musculus GN=Fnbp1 PE=1 SV=2;>tr|A2AQ41|A2AQ41_MOUSE Formin binding protein 1 OS=Mus musculus GN=Fnbp1 PE=4 SV=1;>tr|A2AQ45|A2AQ45_MOUSE Formin binding protein 1 OS=Mus musculus GN=Fnbp1 PE=4 SV=1;>tr|A	0.991358	20.9747	0.984509	19.5216	1.06038e-05	78.794	0.857617	8.20755	0.00780344	43.955	0.974425	16.1031	0.0025377	51.524	0.991358	20.9747	0.00153553	56.304		1	S	VEGRLPARSEQARRQSGLYDGQTHQTVTNCA	X;X;X;X;X;X;X;X;X;X;X;X;X;X;X;Phospho (STY);X;X;X;X;X;X;X;X;X;X;X;X;X;X;X	XXXXXXXXXXXXXPPPPPPPPPPPPPPPPPP	1.06038e-05	78.794	56.304	_RQS(ph)GLYDGQTHQTVTNCAQDR_	RQS(0.991)GLY(0.008)DGQT(0.001)HQTVTNCAQDR	RQS(20.97)GLY(-20.97)DGQT(-31.63)HQT(-44.68)VT(-52.05)NCAQDR	3	3	839.031	-0.71267	1.177	1.177	NaN	NaN	1.2883	1.2883	NaN	NaN	NaN
A2AQ53	2704	A2AQ53	A2AQ53		Fbn1	>tr|A2AQ53|A2AQ53_MOUSE Fibrillin 1 OS=Mus musculus GN=Fbn1 PE=4 SV=1	0.863706	8.16178	0.499809	0	1.89254e-16	105.46	0.863706	8.16178	1.027e-19	154.6					0.440505	0	0.0130126	57.152		1	S	VSGMGMGRGGPEPPASSEMDDNSLSPEACYE	X;X;X;Oxidation (M);X;Oxidation (M);X;X;X;X;X;X;X;X;X;Phospho (STY);X;X;Oxidation (M);X;X;X;X;X;X;X;X;X;X;X;X	XXXXXXXXPPPPPPPPPPPPPPPPPPPPPPP	2.17501e-21	154.6	118.54	_GGPEPPAS(ph)SEMDDNSLSPEACYECK_	GGPEPPAS(0.864)S(0.132)EMDDNS(0.004)LSPEACYECK	GGPEPPAS(8.16)S(-8.16)EMDDNS(-22.92)LS(-61.25)PEACY(-101.52)ECK	8	3	936.355	-0.49416	10.298	10.298	NaN	NaN	12.954	12.954	NaN	NaN	NaN
A2AQ53	2705	A2AQ53	A2AQ53		Fbn1	>tr|A2AQ53|A2AQ53_MOUSE Fibrillin 1 OS=Mus musculus GN=Fbn1 PE=4 SV=1	0.499962	0	0.499809	0	1.89254e-16	105.46	0.499962	0	1.027e-19	154.6					0.440505	0	0.0130126	57.152		1	S	SGMGMGRGGPEPPASSEMDDNSLSPEACYEC	X;X;Oxidation (M);X;Oxidation (M);X;X;X;X;X;X;X;X;X;X;X;X;X;X;X;X;X;X;X;X;X;X;X;X;X;X	XXXXXXXXXXXXXXXXXXXXXXXXXXXXXXX	2.17501e-21	154.6	154.6	_GGPEPPAS(ph)SEMDDNSLSPEACYECK_	GGPEPPAS(0.5)S(0.5)EMDDNSLSPEACYECK	GGPEPPAS(0)S(0)EMDDNS(-38.21)LS(-89.42)PEACY(-132.19)ECK	9	3	936.355	-0.95434	11.074	11.074	NaN	NaN	14.084	14.084	NaN	NaN	NaN
A2AQ53	2711	A2AQ53	A2AQ53		Fbn1	>tr|A2AQ53|A2AQ53_MOUSE Fibrillin 1 OS=Mus musculus GN=Fbn1 PE=4 SV=1	0.554082	3.9535	0.554082	3.9535	1.91482e-16	106.39														1	S	RGGPEPPASSEMDDNSLSPEACYECKINGYP	X;X;X;X;X;X;X;X;X;X;X;X;X;X;X;Phospho (STY);X;X;X;X;X;X;X;X;X;X;X;X;X;X;X	XPPPPPPPPPPPPPPPPPPPPPPPPPXXXXX	1.91482e-16	106.39	106.39	_GGPEPPASSEMDDNS(ph)LSPEACYECK_	GGPEPPAS(0.223)S(0.223)EMDDNS(0.554)LSPEACYECK	GGPEPPAS(-3.95)S(-3.95)EMDDNS(3.95)LS(-59.81)PEACY(-90.33)ECK	15	3	936.355	-0.39215	2.5157	2.5157	NaN	NaN	3.4081	3.4081	NaN	NaN	NaN
Q922B9;A2AQD6;Q922B9-3;A2AQD5	736;736;585;736	Q922B9	Q922B9	Sperm-specific antigen 2 homolog	Ssfa2;Ssfa2;Ssfa2	>sp|Q922B9|SSFA2_MOUSE Sperm-specific antigen 2 homolog OS=Mus musculus GN=Ssfa2 PE=1 SV=3;>tr|A2AQD6|A2AQD6_MOUSE Sperm specific antigen 2 OS=Mus musculus GN=Ssfa2 PE=4 SV=1;>sp|Q922B9-3|SSFA2_MOUSE Isoform 3 of Sperm-specific antigen 2 homolog OS=Mus mus	0.971835	15.3967	0.822773	6.68483	0.00231793	77.468	0.940022	12.0603	0.0122807	84.41	0.971835	15.3967	0.00144287	84.297	0.799147	6.00782	0.00162665	82.349		1	S	KQRYLLAKAGYPLRRSQSLPTTLLSPVRVVS	X;X;X;X;X;X;X;X;X;X;X;X;X;X;X;Phospho (STY);X;X;X;X;X;X;X;X;X;X;X;X;X;X;X	XXXXXXXXXXXXXXXPPPPPPPPPPPPPXXX	0.00144287	84.41	81.346	_S(ph)QSLPTTLLSPVR_	S(0.972)QS(0.028)LPTTLLSPVR	S(15.4)QS(-15.4)LPT(-43.7)T(-41.16)LLS(-78.2)PVR	1	2	739.884	0.14042	1.891	1.891	NaN	NaN	1.9503	1.9503	NaN	NaN	NaN
Q922B9;A2AQD6;Q922B9-3;A2AQD5	738;738;587;738	Q922B9	Q922B9	Sperm-specific antigen 2 homolog	Ssfa2;Ssfa2;Ssfa2	>sp|Q922B9|SSFA2_MOUSE Sperm-specific antigen 2 homolog OS=Mus musculus GN=Ssfa2 PE=1 SV=3;>tr|A2AQD6|A2AQD6_MOUSE Sperm specific antigen 2 OS=Mus musculus GN=Ssfa2 PE=4 SV=1;>sp|Q922B9-3|SSFA2_MOUSE Isoform 3 of Sperm-specific antigen 2 homolog OS=Mus mus	0.999918	40.8864	0.999719	38.9792	1.1245e-09	170.16	0.999918	40.8864	1.1264e-19	200.58	0.998914	29.7078	5.8199e-11	175.39	0.999848	38.3008	4.39219e-15	192.24		1	S	RYLLAKAGYPLRRSQSLPTTLLSPVRVVSSV	X;X;X;X;X;X;X;X;X;X;X;X;X;X;X;Phospho (STY);X;X;X;X;X;X;X;X;X;X;X;X;X;X;X	XXXXXXXXXXXXXPPPPPPPPPPPPPXXXXX	1.1264e-19	200.58	200.58	_SQS(ph)LPTTLLSPVR_	SQS(1)LPTTLLSPVR	S(-40.89)QS(40.89)LPT(-73.28)T(-79.81)LLS(-151.68)PVR	3	2	739.884	0.047996	0.48307	0.48307	NaN	NaN	0.66379	0.66379	NaN	NaN	NaN
P16951;P16951-2;G3UXC3;A2AQE9;P16951-3;F6Z2B2	247;149;247;149;207;41	P16951	P16951	Cyclic AMP-dependent transcription factor ATF-2	Atf2;Atf2;Atf2;Atf2	>sp|P16951|ATF2_MOUSE Cyclic AMP-dependent transcription factor ATF-2 OS=Mus musculus GN=Atf2 PE=1 SV=2;>sp|P16951-2|ATF2_MOUSE Isoform 2 of Cyclic AMP-dependent transcription factor ATF-2 OS=Mus musculus GN=Atf2;>tr|G3UXC3|G3UXC3_MOUSE Cyclic AMP-dependen	0.726074	5.53347					0.726074	5.53347	9.20255e-05	60.032										1	S	RPVTMVPSVPGIPGPSSPQPVQSEAKMRLKA	X;X;X;X;Oxidation (M);X;X;X;X;X;X;X;X;X;X;Phospho (STY);X;X;X;X;X;X;X;X;X;X;X;X;X;X;X	PPPPPPPPPPPPPPPPPPPPPPPPPPXXXXX	9.20255e-05	60.032	31.976	_PVTM(ox)VPSVPGIPGPS(ph)SPQPVQSEAK_	PVT(0.003)MVPS(0.002)VPGIPGPS(0.726)S(0.203)PQPVQS(0.066)EAK	PVT(-23.82)MVPS(-26.02)VPGIPGPS(5.53)S(-5.53)PQPVQS(-10.41)EAK	15	3	861.424	-0.22533	0.56859	0.56859	NaN	NaN	0.70996	0.70996	NaN	NaN	NaN
P16951;P16951-2;G3UXC3;A2AQE9;P16951-3;F6Z2B2	248;150;248;150;208;42	P16951	P16951	Cyclic AMP-dependent transcription factor ATF-2	Atf2;Atf2;Atf2;Atf2	>sp|P16951|ATF2_MOUSE Cyclic AMP-dependent transcription factor ATF-2 OS=Mus musculus GN=Atf2 PE=1 SV=2;>sp|P16951-2|ATF2_MOUSE Isoform 2 of Cyclic AMP-dependent transcription factor ATF-2 OS=Mus musculus GN=Atf2;>tr|G3UXC3|G3UXC3_MOUSE Cyclic AMP-dependen	0.622062	4.97124					0.496255	0	9.20255e-05	60.032	0.299107	0	0.00616943	42.885	0.622062	4.97124	0.00305912	47.75		1	S	PVTMVPSVPGIPGPSSPQPVQSEAKMRLKAA	X;X;X;Oxidation (M);X;X;X;X;X;X;X;X;X;X;X;Phospho (STY);X;X;X;X;X;X;X;X;X;X;X;X;X;X;X	PPPPPPPPPPPPPPPPPPPPPPPPPXXXXXX	9.20255e-05	60.032	39.188	_PVTM(ox)VPSVPGIPGPSS(ph)PQPVQSEAK_	PVTMVPSVPGIPGPS(0.179)S(0.622)PQPVQS(0.198)EAK	PVT(-35.99)MVPS(-33.48)VPGIPGPS(-5.4)S(4.97)PQPVQS(-4.97)EAK	16	3	861.424	-0.44364	0.84501	0.84501	NaN	NaN	0.74609	0.74609	NaN	NaN	NaN
P16951;P16951-2;G3UXC3;A2AQE9;P16951-3;F6Z2B2	254;156;254;156;214;48	P16951	P16951	Cyclic AMP-dependent transcription factor ATF-2	Atf2;Atf2;Atf2;Atf2	>sp|P16951|ATF2_MOUSE Cyclic AMP-dependent transcription factor ATF-2 OS=Mus musculus GN=Atf2 PE=1 SV=2;>sp|P16951-2|ATF2_MOUSE Isoform 2 of Cyclic AMP-dependent transcription factor ATF-2 OS=Mus musculus GN=Atf2;>tr|G3UXC3|G3UXC3_MOUSE Cyclic AMP-dependen	0.97343	19.0884	0.486434	0.686391	0.0170398	38.583	0.742092	6.35941	0.000563318	53.342	0.880077	12.8591	0.00616943	42.885	0.97343	19.0884	0.0149074	39.288		1	S	SVPGIPGPSSPQPVQSEAKMRLKAALTQQHP	X;X;X;X;X;X;X;X;X;X;X;X;X;X;X;Phospho (STY);X;X;X;X;X;X;X;X;X;X;X;X;X;X;X	PPPPPPPPPPPPPPPPPPPXXXXXXXXXXXX	0.000563318	53.342	39.288	_PVTMVPSVPGIPGPSSPQPVQS(ph)EAK_	PVTMVPS(0.003)VPGIPGPS(0.011)S(0.012)PQPVQS(0.973)EAK	PVT(-33.58)MVPS(-24.7)VPGIPGPS(-19.53)S(-19.09)PQPVQS(19.09)EAK	22	3	856.092	-0.092219	1.1566	1.1566	NaN	NaN	1.0667	1.0667	NaN	NaN	NaN
A2AQN4;A2AQN5;Q9QXG4;F7CU63	263;263;263;125	A2AQN4	A2AQN4	Acetyl-coenzyme A synthetase, cytoplasmic	Acss2;Acss2;Acss2;Acss2	>tr|A2AQN4|A2AQN4_MOUSE Acetyl-coenzyme A synthetase, cytoplasmic OS=Mus musculus GN=Acss2 PE=4 SV=1;>tr|A2AQN5|A2AQN5_MOUSE Acetyl-coenzyme A synthetase, cytoplasmic OS=Mus musculus GN=Acss2 PE=4 SV=1;>sp|Q9QXG4|ACSA_MOUSE Acetyl-coenzyme A synthetase, cy	0.998804	29.5044	0.998804	29.5044	2.40794e-40	202.6	0.994129	22.2913	2.13912e-31	180.31	0.994245	22.3756	5.5887e-31	174.65	0.996701	24.8019	4.45666e-119	259.77		1;2	S	IVVKHLGRAELGMNDSPSQSPPVKRPCPDVQ	X;X;X;X;X;X;X;X;X;X;X;X;Oxidation (M);X;X;Phospho (STY);X;X;X;Phospho (STY);X;X;X;X;X;X;X;X;X;X;X	XXXXXXXXPPPPPPPPPPPPPPPPXXXXXXX	4.45666e-119	259.77	163.45	_AELGMNDS(ph)PSQSPPVK_	AELGMNDS(0.999)PS(0.001)QSPPVK	AELGMNDS(29.5)PS(-29.5)QS(-41.16)PPVK	8	2	868.882	0.6002	0.60344	0.60344	1.2579	NaN	0.76681	0.76681	1.1249	NaN	NaN
A2AQN4;A2AQN5;Q9QXG4;F7CU63	265;265;265;127	A2AQN4	A2AQN4	Acetyl-coenzyme A synthetase, cytoplasmic	Acss2;Acss2;Acss2;Acss2	>tr|A2AQN4|A2AQN4_MOUSE Acetyl-coenzyme A synthetase, cytoplasmic OS=Mus musculus GN=Acss2 PE=4 SV=1;>tr|A2AQN5|A2AQN5_MOUSE Acetyl-coenzyme A synthetase, cytoplasmic OS=Mus musculus GN=Acss2 PE=4 SV=1;>sp|Q9QXG4|ACSA_MOUSE Acetyl-coenzyme A synthetase, cy	0.941094	13.8746	0.505733	0.96678	0.0108175	57.496	0.497557	0	0.000189091	103.9	0.610158	1.9664	0.0117574	93.381	0.941094	13.8746	3.97442e-22	160.45		1	S	VKHLGRAELGMNDSPSQSPPVKRPCPDVQGK	X;X;X;X;X;X;X;X;X;X;Oxidation (M);X;X;X;X;Phospho (STY);X;X;X;X;X;X;X;X;X;X;X;X;X;X;X	XXXXXXPPPPPPPPPPPPPPPPXXXXXXXXX	3.97442e-22	160.45	113.73	_AELGMNDSPS(ph)QSPPVK_	AELGMNDS(0.039)PS(0.941)QS(0.02)PPVK	AELGMNDS(-13.87)PS(13.87)QS(-16.65)PPVK	10	2	868.882	-0.18103	1.8607	1.8607	NaN	NaN	1.7634	1.7634	NaN	NaN	NaN
A2AQN4;A2AQN5;Q9QXG4;F7CU63	267;267;267;129	A2AQN4	A2AQN4	Acetyl-coenzyme A synthetase, cytoplasmic	Acss2;Acss2;Acss2;Acss2	>tr|A2AQN4|A2AQN4_MOUSE Acetyl-coenzyme A synthetase, cytoplasmic OS=Mus musculus GN=Acss2 PE=4 SV=1;>tr|A2AQN5|A2AQN5_MOUSE Acetyl-coenzyme A synthetase, cytoplasmic OS=Mus musculus GN=Acss2 PE=4 SV=1;>sp|Q9QXG4|ACSA_MOUSE Acetyl-coenzyme A synthetase, cy	0.999961	44.2283	0.998402	28.196	4.5962e-22	159.75	0.999947	42.9887	8.37885e-45	203.26	0.999666	34.7585	1.88026e-07	159.01	0.999961	44.2283	1.12754e-84	250.94		1;2	S	HLGRAELGMNDSPSQSPPVKRPCPDVQGKLR	X;X;X;X;X;X;X;X;Oxidation (M);X;X;Phospho (STY);X;X;X;Phospho (STY);X;X;X;X;X;X;X;X;X;X;X;X;X;X;X	XXXXPPPPPPPPPPPPPPPPXXXXXXXXXXX	1.12754e-84	250.94	194.92	_AELGMNDSPSQS(ph)PPVK_	AELGMNDSPSQS(1)PPVK	AELGMNDS(-58.43)PS(-44.23)QS(44.23)PPVK	12	2	868.882	-0.15479	0.81601	0.81601	1.2579	NaN	0.78818	0.78818	1.1249	NaN	NaN
A2AQN4;A2AQN5;Q9QXG4;D6RHA7	30;30;30;30	A2AQN4	A2AQN4	Acetyl-coenzyme A synthetase, cytoplasmic	Acss2;Acss2;Acss2;Acss2	>tr|A2AQN4|A2AQN4_MOUSE Acetyl-coenzyme A synthetase, cytoplasmic OS=Mus musculus GN=Acss2 PE=4 SV=1;>tr|A2AQN5|A2AQN5_MOUSE Acetyl-coenzyme A synthetase, cytoplasmic OS=Mus musculus GN=Acss2 PE=4 SV=1;>sp|Q9QXG4|ACSA_MOUSE Acetyl-coenzyme A synthetase, cy	1	90.6531	1	120.77	6.5548e-06	162.26	1	107.154	5.1518e-05	152.7	1	127.831	2.06699e-06	165.63	1	90.6531	7.88432e-05	150.46		1	S	RAREETGAEGRVRGWSPPPEVRRSAHVPSLQ	X;X;X;X;X;X;X;X;X;X;X;X;X;X;X;Phospho (STY);X;X;X;X;X;X;X;X;X;X;X;X;X;X;X	XXXXXXXXXXXXXPPPPPPPPPXXXXXXXXX	2.06699e-06	165.63	90.653	_GWS(ph)PPPEVR_	GWS(1)PPPEVR	GWS(90.65)PPPEVR	3	2	552.747	0.58743	0.73405	0.73405	NaN	NaN	0.86544	0.86544	NaN	NaN	NaN
A2AR02	354	A2AR02	A2AR02	Peptidyl-prolyl cis-trans isomerase G	Ppig	>sp|A2AR02|PPIG_MOUSE Peptidyl-prolyl cis-trans isomerase G OS=Mus musculus GN=Ppig PE=1 SV=1	1	141.095					1	100.687	0.0192139	142					1	141.095	0.0108453	152.54		2	S	YRTPSRSRSRDRFRRSETPPHWRQEMQRAQR	X;X;X;X;X;X;X;X;X;X;X;X;X;X;X;Phospho (STY);X;Phospho (STY);X;X;X;X;X;X;X;X;X;X;X;X;X	XXXXXXXXXXXXPPPPPPPPPPPXXXXXXXX	0.000874957	152.54	141.1	_S(ph)ET(ph)PPHWR_	S(1)ET(1)PPHWR	S(141.1)ET(141.1)PPHWR	1	2	585.212	0.15858	1.1524	NaN	1.1524	NaN	1.1164	NaN	1.1164	NaN	NaN
A2AR02	173	A2AR02	A2AR02	Peptidyl-prolyl cis-trans isomerase G	Ppig	>sp|A2AR02|PPIG_MOUSE Peptidyl-prolyl cis-trans isomerase G OS=Mus musculus GN=Ppig PE=1 SV=1	1	97.9113					1	79.659	0.00507563	79.659					1	97.9113	0.00119871	97.911		1	S	KTDAASKPFAEVRILSCGELIPKSKVKKEEK	X;X;X;X;X;X;X;X;X;X;X;X;X;X;X;Phospho (STY);X;X;X;X;X;X;X;X;X;X;X;X;X;X;X	XXXXXXXXXXXXXPPPPPPPPPPXXXXXXXX	0.00119871	97.911	97.911	_ILS(ph)CGELIPK_	ILS(1)CGELIPK	ILS(97.91)CGELIPK	3	2	605.301	0.15456	1.7014	1.7014	NaN	NaN	1.6929	1.6929	NaN	NaN	NaN
A2ARP1;A2ARP1-2;A2ARP1-3;F6RMX0;F6VID9;F7AST3;F6Q5C6	959;939;959;6;107;170;160	A2ARP1	A2ARP1	Inositol hexakisphosphate and diphosphoinositol-pentakisphosphate kinase 1	Ppip5k1;Ppip5k1;Ppip5k1;Ppip5k1;Ppip5k1	>sp|A2ARP1|VIP1_MOUSE Inositol hexakisphosphate and diphosphoinositol-pentakisphosphate kinase 1 OS=Mus musculus GN=Ppip5k1 PE=2 SV=1;>sp|A2ARP1-2|VIP1_MOUSE Isoform 2 of Inositol hexakisphosphate and diphosphoinositol-pentakisphosphate kinase 1 OS=Mus mus	0.97416	15.7633	0.959536	13.75	3.57663e-48	212.76					0.97416	15.7633	3.54759e-16	154.74	0.694153	3.55951	3.07914e-31	178.77		1	S	CPGKASDEPDRALQTSPQPVEGTGLPRRSPL	X;X;X;X;X;X;X;X;X;X;X;X;X;X;X;Phospho (STY);X;X;X;X;X;X;X;X;X;X;X;X;X;X;X	XXXXXXXXXXXPPPPPPPPPPPPPPPPXXXX	3.57663e-48	212.76	154.74	_ALQTS(ph)PQPVEGTGLPR_	ALQT(0.026)S(0.974)PQPVEGTGLPR	ALQT(-15.76)S(15.76)PQPVEGT(-83.94)GLPR	5	2	865.927	0.15066	0.992	0.992	NaN	NaN	0.99494	0.99494	NaN	NaN	NaN
A2ARP8;Q9QYR6-2;Q9QYR6	1844;1830;1606	A2ARP8	A2ARP8	Microtubule-associated protein 1A;MAP1 light chain LC2	Mtap1a;Map1a	>tr|A2ARP8|A2ARP8_MOUSE Microtubule-associated protein 1 A OS=Mus musculus GN=Mtap1a PE=4 SV=1;>sp|Q9QYR6-2|MAP1A_MOUSE Isoform 2 of Microtubule-associated protein 1A OS=Mus musculus GN=Map1a;>sp|Q9QYR6|MAP1A_MOUSE Microtubule-associated protein 1A OS=Mus	1	226.929	1	185.27	3.12618e-26	209.56	1	226.929	4.59297e-85	253.46	1	238.022	1.52488e-56	238.02	1	226.929	6.34809e-71	249.6		1	S	DGAVPEKTRALGLEESPEEEGKAREQEEKYW	X;X;X;X;X;X;X;X;X;X;X;X;X;X;X;Phospho (STY);X;X;X;X;X;X;X;X;X;X;X;X;X;X;X	XXXXXXXXXPPPPPPPPPPPPPXXXXXXXXX	4.59297e-85	253.46	226.93	_ALGLEES(ph)PEEEGK_	ALGLEES(1)PEEEGK	ALGLEES(226.93)PEEEGK	7	2	734.316	-0.35849	0.81593	0.81593	NaN	NaN	0.94664	0.94664	NaN	NaN	1.0801
A2ARP8;Q9QYR6-2;Q9QYR6	1219;1205;981	A2ARP8	A2ARP8	Microtubule-associated protein 1A;MAP1 light chain LC2	Mtap1a;Map1a	>tr|A2ARP8|A2ARP8_MOUSE Microtubule-associated protein 1 A OS=Mus musculus GN=Mtap1a PE=4 SV=1;>sp|Q9QYR6-2|MAP1A_MOUSE Isoform 2 of Microtubule-associated protein 1A OS=Mus musculus GN=Map1a;>sp|Q9QYR6|MAP1A_MOUSE Microtubule-associated protein 1A OS=Mus	1	96.095	1	97.4557	1.09143e-15	197.07	1	119.375	3.38633e-16	201	1	95.3446	1.76686e-05	160.52	1	96.095	1.21586e-27	222.25		1	S	HPGEPALGEVEERCLSPDDSTVKMASPPPSG	X;X;X;X;X;X;X;X;X;X;X;X;X;X;X;Phospho (STY);X;X;X;X;X;X;X;Oxidation (M);X;Phospho (STY);X;X;X;X;X	XXXXXXXXXXXXXPPPPPPPPPPXXXXXXXX	1.21586e-27	222.25	188.96	_CLS(ph)PDDSTVK_	CLS(1)PDDSTVK	CLS(96.09)PDDS(-96.09)T(-96.09)VK	3	2	601.244	-0.042517	0.87684	0.87684	NaN	NaN	1.1426	1.1426	NaN	NaN	NaN
A2ARP8;Q9QYR6-2;Q9QYR6	1818;1804;1580	A2ARP8	A2ARP8	Microtubule-associated protein 1A;MAP1 light chain LC2	Mtap1a;Map1a	>tr|A2ARP8|A2ARP8_MOUSE Microtubule-associated protein 1 A OS=Mus musculus GN=Mtap1a PE=4 SV=1;>sp|Q9QYR6-2|MAP1A_MOUSE Isoform 2 of Microtubule-associated protein 1A OS=Mus musculus GN=Map1a;>sp|Q9QYR6|MAP1A_MOUSE Microtubule-associated protein 1A OS=Mus	1	76.5012	1	88.5318	4.90176e-22	207.97	1	67.3289	6.32306e-07	181.71	1	101.887	4.66748e-29	215.51	1	76.5012	9.37946e-30	220.4		1	S	EDKSTTPKEMTLDQKSPEKAKGVEQQDGAVP	X;X;X;X;X;X;X;X;X;Oxidation (M);X;X;X;X;X;Phospho (STY);X;X;X;X;X;X;X;X;X;X;X;X;X;X;X	XXXXXXXXPPPPPPPPPPPXXXXXXXXXXXX	9.37946e-30	220.4	198.85	_EMTLDQKS(ph)PEK_	EMTLDQKS(1)PEK	EMT(-76.5)LDQKS(76.5)PEK	8	2	693.305	-0.0027416	0.83887	0.83887	NaN	NaN	0.93673	0.93673	NaN	NaN	NaN
A2ARP8;Q9QYR6-2;Q9QYR6	1872;1858;1634	A2ARP8	A2ARP8	Microtubule-associated protein 1A;MAP1 light chain LC2	Mtap1a;Map1a	>tr|A2ARP8|A2ARP8_MOUSE Microtubule-associated protein 1 A OS=Mus musculus GN=Mtap1a PE=4 SV=1;>sp|Q9QYR6-2|MAP1A_MOUSE Isoform 2 of Microtubule-associated protein 1A OS=Mus musculus GN=Map1a;>sp|Q9QYR6|MAP1A_MOUSE Microtubule-associated protein 1A OS=Mus	0.924781	11.2686	0.879707	9.42719	0.000122772	123.59	0.924781	11.2686	3.67935e-06	130.01	0.916123	11.7312	3.33606e-07	133.93	0.904119	10.2666	1.97471e-22	162.77		1	S	KYWKEQDVVQGWRETSPTRGEPVPAWEGKSP	X;X;X;X;X;X;X;X;X;X;X;X;X;X;X;Phospho (STY);X;X;X;X;X;X;X;X;X;X;X;X;X;Phospho (STY);X	XXXXXXXXXXXXXPPPPPPPPPPPPPPPPXX	1.97471e-22	162.77	77.42	_ETS(ph)PTRGEPVPAWEGK_	ET(0.006)S(0.925)PT(0.069)RGEPVPAWEGK	ET(-21.76)S(11.27)PT(-11.27)RGEPVPAWEGK	3	2	910.914	0.56127	0.57589	0.57589	NaN	NaN	0.57139	0.57139	NaN	NaN	NaN
A2ARP8;Q9QYR6-2;Q9QYR6	1886;1872;1648	A2ARP8	A2ARP8	Microtubule-associated protein 1A;MAP1 light chain LC2	Mtap1a;Map1a	>tr|A2ARP8|A2ARP8_MOUSE Microtubule-associated protein 1 A OS=Mus musculus GN=Mtap1a PE=4 SV=1;>sp|Q9QYR6-2|MAP1A_MOUSE Isoform 2 of Microtubule-associated protein 1A OS=Mus musculus GN=Map1a;>sp|Q9QYR6|MAP1A_MOUSE Microtubule-associated protein 1A OS=Mus	1	135.211	1	97.5699	6.28073e-05	97.57	1	58.4793	7.86854e-05	95.981	1	43.6903	0.000125713	91.276	1	135.211	2.29624e-08	135.21		1	S	TSPTRGEPVPAWEGKSPEQEVRYWRDRDITL	Phospho (STY);Phospho (STY);X;Phospho (STY);X;X;X;X;X;X;X;X;X;X;X;Phospho (STY);X;X;X;X;X;X;X;X;X;X;X;X;X;X;X	XXXXXPPPPPPPPPPPPPPPPPXXXXXXXXX	2.29624e-08	135.21	135.21	_GEPVPAWEGKS(ph)PEQEVR_	GEPVPAWEGKS(1)PEQEVR	GEPVPAWEGKS(135.21)PEQEVR	11	2	987.951	0.38656	0.94284	0.94284	NaN	NaN	0.99243	0.99243	NaN	NaN	NaN
A2ARP8;Q9QYR6-2;Q9QYR6	1146;1132;908	A2ARP8	A2ARP8	Microtubule-associated protein 1A;MAP1 light chain LC2	Mtap1a;Map1a	>tr|A2ARP8|A2ARP8_MOUSE Microtubule-associated protein 1 A OS=Mus musculus GN=Mtap1a PE=4 SV=1;>sp|Q9QYR6-2|MAP1A_MOUSE Isoform 2 of Microtubule-associated protein 1A OS=Mus musculus GN=Map1a;>sp|Q9QYR6|MAP1A_MOUSE Microtubule-associated protein 1A OS=Mus	1	66.0044					1	66.0044	6.58249e-05	98.74					0.998759	32.5799	0.00963267	52.045		1	S	TISPTSSLEEDKGFKSPPCEDFSVTGESEKK	X;X;X;X;X;X;X;X;X;X;X;X;X;X;X;Phospho (STY);X;X;X;X;X;X;X;X;X;X;X;X;X;X;X	XXXXXXXXXXXXPPPPPPPPPPPPPPPPPPX	6.58249e-05	98.74	98.74	_GFKS(ph)PPCEDFSVTGESEK_	GFKS(1)PPCEDFSVTGESEK	GFKS(66)PPCEDFS(-66)VT(-75.23)GES(-82.47)EK	4	2	1040.93	-0.12478	0.74379	0.74379	NaN	NaN	0.90246	0.90246	NaN	NaN	NaN
A2ARP8;Q9QYR6-2;Q9QYR6	1527;1513;1289	A2ARP8	A2ARP8	Microtubule-associated protein 1A;MAP1 light chain LC2	Mtap1a;Map1a	>tr|A2ARP8|A2ARP8_MOUSE Microtubule-associated protein 1 A OS=Mus musculus GN=Mtap1a PE=4 SV=1;>sp|Q9QYR6-2|MAP1A_MOUSE Isoform 2 of Microtubule-associated protein 1A OS=Mus musculus GN=Map1a;>sp|Q9QYR6|MAP1A_MOUSE Microtubule-associated protein 1A OS=Mus	0.997773	26.7106													0.997773	26.7106	0.00164693	50.938		1	S	GSSFSHSALSGDRKHSPGEITGPGGHFMTSD	X;X;X;X;X;X;X;X;X;X;X;X;X;X;X;Phospho (STY);X;X;X;X;X;X;X;X;X;X;X;Oxidation (M);X;X;X	XXXXXXXXXXXXXPPPPPPPPPPPPPPPPPP	0.00164693	50.938	50.938	_KHS(ph)PGEITGPGGHFM(ox)TSDSSLTK_	KHS(0.998)PGEIT(0.002)GPGGHFMTSDSSLTK	KHS(26.71)PGEIT(-26.71)GPGGHFMT(-47.04)S(-47.04)DS(-47.04)S(-47.04)LT(-47.04)K	3	4	617.529	0.13889	0.86257	0.86257	NaN	NaN	0.80801	0.80801	NaN	NaN	NaN
A2ARP8;Q9QYR6-2;Q9QYR6	1229;1215;991	A2ARP8	A2ARP8	Microtubule-associated protein 1A;MAP1 light chain LC2	Mtap1a;Map1a	>tr|A2ARP8|A2ARP8_MOUSE Microtubule-associated protein 1 A OS=Mus musculus GN=Mtap1a PE=4 SV=1;>sp|Q9QYR6-2|MAP1A_MOUSE Isoform 2 of Microtubule-associated protein 1A OS=Mus musculus GN=Map1a;>sp|Q9QYR6|MAP1A_MOUSE Microtubule-associated protein 1A OS=Mus	0.999554	33.9916	0.998958	31.2095	0.000116781	59.574	0.999354	32.5745	1.878e-16	104.86	0.999554	33.9916	1.81776e-07	72.755	0.999395	32.856	1.67224e-16	110.33		1;2	S	EERCLSPDDSTVKMASPPPSGPPSAAHTPFH	X;X;X;X;X;Phospho (STY);X;X;X;X;X;X;X;Oxidation (M);X;Phospho (STY);X;X;X;X;X;X;X;X;X;X;X;Phospho (STY);X;X;X	XXXXXXXXXXXXXPPPPPPPPPPPPPPPPPP	1.67224e-16	110.33	64.422	_MAS(ph)PPPSGPPSAAHT(ph)PFHQSPVEEK_	MAS(1)PPPSGPPSAAHT(0.5)PFHQS(0.5)PVEEK	MAS(33.99)PPPS(-33.99)GPPS(-33.11)AAHT(0)PFHQS(0)PVEEK	3	3	915.059	-0.22618	0.78037	0.78037	2.493	NaN	0.79479	0.79479	2.5276	NaN	NaN
A2ARP8;Q9QYR6-2;Q9QYR6	1246;1232;1008	A2ARP8	A2ARP8	Microtubule-associated protein 1A;MAP1 light chain LC2	Mtap1a;Map1a	>tr|A2ARP8|A2ARP8_MOUSE Microtubule-associated protein 1 A OS=Mus musculus GN=Mtap1a PE=4 SV=1;>sp|Q9QYR6-2|MAP1A_MOUSE Isoform 2 of Microtubule-associated protein 1A OS=Mus musculus GN=Map1a;>sp|Q9QYR6|MAP1A_MOUSE Microtubule-associated protein 1A OS=Mus	0.786008	6.10749					0.509605	0.759064	0.0314109	33.833	0.786008	6.10749	0.000207388	64.422						1;2	S	PPSGPPSAAHTPFHQSPVEEKSEPQDFQEDS	X;X;X;X;X;X;X;X;X;X;X;X;X;X;X;Phospho (STY);X;X;X;X;X;X;X;X;X;X;X;X;X;X;X	PPPPPPPPPPPPPPPPPPPPPXXXXXXXXXX	0.000207388	64.422	41.483	_MAS(ph)PPPSGPPSAAHTPFHQS(ph)PVEEK_	MAS(0.986)PPPS(0.014)GPPS(0.019)AAHT(0.194)PFHQS(0.786)PVEEK	MAS(19.51)PPPS(-19.51)GPPS(-16.43)AAHT(-6.11)PFHQS(6.11)PVEEK	20	3	915.059	-0.013716	0.89233	0.89233	2.3686	NaN	1.0163	1.0163	2.4016	NaN	NaN
A2ARP8;Q9QYR6-2;Q9QYR6	2000;1986;1762	A2ARP8	A2ARP8	Microtubule-associated protein 1A;MAP1 light chain LC2	Mtap1a;Map1a	>tr|A2ARP8|A2ARP8_MOUSE Microtubule-associated protein 1 A OS=Mus musculus GN=Mtap1a PE=4 SV=1;>sp|Q9QYR6-2|MAP1A_MOUSE Isoform 2 of Microtubule-associated protein 1A OS=Mus musculus GN=Map1a;>sp|Q9QYR6|MAP1A_MOUSE Microtubule-associated protein 1A OS=Mus	1	84.2752					1	84.2752	1.85009e-07	123.19										1	S	SPVGLPPEEEDKLTRSPFEIISPPASPPEMT	Phospho (STY);X;X;X;X;X;X;X;X;X;X;X;X;X;X;Phospho (STY);X;X;X;X;X;X;X;X;X;X;X;X;X;X;X	XXXXXXXXXXXXXXXPPPPPPPPPPPPPPPP	1.85009e-07	123.19	123.19	_S(ph)PFEIISPPASPPEMTGQR_	S(1)PFEIISPPASPPEMTGQR	S(84.28)PFEIIS(-84.28)PPAS(-105.72)PPEMT(-110.89)GQR	1	2	1060.99	-0.91999	1.1032	1.1032	NaN	NaN	1.3567	1.3567	NaN	NaN	NaN
A2ARP8;Q9QYR6-2;Q9QYR6	2006;1992;1768	A2ARP8	A2ARP8	Microtubule-associated protein 1A;MAP1 light chain LC2	Mtap1a;Map1a	>tr|A2ARP8|A2ARP8_MOUSE Microtubule-associated protein 1 A OS=Mus musculus GN=Mtap1a PE=4 SV=1;>sp|Q9QYR6-2|MAP1A_MOUSE Isoform 2 of Microtubule-associated protein 1A OS=Mus musculus GN=Map1a;>sp|Q9QYR6|MAP1A_MOUSE Microtubule-associated protein 1A OS=Mus	1	77.8855					1	64.5821	1.49268e-71	195.15					1	77.8855	1.24773e-71	196.4		2	S	PEEEDKLTRSPFEIISPPASPPEMTGQRVPS	X;X;X;X;X;X;X;X;X;X;X;X;X;X;X;Phospho (STY);X;X;X;Phospho (STY);X;X;X;Oxidation (M);X;X;X;X;X;X;X	XXXXXXXXXPPPPPPPPPPPPPPPPPPPXXX	1.24773e-71	196.4	196.4	_SPFEIIS(ph)PPAS(ph)PPEMTGQR_	SPFEIIS(1)PPAS(1)PPEMTGQR	S(-77.89)PFEIIS(77.89)PPAS(64.63)PPEMT(-64.63)GQR	7	2	1100.97	0.35487	0.82961	NaN	0.82961	NaN	0.85958	NaN	0.85958	NaN	NaN
A2ARP8;Q9QYR6-2;Q9QYR6	2010;1996;1772	A2ARP8	A2ARP8	Microtubule-associated protein 1A;MAP1 light chain LC2	Mtap1a;Map1a	>tr|A2ARP8|A2ARP8_MOUSE Microtubule-associated protein 1 A OS=Mus musculus GN=Mtap1a PE=4 SV=1;>sp|Q9QYR6-2|MAP1A_MOUSE Isoform 2 of Microtubule-associated protein 1A OS=Mus musculus GN=Map1a;>sp|Q9QYR6|MAP1A_MOUSE Microtubule-associated protein 1A OS=Mus	1	64.6261					0.999905	40.2031	1.49268e-71	195.15					1	64.6261	1.24773e-71	196.4		2	S	DKLTRSPFEIISPPASPPEMTGQRVPSAPGQ	X;X;X;X;X;X;X;X;X;X;X;Phospho (STY);X;X;X;Phospho (STY);X;X;X;Oxidation (M);X;X;X;X;X;X;X;X;X;X;X	XXXXXPPPPPPPPPPPPPPPPPPPXXXXXXX	1.24773e-71	196.4	196.4	_SPFEIIS(ph)PPAS(ph)PPEMTGQR_	SPFEIIS(1)PPAS(1)PPEMTGQR	S(-77.89)PFEIIS(77.89)PPAS(64.63)PPEMT(-64.63)GQR	11	2	1100.97	0.35487	0.82961	NaN	0.82961	NaN	0.85958	NaN	0.85958	NaN	NaN
A2ARP8;Q9QYR6-2;Q9QYR6	1300;1286;1062	A2ARP8	A2ARP8	Microtubule-associated protein 1A;MAP1 light chain LC2	Mtap1a;Map1a	>tr|A2ARP8|A2ARP8_MOUSE Microtubule-associated protein 1 A OS=Mus musculus GN=Mtap1a PE=4 SV=1;>sp|Q9QYR6-2|MAP1A_MOUSE Isoform 2 of Microtubule-associated protein 1A OS=Mus musculus GN=Map1a;>sp|Q9QYR6|MAP1A_MOUSE Microtubule-associated protein 1A OS=Mus	0.941353	12.4832					0.781561	6.14962	2.7169e-55	162.83					0.941353	12.4832	3.05287e-19	90.912		1	S	PEEAMSEEGKVPLSRSPQAQDTLGSLAGGQT	X;X;X;X;X;X;X;X;X;X;X;X;X;X;X;Phospho (STY);X;X;X;X;X;X;X;X;X;X;X;X;X;X;X	XXXXXXXXXXXXXXXPPPPPPPPPPPPPPPP	2.7169e-55	162.83	90.912	_S(ph)PQAQDTLGSLAGGQTGCTIQLLPEQDK_	S(0.941)PQAQDT(0.053)LGS(0.005)LAGGQTGCTIQLLPEQDK	S(12.48)PQAQDT(-12.48)LGS(-22.47)LAGGQT(-50.23)GCT(-37.65)IQLLPEQDK	1	3	998.469	0.2027	0.97081	0.97081	NaN	NaN	1.2125	1.2125	NaN	NaN	1.6071
A2ARP8;Q9QYR6-2;Q9QYR6	2027;2013;1789	A2ARP8	A2ARP8	Microtubule-associated protein 1A;MAP1 light chain LC2	Mtap1a;Map1a	>tr|A2ARP8|A2ARP8_MOUSE Microtubule-associated protein 1 A OS=Mus musculus GN=Mtap1a PE=4 SV=1;>sp|Q9QYR6-2|MAP1A_MOUSE Isoform 2 of Microtubule-associated protein 1A OS=Mus musculus GN=Map1a;>sp|Q9QYR6|MAP1A_MOUSE Microtubule-associated protein 1A OS=Mus	1	111.708	1	81.8951	6.99673e-112	260.96	1	100.092	1.55027e-130	271.64	1	104.724	8.10389e-55	237.73	1	111.708	1.55027e-130	271.64		1	S	PEMTGQRVPSAPGQESPVPDTKSTPPTRNEP	X;X;Oxidation (M);X;X;X;X;X;X;X;X;X;X;X;X;Phospho (STY);X;X;X;X;X;X;X;X;X;X;X;X;X;X;X	XXXXXXXPPPPPPPPPPPPPPPXXXXXXXXX	1.55027e-130	271.64	258.8	_VPSAPGQES(ph)PVPDTK_	VPSAPGQES(1)PVPDTK	VPS(-113.47)APGQES(111.71)PVPDT(-111.71)K	9	2	794.866	-0.28635	0.78799	0.78799	NaN	NaN	0.97297	0.97297	NaN	NaN	1.0877
A2ARV4	4624	A2ARV4	A2ARV4	Low-density lipoprotein receptor-related protein 2	Lrp2	>sp|A2ARV4|LRP2_MOUSE Low-density lipoprotein receptor-related protein 2 OS=Mus musculus GN=Lrp2 PE=1 SV=1	0.989628	19.7961	0.989628	19.7961	2.37996e-10	141.6					0.955767	13.3461	0.000168139	108.75						1	S	MDTEQKEAVAVAPPPSPSLPAKASKRSSTPG	X;X;X;X;X;X;X;X;X;X;X;X;X;X;X;Phospho (STY);X;X;X;X;X;X;X;X;X;X;X;X;X;X;X	XXXXXXPPPPPPPPPPPPPPPPXXXXXXXXX	2.37996e-10	141.6	117.3	_EAVAVAPPPS(ph)PSLPAK_	EAVAVAPPPS(0.99)PS(0.01)LPAK	EAVAVAPPPS(19.8)PS(-19.8)LPAK	10	2	805.913	0.94668	1.2657	1.2657	NaN	NaN	1.5533	1.5533	NaN	NaN	NaN
A2ARV4	4626	A2ARV4	A2ARV4	Low-density lipoprotein receptor-related protein 2	Lrp2	>sp|A2ARV4|LRP2_MOUSE Low-density lipoprotein receptor-related protein 2 OS=Mus musculus GN=Lrp2 PE=1 SV=1	0.977545	16.3883	0.5	0	0.0333755	46.408	0.60638	1.87667	0.00270004	110.37	0.977545	16.3883	1.13681e-06	127.32						1	S	TEQKEAVAVAPPPSPSLPAKASKRSSTPGYT	X;X;X;X;X;X;X;X;X;X;X;X;X;X;X;Phospho (STY);X;X;X;X;X;X;X;X;X;X;X;X;X;X;X	XXXXPPPPPPPPPPPPPPPPXXXXXXXXXXX	1.13681e-06	127.32	115.06	_EAVAVAPPPSPS(ph)LPAK_	EAVAVAPPPS(0.022)PS(0.978)LPAK	EAVAVAPPPS(-16.39)PS(16.39)LPAK	12	2	805.913	0.46124	1.2905	1.2905	NaN	NaN	1.2434	1.2434	NaN	NaN	NaN
Q68FH0;A2AS45;Q68FH0-2;A2AS47	1015;1031;1015;674	Q68FH0;A2AS47	Q68FH0	Plakophilin-4	Pkp4;Pkp4;Pkp4	>sp|Q68FH0|PKP4_MOUSE Plakophilin-4 OS=Mus musculus GN=Pkp4 PE=1 SV=1;>tr|A2AS45|A2AS45_MOUSE Plakophilin 4 OS=Mus musculus GN=Pkp4 PE=4 SV=1;>sp|Q68FH0-2|PKP4_MOUSE Isoform 2 of Plakophilin-4 OS=Mus musculus GN=Pkp4;>tr|A2AS47|A2AS47_MOUSE Plakophilin 4 O	0.499999	0					0.499999	0	0.000138729	89.466										1	S	YKKDGWNQNHFITPVSTLERDRFKSHPSLST	X;X;X;X;X;X;X;X;X;X;X;X;X;X;X;Phospho (STY);X;X;X;X;X;X;X;X;X;X;X;X;X;X;X	XXXPPPPPPPPPPPPPPPPPXXXXXXXXXXX	0.000138729	89.466	85.909	_DGWNQNHFITPVS(ph)TLER_	DGWNQNHFITPVS(0.5)T(0.5)LER	DGWNQNHFIT(-55.74)PVS(0)T(0)LER	13	3	698.653	0.14246	1.1575	1.1575	NaN	NaN	1.4043	1.4043	NaN	NaN	NaN
Q68FH0;A2AS45;Q68FH0-2;A2AS44	334;334;334;334	Q68FH0	Q68FH0	Plakophilin-4	Pkp4;Pkp4;Pkp4	>sp|Q68FH0|PKP4_MOUSE Plakophilin-4 OS=Mus musculus GN=Pkp4 PE=1 SV=1;>tr|A2AS45|A2AS45_MOUSE Plakophilin 4 OS=Mus musculus GN=Pkp4 PE=4 SV=1;>sp|Q68FH0-2|PKP4_MOUSE Isoform 2 of Plakophilin-4 OS=Mus musculus GN=Pkp4;>tr|A2AS44|A2AS44_MOUSE Plakophilin 4 (	0.431178	0													0.431178	0	0.000288561	104.21			S	DAQTRVASPSQGQVGSSSPKRSGMTAVPQHL	X;X;X;X;X;X;X;X;X;X;X;X;X;X;X;Phospho (STY);X;X;X;X;X;X;X;X;X;X;X;X;X;X;X	XXXXXPPPPPPPPPPPPPPPXXXXXXXXXXX	0.000288561	104.21	104.21	_VASPSQGQVGS(ph)SSPK_	VASPS(0.037)QGQVGS(0.431)S(0.431)S(0.101)PK	VAS(-47.39)PS(-10.71)QGQVGS(0)S(0)S(-6.3)PK	11	2	748.343	-1.0689
Q68FH0;A2AS45;Q68FH0-2;A2AS44	335;335;335;335	Q68FH0	Q68FH0	Plakophilin-4	Pkp4;Pkp4;Pkp4	>sp|Q68FH0|PKP4_MOUSE Plakophilin-4 OS=Mus musculus GN=Pkp4 PE=1 SV=1;>tr|A2AS45|A2AS45_MOUSE Plakophilin 4 OS=Mus musculus GN=Pkp4 PE=4 SV=1;>sp|Q68FH0-2|PKP4_MOUSE Isoform 2 of Plakophilin-4 OS=Mus musculus GN=Pkp4;>tr|A2AS44|A2AS44_MOUSE Plakophilin 4 (	0.431178	0													0.431178	0	0.000288561	104.21			S	AQTRVASPSQGQVGSSSPKRSGMTAVPQHLG	X;X;X;X;X;X;X;X;X;X;X;X;X;X;X;X;X;X;X;X;X;X;X;X;X;X;X;X;X;X;X	XXXXXXXXXXXXXXXXXXXXXXXXXXXXXXX	0.000288561	104.21	104.21	_VASPSQGQVGS(ph)SSPK_	VASPS(0.037)QGQVGS(0.431)S(0.431)S(0.101)PK	VAS(-47.39)PS(-10.71)QGQVGS(0)S(0)S(-6.3)PK	12	2	748.343	-1.0689
Q68FH0;A2AS45;Q68FH0-2;A2AS44	336;336;336;336	Q68FH0	Q68FH0	Plakophilin-4	Pkp4;Pkp4;Pkp4	>sp|Q68FH0|PKP4_MOUSE Plakophilin-4 OS=Mus musculus GN=Pkp4 PE=1 SV=1;>tr|A2AS45|A2AS45_MOUSE Plakophilin 4 OS=Mus musculus GN=Pkp4 PE=4 SV=1;>sp|Q68FH0-2|PKP4_MOUSE Isoform 2 of Plakophilin-4 OS=Mus musculus GN=Pkp4;>tr|A2AS44|A2AS44_MOUSE Plakophilin 4 (	0.999	29.9946	0.999	29.9946	4.65844e-22	173.28	0.996964	26.186	4.05143e-21	160.64	0.992058	21.1135	3.7555e-15	152.94	0.957995	13.6263	2.86956e-21	165.58		1	S	QTRVASPSQGQVGSSSPKRSGMTAVPQHLGP	X;X;X;X;X;X;X;X;X;X;X;X;X;X;X;Phospho (STY);X;X;X;X;X;X;X;X;X;X;X;X;X;X;X	XXXPPPPPPPPPPPPPPPPXXXXXXXXXXXX	4.65844e-22	173.28	173.28	_VASPSQGQVGSSS(ph)PK_	VASPSQGQVGSS(0.001)S(0.999)PK	VAS(-129.32)PS(-98.14)QGQVGS(-69.02)S(-29.99)S(29.99)PK	13	2	748.343	-0.20778	0.88891	0.88891	NaN	NaN	0.8986	0.8986	NaN	NaN	NaN
Q68FH0;A2AS45;Q68FH0-2;A2AS44	313;313;313;313	Q68FH0	Q68FH0	Plakophilin-4	Pkp4;Pkp4;Pkp4	>sp|Q68FH0|PKP4_MOUSE Plakophilin-4 OS=Mus musculus GN=Pkp4 PE=1 SV=1;>tr|A2AS45|A2AS45_MOUSE Plakophilin 4 OS=Mus musculus GN=Pkp4 PE=4 SV=1;>sp|Q68FH0-2|PKP4_MOUSE Isoform 2 of Plakophilin-4 OS=Mus musculus GN=Pkp4;>tr|A2AS44|A2AS44_MOUSE Plakophilin 4 (	0.999995	52.8293	0.999955	43.5457	0.000328284	108.63	0.999995	52.8293	0.0271128	111.64	0.999983	47.6859	0.0022054	115.1	0.999942	42.4068	2.09937e-09	166.3		1	S	PNGPVPQYQTTTRVGSPLTLTDAQTRVASPS	X;X;X;X;X;X;X;X;X;X;X;X;X;X;X;Phospho (STY);X;X;X;X;X;X;X;X;X;X;X;X;X;X;X	XXXXXXXXXXXXXPPPPPPPPPPPPPXXXXX	2.09937e-09	166.3	111.64	_VGS(ph)PLTLTDAQTR_	VGS(1)PLTLTDAQTR	VGS(52.83)PLT(-52.83)LT(-76.17)DAQT(-100.27)R	3	2	719.851	-0.59496	0.95934	0.95934	NaN	NaN	1.1676	1.1676	NaN	NaN	NaN
O54826;A2AS70;A2AS72	691;613;148	O54826	O54826	Protein AF-10	Mllt10;Mllt10;Mllt10	>sp|O54826|AF10_MOUSE Protein AF-10 OS=Mus musculus GN=Mllt10 PE=1 SV=2;>tr|A2AS70|A2AS70_MOUSE Myeloid/lymphoid or mixed lineage-leukemia translocation to 10 homolog (Drosophila) OS=Mus musculus GN=Mllt10 PE=4 SV=1;>tr|A2AS72|A2AS72_MOUSE Myeloid/lymphoid	1	79.3448	1	87.0701	1.69526e-06	169.52	1	79.3448	6.26042e-05	151.79	1	79.9618	6.41032e-05	134.3	1	69.8089	1.60488e-05	156.58		1	S	LGGRGSSPRGSLSPRSPVSNLQLRYDQPSNS	X;X;X;X;X;X;X;X;X;X;X;X;X;X;X;Phospho (STY);X;X;X;X;X;X;X;X;X;X;X;X;X;X;X	XXXXXXXXXXXXXXXPPPPPPPPPXXXXXXX	1.69526e-06	169.52	138.76	_S(ph)PVSNLQLR_	S(1)PVSNLQLR	S(79.34)PVS(-79.34)NLQLR	1	2	547.274	-0.15685	0.88525	0.88525	NaN	NaN	0.97985	0.97985	NaN	NaN	NaN
A2ASS6;A2ASS6-2;E9Q8K5;E9Q8N1	31839;23512;30093;30093	A2ASS6;E9Q8K5	E9Q8K5	Titin	Ttn;Ttn;Ttn	>sp|A2ASS6|TITIN_MOUSE Titin OS=Mus musculus GN=Ttn PE=1 SV=1;>sp|A2ASS6-2|TITIN_MOUSE Isoform 2 of Titin OS=Mus musculus GN=Ttn;>tr|E9Q8K5|E9Q8K5_MOUSE Titin OS=Mus musculus GN=Ttn PE=4 SV=1;>tr|E9Q8N1|E9Q8N1_MOUSE Titin OS=Mus musculus GN=Ttn PE=4 SV=1	0.887035	12.1622	0.834989	8.09957	0.00485244	62.203	0.787475	6.96454	0.018031	71.263					0.887035	12.1622	0.000692223	79.013		1	S	KPQNPRVTDTTRTSVSLAWSVPEDEGGSKVT	X;X;X;X;X;X;X;X;X;X;X;X;X;X;X;Phospho (STY);X;X;X;X;X;X;X;X;X;X;X;X;X;X;X	XXXXXXXXXXXXPPPPPPPPPPPPPPPPPXX	0.000692223	79.013	61.87	_TSVS(ph)LAWSVPEDEGGSK_	T(0.054)S(0.054)VS(0.887)LAWS(0.003)VPEDEGGS(0.002)K	T(-12.16)S(-12.16)VS(12.16)LAWS(-25.13)VPEDEGGS(-25.66)K	4	2	914.904	-0.18976	0.92363	0.92363	NaN	NaN	0.94621	0.94621	NaN	NaN	NaN
A2ASS6;A2ASS6-2;E9Q8K5;E9Q8N1	31851;23524;30105;30105	A2ASS6;E9Q8K5	E9Q8K5	Titin	Ttn;Ttn;Ttn	>sp|A2ASS6|TITIN_MOUSE Titin OS=Mus musculus GN=Ttn PE=1 SV=1;>sp|A2ASS6-2|TITIN_MOUSE Isoform 2 of Titin OS=Mus musculus GN=Ttn;>tr|E9Q8K5|E9Q8K5_MOUSE Titin OS=Mus musculus GN=Ttn PE=4 SV=1;>tr|E9Q8N1|E9Q8N1_MOUSE Titin OS=Mus musculus GN=Ttn PE=4 SV=1	0.976288	18.8172	0.517284	5.14505	0.0336896	43.598	0.976288	18.8172	0.00255422	68.525	0.74513	7.6568	0.00562466	82.449						1	S	TSVSLAWSVPEDEGGSKVTGYLIEMQKVDQR	X;X;X;X;X;X;X;X;X;X;X;X;X;X;X;Phospho (STY);X;X;X;X;X;X;X;X;X;X;X;X;X;X;X	PPPPPPPPPPPPPPPPPXXXXXXXXXXXXXX	0.00255422	82.449	68.525	_TSVSLAWSVPEDEGGS(ph)K_	T(0.002)S(0.002)VS(0.007)LAWS(0.013)VPEDEGGS(0.976)K	T(-27.27)S(-27.27)VS(-21.3)LAWS(-18.82)VPEDEGGS(18.82)K	16	2	914.904	0.56649	0.88734	0.88734	NaN	NaN	1.1008	1.1008	NaN	NaN	NaN
Q5HZG4;A2ASY0	243;90	Q5HZG4	Q5HZG4	Transcription initiation factor TFIID subunit 3	Taf3;Taf3	>sp|Q5HZG4|TAF3_MOUSE Transcription initiation factor TFIID subunit 3 OS=Mus musculus GN=Taf3 PE=1 SV=2;>tr|A2ASY0|A2ASY0_MOUSE TAF3 RNA polymerase II, TATA box binding protein (TBP)-associated factor OS=Mus musculus GN=Taf3 PE=4 SV=1	1	80.2359	1	63.2246	0.0033782	63.225	1	48.3544	9.54743e-05	95.227	1	92.9766	2.06045e-05	108.45	1	80.2359	0.000474867	80.236		1	S	LSPVRVQDRADLAPPSPQPPMLAPFAKSQLP	X;Phospho (STY);X;X;X;X;X;X;X;X;X;X;X;X;X;Phospho (STY);X;X;X;X;X;X;X;X;X;X;X;X;X;X;X	XXXXXXXXXPPPPPPPPPPPPPPPPPPXXXX	2.06045e-05	108.45	80.236	_ADLAPPS(ph)PQPPMLAPFAK_	ADLAPPS(1)PQPPMLAPFAK	ADLAPPS(80.24)PQPPMLAPFAK	7	2	964.473	-0.78212	0.67065	0.67065	NaN	NaN	0.73151	0.73151	NaN	NaN	NaN
A2ATK9;A2ATL0;A2ATL1	460;455;335	A2ATK9	A2ATK9		Fam171a1;Fam171a1;Fam171a1	>tr|A2ATK9|A2ATK9_MOUSE Family with sequence similarity 171, member A1 OS=Mus musculus GN=Fam171a1 PE=2 SV=1;>tr|A2ATL0|A2ATL0_MOUSE Family with sequence similarity 171, member A1 OS=Mus musculus GN=Fam171a1 PE=4 SV=1;>tr|A2ATL1|A2ATL1_MOUSE Family with se	1	114.496	1	119.224	0.000568364	156.83	1	85.5332	0.000567081	163.64	1	142.427	0.00126863	142.43	1	114.496	0.00151511	134.68		1	S	DNLTPSGTLGKDYHKSVEIFPLKARKSMEKE	X;X;X;Phospho (STY);X;X;X;X;X;X;X;X;X;X;X;Phospho (STY);X;X;X;X;X;X;X;X;X;X;X;X;X;X;X	XXXXXXXXXXXXXXXPPPPPPPPXXXXXXXX	0.000567081	163.64	114.5	_S(ph)VEIFPLK_	S(1)VEIFPLK	S(114.5)VEIFPLK	1	2	506.759	0.146	2.1401	2.1401	NaN	NaN	2.7897	2.7897	NaN	NaN	NaN
Q64012;A2AU62;Q64012-2;A2AU61;A2AU60	135;135;119;119;119	Q64012	Q64012	RNA-binding protein Raly	Raly;C130057N11Rik;C130057N11Rik;C130057N11Rik	>sp|Q64012|RALY_MOUSE RNA-binding protein Raly OS=Mus musculus GN=Raly PE=1 SV=3;>tr|A2AU62|A2AU62_MOUSE HnRNP-associated with lethal yellow (Fragment) OS=Mus musculus GN=C130057N11Rik PE=4 SV=1;>sp|Q64012-2|RALY_MOUSE Isoform 1 of RNA-binding protein Raly	1	89.0474	1	78.9389	0.00025354	117.93	1	81.7707	6.92847e-05	127.71	1	79.9739	9.8156e-05	125.61	1	89.0474	8.14717e-05	136.99		1	S	QDYFCARLFDYRGRLSPVPVPRAVPVKRPRV	X;X;X;X;X;X;X;X;X;X;X;X;X;X;X;Phospho (STY);X;X;X;X;X;X;X;X;X;X;X;X;X;X;X	XXXXXXXXXXXXPPPPPPPPPPXXXXXXXXX	6.92847e-05	136.99	89.047	_LS(ph)PVPVPR_	LS(1)PVPVPR	LS(89.05)PVPVPR	2	2	472.752	-0.26337	0.83879	0.83879	NaN	NaN	0.98004	0.98004	NaN	NaN	NaN
Q64012;A2AU62;Q64012-2	270;270;254	Q64012	Q64012	RNA-binding protein Raly	Raly;C130057N11Rik	>sp|Q64012|RALY_MOUSE RNA-binding protein Raly OS=Mus musculus GN=Raly PE=1 SV=3;>tr|A2AU62|A2AU62_MOUSE HnRNP-associated with lethal yellow (Fragment) OS=Mus musculus GN=C130057N11Rik PE=4 SV=1;>sp|Q64012-2|RALY_MOUSE Isoform 1 of RNA-binding protein Raly	1	80.1828	0.99999	51.783	2.4679e-164	258.83	0.999941	42.7953	1.63275e-217	282.91	1	120.771	4.31826e-239	293.2	1	80.1828	3.10638e-180	267.47		1;2;3	S	CSSSSRLPAPQEDTASEAGTPQGEVQTRDDG	X;X;X;X;X;X;X;X;X;X;X;X;X;Phospho (STY);X;Phospho (STY);X;X;X;Phospho (STY);X;X;X;X;X;X;X;X;X;X;X	XXXXXXPPPPPPPPPPPPPPPPPPPPPPXXX	4.31826e-239	293.2	93.5	_LPAPQEDT(ph)AS(ph)EAGT(ph)PQGEVQTR_	LPAPQEDT(1)AS(1)EAGT(1)PQGEVQTR	LPAPQEDT(85.82)AS(80.18)EAGT(54.22)PQGEVQT(-54.22)R	10	3	841.334	-0.12503	0.83724	0.83724	0.89082	0.65857	0.96131	0.96131	1.1971	0.6828	0.82358
A2AU91;P70399;A2AU89;P70399-3;A2AU90;F6QNC8	822;816;822;816;822;77	A2AU91	A2AU91	Tumor suppressor p53-binding protein 1	Trp53bp1;Tp53bp1;Trp53bp1;Trp53bp1;Trp53bp1	>tr|A2AU91|A2AU91_MOUSE Protein Trp53bp1 OS=Mus musculus GN=Trp53bp1 PE=4 SV=1;>sp|P70399|TP53B_MOUSE Tumor suppressor p53-binding protein 1 OS=Mus musculus GN=Tp53bp1 PE=1 SV=2;>tr|A2AU89|A2AU89_MOUSE Protein Trp53bp1 OS=Mus musculus GN=Trp53bp1 PE=4 SV=2	1	84.0264	0.999997	55.2398	3.38693e-39	200.99	1	77.5412	7.05786e-63	226.23	0.997723	26.4161	3.28815e-31	178.43	1	84.0264	3.4408e-158	284.48		1	S	DSKAETTEKDAVTEDSPQPPLPSVRDEPVRP	X;X;X;X;X;X;X;X;X;X;X;X;X;X;X;Phospho (STY);X;X;X;X;X;X;X;X;X;X;X;X;X;X;X	XXXPPPPPPPPPPPPPPPPPPPPPPXXXXXX	3.4408e-158	284.48	284.48	_DAVTEDS(ph)PQPPLPSVR_	DAVTEDS(1)PQPPLPSVR	DAVT(-84.03)EDS(84.03)PQPPLPS(-127.06)VR	7	2	894.414	-0.052167	0.55669	0.55669	NaN	NaN	0.73597	0.73597	NaN	NaN	NaN
A2AU91;P70399;A2AU89;P70399-3;A2AU90	332;326;332;326;332	A2AU91	A2AU91	Tumor suppressor p53-binding protein 1	Trp53bp1;Tp53bp1;Trp53bp1;Trp53bp1	>tr|A2AU91|A2AU91_MOUSE Protein Trp53bp1 OS=Mus musculus GN=Trp53bp1 PE=4 SV=1;>sp|P70399|TP53B_MOUSE Tumor suppressor p53-binding protein 1 OS=Mus musculus GN=Tp53bp1 PE=1 SV=2;>tr|A2AU89|A2AU89_MOUSE Protein Trp53bp1 OS=Mus musculus GN=Trp53bp1 PE=4 SV=2	0.993479	25.6273					0.94149	15.0763	3.14332e-76	189.11					0.993479	25.6273	5.06414e-14	91.889		1	S	ASDGCSTPSREEGGCSPVSTPATTLQLLQLS	X;X;X;X;X;X;X;X;X;X;X;X;X;X;X;Phospho (STY);X;X;X;X;X;X;X;X;X;X;X;X;X;X;X	XXXXXXXXXXPPPPPPPPPPPPPPPPPPPPP	3.14332e-76	189.11	84.107	_EEGGCS(ph)PVSTPATTLQLLQLSGQK_	EEGGCS(0.993)PVS(0.003)T(0.003)PAT(0.001)T(0.001)LQLLQLSGQK	EEGGCS(25.63)PVS(-25.63)T(-25.63)PAT(-32.64)T(-32.64)LQLLQLS(-82.03)GQK	6	3	861.079	-0.31797	0.37699	0.37699	NaN	NaN	0.47256	0.47256	NaN	NaN	NaN
A2AU91;P70399;A2AU89;P70399-3;A2AU90	552;546;552;546;552	A2AU91	A2AU91	Tumor suppressor p53-binding protein 1	Trp53bp1;Tp53bp1;Trp53bp1;Trp53bp1	>tr|A2AU91|A2AU91_MOUSE Protein Trp53bp1 OS=Mus musculus GN=Trp53bp1 PE=4 SV=1;>sp|P70399|TP53B_MOUSE Tumor suppressor p53-binding protein 1 OS=Mus musculus GN=Tp53bp1 PE=1 SV=2;>tr|A2AU89|A2AU89_MOUSE Protein Trp53bp1 OS=Mus musculus GN=Trp53bp1 PE=4 SV=2	0.994945	23.1999													0.994945	23.1999	5.69642e-18	149.71		1	S	EEDRENTQIDDTEPLSPVSNSKLPADSENVL	X;X;X;X;X;X;X;X;X;X;X;X;X;X;X;Phospho (STY);X;X;X;X;X;X;X;X;X;X;X;X;X;X;X	XXXXPPPPPPPPPPPPPPPPPPXXXXXXXXX	5.69642e-18	149.71	149.71	_ENTQIDDTEPLS(ph)PVSNSK_	ENTQIDDTEPLS(0.995)PVS(0.005)NSK	ENT(-86.86)QIDDT(-56.79)EPLS(23.2)PVS(-23.2)NS(-35.34)K	12	2	1027.45	-0.18156	1.5679	1.5679	NaN	NaN	1.4034	1.4034	NaN	NaN	NaN
A2AU91;P70399;P70399-2	1359;1347;404	A2AU91	A2AU91	Tumor suppressor p53-binding protein 1	Trp53bp1;Tp53bp1	>tr|A2AU91|A2AU91_MOUSE Protein Trp53bp1 OS=Mus musculus GN=Trp53bp1 PE=4 SV=1;>sp|P70399|TP53B_MOUSE Tumor suppressor p53-binding protein 1 OS=Mus musculus GN=Tp53bp1 PE=1 SV=2;>sp|P70399-2|TP53B_MOUSE Isoform 2 of Tumor suppressor p53-binding protein 1 O	1	97.1627	1	103.433	0.00286662	103.43	1	72.434	0.00107594	113.38	1	93.8392	0.00576208	93.839	1	97.1627	0.00460016	97.163		1	S	ADFALPSSRGGPGKLSPRKGISQTGAPVCEE	X;X;X;X;X;X;X;X;X;X;X;X;X;X;X;Phospho (STY);X;X;X;X;X;X;X;X;X;X;X;X;X;X;X	XXXXXXXXXPPPPPPPPPXXXXXXXXXXXXX	0.00107594	113.38	97.163	_GGPGKLS(ph)PR_	GGPGKLS(1)PR	GGPGKLS(97.16)PR	7	2	474.737	0.11255	0.47881	0.47881	NaN	NaN	0.67447	0.67447	NaN	NaN	NaN
A2AU91;P70399;A2AU89;P70399-3;A2AU90	530;524;530;524;530	A2AU91	A2AU91	Tumor suppressor p53-binding protein 1	Trp53bp1;Tp53bp1;Trp53bp1;Trp53bp1	>tr|A2AU91|A2AU91_MOUSE Protein Trp53bp1 OS=Mus musculus GN=Trp53bp1 PE=4 SV=1;>sp|P70399|TP53B_MOUSE Tumor suppressor p53-binding protein 1 OS=Mus musculus GN=Tp53bp1 PE=1 SV=2;>tr|A2AU89|A2AU89_MOUSE Protein Trp53bp1 OS=Mus musculus GN=Trp53bp1 PE=4 SV=2	0.959747	13.7736	0.857845	7.80648	0.00230739	121.73									0.959747	13.7736	0.000622417	157.96		1	S	LMLSTSEYSQSSKMESLGSPRTEEDRENTQI	X;X;X;X;X;X;X;X;X;X;X;X;X;Oxidation (M);X;Phospho (STY);X;X;X;X;X;X;X;X;X;X;X;X;X;X;X	XXXXXXXXXXXXXPPPPPPPPXXXXXXXXXX	0.000622417	157.96	68.557	_MES(ph)LGSPR_	MES(0.96)LGS(0.04)PR	MES(13.77)LGS(-13.77)PR	3	2	478.699	-0.14523	1.4616	1.4616	NaN	NaN	1.4935	1.4935	NaN	NaN	NaN
A2AU91;P70399;A2AU89;P70399-3;A2AU90	533;527;533;527;533	A2AU91	A2AU91	Tumor suppressor p53-binding protein 1	Trp53bp1;Tp53bp1;Trp53bp1;Trp53bp1	>tr|A2AU91|A2AU91_MOUSE Protein Trp53bp1 OS=Mus musculus GN=Trp53bp1 PE=4 SV=1;>sp|P70399|TP53B_MOUSE Tumor suppressor p53-binding protein 1 OS=Mus musculus GN=Tp53bp1 PE=1 SV=2;>tr|A2AU89|A2AU89_MOUSE Protein Trp53bp1 OS=Mus musculus GN=Trp53bp1 PE=4 SV=2	1	64.0855	0.99993	41.5527	0.000862206	150.1	1	64.0855	0.000567994	158.79	0.997464	25.948	0.00183902	123.51	0.999918	40.8606	0.00056826	157.38		1	S	STSEYSQSSKMESLGSPRTEEDRENTQIDDT	X;X;X;X;X;X;X;X;X;X;Oxidation (M);X;X;X;X;Phospho (STY);X;X;X;X;X;X;X;X;X;X;X;X;X;X;X	XXXXXXXXXXPPPPPPPPXXXXXXXXXXXXX	0.000567994	158.79	111.17	_MESLGS(ph)PR_	MESLGS(1)PR	MES(-64.09)LGS(64.09)PR	6	2	478.699	0.4761	0.55576	0.55576	NaN	NaN	0.7307	0.7307	NaN	NaN	NaN
A2AU91;P70399;A2AU89;P70399-3;P70399-2	1094;1088;1094;1088;145	A2AU91	A2AU91	Tumor suppressor p53-binding protein 1	Trp53bp1;Tp53bp1;Trp53bp1	>tr|A2AU91|A2AU91_MOUSE Protein Trp53bp1 OS=Mus musculus GN=Trp53bp1 PE=4 SV=1;>sp|P70399|TP53B_MOUSE Tumor suppressor p53-binding protein 1 OS=Mus musculus GN=Tp53bp1 PE=1 SV=2;>tr|A2AU89|A2AU89_MOUSE Protein Trp53bp1 OS=Mus musculus GN=Trp53bp1 PE=4 SV=2	0.543361	1.13163									0.485597	0	1.37801e-19	95.153	0.543361	1.13163	1.124e-06	69.845		1	S	VKPVGPVMDDAAPEDSASPVSQQRASQEQRA	X;X;X;X;X;X;X;X;X;X;X;X;X;X;X;Phospho (STY);X;X;X;X;X;X;X;X;X;X;X;X;X;X;X	PPPPPPPPPPPPPPPPPPPPPPPPXXXXXXX	1.37801e-19	95.153	64.27	_QSEQPVKPVGPVMDDAAPEDS(ph)ASPVSQQR_	QSEQPVKPVGPVMDDAAPEDS(0.543)AS(0.419)PVS(0.038)QQR	QS(-57.59)EQPVKPVGPVMDDAAPEDS(1.13)AS(-1.13)PVS(-11.56)QQR	21	3	1043.81	-0.088758	1.4908	1.4908	NaN	NaN	1.4763	1.4763	NaN	NaN	NaN
A2AU91;P70399;A2AU89;P70399-3;P70399-2	1096;1090;1096;1090;147	A2AU91	A2AU91	Tumor suppressor p53-binding protein 1	Trp53bp1;Tp53bp1;Trp53bp1	>tr|A2AU91|A2AU91_MOUSE Protein Trp53bp1 OS=Mus musculus GN=Trp53bp1 PE=4 SV=1;>sp|P70399|TP53B_MOUSE Tumor suppressor p53-binding protein 1 OS=Mus musculus GN=Tp53bp1 PE=1 SV=2;>tr|A2AU89|A2AU89_MOUSE Protein Trp53bp1 OS=Mus musculus GN=Trp53bp1 PE=4 SV=2	0.941318	12.4502	0.859535	9.23374	1.17068e-05	64.962	0.941318	12.4502	6.15765e-20	97.124	0.485597	0	1.37801e-19	95.153	0.93226	14.3973	2.24787e-27	102.36		1	S	PVGPVMDDAAPEDSASPVSQQRASQEQRASQ	X;X;X;X;X;X;X;X;X;X;X;X;X;X;X;Phospho (STY);X;X;X;X;X;X;X;X;X;X;X;X;X;X;X	PPPPPPPPPPPPPPPPPPPPPPXXXXXXXXX	2.24787e-27	102.36	97.124	_QSEQPVKPVGPVMDDAAPEDSAS(ph)PVSQQR_	QSEQPVKPVGPVMDDAAPEDS(0.054)AS(0.941)PVS(0.005)QQR	QS(-93.48)EQPVKPVGPVMDDAAPEDS(-12.45)AS(12.45)PVS(-22.63)QQR	23	3	1043.81	0.042389	0.46525	0.46525	NaN	NaN	0.6713	0.6713	NaN	NaN	NaN
A2AU91;P70399;A2AU89;P70399-3;A2AU90	262;256;262;256;262	A2AU91	A2AU91	Tumor suppressor p53-binding protein 1	Trp53bp1;Tp53bp1;Trp53bp1;Trp53bp1	>tr|A2AU91|A2AU91_MOUSE Protein Trp53bp1 OS=Mus musculus GN=Trp53bp1 PE=4 SV=1;>sp|P70399|TP53B_MOUSE Tumor suppressor p53-binding protein 1 OS=Mus musculus GN=Tp53bp1 PE=1 SV=2;>tr|A2AU89|A2AU89_MOUSE Protein Trp53bp1 OS=Mus musculus GN=Trp53bp1 PE=4 SV=2	0.903646	12.7323					0.903646	12.7323	0.00153157	70.538										1	S	KGIHVVEEQNLPLVRSEDRPSSPQVSVAAVE	X;X;X;X;X;X;X;X;X;X;X;X;X;X;X;Phospho (STY);X;X;X;X;X;X;X;X;X;X;X;X;X;X;X	XXXXXXXXXXXXXXXPPPPPPPPPPPPPPPP	0.00153157	70.538	70.538	_S(ph)EDRPSSPQVSVAAVETK_	S(0.904)EDRPS(0.048)S(0.048)PQVSVAAVETK	S(12.73)EDRPS(-12.73)S(-12.73)PQVS(-47.71)VAAVET(-68.97)K	1	3	656.309	0.54253	0.40091	0.40091	NaN	NaN	0.50628	0.50628	NaN	NaN	NaN
A2AU91;P70399;A2AU89;P70399-3;A2AU90	267;261;267;261;267	A2AU91	A2AU91	Tumor suppressor p53-binding protein 1	Trp53bp1;Tp53bp1;Trp53bp1;Trp53bp1	>tr|A2AU91|A2AU91_MOUSE Protein Trp53bp1 OS=Mus musculus GN=Trp53bp1 PE=4 SV=1;>sp|P70399|TP53B_MOUSE Tumor suppressor p53-binding protein 1 OS=Mus musculus GN=Tp53bp1 PE=1 SV=2;>tr|A2AU89|A2AU89_MOUSE Protein Trp53bp1 OS=Mus musculus GN=Trp53bp1 PE=4 SV=2	0.987758	19.1296	0.977204	18.6103	8.6991e-18	146.99	0.864303	8.05365	7.25458e-25	157.59	0.828531	6.94161	1.36024e-05	111.97	0.987758	19.1296	7.45788e-18	148.2		1	S	VEEQNLPLVRSEDRPSSPQVSVAAVETKEQV	X;X;X;X;X;X;X;X;X;X;X;X;X;X;X;Phospho (STY);X;X;X;X;X;X;X;X;X;X;X;X;X;X;X	XXXXXXXXXXPPPPPPPPPPPPPPPPPPXXX	7.25458e-25	157.59	148.2	_SEDRPS(ph)SPQVSVAAVETK_	SEDRPS(0.988)S(0.012)PQVSVAAVETK	S(-37.63)EDRPS(19.13)S(-19.13)PQVS(-56.96)VAAVET(-119.14)K	6	2	983.96	-0.13246	0.54633	0.54633	NaN	NaN	0.77875	0.77875	NaN	NaN	NaN
A2AU91;P70399;A2AU89;P70399-3;A2AU90	268;262;268;262;268	A2AU91	A2AU91	Tumor suppressor p53-binding protein 1	Trp53bp1;Tp53bp1;Trp53bp1;Trp53bp1	>tr|A2AU91|A2AU91_MOUSE Protein Trp53bp1 OS=Mus musculus GN=Trp53bp1 PE=4 SV=1;>sp|P70399|TP53B_MOUSE Tumor suppressor p53-binding protein 1 OS=Mus musculus GN=Tp53bp1 PE=1 SV=2;>tr|A2AU89|A2AU89_MOUSE Protein Trp53bp1 OS=Mus musculus GN=Trp53bp1 PE=4 SV=2	0.829524	7.22907	0.499119	0	0.00121026	73.448	0.499907	0	7.25458e-25	157.59	0.496828	0	1.36024e-05	111.97	0.829524	7.22907	1.95565e-33	166.35		1	S	EEQNLPLVRSEDRPSSPQVSVAAVETKEQVP	X;X;X;X;X;X;X;X;X;X;X;X;X;X;X;Phospho (STY);X;X;X;X;X;X;X;X;X;X;X;X;X;X;X	XXXXXXXXXPPPPPPPPPPPPPPPPPPXXXX	1.95565e-33	166.35	110.9	_SEDRPSS(ph)PQVSVAAVETK_	S(0.013)EDRPS(0.157)S(0.83)PQVSVAAVETK	S(-17.9)EDRPS(-7.23)S(7.23)PQVS(-55.67)VAAVET(-99.56)K	7	2	983.96	0.0010253	1.4293	1.4293	NaN	NaN	1.3411	1.3411	NaN	NaN	NaN
A2AU91;P70399;A2AU89;P70399-3;A2AU90	382;376;382;376;382	A2AU91	A2AU91	Tumor suppressor p53-binding protein 1	Trp53bp1;Tp53bp1;Trp53bp1;Trp53bp1	>tr|A2AU91|A2AU91_MOUSE Protein Trp53bp1 OS=Mus musculus GN=Trp53bp1 PE=4 SV=1;>sp|P70399|TP53B_MOUSE Tumor suppressor p53-binding protein 1 OS=Mus musculus GN=Tp53bp1 PE=1 SV=2;>tr|A2AU89|A2AU89_MOUSE Protein Trp53bp1 OS=Mus musculus GN=Trp53bp1 PE=4 SV=2	0.998072	27.7162	0.992801	23.1524	1.38658e-32	183.6	0.99747	27.1075	1.57306e-35	193.06	0.896772	12.0518	3.72359e-07	133.52	0.998072	27.7162	4.62169e-53	216.29		1	S	PSPDAFRSTPFIVPSSPTEQGGRKDEPMDMS	X;X;X;X;X;X;X;X;X;X;X;X;X;X;X;Phospho (STY);X;X;X;X;X;X;X;X;X;X;X;X;X;X;X	XXXXXXXPPPPPPPPPPPPPPPPXXXXXXXX	4.62169e-53	216.29	216.29	_STPFIVPSS(ph)PTEQGGR_	STPFIVPS(0.002)S(0.998)PTEQGGR	S(-156.79)T(-149.48)PFIVPS(-27.72)S(27.72)PT(-36.19)EQGGR	9	2	870.404	-0.071211	0.52696	0.52696	NaN	NaN	0.7009	0.7009	NaN	NaN	NaN
A2AUD5;Q9CYZ2;Q3TAI4;Q8BKP1;Q3TUJ9	12;12;12;12;12	A2AUD5;Q8BKP1	A2AUD5	Tumor protein D54	Tpd52l2;Tpd52l2;Tpd52l2;Tpd52l2;Tpd52l2	>tr|A2AUD5|A2AUD5_MOUSE Tumor protein D52-like 2 OS=Mus musculus GN=Tpd52l2 PE=4 SV=1;>sp|Q9CYZ2|TPD54_MOUSE Tumor protein D54 OS=Mus musculus GN=Tpd52l2 PE=1 SV=1;>tr|Q3TAI4|Q3TAI4_MOUSE Tumor protein D52-like 2 OS=Mus musculus GN=Tpd52l2 PE=2 SV=1;>tr|Q8	1	75.6299	1	75.6299	1.08022e-112	264.23	0.999947	42.9352	6.71942e-22	166.57	1	122.343	4.05148e-111	200.67	1	107.722	1.41219e-67	237.73		1	S	____MDSASQDINLNSPNKGVLSDFMTDVPV	X;X;X;X;Oxidation (M);X;X;X;X;X;X;X;X;X;X;Phospho (STY);X;X;X;X;X;X;X;X;X;Oxidation (M);X;X;X;X;X	XXXXPPPPPPPPPPPPPPPXXXXXXXXXXXX	1.08022e-112	264.23	114.03	_(ac)M(ox)DSASQDINLNS(ph)PNK_	MDSASQDINLNS(1)PNK	MDS(-98.16)AS(-75.63)QDINLNS(75.63)PNK	12	2	886.364	0.22209	0.78255	0.78255	NaN	NaN	0.88445	0.88445	NaN	NaN	1.0108
A2AUD5;Q9CYZ2;Q3TAI4;Q8BKP1;Q3TUJ9	189;180;166;160;146	A2AUD5;Q8BKP1	A2AUD5	Tumor protein D54	Tpd52l2;Tpd52l2;Tpd52l2;Tpd52l2;Tpd52l2	>tr|A2AUD5|A2AUD5_MOUSE Tumor protein D52-like 2 OS=Mus musculus GN=Tpd52l2 PE=4 SV=1;>sp|Q9CYZ2|TPD54_MOUSE Tumor protein D54 OS=Mus musculus GN=Tpd52l2 PE=1 SV=1;>tr|Q3TAI4|Q3TAI4_MOUSE Tumor protein D52-like 2 OS=Mus musculus GN=Tpd52l2 PE=2 SV=1;>tr|Q8	1	85.0922	1	72.9691	8.3299e-10	185.67	1	95.9506	3.16572e-29	217.48	0.999999	62.2862	0.000249385	157.58	1	85.0922	5.35637e-11	192.78		1	S	HSISMPVMRNSATFKSFEDRVGTIKSKVVGG	X;X;X;X;X;X;X;X;X;X;X;X;X;X;X;Phospho (STY);X;X;X;X;X;X;X;X;X;X;X;X;X;X;X	XXXXXXXXXPPPPPPPPPPPXXXXXXXXXXX	3.16572e-29	217.48	192.78	_NSATFKS(ph)FEDR_	NSATFKS(1)FEDR	NS(-108.48)AT(-85.09)FKS(85.09)FEDR	7	2	691.293	0.4854	0.71965	0.71965	NaN	NaN	0.73228	0.73228	NaN	NaN	NaN
A2AUK5;A2AUK8	578;566	A2AUK5	A2AUK5		Epb4.1l1;Epb4.1l1	>tr|A2AUK5|A2AUK5_MOUSE Erythrocyte protein band 4.1-like 1 OS=Mus musculus GN=Epb4.1l1 PE=4 SV=1;>tr|A2AUK8|A2AUK8_MOUSE Erythrocyte protein band 4.1-like 1 OS=Mus musculus GN=Epb4.1l1 PE=4 SV=1	0.999811	37.236	0.99882	29.2751	0.000192137	113.86	0.997482	25.978	0.000249437	109.87	0.999811	37.236	0.000286063	104.88	0.998877	29.492	7.53384e-05	122.01		1	S	GSEEKVKPPRPRAPESDTGDEDQDQERDAVF	X;X;X;X;X;X;X;X;X;X;X;X;X;X;X;Phospho (STY);X;X;X;X;X;X;X;X;X;X;X;X;X;X;X	XXXXXXXXXXXXPPPPPPPPPPPPPPPXXXX	7.53384e-05	122.01	104.88	_APES(ph)DTGDEDQDQER_	APES(1)DTGDEDQDQER	APES(37.24)DT(-37.24)GDEDQDQER	4	2	886.318	0.87092	0.4904	0.4904	NaN	NaN	0.63674	0.63674	NaN	NaN	2.3716
A2AUK5;A2AUK8	648;636	A2AUK5	A2AUK5		Epb4.1l1;Epb4.1l1	>tr|A2AUK5|A2AUK5_MOUSE Erythrocyte protein band 4.1-like 1 OS=Mus musculus GN=Epb4.1l1 PE=4 SV=1;>tr|A2AUK8|A2AUK8_MOUSE Erythrocyte protein band 4.1-like 1 OS=Mus musculus GN=Epb4.1l1 PE=4 SV=1	1	88.7857	0.999993	51.4546	6.5017e-40	221.13	0.999999	61.4985	4.82932e-74	243.86	0.999991	50.4603	2.3017e-89	254.53	1	88.7857	1.06533e-19	191.35		1;2	S	FEDFSRSLPELDRDKSDSETEGLVFARDLKG	X;X;X;X;X;X;X;X;X;X;X;X;X;X;X;Phospho (STY);X;Phospho (STY);X;Phospho (STY);X;X;X;X;X;X;X;X;X;X;X	XXXXXXXXXXXXXPPPPPPPPPPPPPPXXXX	2.3017e-89	254.53	183.24	_DKS(ph)DS(ph)ETEGLVFAR_	DKS(1)DS(1)ETEGLVFAR	DKS(88.79)DS(37.47)ET(-37.47)EGLVFAR	3	2	857.342	0.51114	0.82333	0.82333	1.1829	NaN	1.0808	1.0808	1.1572	NaN	NaN
A2AUK5;A2AUK8	650;638	A2AUK5	A2AUK5		Epb4.1l1;Epb4.1l1	>tr|A2AUK5|A2AUK5_MOUSE Erythrocyte protein band 4.1-like 1 OS=Mus musculus GN=Epb4.1l1 PE=4 SV=1;>tr|A2AUK8|A2AUK8_MOUSE Erythrocyte protein band 4.1-like 1 OS=Mus musculus GN=Epb4.1l1 PE=4 SV=1	0.999821	37.4685	0.467484	0	3.53114e-21	134.14	0.99929	31.4828	1.64565e-15	179.41					0.999821	37.4685	2.18407e-16	183.24		2	S	DFSRSLPELDRDKSDSETEGLVFARDLKGPS	X;X;X;X;X;X;X;X;X;X;X;X;X;Phospho (STY);X;Phospho (STY);X;X;X;X;X;X;X;X;X;X;X;X;X;X;X	XXXXXXXXXXXPPPPPPPPPPPPPPXXXXXX	3.53114e-21	183.24	183.24	_DKS(ph)DS(ph)ETEGLVFAR_	DKS(1)DS(1)ETEGLVFAR	DKS(88.79)DS(37.47)ET(-37.47)EGLVFAR	5	2	857.342	0.51114	1.1829	NaN	1.1829	NaN	1.1572	NaN	1.1572	NaN	NaN
A2AUK5;A2AUK8;Q9Z2H5;Q9Z2H5-2	684;672;684;672	A2AUK5	A2AUK5	Band 4.1-like protein 1	Epb4.1l1;Epb4.1l1;Epb41l1	>tr|A2AUK5|A2AUK5_MOUSE Erythrocyte protein band 4.1-like 1 OS=Mus musculus GN=Epb4.1l1 PE=4 SV=1;>tr|A2AUK8|A2AUK8_MOUSE Erythrocyte protein band 4.1-like 1 OS=Mus musculus GN=Epb4.1l1 PE=4 SV=1;>sp|Q9Z2H5|E41L1_MOUSE Band 4.1-like protein 1 OS=Mus muscul	0.924112	10.8555	0.924112	10.8555	2.49751e-21	166.77	0.590553	1.5906	1.59173e-21	169.67	0.837361	7.11688	0.000208239	112.74	0.5	0	0.000243376	111.77		1	S	DESGGLEDSPDRGACSTPEMPQFESVKAETM	X;X;X;X;X;X;X;X;Phospho (STY);X;X;X;X;X;X;Phospho (STY);X;X;X;Oxidation (M);X;X;X;X;X;X;X;X;X;X;X	XXXXXXXXXXXXPPPPPPPPPPPPPPPXXXX	1.59173e-21	169.67	166.77	_GACS(ph)TPEMPQFESVK_	GACS(0.924)T(0.076)PEMPQFESVK	GACS(10.86)T(-10.86)PEMPQFES(-133.11)VK	4	2	874.357	-0.25425	1.0067	1.0067	NaN	NaN	1.2954	1.2954	NaN	NaN	NaN
A2AUK5;A2AUK8;Q9Z2H5;Q9Z2H5-2	677;665;677;665	A2AUK5	A2AUK5	Band 4.1-like protein 1	Epb4.1l1;Epb4.1l1;Epb41l1	>tr|A2AUK5|A2AUK5_MOUSE Erythrocyte protein band 4.1-like 1 OS=Mus musculus GN=Epb4.1l1 PE=4 SV=1;>tr|A2AUK8|A2AUK8_MOUSE Erythrocyte protein band 4.1-like 1 OS=Mus musculus GN=Epb4.1l1 PE=4 SV=1;>sp|Q9Z2H5|E41L1_MOUSE Band 4.1-like protein 1 OS=Mus muscul	0.99999	49.9888	0.999483	33.195	0.00214974	67.88	0.999975	46.265	5.40538e-05	100.85					0.99999	49.9888	0.0105046	100.85		1	S	KGPSSQEDESGGLEDSPDRGACSTPEMPQFE	X;X;X;X;X;X;X;X;X;X;X;X;X;X;X;Phospho (STY);X;X;X;X;X;X;Phospho (STY);Phospho (STY);X;X;Oxidation (M);X;X;X;X	XPPPPPPPPPPPPPPPPPPXXXXXXXXXXXX	5.40538e-05	100.85	100.85	_GPSSQEDESGGLEDS(ph)PDR_	GPSSQEDESGGLEDS(1)PDR	GPS(-76.53)S(-76.53)QEDES(-49.99)GGLEDS(49.99)PDR	15	2	971.371	0.66011	0.6703	0.6703	NaN	NaN	0.87358	0.87358	NaN	NaN	NaN
A2AUK5;A2AUK8;Q9Z2H5;Q9Z2H5-2;Q9Z2H5-3;A2AUK6	430;430;430;430;430;357	A2AUK5	A2AUK5	Band 4.1-like protein 1	Epb4.1l1;Epb4.1l1;Epb41l1;Epb4.1l1	>tr|A2AUK5|A2AUK5_MOUSE Erythrocyte protein band 4.1-like 1 OS=Mus musculus GN=Epb4.1l1 PE=4 SV=1;>tr|A2AUK8|A2AUK8_MOUSE Erythrocyte protein band 4.1-like 1 OS=Mus musculus GN=Epb4.1l1 PE=4 SV=1;>sp|Q9Z2H5|E41L1_MOUSE Band 4.1-like protein 1 OS=Mus muscul	1	93.6127	1	92.4495	0.0216648	100.55	1	93.6127	0.000421754	121.02					1	93.6127	6.5818e-07	193.28		1	S	PFFERSSSKRYTMSRSLDGAEFSRPASVSEN	X;X;X;X;X;X;X;X;X;X;X;X;X;X;X;Phospho (STY);X;X;X;X;X;X;X;X;X;X;Phospho (STY);X;Phospho (STY);X;X	XXXXXXXXXXXXXXXPPPPPPPPPXXXXXXX	6.5818e-07	193.28	97.911	_S(ph)LDGAEFSR_	S(1)LDGAEFSR	S(93.61)LDGAEFS(-93.61)R	1	2	531.219	0.45485	1.4396	1.4396	NaN	NaN	1.4102	1.4102	NaN	NaN	NaN
A2AUK5;A2AUK8;Q9Z2H5;Q9Z2H5-2;Q9Z2H5-3;A2AUK7;A2AUK6	782;770;782;770;634;633;534	A2AUK5	A2AUK5	Band 4.1-like protein 1	Epb4.1l1;Epb4.1l1;Epb41l1;Epb4.1l1;Epb4.1l1	>tr|A2AUK5|A2AUK5_MOUSE Erythrocyte protein band 4.1-like 1 OS=Mus musculus GN=Epb4.1l1 PE=4 SV=1;>tr|A2AUK8|A2AUK8_MOUSE Erythrocyte protein band 4.1-like 1 OS=Mus musculus GN=Epb4.1l1 PE=4 SV=1;>sp|Q9Z2H5|E41L1_MOUSE Band 4.1-like protein 1 OS=Mus muscul	1	82.8235	1	75.9139	0.00138328	140.16	1	69.6396	0.00148889	138.08	1	72.7195	0.00129052	142	1	82.8235	0.00136899	140.45		1	S	MIPGPQTVATEIRSLSPIIGKDVLTSTYGAT	X;X;X;X;X;X;X;X;X;X;X;X;X;X;X;Phospho (STY);X;X;X;X;X;X;X;X;X;X;X;X;X;X;X	XXXXXXXXXXXXXPPPPPPPPXXXXXXXXXX	0.00129052	142	135.55	_SLS(ph)PIIGK_	SLS(1)PIIGK	S(-82.82)LS(82.82)PIIGK	3	2	447.738	-0.30284	0.8354	0.8354	NaN	NaN	1.0478	1.0478	NaN	NaN	NaN
A2AUM0;Q9QZ05;A2AUM1;Q9QZ05-3;Q9QZ05-2;A2AUM2;A2AUL9;Q9QZ05-6	230;230;152;152;118;109;230;109	A2AUM0	A2AUM0	Eukaryotic translation initiation factor 2-alpha kinase 4	Eif2ak4;Eif2ak4;Eif2ak4;Eif2ak4;Eif2ak4	>tr|A2AUM0|A2AUM0_MOUSE Eukaryotic translation initiation factor 2 alpha kinase 4 OS=Mus musculus GN=Eif2ak4 PE=4 SV=1;>sp|Q9QZ05|E2AK4_MOUSE Eukaryotic translation initiation factor 2-alpha kinase 4 OS=Mus musculus GN=Eif2ak4 PE=1 SV=2;>tr|A2AUM1|A2AUM1_M	1	96.3792					1	60.0624	0.00611774	60.062	1	78.0211	0.000124948	90.896	1	96.3792	7.20744e-05	96.379		1	S	RDPAGHRAAAILHGGSPDFVGNGKARTYSSG	X;X;X;X;X;X;X;X;X;X;X;X;X;X;X;Phospho (STY);X;X;X;X;X;X;X;X;X;X;X;X;X;X;X	XXXXXXXPPPPPPPPPPPPPPPPPXXXXXXX	7.20744e-05	96.379	96.379	_AAAILHGGS(ph)PDFVGNGK_	AAAILHGGS(1)PDFVGNGK	AAAILHGGS(96.38)PDFVGNGK	9	2	845.901	0.48907	2.7417	2.7417	NaN	NaN	2.5891	2.5891	NaN	NaN	NaN
A7UAK5;A7UAK8;A2AUP4;A2AUP5;Q7TS91;A2AUP1;A2AUP3	490;490;490;461;461;461;461	A7UAK5	A7UAK5		Pfkfb3;Pfkfb3;Pfkfb3;Pfkfb3;Pfkfb3;Pfkfb3;Pfkfb3	>tr|A7UAK5|A7UAK5_MOUSE 6-phosphofructo-2-kinase/fructose-2, 6-biphosphatase 3 splice variant 2 OS=Mus musculus GN=Pfkfb3 PE=2 SV=1;>tr|A7UAK8|A7UAK8_MOUSE 6-phosphofructo-2-kinase/fructose-2, 6-biphosphatase 3 splice variant 5 OS=Mus musculus GN=Pfkfb3 PE	0.999816	37.3615									0.998748	29.0611	0.00087824	80.859	0.999816	37.3615	2.05726e-05	149.52		1	S	KQDAKKGPNPLMRRNSVTPLASPEPTKKPRI	X;X;X;X;X;X;X;X;X;X;X;X;X;X;X;Phospho (STY);X;X;X;X;X;X;X;X;X;X;X;X;X;X;X	XXXXXXXXXXXXXPPPPPPPPPPPPPPXXXX	2.05726e-05	149.52	149.52	_RNS(ph)VTPLASPEPTK_	RNS(1)VTPLASPEPTK	RNS(37.36)VT(-37.36)PLAS(-64.16)PEPT(-97.72)K	3	2	788.89	-0.322	0.83483	0.83483	NaN	NaN	0.76044	0.76044	NaN	NaN	NaN
Q3UHC7;B7ZD29;A2AUX3;A2AUX4;A2AUX5;F6RK07;Q3UHC7-2;Q3UHC7-3	702;645;645;674;637;596;578;702	Q3UHC7	Q3UHC7	Disabled homolog 2-interacting protein	Dab2ip;Dab2ip;Dab2ip;Dab2ip;Dab2ip;Dab2ip	>sp|Q3UHC7|DAB2P_MOUSE Disabled homolog 2-interacting protein OS=Mus musculus GN=Dab2ip PE=1 SV=1;>tr|B7ZD29|B7ZD29_MOUSE Disabled homolog 2 (Drosophila) interacting protein OS=Mus musculus GN=Dab2ip PE=4 SV=1;>tr|A2AUX3|A2AUX3_MOUSE Disabled homolog 2 (Dr	0.999971	45.351	0.999971	45.351	0.000432702	120.77	0.948902	12.6881	0.0142008	75.819	0.996076	24.0458	0.00923044	84.687						1	S	IENDLSGLIDFTRLPSPTPENKDLFFVTRSS	X;X;X;X;X;X;X;X;X;X;X;X;X;X;X;Phospho (STY);X;X;X;X;X;X;X;X;X;X;X;X;X;X;X	XXXXXXXXXXXXXPPPPPPPPPXXXXXXXXX	0.000432702	120.77	113.71	_LPS(ph)PTPENK_	LPS(1)PTPENK	LPS(45.35)PT(-45.35)PENK	3	2	531.747	-0.10149	0.42784	0.42784	NaN	NaN	0.54834	0.54834	NaN	NaN	NaN
Q3UHC7;B7ZD29;A2AUX3;A2AUX4;A2AUX5;F6RK07;Q3UHC7-2	995;938;938;967;930;889;871	Q3UHC7	Q3UHC7	Disabled homolog 2-interacting protein	Dab2ip;Dab2ip;Dab2ip;Dab2ip;Dab2ip;Dab2ip	>sp|Q3UHC7|DAB2P_MOUSE Disabled homolog 2-interacting protein OS=Mus musculus GN=Dab2ip PE=1 SV=1;>tr|B7ZD29|B7ZD29_MOUSE Disabled homolog 2 (Drosophila) interacting protein OS=Mus musculus GN=Dab2ip PE=4 SV=1;>tr|A2AUX3|A2AUX3_MOUSE Disabled homolog 2 (Dr	1	101.733	1	101.733	4.68634e-08	161.08					0.999995	52.5908	0.000207633	114.01						1	S	ELKPRAMHKQGPSPVSPNALDRTAAWLLTMN	X;X;X;X;X;X;X;X;X;X;X;X;X;X;X;Phospho (STY);X;X;X;X;X;X;X;X;X;X;X;X;X;X;X	XXXXXXXXXPPPPPPPPPPPPPXXXXXXXXX	4.68634e-08	161.08	161.08	_QGPSPVS(ph)PNALDR_	QGPSPVS(1)PNALDR	QGPS(-101.73)PVS(101.73)PNALDR	7	2	709.327	-0.098498	0.3359	0.3359	NaN	NaN	0.43798	0.43798	NaN	NaN	NaN
Q3UHC7;B7ZD29;A2AUX3;A2AUX4;A2AUX5;F6RK07;Q3UHC7-2;Q3UHC7-3;F6QQP6	747;690;690;719;682;641;623;747;351	Q3UHC7;F6QQP6	Q3UHC7	Disabled homolog 2-interacting protein	Dab2ip;Dab2ip;Dab2ip;Dab2ip;Dab2ip;Dab2ip;Dab2ip	>sp|Q3UHC7|DAB2P_MOUSE Disabled homolog 2-interacting protein OS=Mus musculus GN=Dab2ip PE=1 SV=1;>tr|B7ZD29|B7ZD29_MOUSE Disabled homolog 2 (Drosophila) interacting protein OS=Mus musculus GN=Dab2ip PE=4 SV=1;>tr|A2AUX3|A2AUX3_MOUSE Disabled homolog 2 (Dr	0.999772	36.4151	0.999772	36.4151	0.0002544	122.63	0.997199	25.514	0.000250489	122.93	0.787809	5.69695	0.0513845	46.68	0.999166	30.7834	0.000179297	163.64		1	S	ANEPDLQMANGSKSLSMVDLQDARTLDGEAG	X;X;X;X;X;X;X;X;X;X;X;X;X;X;X;Phospho (STY);X;X;X;X;X;X;X;X;X;X;X;X;X;X;X	XXXXXXXXXXXXXPPPPPPPPPPPXXXXXXX	0.000179297	163.64	122.63	_SLS(ph)MVDLQDAR_	SLS(1)MVDLQDAR	S(-36.42)LS(36.42)MVDLQDAR	3	2	657.792	0.90595	0.93409	0.93409	NaN	NaN	1.2313	1.2313	NaN	NaN	NaN
A2AUY4	1431	A2AUY4	A2AUY4		Baz2b	>tr|A2AUY4|A2AUY4_MOUSE Bromodomain adjacent to zinc finger domain, 2B OS=Mus musculus GN=Baz2b PE=4 SV=1	0.702954	6.69562	0.248488	0	0.0086858	53.059									0.702954	6.69562	9.85901e-06	113.51		1	S	LSHQNSGKHPLGSVPSATTAQSPVGKTDASL	X;X;X;X;X;X;X;X;X;X;X;X;X;X;X;Phospho (STY);X;X;X;X;X;X;X;X;X;X;X;X;X;X;X	XXXXXXXXPPPPPPPPPPPPPPPPPPXXXXX	9.85901e-06	113.51	64.522	_HPLGSVPS(ph)ATTAQSPVGK_	HPLGS(0.004)VPS(0.703)AT(0.15)T(0.118)AQS(0.025)PVGK	HPLGS(-22.91)VPS(6.7)AT(-6.7)T(-7.76)AQS(-14.47)PVGK	8	2	907.446	0.29425	1.3729	1.3729	NaN	NaN	1.3839	1.3839	NaN	NaN	NaN
A2AUY4	1437	A2AUY4	A2AUY4		Baz2b	>tr|A2AUY4|A2AUY4_MOUSE Bromodomain adjacent to zinc finger domain, 2B OS=Mus musculus GN=Baz2b PE=4 SV=1	0.999999	58.639	0.999999	58.639	6.39647e-07	121.82	0.99996	44.255	0.000539351	79.346	0.999987	49.7662	5.50315e-06	115.57	0.999915	42.2932	9.85901e-06	113.51		1	S	GKHPLGSVPSATTAQSPVGKTDASLFSSGSG	X;X;X;X;X;X;X;X;X;X;X;X;X;X;X;Phospho (STY);X;X;X;X;X;X;X;X;X;X;X;X;X;X;X	XXPPPPPPPPPPPPPPPPPPXXXXXXXXXXX	6.39647e-07	121.82	119.56	_HPLGSVPSATTAQS(ph)PVGK_	HPLGSVPSATTAQS(1)PVGK	HPLGS(-93.67)VPS(-93.6)AT(-73.24)T(-58.64)AQS(58.64)PVGK	14	3	605.3	0.33607	1.1997	1.1997	NaN	NaN	1.1892	1.1892	NaN	NaN	NaN
A2AVJ5;B0R106;B0R105;B0R102;B0R103	28;28;28;28;28	A2AVJ5	A2AVJ5	Proline-rich protein 5-like	Prr5l;Prr5l;Prr5l;Prr5l;Prr5l	>sp|A2AVJ5|PRR5L_MOUSE Proline-rich protein 5-like OS=Mus musculus GN=Prr5l PE=2 SV=1;>tr|B0R106|B0R106_MOUSE Novel protein (2600010E01Rik) (Fragment) OS=Mus musculus GN=Prr5l PE=4 SV=1;>tr|B0R105|B0R105_MOUSE Novel protein (2600010E01Rik) (Fragment) OS=Mu	0.994645	22.6903	0.973416	15.6574	0.0036845	98.582	0.982107	17.3965	1.43186e-06	146.96	0.994645	22.6903	5.48981e-06	128.22	0.992362	21.1369	1.64541e-06	171.26		1	S	FHKMGSFRRPRPRFMSSPVLSELPRFQAARQ	X;X;X;X;X;X;X;X;X;X;X;X;X;X;Oxidation (M);Phospho (STY);X;X;X;X;X;X;X;X;X;X;X;X;X;X;X	XXXXXXXXXXXXXPPPPPPPPPPPPXXXXXX	1.43186e-06	171.26	119.96	_FMS(ph)SPVLSELPR_	FMS(0.995)S(0.005)PVLSELPR	FMS(22.69)S(-22.69)PVLS(-58.8)ELPR	3	2	721.841	-0.039246	0.65175	0.65175	NaN	NaN	0.71011	0.71011	NaN	NaN	NaN
Q99PL5;A2AVJ7;Q99PL5-2;Q99PL5-3;Q99PL5-4;Q99PL5-6;Q99PL5-7;Q99PL5-8;Q99PL5-5;Q99PL5-9;Q99PL5-10	187;187;187;187;187;187;187;187;187;187;187	Q99PL5	Q99PL5	Ribosome-binding protein 1	Rrbp1;Rrbp1	>sp|Q99PL5|RRBP1_MOUSE Ribosome-binding protein 1 OS=Mus musculus GN=Rrbp1 PE=2 SV=2;>tr|A2AVJ7|A2AVJ7_MOUSE Ribosome binding protein 1 OS=Mus musculus GN=Rrbp1 PE=4 SV=1;>sp|Q99PL5-2|RRBP1_MOUSE Isoform RRp61 of Ribosome-binding protein 1 OS=Mus musculus	1	122.08	1	84.7176	0.000339266	108.14	1	75.4785	0.00270195	75.479	1	64.5199	0.000498472	98.902	1	122.08	0.000234601	140.93		1	S	ATPKEVPMVAVPPVGSKASSPATSSQGKKGQ	X;X;X;X;X;X;X;Oxidation (M);X;X;X;X;X;X;X;Phospho (STY);X;X;X;X;X;X;X;X;X;X;X;X;X;X;X	XXXXPPPPPPPPPPPPPXXXXXXXXXXXXXX	0.000234601	140.93	122.08	_EVPMVAVPPVGS(ph)K_	EVPMVAVPPVGS(1)K	EVPMVAVPPVGS(122.08)K	12	2	695.346	0.081728	0.89871	0.89871	NaN	NaN	1.0918	1.0918	NaN	NaN	0.50954
A2AW86;Q60767	1704;1704	A2AW86	A2AW86	Lymphocyte antigen 75	Ly75;Ly75	>tr|A2AW86|A2AW86_MOUSE Lymphocyte antigen 75 OS=Mus musculus GN=Ly75 PE=4 SV=1;>sp|Q60767|LY75_MOUSE Lymphocyte antigen 75 OS=Mus musculus GN=Ly75 PE=1 SV=2	0.97941	16.773	0.863017	7.99351	0.00322188	115.78	0.878192	8.57912	0.0015054	125.74	0.93162	11.3431	0.00670952	101.39	0.97941	16.773	0.00521091	108.43		1	S	WFLLQRSHIRWTGFSSVRYEHGTNEDEVMLP	X;X;X;X;X;X;X;X;X;X;X;X;X;X;X;Phospho (STY);X;X;X;X;X;X;X;X;X;X;X;X;X;X;X	XXXXXXXXXXPPPPPPPPXXXXXXXXXXXXX	0.0015054	125.74	108.43	_WTGFSS(ph)VR_	WTGFS(0.021)S(0.979)VR	WT(-67.44)GFS(-16.77)S(16.77)VR	6	2	510.221	0.21689	0.60637	0.60637	NaN	NaN	0.6217	0.6217	NaN	NaN	NaN
A2AWA9;A2AWA9-2;A2AWA7;A2AWA9-3	42;42;42;24	A2AWA9	A2AWA9	Rab GTPase-activating protein 1	Rabgap1;Rabgap1	>sp|A2AWA9|RBGP1_MOUSE Rab GTPase-activating protein 1 OS=Mus musculus GN=Rabgap1 PE=2 SV=1;>sp|A2AWA9-2|RBGP1_MOUSE Isoform 2 of Rab GTPase-activating protein 1 OS=Mus musculus GN=Rabgap1;>tr|A2AWA7|A2AWA7_MOUSE RAB GTPase activating protein 1 (Fragment)	0.999963	45.3448	0.950269	13.6958	0.0383047	44.807	0.998879	30.5836	0.00936561	96.391					0.999963	45.3448	1.87672e-05	124.69		1	S	LVSRQGDETPSTNNGSDDEKTGLKIVGNGSE	X;X;X;X;X;X;X;X;X;X;X;X;X;X;X;Phospho (STY);X;X;X;X;X;X;X;X;X;X;X;X;X;X;X	XXXXPPPPPPPPPPPPPPPPPPPPXXXXXXX	1.87672e-05	124.69	124.69	_QGDETPSTNNGS(ph)DDEK_	QGDETPSTNNGS(1)DDEK	QGDET(-63.25)PS(-51.4)T(-45.34)NNGS(45.34)DDEK	12	2	887.326	0.57113	1.5498	1.5498	NaN	NaN	1.3835	1.3835	NaN	NaN	1.5703
E9QLG3;A2AWL7;H7BX50;A2AWL7-3;A2AWL7-2	1450;1450;1449;1371;1449	E9QLG3	E9QLG3	MAX gene-associated protein	Mga;Mga;Mga	>tr|E9QLG3|E9QLG3_MOUSE MAX gene-associated protein OS=Mus musculus GN=Mga PE=4 SV=1;>sp|A2AWL7|MGAP_MOUSE MAX gene-associated protein OS=Mus musculus GN=Mga PE=2 SV=1;>tr|H7BX50|H7BX50_MOUSE MAX gene-associated protein OS=Mus musculus GN=Mga PE=4 SV=1;>sp	0.995395	23.4671					0.952776	13.1907	0.00858414	61.235	0.995395	23.4671	0.00139927	84.759	0.991273	20.9028	0.00289854	74.46		1	S	ERLHGGKGLPFYAGLSPSGKLVAYKRKPSST	X;X;X;X;X;X;X;X;X;X;X;X;X;X;X;Phospho (STY);X;X;X;X;X;X;X;X;X;X;X;X;X;X;X	XXXXXXXPPPPPPPPPPPPPXXXXXXXXXXX	0.00139927	84.759	65.563	_GLPFYAGLS(ph)PSGK_	GLPFYAGLS(0.995)PS(0.004)GK	GLPFY(-39.02)AGLS(23.47)PS(-23.47)GK	9	2	687.329	0.22935	0.91928	0.91928	NaN	NaN	0.94161	0.94161	NaN	NaN	NaN
A2BDX0;Q9Z103	904;624	A2BDX0	A2BDX0	Activity-dependent neuroprotector homeobox protein	Adnp;Adnp	>tr|A2BDX0|A2BDX0_MOUSE Activity-dependent neuroprotective protein OS=Mus musculus GN=Adnp PE=3 SV=1;>sp|Q9Z103|ADNP_MOUSE Activity-dependent neuroprotector homeobox protein OS=Mus musculus GN=Adnp PE=2 SV=1	1	131.238	1	195.603	3.58344e-16	195.6	1	164.148	2.53526e-23	209.56	1	71.5314	1.74469e-06	143.38	1	131.238	3.29422e-16	196.18		1	S	GSPFDPVFEVEPKIPSDNLEEPVPKVIPEGA	X;X;X;X;X;X;X;X;X;X;X;X;X;X;X;Phospho (STY);X;X;X;X;X;X;X;X;X;X;X;X;X;X;X	XXXXXXXXXXXXXPPPPPPPPPPPPXXXXXX	2.53526e-23	209.56	131.24	_IPS(ph)DNLEEPVPK_	IPS(1)DNLEEPVPK	IPS(131.24)DNLEEPVPK	3	2	709.334	0.32094	1.2579	1.2579	NaN	NaN	1.1819	1.1819	NaN	NaN	NaN
A2BDX0;Q9Z103	708;428	A2BDX0	A2BDX0	Activity-dependent neuroprotector homeobox protein	Adnp;Adnp	>tr|A2BDX0|A2BDX0_MOUSE Activity-dependent neuroprotective protein OS=Mus musculus GN=Adnp PE=3 SV=1;>sp|Q9Z103|ADNP_MOUSE Activity-dependent neuroprotector homeobox protein OS=Mus musculus GN=Adnp PE=2 SV=1	1	79.4662	1	157.865	0.000237679	157.86	1	153.809	0.000192636	162.32	1	106.323	0.000102353	168.61	1	79.4662	0.00860629	99.941		1	S	QNGQDKTNAPSRLNQSPGLAPVKRTYEQMEF	X;X;X;X;X;X;X;X;X;X;X;X;X;X;X;Phospho (STY);X;X;X;X;X;X;X;X;X;X;X;X;X;X;X	XXXXXXXXXXXXPPPPPPPPPPPXXXXXXXX	0.000102353	168.61	79.466	_LNQS(ph)PGLAPVK_	LNQS(1)PGLAPVK	LNQS(79.47)PGLAPVK	4	2	602.31	0.92122	0.5934	0.5934	NaN	NaN	0.75453	0.75453	NaN	NaN	NaN
A2BDX0	98	A2BDX0	A2BDX0		Adnp	>tr|A2BDX0|A2BDX0_MOUSE Activity-dependent neuroprotective protein OS=Mus musculus GN=Adnp PE=3 SV=1	1	149.693	1	118.712	3.32851e-11	187.11	1	139.781	7.70821e-05	139.78	1	99.8441	3.05146e-22	217.91	1	149.693	1.26819e-07	149.69		1	S	SKFFSAYKSHFRNVHSEDFENRILLNCPYCT	X;X;X;X;X;X;X;X;X;X;X;X;X;X;X;Phospho (STY);X;X;X;X;X;X;X;X;X;X;X;X;X;X;X	XXXXXXXXXXXXPPPPPPPPPPXXXXXXXXX	3.05146e-22	217.91	149.69	_NVHS(ph)EDFENR_	NVHS(1)EDFENR	NVHS(149.69)EDFENR	4	2	663.759	0.55179	0.77724	0.77724	NaN	NaN	0.85815	0.85815	NaN	NaN	NaN
Q9EQU5;A2BE93;Q9EQU5-2	160;160;148	Q9EQU5;Q9EQU5-2	Q9EQU5	Protein SET	Set;Set	>sp|Q9EQU5|SET_MOUSE Protein SET OS=Mus musculus GN=Set PE=1 SV=1;>tr|A2BE93|A2BE93_MOUSE Protein SET (Fragment) OS=Mus musculus GN=Set PE=3 SV=1;>sp|Q9EQU5-2|SET_MOUSE Isoform 2 of Protein SET OS=Mus musculus GN=Set	0.998677	30.0201									0.996323	27.073	0.0626879	42.095	0.998677	30.0201	0.00147408	83.966		1	S	YFENKVLSKEFHLNESGDPSSKSTEIKWKSG	X;X;X;X;X;X;X;X;X;X;X;X;X;X;X;Phospho (STY);X;X;X;X;X;X;X;X;X;X;X;X;X;X;X	XXXXXXXXXPPPPPPPPPPPPPXXXXXXXXX	0.00147408	83.966	54.501	_EFHLNES(ph)GDPSSK_	EFHLNES(0.999)GDPS(0.001)SK	EFHLNES(30.02)GDPS(-30.02)S(-34.83)K	7	2	763.812	-0.60373	2.4304	2.4304	NaN	NaN	2.3468	2.3468	NaN	NaN	1.2658
Q9EQU5;A2BE93;A2BE92;Q9EQU5-3;Q9EQU5-2	62;62;62;62;50	Q9EQU5;Q9EQU5-2	Q9EQU5	Protein SET	Set;Set;Set	>sp|Q9EQU5|SET_MOUSE Protein SET OS=Mus musculus GN=Set PE=1 SV=1;>tr|A2BE93|A2BE93_MOUSE Protein SET (Fragment) OS=Mus musculus GN=Set PE=3 SV=1;>tr|A2BE92|A2BE92_MOUSE Protein SET (Fragment) OS=Mus musculus GN=Set PE=3 SV=1;>sp|Q9EQU5-3|SET_MOUSE Isoform	1	212.11	1	175.655	3.40159e-62	253.16	1	97.2033	6.64972e-15	194.23	1	44.132	0.00025047	156.6	1	212.11	7.78401e-24	212.11		1	S	IDEVQNEIDRLNEQASEEILKVEQKYNKLRQ	X;X;X;X;X;X;X;X;X;X;X;X;X;X;X;Phospho (STY);X;X;X;X;X;X;X;X;X;X;X;X;X;X;X	XXXXXXXXXXPPPPPPPPPPPXXXXXXXXXX	3.40159e-62	253.16	212.11	_LNEQAS(ph)EEILK_	LNEQAS(1)EEILK	LNEQAS(212.11)EEILK	6	2	677.319	0.74325	0.60846	0.60846	NaN	NaN	0.78583	0.78583	NaN	NaN	0.59137
Q9EQU5;A2BE93;A2BE92;Q9EQU5-3	30;30;30;30	Q9EQU5	Q9EQU5	Protein SET	Set;Set;Set	>sp|Q9EQU5|SET_MOUSE Protein SET OS=Mus musculus GN=Set PE=1 SV=1;>tr|A2BE93|A2BE93_MOUSE Protein SET (Fragment) OS=Mus musculus GN=Set PE=3 SV=1;>tr|A2BE92|A2BE92_MOUSE Protein SET (Fragment) OS=Mus musculus GN=Set PE=3 SV=1;>sp|Q9EQU5-3|SET_MOUSE Isoform	1	74.8778	1	66.3559	0.00147052	125.97	1	74.8778	0.00149529	137.95	1	66.8195	0.00202395	122.28	1	64.6812	0.00115601	144.65		1	S	KPRPAAAPKLEDKSASPGLPKGEKEQQEAIE	X;X;X;X;X;X;X;X;X;X;X;X;X;X;X;Phospho (STY);X;X;X;X;X;X;X;X;X;X;X;X;X;X;X	XXXXXXXXXXXXXPPPPPPPPXXXXXXXXXX	0.00115601	144.65	137.95	_SAS(ph)PGLPK_	SAS(1)PGLPK	S(-74.88)AS(74.88)PGLPK	3	2	418.699	0.96028	0.56373	0.56373	NaN	NaN	0.82349	0.82349	NaN	NaN	0.74183
A2BFB0;O08609;A2BFA9	45;45;45	A2BFB0	A2BFB0	Max-like protein X	Mlx;Mlx;Mlx	>tr|A2BFB0|A2BFB0_MOUSE MAX-like protein X OS=Mus musculus GN=Mlx PE=4 SV=1;>sp|O08609|MLX_MOUSE Max-like protein X OS=Mus musculus GN=Mlx PE=1 SV=1;>tr|A2BFA9|A2BFA9_MOUSE MAX-like protein X (Fragment) OS=Mus musculus GN=Mlx PE=4 SV=1	0.999812	37.2615	0.999812	37.2615	1.54761e-11	145.71	0.980507	17.3256	0.000261974	95.414	0.999734	35.7752	0.000113483	113.73	0.99933	31.7471	3.38437e-05	122.64		1	S	ARARRGSGRRGAPQLSPESPLLSGARGCRED	X;X;X;X;X;X;X;X;X;X;X;X;X;X;X;Phospho (STY);X;X;X;X;X;X;X;X;X;X;X;X;X;X;X	XXXXXXXXXXPPPPPPPPPPPPPPPPXXXXX	1.54761e-11	145.71	145.71	_GAPQLS(ph)PESPLLSGAR_	GAPQLS(1)PESPLLSGAR	GAPQLS(37.26)PES(-37.26)PLLS(-70.91)GAR	6	2	830.409	0.059638	0.90709	0.90709	NaN	NaN	0.96377	0.96377	NaN	NaN	NaN
E9QAQ7;A2BH40-2;A2BH40-4;A2BH40;A2BH40-3	1946;1562;1561;1942;1725	E9QAQ7	E9QAQ7	AT-rich interactive domain-containing protein 1A	Arid1a;Arid1a	>tr|E9QAQ7|E9QAQ7_MOUSE AT-rich interactive domain-containing protein 1A OS=Mus musculus GN=Arid1a PE=4 SV=1;>sp|A2BH40-2|ARI1A_MOUSE Isoform 2 of AT-rich interactive domain-containing protein 1A OS=Mus musculus GN=Arid1a;>sp|A2BH40-4|ARI1A_MOUSE Isoform 4	1	63.222	0.99998	46.889	0.00193024	78.486	1	63.222	0.000695037	88.075	0.999973	45.7233	0.000454588	92.039	0.999955	43.489	0.0029937	73.881		1	S	SAEATKESSKFPFGISPAQSHRNIKILEDEP	X;X;X;X;X;X;X;X;X;X;X;X;X;X;X;Phospho (STY);X;X;X;X;X;X;X;X;X;X;X;X;X;X;X	XXXXXXXXXXPPPPPPPPPPPPXXXXXXXXX	0.000454588	92.039	88.075	_FPFGIS(ph)PAQSHR_	FPFGIS(1)PAQSHR	FPFGIS(63.22)PAQS(-63.22)HR	6	3	475.222	-0.085277	0.32924	0.32924	NaN	NaN	0.41636	0.41636	NaN	NaN	NaN
E9QAQ7;A2BH40-2;A2BH40-4;A2BH40;A2BH40-3	697;312;312;697;697	E9QAQ7	E9QAQ7	AT-rich interactive domain-containing protein 1A	Arid1a;Arid1a	>tr|E9QAQ7|E9QAQ7_MOUSE AT-rich interactive domain-containing protein 1A OS=Mus musculus GN=Arid1a PE=4 SV=1;>sp|A2BH40-2|ARI1A_MOUSE Isoform 2 of AT-rich interactive domain-containing protein 1A OS=Mus musculus GN=Arid1a;>sp|A2BH40-4|ARI1A_MOUSE Isoform 4	0.999996	53.5704	0.999823	37.5201	1.21417e-08	135.81	0.999996	53.5704	1.68599e-48	197.84	0.999978	46.508	3.86438e-44	189.55	0.998982	29.9179	5.30306e-72	221.79		1	S	FSPHTSPHLPGIRGPSPSPVGSPASVAQSRS	X;X;X;X;X;X;X;X;X;X;X;X;X;X;X;Phospho (STY);X;X;X;X;X;X;X;X;X;X;X;X;X;X;X	XXXXXXXXXXXXXPPPPPPPPPPPPPPPPPX	5.30306e-72	221.79	197.84	_GPS(ph)PSPVGSPASVAQSR_	GPS(1)PSPVGSPASVAQSR	GPS(53.57)PS(-53.57)PVGS(-112.87)PAS(-139.36)VAQS(-168.57)R	3	2	830.888	0.85622	0.59799	0.59799	NaN	NaN	0.78855	0.78855	NaN	NaN	NaN
E9QAQ7;A2BH40-2;A2BH40-4;A2BH40;A2BH40-3	770;385;385;770;770	E9QAQ7	E9QAQ7	AT-rich interactive domain-containing protein 1A	Arid1a;Arid1a	>tr|E9QAQ7|E9QAQ7_MOUSE AT-rich interactive domain-containing protein 1A OS=Mus musculus GN=Arid1a PE=4 SV=1;>sp|A2BH40-2|ARI1A_MOUSE Isoform 2 of AT-rich interactive domain-containing protein 1A OS=Mus musculus GN=Arid1a;>sp|A2BH40-4|ARI1A_MOUSE Isoform 4	0.499994	0													0.499994	0	0.00080998	75.376		1	S	QRNPQMPQYTSPQPGSALSPRQPSGGQMHSG	X;X;X;X;X;X;X;X;X;X;X;X;X;X;X;Phospho (STY);X;X;X;X;X;X;X;X;X;X;X;X;X;X;X	XXPPPPPPPPPPPPPPPPPPPXXXXXXXXXX	0.00080998	75.376	75.376	_NPQMPQYTSPQPGS(ph)ALSPR_	NPQMPQYTSPQPGS(0.5)ALS(0.5)PR	NPQMPQY(-72.98)T(-65.9)S(-46.28)PQPGS(0)ALS(0)PR	14	3	712.658	-0.10491	0.77608	0.77608	NaN	NaN	0.81155	0.81155	NaN	NaN	NaN
E9QAQ7;A2BH40-2;A2BH40-4;A2BH40;A2BH40-3	773;388;388;773;773	E9QAQ7	E9QAQ7	AT-rich interactive domain-containing protein 1A	Arid1a;Arid1a	>tr|E9QAQ7|E9QAQ7_MOUSE AT-rich interactive domain-containing protein 1A OS=Mus musculus GN=Arid1a PE=4 SV=1;>sp|A2BH40-2|ARI1A_MOUSE Isoform 2 of AT-rich interactive domain-containing protein 1A OS=Mus musculus GN=Arid1a;>sp|A2BH40-4|ARI1A_MOUSE Isoform 4	0.999694	35.1476					0.956163	13.489	0.000101986	95.666	0.995081	23.0687	3.16577e-07	120.42	0.999694	35.1476	2.92322e-59	190.85		1	S	PQMPQYTSPQPGSALSPRQPSGGQMHSGVGS	X;X;Oxidation (M);X;X;X;X;X;X;X;X;X;X;X;X;Phospho (STY);X;X;X;X;X;X;X;X;X;X;X;X;X;X;X	PPPPPPPPPPPPPPPPPPXXXXXXXXXXXXX	2.92322e-59	190.85	190.85	_NPQMPQYTSPQPGSALS(ph)PR_	NPQMPQYTSPQPGSALS(1)PR	NPQMPQY(-118.41)T(-94.84)S(-73.47)PQPGS(-35.15)ALS(35.15)PR	17	2	1068.48	0.2962	0.81035	0.81035	NaN	NaN	0.80146	0.80146	NaN	NaN	NaN
A2BIE1	505	A2BIE1	A2BIE1		Qser1	>tr|A2BIE1|A2BIE1_MOUSE Glutamine and serine rich 1 OS=Mus musculus GN=Qser1 PE=4 SV=2	0.999844	39.5195													0.999844	39.5195	0.000639222	91.317		1	S	FASSTRGQTLQSSIPSPDPKSYAERKLDSSV	X;X;X;X;X;X;X;X;X;X;X;X;X;X;X;Phospho (STY);X;X;X;X;X;X;X;X;X;X;X;X;X;X;X	XXXXXXPPPPPPPPPPPPPPXXXXXXXXXXX	0.000639222	91.317	91.317	_GQTLQSSIPS(ph)PDPK_	GQTLQSSIPS(1)PDPK	GQT(-61.21)LQS(-43.56)S(-39.52)IPS(39.52)PDPK	10	2	767.861	-0.36935	1.3095	1.3095	NaN	NaN	1.195	1.195	NaN	NaN	NaN
A2CG35;P35283	63;15	A2CG35	A2CG35	Ras-related protein Rab-12	Rab12;Rab12	>tr|A2CG35|A2CG35_MOUSE RAB12, member RAS oncogene family OS=Mus musculus GN=Rab12 PE=3 SV=1;>sp|P35283|RAB12_MOUSE Ras-related protein Rab-12 OS=Mus musculus GN=Rab12 PE=1 SV=3	0.999868	38.7887	0.999335	31.7714	2.68116e-05	102.57	0.982058	17.4703	8.45252e-05	86.005	0.999868	38.7887	2.65684e-16	138.55	0.998537	28.383	0.000833892	68.569		1	S	CMDPSAALHRRPAGGSLGAVSPALSGGQARR	X;X;X;X;X;X;X;X;X;X;X;X;X;X;X;Phospho (STY);X;X;X;X;X;X;X;X;X;X;X;X;X;X;X	XXXXXXXXXXPPPPPPPPPPPPPPPPPPPPX	2.65684e-16	138.55	107.98	_RPAGGS(ph)LGAVSPALSGGQAR_	RPAGGS(1)LGAVSPALSGGQAR	RPAGGS(38.79)LGAVS(-38.79)PALS(-87.38)GGQAR	6	3	630.318	0.27309	0.62246	0.62246	NaN	NaN	0.79544	0.79544	NaN	NaN	0.81047
A2CG35;P35283	68;20	A2CG35	A2CG35	Ras-related protein Rab-12	Rab12;Rab12	>tr|A2CG35|A2CG35_MOUSE RAB12, member RAS oncogene family OS=Mus musculus GN=Rab12 PE=3 SV=1;>sp|P35283|RAB12_MOUSE Ras-related protein Rab-12 OS=Mus musculus GN=Rab12 PE=1 SV=3	1	74.0062	0.999994	52.1548	7.96989e-63	185.84	0.999996	54.5742	8.78269e-18	180.52	1	73.9822	8.75979e-101	219.64	1	74.0062	2.3894e-100	216.19		1	S	AALHRRPAGGSLGAVSPALSGGQARRRKQPP	X;X;X;X;X;X;X;X;X;X;X;X;X;X;X;Phospho (STY);X;X;X;X;X;X;X;X;X;X;X;X;X;X;X	XXXXXPPPPPPPPPPPPPPPPPPPPXXXXXX	8.75979e-101	219.64	193.53	_RPAGGSLGAVS(ph)PALSGGQAR_	RPAGGSLGAVS(1)PALSGGQAR	RPAGGS(-81.05)LGAVS(74.01)PALS(-74.01)GGQAR	11	2	944.973	-0.051458	1.0554	1.0554	NaN	NaN	1.1886	1.1886	NaN	NaN	0.81047
A2CG63;A2CG63-2;F6R6U0	755;668;173	A2CG63	A2CG63	AT-rich interactive domain-containing protein 4B	Arid4b;Arid4b	>sp|A2CG63|ARI4B_MOUSE AT-rich interactive domain-containing protein 4B OS=Mus musculus GN=Arid4b PE=2 SV=1;>sp|A2CG63-2|ARI4B_MOUSE Isoform 2 of AT-rich interactive domain-containing protein 4B OS=Mus musculus GN=Arid4b;>tr|F6R6U0|F6R6U0_MOUSE AT-rich int	0.978886	17.5811	0.978886	17.5811	0.0077116	62.861	0.839205	7.24863	0.0284779	76.85	0.333333	0	0.00728344	90.861	0.485664	0	0.000118715	118.24		1	S	HSTHSRNELISKEEQSSPSLLEENKVHTDLV	X;X;X;X;X;X;X;X;X;X;X;X;X;X;X;Phospho (STY);X;X;X;X;X;X;X;X;X;X;X;X;X;X;X	XXXXXXXXXXXXPPPPPPPPPPPPPXXXXXX	0.000118715	118.24	62.861	_EEQS(ph)SPSLLEENK_	EEQS(0.979)S(0.017)PS(0.004)LLEENK	EEQS(17.58)S(-17.58)PS(-23.86)LLEENK	4	2	785.338	0.3878	0.58662	0.58662	NaN	NaN	0.79108	0.79108	NaN	NaN	NaN
A2CG63;A2CG63-2;F6R6U0	756;669;174	A2CG63	A2CG63	AT-rich interactive domain-containing protein 4B	Arid4b;Arid4b	>sp|A2CG63|ARI4B_MOUSE AT-rich interactive domain-containing protein 4B OS=Mus musculus GN=Arid4b PE=2 SV=1;>sp|A2CG63-2|ARI4B_MOUSE Isoform 2 of AT-rich interactive domain-containing protein 4B OS=Mus musculus GN=Arid4b;>tr|F6R6U0|F6R6U0_MOUSE AT-rich int	0.893324	11.2743									0.333333	0	0.00728344	90.861	0.893324	11.2743	0.000118715	118.24		1	S	STHSRNELISKEEQSSPSLLEENKVHTDLVI	X;X;X;X;X;X;X;X;X;X;X;X;X;X;X;Phospho (STY);X;X;X;X;X;X;X;X;X;X;X;X;X;X;X	XXXXXXXXXXXPPPPPPPPPPPPPXXXXXXX	0.000118715	118.24	92.8	_EEQSS(ph)PSLLEENK_	EEQS(0.04)S(0.893)PS(0.067)LLEENK	EEQS(-13.48)S(11.27)PS(-11.27)LLEENK	5	2	785.338	0.19547	1.3036	1.3036	NaN	NaN	1.1812	1.1812	NaN	NaN	NaN
A2CG63;A2CG63-2	431;431	A2CG63	A2CG63	AT-rich interactive domain-containing protein 4B	Arid4b	>sp|A2CG63|ARI4B_MOUSE AT-rich interactive domain-containing protein 4B OS=Mus musculus GN=Arid4b PE=2 SV=1;>sp|A2CG63-2|ARI4B_MOUSE Isoform 2 of AT-rich interactive domain-containing protein 4B OS=Mus musculus GN=Arid4b	0.877086	8.53442	0.81681	6.4922	0.00117752	98.337	0.823635	6.69322	0.00680268	76.728					0.877086	8.53442	0.0188992	61.11		1	S	PCKDCENKEVKVKEESETEIKEVNVEDSKNV	X;X;X;X;X;X;X;X;X;X;X;X;X;X;X;Phospho (STY);X;X;X;X;X;X;X;X;X;X;X;X;X;X;X	XXXXXXXXXXXPPPPPPPPPPXXXXXXXXXX	0.00117752	98.337	61.11	_VKEES(ph)ETEIK_	VKEES(0.877)ET(0.123)EIK	VKEES(8.53)ET(-8.53)EIK	5	2	636.292	0.050723	0.6824	0.6824	NaN	NaN	0.88871	0.88871	NaN	NaN	NaN
A2CG63;A2CG63-2;F6R6U0	839;752;257	A2CG63	A2CG63	AT-rich interactive domain-containing protein 4B	Arid4b;Arid4b	>sp|A2CG63|ARI4B_MOUSE AT-rich interactive domain-containing protein 4B OS=Mus musculus GN=Arid4b PE=2 SV=1;>sp|A2CG63-2|ARI4B_MOUSE Isoform 2 of AT-rich interactive domain-containing protein 4B OS=Mus musculus GN=Arid4b;>tr|F6R6U0|F6R6U0_MOUSE AT-rich int	0.999078	30.3492	0.821414	6.6273	0.000691627	90.385	0.948152	12.6215	0.000301988	100.58	0.499617	0	0.0567738	57.616	0.999078	30.3492	0.00011292	119.38		1	S	GKRRYCSADECLQTGSPGKKEDRTKSKEPLC	X;X;X;X;X;X;X;X;X;X;X;X;X;X;X;Phospho (STY);X;X;X;X;X;X;X;X;X;X;X;X;X;X;X	XXXXPPPPPPPPPPPPPPPPXXXXXXXXXXX	0.00011292	119.38	105.9	_YCSADECLQTGS(ph)PGK_	YCSADECLQT(0.001)GS(0.999)PGK	Y(-102.38)CS(-86.86)ADECLQT(-30.35)GS(30.35)PGK	12	2	876.834	-0.044235	0.60709	0.60709	NaN	NaN	0.76052	0.76052	NaN	NaN	NaN
A2RSJ4	418	A2RSJ4	A2RSJ4	UHRF1-binding protein 1-like	Uhrf1bp1l	>sp|A2RSJ4|UH1BL_MOUSE UHRF1-binding protein 1-like OS=Mus musculus GN=Uhrf1bp1l PE=2 SV=2	0.885149	9.21483									0.885149	9.21483	0.0001137	69.979	0.875057	9.66971	6.18297e-06	80.061		1	S	LKQAMKDRNLGSPPKSPTHASPQHTQTEKDS	X;X;X;X;X;X;X;X;X;X;X;X;X;X;X;Phospho (STY);X;X;X;X;X;X;X;X;X;X;X;X;X;X;X	XXXXXXXXPPPPPPPPPPPPPPPPPPPPPXX	6.18297e-06	80.061	69.979	_NLGSPPKS(ph)PTHASPQHTQTEK_	NLGS(0.001)PPKS(0.885)PT(0.106)HAS(0.004)PQHT(0.003)QTEK	NLGS(-27.91)PPKS(9.21)PT(-9.21)HAS(-23.49)PQHT(-24.37)QT(-37.41)EK	8	4	581.277	-0.54531	0.65839	0.65839	NaN	NaN	0.64194	0.64194	NaN	NaN	NaN
A2RSQ0	1076	A2RSQ0	A2RSQ0	DENN domain-containing protein 5B	Dennd5b	>sp|A2RSQ0|DEN5B_MOUSE DENN domain-containing protein 5B OS=Mus musculus GN=Dennd5b PE=1 SV=2	0.999754	36.9643	0.999379	35.123	0.00443531	77.912	0.996048	27.0476	0.00593948	73.927	0.999754	36.9643	0.00171317	90.412	0.999599	37.1336	0.00726648	70.412		1	S	RTPPQQKSPTTTRRLSITSLTGKPAKPNAGQ	X;X;X;X;X;X;X;X;X;X;X;X;X;X;X;Phospho (STY);X;X;X;X;X;X;X;X;X;X;X;X;X;X;X	XXXXXXXXXXXXXPPPPPPPPPPXXXXXXXX	0.00171317	90.412	90.412	_RLS(ph)ITSLTGK_	RLS(1)ITSLTGK	RLS(36.96)IT(-36.96)S(-43.53)LT(-63.31)GK	3	2	578.31	0.14314	0.83625	0.83625	NaN	NaN	0.95057	0.95057	NaN	NaN	NaN
A2RSX9;E9Q3G5;E9QAY5;G5E8V9	100;125;11;132	A2RSX9;G5E8V9	G5E8V9		Arfip1;Arfip1;Arfip1;Arfip1	>tr|A2RSX9|A2RSX9_MOUSE Arfip1 protein OS=Mus musculus GN=Arfip1 PE=2 SV=1;>tr|E9Q3G5|E9Q3G5_MOUSE Protein Arfip1 OS=Mus musculus GN=Arfip1 PE=4 SV=1;>tr|E9QAY5|E9QAY5_MOUSE Protein Arfip1 OS=Mus musculus GN=Arfip1 PE=4 SV=1;>tr|G5E8V9|G5E8V9_MOUSE MCG1809	0.999999	59.2316	0.999647	34.5845	0.00386861	108.47	0.999969	45.1331	0.00111936	134.3	0.999999	59.2316	0.000755192	165.63	0.9997	35.2526	0.00672307	90.653		1	S	IKNPAMEKLELVRKWSLNTYKCTRQIISEKL	X;X;X;X;X;X;X;X;X;X;X;X;X;X;X;Phospho (STY);X;X;X;X;X;X;X;X;X;X;X;X;X;X;X	XXXXXXXXXXXXXPPPPPPPPXXXXXXXXXX	0.000755192	165.63	165.63	_KWS(ph)LNTYK_	KWS(1)LNTYK	KWS(59.23)LNT(-59.23)Y(-116.53)K	3	2	560.265	0.25208	1.6581	1.6581	NaN	NaN	2.3314	2.3314	NaN	NaN	NaN
A2RTF1	3	A2RTF1	A2RTF1	Cation channel sperm-associated protein subunit beta	Catsperb	>sp|A2RTF1|CTSRB_MOUSE Cation channel sperm-associated protein subunit beta OS=Mus musculus GN=Catsperb PE=1 SV=1	0.999956	47.3381	0.999956	47.3381	0.00143935	53.033														2	S	_____________MESPLIYVMLVLLNVFVF	X;X;X;X;X;X;X;X;X;X;X;X;X;X;X;Phospho (STY);X;X;X;Phospho (STY);X;X;X;X;X;X;X;X;X;X;X	XXXXXXXXXXXXXXPPPPPPPPPPPPPPPPP	0.00143935	53.033	53.033	_(ac)ES(ph)PLIY(ph)VMLVLLNVFVFSSGVIHNK_	ES(1)PLIY(1)VMLVLLNVFVFSSGVIHNK	ES(47.34)PLIY(49.28)VMLVLLNVFVFS(-47.34)S(-47.34)GVIHNK	2	3	1007.51	-0.26346	0.27038	NaN	0.27038	NaN	0.27548	NaN	0.27548	NaN	NaN
A2RTH5	247	A2RTH5	A2RTH5		Lcmt1	>tr|A2RTH5|A2RTH5_MOUSE Leucine carboxyl methyltransferase 1 OS=Mus musculus GN=Lcmt1 PE=2 SV=1	1	102.533	1	105.16	8.96847e-05	141.37	1	92.4548	0.000404972	107.99	1	86.8042	0.000268282	121.56	1	102.533	0.000330206	116.19		1	S	DDRFGQIMIENLRRRSCDLAGVETCKSLESQ	X;X;X;X;X;X;X;X;X;X;X;X;X;X;X;Phospho (STY);X;X;X;X;X;X;X;X;X;X;X;X;X;X;X	XXXXXXXXXXXXXPPPPPPPPPPPPPXXXXX	8.96847e-05	141.37	115.06	_S(ph)CDLAGVETCK_	S(1)CDLAGVETCK	S(102.53)CDLAGVET(-102.53)CK	1	2	660.254	-0.31277	0.77675	0.77675	NaN	NaN	1.0256	1.0256	NaN	NaN	NaN
Q8BLX7;A3KFV4;A3KFV3;E9Q0X4	260;260;260;260	Q8BLX7	Q8BLX7	Collagen alpha-1(XVI) chain	Col16a1;Col16a1;Col16a1;Col16a1	>sp|Q8BLX7|COGA1_MOUSE Collagen alpha-1(XVI) chain OS=Mus musculus GN=Col16a1 PE=2 SV=2;>tr|A3KFV4|A3KFV4_MOUSE Collagen alpha-1(XVI) chain OS=Mus musculus GN=Col16a1 PE=4 SV=1;>tr|A3KFV3|A3KFV3_MOUSE Collagen alpha-1(XVI) chain OS=Mus musculus GN=Col16a1	0.966619	14.6176	0.938385	11.827	1.93435e-16	174.22	0.966619	14.6176	1.16748e-11	171.13					0.959329	13.7268	1.90472e-111	250.86		1	S	GGCPPETSKSRRDTQSNELIEINPQTEGKVY	X;X;X;X;X;X;X;X;X;X;X;X;X;X;X;Phospho (STY);X;X;X;X;X;X;X;X;X;X;X;X;X;X;X	XXXXXXXXXXXXPPPPPPPPPPPPPPPPPXX	1.90472e-111	250.86	171.13	_DTQS(ph)NELIEINPQTEGK_	DT(0.033)QS(0.967)NELIEINPQTEGK	DT(-14.62)QS(14.62)NELIEINPQT(-134.94)EGK	4	2	998.449	0.10829	0.48226	0.48226	NaN	NaN	0.59342	0.59342	NaN	NaN	NaN
A3KGF9	399	A3KGF9	A3KGF9	Uncharacterized protein C15orf52 homolog		>sp|A3KGF9|CO052_MOUSE Uncharacterized protein C15orf52 homolog OS=Mus musculus PE=1 SV=1	0.984987	18.2156	0.868264	8.2539	6.81984e-07	121.46	0.97436	15.8041	6.07958e-05	99.344	0.534817	2.39351	0.00184624	69.03	0.984987	18.2156	0.000116604	92.913		1;2	S	RNEREPDRQETVPATSPIPASPEGLKGESGT	X;X;X;X;X;X;X;X;X;X;X;X;X;X;X;Phospho (STY);X;X;X;X;Phospho (STY);X;X;X;X;X;X;X;X;X;X	XXXXXXXXPPPPPPPPPPPPPPPPPPXXXXX	6.81984e-07	121.46	88.551	_QETVPATS(ph)PIPASPEGLK_	QETVPAT(0.015)S(0.985)PIPASPEGLK	QET(-57.09)VPAT(-18.22)S(18.22)PIPAS(-38.01)PEGLK	8	2	951.466	0.12296	0.41769	0.41769	3.2787	NaN	0.5704	0.5704	3.0315	NaN	NaN
A3KGF9	404	A3KGF9	A3KGF9	Uncharacterized protein C15orf52 homolog		>sp|A3KGF9|CO052_MOUSE Uncharacterized protein C15orf52 homolog OS=Mus musculus PE=1 SV=1	0.996195	25.4823	0.991132	23.5365	0.00386991	61.361	0.996195	25.4823	0.00444991	60.133					0.991969	20.0025	0.00175976	83.871		1;2	S	PDRQETVPATSPIPASPEGLKGESGTSTASL	X;X;X;X;X;X;X;X;X;X;Phospho (STY);X;X;X;X;Phospho (STY);X;X;X;X;X;X;X;X;X;X;X;X;X;X;X	XXXPPPPPPPPPPPPPPPPPPXXXXXXXXXX	0.00175976	83.871	60.133	_QETVPATSPIPAS(ph)PEGLK_	QETVPAT(0.001)S(0.003)PIPAS(0.996)PEGLK	QET(-42.63)VPAT(-30.29)S(-25.48)PIPAS(25.48)PEGLK	13	2	951.466	0.87403	0.49283	0.49283	3.2787	NaN	0.6042	0.6042	3.0315	NaN	NaN
A3KGU7;P16546;P16546-2	1323;1323;1303	A3KGU7;P16546;P16546-2	P16546	Spectrin alpha chain, brain	Spna2;Sptan1	>tr|A3KGU7|A3KGU7_MOUSE Protein Spna2 OS=Mus musculus GN=Spna2 PE=4 SV=1;>sp|P16546|SPTN1_MOUSE Spectrin alpha chain, non-erythrocytic 1 OS=Mus musculus GN=Sptan1 PE=1 SV=4;>sp|P16546-2|SPTN1_MOUSE Isoform 2 of Spectrin alpha chain, non-erythrocytic 1 OS=M	0.983367	17.7174					0.983367	17.7174	3.42709e-06	130.29	0.738501	4.52075	0.000684432	116.35	0.975232	15.9568	0.0200755	53.395		1	S	EDLKEKCTELNQAWTSLGKRADQRKAKLGDS	X;X;X;X;X;X;X;X;X;X;X;X;X;X;X;Phospho (STY);X;X;X;X;X;X;X;X;X;X;X;X;X;X;X	XXXXXXPPPPPPPPPPPPPXXXXXXXXXXXX	3.42709e-06	130.29	121.32	_CTELNQAWTS(ph)LGK_	CTELNQAWT(0.017)S(0.983)LGK	CT(-100.49)ELNQAWT(-17.72)S(17.72)LGK	10	2	794.347	-0.26153	0.42302	0.42302	NaN	NaN	0.47225	0.47225	NaN	NaN	1.8325
A3KGU7;P16546;P16546-2	1029;1029;1029	A3KGU7;P16546;P16546-2	P16546	Spectrin alpha chain, brain	Spna2;Sptan1	>tr|A3KGU7|A3KGU7_MOUSE Protein Spna2 OS=Mus musculus GN=Spna2 PE=4 SV=1;>sp|P16546|SPTN1_MOUSE Spectrin alpha chain, non-erythrocytic 1 OS=Mus musculus GN=Sptan1 PE=1 SV=4;>sp|P16546-2|SPTN1_MOUSE Isoform 2 of Spectrin alpha chain, non-erythrocytic 1 OS=M	0.749343	4.77086	0.72119	4.12741	0.0107224	65.295	0.749343	4.77086	9.36614e-08	111.18	0.499986	0	5.01211e-05	67.866						1	S	GFVPAAYVKKLDPAQSASRENLLEEQGSIAL	X;X;X;X;X;X;X;X;X;X;X;X;X;X;X;Phospho (STY);X;X;X;X;X;X;X;X;X;X;X;X;X;X;X	XXXXXXXXXPPPPPPPPPPPPPPPPPPPPPP	9.36614e-08	111.18	46.569	_KLDPAQS(ph)ASRENLLEEQGSIALR_	KLDPAQS(0.749)AS(0.25)RENLLEEQGS(0.001)IALR	KLDPAQS(4.77)AS(-4.77)RENLLEEQGS(-29.42)IALR	7	3	869.104	-0.45585	1.4506	1.4506	NaN	NaN	1.8838	1.8838	NaN	NaN	1.2883
A3KGU7;P16546;P16546-2	1031;1031;1031	A3KGU7;P16546;P16546-2	P16546	Spectrin alpha chain, brain	Spna2;Sptan1	>tr|A3KGU7|A3KGU7_MOUSE Protein Spna2 OS=Mus musculus GN=Spna2 PE=4 SV=1;>sp|P16546|SPTN1_MOUSE Spectrin alpha chain, non-erythrocytic 1 OS=Mus musculus GN=Sptan1 PE=1 SV=4;>sp|P16546-2|SPTN1_MOUSE Isoform 2 of Spectrin alpha chain, non-erythrocytic 1 OS=M	0.939319	11.8976	0.939319	11.8976	0.00116372	95.428	0.809576	6.28536	3.40951e-18	139.44	0.499986	0	5.01211e-05	67.866						1	S	VPAAYVKKLDPAQSASRENLLEEQGSIALRQ	X;X;X;X;X;X;X;X;X;X;X;X;X;X;X;Phospho (STY);X;X;X;X;X;X;X;X;X;X;X;X;X;X;X	XXXXXXXPPPPPPPPPPPPPPPPPPPPPPPX	3.40951e-18	139.44	95.428	_KLDPAQSAS(ph)R_	KLDPAQS(0.061)AS(0.939)R	KLDPAQS(-11.9)AS(11.9)R	9	2	576.774	-0.29709	1.2122	1.2122	NaN	NaN	1.6521	1.6521	NaN	NaN	1.2883
A3KGU7;P16546;P16546-2	1550;1550;1530	A3KGU7;P16546;P16546-2	P16546	Spectrin alpha chain, brain	Spna2;Sptan1	>tr|A3KGU7|A3KGU7_MOUSE Protein Spna2 OS=Mus musculus GN=Spna2 PE=4 SV=1;>sp|P16546|SPTN1_MOUSE Spectrin alpha chain, non-erythrocytic 1 OS=Mus musculus GN=Sptan1 PE=1 SV=4;>sp|P16546-2|SPTN1_MOUSE Isoform 2 of Spectrin alpha chain, non-erythrocytic 1 OS=M	0.998305	27.7014	0.996943	25.1337	1.51646e-06	147.12					0.988443	19.3747	0.0457844	46.156	0.998305	27.7014	3.41651e-06	138.05		1	S	RLKAQMIEKRSKLGESQTLQQFSRDVDEIEA	X;X;X;X;X;X;X;X;X;X;X;X;X;X;X;Phospho (STY);X;X;X;X;X;X;X;X;X;X;X;X;X;X;X	XXXXXXXXXXXXPPPPPPPPPPPPXXXXXXX	1.51646e-06	147.12	138.05	_LGES(ph)QTLQQFSR_	LGES(0.998)QT(0.002)LQQFSR	LGES(27.7)QT(-27.7)LQQFS(-120.91)R	4	2	737.34	0.39904	1.5939	1.5939	NaN	NaN	1.6912	1.6912	NaN	NaN	1.3674
A3KGU7;P16546;P16546-2	1217;1217;1197	A3KGU7;P16546;P16546-2	P16546	Spectrin alpha chain, brain	Spna2;Sptan1	>tr|A3KGU7|A3KGU7_MOUSE Protein Spna2 OS=Mus musculus GN=Spna2 PE=4 SV=1;>sp|P16546|SPTN1_MOUSE Spectrin alpha chain, non-erythrocytic 1 OS=Mus musculus GN=Sptan1 PE=1 SV=4;>sp|P16546-2|SPTN1_MOUSE Isoform 2 of Spectrin alpha chain, non-erythrocytic 1 OS=M	1	87.4985	1	93.4937	8.41362e-10	208.28	1	114.862	1.29366e-06	173.72	1	89.5068	0.000543172	118.24	1	87.4985	1.99515e-06	166.38		1	S	VATFNSIKELNERWRSLQQLAEERSQLLGSA	X;X;X;X;X;X;X;X;X;X;X;X;X;X;X;Phospho (STY);X;X;X;X;X;X;X;X;X;X;X;X;X;X;X	XXXXXXXXXXXXXPPPPPPPPPPPXXXXXXX	8.41362e-10	208.28	87.498	_WRS(ph)LQQLAEER_	WRS(1)LQQLAEER	WRS(87.5)LQQLAEER	3	3	499.24	-0.41681	0.59637	0.59637	NaN	NaN	0.8175	0.8175	NaN	NaN	1.7246
E9Q921;A3KMF4;O88573;B1AVP1	390;382;382;390	E9Q921	E9Q921	AF4/FMR2 family member 1	Aff1;Aff1;Aff1;Aff1	>tr|E9Q921|E9Q921_MOUSE AF4/FMR2 family member 1 OS=Mus musculus GN=Aff1 PE=4 SV=1;>tr|A3KMF4|A3KMF4_MOUSE AF4/FMR2 family member 1 OS=Mus musculus GN=Aff1 PE=2 SV=1;>sp|O88573|AFF1_MOUSE AF4/FMR2 family member 1 OS=Mus musculus GN=Aff1 PE=2 SV=2;>tr|B1AVP	0.999187	30.897					0.878292	8.98115	3.53557e-09	142.45	0.999187	30.897	4.10216e-11	177.88						1	S	EPSRFPFPTKDPLHVSPATQSQKQYDTPSKT	X;X;X;X;X;X;X;X;X;X;X;X;X;X;X;Phospho (STY);X;X;X;X;X;X;X;X;X;X;X;X;X;X;X	XXXXXXXXXXPPPPPPPPPPPPPXXXXXXXX	4.10216e-11	177.88	142.54	_DPLHVS(ph)PATQSQK_	DPLHVS(0.999)PAT(0.001)QSQK	DPLHVS(30.9)PAT(-30.9)QS(-67.22)QK	6	2	744.348	-0.86887	0.8988	0.8988	NaN	NaN	0.87569	0.87569	NaN	NaN	NaN
E9Q921;A3KMF4;B1AVP1	583;575;583	E9Q921	E9Q921		Aff1;Aff1;Aff1	>tr|E9Q921|E9Q921_MOUSE AF4/FMR2 family member 1 OS=Mus musculus GN=Aff1 PE=4 SV=1;>tr|A3KMF4|A3KMF4_MOUSE AF4/FMR2 family member 1 OS=Mus musculus GN=Aff1 PE=2 SV=1;>tr|B1AVP1|B1AVP1_MOUSE AF4/FMR2 family member 1 (Fragment) OS=Mus musculus GN=Aff1 PE=4 S	1	106.174	1	51.5463	0.0236662	51.546					1	89.4845	0.000734062	89.484	1	106.174	0.000305007	106.17		1	S	GPSEGPQPGKRGCPKSPAQQEPPPRQTVGSK	X;X;X;X;X;X;X;X;X;X;X;X;X;X;X;Phospho (STY);X;X;X;X;X;X;X;X;X;X;X;X;X;X;X	XXXXXXXXXXXPPPPPPPPPPPPPPXXXXXX	0.000305007	106.17	106.17	_GCPKS(ph)PAQQEPPPR_	GCPKS(1)PAQQEPPPR	GCPKS(106.17)PAQQEPPPR	5	3	543.58	-0.80349	0.70055	0.70055	NaN	NaN	0.99859	0.99859	NaN	NaN	NaN
E9Q921;A3KMF4;O88573;B1AVP1	140;132;132;140	E9Q921	E9Q921	AF4/FMR2 family member 1	Aff1;Aff1;Aff1;Aff1	>tr|E9Q921|E9Q921_MOUSE AF4/FMR2 family member 1 OS=Mus musculus GN=Aff1 PE=4 SV=1;>tr|A3KMF4|A3KMF4_MOUSE AF4/FMR2 family member 1 OS=Mus musculus GN=Aff1 PE=2 SV=1;>sp|O88573|AFF1_MOUSE AF4/FMR2 family member 1 OS=Mus musculus GN=Aff1 PE=2 SV=2;>tr|B1AVP	0.999988	49.3203	0.999785	36.6693	0.00018788	120.84	0.998699	28.8532	7.70252e-05	139.89	0.999868	38.7896	1.54554e-05	162.31	0.999988	49.3203	8.0904e-16	198.55		1	S	HTSAPGSRPVGNISHSPKMAQPRMEPSLHTK	X;X;X;X;X;X;X;X;X;X;X;X;X;X;X;Phospho (STY);X;X;X;X;X;X;X;X;X;X;X;X;X;X;X	XXXXXXXXPPPPPPPPPPXXXXXXXXXXXXX	8.0904e-16	198.55	198.55	_PVGNISHS(ph)PK_	PVGNISHS(1)PK	PVGNIS(-49.32)HS(49.32)PK	8	2	558.266	-0.5217	0.81124	0.81124	NaN	NaN	1.1267	1.1267	NaN	NaN	NaN
A5D6P2;G3XA13;Q99NH2;B7ZNY3;F6S7Z1;E0CXL4;E0CZE2;E0CY24;E0CZ83;Q99NH2-2;Q99NH2-4;E0CXR8;F6TSJ9;E0CX45;F6UGU7;Q99NH2-3;E9PYJ2;Q99NH2-5;Q4JJC0	383;383;383;383;403;339;383;339;383;383;248;383;386;339;315;383;383;248;105	A5D6P2	A5D6P2	Partitioning defective 3 homolog	Pard3;Pard3;Pard3;Pard3;Pard3;Pard3;Pard3;Pard3;Pard3;Pard3;Pard3;Pard3;Pard3;Pard3;Pard3	>tr|A5D6P2|A5D6P2_MOUSE Par-3 (Partitioning defective 3) homolog (C. elegans) OS=Mus musculus GN=Pard3 PE=2 SV=1;>tr|G3XA13|G3XA13_MOUSE Par-3 (Partitioning defective 3) homolog (C. elegans) OS=Mus musculus GN=Pard3 PE=4 SV=1;>sp|Q99NH2|PARD3_MOUSE Partiti	0.999992	51.0934	0.999676	34.8971	0.0135313	60.628	0.999874	39.0005	0.00110077	98.942	0.999992	51.0934	0.00103143	99.844	0.999954	43.3355	6.72453e-09	130.27		1;2	S	QLSQREKNNYSPGRFSPDSHCVANRSVANNA	X;X;X;X;X;X;X;X;X;X;Phospho (STY);X;X;X;X;Phospho (STY);X;X;X;X;X;X;X;X;X;X;X;X;X;X;X	XXXXXXXPPPPPPPPPPPPPPPPPPXXXXXX	6.72453e-09	130.27	94.688	_FS(ph)PDSHCVANR_	FS(1)PDSHCVANR	FS(51.09)PDS(-51.09)HCVANR	2	2	685.271	-0.23229	0.74484	0.74484	1.0234	NaN	0.77767	0.77767	0.92991	NaN	NaN
A5D6P2;G3XA13;Q99NH2;B7ZNY3;E0CXL4;E0CZE2;Q99NH2-2;Q99NH2-4;E0CX45;F6UGU7;F6URI7	834;834;834;834;790;837;834;699;780;756;72	A5D6P2	A5D6P2	Partitioning defective 3 homolog	Pard3;Pard3;Pard3;Pard3;Pard3;Pard3;Pard3;Pard3;Pard3	>tr|A5D6P2|A5D6P2_MOUSE Par-3 (Partitioning defective 3) homolog (C. elegans) OS=Mus musculus GN=Pard3 PE=2 SV=1;>tr|G3XA13|G3XA13_MOUSE Par-3 (Partitioning defective 3) homolog (C. elegans) OS=Mus musculus GN=Pard3 PE=4 SV=1;>sp|Q99NH2|PARD3_MOUSE Partiti	0.999999	58.3189	0.837288	7.11456	0.0219495	52.372	0.99999	49.8767	0.000872602	86.497	0.999999	58.3189	3.99306e-05	113.65	0.999895	39.7975	0.00154473	80.522		1	S	GFGRQSMSEKRTKQFSDASQLDFVKTRKSKS	X;X;X;X;X;X;X;X;X;X;X;X;X;X;X;Phospho (STY);X;X;X;X;X;X;X;X;X;X;X;X;X;X;Phospho (STY)	XXXXXXXXXXXXXPPPPPPPPPPPPXXXXXX	3.99306e-05	113.65	113.65	_QFS(ph)DASQLDFVK_	QFS(1)DASQLDFVK	QFS(58.32)DAS(-58.32)QLDFVK	3	2	732.824	0.45641	1.0819	1.0819	NaN	NaN	1.206	1.206	NaN	NaN	NaN
A5D6P2;G3XA13;Q99NH2;B7ZNY3;E0CXL4;E0CZE2;Q99NH2-2;Q99NH2-4;E0CX45;F6UGU7;F6URI7	837;837;837;837;793;840;837;702;783;759;75	A5D6P2	A5D6P2	Partitioning defective 3 homolog	Pard3;Pard3;Pard3;Pard3;Pard3;Pard3;Pard3;Pard3;Pard3	>tr|A5D6P2|A5D6P2_MOUSE Par-3 (Partitioning defective 3) homolog (C. elegans) OS=Mus musculus GN=Pard3 PE=2 SV=1;>tr|G3XA13|G3XA13_MOUSE Par-3 (Partitioning defective 3) homolog (C. elegans) OS=Mus musculus GN=Pard3 PE=4 SV=1;>sp|Q99NH2|PARD3_MOUSE Partiti	0.739875	4.53975					0.739875	4.53975	0.00080665	87.083										1	S	RQSMSEKRTKQFSDASQLDFVKTRKSKSMDL	X;X;X;X;X;X;X;X;X;X;X;X;X;X;X;Phospho (STY);X;X;X;X;X;X;X;X;X;X;X;Phospho (STY);Oxidation (M);X;X	XXXXXXXXXXPPPPPPPPPPPPXXXXXXXXX	0.00080665	87.083	87.083	_QFSDAS(ph)QLDFVK_	QFS(0.26)DAS(0.74)QLDFVK	QFS(-4.54)DAS(4.54)QLDFVK	6	2	732.824	0.14648	1.0337	1.0337	NaN	NaN	1.2258	1.2258	NaN	NaN	NaN
A5D6P2;E0CZE2;F6URI7	849;852;87	A5D6P2	A5D6P2		Pard3;Pard3;Pard3	>tr|A5D6P2|A5D6P2_MOUSE Par-3 (Partitioning defective 3) homolog (C. elegans) OS=Mus musculus GN=Pard3 PE=2 SV=1;>tr|E0CZE2|E0CZE2_MOUSE Partitioning defective 3 homolog (Fragment) OS=Mus musculus GN=Pard3 PE=4 SV=1;>tr|F6URI7|F6URI7_MOUSE Partitioning def	1	84.7708	0.999975	45.9547	0.0128861	62.68	1	77.3239	0.00300288	84.297					1	84.7708	0.000368856	111.12		1	S	SDASQLDFVKTRKSKSMDLGIADETKLNTVD	Phospho (STY);X;X;Phospho (STY);X;X;X;X;X;X;X;X;X;X;X;Phospho (STY);Oxidation (M);X;X;X;X;X;X;X;X;X;X;X;X;X;X	XXXXXXXXXXXXXXXPPPPPPPPPPPXXXXX	0.000368856	111.12	88.092	_S(ph)MDLGIADETK_	S(1)MDLGIADETK	S(84.77)MDLGIADET(-84.77)K	1	2	630.265	0.9359	0.68616	0.68616	NaN	NaN	0.94215	0.94215	NaN	NaN	NaN
A5D6P2;G3XA13;Q99NH2;B7ZNY3;F6S7Z1;E0CXL4;E0CZE2;E0CY24;E0CZ83;Q99NH2-2;Q99NH2-4;E0CXR8;F6TSJ9;E0CX45;F6UGU7;Q99NH2-3;E9PYJ2;Q99NH2-5;F6TB42	692;692;692;692;712;648;692;635;679;692;557;692;682;635;611;692;692;557;64	A5D6P2	A5D6P2	Partitioning defective 3 homolog	Pard3;Pard3;Pard3;Pard3;Pard3;Pard3;Pard3;Pard3;Pard3;Pard3;Pard3;Pard3;Pard3;Pard3;Pard3	>tr|A5D6P2|A5D6P2_MOUSE Par-3 (Partitioning defective 3) homolog (C. elegans) OS=Mus musculus GN=Pard3 PE=2 SV=1;>tr|G3XA13|G3XA13_MOUSE Par-3 (Partitioning defective 3) homolog (C. elegans) OS=Mus musculus GN=Pard3 PE=4 SV=1;>sp|Q99NH2|PARD3_MOUSE Partiti	0.855051	7.70776					0.5	0	0.000746708	76.015	0.52319	0.403382	4.91272e-05	104.95	0.855051	7.70776	2.3373e-05	111.45		1	S	QLIVARRISRCNELRSPGSPAAPELPIETEL	X;X;X;X;X;X;X;X;X;X;X;X;X;X;X;Phospho (STY);X;X;X;X;X;X;X;X;X;X;X;X;X;X;X	XXXXXXXXXXXXXXXPPPPPPPPPPPPPPPP	2.3373e-05	111.45	95.48	_S(ph)PGSPAAPELPIETELDDR_	S(0.855)PGS(0.145)PAAPELPIETELDDR	S(7.71)PGS(-7.71)PAAPELPIET(-89.51)ELDDR	1	2	1037.47	0.64393	0.99773	0.99773	NaN	NaN	0.96925	0.96925	NaN	NaN	NaN
A5D6P2;G3XA13;Q99NH2;B7ZNY3;F6S7Z1;E0CXL4;E0CZE2;E0CY24;E0CZ83;Q99NH2-2;Q99NH2-4;E0CXR8;F6TSJ9;E0CX45;F6UGU7;Q99NH2-3;E9PYJ2;Q99NH2-5;F6TB42	695;695;695;695;715;651;695;638;682;695;560;695;685;638;614;695;695;560;67	A5D6P2	A5D6P2	Partitioning defective 3 homolog	Pard3;Pard3;Pard3;Pard3;Pard3;Pard3;Pard3;Pard3;Pard3;Pard3;Pard3;Pard3;Pard3;Pard3;Pard3	>tr|A5D6P2|A5D6P2_MOUSE Par-3 (Partitioning defective 3) homolog (C. elegans) OS=Mus musculus GN=Pard3 PE=2 SV=1;>tr|G3XA13|G3XA13_MOUSE Par-3 (Partitioning defective 3) homolog (C. elegans) OS=Mus musculus GN=Pard3 PE=4 SV=1;>sp|Q99NH2|PARD3_MOUSE Partiti	0.852963	7.63504					0.800988	6.04952	0.000746708	76.015	0.499999	0	4.91272e-05	104.95	0.852963	7.63504	2.3373e-05	111.45		1	S	VARRISRCNELRSPGSPAAPELPIETELDDR	X;X;X;X;X;X;X;X;X;X;X;X;X;X;X;Phospho (STY);X;X;X;X;X;X;X;X;X;X;X;X;X;X;X	XXXXXXXXXXXXPPPPPPPPPPPPPPPPPPP	2.3373e-05	111.45	104.52	_SPGS(ph)PAAPELPIETELDDR_	S(0.147)PGS(0.853)PAAPELPIETELDDR	S(-7.64)PGS(7.64)PAAPELPIET(-66.69)ELDDR	4	2	1037.47	0.45327	0.95008	0.95008	NaN	NaN	1.0233	1.0233	NaN	NaN	NaN
A5D6P2;G3XA13;Q99NH2;B7ZNY3;F6S7Z1;E0CZE2;E0CZ83;Q99NH2-2;Q99NH2-4;E0CXR8;F6TSJ9;Q99NH2-3;E9PYJ2;Q99NH2-5	220;220;220;220;240;220;220;220;85;220;223;220;220;85	A5D6P2	A5D6P2	Partitioning defective 3 homolog	Pard3;Pard3;Pard3;Pard3;Pard3;Pard3;Pard3;Pard3;Pard3;Pard3	>tr|A5D6P2|A5D6P2_MOUSE Par-3 (Partitioning defective 3) homolog (C. elegans) OS=Mus musculus GN=Pard3 PE=2 SV=1;>tr|G3XA13|G3XA13_MOUSE Par-3 (Partitioning defective 3) homolog (C. elegans) OS=Mus musculus GN=Pard3 PE=4 SV=1;>sp|Q99NH2|PARD3_MOUSE Partiti	0.499123	0	0.499123	0	0.00284758	75.589									0.492911	0	0.0204727	54.524			S	DPSSWSNQFQRDNARSSLSASHPMVDRWLEK	X;X;X;X;X;X;X;X;X;X;X;X;X;X;X;Phospho (STY);X;X;X;X;X;X;X;Oxidation (M);X;X;X;X;X;X;X	XXXXXXXXXXXXXXXPPPPPPPPPPPPXXXX	0.00284758	75.589	75.589	_S(ph)SLSASHPM(ox)VDR_	S(0.499)S(0.499)LS(0.002)ASHPMVDR	S(0)S(0)LS(-24.78)AS(-37.25)HPMVDR	1	2	691.792	-0.25534
A5D6P2;G3XA13;Q99NH2;B7ZNY3;F6S7Z1;E0CZE2;E0CZ83;Q99NH2-2;Q99NH2-4;E0CXR8;F6TSJ9;Q99NH2-3;E9PYJ2;Q99NH2-5	221;221;221;221;241;221;221;221;86;221;224;221;221;86	A5D6P2	A5D6P2	Partitioning defective 3 homolog	Pard3;Pard3;Pard3;Pard3;Pard3;Pard3;Pard3;Pard3;Pard3;Pard3	>tr|A5D6P2|A5D6P2_MOUSE Par-3 (Partitioning defective 3) homolog (C. elegans) OS=Mus musculus GN=Pard3 PE=2 SV=1;>tr|G3XA13|G3XA13_MOUSE Par-3 (Partitioning defective 3) homolog (C. elegans) OS=Mus musculus GN=Pard3 PE=4 SV=1;>sp|Q99NH2|PARD3_MOUSE Partiti	0.861414	7.95083	0.861414	7.95083	0.00284758	75.589									0.492911	0	0.0204727	54.524		1	S	PSSWSNQFQRDNARSSLSASHPMVDRWLEKQ	X;X;X;X;X;X;X;X;X;X;X;X;X;X;X;Phospho (STY);X;X;X;X;X;X;X;X;X;X;X;X;X;X;X	XXXXXXXXXXXXXXPPPPPPPPPPPPXXXXX	0.00284758	75.589	68.44	_SS(ph)LSASHPMVDR_	S(0.138)S(0.861)LSASHPMVDR	S(-7.95)S(7.95)LS(-32.55)AS(-45.02)HPMVDR	2	2	683.795	-0.2306	1.0622	1.0622	NaN	NaN	1.4552	1.4552	NaN	NaN	NaN
A5D6P2;G3XA13;Q99NH2;B7ZNY3;F6S7Z1;E0CXL4;E0CZE2;E0CY24;E0CZ83;Q99NH2-2;Q99NH2-4;E0CXR8;F6TSJ9;E0CX45;F6UGU7;Q99NH2-3;E9PYJ2;Q99NH2-5	174;174;174;174;194;174;174;174;174;174;39;174;177;174;150;174;174;39	A5D6P2	A5D6P2	Partitioning defective 3 homolog	Pard3;Pard3;Pard3;Pard3;Pard3;Pard3;Pard3;Pard3;Pard3;Pard3;Pard3;Pard3;Pard3;Pard3	>tr|A5D6P2|A5D6P2_MOUSE Par-3 (Partitioning defective 3) homolog (C. elegans) OS=Mus musculus GN=Pard3 PE=2 SV=1;>tr|G3XA13|G3XA13_MOUSE Par-3 (Partitioning defective 3) homolog (C. elegans) OS=Mus musculus GN=Pard3 PE=4 SV=1;>sp|Q99NH2|PARD3_MOUSE Partiti	0.999907	40.6002	0.999679	34.9519	0.00153115	108.9	0.997044	25.4716	0.00641092	91.313	0.999097	30.7113	0.00298518	102.53	0.999907	40.6002	0.00343419	100.69		1	S	NFSSEEPSRKNPTRWSTTAGFLKQNTAGSPK	X;X;X;X;X;X;X;X;X;X;X;X;X;X;X;Phospho (STY);X;X;X;X;X;X;X;X;X;X;X;X;X;X;X	XXXXXXXXXXXXXXPPPPPPPPPXXXXXXXX	0.00153115	108.9	77.744	_WS(ph)TTAGFLK_	WS(1)TTAGFLK	WS(40.6)T(-40.6)T(-52.4)AGFLK	2	2	545.752	0.28783	0.95415	0.95415	NaN	NaN	0.94669	0.94669	NaN	NaN	NaN
A5D6P6;Q9D030	55;55	A5D6P6	A5D6P6	Twist-related protein 2	Twist2;Twist2	>tr|A5D6P6|A5D6P6_MOUSE Twist homolog 2 (Drosophila) OS=Mus musculus GN=Twist2 PE=2 SV=1;>sp|Q9D030|TWST2_MOUSE Twist-related protein 2 OS=Mus musculus GN=Twist2 PE=1 SV=1	0.999113	30.5287	0.841291	7.25565	8.7188e-05	113.4	0.813696	7.1912	0.00461717	62.377					0.999113	30.5287	4.49768e-43	152		1	S	SEDGSPTPGKRGKKGSPSAQSFEELQSQRIL	X;X;X;X;X;X;X;X;X;X;X;X;X;X;X;Phospho (STY);X;X;X;X;X;X;X;X;X;X;X;X;X;X;X	XXXXXXXXXXXXXPPPPPPPPPPPPPPPPXX	4.49768e-43	152	152	_KGS(ph)PSAQSFEELQSQR_	KGS(0.999)PS(0.001)AQSFEELQSQR	KGS(30.53)PS(-30.53)AQS(-56.77)FEELQS(-121.34)QR	3	2	929.92	-1.1167	0.65537	0.65537	NaN	NaN	0.88982	0.88982	NaN	NaN	NaN
A5D6P6;Q9D030	57;57	A5D6P6	A5D6P6	Twist-related protein 2	Twist2;Twist2	>tr|A5D6P6|A5D6P6_MOUSE Twist homolog 2 (Drosophila) OS=Mus musculus GN=Twist2 PE=2 SV=1;>sp|Q9D030|TWST2_MOUSE Twist-related protein 2 OS=Mus musculus GN=Twist2 PE=1 SV=1	0.499824	0	0.499824	0	0.00029101	90.759									0.498981	0	0.000181758	142.1			S	DGSPTPGKRGKKGSPSAQSFEELQSQRILAN	X;X;X;X;X;X;X;X;X;X;X;X;X;X;X;X;X;X;X;X;X;X;X;X;X;X;X;X;X;X;X	XXXXXXXXXXXXXXXXXXXXXXXXXXXXXXX	1.68522e-05	142.1	90.759	_KGS(ph)PSAQSFEELQSQR_	KGS(0.5)PS(0.5)AQSFEELQSQR	KGS(0)PS(0)AQS(-31.51)FEELQS(-88.7)QR	5	3	620.283	0.12223
A5D6P6;Q9D030	60;60	A5D6P6	A5D6P6	Twist-related protein 2	Twist2;Twist2	>tr|A5D6P6|A5D6P6_MOUSE Twist homolog 2 (Drosophila) OS=Mus musculus GN=Twist2 PE=2 SV=1;>sp|Q9D030|TWST2_MOUSE Twist-related protein 2 OS=Mus musculus GN=Twist2 PE=1 SV=1	0.936051	14.6668	0.762911	8.08634	0.00182278	71.98					0.936051	14.6668	0.00955824	55.755						1	S	PTPGKRGKKGSPSAQSFEELQSQRILANVRE	X;X;X;X;X;X;X;X;X;X;X;X;X;X;X;Phospho (STY);X;X;X;X;X;X;X;X;X;X;X;X;X;X;X	XXXXXXXXPPPPPPPPPPPPPPPPXXXXXXX	0.00182278	71.98	55.755	_KGSPSAQS(ph)FEELQSQR_	KGS(0.032)PS(0.032)AQS(0.936)FEELQSQR	KGS(-14.67)PS(-14.67)AQS(14.67)FEELQS(-45.47)QR	8	3	620.283	-0.99866	0.91878	0.91878	NaN	NaN	1.0722	1.0722	NaN	NaN	NaN
A6H5X4;A6H5X4-3;A6H5X4-2	17;17;17	A6H5X4	A6H5X4	PHD finger protein 11	Phf11	>sp|A6H5X4|PH11L_MOUSE PHD finger protein 11-like OS=Mus musculus GN=Phf11l PE=2 SV=1;>sp|A6H5X4-3|PH11L_MOUSE Isoform 3 of PHD finger protein 11-like OS=Mus musculus GN=Phf11l;>sp|A6H5X4-2|PH11L_MOUSE Isoform 2 of PHD finger protein 11-like OS=Mus musculu	1	108.697	1	93.2576	0.0364618	93.258	1	110.382	0.0154926	110.38					1	108.697	0.0022337	136.02		1	S	AQETAPPCGPVSRGDSPIIEKMEKRTCALCP	X;X;X;X;X;X;X;X;X;X;X;X;X;X;X;Phospho (STY);X;X;X;X;X;X;X;X;X;X;X;X;X;X;X	XXXXXXXXXXXXXPPPPPPPPXXXXXXXXXX	0.0022337	136.02	108.7	_GDS(ph)PIIEK_	GDS(1)PIIEK	GDS(108.7)PIIEK	3	2	469.715	-0.059217	2.7266	2.7266	NaN	NaN	2.9399	2.9399	NaN	NaN	NaN
A6H5X4;A6H5X4-3;A6H5X4-2;B4XVP9	169;169;169;188	A6H5X4	A6H5X4	PHD finger protein 11	Phf11;Gm6907	>sp|A6H5X4|PH11L_MOUSE PHD finger protein 11-like OS=Mus musculus GN=Phf11l PE=2 SV=1;>sp|A6H5X4-3|PH11L_MOUSE Isoform 3 of PHD finger protein 11-like OS=Mus musculus GN=Phf11l;>sp|A6H5X4-2|PH11L_MOUSE Isoform 2 of PHD finger protein 11-like OS=Mus musculu	0.997054	25.2941	0.930753	11.2843	0.00612498	99.927	0.970857	15.2262	0.000281014	133.16	0.997054	25.2941	0.00260748	109.84	0.989282	19.6521	8.38159e-06	150.26		1	S	DDPSMKKKRGKNKRLSSGPPAQPKTMKCSNA	X;X;X;X;X;X;X;X;X;X;X;X;X;X;X;Phospho (STY);X;X;X;X;X;X;X;X;X;X;X;X;X;X;X	XXXXXXXXXXXXXPPPPPPPPPPPXXXXXXX	8.38159e-06	150.26	101.3	_RLS(ph)SGPPAQPK_	RLS(0.997)S(0.003)GPPAQPK	RLS(25.29)S(-25.29)GPPAQPK	3	2	609.306	-0.36838	0.080204	0.080204	NaN	NaN	0.10318	0.10318	NaN	NaN	NaN
A6H5X4;A6H5X4-3;A6H5X4-2;B4XVP9	170;170;170;189	A6H5X4	A6H5X4	PHD finger protein 11	Phf11;Gm6907	>sp|A6H5X4|PH11L_MOUSE PHD finger protein 11-like OS=Mus musculus GN=Phf11l PE=2 SV=1;>sp|A6H5X4-3|PH11L_MOUSE Isoform 3 of PHD finger protein 11-like OS=Mus musculus GN=Phf11l;>sp|A6H5X4-2|PH11L_MOUSE Isoform 2 of PHD finger protein 11-like OS=Mus musculu	0.771495	5.28437	0.771495	5.28437	0.00128949	115.12														1	S	DPSMKKKRGKNKRLSSGPPAQPKTMKCSNAK	X;X;X;X;X;X;X;X;X;X;X;X;X;X;X;Phospho (STY);X;X;X;X;X;X;X;X;X;X;X;X;X;X;X	XXXXXXXXXXXXPPPPPPPPPPPXXXXXXXX	0.00128949	115.12	115.12	_RLSS(ph)GPPAQPK_	RLS(0.229)S(0.771)GPPAQPK	RLS(-5.28)S(5.28)GPPAQPK	4	2	609.306	-0.81379	0.087187	0.087187	NaN	NaN	0.12435	0.12435	NaN	NaN	NaN
A6H6A5;Q00175	20;20	A6H6A5	A6H6A5	Progesterone receptor	Pgr;Pgr	>tr|A6H6A5|A6H6A5_MOUSE Progesterone receptor OS=Mus musculus GN=Pgr PE=2 SV=1;>sp|Q00175|PRGR_MOUSE Progesterone receptor OS=Mus musculus GN=Pgr PE=1 SV=1	0.994039	26.407					0.994039	26.407	1.04343e-06	74.525										1	S	QAKDPQVLHTSGASPSPPHIGSPLLARLDSG	X;X;X;X;X;X;X;X;X;X;X;X;X;X;X;Phospho (STY);X;X;X;X;X;X;X;X;X;X;X;X;X;X;X	XXXPPPPPPPPPPPPPPPPPPPPPPPPXXXX	1.04343e-06	74.525	74.525	_DPQVLHTSGASPS(ph)PPHIGSPLLAR_	DPQVLHT(0.002)S(0.001)GAS(0.002)PS(0.994)PPHIGS(0.001)PLLAR	DPQVLHT(-26.41)S(-31.79)GAS(-27.41)PS(26.41)PPHIGS(-29.1)PLLAR	13	3	838.755	0.098651	5.7968	5.7968	NaN	NaN	7.1295	7.1295	NaN	NaN	NaN
A6H6A5;Q00175	26;26	A6H6A5	A6H6A5	Progesterone receptor	Pgr;Pgr	>tr|A6H6A5|A6H6A5_MOUSE Progesterone receptor OS=Mus musculus GN=Pgr PE=2 SV=1;>sp|Q00175|PRGR_MOUSE Progesterone receptor OS=Mus musculus GN=Pgr PE=1 SV=1	0.927207	11.1916					0.927207	11.1916	0.000867824	54.668										1	S	VLHTSGASPSPPHIGSPLLARLDSGPFQGSQ	X;X;X;X;X;X;X;X;X;X;X;X;X;X;X;Phospho (STY);X;X;X;X;X;X;X;X;X;X;X;X;X;X;X	PPPPPPPPPPPPPPPPPPPPPXXXXXXXXXX	0.000867824	54.668	54.668	_DPQVLHTSGASPSPPHIGS(ph)PLLAR_	DPQVLHTSGAS(0.002)PS(0.07)PPHIGS(0.927)PLLAR	DPQVLHT(-41.79)S(-41.79)GAS(-26.25)PS(-11.19)PPHIGS(11.19)PLLAR	19	4	629.318	-0.25171	4.4866	4.4866	NaN	NaN	5.4473	5.4473	NaN	NaN	NaN
A6H6A5;Q00175;E9QPW3	282;282;117	A6H6A5	A6H6A5	Progesterone receptor	Pgr;Pgr;Pgr	>tr|A6H6A5|A6H6A5_MOUSE Progesterone receptor OS=Mus musculus GN=Pgr PE=2 SV=1;>sp|Q00175|PRGR_MOUSE Progesterone receptor OS=Mus musculus GN=Pgr PE=1 SV=1;>tr|E9QPW3|E9QPW3_MOUSE Progesterone receptor OS=Mus musculus GN=Pgr PE=3 SV=1	0.997785	26.5371	0.997785	26.5371	0.00367636	103.39														1	S	TLVPKEDSRFSAPRVSLEQDSPIAPGRSPLA	X;X;X;X;X;X;X;X;X;X;X;X;X;X;X;Phospho (STY);X;X;X;X;X;X;X;X;X;X;X;X;X;X;X	XXXXXXXXXXXXXXPPPPPPPPPPPPPXXXX	0.00113894	103.39	103.39	_VS(ph)LEQDSPIAPGR_	VS(0.998)LEQDS(0.002)PIAPGR	VS(26.54)LEQDS(-26.54)PIAPGR	2	2	724.843	0.42406	0.9897	0.9897	NaN	NaN	1.2477	1.2477	NaN	NaN	NaN
A6H6A5;Q00175;E9QPW3	287;287;122	A6H6A5	A6H6A5	Progesterone receptor	Pgr;Pgr;Pgr	>tr|A6H6A5|A6H6A5_MOUSE Progesterone receptor OS=Mus musculus GN=Pgr PE=2 SV=1;>sp|Q00175|PRGR_MOUSE Progesterone receptor OS=Mus musculus GN=Pgr PE=1 SV=1;>tr|E9QPW3|E9QPW3_MOUSE Progesterone receptor OS=Mus musculus GN=Pgr PE=3 SV=1	0.999997	55.8583	0.999996	54.5041	0.00401486	100.23	0.999994	52.1892	0.00266072	111.34					0.999997	55.8583	0.000331078	139.49		1	S	EDSRFSAPRVSLEQDSPIAPGRSPLATTVVD	X;X;X;X;X;X;X;X;X;X;X;X;X;X;X;Phospho (STY);X;X;X;X;X;X;X;X;X;X;X;X;X;X;X	XXXXXXXXXPPPPPPPPPPPPPXXXXXXXXX	0.000331078	139.49	139.49	_VSLEQDS(ph)PIAPGR_	VSLEQDS(1)PIAPGR	VS(-55.86)LEQDS(55.86)PIAPGR	7	2	724.843	-0.030606	3.1032	3.1032	NaN	NaN	4.0049	4.0049	NaN	NaN	NaN
A6H6A9;A6H6A9-2	118;90	A6H6A9	A6H6A9	Rab GTPase-activating protein 1-like	Rabgap1l	>sp|A6H6A9|RBG1L_MOUSE Rab GTPase-activating protein 1-like OS=Mus musculus GN=Rabgap1l PE=1 SV=1;>sp|A6H6A9-2|RBG1L_MOUSE Isoform 2 of Rab GTPase-activating protein 1-like OS=Mus musculus GN=Rabgap1l	0.879029	8.61655	0.499642	0	1.27018e-05	119.37	0.879029	8.61655	1.21492e-07	129.51	0.499138	0	3.77694e-05	110.6	0.499771	0	4.9206e-11	136.68		1	S	LILDPSNTEISTPRPSSPSRFPEEDSVLFNK	X;X;X;X;X;X;X;X;X;X;X;X;X;X;X;Phospho (STY);X;X;X;X;X;X;X;X;X;X;X;X;X;X;X	XXXXXXXXXXXXXXPPPPPPPPPPPPPPPPP	4.9206e-11	136.68	128.06	_PS(ph)SPSRFPEEDSVLFNK_	PS(0.879)S(0.121)PSRFPEEDSVLFNK	PS(8.62)S(-8.62)PS(-39.75)RFPEEDS(-92.54)VLFNK	2	3	672.642	0.077993	0.71084	0.71084	NaN	NaN	0.9569	0.9569	NaN	NaN	NaN
A6H6A9;A6H6A9-2	119;91	A6H6A9	A6H6A9	Rab GTPase-activating protein 1-like	Rabgap1l	>sp|A6H6A9|RBG1L_MOUSE Rab GTPase-activating protein 1-like OS=Mus musculus GN=Rabgap1l PE=1 SV=1;>sp|A6H6A9-2|RBG1L_MOUSE Isoform 2 of Rab GTPase-activating protein 1-like OS=Mus musculus GN=Rabgap1l	0.894507	9.29861	0.894507	9.29861	4.50589e-08	133.93	0.888412	9.01356	2.74863e-16	149.36	0.859025	7.8877	3.9411e-06	124.76	0.868035	8.19787	4.9206e-11	136.68		1	S	ILDPSNTEISTPRPSSPSRFPEEDSVLFNKL	X;X;X;X;X;X;X;X;X;X;X;X;X;X;X;Phospho (STY);X;X;X;X;X;X;X;X;X;X;X;X;X;X;X	XXXXXXXXXXXXXPPPPPPPPPPPPPPPPPX	2.74863e-16	149.36	133.93	_PSS(ph)PSRFPEEDSVLFNK_	PS(0.105)S(0.895)PSRFPEEDSVLFNK	PS(-9.3)S(9.3)PS(-33.91)RFPEEDS(-101.78)VLFNK	3	3	672.642	0.147	0.84744	0.84744	NaN	NaN	0.88612	0.88612	NaN	NaN	NaN
A6H6A9;A6H6A9-2	121;93	A6H6A9	A6H6A9	Rab GTPase-activating protein 1-like	Rabgap1l	>sp|A6H6A9|RBG1L_MOUSE Rab GTPase-activating protein 1-like OS=Mus musculus GN=Rabgap1l PE=1 SV=1;>sp|A6H6A9-2|RBG1L_MOUSE Isoform 2 of Rab GTPase-activating protein 1-like OS=Mus musculus GN=Rabgap1l	0.973759	18.7397					0.973759	18.7397	3.84794e-05	110.38										1	S	DPSNTEISTPRPSSPSRFPEEDSVLFNKLTY	X;X;X;X;X;X;X;X;X;X;X;X;X;X;X;Phospho (STY);X;X;X;X;X;X;X;X;X;X;X;X;X;X;X	XXXXXXXXXXXPPPPPPPPPPPPPPPPPXXX	3.84794e-05	110.38	110.38	_PSSPS(ph)RFPEEDSVLFNK_	PS(0.013)S(0.013)PS(0.974)RFPEEDSVLFNK	PS(-18.74)S(-18.74)PS(18.74)RFPEEDS(-36.69)VLFNK	5	2	1008.46	0.40403	0.72102	0.72102	NaN	NaN	0.97904	0.97904	NaN	NaN	NaN
A6H8H2-2;A6H8H2;E9Q449;F6WXD7	1020;971;1020;198	A6H8H2-2	A6H8H2-2		Dennd4c;Dennd4c;Dennd4c	>sp|A6H8H2-2|DEN4C_MOUSE Isoform 2 of DENN domain-containing protein 4C OS=Mus musculus GN=Dennd4c;>sp|A6H8H2|DEN4C_MOUSE DENN domain-containing protein 4C OS=Mus musculus GN=Dennd4c PE=1 SV=1;>tr|E9Q449|E9Q449_MOUSE DENN domain-containing protein 4C OS=Mu	0.998697	29.7629	0.986917	18.9513	5.03038e-10	89.507	0.997602	26.2724	4.10312e-36	159.01					0.998697	29.7629	9.79694e-13	125.23		1	S	SAIVSKHLQPTPEPQSPTEPPAWGSSIVKVP	X;X;X;X;X;X;X;X;X;X;X;X;X;X;X;Phospho (STY);X;X;X;X;X;X;X;X;X;X;X;X;X;X;X	XXXXXXPPPPPPPPPPPPPPPPPPPPPPPXX	4.10312e-36	159.01	111.57	_HLQPTPEPQS(ph)PTEPPAWGSSIVK_	HLQPTPEPQS(0.999)PT(0.001)EPPAWGSSIVK	HLQPT(-36.04)PEPQS(29.76)PT(-29.76)EPPAWGS(-86.89)S(-86.89)IVK	10	3	855.079	-0.28719	0.52591	0.52591	NaN	NaN	0.69228	0.69228	NaN	NaN	NaN
A6H8H2-2;A6H8H2;E9Q449	740;740;740	A6H8H2-2	A6H8H2-2		Dennd4c;Dennd4c	>sp|A6H8H2-2|DEN4C_MOUSE Isoform 2 of DENN domain-containing protein 4C OS=Mus musculus GN=Dennd4c;>sp|A6H8H2|DEN4C_MOUSE DENN domain-containing protein 4C OS=Mus musculus GN=Dennd4c PE=1 SV=1;>tr|E9Q449|E9Q449_MOUSE DENN domain-containing protein 4C OS=Mu	0.834212	9.83411					0.834212	9.83411	0.0187717	90.379					0.439622	0	0.000462231	114.52		1	S	KLCFNRHPPGSSITNSPALMAKRTKQEIKTA	X;X;X;X;X;X;X;X;X;X;X;X;X;X;X;Phospho (STY);X;X;X;X;X;X;X;X;X;X;X;X;X;X;X	XXXXXXPPPPPPPPPPPPPPPPXXXXXXXXX	0.000462231	114.52	90.379	_HPPGSSITNS(ph)PALMAK_	HPPGS(0.025)S(0.087)IT(0.054)NS(0.834)PALMAK	HPPGS(-15.24)S(-9.83)IT(-11.88)NS(9.83)PALMAK	10	2	844.397	1.2477
A6H8H2-2;A6H8H2	1684;1635	A6H8H2-2	A6H8H2-2		Dennd4c	>sp|A6H8H2-2|DEN4C_MOUSE Isoform 2 of DENN domain-containing protein 4C OS=Mus musculus GN=Dennd4c;>sp|A6H8H2|DEN4C_MOUSE DENN domain-containing protein 4C OS=Mus musculus GN=Dennd4c PE=1 SV=1	0.917033	10.4348	0.887939	8.98928	0.000708213	84.753	0.893651	9.24436	0.000382387	91.076	0.870513	8.27557	0.000205439	97.45	0.917033	10.4348	0.000107169	114.31		1	S	SVPNSLSKRNVSLTRSHSVGGPLQNIDFSQR	X;X;X;X;X;X;X;X;X;X;X;X;X;X;X;Phospho (STY);X;X;X;X;X;X;X;X;X;X;X;X;X;X;X	XXXXXXXXXXXXXXXPPPPPPPPPPPPPPPP	0.000107169	114.31	114.31	_S(ph)HSVGGPLQNIDFSQR_	S(0.917)HS(0.083)VGGPLQNIDFSQR	S(10.43)HS(-10.43)VGGPLQNIDFS(-102.7)QR	1	3	607.947	0.097508	0.75547	0.75547	NaN	NaN	0.85617	0.85617	NaN	NaN	NaN
A6H8H2-2;A6H8H2	1686;1637	A6H8H2-2	A6H8H2-2		Dennd4c	>sp|A6H8H2-2|DEN4C_MOUSE Isoform 2 of DENN domain-containing protein 4C OS=Mus musculus GN=Dennd4c;>sp|A6H8H2|DEN4C_MOUSE DENN domain-containing protein 4C OS=Mus musculus GN=Dennd4c PE=1 SV=1	0.999864	38.6688	0.944421	12.3025	0.00165548	76.301	0.999864	38.6688	1.13631e-34	191.78	0.999479	32.8283	5.9085e-16	154.26	0.999172	30.8173	8.55412e-39	198.35		1	S	PNSLSKRNVSLTRSHSVGGPLQNIDFSQRPF	X;X;X;X;X;X;X;X;X;X;X;X;X;X;X;Phospho (STY);X;X;X;X;X;X;X;X;X;X;X;X;X;X;X	XXXXXXXXXXXXXPPPPPPPPPPPPPPPPXX	8.55412e-39	198.35	190.67	_SHS(ph)VGGPLQNIDFSQR_	SHS(1)VGGPLQNIDFSQR	S(-38.67)HS(38.67)VGGPLQNIDFS(-142.73)QR	3	2	911.418	1.2698	0.86969	0.86969	NaN	NaN	0.89225	0.89225	NaN	NaN	NaN
A6H8H2-2;A6H8H2;E9Q449	1370;1321;1370	A6H8H2-2	A6H8H2-2		Dennd4c;Dennd4c	>sp|A6H8H2-2|DEN4C_MOUSE Isoform 2 of DENN domain-containing protein 4C OS=Mus musculus GN=Dennd4c;>sp|A6H8H2|DEN4C_MOUSE DENN domain-containing protein 4C OS=Mus musculus GN=Dennd4c PE=1 SV=1;>tr|E9Q449|E9Q449_MOUSE DENN domain-containing protein 4C OS=Mu	0.999373	32.1417	0.999373	32.1417	0.00285071	103.08	0.99899	30.2584	0.00620046	91.937	0.994505	25.8014	0.00227195	105.46						1	S	FKPQSPYRAYKDRSTSLSALVRSSPNSSLGS	X;X;X;X;X;X;X;X;X;X;X;X;X;X;X;Phospho (STY);X;X;X;X;X;X;X;X;X;X;X;X;X;X;X	XXXXXXXXXXXXXPPPPPPPPPXXXXXXXXX	0.00227195	105.46	103.08	_STS(ph)LSALVR_	STS(0.999)LS(0.001)ALVR	S(-50.69)T(-50.69)S(32.14)LS(-32.14)ALVR	3	2	507.255	1.0132	1.0285	1.0285	NaN	NaN	1.1521	1.1521	NaN	NaN	NaN
A6H8H2-2;A6H8H2;E9Q449	1145;1096;1145	A6H8H2-2	A6H8H2-2		Dennd4c;Dennd4c	>sp|A6H8H2-2|DEN4C_MOUSE Isoform 2 of DENN domain-containing protein 4C OS=Mus musculus GN=Dennd4c;>sp|A6H8H2|DEN4C_MOUSE DENN domain-containing protein 4C OS=Mus musculus GN=Dennd4c PE=1 SV=1;>tr|E9Q449|E9Q449_MOUSE DENN domain-containing protein 4C OS=Mu	0.989896	19.9117	0.969246	14.9913	0.00413202	68.576	0.980016	16.9055	0.000338955	98.062	0.989896	19.9117	0.00527547	66.393	0.982086	17.3895	9.50724e-05	120.63		1	S	LTCPKTSPPHVTRTHSFENVNCHLADSRTRM	X;X;X;X;X;X;X;X;X;X;X;X;X;X;X;Phospho (STY);X;X;X;X;X;X;X;X;X;X;X;X;X;X;X	XXXXXXXXXXXXXPPPPPPPPPPPPPPPXXX	9.50724e-05	120.63	66.393	_THS(ph)FENVNCHLADSR_	T(0.01)HS(0.99)FENVNCHLADSR	T(-19.91)HS(19.91)FENVNCHLADS(-57.98)R	3	3	622.924	0.09923	0.88114	0.88114	NaN	NaN	0.99189	0.99189	NaN	NaN	NaN
A6H8H2-2;A6H8H2;E9Q449;F6WXD7	1036;987;1036;214	A6H8H2-2	A6H8H2-2		Dennd4c;Dennd4c;Dennd4c	>sp|A6H8H2-2|DEN4C_MOUSE Isoform 2 of DENN domain-containing protein 4C OS=Mus musculus GN=Dennd4c;>sp|A6H8H2|DEN4C_MOUSE DENN domain-containing protein 4C OS=Mus musculus GN=Dennd4c PE=1 SV=1;>tr|E9Q449|E9Q449_MOUSE DENN domain-containing protein 4C OS=Mu	1	149.445	1	135.02	6.46963e-29	212.83	1	82.8955	4.19818e-15	197.36	1	76.2089	0.000170314	164.53	1	149.445	3.63857e-29	216.68		1	S	PTEPPAWGSSIVKVPSGLFDTNNRTSTGSTS	X;Phospho (STY);X;X;X;X;X;X;X;X;X;X;X;X;X;Phospho (STY);X;X;X;X;X;X;X;X;X;X;X;X;X;X;X	XXXXXXXXXXXXXPPPPPPPPPPPXXXXXXX	3.63857e-29	216.68	215.34	_VPS(ph)GLFDTNNR_	VPS(1)GLFDTNNR	VPS(149.45)GLFDT(-149.45)NNR	3	2	650.29	-0.28882	0.75109	0.75109	NaN	NaN	0.76073	0.76073	NaN	NaN	NaN
J3QQ59;K7N713;E9Q5P1;E9PUT9;E9PVJ0;E9PW72;E9QAJ8;K7N6W8;E9Q501;E9Q7N2;A6NAS4;A6NAS7;E9PUV8;E9PW80;E9Q257;E9Q7M8;K7N6Y2;K7N707;K7N708;K7N757;Q5FWC9;E9Q3J8;F7B1L1;J3QK73;K7N751;E9Q324;K7N6X2;A6NAS8;A6NAS9;K7N6U6;K7N6U2;K7N6V4;E9Q369;J3KMQ9;K7N6Y4;K7N721;A6NAT8;E9Q9Z8;K7N6T7;K7N6Y8;A6NAT4;E9PZI7;E9PZQ5;Q8C7R2;Q9D073;E9Q7N1;J3QMF6;J3QN62;J3QNM4;K7N6W6;E9Q6N2;E9Q032;E9Q5Q3;A6NAU3;K7N6X4;J3QPB3	159;138;127;138;138;138;138;138;127;131;127;127;127;127;127;127;127;127;127;127;127;127;127;127;127;138;127;127;127;127;127;127;138;127;127;127;72;72;72;127;72;72;72;72;72;72;72;72;72;55;46;55;55;72;72;72	J3QQ59;J3QPB3	J3QPB3		Gm3636;Gm3252;Gm3468;Gm3173;Gm10406;Gm10406;Gm10128;Gm3173;Gm8237;Gm5796;Gm3558;Gm3483;Gm8281;Gm3468;Gm3468;Gm3164;Gm3164;Gm3164;Gm3752;Gm3752;Gm2897;2610042L04Rik;Gm5796;Gm3358;Gm3512;Gm8206;Gm3164	>tr|J3QQ59|J3QQ59_MOUSE Protein Gm3383 OS=Mus musculus GN=LOC100861615 PE=4 SV=1;>tr|K7N713|K7N713_MOUSE Protein Gm3264 OS=Mus musculus GN=Gm3264 PE=4 SV=1;>tr|E9Q5P1|E9Q5P1_MOUSE Protein Gm3636 OS=Mus musculus GN=Gm3636 PE=4 SV=1;>tr|E9PUT9|E9PUT9_MOUSE P	0.706204	5.84538	0.366119	0	0.000897994	90.793					0.706204	5.84538	0.000839177	91.969						1	S	KTMLDMNKMIQSIIGSMQYSKELIEDNYSYS	X;X;X;X;X;X;X;X;X;X;X;X;X;X;X;Phospho (STY);X;X;X;X;X;X;X;X;X;X;X;X;X;X;X	XXXXXXXXPPPPPPPPPPPPPXXXXXXXXXX	0.000839177	91.969	70.41	_MIQSIIGS(ph)MQYSK_	MIQS(0.184)IIGS(0.706)MQY(0.024)S(0.086)K	MIQS(-5.85)IIGS(5.85)MQY(-14.69)S(-9.15)K	8	2	783.359	0.54037	0.56023	0.56023	NaN	NaN	0.55612	0.55612	NaN	NaN	NaN
J3QQ59;K7N713;E9Q5P1;E9PUT9;E9PVJ0;E9PW72;E9QAJ8;K7N6W8;E9Q501;E9Q7N2;A6NAS4;A6NAS7;E9PUV8;E9PW80;E9Q257;E9Q7M8;K7N6Y2;K7N707;K7N708;K7N757;Q5FWC9;E9Q3J8;F7B1L1;J3QK73;K7N751;E9Q324;K7N6X2;A6NAS8;A6NAS9;K7N6U6;K7N6U2;K7N6V4;E9Q369;J3KMQ9;K7N6Y4;K7N721;A6NAT8;E9Q9Z8;K7N6T7;K7N6Y8;A6NAT4;E9PZI7;E9PZQ5;Q8C7R2;Q9D073;E9Q7N1;J3QMF6;J3QN62;J3QNM4;K7N6W6;E9Q6N2;E9Q032;E9Q5Q3;A6NAU3;K7N6X4;J3QPB3	163;142;131;142;142;142;142;142;131;135;131;131;131;131;131;131;131;131;131;131;131;131;131;131;131;142;131;131;131;131;131;131;142;131;131;131;76;76;76;131;76;76;76;76;76;76;76;76;76;59;50;59;59;76;76;76	J3QQ59;J3QPB3	J3QPB3		Gm3636;Gm3252;Gm3468;Gm3173;Gm10406;Gm10406;Gm10128;Gm3173;Gm8237;Gm5796;Gm3558;Gm3483;Gm8281;Gm3468;Gm3468;Gm3164;Gm3164;Gm3164;Gm3752;Gm3752;Gm2897;2610042L04Rik;Gm5796;Gm3358;Gm3512;Gm8206;Gm3164	>tr|J3QQ59|J3QQ59_MOUSE Protein Gm3383 OS=Mus musculus GN=LOC100861615 PE=4 SV=1;>tr|K7N713|K7N713_MOUSE Protein Gm3264 OS=Mus musculus GN=Gm3264 PE=4 SV=1;>tr|E9Q5P1|E9Q5P1_MOUSE Protein Gm3636 OS=Mus musculus GN=Gm3636 PE=4 SV=1;>tr|E9PUT9|E9PUT9_MOUSE P	0.597338	1.74075	0.597338	1.74075	4.9254e-06	127.56					0.457629	0	0.000839177	91.969						1	S	DMNKMIQSIIGSMQYSKELIEDNYSYSIKED	X;X;X;X;X;X;X;X;X;X;X;X;X;X;X;Phospho (STY);X;X;X;X;X;X;X;X;X;X;X;X;X;X;X	XXXXPPPPPPPPPPPPPXXXXXXXXXXXXXX	4.9254e-06	127.56	127.56	_MIQSIIGSMQYS(ph)K_	MIQSIIGS(0.003)MQY(0.4)S(0.597)K	MIQS(-43.74)IIGS(-23.68)MQY(-1.74)S(1.74)K	12	2	783.359	0.44581	1.3244	1.3244	NaN	NaN	1.4876	1.4876	NaN	NaN	NaN
A6P3E4;Q91Y86;D3Z1Z4	377;377;301	A6P3E4	A6P3E4	Mitogen-activated protein kinase 8	Mapk8;Mapk8;Mapk8	>tr|A6P3E4|A6P3E4_MOUSE JNK1 beta1 protein kinase OS=Mus musculus GN=Mapk8 PE=2 SV=1;>sp|Q91Y86|MK08_MOUSE Mitogen-activated protein kinase 8 OS=Mus musculus GN=Mapk8 PE=1 SV=1;>tr|D3Z1Z4|D3Z1Z4_MOUSE Mitogen-activated protein kinase 8 OS=Mus musculus GN=M	1	65.805	1	71.5551	0.0359785	71.555					1	78.5055	0.00239783	108.71	1	65.805	0.055037	65.805		1	S	DLEERTKNGVIRGQPSPLAQVQQ________	X;X;X;X;X;X;X;X;X;X;X;X;X;X;X;Phospho (STY);X;X;X;X;X;X;X;X;X;X;X;X;X;X;X	XXXXXXXXXXXXPPPPPPPPPPPXXXXXXXX	0.00239783	108.71	65.805	_GQPS(ph)PLAQVQQ_	GQPS(1)PLAQVQQ	GQPS(65.81)PLAQVQQ	4	2	616.787	0.55885
Q80U16;A6PW28;Q80U16-2;Q80U16-5;Q80U16-6;Q80U16-7;Q80U16-3;Q80U16-4	62;37;62;65;65;37;62;62	Q80U16	Q80U16	Protein FAM65B	Fam65b	>sp|Q80U16|FA65B_MOUSE Protein FAM65B OS=Mus musculus GN=Fam65b PE=1 SV=2;>tr|A6PW28|A6PW28_MOUSE Likely orthologue of H. sapiens chromosome 6 open reading frame 32 (C6orf32) OS=Mus musculus GN=RP23-461O24.1 PE=4 SV=1;>sp|Q80U16-2|FA65B_MOUSE Isoform 2 of	1	71.7813									1	71.7813	0.000181426	99.927						1	S	FAGFSGLQERRSRCNSFIENASALKKPQAKL	X;X;X;X;X;X;X;X;X;X;X;X;X;X;X;Phospho (STY);X;X;X;X;X;X;X;X;X;X;X;X;X;X;X	XXXXXXXXXXXXXPPPPPPPPPPPPXXXXXX	0.000181426	99.927	99.927	_CNS(ph)FIENASALK_	CNS(1)FIENASALK	CNS(71.78)FIENAS(-71.78)ALK	3	2	717.31	-0.16964	0.168	0.168	NaN	NaN	0.15584	0.15584	NaN	NaN	NaN
Q80U16;A6PW28;Q80U16-2;Q80U16-5;Q80U16-6;Q80U16-7;Q80U16-3;Q80U16-4	44;19;44;47;47;19;44;44	Q80U16	Q80U16	Protein FAM65B	Fam65b	>sp|Q80U16|FA65B_MOUSE Protein FAM65B OS=Mus musculus GN=Fam65b PE=1 SV=2;>tr|A6PW28|A6PW28_MOUSE Likely orthologue of H. sapiens chromosome 6 open reading frame 32 (C6orf32) OS=Mus musculus GN=RP23-461O24.1 PE=4 SV=1;>sp|Q80U16-2|FA65B_MOUSE Isoform 2 of	0.942175	12.1201	0.910131	10.055	0.00169202	81.656	0.499814	0	0.0171571	55.33	0.942175	12.1201	0.000136331	142.39	0.684195	3.35761	0.000387928	105.31		1	S	GSQSFSPGGPNGIIRSQSFAGFSGLQERRSR	X;X;X;X;X;X;X;X;X;X;X;X;X;X;X;Phospho (STY);X;X;X;X;X;X;X;X;X;X;X;X;X;X;X	XXXXXXXXXXXXXXXPPPPPPPPPPPPPXXX	0.000136331	142.39	142.39	_S(ph)QSFAGFSGLQER_	S(0.942)QS(0.058)FAGFSGLQER	S(12.12)QS(-12.12)FAGFS(-97.01)GLQER	1	2	747.325	0.19346	0.73092	0.73092	NaN	NaN	0.84422	0.84422	NaN	NaN	NaN
Q80U16;A6PW28;Q80U16-2;Q80U16-5;Q80U16-6;Q80U16-7;Q80U16-3;Q80U16-4	46;21;46;49;49;21;46;46	Q80U16	Q80U16	Protein FAM65B	Fam65b	>sp|Q80U16|FA65B_MOUSE Protein FAM65B OS=Mus musculus GN=Fam65b PE=1 SV=2;>tr|A6PW28|A6PW28_MOUSE Likely orthologue of H. sapiens chromosome 6 open reading frame 32 (C6orf32) OS=Mus musculus GN=RP23-461O24.1 PE=4 SV=1;>sp|Q80U16-2|FA65B_MOUSE Isoform 2 of	0.999803	37.055	0.997575	26.1445	0.000542275	136.35	0.499814	0	0.0171571	55.33	0.999803	37.055	2.68784e-14	186.98	0.993215	21.7625	0.00140927	84.653		1	S	QSFSPGGPNGIIRSQSFAGFSGLQERRSRCN	X;X;X;X;X;X;X;X;X;X;X;X;X;X;X;Phospho (STY);X;X;X;X;X;X;X;X;X;X;X;X;X;X;X	XXXXXXXXXXXXXPPPPPPPPPPPPPXXXXX	2.68784e-14	186.98	142.94	_SQS(ph)FAGFSGLQER_	SQS(1)FAGFSGLQER	S(-37.05)QS(37.05)FAGFS(-76.99)GLQER	3	2	747.325	0.13245	0.22617	0.22617	NaN	NaN	0.24316	0.24316	NaN	NaN	NaN
A6PW47;Q99K74;Q99K74-2	879;860;829	A6PW47	A6PW47	Mediator of RNA polymerase II transcription subunit 24	Med24;Med24	>tr|A6PW47|A6PW47_MOUSE Mediator complex subunit 24 OS=Mus musculus GN=Med24 PE=4 SV=1;>sp|Q99K74|MED24_MOUSE Mediator of RNA polymerase II transcription subunit 24 OS=Mus musculus GN=Med24 PE=1 SV=1;>sp|Q99K74-2|MED24_MOUSE Isoform 2 of Mediator of RNA po	0.98969	20.9808					0.363297	0.574483	0.0110145	50.776					0.98969	20.9808	0.000192116	88.09		1	S	FPVEDMQPSKLMRLLSSSDDDANILSSPTDR	X;X;X;X;X;X;X;X;X;X;X;X;X;X;X;Phospho (STY);X;X;X;X;X;X;X;X;X;X;X;X;X;X;X	XXXXXXXXXXXXXPPPPPPPPPPPPPPPPPP	0.000192116	88.09	88.09	_LLS(ph)SSDDDANILSSPTDR_	LLS(0.99)S(0.008)S(0.002)DDDANILSSPTDR	LLS(20.98)S(-20.98)S(-26.13)DDDANILS(-68.54)S(-74.26)PT(-73.84)DR	3	2	993.439	-0.8485	1.3776	1.3776	NaN	NaN	1.3145	1.3145	NaN	NaN	NaN
A6PW47;Q99K74;Q99K74-2	890;871;840	A6PW47	A6PW47	Mediator of RNA polymerase II transcription subunit 24	Med24;Med24	>tr|A6PW47|A6PW47_MOUSE Mediator complex subunit 24 OS=Mus musculus GN=Med24 PE=4 SV=1;>sp|Q99K74|MED24_MOUSE Mediator of RNA polymerase II transcription subunit 24 OS=Mus musculus GN=Med24 PE=1 SV=1;>sp|Q99K74-2|MED24_MOUSE Isoform 2 of Mediator of RNA po	0.995363	23.5107									0.995363	23.5107	5.99068e-24	186.35						1	S	MRLLSSSDDDANILSSPTDRSMNSSLSASQL	X;X;X;X;X;X;X;X;X;X;X;X;X;X;X;Phospho (STY);X;X;X;X;X;X;X;X;X;X;X;X;X;X;X	XXPPPPPPPPPPPPPPPPPPXXXXXXXXXXX	5.99068e-24	186.35	186.35	_LLSSSDDDANILSS(ph)PTDR_	LLSSSDDDANILSS(0.995)PT(0.004)DR	LLS(-134.91)S(-124.25)S(-131.72)DDDANILS(-36.93)S(23.51)PT(-23.51)DR	14	2	993.439	2.2826	0.96324	0.96324	NaN	NaN	1.0296	1.0296	NaN	NaN	NaN
E9Q284;Q5SU73;A6PWE1	174;171;227	E9Q284	E9Q284	Coilin	Coil;Coil;Coil	>tr|E9Q284|E9Q284_MOUSE Coilin OS=Mus musculus GN=Coil PE=4 SV=1;>sp|Q5SU73|COIL_MOUSE Coilin OS=Mus musculus GN=Coil PE=2 SV=1;>tr|A6PWE1|A6PWE1_MOUSE Coilin (Fragment) OS=Mus musculus GN=Coil PE=4 SV=1	0.999788	36.7357	0.863026	7.99389	0.000288494	106.82	0.999788	36.7357	1.06503e-13	146.2	0.939968	11.9473	5.54331e-14	151.44	0.969325	14.9969	1.73426e-14	157.91		1	S	ETGRTKSKKKSKVTGSPAEEDEEETKKKSSK	X;X;X;X;X;X;X;X;X;X;X;X;X;X;X;Phospho (STY);X;X;X;X;X;X;X;X;X;X;X;X;X;X;X	XXXXXXXXXXXXPPPPPPPPPPPPPPXXXXX	1.73426e-14	157.91	127.3	_VTGS(ph)PAEEDEEETK_	VTGS(1)PAEEDEEETK	VT(-36.74)GS(36.74)PAEEDEEET(-78.67)K	4	2	800.817	0.14996	0.73195	0.73195	NaN	NaN	0.86708	0.86708	NaN	NaN	NaN
A6X8Z5	563	A6X8Z5	A6X8Z5	Rho GTPase-activating protein 31	Arhgap31	>sp|A6X8Z5|RHG31_MOUSE Rho GTPase-activating protein 31 OS=Mus musculus GN=Arhgap31 PE=1 SV=1	0.997272	26.52	0.997272	26.52	0.000231154	87.326					0.902953	9.69244	0.00720644	58.914						1	S	TKPEPEVPGRAECSQSPPLDPGTQVEKKTLH	X;X;X;X;X;X;X;X;X;X;X;X;X;X;X;Phospho (STY);X;X;X;X;X;X;X;X;X;X;X;X;X;X;X	XXXXXXXXXXPPPPPPPPPPPPPPPPPXXXX	0.000231154	87.326	73.675	_AECSQS(ph)PPLDPGTQVEK_	AECS(0.002)QS(0.997)PPLDPGT(0.001)QVEK	AECS(-26.52)QS(26.52)PPLDPGT(-32.95)QVEK	6	2	961.914	0.24872	0.79996	0.79996	NaN	NaN	0.89123	0.89123	NaN	NaN	NaN
A6X8Z5	1242	A6X8Z5	A6X8Z5	Rho GTPase-activating protein 31	Arhgap31	>sp|A6X8Z5|RHG31_MOUSE Rho GTPase-activating protein 31 OS=Mus musculus GN=Arhgap31 PE=1 SV=1	0.999965	45.764	0.993127	22.0977	0.0519229	78.917					0.999965	45.764	1.08429e-10	143.99						1	S	IPQKSTKDDSPSSLGSPEEEQPKQETGASAS	X;X;X;X;X;X;X;X;X;X;X;X;X;X;X;Phospho (STY);X;X;X;X;X;X;X;X;X;X;X;X;X;X;X	XXXXXXXPPPPPPPPPPPPPPPPXXXXXXXX	1.08429e-10	143.99	143.99	_DDSPSSLGS(ph)PEEEQPK_	DDSPSSLGS(1)PEEEQPK	DDS(-60.1)PS(-51.36)S(-45.76)LGS(45.76)PEEEQPK	9	2	891.359	-1.4816	2.0383	2.0383	NaN	NaN	2.0231	2.0231	NaN	NaN	NaN
A6X8Z5	850	A6X8Z5	A6X8Z5	Rho GTPase-activating protein 31	Arhgap31	>sp|A6X8Z5|RHG31_MOUSE Rho GTPase-activating protein 31 OS=Mus musculus GN=Arhgap31 PE=1 SV=1	0.995984	23.9447	0.993139	21.6065	3.58055e-05	136.5	0.995984	23.9447	0.000493125	119.39	0.977682	16.4155	8.2439e-05	141.08	0.787894	5.69915	0.000536035	118.4		1	S	NARHAVPENKGPGLPSPTKEVDIIPQEEGGA	X;X;X;X;X;X;X;X;X;X;X;X;X;X;X;Phospho (STY);X;X;X;X;X;X;X;X;X;X;X;X;X;X;X	XXXXXXXXXXPPPPPPPPPXXXXXXXXXXXX	3.58055e-05	141.08	107.03	_GPGLPS(ph)PTK_	GPGLPS(0.996)PT(0.004)K	GPGLPS(23.94)PT(-23.94)K	6	2	467.226	0.31654	0.75316	0.75316	NaN	NaN	0.91364	0.91364	NaN	NaN	NaN
A6X8Z5	381	A6X8Z5	A6X8Z5	Rho GTPase-activating protein 31	Arhgap31	>sp|A6X8Z5|RHG31_MOUSE Rho GTPase-activating protein 31 OS=Mus musculus GN=Arhgap31 PE=1 SV=1	0.420616	0									0.420616	0	0.00189056	76.341							S	TTGGFFIPATKMHASSTGSSCDLSKEGEWGQ	X;X;X;X;X;X;X;X;X;X;X;X;X;X;X;Phospho (STY);X;X;X;X;X;X;X;X;X;X;X;X;X;X;X	XXXXXXXXXXXPPPPPPPPPPPPPPXXXXXX	0.00189056	76.341	76.341	_MHASS(ph)TGSSCDLSK_	MHAS(0.133)S(0.421)T(0.421)GS(0.013)S(0.013)CDLSK	MHAS(-4.99)S(0)T(0)GS(-15.21)S(-15.21)CDLS(-39.75)K	5	2	774.297	0.19657
A6X8Z5	384	A6X8Z5	A6X8Z5	Rho GTPase-activating protein 31	Arhgap31	>sp|A6X8Z5|RHG31_MOUSE Rho GTPase-activating protein 31 OS=Mus musculus GN=Arhgap31 PE=1 SV=1	0.879861	8.67262	0.667988	4.83098	9.48157e-15	170.09	0.86476	9.02692	7.13096e-24	194.05	0.820486	7.92498	2.14083e-16	180.78	0.879861	8.67262	1.10462e-38	212.72		1	S	GFFIPATKMHASSTGSSCDLSKEGEWGQEGM	X;X;X;X;X;X;X;X;Oxidation (M);X;X;X;X;X;X;Phospho (STY);X;X;X;X;X;X;X;X;X;X;X;X;X;X;X	XXXXXXXXPPPPPPPPPPPPPPXXXXXXXXX	1.10462e-38	212.72	212.72	_MHASSTGS(ph)SCDLSK_	MHASST(0.001)GS(0.88)S(0.119)CDLSK	MHAS(-77.49)S(-64.21)T(-31.01)GS(8.67)S(-8.67)CDLS(-71.6)K	8	2	774.297	0.78368	0.80371	0.80371	NaN	NaN	0.75059	0.75059	NaN	NaN	NaN
A6X8Z5	385	A6X8Z5	A6X8Z5	Rho GTPase-activating protein 31	Arhgap31	>sp|A6X8Z5|RHG31_MOUSE Rho GTPase-activating protein 31 OS=Mus musculus GN=Arhgap31 PE=1 SV=1	0.659911	2.88235	0.499699	0	9.48157e-15	170.09	0.496532	0	7.13096e-24	194.05	0.659911	2.88235	1.87659e-14	155.2	0.652486	3.16366	6.29645e-16	174.87		1	S	FFIPATKMHASSTGSSCDLSKEGEWGQEGMP	X;X;X;X;X;X;X;X;X;X;X;X;X;X;X;Phospho (STY);X;X;X;X;X;X;X;X;X;X;X;X;X;X;X	XXXXXXXPPPPPPPPPPPPPPXXXXXXXXXX	7.13096e-24	194.05	155.2	_MHASSTGSS(ph)CDLSK_	MHASSTGS(0.34)S(0.66)CDLSK	MHAS(-66.77)S(-54.43)T(-34.3)GS(-2.88)S(2.88)CDLS(-45.16)K	9	2	774.297	0.19503	0.54426	0.54426	NaN	NaN	0.5305	0.5305	NaN	NaN	NaN
A6X8Z5	389	A6X8Z5	A6X8Z5	Rho GTPase-activating protein 31	Arhgap31	>sp|A6X8Z5|RHG31_MOUSE Rho GTPase-activating protein 31 OS=Mus musculus GN=Arhgap31 PE=1 SV=1	0.773228	5.90669					0.773228	5.90669	0.00017038	115.38					0.187909	0.33271	0.04849	45.14		1	S	ATKMHASSTGSSCDLSKEGEWGQEGMPAGAE	X;X;X;X;X;X;X;X;X;X;X;X;X;X;X;Phospho (STY);X;X;X;X;X;X;X;X;X;X;X;X;X;X;X	XXXPPPPPPPPPPPPPPXXXXXXXXXXXXXX	0.00017038	115.38	115.38	_MHASSTGSSCDLS(ph)K_	MHASSTGS(0.028)S(0.198)CDLS(0.773)K	MHAS(-73.84)S(-51.34)T(-39.42)GS(-14.38)S(-5.91)CDLS(5.91)K	13	2	774.297	0.52929	1.3371	1.3371	NaN	NaN	1.5028	1.5028	NaN	NaN	NaN
A6X8Z5	1163	A6X8Z5	A6X8Z5	Rho GTPase-activating protein 31	Arhgap31	>sp|A6X8Z5|RHG31_MOUSE Rho GTPase-activating protein 31 OS=Mus musculus GN=Arhgap31 PE=1 SV=1	1	81.7558	1	81.7558	3.73534e-12	139.86	0.999948	43.6834	0.00149421	96.247	0.999999	59.6253	0.00746294	92.773	1	66.7473	0.000149689	135.02		1	S	QDLDIVAHTLTGRRNSAPVSVSAVRTSFMVK	X;X;X;X;X;X;X;X;X;X;X;X;X;X;X;Phospho (STY);X;X;X;X;X;X;X;X;X;X;X;X;X;X;X	XXXXXXXXXXXXXPPPPPPPPPPPPXXXXXX	3.53326e-12	139.86	131.24	_NS(ph)APVSVSAVR_	NS(1)APVSVSAVR	NS(81.76)APVS(-81.76)VS(-93.56)AVR	2	2	583.782	-0.0077637	0.40982	0.40982	NaN	NaN	0.53295	0.53295	NaN	NaN	NaN
A6X8Z5	343	A6X8Z5	A6X8Z5	Rho GTPase-activating protein 31	Arhgap31	>sp|A6X8Z5|RHG31_MOUSE Rho GTPase-activating protein 31 OS=Mus musculus GN=Arhgap31 PE=1 SV=1	0.999994	52.345	0.999991	50.2451	3.41779e-14	185.27	0.999994	52.345	2.64212e-34	216.54	0.999984	48.0266	2.10952e-09	153.79	0.999958	43.789	4.88644e-58	240.46		1	S	GQRLSVEKATIRPAKSMDSLCSVPVEGKENK	X;X;X;X;X;X;X;X;X;X;X;X;X;X;X;Phospho (STY);Oxidation (M);X;X;X;X;X;X;X;X;X;X;X;X;X;X	XXXXXXXXXXXXXXXPPPPPPPPPPPPPXXX	4.88644e-58	240.46	216.54	_S(ph)MDSLCSVPVEGK_	S(1)MDSLCSVPVEGK	S(52.34)MDS(-52.34)LCS(-109.97)VPVEGK	1	2	744.809	-0.56847	0.91226	0.91226	NaN	NaN	1.0496	1.0496	NaN	NaN	NaN
A6X8Z5	346	A6X8Z5	A6X8Z5	Rho GTPase-activating protein 31	Arhgap31	>sp|A6X8Z5|RHG31_MOUSE Rho GTPase-activating protein 31 OS=Mus musculus GN=Arhgap31 PE=1 SV=1	0.900334	9.6516	0.485558	0	0.0343936	71.279	0.900334	9.6516	0.00185614	81.632										1	S	LSVEKATIRPAKSMDSLCSVPVEGKENKGNF	X;X;X;X;X;X;X;X;X;X;X;X;X;Oxidation (M);X;Phospho (STY);X;X;X;X;X;X;X;X;X;X;X;X;X;X;X	XXXXXXXXXXXXPPPPPPPPPPPPPXXXXXX	0.00185614	81.632	81.632	_SM(ox)DS(ph)LCSVPVEGK_	S(0.098)MDS(0.9)LCS(0.002)VPVEGK	S(-9.65)MDS(9.65)LCS(-26.3)VPVEGK	4	2	752.807	-0.06061	0.87283	0.87283	NaN	NaN	1.0885	1.0885	NaN	NaN	NaN
A6X8Z5	464	A6X8Z5	A6X8Z5	Rho GTPase-activating protein 31	Arhgap31	>sp|A6X8Z5|RHG31_MOUSE Rho GTPase-activating protein 31 OS=Mus musculus GN=Arhgap31 PE=1 SV=1	1	79.9916					1	79.9916	0.000281973	105.99										1	S	PGKSVFTSSLFQMEPSPRHQRKALNISEPFA	X;X;X;X;X;X;X;X;X;X;X;X;X;X;X;Phospho (STY);X;X;X;X;X;X;X;X;X;X;X;X;X;X;X	XXXPPPPPPPPPPPPPPPXXXXXXXXXXXXX	0.000281973	105.99	105.99	_SVFTSSLFQMEPS(ph)PR_	SVFTSSLFQMEPS(1)PR	S(-89.06)VFT(-84.68)S(-79.99)S(-80.8)LFQMEPS(79.99)PR	13	2	896.902	0.44558	1.1288	1.1288	NaN	NaN	1.4158	1.4158	NaN	NaN	NaN
A6X919	22	A6X919	A6X919	Protein dpy-19 homolog 1	Dpy19l1	>sp|A6X919|D19L1_MOUSE Protein dpy-19 homolog 1 OS=Mus musculus GN=Dpy19l1 PE=2 SV=1	0.499476	0	0.499476	0	1.22025e-43	170.27	0.496552	0	4.31471e-06	84.602	0.499064	0	4.99543e-56	181.81	0.496426	0	4.99543e-56	181.81			S	SKHRDAAPRPPRSARSSPPPLSGASEVDAGE	X;X;X;X;X;X;X;X;X;X;X;X;X;X;X;Phospho (STY);X;X;X;X;X;X;X;X;X;X;X;X;X;X;X	XXXXXXXXXXXXXXXPPPPPPPPPPPPPPPP	4.99543e-56	181.81	170.27	_S(ph)SPPPLSGASEVDAGELGSER_	S(0.499)S(0.499)PPPLS(0.001)GASEVDAGELGSER	S(0)S(0)PPPLS(-26.79)GAS(-59.38)EVDAGELGS(-154.31)ER	1	2	1061.47	0.060875
A6X919	23	A6X919	A6X919	Protein dpy-19 homolog 1	Dpy19l1	>sp|A6X919|D19L1_MOUSE Protein dpy-19 homolog 1 OS=Mus musculus GN=Dpy19l1 PE=2 SV=1	0.499476	0	0.499476	0	1.22025e-43	170.27	0.496552	0	4.31471e-06	84.602	0.499064	0	4.99543e-56	181.81	0.496426	0	4.99543e-56	181.81			S	KHRDAAPRPPRSARSSPPPLSGASEVDAGEL	X;X;X;X;X;X;X;X;X;X;X;X;X;X;X;X;X;X;X;X;X;X;X;X;X;X;X;X;X;X;X	XXXXXXXXXXXXXXXXXXXXXXXXXXXXXXX	4.99543e-56	181.81	170.27	_S(ph)SPPPLSGASEVDAGELGSER_	S(0.499)S(0.499)PPPLS(0.001)GASEVDAGELGSER	S(0)S(0)PPPLS(-26.79)GAS(-59.38)EVDAGELGS(-154.31)ER	2	2	1061.47	0.060875
A6ZI47;A6ZI44;P05064;D3YWI1;D3YV98;D3Z510	36;90;36;36;90;36	A6ZI47;A6ZI44	A6ZI44	Fructose-bisphosphate aldolase;Fructose-bisphosphate aldolase;Fructose-bisphosphate aldolase A;Fructose-bisphosphate aldolase	Aldoart2;Aldoa;Aldoa;Aldoa;Aldoa;Aldoa	>tr|A6ZI47|A6ZI47_MOUSE Fructose-bisphosphate aldolase OS=Mus musculus GN=Aldoart2 PE=2 SV=1;>tr|A6ZI44|A6ZI44_MOUSE Fructose-bisphosphate aldolase OS=Mus musculus GN=Aldoa PE=2 SV=1;>sp|P05064|ALDOA_MOUSE Fructose-bisphosphate aldolase A OS=Mus musculus G	0.977732	19.2468	0.842178	9.65042	0.00164221	119.92	0.496629	0	0.000671727	90.453	0.724694	5.71793	0.00032249	103.01	0.977732	19.2468	8.90322e-49	223.76		1	S	HRIVAPGKGILAADESTGSIAKRLQSIGTEN;RRIVAPGKGILAADESTGSIAKRLQSIGTEN	X;X;X;X;X;X;X;X;X;X;X;X;X;X;X;Phospho (STY);X;X;X;X;X;X;X;X;X;Phospho (STY);X;X;X;X;X	XXXXXXXXPPPPPPPPPPPPPPXXXXXXXXX	8.90322e-49	223.76	223.76	_GILAADES(ph)TGSIAK_	GILAADES(0.978)T(0.011)GS(0.012)IAK	GILAADES(19.25)T(-19.63)GS(-19.25)IAK	8	2	706.837	0.89506	1.0384	1.0384	NaN	NaN	1.1793	1.1793	NaN	NaN	0.86709
A6ZI47;A6ZI44;P05064;D3YWI1;D3YV98;D3Z510	39;93;39;39;93;39	A6ZI47;A6ZI44	A6ZI44	Fructose-bisphosphate aldolase;Fructose-bisphosphate aldolase;Fructose-bisphosphate aldolase A;Fructose-bisphosphate aldolase	Aldoart2;Aldoa;Aldoa;Aldoa;Aldoa;Aldoa	>tr|A6ZI47|A6ZI47_MOUSE Fructose-bisphosphate aldolase OS=Mus musculus GN=Aldoart2 PE=2 SV=1;>tr|A6ZI44|A6ZI44_MOUSE Fructose-bisphosphate aldolase OS=Mus musculus GN=Aldoa PE=2 SV=1;>sp|P05064|ALDOA_MOUSE Fructose-bisphosphate aldolase A OS=Mus musculus G	0.999849	40.8549	0.99964	34.5947	1.68432e-14	156.67	0.940479	13.1264	8.5437e-14	148.36	0.999698	38.2072	3.29235e-14	153.75	0.999849	40.8549	3.39228e-19	186.94		1	S	VAPGKGILAADESTGSIAKRLQSIGTENTEE	X;X;X;X;X;X;X;X;X;X;X;X;X;X;X;Phospho (STY);X;X;X;X;X;X;Phospho (STY);X;X;X;X;X;X;X;X	XXXXXPPPPPPPPPPPPPPXXXXXXXXXXXX	6.32229e-47	186.94	113.29	_GILAADESTGS(ph)IAK_	GILAADESTGS(1)IAK	GILAADES(-41.59)T(-40.85)GS(40.85)IAK	11	2	706.837	-0.57252	1.2819	1.2819	NaN	NaN	1.4838	1.4838	NaN	NaN	0.86709
A6ZI47;A6ZI44;P05064;D3YWI1;A6ZI46;Q9CPQ9;D3YV98;D3Z510	46;100;46;46;101;46;100;46	A6ZI47;A6ZI44	A6ZI44	Fructose-bisphosphate aldolase;Fructose-bisphosphate aldolase;Fructose-bisphosphate aldolase A;Fructose-bisphosphate aldolase;Fructose-bisphosphate aldolase;Fructose-bisphosphate aldolase	Aldoart2;Aldoa;Aldoa;Aldoa;Aldoart1;Aldoart1;Aldoa;Aldoa	>tr|A6ZI47|A6ZI47_MOUSE Fructose-bisphosphate aldolase OS=Mus musculus GN=Aldoart2 PE=2 SV=1;>tr|A6ZI44|A6ZI44_MOUSE Fructose-bisphosphate aldolase OS=Mus musculus GN=Aldoa PE=2 SV=1;>sp|P05064|ALDOA_MOUSE Fructose-bisphosphate aldolase A OS=Mus musculus G	1	83.7263	1	83.7263	1.99213e-09	153.23	0.999999	59.2354	0.000386592	105.39					1	73.8949	1.94909e-09	144.29		1	S	LAADESTGSIAKRLQSIGTENTEENRRFYRQ	X;X;X;X;X;Phospho (STY);Phospho (STY);X;Phospho (STY);X;X;X;X;X;X;Phospho (STY);X;X;X;X;X;X;X;X;X;X;X;X;X;X;X	XXXXXXXXXXXXXPPPPPPPPPPPPPXXXXX	1.94909e-09	153.23	142.54	_LQS(ph)IGTENTEENR_	LQS(1)IGTENTEENR	LQS(83.73)IGT(-83.73)ENT(-108.05)EENR	3	2	785.841	0.13623	0.74255	0.74255	NaN	NaN	0.92894	0.92894	NaN	NaN	1.452
A8C756	860	A8C756	A8C756	Thyroid adenoma-associated protein homolog	Thada	>sp|A8C756|THADA_MOUSE Thyroid adenoma-associated protein homolog OS=Mus musculus GN=Thada PE=2 SV=1	0.627162	2.54218	0.415255	0	0.00624071	57.142					0.627162	2.54218	3.83031e-09	132.84	0.567715	1.34549	0.00165216	69.765		1	S	NLLIRQDALPAVLSASSPQQLTRGAGETSAV	X;X;X;X;X;X;X;X;X;X;X;X;X;X;X;Phospho (STY);X;X;X;X;X;X;X;X;X;X;X;X;X;X;X	XXXXXPPPPPPPPPPPPPPPPPPXXXXXXXX	3.83031e-09	132.84	132.84	_QDALPAVLSAS(ph)SPQQLTR_	QDALPAVLS(0.022)AS(0.627)S(0.349)PQQLT(0.002)R	QDALPAVLS(-14.63)AS(2.54)S(-2.54)PQQLT(-25.06)R	11	2	981.488	0.088682	2.2898	2.2898	NaN	NaN	2.248	2.248	NaN	NaN	NaN
A8C756	861	A8C756	A8C756	Thyroid adenoma-associated protein homolog	Thada	>sp|A8C756|THADA_MOUSE Thyroid adenoma-associated protein homolog OS=Mus musculus GN=Thada PE=2 SV=1	0.973566	18.6761	0.523696	0.71836	0.00265917	65.949	0.555815	5.00041	0.0783227	34.274	0.759185	6.46883	8.28103e-07	120.24	0.973566	18.6761	0.000385926	82.707		1	S	LLIRQDALPAVLSASSPQQLTRGAGETSAVL	X;X;X;X;X;X;X;X;X;X;X;X;X;X;X;Phospho (STY);X;X;X;X;X;X;X;X;X;X;X;X;X;X;X	XXXXPPPPPPPPPPPPPPPPPPXXXXXXXXX	8.28103e-07	120.24	78.708	_QDALPAVLSASS(ph)PQQLTR_	QDALPAVLS(0.003)AS(0.01)S(0.974)PQQLT(0.013)R	QDALPAVLS(-25.08)AS(-19.79)S(18.68)PQQLT(-18.68)R	12	2	981.488	-0.23432	2.1302	2.1302	NaN	NaN	2.1625	2.1625	NaN	NaN	NaN
P70271;Q5SWV3;A8Y5C3	111;111;52	P70271	P70271	PDZ and LIM domain protein 4	Pdlim4;Pdlim4;Pdlim4	>sp|P70271|PDLI4_MOUSE PDZ and LIM domain protein 4 OS=Mus musculus GN=Pdlim4 PE=1 SV=3;>tr|Q5SWV3|Q5SWV3_MOUSE PDZ and LIM domain 4 OS=Mus musculus GN=Pdlim4 PE=2 SV=1;>tr|A8Y5C3|A8Y5C3_MOUSE PDZ and LIM domain 4 (Fragment) OS=Mus musculus GN=Pdlim4 PE=4	0.99959	34.911	0.998716	29.0415	3.09791e-11	165.49					0.994217	23.1791	0.000288071	139.02	0.99959	34.911	5.64129e-22	158.58		1	S	AQAHRIHIDPESQDCSPATSRRSSVSGISLE	X;X;X;X;X;X;X;X;X;X;X;X;X;X;X;Phospho (STY);X;X;X;X;X;X;Phospho (STY);Phospho (STY);X;Phospho (STY);X;X;X;X;X	XXXXXPPPPPPPPPPPPPPPPXXXXXXXXXX	5.64129e-22	165.49	121.13	_IHIDPESQDCS(ph)PATSR_	IHIDPESQDCS(1)PATSR	IHIDPES(-66.72)QDCS(34.91)PAT(-34.91)S(-40.62)R	11	3	631.6	-1.2683	4.6485	4.6485	NaN	NaN	4.7585	4.7585	NaN	NaN	NaN
P70271;Q5SWV3;A8Y5C3	118;118;59	P70271	P70271	PDZ and LIM domain protein 4	Pdlim4;Pdlim4;Pdlim4	>sp|P70271|PDLI4_MOUSE PDZ and LIM domain protein 4 OS=Mus musculus GN=Pdlim4 PE=1 SV=3;>tr|Q5SWV3|Q5SWV3_MOUSE PDZ and LIM domain 4 OS=Mus musculus GN=Pdlim4 PE=2 SV=1;>tr|A8Y5C3|A8Y5C3_MOUSE PDZ and LIM domain 4 (Fragment) OS=Mus musculus GN=Pdlim4 PE=4	0.8549	10.7128	0.436232	0	0.00131055	124.21	0.8549	10.7128	0.00107768	130.1										1	S	IDPESQDCSPATSRRSSVSGISLEDNRSGLG	X;X;X;X;Phospho (STY);X;X;X;Phospho (STY);X;X;X;X;X;X;Phospho (STY);X;X;X;X;X;X;X;X;X;X;X;X;X;X;X	XXXXXXXXXXXXXXPPPPPPPPPPPPPXXXX	0.00107768	130.1	130.1	_RS(ph)SVSGISLEDNR_	RS(0.855)S(0.073)VS(0.073)GISLEDNR	RS(10.71)S(-10.71)VS(-10.71)GIS(-65.45)LEDNR	2	3	500.567	0.0053351	0.028533	0.028533	NaN	NaN	0.034436	0.034436	NaN	NaN	NaN
P70271;Q5SWV3;A8Y5C3	119;119;60	P70271	P70271	PDZ and LIM domain protein 4	Pdlim4;Pdlim4;Pdlim4	>sp|P70271|PDLI4_MOUSE PDZ and LIM domain protein 4 OS=Mus musculus GN=Pdlim4 PE=1 SV=3;>tr|Q5SWV3|Q5SWV3_MOUSE PDZ and LIM domain 4 OS=Mus musculus GN=Pdlim4 PE=2 SV=1;>tr|A8Y5C3|A8Y5C3_MOUSE PDZ and LIM domain 4 (Fragment) OS=Mus musculus GN=Pdlim4 PE=4	0.999614	34.2668	0.999614	34.2668	2.73806e-11	163.56	0.999518	36.1777	1.37987e-20	189.59	0.998567	28.4731	0.000172841	142.35	0.878088	8.59083	1.61723e-05	151.39		1	S	DPESQDCSPATSRRSSVSGISLEDNRSGLGS	X;X;X;Phospho (STY);X;X;X;Phospho (STY);X;X;X;X;X;X;X;Phospho (STY);X;X;X;X;X;X;X;X;X;X;X;X;X;X;X	XXXXXXXXXXXXXPPPPPPPPPPPPPXXXXX	1.37987e-20	189.59	153.72	_RSS(ph)VSGISLEDNR_	RSS(1)VSGISLEDNR	RS(-34.27)S(34.27)VS(-49.47)GIS(-76.53)LEDNR	3	2	750.346	-0.74705	0.11087	0.11087	NaN	NaN	0.15127	0.15127	NaN	NaN	NaN
P70271;Q5SWV3;A8Y5C3	121;121;62	P70271	P70271	PDZ and LIM domain protein 4	Pdlim4;Pdlim4;Pdlim4	>sp|P70271|PDLI4_MOUSE PDZ and LIM domain protein 4 OS=Mus musculus GN=Pdlim4 PE=1 SV=3;>tr|Q5SWV3|Q5SWV3_MOUSE PDZ and LIM domain 4 OS=Mus musculus GN=Pdlim4 PE=2 SV=1;>tr|A8Y5C3|A8Y5C3_MOUSE PDZ and LIM domain 4 (Fragment) OS=Mus musculus GN=Pdlim4 PE=4	0.863707	11.0292	0.387412	0	0.00198896	119.39	0.863707	11.0292	0.000274852	141.13										1	S	ESQDCSPATSRRSSVSGISLEDNRSGLGSPY	X;Phospho (STY);X;X;X;Phospho (STY);X;X;X;X;X;X;X;X;X;Phospho (STY);X;X;X;X;X;X;X;X;X;X;X;X;X;X;X	XXXXXXXXXXXPPPPPPPPPPPPPXXXXXXX	0.000274852	141.13	141.13	_RSSVS(ph)GISLEDNR_	RS(0.068)S(0.068)VS(0.864)GISLEDNR	RS(-11.03)S(-11.03)VS(11.03)GIS(-63.94)LEDNR	5	3	500.567	0.21794	0.069809	0.069809	NaN	NaN	0.084252	0.084252	NaN	NaN	NaN
Q9EST3;Q9EST3-2;A8Y5K6	563;539;388	Q9EST3	Q9EST3	Eukaryotic translation initiation factor 4E transporter	Eif4enif1;Eif4enif1	>sp|Q9EST3|4ET_MOUSE Eukaryotic translation initiation factor 4E transporter OS=Mus musculus GN=Eif4enif1 PE=1 SV=2;>sp|Q9EST3-2|4ET_MOUSE Isoform 2 of Eukaryotic translation initiation factor 4E transporter OS=Mus musculus GN=Eif4enif1;>tr|A8Y5K6|A8Y5K6_M	1	78.4725	1	73.6573	9.75445e-05	168.89	1	78.4725	2.33378e-06	175.74	1	88.0249	1.19788e-06	179.67	1	71.4056	0.000191001	162.48		1	S	GSLEATASLLSQRAPSPPMSQVFRTQAASAD	X;X;X;X;X;X;X;X;X;X;X;X;X;X;X;Phospho (STY);X;X;Oxidation (M);X;X;X;X;X;X;X;X;X;X;X;X	XXXXXXXXXXXXXPPPPPPPPPPPXXXXXXX	1.19788e-06	179.67	158.11	_APS(ph)PPMSQVFR_	APS(1)PPMSQVFR	APS(78.47)PPMS(-78.47)QVFR	3	2	648.794	-0.16174	0.89234	0.89234	NaN	NaN	1.1043	1.1043	NaN	NaN	NaN
Q9EST3;Q9EST3-2;A8Y5K6	949;925;774	Q9EST3	Q9EST3	Eukaryotic translation initiation factor 4E transporter	Eif4enif1;Eif4enif1	>sp|Q9EST3|4ET_MOUSE Eukaryotic translation initiation factor 4E transporter OS=Mus musculus GN=Eif4enif1 PE=1 SV=2;>sp|Q9EST3-2|4ET_MOUSE Isoform 2 of Eukaryotic translation initiation factor 4E transporter OS=Mus musculus GN=Eif4enif1;>tr|A8Y5K6|A8Y5K6_M	0.999996	55.4454	0.999973	48.6649	0.00730888	88.819	0.999609	37.0825	0.0113333	80.165	0.995852	23.9665	0.0139285	76.221	0.999996	55.4454	0.000107494	143.5		1	S	HMHSQLEHRTSQRSSSPVGLAKWFGSDVLQQ	X;X;X;X;X;X;X;X;X;X;X;X;X;X;X;Phospho (STY);X;X;X;X;X;X;X;X;X;X;X;X;X;X;X	XXXXXXXXXXXXXPPPPPPPPPXXXXXXXXX	0.000107494	143.5	143.5	_SSS(ph)PVGLAK_	SSS(1)PVGLAK	S(-61.73)S(-55.45)S(55.45)PVGLAK	3	2	463.223	0.16266	0.99656	0.99656	NaN	NaN	1.1671	1.1671	NaN	NaN	NaN
Q9EST3;Q9EST3-2;A8Y5K6;Q5NBZ7	73;73;73;73	Q9EST3	Q9EST3	Eukaryotic translation initiation factor 4E transporter	Eif4enif1;Eif4enif1;Eif4enif1	>sp|Q9EST3|4ET_MOUSE Eukaryotic translation initiation factor 4E transporter OS=Mus musculus GN=Eif4enif1 PE=1 SV=2;>sp|Q9EST3-2|4ET_MOUSE Isoform 2 of Eukaryotic translation initiation factor 4E transporter OS=Mus musculus GN=Eif4enif1;>tr|A8Y5K6|A8Y5K6_M	1	76.3108	0.99991	40.8006	0.000363408	111.83	1	73.3239	0.000201933	152.88	1	76.1845	0.000137694	136.83	1	76.3108	0.000211245	160.48		1	S	GVWDPEKWHASLYPASGRSSPVESLKKESES	X;X;X;X;X;X;X;X;X;X;X;X;X;X;X;Phospho (STY);X;X;X;X;X;X;X;X;X;X;X;X;X;X;X	XXXXXXXPPPPPPPPPPPXXXXXXXXXXXXX	8.70765e-06	160.48	160.48	_WHASLYPAS(ph)GR_	WHASLYPAS(1)GR	WHAS(-76.31)LY(-98.01)PAS(76.31)GR	9	2	662.795	0.20862	0.9767	0.9767	NaN	NaN	1.1621	1.1621	NaN	NaN	NaN
Q8BSN5;B0QZH9	60;50	Q8BSN5	Q8BSN5	PHD finger protein 23	Phf23;Phf23	>sp|Q8BSN5|PHF23_MOUSE PHD finger protein 23 OS=Mus musculus GN=Phf23 PE=2 SV=2;>tr|B0QZH9|B0QZH9_MOUSE PHD finger protein 23 (Fragment) OS=Mus musculus GN=Phf23 PE=4 SV=1	0.683226	7.79051									0.683226	7.79051	0.000688507	90.453	0.29624	1.0134	0.00511584	101.05		1	S	AGYIPPSKEESDWPASGSSSPLRGESAADSD	X;X;X;X;X;X;X;X;X;X;X;X;X;X;X;Phospho (STY);X;X;X;X;X;X;X;X;X;X;X;X;X;X;X	XXXXXXXXPPPPPPPPPPPPPPPXXXXXXXX	0.000688507	101.05	90.453	_EESDWPAS(ph)GSSSPLR_	EES(0.001)DWPAS(0.683)GS(0.114)S(0.089)S(0.114)PLR	EES(-30.21)DWPAS(7.79)GS(-7.79)S(-8.86)S(-7.79)PLR	8	2	842.846	0.40057	1.3479	1.3479	NaN	NaN	1.3638	1.3638	NaN	NaN	NaN
Q8BSN5;B0QZH9	63;53	Q8BSN5	Q8BSN5	PHD finger protein 23	Phf23;Phf23	>sp|Q8BSN5|PHF23_MOUSE PHD finger protein 23 OS=Mus musculus GN=Phf23 PE=2 SV=2;>tr|B0QZH9|B0QZH9_MOUSE PHD finger protein 23 (Fragment) OS=Mus musculus GN=Phf23 PE=4 SV=1	0.450275	0					0.450275	0	0.0016677	78.505											S	IPPSKEESDWPASGSSSPLRGESAADSDGWD	X;X;X;X;X;X;X;X;X;X;X;X;X;X;X;Phospho (STY);X;X;X;X;X;X;X;X;X;X;X;X;X;X;X	XXXXXPPPPPPPPPPPPPPPXXXXXXXXXXX	0.0016677	78.505	78.505	_EESDWPASGSS(ph)SPLR_	EES(0.001)DWPAS(0.022)GS(0.076)S(0.45)S(0.45)PLR	EES(-28.43)DWPAS(-13.03)GS(-7.7)S(0)S(0)PLR	11	2	842.846	1.3234
Q8BSN5;B0QZH9	64;54	Q8BSN5	Q8BSN5	PHD finger protein 23	Phf23;Phf23	>sp|Q8BSN5|PHF23_MOUSE PHD finger protein 23 OS=Mus musculus GN=Phf23 PE=2 SV=2;>tr|B0QZH9|B0QZH9_MOUSE PHD finger protein 23 (Fragment) OS=Mus musculus GN=Phf23 PE=4 SV=1	0.83938	7.62083					0.450275	0	0.0016677	78.505	0.83938	7.62083	0.000301264	100.77	0.41578	0.521997	0.049581	72.207		1	S	PPSKEESDWPASGSSSPLRGESAADSDGWDS	X;X;X;X;X;X;X;X;X;X;X;X;X;X;X;Phospho (STY);X;X;X;X;X;X;X;X;X;X;X;X;X;X;X	XXXXPPPPPPPPPPPPPPPXXXXXXXXXXXX	0.000301264	100.77	100.77	_EESDWPASGSSS(ph)PLR_	EESDWPAS(0.002)GS(0.014)S(0.145)S(0.839)PLR	EES(-81.22)DWPAS(-26.86)GS(-17.87)S(-7.62)S(7.62)PLR	12	2	842.846	0.5928	1.204	1.204	NaN	NaN	1.2792	1.2792	NaN	NaN	NaN
Q5F293;B0QZJ2	556;73	Q5F293	Q5F293		Zbtb4;Zbtb4	>tr|Q5F293|Q5F293_MOUSE Protein Zbtb4 OS=Mus musculus GN=Zbtb4 PE=2 SV=1;>tr|B0QZJ2|B0QZJ2_MOUSE Protein Zbtb4 (Fragment) OS=Mus musculus GN=Zbtb4 PE=4 SV=1	0.842441	7.29572									0.361586	0.12169	0.00203972	113.86	0.842441	7.29572	5.21089e-23	158.92		1	S	RTLTYTAKPVGGLSGSGGSPTGTGRGSSQLQ	X;X;X;X;X;X;X;X;X;X;X;X;X;X;X;Phospho (STY);X;X;X;X;X;X;X;X;X;X;X;X;X;X;X	XXXXXXXXPPPPPPPPPPPPPPPPPXXXXXX	5.21089e-23	158.92	158.92	_PVGGLSGS(ph)GGSPTGTGR_	PVGGLSGS(0.842)GGS(0.157)PTGTGR	PVGGLS(-51.27)GS(7.3)GGS(-7.3)PT(-32.7)GT(-40.47)GR	8	2	762.346	0.53803	0.49908	0.49908	NaN	NaN	0.52213	0.52213	NaN	NaN	NaN
Q5F293;B0QZJ2	559;76	Q5F293	Q5F293		Zbtb4;Zbtb4	>tr|Q5F293|Q5F293_MOUSE Protein Zbtb4 OS=Mus musculus GN=Zbtb4 PE=2 SV=1;>tr|B0QZJ2|B0QZJ2_MOUSE Protein Zbtb4 (Fragment) OS=Mus musculus GN=Zbtb4 PE=4 SV=1	0.969458	16.1106					0.80734	9.48322	0.000668843	134.52	0.969458	16.1106	0.000810417	120.56	0.954386	13.2097	8.97939e-32	171.79		1	S	TYTAKPVGGLSGSGGSPTGTGRGSSQLQAPP	X;X;X;X;X;X;X;X;X;X;X;X;X;X;X;Phospho (STY);X;X;X;X;X;X;X;X;X;X;X;X;X;X;X	XXXXXPPPPPPPPPPPPPPPPPXXXXXXXXX	8.97939e-32	171.79	120.56	_PVGGLSGSGGS(ph)PTGTGR_	PVGGLS(0.003)GS(0.024)GGS(0.969)PT(0.002)GT(0.002)GR	PVGGLS(-25.72)GS(-16.11)GGS(16.11)PT(-26.64)GT(-26.64)GR	11	2	762.346	0.10357	4.5871	4.5871	NaN	NaN	4.8239	4.8239	NaN	NaN	NaN
B0QZN5;P63044;P63024	75;75;62	B0QZN5;P63024	P63024	Vesicle-associated membrane protein 2;Vesicle-associated membrane protein 3	Vamp2;Vamp2;Vamp3	>tr|B0QZN5|B0QZN5_MOUSE Vesicle-associated membrane 2 OS=Mus musculus GN=Vamp2 PE=4 SV=1;>sp|P63044|VAMP2_MOUSE Vesicle-associated membrane protein 2 OS=Mus musculus GN=Vamp2 PE=1 SV=2;>sp|P63024|VAMP3_MOUSE Vesicle-associated membrane protein 3 OS=Mus mus	0.906346	12.2337	0.906346	12.2337	0.00164995	72.09														1	S	LSELDDRADALQAGASQFETSAAKLKRKYWW	X;X;X;X;X;X;X;X;X;X;X;X;X;X;X;Phospho (STY);X;X;X;X;X;X;X;X;X;X;X;X;X;X;X	XXXXXXXPPPPPPPPPPPPPPPPPXXXXXXX	0.00164995	72.09	72.09	_ADALQAGAS(ph)QFETSAAK_	ADALQAGAS(0.906)QFET(0.054)S(0.039)AAK	ADALQAGAS(12.23)QFET(-12.23)S(-13.61)AAK	9	2	873.391	0.26375	2.5687	2.5687	NaN	NaN	3.3207	3.3207	NaN	NaN	0.6464
B0QZN5;P63044;P63024	80;80;67	B0QZN5;P63024	P63024	Vesicle-associated membrane protein 2;Vesicle-associated membrane protein 3	Vamp2;Vamp2;Vamp3	>tr|B0QZN5|B0QZN5_MOUSE Vesicle-associated membrane 2 OS=Mus musculus GN=Vamp2 PE=4 SV=1;>sp|P63044|VAMP2_MOUSE Vesicle-associated membrane protein 2 OS=Mus musculus GN=Vamp2 PE=1 SV=2;>sp|P63024|VAMP3_MOUSE Vesicle-associated membrane protein 3 OS=Mus mus	0.998207	27.5886	0.998207	27.5886	1.99746e-54	202.86	0.757956	5.38186	0.0118603	54.004	0.99363	21.9308	9.31452e-66	225.29	0.975551	16.0201	4.63336e-05	104.06		1	S	DRADALQAGASQFETSAAKLKRKYWWKNCKM;DRADALQAGASQFETSAAKLKRKYWWKNLKM	X;X;X;X;X;X;X;X;X;X;X;X;X;X;X;Phospho (STY);X;X;X;X;X;X;X;X;X;X;X;X;X;X;X	XXPPPPPPPPPPPPPPPPPXXXXXXXXXXXX	9.31452e-66	225.29	201.61	_ADALQAGASQFETS(ph)AAK_	ADALQAGASQFET(0.002)S(0.998)AAK	ADALQAGAS(-42.68)QFET(-27.59)S(27.59)AAK	14	2	873.391	0.070823	2.3528	2.3528	NaN	NaN	2.9464	2.9464	NaN	NaN	0.6464
Q9CQJ7;Q9CQJ7-2;B0QZU1	162;162;73	Q9CQJ7	Q9CQJ7	Securin	Pttg1;Pttg1	>sp|Q9CQJ7|PTTG1_MOUSE Securin OS=Mus musculus GN=Pttg1 PE=1 SV=1;>sp|Q9CQJ7-2|PTTG1_MOUSE Isoform 2 of Securin OS=Mus musculus GN=Pttg1;>tr|B0QZU1|B0QZU1_MOUSE Pituitary tumor-transforming 1 (Fragment) OS=Mus musculus GN=Pttg1 PE=4 SV=1	1	151.216	1	128.675	8.01114e-05	169.89	1	51.7258	0.000122801	138.24	1	118.866	0.000213863	160.22	1	151.216	0.000222453	153.75		1	S	NEERGLEKLLHLGPPSPLKTPFLSWESDPLY	X;X;X;X;X;X;X;X;X;X;X;X;X;X;X;Phospho (STY);X;X;X;X;X;X;X;X;X;X;X;X;X;X;X	XXXXXXXXPPPPPPPPPPPXXXXXXXXXXXX	1.96749e-07	169.89	151.22	_LLHLGPPS(ph)PLK_	LLHLGPPS(1)PLK	LLHLGPPS(151.22)PLK	8	3	417.9	0.0015585	0.85063	0.85063	NaN	NaN	0.96342	0.96342	NaN	NaN	NaN
B0V2M3;B8JJA0	205;205	B0V2M3	B0V2M3		Zfp318;Zfp318	>tr|B0V2M3|B0V2M3_MOUSE Protein Zfp318 OS=Mus musculus GN=Zfp318 PE=4 SV=1;>tr|B8JJA0|B8JJA0_MOUSE Protein Zfp318 OS=Mus musculus GN=Zfp318 PE=4 SV=1	1	64.5651													1	64.5651	0.000350063	107.51		1	S	CVSTPERRRLSDRLGSPVDGLQDMDRDDLTD	X;X;X;X;X;X;X;X;X;X;X;X;X;X;X;Phospho (STY);X;X;X;X;X;X;X;Oxidation (M);X;X;X;X;X;X;X	XXXXXXXXXXXXXPPPPPPPPPPPPPXXXXX	0.000350063	107.51	64.565	_LGS(ph)PVDGLQDM(ox)DR_	LGS(1)PVDGLQDMDR	LGS(64.57)PVDGLQDMDR	3	2	749.816	-0.012417	1.5561	1.5561	NaN	NaN	1.4834	1.4834	NaN	NaN	NaN
B0V2M3;B8JJA0	167;167	B0V2M3	B0V2M3		Zfp318;Zfp318	>tr|B0V2M3|B0V2M3_MOUSE Protein Zfp318 OS=Mus musculus GN=Zfp318 PE=4 SV=1;>tr|B8JJA0|B8JJA0_MOUSE Protein Zfp318 OS=Mus musculus GN=Zfp318 PE=4 SV=1	0.999995	53.551													0.999995	53.551	0.000644988	91.401		1	S	GRGDHPGGGGGSRRRSPGLCSDSSLEESLRI	X;X;X;X;X;X;X;X;X;X;X;X;X;X;X;Phospho (STY);X;X;X;X;X;X;X;X;X;X;X;X;X;X;X	XXXXXXXXXXXXXXXPPPPPPPPPPPPPPPX	0.000644988	91.401	91.401	_S(ph)PGLCSDSSLEESLR_	S(1)PGLCSDSSLEESLR	S(53.55)PGLCS(-53.55)DS(-62.79)S(-67.97)LEES(-75.39)LR	1	2	858.861	0.03706	1.4093	1.4093	NaN	NaN	1.3581	1.3581	NaN	NaN	NaN
Q91VY5;B0V2M9;Q91VY5-2	418;418;418	Q91VY5	Q91VY5	Lysine-specific demethylase 4B	Kdm4b;Kdm4b	>sp|Q91VY5|KDM4B_MOUSE Lysine-specific demethylase 4B OS=Mus musculus GN=Kdm4b PE=1 SV=1;>tr|B0V2M9|B0V2M9_MOUSE Jumonji domain containing 2B OS=Mus musculus GN=Kdm4b PE=4 SV=1;>sp|Q91VY5-2|KDM4B_MOUSE Isoform 2 of Lysine-specific demethylase 4B OS=Mus mus	1	71.0711	0.995657	23.7872	0.0057429	63.447	0.999966	44.7313	0.00152007	77.037	0.999989	49.6001	0.000174331	107.72	1	71.0711	2.60408e-10	141.18		1	S	RRRSQPKKSKPEESRSPGEATAGVSTLDEAR	X;X;X;X;X;X;X;X;X;X;X;X;X;X;X;Phospho (STY);X;X;X;X;X;X;X;X;X;X;X;X;X;X;X	XXXXXXXXXXXXXXXPPPPPPPPPPPPPPPP	2.60408e-10	141.18	141.18	_S(ph)PGEATAGVSTLDEAR_	S(1)PGEATAGVSTLDEAR	S(71.07)PGEAT(-71.07)AGVS(-85.92)T(-96.72)LDEAR	1	2	820.862	-1.0123	0.73211	0.73211	NaN	NaN	0.74608	0.74608	NaN	NaN	NaN
Q3UH70;B0V2V7;Q9ESU6;B0V2V8;Q9ESU6-2;B0V2V6	471;470;470;470;470;470	Q3UH70	Q3UH70	Bromodomain-containing protein 4	Brd4;Brd4;Brd4;Brd4;Brd4	>tr|Q3UH70|Q3UH70_MOUSE Bromodomain-containing protein 4 OS=Mus musculus GN=Brd4 PE=2 SV=1;>tr|B0V2V7|B0V2V7_MOUSE Bromodomain containing 4 OS=Mus musculus GN=Brd4 PE=4 SV=1;>sp|Q9ESU6|BRD4_MOUSE Bromodomain-containing protein 4 OS=Mus musculus GN=Brd4 PE=	0.979105	18.4882					0.979105	18.4882	3.10699e-13	132.84	0.530749	1.86489	4.34858e-07	87.802	0.645762	2.94074	3.37275e-18	139.28		1	S	FAKMPDEPEEPVVTVSSPAVPPPTKVVAPPS	X;X;X;X;X;X;X;X;X;X;X;X;X;X;X;Phospho (STY);X;X;X;X;X;X;X;X;X;X;X;X;X;X;X	XXXPPPPPPPPPPPPPPPPPPPPPPXXXXXX	3.37275e-18	139.28	132.84	_MPDEPEEPVVTVS(ph)SPAVPPPTK_	MPDEPEEPVVT(0.014)VS(0.979)S(0.007)PAVPPPTK	MPDEPEEPVVT(-18.49)VS(18.49)S(-21.44)PAVPPPT(-79.14)K	13	2	1192.06	-0.87039	1.5908	1.5908	NaN	NaN	1.9024	1.9024	NaN	NaN	NaN
Q3UH70;B0V2V7;Q9ESU6;B0V2V8;Q9ESU6-2;B0V2V6	472;471;471;471;471;471	Q3UH70	Q3UH70	Bromodomain-containing protein 4	Brd4;Brd4;Brd4;Brd4;Brd4	>tr|Q3UH70|Q3UH70_MOUSE Bromodomain-containing protein 4 OS=Mus musculus GN=Brd4 PE=2 SV=1;>tr|B0V2V7|B0V2V7_MOUSE Bromodomain containing 4 OS=Mus musculus GN=Brd4 PE=4 SV=1;>sp|Q9ESU6|BRD4_MOUSE Bromodomain-containing protein 4 OS=Mus musculus GN=Brd4 PE=	0.795423	5.99029									0.534406	0.612428	1.72694e-07	98.121	0.795423	5.99029	1.89905e-13	134.28		1	S	AKMPDEPEEPVVTVSSPAVPPPTKVVAPPSS	X;X;X;X;X;X;X;X;X;X;X;X;X;X;X;Phospho (STY);X;X;X;X;X;X;X;X;X;X;X;X;X;X;X	XXPPPPPPPPPPPPPPPPPPPPPPXXXXXXX	1.89905e-13	134.28	134.28	_MPDEPEEPVVTVSS(ph)PAVPPPTK_	MPDEPEEPVVT(0.004)VS(0.2)S(0.795)PAVPPPTK	MPDEPEEPVVT(-22.75)VS(-5.99)S(5.99)PAVPPPT(-38.87)K	14	2	1192.06	-0.072372	0.57776	0.57776	NaN	NaN	0.50946	0.50946	NaN	NaN	NaN
B1APX2;Q3UE31	347;304	B1APX2	B1APX2	Uncharacterized protein KIAA0930 homolog	5031439G07Rik	>tr|B1APX2|B1APX2_MOUSE Novel protein OS=Mus musculus GN=5031439G07Rik PE=4 SV=1;>sp|Q3UE31|K0930_MOUSE Uncharacterized protein KIAA0930 homolog OS=Mus musculus PE=1 SV=2	0.999999	62.4222	0.999996	54.5037	1.74919e-16	199.37	0.999998	57.5693	2.37918e-16	198.16	0.999992	51.1158	4.87406e-23	207.31	0.999999	62.4222	6.89428e-23	205.3		1	S	STPPTPERNNRPAFFSPSLKRKVPRNRIAEM	Phospho (STY);X;X;X;Phospho (STY);X;X;X;X;X;X;X;X;X;X;Phospho (STY);X;X;X;X;X;X;X;X;X;X;X;X;X;X;X	XXXXXXXXPPPPPPPPPPPPXXXXXXXXXXX	4.87406e-23	207.31	200.97	_NNRPAFFS(ph)PSLK_	NNRPAFFS(1)PSLK	NNRPAFFS(62.42)PS(-62.42)LK	8	2	729.35	-0.043357	0.29603	0.29603	NaN	NaN	0.29798	0.29798	NaN	NaN	NaN
B1APX2;Q3UE31	349;306	B1APX2	B1APX2	Uncharacterized protein KIAA0930 homolog	5031439G07Rik	>tr|B1APX2|B1APX2_MOUSE Novel protein OS=Mus musculus GN=5031439G07Rik PE=4 SV=1;>sp|Q3UE31|K0930_MOUSE Uncharacterized protein KIAA0930 homolog OS=Mus musculus PE=1 SV=2	0.997956	26.8872	0.997956	26.8872	3.70573e-06	167.37	0.682032	3.31421	1.51975e-06	171.62	0.989523	19.7517	4.86067e-12	192.39	0.690551	3.48607	5.28115e-06	162.38		1	S	PPTPERNNRPAFFSPSLKRKVPRNRIAEMKK	X;X;Phospho (STY);X;X;X;X;X;X;X;X;X;X;X;X;Phospho (STY);X;X;X;X;X;X;X;X;X;X;X;X;X;X;X	XXXXXXPPPPPPPPPPPPXXXXXXXXXXXXX	4.86067e-12	192.39	159.94	_NNRPAFFSPS(ph)LK_	NNRPAFFS(0.002)PS(0.998)LK	NNRPAFFS(-26.89)PS(26.89)LK	10	3	486.569	-0.57559	2.1681	2.1681	NaN	NaN	2.9452	2.9452	NaN	NaN	NaN
B1APX2;Q3UE31	365;322	B1APX2	B1APX2	Uncharacterized protein KIAA0930 homolog	5031439G07Rik	>tr|B1APX2|B1APX2_MOUSE Novel protein OS=Mus musculus GN=5031439G07Rik PE=4 SV=1;>sp|Q3UE31|K0930_MOUSE Uncharacterized protein KIAA0930 homolog OS=Mus musculus PE=1 SV=2	0.552093	1.05949									0.497742	0	0.00213555	77.597	0.552093	1.05949	0.00254606	75.819		1	S	LKRKVPRNRIAEMKKSHSANDSEEFFREDDS	X;X;X;X;X;X;X;X;X;X;X;X;X;X;X;Phospho (STY);X;X;X;X;X;X;X;X;X;X;X;X;X;X;X	XXXXXXXXXXXXXXXPPPPPPPPPPPPXXXX	0.00213555	77.597	75.819	_S(ph)HSANDSEEFFR_	S(0.552)HS(0.433)ANDS(0.015)EEFFR	S(1.06)HS(-1.06)ANDS(-15.56)EEFFR	1	3	502.528	0.16287	0.31554	0.31554	NaN	NaN	0.31072	0.31072	NaN	NaN	NaN
B1APX2;Q3UE31	367;324	B1APX2	B1APX2	Uncharacterized protein KIAA0930 homolog	5031439G07Rik	>tr|B1APX2|B1APX2_MOUSE Novel protein OS=Mus musculus GN=5031439G07Rik PE=4 SV=1;>sp|Q3UE31|K0930_MOUSE Uncharacterized protein KIAA0930 homolog OS=Mus musculus PE=1 SV=2	0.999981	47.163	0.999939	42.1561	5.01003e-06	130.72	0.999894	39.7622	4.51225e-06	165.49	0.999947	42.7919	2.21265e-06	170.11	0.999981	47.163	3.59338e-06	151.07		1	S	RKVPRNRIAEMKKSHSANDSEEFFREDDSGA	X;X;X;X;X;X;X;X;X;X;X;X;X;X;X;Phospho (STY);X;X;X;X;X;X;X;X;X;X;X;X;X;X;X	XXXXXXXXXXXXXPPPPPPPPPPPPXXXXXX	2.28026e-06	170.11	147.56	_SHS(ph)ANDSEEFFR_	SHS(1)ANDSEEFFR	S(-47.16)HS(47.16)ANDS(-90.15)EEFFR	3	2	753.288	-0.37413	0.73333	0.73333	NaN	NaN	0.77246	0.77246	NaN	NaN	NaN
B1APX2;Q3UE31	405;362	B1APX2	B1APX2	Uncharacterized protein KIAA0930 homolog	5031439G07Rik	>tr|B1APX2|B1APX2_MOUSE Novel protein OS=Mus musculus GN=5031439G07Rik PE=4 SV=1;>sp|Q3UE31|K0930_MOUSE Uncharacterized protein KIAA0930 homolog OS=Mus musculus PE=1 SV=2	1	85.1975	1	81.5802	0.00421016	112.13	1	86.9522	0.00132995	128.03	1	91.712	0.00405279	112.71	1	85.1975	0.00129642	141.88		1	S	LRSRSLSGTGRSLVGSWLKLNRADGNFLLYA	X;X;X;X;X;X;X;X;X;X;X;X;X;X;X;Phospho (STY);X;X;X;X;X;X;X;X;X;X;X;X;X;X;X	XXXXXXXXXXXPPPPPPPPXXXXXXXXXXXX	0.00129642	141.88	97.813	_SLVGS(ph)WLK_	SLVGS(1)WLK	S(-85.2)LVGS(85.2)WLK	5	2	485.244	-0.28047	0.50632	0.50632	NaN	NaN	0.50573	0.50573	NaN	NaN	NaN
B1APX2;Q3UE31	332;289	B1APX2	B1APX2	Uncharacterized protein KIAA0930 homolog	5031439G07Rik	>tr|B1APX2|B1APX2_MOUSE Novel protein OS=Mus musculus GN=5031439G07Rik PE=4 SV=1;>sp|Q3UE31|K0930_MOUSE Uncharacterized protein KIAA0930 homolog OS=Mus musculus PE=1 SV=2	0.964826	14.941													0.964826	14.941	0.0020882	103.04		2	S	DSSPASPMHERVTSFSTPPTPERNNRPAFFS	X;X;X;X;X;X;X;X;X;X;X;X;X;X;X;Phospho (STY);X;X;X;Phospho (STY);X;X;X;X;X;X;X;X;X;X;Phospho (STY)	XXXXXXXXXXXPPPPPPPPPPPPXXXXXXXX	0.0020882	103.04	78.069	_VTSFS(ph)TPPT(ph)PER_	VT(0.001)S(0.004)FS(0.965)T(0.032)PPT(0.998)PER	VT(-31.75)S(-24.24)FS(14.94)T(-14.94)PPT(28.02)PER	5	2	739.802	-0.35559	0.33173	NaN	0.33173	NaN	0.31724	NaN	0.31724	NaN	NaN
B1AQJ2;B0QZF8	716;551	B1AQJ2	B1AQJ2	Ubiquitin carboxyl-terminal hydrolase 36	Usp36;Usp36	>sp|B1AQJ2|UBP36_MOUSE Ubiquitin carboxyl-terminal hydrolase 36 OS=Mus musculus GN=Usp36 PE=2 SV=1;>tr|B0QZF8|B0QZF8_MOUSE Ubiquitin carboxyl-terminal hydrolase 36 (Fragment) OS=Mus musculus GN=Usp36 PE=4 SV=1	0.972489	17.0306									0.972489	17.0306	1.0262e-10	126.68						1	S	NDIGSPSPSAFCDLTSPMKATHPVVASTGPV	X;X;X;X;X;X;X;X;X;X;X;X;X;X;X;Phospho (STY);X;X;X;X;X;X;X;X;X;X;X;X;X;X;X	PPPPPPPPPPPPPPPPPPPXXXXXXXXXXXX	1.0262e-10	126.68	126.68	_ATGNDIGSPSPSAFCDLTS(ph)PMK_	ATGNDIGSPSPS(0.019)AFCDLT(0.008)S(0.972)PMK	AT(-110.06)GNDIGS(-91.06)PS(-50.52)PS(-17.03)AFCDLT(-20.72)S(17.03)PMK	19	2	1166.99	-0.32436	0.73542	0.73542	NaN	NaN	0.7298	0.7298	NaN	NaN	NaN
B1AQJ2;B0QZF8	576;411	B1AQJ2	B1AQJ2	Ubiquitin carboxyl-terminal hydrolase 36	Usp36;Usp36	>sp|B1AQJ2|UBP36_MOUSE Ubiquitin carboxyl-terminal hydrolase 36 OS=Mus musculus GN=Usp36 PE=2 SV=1;>tr|B0QZF8|B0QZF8_MOUSE Ubiquitin carboxyl-terminal hydrolase 36 (Fragment) OS=Mus musculus GN=Usp36 PE=4 SV=1	0.468112	0									0.468112	0	0.000486913	119.53							S	RSQRPGSWASRDTIFSTSPKLLARAITNGHR	X;X;X;X;X;X;X;X;X;X;X;X;X;X;X;Phospho (STY);X;X;X;X;X;X;X;X;X;X;X;X;X;X;X	XXXXXXXXXXXPPPPPPPPPXXXXXXXXXXX	0.000486913	119.53	119.53	_DTIFS(ph)TSPK_	DTIFS(0.468)T(0.468)S(0.064)PK	DT(-92.1)IFS(0)T(0)S(-8.66)PK	5	2	538.239	0.078767
B1AQJ2;B0QZF8	578;413	B1AQJ2	B1AQJ2	Ubiquitin carboxyl-terminal hydrolase 36	Usp36;Usp36	>sp|B1AQJ2|UBP36_MOUSE Ubiquitin carboxyl-terminal hydrolase 36 OS=Mus musculus GN=Usp36 PE=2 SV=1;>tr|B0QZF8|B0QZF8_MOUSE Ubiquitin carboxyl-terminal hydrolase 36 (Fragment) OS=Mus musculus GN=Usp36 PE=4 SV=1	0.999017	32.2277	0.9974	28.038	8.51904e-05	149.94	0.999017	32.2277	4.49461e-05	135.79	0.998196	29.4009	8.78271e-05	149.72	0.998966	30.3493	6.68322e-05	151.44		1	S	QRPGSWASRDTIFSTSPKLLARAITNGHRLK	X;X;X;X;X;X;X;X;X;X;X;X;X;X;X;Phospho (STY);X;X;X;X;X;X;X;X;X;X;X;X;X;X;X	XXXXXXXXXPPPPPPPPPXXXXXXXXXXXXX	4.49461e-05	151.44	135.79	_DTIFSTS(ph)PK_	DTIFS(0.001)TS(0.999)PK	DT(-118.42)IFS(-32.23)T(-34.15)S(32.23)PK	7	2	538.239	0.42567	0.74444	0.74444	NaN	NaN	0.8578	0.8578	NaN	NaN	NaN
B1AQY2;Q69ZH9;F8VQ11;Q69ZH9-2	1458;1453;1247;295	B1AQY2;Q69ZH9-2	B1AQY2	Rho GTPase-activating protein 23	Arhgap23;Arhgap23;Arhgap23	>tr|B1AQY2|B1AQY2_MOUSE Rho GTPase activating protein 23 OS=Mus musculus GN=Arhgap23 PE=4 SV=1;>sp|Q69ZH9|RHG23_MOUSE Rho GTPase-activating protein 23 OS=Mus musculus GN=Arhgap23 PE=1 SV=2;>tr|F8VQ11|F8VQ11_MOUSE Rho GTPase-activating protein 23 OS=Mus mus	0.776703	5.49797	0.479574	0	0.0573311	56.453	0.776703	5.49797	2.93838e-17	138.09					0.490362	0	4.24878e-10	126.86		1	S	KDSGLSSLESTKARASSAASLPSGDLGALQG	X;X;X;X;X;X;X;X;X;X;X;X;X;X;X;Phospho (STY);X;X;X;X;X;X;X;X;X;X;X;X;X;X;X	XXXXXXXXXXXXXXPPPPPPPPPPPPPPPPP	2.93838e-17	138.09	69.747	_AS(ph)SAASLPSGDLGALQGLPQR_	AS(0.777)S(0.219)AAS(0.004)LPSGDLGALQGLPQR	AS(5.5)S(-5.5)AAS(-22.66)LPS(-39.89)GDLGALQGLPQR	2	2	1038.51	0.11304	1.9211	1.9211	NaN	NaN	2.3408	2.3408	NaN	NaN	NaN
B1AQY2;Q69ZH9;F8VQ11;Q69ZH9-2	1459;1454;1248;296	B1AQY2;Q69ZH9-2	B1AQY2	Rho GTPase-activating protein 23	Arhgap23;Arhgap23;Arhgap23	>tr|B1AQY2|B1AQY2_MOUSE Rho GTPase activating protein 23 OS=Mus musculus GN=Arhgap23 PE=4 SV=1;>sp|Q69ZH9|RHG23_MOUSE Rho GTPase-activating protein 23 OS=Mus musculus GN=Arhgap23 PE=1 SV=2;>tr|F8VQ11|F8VQ11_MOUSE Rho GTPase-activating protein 23 OS=Mus mus	0.543086	1.97133	0.479574	0	0.0573311	56.453	0.49944	0	2.93838e-17	138.09					0.543086	1.97133	4.24878e-10	126.86		1	S	DSGLSSLESTKARASSAASLPSGDLGALQGL	X;X;X;X;X;X;X;X;X;X;X;X;X;X;X;Phospho (STY);X;X;X;X;X;X;X;X;X;X;X;X;X;X;X	XXXXXXXXXXXXXPPPPPPPPPPPPPPPPPP	2.93838e-17	138.09	73.649	_ASS(ph)AASLPSGDLGALQGLPQR_	AS(0.345)S(0.543)AAS(0.061)LPS(0.051)GDLGALQGLPQR	AS(-1.97)S(1.97)AAS(-9.5)LPS(-10.27)GDLGALQGLPQR	3	2	1038.51	-0.085056	0.5469	0.5469	NaN	NaN	0.52975	0.52975	NaN	NaN	NaN
B1AQY2;Q69ZH9;F8VQ11;Q69ZH9-2	1462;1457;1251;299	B1AQY2;Q69ZH9-2	B1AQY2	Rho GTPase-activating protein 23	Arhgap23;Arhgap23;Arhgap23	>tr|B1AQY2|B1AQY2_MOUSE Rho GTPase activating protein 23 OS=Mus musculus GN=Arhgap23 PE=4 SV=1;>sp|Q69ZH9|RHG23_MOUSE Rho GTPase-activating protein 23 OS=Mus musculus GN=Arhgap23 PE=1 SV=2;>tr|F8VQ11|F8VQ11_MOUSE Rho GTPase-activating protein 23 OS=Mus mus	0.339756	0.127528					0.339756	0.127528	1.05053e-08	121.5											S	LSSLESTKARASSAASLPSGDLGALQGLPQR	X;X;X;X;X;X;X;X;X;X;X;X;X;X;X;Phospho (STY);X;X;X;X;X;X;X;X;X;X;X;X;X;X;X	XXXXXXXXXXPPPPPPPPPPPPPPPPPPPPP	1.05053e-08	121.5	121.5	_ASSAAS(ph)LPSGDLGALQGLPQR_	AS(0.33)S(0.33)AAS(0.34)LPSGDLGALQGLPQR	AS(-0.13)S(-0.13)AAS(0.13)LPS(-29.36)GDLGALQGLPQR	6	2	1038.51	-0.16812
B1AQY2;Q69ZH9;F8VQ11;D6RDB5	678;673;467;167	B1AQY2	B1AQY2	Rho GTPase-activating protein 23	Arhgap23;Arhgap23;Arhgap23;Arhgap23	>tr|B1AQY2|B1AQY2_MOUSE Rho GTPase activating protein 23 OS=Mus musculus GN=Arhgap23 PE=4 SV=1;>sp|Q69ZH9|RHG23_MOUSE Rho GTPase-activating protein 23 OS=Mus musculus GN=Arhgap23 PE=1 SV=2;>tr|F8VQ11|F8VQ11_MOUSE Rho GTPase-activating protein 23 OS=Mus mus	0.614772	5.05486					0.467215	1.47252	0.000293382	102.9	0.614772	5.05486	0.000274546	107.99	0.389421	0	0.000128352	103.76		1	S	SWGTSEDADAPSKRHSTSDLSDATFSDIRRE	X;X;X;X;X;X;X;X;X;X;X;X;X;X;X;Phospho (STY);X;X;X;X;X;X;X;X;X;X;X;X;X;X;X	XXXXXXXXXXXXXPPPPPPPPPPPPPPPPXX	0.000128352	107.99	78.441	_RHS(ph)TSDLSDATFSDIR_	RHS(0.615)T(0.192)S(0.192)DLS(0.001)DATFSDIR	RHS(5.05)T(-5.05)S(-5.05)DLS(-26.8)DAT(-49.35)FS(-60.38)DIR	3	3	629.946	-0.20852	0.42873	0.42873	NaN	NaN	0.45509	0.45509	NaN	NaN	NaN
B1AQY2;Q69ZH9;F8VQ11;D6RDB5	680;675;469;169	B1AQY2	B1AQY2	Rho GTPase-activating protein 23	Arhgap23;Arhgap23;Arhgap23;Arhgap23	>tr|B1AQY2|B1AQY2_MOUSE Rho GTPase activating protein 23 OS=Mus musculus GN=Arhgap23 PE=4 SV=1;>sp|Q69ZH9|RHG23_MOUSE Rho GTPase-activating protein 23 OS=Mus musculus GN=Arhgap23 PE=1 SV=2;>tr|F8VQ11|F8VQ11_MOUSE Rho GTPase-activating protein 23 OS=Mus mus	0.333022	0					0.298996	0	0.0497683	39.517	0.332069	0	0.0386031	41.378	0.333022	0	0.000353758	88.561			S	GTSEDADAPSKRHSTSDLSDATFSDIRREGW	X;X;X;X;X;X;X;X;X;X;X;X;X;X;X;X;X;X;X;X;X;X;X;X;X;X;X;X;X;X;X	XXXXXXXXXXXXXXXXXXXXXXXXXXXXXXX	0.000353758	88.561	88.561	_RHS(ph)TSDLSDATFSDIR_	RHS(0.333)T(0.333)S(0.333)DLS(0.001)DATFSDIR	RHS(0)T(0)S(0)DLS(-25.52)DAT(-57.6)FS(-71.34)DIR	5	3	629.946	-0.23173
B1AQY2;Q69ZH9;F8VQ11;D6RDB5	683;678;472;172	B1AQY2	B1AQY2	Rho GTPase-activating protein 23	Arhgap23;Arhgap23;Arhgap23;Arhgap23	>tr|B1AQY2|B1AQY2_MOUSE Rho GTPase activating protein 23 OS=Mus musculus GN=Arhgap23 PE=4 SV=1;>sp|Q69ZH9|RHG23_MOUSE Rho GTPase-activating protein 23 OS=Mus musculus GN=Arhgap23 PE=1 SV=2;>tr|F8VQ11|F8VQ11_MOUSE Rho GTPase-activating protein 23 OS=Mus mus	0.448522	0									0.448522	0	0.000274546	107.99							S	EDADAPSKRHSTSDLSDATFSDIRREGWLYY	X;X;X;X;X;X;X;X;X;X;X;X;X;X;X;X;X;X;X;X;X;X;X;X;X;X;X;X;X;X;X	XXXXXXXXXXXXXXXXXXXXXXXXXXXXXXX	0.000274546	107.99	107.99	_HS(ph)TSDLSDATFSDIR_	HS(0.449)T(0.051)S(0.051)DLS(0.449)DATFSDIR	HS(0)T(-9.4)S(-9.4)DLS(0)DAT(-52.45)FS(-75.25)DIR	7	3	577.912	0.47092
B1AQY2;Q69ZH9;F8VQ11;D6RDB5	599;594;388;88	B1AQY2	B1AQY2	Rho GTPase-activating protein 23	Arhgap23;Arhgap23;Arhgap23;Arhgap23	>tr|B1AQY2|B1AQY2_MOUSE Rho GTPase activating protein 23 OS=Mus musculus GN=Arhgap23 PE=4 SV=1;>sp|Q69ZH9|RHG23_MOUSE Rho GTPase-activating protein 23 OS=Mus musculus GN=Arhgap23 PE=1 SV=2;>tr|F8VQ11|F8VQ11_MOUSE Rho GTPase-activating protein 23 OS=Mus mus	0.999843	39.4265	0.998946	31.2591	0.0181402	61.212	0.997307	29.0909	0.00575314	78.324	0.999843	39.4265	0.0016734	94.688	0.999523	36.2285	0.00575314	78.324		1	S	SPSSPTFTFALSRHYSQDCSSIKAGRRSSYL	X;X;X;X;X;X;X;X;X;X;X;X;X;X;X;Phospho (STY);X;X;X;X;X;X;X;X;X;X;X;X;Phospho (STY);X;X	XXXXXXXXXXXXXPPPPPPPPPPXXXXXXXX	0.0016734	94.688	94.688	_HYS(ph)QDCSSIK_	HYS(1)QDCSSIK	HY(-47.39)S(39.43)QDCS(-39.43)S(-46.12)IK	3	2	652.752	-0.064087	1.9896	1.9896	NaN	NaN	2.3924	2.3924	NaN	NaN	NaN
B1AQY2;Q69ZH9;F8VQ11;Q69ZH9-2	1300;1295;1089;137	B1AQY2;Q69ZH9-2	B1AQY2	Rho GTPase-activating protein 23	Arhgap23;Arhgap23;Arhgap23	>tr|B1AQY2|B1AQY2_MOUSE Rho GTPase activating protein 23 OS=Mus musculus GN=Arhgap23 PE=4 SV=1;>sp|Q69ZH9|RHG23_MOUSE Rho GTPase-activating protein 23 OS=Mus musculus GN=Arhgap23 PE=1 SV=2;>tr|F8VQ11|F8VQ11_MOUSE Rho GTPase-activating protein 23 OS=Mus mus	0.825223	8.76543					0.573143	1.87683	0.000235067	85.51	0.368047	0	0.011391	51.771	0.825223	8.76543	3.71396e-05	98.676		1	S	TEGGAGPGGRLSRRPSFSSHHLMPCDTLARR	X;X;X;X;X;X;X;X;X;X;X;X;X;X;X;Phospho (STY);X;X;X;X;X;X;Oxidation (M);X;X;X;X;X;X;X;X	XXXXXXXXXXXXXPPPPPPPPPPPPPPPPPX	3.71396e-05	98.676	98.676	_RPS(ph)FSSHHLMPCDTLAR_	RPS(0.825)FS(0.11)S(0.065)HHLMPCDTLAR	RPS(8.77)FS(-8.77)S(-11.03)HHLMPCDT(-50.27)LAR	3	4	523.737	-0.25103	0.63717	0.63717	NaN	NaN	0.6297	0.6297	NaN	NaN	NaN
B1AQY2;Q69ZH9;F8VQ11;Q69ZH9-2	1302;1297;1091;139	B1AQY2;Q69ZH9-2	B1AQY2	Rho GTPase-activating protein 23	Arhgap23;Arhgap23;Arhgap23	>tr|B1AQY2|B1AQY2_MOUSE Rho GTPase activating protein 23 OS=Mus musculus GN=Arhgap23 PE=4 SV=1;>sp|Q69ZH9|RHG23_MOUSE Rho GTPase-activating protein 23 OS=Mus musculus GN=Arhgap23 PE=1 SV=2;>tr|F8VQ11|F8VQ11_MOUSE Rho GTPase-activating protein 23 OS=Mus mus	0.586693	2.42916					0.586693	2.42916	3.71396e-05	98.676	0.368047	0	0.011391	51.771	0.475314	0	9.43003e-05	90.707		1	S	GGAGPGGRLSRRPSFSSHHLMPCDTLARRRL	X;X;X;X;X;X;X;X;X;X;X;X;X;X;X;Phospho (STY);X;X;X;X;X;X;X;X;X;X;X;X;X;X;X	XXXXXXXXXXXPPPPPPPPPPPPPPPPPXXX	3.71396e-05	98.676	98.676	_RPSFS(ph)SHHLMPCDTLAR_	RPS(0.078)FS(0.587)S(0.335)HHLMPCDTLAR	RPS(-8.77)FS(2.43)S(-2.43)HHLMPCDT(-65.86)LAR	5	4	523.737	0.20425	1.2265	1.2265	NaN	NaN	1.6019	1.6019	NaN	NaN	NaN
B1AQY2;Q69ZH9;F8VQ11	377;372;166	B1AQY2	B1AQY2	Rho GTPase-activating protein 23	Arhgap23;Arhgap23;Arhgap23	>tr|B1AQY2|B1AQY2_MOUSE Rho GTPase activating protein 23 OS=Mus musculus GN=Arhgap23 PE=4 SV=1;>sp|Q69ZH9|RHG23_MOUSE Rho GTPase-activating protein 23 OS=Mus musculus GN=Arhgap23 PE=1 SV=2;>tr|F8VQ11|F8VQ11_MOUSE Rho GTPase-activating protein 23 OS=Mus mus	1	77.1289									1	77.1289	0.000158621	140.81						1	S	RATRSAEALGPGALVSPRLERCGWASQRPSA	X;X;X;X;X;X;X;X;X;X;X;X;X;X;X;Phospho (STY);X;X;X;X;X;X;X;X;X;X;X;X;X;X;X	XXXXPPPPPPPPPPPPPPXXXXXXXXXXXXX	0.000158621	140.81	140.81	_SAEALGPGALVS(ph)PR_	SAEALGPGALVS(1)PR	S(-77.13)AEALGPGALVS(77.13)PR	12	2	702.848	0.26947	0.51333	0.51333	NaN	NaN	0.498	0.498	NaN	NaN	NaN
B1AQY2;Q69ZH9;F8VQ11;D6RDB5	622;617;411;111	B1AQY2	B1AQY2	Rho GTPase-activating protein 23	Arhgap23;Arhgap23;Arhgap23;Arhgap23	>tr|B1AQY2|B1AQY2_MOUSE Rho GTPase activating protein 23 OS=Mus musculus GN=Arhgap23 PE=4 SV=1;>sp|Q69ZH9|RHG23_MOUSE Rho GTPase-activating protein 23 OS=Mus musculus GN=Arhgap23 PE=1 SV=2;>tr|F8VQ11|F8VQ11_MOUSE Rho GTPase-activating protein 23 OS=Mus mus	0.919183	10.5591	0.919183	10.5591	0.000286223	96.673	0.639343	2.48683	0.000168068	101.39					0.551287	0.894813	0.00853844	62.338		1	S	AGRRSSYLLAITTERSKSCDDGLNTFRDEGR	X;X;X;X;X;Phospho (STY);X;X;X;X;X;X;X;X;X;Phospho (STY);X;X;X;X;X;X;X;X;X;X;X;X;X;X;X	XXXXXXXXXXXXXXXPPPPPPPPPPPPXXXX	0.000168068	101.39	79.82	_S(ph)KSCDDGLNTFR_	S(0.919)KS(0.081)CDDGLNTFR	S(10.56)KS(-10.56)CDDGLNT(-57.49)FR	1	2	740.3	0.066384	1.6145	1.6145	NaN	NaN	2.2821	2.2821	NaN	NaN	NaN
B1AQY2;Q69ZH9;F8VQ11;D6RDB5	624;619;413;113	B1AQY2	B1AQY2	Rho GTPase-activating protein 23	Arhgap23;Arhgap23;Arhgap23;Arhgap23	>tr|B1AQY2|B1AQY2_MOUSE Rho GTPase activating protein 23 OS=Mus musculus GN=Arhgap23 PE=4 SV=1;>sp|Q69ZH9|RHG23_MOUSE Rho GTPase-activating protein 23 OS=Mus musculus GN=Arhgap23 PE=1 SV=2;>tr|F8VQ11|F8VQ11_MOUSE Rho GTPase-activating protein 23 OS=Mus mus	0.999084	30.8828	0.999084	30.8828	1.63103e-05	118.19	0.874092	8.44616	0.000572283	89.506	0.946006	12.4355	0.000237075	97.904	0.994751	23.452	0.00114785	84.41		1	S	RRSSYLLAITTERSKSCDDGLNTFRDEGRVL	X;X;X;Phospho (STY);X;X;X;X;X;X;X;X;X;X;X;Phospho (STY);X;X;X;X;X;X;X;X;X;X;X;X;X;X;X	XXXXXXXXXXXXXPPPPPPPPPPPPXXXXXX	1.63103e-05	118.19	67.102	_SKS(ph)CDDGLNTFR_	S(0.001)KS(0.999)CDDGLNTFR	S(-30.88)KS(30.88)CDDGLNT(-39.97)FR	3	2	740.3	0.37574	1.6854	1.6854	NaN	NaN	2.2328	2.2328	NaN	NaN	NaN
B1AQZ2;P28741;Q3UI47;Q3TET1;B1AQZ5	713;689;686;682;173	B1AQZ2	B1AQZ2	Kinesin-like protein KIF3A	Kif3a;Kif3a;Kif3a;Kif3a;Kif3a	>tr|B1AQZ2|B1AQZ2_MOUSE Kinesin family member 3A OS=Mus musculus GN=Kif3a PE=3 SV=1;>sp|P28741|KIF3A_MOUSE Kinesin-like protein KIF3A OS=Mus musculus GN=Kif3a PE=1 SV=2;>tr|Q3UI47|Q3UI47_MOUSE Kinesin family member 3A OS=Mus musculus GN=Kif3a PE=2 SV=1;>tr	0.999998	57.5269	0.999974	45.8483	3.62502e-12	183.31	0.999998	57.5269	3.43839e-17	179.74	0.999966	44.7045	7.70148e-26	205.95	0.999952	43.1668	2.13979e-14	188.44		1	S	TSKGKARPKMGRRKRSAKPETVIDSLLQ___	X;X;X;X;X;X;X;X;X;X;X;X;X;X;X;Phospho (STY);X;X;X;X;X;X;X;X;X;X;X;X;X;X;X	XXXXXXXXXXXXXXXPPPPPPPPPPPPPXXX	7.70148e-26	205.95	149.97	_S(ph)AKPETVIDSLLQ_	S(1)AKPETVIDSLLQ	S(57.53)AKPET(-57.53)VIDS(-110.44)LLQ	1	2	740.868	-0.61772	0.11931	0.11931	NaN	NaN	0.14793	0.14793	NaN	NaN	NaN
B1AR10;B1AR09	400;370	B1AR10	B1AR10		Mllt6;Mllt6	>tr|B1AR10|B1AR10_MOUSE Myeloid/lymphoid or mixed lineage-leukemia translocation to 6 homolog (Drosophila) OS=Mus musculus GN=Mllt6 PE=4 SV=1;>tr|B1AR09|B1AR09_MOUSE Myeloid/lymphoid or mixed lineage-leukemia translocation to 6 homolog (Drosophila) OS=Mus	0.860129	7.88836													0.860129	7.88836	7.54859e-37	172.83		1	S	DKYPKPADPTPPAPPSPTAPEPPKADLFEQK	X;X;X;X;X;X;X;X;X;X;X;X;X;X;X;Phospho (STY);X;X;X;X;X;X;X;X;X;X;X;X;X;X;X	XXXXXPPPPPPPPPPPPPPPPPPPXXXXXXX	7.54859e-37	172.83	172.83	_PADPTPPAPPS(ph)PTAPEPPK_	PADPTPPAPPS(0.86)PT(0.14)APEPPK	PADPT(-108.45)PPAPPS(7.89)PT(-7.89)APEPPK	11	2	972.461	0.031206	0.8981	0.8981	NaN	NaN	0.81834	0.81834	NaN	NaN	NaN
B1AR17;E9Q614;F7C528	764;764;671	B1AR17	B1AR17		Chd3;Chd3;Chd3	>tr|B1AR17|B1AR17_MOUSE Chromodomain helicase DNA binding protein 3 OS=Mus musculus GN=Chd3 PE=4 SV=1;>tr|E9Q614|E9Q614_MOUSE Protein Chd3 OS=Mus musculus GN=Chd3 PE=4 SV=1;>tr|F7C528|F7C528_MOUSE Protein Chd3 (Fragment) OS=Mus musculus GN=Chd3 PE=4 SV=1	0.881797	9.66778	0.881797	9.66778	6.46016e-09	130.29	0.809461	7.94954	2.95871e-07	124.69	0.371492	0	0.000280475	85.636	0.560739	1.76154	0.000136323	90.754		1	S	KYKKKKKELQGDGPPSSPTNDPTVKYETQPR	X;X;X;X;X;X;X;X;X;X;X;X;X;X;X;Phospho (STY);X;X;X;X;X;X;X;X;X;X;X;X;X;X;X	XXXXXXXPPPPPPPPPPPPPPPPPPXXXXXX	6.46016e-09	130.29	130.29	_ELQGDGPPS(ph)SPTNDPTVK_	ELQGDGPPS(0.882)S(0.095)PT(0.023)NDPTVK	ELQGDGPPS(9.67)S(-9.67)PT(-15.83)NDPT(-55.6)VK	9	2	959.925	-0.071206	0.71071	0.71071	NaN	NaN	0.87324	0.87324	NaN	NaN	NaN
B1AR17;E9Q614;F7C528	765;765;672	B1AR17	B1AR17		Chd3;Chd3;Chd3	>tr|B1AR17|B1AR17_MOUSE Chromodomain helicase DNA binding protein 3 OS=Mus musculus GN=Chd3 PE=4 SV=1;>tr|E9Q614|E9Q614_MOUSE Protein Chd3 OS=Mus musculus GN=Chd3 PE=4 SV=1;>tr|F7C528|F7C528_MOUSE Protein Chd3 (Fragment) OS=Mus musculus GN=Chd3 PE=4 SV=1	0.974645	17.0892	0.94082	15.0236	8.18403e-66	205.68	0.918129	12.2189	4.45352e-95	238.79	0.951941	14.475	1.16988e-59	195.38	0.974645	17.0892	4.68588e-83	222.06		1	S	YKKKKKELQGDGPPSSPTNDPTVKYETQPRF	X;X;X;X;X;X;X;X;X;X;X;X;X;X;X;Phospho (STY);X;X;X;X;X;X;X;X;X;X;X;X;X;X;X	XXXXXXPPPPPPPPPPPPPPPPPPXXXXXXX	4.45352e-95	238.79	149.73	_ELQGDGPPSS(ph)PTNDPTVK_	ELQGDGPPS(0.019)S(0.975)PT(0.006)NDPTVK	ELQGDGPPS(-17.09)S(17.09)PT(-21.9)NDPT(-50.39)VK	10	2	959.925	0.41183	0.99588	0.99588	NaN	NaN	0.96903	0.96903	NaN	NaN	NaN
B1AR17;E9Q614;F7C528	1651;1651;1558	B1AR17	B1AR17		Chd3;Chd3;Chd3	>tr|B1AR17|B1AR17_MOUSE Chromodomain helicase DNA binding protein 3 OS=Mus musculus GN=Chd3 PE=4 SV=1;>tr|E9Q614|E9Q614_MOUSE Protein Chd3 OS=Mus musculus GN=Chd3 PE=4 SV=1;>tr|F7C528|F7C528_MOUSE Protein Chd3 (Fragment) OS=Mus musculus GN=Chd3 PE=4 SV=1	0.985519	18.3294					0.764783	5.30747	0.00410391	108.71					0.985519	18.3294	9.46299e-05	148.38		1	S	EKNSKVGEKMEAEVDSPSPAPSLGERLEHRK	X;X;X;X;X;X;X;X;X;X;X;X;X;X;X;Phospho (STY);X;X;X;X;X;X;X;X;X;X;X;X;X;X;X	XXXXXXXXXPPPPPPPPPPPPPPPPPXXXXX	9.46299e-05	148.38	148.38	_MEAEVDS(ph)PSPAPSLGER_	MEAEVDS(0.986)PS(0.014)PAPSLGER	MEAEVDS(18.33)PS(-18.33)PAPS(-55.45)LGER	7	2	926.395	0.5423	2.4859	2.4859	NaN	NaN	2.6618	2.6618	NaN	NaN	NaN
B1AR17;E9Q614;F7C528	1653;1653;1560	B1AR17	B1AR17		Chd3;Chd3;Chd3	>tr|B1AR17|B1AR17_MOUSE Chromodomain helicase DNA binding protein 3 OS=Mus musculus GN=Chd3 PE=4 SV=1;>tr|E9Q614|E9Q614_MOUSE Protein Chd3 OS=Mus musculus GN=Chd3 PE=4 SV=1;>tr|F7C528|F7C528_MOUSE Protein Chd3 (Fragment) OS=Mus musculus GN=Chd3 PE=4 SV=1	0.999342	31.8123													0.999342	31.8123	0.0018134	142.41		2	S	NSKVGEKMEAEVDSPSPAPSLGERLEHRKIL	X;X;X;X;X;X;X;X;X;X;X;X;X;X;X;Phospho (STY);X;X;X;Phospho (STY);X;X;X;X;X;X;X;X;X;X;X	XXXXXXXPPPPPPPPPPPPPPPPPXXXXXXX	0.0018134	142.41	142.41	_MEAEVDSPS(ph)PAPS(ph)LGER_	MEAEVDS(0.001)PS(0.999)PAPS(1)LGER	MEAEVDS(-31.81)PS(31.81)PAPS(84.72)LGER	9	2	966.378	-0.69378	1.3193	NaN	1.3193	NaN	1.2536	NaN	1.2536	NaN	NaN
B1AR17;E9Q614;F7C528	1657;1657;1564	B1AR17	B1AR17		Chd3;Chd3;Chd3	>tr|B1AR17|B1AR17_MOUSE Chromodomain helicase DNA binding protein 3 OS=Mus musculus GN=Chd3 PE=4 SV=1;>tr|E9Q614|E9Q614_MOUSE Protein Chd3 OS=Mus musculus GN=Chd3 PE=4 SV=1;>tr|F7C528|F7C528_MOUSE Protein Chd3 (Fragment) OS=Mus musculus GN=Chd3 PE=4 SV=1	1	84.7228													1	84.7228	0.0018134	142.41		2	S	GEKMEAEVDSPSPAPSLGERLEHRKILLEDE	X;X;X;X;X;X;X;X;X;X;X;Phospho (STY);X;X;X;Phospho (STY);X;X;X;X;X;X;X;X;X;X;X;X;X;X;X	XXXPPPPPPPPPPPPPPPPPXXXXXXXXXXX	0.0018134	142.41	142.41	_MEAEVDSPS(ph)PAPS(ph)LGER_	MEAEVDS(0.001)PS(0.999)PAPS(1)LGER	MEAEVDS(-31.81)PS(31.81)PAPS(84.72)LGER	13	2	966.378	-0.69378	1.3193	NaN	1.3193	NaN	1.2536	NaN	1.2536	NaN	NaN
[truncated: 7,721 more rows]
[truncated: 113 more columns]
