# Supplementary material for: Phosphoproteomics reveals network rewiring to a pro-adhesion state in annexin-1-deficient mammary epithelial cells
Source: Breast Cancer Res. 2017 Dec 12;19:132. doi: 10.1186/s13058-017-0924-4 (PMC5727667; doi:10.1186/s13058-017-0924-4)
Supplement: Supplementary file 4 — List of ANXA1-responsive phosphorylation sites in mammary epithelial cells from ANXA1-heterozygous and ANXA1-deficient mice. (XLSX 1001 kb) [file 13058_2017_924_MOESM4_ESM.xlsx]

## Sheet: Sheet1
Table S2: List of ANXA1-responsive phosphorylation sites in mammary epithelial cells from ANXA1-heterozygous and ANXA1-deficient mice
Leading proteins	Gene names	Sequence window	Modified sequence	Fwd1 Robust Z score	Fwd2 Robust Z score	Rev1 Robust Z score (inverse)	Rev2 Robust Z score (inverse)	Median Robust Z score	Site Status	Amino acid	Position	Charge	Multiplicity	Localization probability	Unique identifier	Log2 Fwd1	Log2 Fwd2	Log2 Rev1 (inverse)	Log2 Rev2
A1A5B6	Tbc1d25;Tbc1d25	SSQGPSGGGRLLRQASLDGLQQLRDNMGLRK	_QAS(ph)LDGLQQLR_	0.0607775	-0.594282	-1.03176	-1.50219	-0.813021		S	560	2	___1	1	UID2	-0.000115405	-0.30308	0.447949	0.624429
A1BN54	Actn1;Actn4;Actn4;Actn3;Actn4;Actn4;Actn1;Actn2	GMIWTIILRFAIQDISVEETSAKEGLLLWCQ	_FAIQDIS(ph)VEETSAK_	-0.168002	-2.12019	0.295346	-2.66777	-1.1441		S	160	2	___1	1	UID3	-0.0975481	-1.08387	-0.187411	1.14724
Q05BA5	Ncoa3;Ncoa3;Ncoa3	PQPVQSVRPPYNRAVSLDSPVSVGSGPPVKN	_AVS(ph)LDSPVSVGSGPPVK_	-1.58884	-0.759127	-1.48993	-2.81674	-1.53939		S	846	2	___1	1	UID6	-0.702656	-0.38743	0.667302	1.21406
Q05BA5	Ncoa3;Ncoa3;Ncoa3	SLLSTLSSPGPKLDNSPNMNISQPSKVSGQD	_LDNS(ph)PNMNISQPSK_	NaN	0.94327	1.93006	2.1254	1.93006		S	543	2	___1	1	UID7	NaN	0.483674	-0.970045	-1.00271
A2A484	Zmynd8;Zmynd8;Zmynd8;Zmynd8;Zmynd8;Zmynd8;Zmynd8;Zmynd8	PVSEKPDPTPAKDKASPEPEKDFVEKAKPSP	_DKAS(ph)PEPEKDFVEK_	0.0238873	-1.36285	-0.241123	-1.55311	-0.801986		S	674	3	___1	1	UID9	-0.0158263	-0.696354	0.0694271	0.647268
A2A484	Zmynd8;Zmynd8;Zmynd8;Zmynd8;Zmynd8;Zmynd8;Zmynd8;Zmynd8	LSESVQQQSAPVPLISPKRQIRSRFQLNLDK	_ELSESVQQQSAPVPLIS(ph)PK_	0.182491	0.85	0.620636	-0.698636	0.401563		S	553	2	___1	1	UID10	0.0517201	0.435949	-0.343147	0.263996
A2A484	Zmynd8;Zmynd8;Zmynd8;Zmynd8;Zmynd8;Zmynd8;Zmynd8;Zmynd8;Zmynd8;Zmynd8	LLSKPLLSGGAGRRISLSDMPRSPTSTNSSV	_RIS(ph)LSDMPR_	-0.805124	-0.324079	-0.652541	-0.0640773	-0.48831		S	429	2	___1	0.99997	UID11	-0.368886	-0.16482	0.266397	-0.0206331
A2A484	Zmynd8;Zmynd8;Zmynd8;Zmynd8;Zmynd8;Zmynd8;Zmynd8;Zmynd8;Zmynd8;Zmynd8	TDKQEKVKLNFDMTASPKILLSKPLLSGGAG	_LNFDMTAS(ph)PK_	0.406935	-0.00169094	0.538175	-0.332199	0.202622		S	410	2	___1	0.999979	UID12	0.147307	0.000144286	-0.303668	0.0996318
A2A484	Zmynd8;Zmynd8;Zmynd8;Zmynd8;Zmynd8;Zmynd8;Zmynd8;Zmynd8	AIGKPPPSSTSAGNQSPPETPVLTRSATQAP	_QDAIGKPPPSSTSAGNQS(ph)PPETPVLTR_	-0.272983	-0.93382	0.665657	-0.652776	-0.462879		S	763	3	___1	0.998852	UID13	-0.142258	-0.47682	-0.364701	0.243425
A2A484	Zmynd8;Zmynd8;Zmynd8;Zmynd8;Zmynd8;Zmynd8;Zmynd8;Zmynd8	KPKPTNQVEVKEEAKSNSPVSEKPDPTPAKD	_S(ph)NSPVSEKPDPTPAK_	0.0151766	-0.767067	-0.0207107	-0.649242	-0.334976		S	656	2	___1	0.987026	UID14	-0.019536	-0.391493	-0.0360968	0.24184
A2A484	Zmynd8;Zmynd8;Zmynd8;Zmynd8;Zmynd8;Zmynd8;Zmynd8;Zmynd8	KPTNQVEVKEEAKSNSPVSEKPDPTPAKDKA	_SNS(ph)PVSEKPDPTPAK_	0.138411	-0.999999	-0.0424765	-0.514825	-0.278651		S	658	2	___1	0.88605	UID15	0.0329472	-0.510683	-0.0256762	0.181548
A2A4B1	Lpin3;Lpin3;Lpin3	TPQANLSSGDLMSPKSDSELELRSLEPSPLR	_S(ph)DSELELR_	1.74738	5.8415	2.14263	7.19336	3.99207	Up	S	218	2	___1	0.999993	UID16	0.718175	2.99007	-1.07182	-3.27593
A2A4P5	Aarsd1;Aarsd1	STKRPPPAMDDLDDDSDS_____________	_RPPPAMDDLDDDS(ph)DS_	1.29041	-0.432757	NaN	2.58625	1.29041		S	147	2	___1	0.997515	UID19	0.523562	-0.220429	#VALUE!	-1.20943
A2A4P4	Aarsd1;Aarsd1;Aarsd1	TRRGAQADHFTESPLSPGSQVQVRVDWERRF	_GAQADHFTESPLS(ph)PGSQVQVR_	1.21174	0.0591069	-2.48245	-2.91854	-1.21167		S	219	3	___1	0.975757	UID21	0.490057	0.0312541	1.14248	1.25972
A2A5R2	Arfgef2;Arfgef2	MQSKPQSPVIQATAGSPKFSRLKQSQAQSKP	_PQSPVIQATAGS(ph)PK_	0.890943	-0.943016	1.20745	-1.28045	-0.0260365		S	227	2	___1	1	UID24	0.353436	-0.481525	-0.624088	0.524966
A2A5R2	Arfgef2	SSIDRNASERGQSQLSNPTDDSWKGAPYAHQ	_GQSQLS(ph)NPTDDSWK_	-0.283093	-0.0131035	-0.326907	0.107158	-0.148098		S	1535	2	___1	0.999989	UID26	-0.146563	-0.00569543	0.110497	-0.0974402
A2A5V4	Sh3bp1;Sh3bp1;Sh3bp1;Sh3bp1	LTSLDTALAELRDNHSQADHSPLTTAAPFSR	_DNHS(ph)QADHSPLTTAAPFSR_	-2.21742	-2.86032	-2.64881	-2.68847	-2.66864	Down	S	257	3	___1	0.975212	UID27	-0.970356	-1.46259	1.22212	1.15653
A2A5V4	Sh3bp1;Sh3bp1;Sh3bp1;Sh3bp1	TALAELRDNHSQADHSPLTTAAPFSRVYGVS	_DNHSQADHS(ph)PLTTAAPFSR_	-2.30271	-2.75919	-2.66927	-2.20519	-2.48599	Down	S	262	3	___1	0.991152	UID28	-1.00668	-1.41085	1.23192	0.939753
A2A5V4	Sh3bp1;Sh3bp1;Sh3bp1;Sh3bp1	MAVRERTEADLPKPTSPKVSRNPTETAASAE	_ERTEADLPKPTS(ph)PK_	1.01102	0.61519	0.837832	0.432078	0.726511		S	535	3	___1	0.968218	UID29	0.404576	0.315798	-0.447131	-0.243182
A2A654	Bptf;Bptf;Bptf	KPDPKDQVLDDVSIQSPGPNCQRQNSVESDL	_DQVLDDVSIQS(ph)PGPNCQR_	0.853617	1.08445	0.484502	0.578461	0.716039		S	1302	2	___1	1	UID32	0.33754	0.555914	-0.277971	-0.308841
A2A654	Bptf;Bptf;Bptf	KEPEKKDQDVKELLDSDNDKSFKEEPMEIDD	_ELLDS(ph)DNDK_	-0.0311158	-0.166547	0.279671	-0.662271	-0.0988314		S	1133	2	___1	1	UID33	-0.039251	-0.0842114	-0.179907	0.247684
A2A654	Bptf;Bptf;Bptf	LVATQCQPQSSVQGQSPVRVQSPPLTRIRPS	_PLVATQCQPQSSVQGQS(ph)PVR_	0.595801	-0.348554	0.849481	-0.448056	0.123624		S	2462	2	___1	1	UID36	0.227741	-0.177343	-0.452708	0.151599
A2A654	Bptf;Bptf;Bptf	DVSIQSPGPNCQRQNSVESDLDARISEPAGK	_QNS(ph)VESDLDAR_	-0.221964	-1.04384	NaN	-0.468262	-0.468262		S	1312	2	___1	0.999509	UID37	-0.120529	-0.533117	#VALUE!	0.160662
A2A690-2	Tanc2;Tanc2	PPHTSPAHQGASYRFSPPPVGGQSKEYPSPP	_FS(ph)PPPVGGQSK_	-1.28297	1.2655	-0.532949	2.13063	0.366276		S	1531	2	___1	1	UID39	-0.572394	0.648557	0.209141	-1.00506
A2A699	Fam171a2	PGSLHSAFSSSRDLASSRDDFFRAKPRSASR	_DLAS(ph)SRDDFFR_	4.1709	2.36373	4.92123	2.68918	3.43004	Up	S	409	2	___1	0.846052	UID41	1.75031	1.21051	-2.40209	-1.2556
A2A699	Fam171a2	GSLHSAFSSSRDLASSRDDFFRAKPRSASRP	_DLASS(ph)RDDFFR_	5.23256	2.58597	4.92123	3.12331	4.02227	Up	S	410	2	___1	0.801706	UID42	2.20245	1.32423	-2.40209	-1.45032
A2A6A1	Gpatch8	RSTRSPSQRSGSRKGSWGHESPEERRSGRRD	_KGS(ph)WGHES(ph)PEER_	-1.81428	-0.729557	-0.632935	0.109327	-0.681246		S	1013	3	___1	1	UID43	-0.798667	-0.3723	0.257011	-0.0984129
A2A6A1	Gpatch8	PSQRSGSRKGSWGHESPEERRSGRRDFIRSK	_KGS(ph)WGHES(ph)PEER_	0.469967	-0.0431544	0.396218	0.562484	0.433092		S	1018	3	___1	1	UID44	0.174151	-0.0210723	-0.235705	-0.301675
A2A6A1	Gpatch8	ACSSLNKQEPGGSHMSETEDTGRSHPSKKEP	_QEPGGSHMS(ph)ETEDTGR_	-0.44161	-0.641072	-0.341108	-0.539967	-0.490788		S	648	2	___1	0.99206	UID45	-0.214073	-0.327023	0.117296	0.192825
P19973-2	Lsp1;Lsp1;Lsp1	ATESSGRTPKLSRQPSIELPSMAVASTKTLW	_QPS(ph)IELPSMAVASTK_	3.49344	4.23155	2.32254	4.86741	3.8625	Up	S	241	2	___1	0.999994	UID46	1.46179	2.16627	-1.15795	-2.23263
A2A6T1	Cdr2l	ISRDSSWRDLLGGEESPGEGKAGEKSLSQHV	_DLLGGEES(ph)PGEGK_	0.0250172	-0.637008	0.528891	1.94032	0.276954		S	407	2	___1	1	UID47	-0.015345	-0.324943	-0.299223	-0.919697
A2A6T1	Cdr2l	LCTSSRCEDAFRLHSSSLELGPRPLEQENER	_LHSS(ph)SLELGPR_	2.32561	0.196156	-0.542579	0.110326	0.153241		S	179	2	___1	0.991823	UID48	0.964436	0.101381	0.213752	-0.0988608
A2A791	Zmym4	TDGSLEVERRAAHQESDNENEIQIQNQLKKD	_AAHQES(ph)DNENEIQIQNQLK_	-0.443694	-0.753343	-0.807572	-0.124519	-0.598518		S	121	3	___1	1	UID50	-0.21496	-0.384471	0.340619	0.00647763
A2A7B5	Prdm2	SPSSTNCESKKRRTASPPVLPKIKAETDSDS	_TAS(ph)PPVLPK_	-0.564322	-0.128752	-0.681711	0.158249	-0.346537		S	638	2	___1	1	UID52	-0.266333	-0.0648722	0.280362	-0.120357
A2A7F4	Rlf;Rlf	KKLLLKSAQRGIYPKSPTGSLEQNPEQARGE	_S(ph)PTGSLEQNPEQAR_	-0.825967	0.422803	-0.309832	0.173354	-0.068239		S	631	2	___1	0.999812	UID53	-0.377763	0.217355	0.102322	-0.127132
A2A7S8-2	Kiaa1522	QKKPSKAPPPVARKPSVGVPPPSPSLPRTES	_KPS(ph)VGVPPPSPSLPR_	-5.54415	-4.946	-6.83309	NaN	-5.54415	Down	S	1009	3	___1	1	UID55	-2.38715	-2.52982	3.22538	#VALUE!
A2A7S8-2	Kiaa1522	IFSKGTKKLQLERPVSPEAQADLQRNLVAEL	_LQLERPVS(ph)PEAQADLQR_	NaN	-3.49522	-5.60906	-0.564635	-3.49522		S	966	3	___1	1	UID57	NaN	-1.78747	2.63937	0.20389
A2A837	Srsf4;Srsf4;Srsf4;Srsf5;Srsf5;Srsf6	APPVRTENRLIVENLSSRVSWQDLKDFMRQA;GPPTRTEYRLIVENLSSRCSWQDLKDYMRQA;GPPVRTEYRLIVENLSSRCSWQDLKDFMRQA	_LIVENLS(ph)SR_	2.10728	-0.912477	0.711399	-0.78401	-0.0363055		S	118	2	___1	0.948952	UID58	0.871449	-0.465899	-0.3866	0.30229
A2A837	Srsf4;Srsf4;Srsf4;Srsf5;Srsf5;Srsf6	PPTRTEYRLIVENLSSRCSWQDLKDYMRQAG;PPVRTENRLIVENLSSRVSWQDLKDFMRQAG;PPVRTEYRLIVENLSSRCSWQDLKDFMRQAG	_LIVENLSS(ph)R_	-2.72916	NaN	5.50773	-3.20101	-2.72916		S	119	2	___1	0.96322	UID59	-1.1883	NaN	-2.68288	1.38642
A2A841	Epb4.1;Epb41;Epb4.1;Epb4.1;Epb4.1;Epb4.1;Epb41l2	KKRERLDGENIYIRHSNLMLEDLDKSQEEIK;KNTLRVDGDNIYVRHSNLMLEDLDKAQEAIL;SLIKRIKGENVYVKHSNLMLEDLDKTQDELM	_HS(ph)NLM(ox)LEDLDK_	5.98102	3.01322	4.8216	-0.220725	3.91741	Up	S	610	2	___1	1	UID60	2.5212	1.54285	-2.35439	0.0496307
A2A870	Fbf1	TATKLPAVERKPAPKSPGAAAGQGPSVPLTP	_S(ph)PGAAAGQGPSVPLTPGDTPIR_	-0.528414	-0.00671363	0.133322	0.496989	0.0633042		S	206	2	___1	0.999999	UID61	-0.251041	-0.00242579	-0.109841	-0.272297
A2A8R0	Zfyve9;Zfyve9	EAEISSRPCLALAPDSPDNDLRASQFGISAR	_PCLALAPDS(ph)PDNDLR_	0.332093	1.50536	0.237838	1.92817	0.918727		S	640	2	___1	1	UID63	0.115433	0.771294	-0.159879	-0.914249
A2A8R7	Zcchc11;Zcchc11	ENTPTSQMKLQKTPRSPLEPENVPSLLLKEN	_S(ph)PLEPENVPSLLLK_	-1.75557	-1.9198	-1.63152	-0.714401	-1.69355		S	176	2	___1	1	UID64	-0.773664	-0.981337	0.735089	0.271067
A2A8R7	Zcchc11;Zcchc11	EKTPSLQTKAEKVPKSPNLPVKAEKAPCTTA	_VPKS(ph)PNLPVK_	0.994348	-0.36669	NaN	0.308219	0.308219		S	131	3	___1	1	UID65	0.397474	-0.186623	#VALUE!	-0.187625
A2A8U2	Tmem201	RVSPSSLPGRLSRALSLGTIPPLTRTDSGYL	_ALS(ph)LGTIPPLTR_	-4.19278	-2.31406	-3.85549	-1.25712	-3.08478	Down	S	454	2	___1	0.999992	UID66	-1.81162	-1.18308	1.79983	0.514501
E9PUK6	Srrm1;Srrm1;Srrm1;Srrm1;Srrm1	RVSRTPEPKKIKKAASPSPQSVRRVSSSRSV	_KAAS(ph)PSPQSVR_	0.0452256	0.885827	-0.0692592	0.673889	0.359557		S	756	2	___1	1	UID67	-0.00673869	0.454281	-0.0128538	-0.351645
E9PUK6	Srrm1;Srrm1;Srrm1;Srrm1;Srrm1	SRTPEPKKIKKAASPSPQSVRRVSSSRSVSG	_AASPS(ph)PQSVR_	0.0705204	0.740136	-0.50519	NaN	0.0705204		S	758	2	___1	0.992205	UID68	0.00403388	0.379732	0.195852	#VALUE!
E9PUK6	Srrm1;Srrm1;Srrm1;Srrm1;Srrm1;Srrm1	LKAPKPEPVPEPKEPSPEKNSKKEKEKTRPR	_APKPEPVPEPKEPS(ph)PEK_	-1.78886	-1.25608	-0.0113653	-0.0749561	-0.665518		S	260	3	___1	1	UID69	-0.787842	-0.641716	-0.040571	-0.0157534
E9PUK6	Srrm1;Srrm1;Srrm1;Srrm1;Srrm1;Srrm1	NKRHSPSPRPRAPQTSSPPPVRRGASASPQG	_APQTS(ph)SPPPVR_	-0.415502	-0.794271	-0.42386	-0.50346	-0.46366		S	713	2	___1	0.998634	UID70	-0.202954	-0.405413	0.156914	0.17645
E9PUK6	Srrm1;Srrm1;Srrm1;Srrm1;Srrm1;Srrm1	KRHSPSPRPRAPQTSSPPPVRRGASASPQGR	_APQTSS(ph)PPPVR_	-0.235173	-0.683944	-0.136516	-0.629598	-0.432385		S	714	2	___1	0.998616	UID71	-0.126155	-0.34896	0.019346	0.233029
E9PUK6	Srrm1;Srrm1;Srrm1;Srrm1;Srrm1;Srrm1	TKSRSPSPAPEKKEKSPELPEPSVRMKDSSV	_S(ph)PELPEPSVR_	-0.380628	-0.540327	-0.424671	-0.417508	-0.42109		S	220	2	___1	1	UID72	-0.188102	-0.275472	0.157303	0.137897
E9PUK6	Srrm1;Srrm1;Srrm1;Srrm1;Srrm1	TSGKVTKHKGTEKRESPSPAPKPRKVELSES	_RES(ph)PS(ph)PAPKPR_	-0.50251	1.83208	0.0246783	1.55839	0.791534		S	448	3	___1	1	UID73	-0.240009	0.938474	-0.0578272	-0.748384
E9PUK6	Srrm1;Srrm1;Srrm1;Srrm1;Srrm1	GKVTKHKGTEKRESPSPAPKPRKVELSESEE	_RES(ph)PS(ph)PAPKPR_	-1.32627	2.01685	-0.572828	NaN	-0.572828		S	450	3	___1	1	UID74	-0.590832	1.03302	0.228234	#VALUE!
E9PUK6	Srrm1;Srrm1;Srrm1;Srrm1;Srrm1	RLSPSASPPRRRHRPSSPATPPPKTRHSPTP	_HRPS(ph)S(ph)PATPPPK_	-1.15069	-0.17307	-0.735809	0.655065	-0.454439		S	400	2	___1	0.988485	UID75	-0.516058	-0.0875494	0.306262	-0.343202
E9PUK6	Srrm1;Srrm1;Srrm1;Srrm1;Srrm1	LSPSASPPRRRHRPSSPATPPPKTRHSPTPQ	_HRPSS(ph)PAT(ph)PPPK_	-0.999858	-0.118097	-0.493063	0.406748	-0.30558		S	401	3	___1	0.995273	UID76	-0.45182	-0.0594198	0.190046	-0.23182
E9PUK6	Srrm1;Srrm1;Srrm1;Srrm1	QEEPAAAPEPRKETESEAEDDNLDDLERHLR	_KET(ph)ES(ph)EAEDDNLDDLER_	NaN	-0.935233	0.011377	-0.130277	-0.130277		S	892	2	___1	1	UID77	NaN	-0.477542	-0.0514591	0.0090604
E9PUK6	Srrm1;Srrm1;Srrm1;Srrm1;Srrm1;Srrm1	SGSPEPAAKKPPAPPSPVQSQSPSTNWSPAV	_KPPAPPS(ph)PVQS(ph)QSPSTNWSPAVPAK_	-0.642008	-0.454323	-0.223265	-0.4697	-0.462012		S	787	3	___1	0.999918	UID78	-0.299418	-0.231464	0.0608775	0.161307
E9PUK6	Srrm1;Srrm1;Srrm1;Srrm1;Srrm1	RESPSPAPKPRKVELSESEEDKGSKMAAADS	_KVELS(ph)ES(ph)EEDK_	-0.207338	-0.360632	-0.992624	0.324046	-0.283985		S	461	2	___1	1	UID82	-0.114301	-0.183523	0.429214	-0.194724
E9PUK6	Srrm1;Srrm1;Srrm1;Srrm1;Srrm1	SPSPAPKPRKVELSESEEDKGSKMAAADSVQ	_KVELS(ph)ES(ph)EEDK_	NaN	-0.662765	-0.856433	0.274621	-0.662765		S	463	2	___1	1	UID83	NaN	-0.338123	0.364012	-0.172555
E9PUK6	Srrm1;Srrm1;Srrm1;Srrm1;Srrm1;Srrm1	RRRRSPSPPPARRRRSPSPAPPPPPPPPPPR	_S(ph)PS(ph)PAPPPPPPPPPPR_	-1.72134	-1.39719	-0.158439	-0.523322	-0.960256		S	572	3	___1	1	UID88	-0.759087	-0.713923	0.0298416	0.185359
E9PUK6	Srrm1;Srrm1;Srrm1;Srrm1;Srrm1;Srrm1	RRSPSPPPARRRRSPSPAPPPPPPPPPPRRR	_S(ph)PS(ph)PAPPPPPPPPPPR_	-0.374728	-1.65057	-0.0982162	NaN	-0.374728		S	574	3	___1	1	UID89	-0.185589	-0.843578	0.00100955	#VALUE!
E9PUK6	Srrm1;Srrm1;Srrm1;Srrm1;Srrm1;Srrm1	QRRYSPSPPPKRRTASPPPPPKRRASPSPPP	_RRT(ph)AS(ph)PPPPPK_	0.162167	0.391099	0.256479	0.532848	0.323789		S	635	3	___1	1	UID90	0.0430645	0.201132	-0.168804	-0.288382
E9PUK6	Srrm1;Srrm1;Srrm1;Srrm1;Srrm1;Srrm1	PSPPPRRRSPSPRRYSPPIQRRYSPSPPPKR	_RYS(ph)PPIQR_	-0.380589	-0.747717	-0.497287	-0.618907	-0.558097		S	616	2	___1	1	UID93	-0.188085	-0.381592	0.192068	0.228234
Q9JKK0	Rcan3;Rcan3;Rcan3;Rcan1;Rcan1	LPPQPTKQFLISPPASPPVGWKQSEDAMPVI	_QFLIS(ph)PPAS(ph)PPVGWK_	1.23266	0.925267	2.50022	2.35076	1.79171		S	152	2	___1	1	UID102	0.498966	0.474462	-1.24301	-1.1038
A2A9C3	Szt2	FRKPSRLPLEPETPGSLVGSPREASGMMLAP	_LPLEPETPGS(ph)LVGSPR_	-0.0793915	-0.75268	NaN	-2.04587	-0.75268		S	3226	2	___1	0.952718	UID103	-0.0598107	-0.384132	#VALUE!	0.868292
A2A9C3	Szt2	SRLPLEPETPGSLVGSPREASGMMLAPGPAP	_LPLEPETPGSLVGS(ph)PR_	0.026147	-1.06765	0.327949	-1.50699	-0.520752		S	3230	2	___1	0.999999	UID104	-0.0148639	-0.545298	-0.20302	0.626579
Q8BMK0	Cep85;Ccdc21;Ccdc21	MAMQEKYPNDRSHATSPGSNVIQKGSSLGTE	_SHATS(ph)PGSNVIQK_	-1.9895	-1.22189	-1.78814	-0.745436	-1.50501		S	16	2	___1	0.984989	UID105	-0.873291	-0.624221	0.810073	0.284988
Q8R1A4	Dock7;Dock7;Dock7	SCFEYKGKKVFERMNSLTFKKSKDMRAKLEE	_MNS(ph)LTFK_	1.18535	-0.0278898	-0.205009	0.154476	0.0632931		S	1382	2	___1	1	UID106	0.478817	-0.0132615	0.0521377	-0.118664
Q8R1A4	Dock7;Dock7;Dock7;Dock7;Dock7	SVHYATMARSAVRPASLNLNRSRSLSNSNPD	_PAS(ph)LNLNR_	2.86204	0.00450445	2.88933	0.753123	1.80758		S	888	2	___1	1	UID108	1.19289	0.00331442	-1.4293	-0.387185
Q8R1A4	Dock7;Dock7;Dock7	MAIAGTSVPQLTRPGSFLLTSTSGRQHTTFS	_PGS(ph)FLLTSTSGR_	3.2649	1.37884	3.10905	1.18286	2.24395		S	1305	2	___1	1	UID109	1.36446	0.706553	-1.5345	-0.579943
Q8R1A4	Dock7;Dock7;Dock7	RTVAAEVRKQISGQYSGSPQLLKNLNIVGNI	_QISGQYS(ph)GSPQLLK_	4.3631	3.79827	4.00825	0.87041	3.90326	Up	S	28	2	___1	0.849198	UID110	1.83216	1.94456	-1.965	-0.439794
Q8R1A4	Dock7;Dock7;Dock7	VAAEVRKQISGQYSGSPQLLKNLNIVGNISH	_QISGQYSGS(ph)PQLLK_	4.32858	3.53898	2.88204	2.56173	3.21051	Up	S	30	2	___1	0.997692	UID111	1.81746	1.81188	-1.42581	-1.19843
Q8R1A4	Dock7;Dock7;Dock7	DGSSYQDEQDDLKRRSMSIDDTPRGSWACSI	_S(ph)MS(ph)IDDTPR_	1.68146	0.500774	NaN	1.06027	1.06027		S	180	2	___1	1	UID113	0.690104	0.257252	#VALUE!	-0.524957
Q8R1A4	Dock7;Dock7;Dock7	SSYQDEQDDLKRRSMSIDDTPRGSWACSIFD	_S(ph)MS(ph)IDDTPR_	-3.45937	NaN	-1.25911	1.20704	-1.25911		S	182	2	___1	1	UID114	-1.49928	NaN	0.556797	-0.590788
Q8R1A4	Dock7;Dock7;Dock7	EVRSIIGSKGLDRSNSWVNTGPKAAPWGSNP	_SNS(ph)WVNTGPK_	4.93061	3.43702	-0.08657	-0.73433	1.67522		S	929	2	___1	0.999999	UID115	2.07385	1.75971	-0.00456613	0.280006
Q8R1A4	Dock7;Dock7;Dock7;Dock7	ARQEMVRRSRGQLERSPSGSAFGSQENLRWR	_S(ph)PSGSAFGSQENLR_	2.47737	2.01657	1.76122	1.62499	1.8889		S	1420	2	___1	0.999307	UID116	1.02906	1.03288	-0.889209	-0.778259
Q8R1A4	Dock7;Dock7;Dock7;Dock7	QEMVRRSRGQLERSPSGSAFGSQENLRWRKD	_SPS(ph)GSAFGSQENLR_	2.46423	1.12103	1.53294	1.94397	1.73846		S	1422	2	___1	0.998399	UID117	1.02347	0.574634	-0.779918	-0.921335
Q8R1A4	Dock7;Dock7;Dock7	RNSSLVGRRSLERTTSGDDACNLTSFRPATL	_TTS(ph)GDDACNLTSFR_	1.49213	1.54033	0.615594	2.08353	1.51623		S	452	2	___1	0.993105	UID119	0.609471	0.789187	-0.340733	-0.983932
P58058	Nadk;Nadk	ASPALGSTKEFRRTRSLHGPCPVTTFGPKAC	_S(ph)LHGPCPVTTFGPK_	-0.575994	1.61948	-0.311235	-1.14066	-0.443615		S	64	2	___1	1	UID120	-0.271304	0.829687	0.102994	0.462262
P24788	Cdk11b;Cdk11b	IKRLKNSDDRDSKRDSLEEGELRDHRMEITI	_RDS(ph)LEEGELR_	-0.132846	0.186151	-0.207334	0.243417	0.0266525		S	47	3	___1	1	UID124	-0.0825759	0.0962619	0.0532505	-0.158558
Q8R516	Mib2;Mib2	HLPKLGKPAELQRRVSADGQPFQRGDKVKCL	_RVS(ph)ADGQPFQR_	1.9465	1.87385	2.39756	4.55889	2.17203		S	251	2	___1	1	UID125	0.802979	0.959844	-1.19387	-2.09425
A2A9Q2	Nrd1;Nrd1;Nrd1	DLGESGRLARLGADESEEEGRSFSNVGDPEI	_LGADES(ph)EEEGR_	-0.260408	0.923033	-0.0647562	0.522456	0.22885		S	85	2	___1	1	UID126	-0.136902	0.473319	-0.0150097	-0.28372
Q6NXN1	D4Ertd22e;D4Ertd22e;D4Ertd22e	QREAEYAEARRRILGSASPEEEQEKPILDRP	_ILGS(ph)ASPEEEQEKPILDRPTR_	NaN	-1.02303	-3.93677	-0.512555	-1.02303		S	105	3	___1	0.801276	UID127	NaN	-0.522468	1.83875	0.18053
Q6NXN1	D4Ertd22e;D4Ertd22e;D4Ertd22e	EAEYAEARRRILGSASPEEEQEKPILDRPTR	_ILGSAS(ph)PEEEQEKPILDRPTR_	-2.3592	-1.54355	NaN	-0.255651	-1.54355		S	107	3	___1	0.869406	UID128	-1.03074	-0.788813	#VALUE!	0.0652966
Q6NXN1	D4Ertd22e;D4Ertd22e;D4Ertd22e	EKKLKITQKESRKSKSPPKVPIVIQDDSLPT	_S(ph)PPKVPIVIQDDSLPTGPPPQIR_	-0.817614	-0.52362	NaN	-0.842425	-0.817614		S	39	3	___1	0.999478	UID130	-0.374206	-0.266923	#VALUE!	0.328492
A2AAE1-3	Kiaa1109	EPTCRVVFENEQDNNSLTKTQRKRSLVTSEP	_VVFENEQDNNS(ph)LTK_	1.23002	0.677691	0.283667	1.20767	0.942681		S	2755	2	___1	0.995798	UID133	0.497842	0.347779	-0.18182	-0.591071
A2AAY5	Sh3pxd2b	ELLERERQKMEPLRGSSPKPPGMILPMIPAK	_GS(ph)SPKPPGMILPMIPAK_	-0.00700908	-2.08337	-0.244854	-2.31723	-1.16411		S	550	2	___1	0.959631	UID134	-0.0289844	-1.06504	0.0712136	0.990011
A2AAY5	Sh3pxd2b	LLERERQKMEPLRGSSPKPPGMILPMIPAKH	_GSS(ph)PKPPGMILPMIPAK_	-0.0245433	-2.54927	-0.176097	-2.62273	-1.36268		S	551	3	___1	0.914107	UID135	-0.0364519	-1.30344	0.0382958	1.12704
A2AAY5	Sh3pxd2b	LKKNSGEPLPPKLGPSSPAHSGALDLDGVSR	_LGPS(ph)SPAHSGALDLDGVSR_	NaN	-3.22197	-2.518	-3.07095	-3.07095	Down	S	290	2	___1	0.869786	UID136	NaN	-1.64765	1.1595	1.32809
A2AAY5	Sh3pxd2b	KKNSGEPLPPKLGPSSPAHSGALDLDGVSRH	_LGPSS(ph)PAHSGALDLDGVSR_	-6.49069	-3.22197	NaN	-2.94089	-3.22197	Down	S	291	3	___1	0.805041	UID137	-2.79026	-1.64765	#VALUE!	1.26975
Q99PQ2-2	Trim11;Trim11	PLAKMAEMARRLHPPSPVPQGVCAAHREPLT	_LHPPS(ph)PVPQGVCAAHR_	-1.18326	-1.20542	-1.33177	-0.108018	-1.19434		S	85	3	___1	1	UID139	-0.529927	-0.615795	0.591584	-0.000923595
A2ABV5	Med14;Med14	YTMVSPSGRAGNWPGSPQVSGPSPATRLPGM	_AGNWPGS(ph)PQVSGPSPATR_	-2.09917	0.702615	-0.251443	0.759734	0.225586		S	1117	2	___1	1	UID140	-0.919997	0.360533	0.0743683	-0.39015
O54864-2	Suv39h1;Suv39h1	STRMDSNFGLAGLPGSPKKRVRIECKCGTTA	_M(ox)DSNFGLAGLPGS(ph)PK_	-0.0660355	-0.0720832	0.885869	-1.88159	-0.0690593		S	432	2	___1	1	UID141	-0.0541227	-0.0358749	-0.470129	0.794603
A2ACM0	Rptor;Rptor;Rptor	QRILDTSSLTQSAPASPTNKGMHMHQVGGSP	_ILDTSSLTQSAPAS(ph)PTNK_	0.337093	0.00253468	0.250287	0.3438	0.29369		S	863	2	___1	0.999999	UID143	0.117562	0.00230651	-0.165839	-0.203585
A2ACV6	9830001H06Rik;Soga	GIVQEFFRNVCGRAPSPTTAAGEESCKKPEP	_APS(ph)PTTAAGEESCK_	-0.0620284	1.17206	0.89804	2.70165	1.03505		S	1536	2	___1	0.99682	UID144	-0.0524161	0.600745	-0.475956	-1.26119
A2AEG2	Ofd1;Ofd1	AFRTYYQRATQNPSTSPQPAKSPPSVNSVAA	_ATQNPSTS(ph)PQPAK_	1.21824	0.407483	1.68952	1.13211	1.17517		S	666	2	___1	0.993048	UID145	0.492827	0.209516	-0.854883	-0.557179
A2AES4	Otud5;Otud5;Otud5;Otud5	ERDRDSGVVGARPRASPPPQGPLPGPPGALH	_PRAS(ph)PPPQGPLPGPPGALHR_	-0.628652	-1.04156	0.490097	-0.729558	-0.679105		S	64	3	___1	1	UID146	-0.29373	-0.531949	-0.28065	0.277866
A2AES4	Otud5;Otud5;Otud5;Otud5	PGTSSQFSAGGDRATSPLVSLYPALECRALI	_ATS(ph)PLVSLYPALECR_	-0.892911	-1.42662	0.637003	NaN	-0.892911		S	508	2	___1	0.826287	UID147	-0.406273	-0.728981	-0.350982	#VALUE!
A2AES4	Otud5;Otud5;Otud5	KRRRQAPGVGAVGGASPEREEVGAGYNSEDE	_QAPGVGAVGGAS(ph)PER_	1.66273	0.272127	0.360522	-0.852144	0.316325		S	165	2	___1	1	UID148	0.682124	0.140255	-0.218615	0.332851
A2AEW1	Tfe3;Tfe3;Tfe3	LSPLRAASDPLLSSVSPAVSKASSRRSSFSM	_AASDPLLSSVS(ph)PAVSK_	1.02532	0.597694	1.87143	1.02744	1.02638		S	553	2	___1	0.99999	UID149	0.410667	0.306845	-0.941975	-0.510231
A2AF47	Dock11	____MAEVRKFTKRLSKPGTAAELRQSVSEA	_RLS(ph)KPGTAAELR_	-3.18961	-2.30123	-4.51198	NaN	-3.18961	Down	S	12	3	___1	0.998991	UID153	-1.3844	-1.17651	2.11413	#VALUE!
A2AFJ8	Arhgef6;Arhgef7;Arhgef7;Arhgef6;Arhgef6	KPERKPSDEEFAVRKSTAALEEDAQILKVIE;KTERKASEEEYVIRKSTAALEEDAQILKVIE	_KS(ph)TAALEEDAQILK_	4.74285	1.39022	4.25605	0.781261	2.82313		S	682	2	___1	0.999727	UID154	1.99389	0.712376	-2.08363	-0.399806
A2AFQ0	Huwe1;Huwe1;Huwe1	AMSLGQDIPMDQRAESPEEVACRKEEEERKA	_AES(ph)PEEVACR_	1.90489	0.995213	NaN	1.89573	1.89573		S	1395	2	___1	1	UID155	0.785258	0.510253	#VALUE!	-0.899695
A2AFQ0	Huwe1;Huwe1	ELEDLIDELLERDGGSGNSTIIVSRSGEDES	_DGGS(ph)GNSTIIVSR_	2.54654	NaN	2.37922	2.53036	2.53036	Up	S	2363	2	___1	1	UID156	1.05852	NaN	-1.18508	-1.18436
A2AFQ0	Huwe1;Huwe1	CIRIALPAPRGSGTASDDEFENLRIKGPNAV	_GSGTAS(ph)DDEFENLR_	3.21039	2.49884	2.20762	2.55134	2.52509	Up	S	1907	2	___1	0.999993	UID157	1.34125	1.27965	-1.10293	-1.19377
A2AFQ0	Huwe1;Huwe1	KKAKQTGRLGSSGLGSASSIQAAVRQLEAEA	_LGSSGLGS(ph)ASSIQAAVR_	NaN	3.36475	3.15142	3.06115	3.15142	Up	S	3759	2	___1	0.955986	UID158	NaN	1.72273	-1.55478	-1.42244
Q8BX17	Gemin5;Gemin5	DEPSQEAERAPSQPPSPTEERNAPVSLPELT	_APSQPPS(ph)PTEER_	0.422804	NaN	-3.22609	-4.7646	-3.22609		S	1414	2	___1	0.942895	UID159	0.154065	NaN	1.49851	2.08777
A2AG58		DELRHQRVQEESYPQSPRRGSEDFGTRNPFQ	_VQEESYPQS(ph)PR_	2.94199	NaN	1.65554	1.29579	1.65554		S	205	2	___1	0.999999	UID161	1.22694	NaN	-0.838615	-0.630595
A2AHC3	Camsap1	QDQKIKAPVHFVEPLSPTGVPGHRKPPRLGQ	_APVHFVEPLS(ph)PTGVPGHR_	-0.486068	-0.843315	-0.636715	-0.702919	-0.669817		S	1069	3	___1	0.999994	UID167	-0.233006	-0.430509	0.25882	0.265917
A2AHC3	Camsap1	TLPQSRSLPPSTHPRSPSDPGGELPEKCLFD	_S(ph)PS(ph)DPGGELPEK_	-0.452433	-0.802873	-0.568194	-0.661188	-0.614691		S	1133	2	___1	1	UID168	-0.218682	-0.409815	0.226015	0.247198
A2AHC3	Camsap1	PQSRSLPPSTHPRSPSDPGGELPEKCLFDSY	_S(ph)PS(ph)DPGGELPEK_	-0.289323	-0.913762	-0.597934	-0.672009	-0.634972		S	1135	2	___1	1	UID169	-0.149217	-0.466556	0.240253	0.252052
A2AHC3	Camsap1;Camsap1	IRTDVSPPSPQMPRTSPQAPGLVASIRSPQR	_TS(ph)PQAPGLVASIR_	-0.0894696	-0.711223	-0.469728	-0.874285	-0.590476		S	560	2	___1	0.792404	UID170	-0.0641028	-0.362918	0.178874	0.342782
Q8BWJ3	Phka2;Phka2	FPMILPTKVLSGHRKSLNLVDSPQPLLKTTP	_S(ph)LNLVDSPQPLLK_	-0.424013	-0.441607	-0.627383	-0.25196	-0.43281		S	729	2	___1	1	UID172	-0.206578	-0.224958	0.254352	0.063641
A2AI52	Usp8;Usp8	PAERDREPSKLKRSYSSPDITQALQEEEKRR	_SYS(ph)SPDITQALQEEEKR_	1.67263	0.312008	0.563536	0.835912	0.699724		S	691	3	___1	0.92703	UID173	0.686344	0.160662	-0.31581	-0.42432
Q923J1	Trpm7;Trpm7	VRPLWKKPSAVNTLSSSLPQGDRESNNPFLC	_KPSAVNTLSS(ph)SLPQGDR_	2.72089	NaN	4.10813	0.382853	2.72089		S	1299	3	___1	0.82268	UID175	1.13277	NaN	-2.01281	-0.221102
Q923J1	Trpm7;Trpm7	RPLWKKPSAVNTLSSSLPQGDRESNNPFLCN	_KPSAVNTLSSS(ph)LPQGDR_	2.80631	NaN	3.64234	0.525707	2.80631		S	1300	2	___1	0.991878	UID176	1.16916	NaN	-1.78981	-0.285179
Q923J1	Trpm7;Trpm7	NYYYSAVERNNLMRLSQSIPFVPVPPRGEPV	_LS(ph)QSIPFVPVPPR_	1.99317	-0.0249034	1.75341	-0.579123	0.864253		S	1565	2	___1	0.996001	UID177	0.822852	-0.0117334	-0.885473	0.210389
Q923J1	Trpm7;Trpm7	YYSAVERNNLMRLSQSIPFVPVPPRGEPVTV	_LSQS(ph)IPFVPVPPR_	1.66505	-0.167115	NaN	-0.649242	-0.167115		S	1567	2	___1	0.987474	UID178	0.683113	-0.0845021	#VALUE!	0.24184
E9PZY8	1110037F02Rik;Kiaa1429	FDLHSELERSFLSEPSSPGRSKTTKGFKLGK	_SFLSEPS(ph)SPGR_	-1.27061	-1.32577	-1.1855	-1.16183	-1.22805		S	1627	2	___1	0.966648	UID180	-0.567126	-0.67738	0.521553	0.47176
E9PZY8	1110037F02Rik;Kiaa1429	NCLTLAIYGSVDRVISHDRDSPPPPPPPPPP	_VIS(ph)HDRDSPPPPPPPPPPPQPQPTLK_	NaN	-1.26763	-0.238824	-0.416924	-0.416924		S	133	3	___1	0.948637	UID182	NaN	-0.647626	0.0683267	0.137635
E9PZY8	1110037F02Rik;Kiaa1429	AIYGSVDRVISHDRDSPPPPPPPPPPPQPQP	_VISHDRDS(ph)PPPPPPPPPPPQPQPTLK_	-1.94671	-1.29706	-0.0754857	-0.519076	-0.908068		S	138	3	___1	0.996636	UID183	-0.855066	-0.662689	-0.00987286	0.183455
Q9JII1	Inpp5e;Inpp5e	RSPLAGDDHSIHSARSFSLLAPIRTKDIRSR	_S(ph)FSLLAPIR_	-0.162208	-5.39038	NaN	-0.915111	-0.915111		S	259	2	___1	0.999959	UID185	-0.0950805	-2.75721	#VALUE!	0.361095
Q9JII1	Inpp5e;Inpp5e	PLAGDDHSIHSARSFSLLAPIRTKDIRSRSY	_SFS(ph)LLAPIR_	0.553886	-6.07069	NaN	-0.902817	-0.902817		S	261	2	___1	0.96155	UID186	0.20989	-3.10532	#VALUE!	0.35558
A2AIX1	Sec16a;Sec16a;Sec16a	SPVWDLGSSSLTRAPSLTSDSEGKKPAQAVK	_APS(ph)LTSDSEGK_	-2.11208	-1.597	NaN	-0.243023	-1.597		S	2101	2	___1	0.999888	UID187	-0.925495	-0.816164	#VALUE!	0.0596321
A2AIX1	Sec16a;Sec16a	DFTLNRTLENPVRMYSPSPSDGPASQQPLPN	_MYS(ph)PSPSDGPASQQPLPNHPR_	1.56201	1.29217	3.64588	1.71744	1.63972		S	1028	3	___1	0.999774	UID191	0.639232	0.662205	-1.79151	-0.819725
A2AJI0	Map7d1;Mtap7d1;Mtap7d1;Mtap7d1	RKSRAAEEKEPAAPASPAPSPVPSPTPAQPQ	_AAEEKEPAAPAS(ph)PAPS(ph)PVPS(ph)PTPAQPQK_	-0.219607	0.53524	0.903746	0.867489	0.701364		S	544	3	___1	1	UID193	-0.119526	0.274888	-0.478688	-0.438483
A2AJI0	Map7d1;Mtap7d1;Mtap7d1;Mtap7d1	AAEEKEPAAPASPAPSPVPSPTPAQPQKEQS	_AAEEKEPAAPAS(ph)PAPS(ph)PVPS(ph)PTPAQPQK_	0.112486	0.234786	0.680515	NaN	0.234786		S	548	3	___1	0.999995	UID194	0.0219061	0.121148	-0.371814	#VALUE!
A2AJI0	Map7d1;Mtap7d1	HSSPGRKTSGSRCSVSAVNLPKHVDSIINKR	_CSVS(ph)AVNLPK_	2.08964	2.88129	4.4423	1.59622	2.48547	Up	S	256	2	___1	1	UID195	0.863939	1.47534	-2.1728	-0.765352
A2AJI0	Map7d1;Mtap7d1;Mtap7d1;Mtap7d1	PSGERPERRKPGAGGSPALARRRLEATPVQK	_RKPGAGGS(ph)PALAR_	2.74843	2.06033	3.02419	2.37421	2.56132	Up	S	401	2	___1	1	UID196	1.1445	1.05527	-1.49387	-1.11432
A2AJI0	Map7d1;Mtap7d1;Mtap7d1;Mtap7d1	LKKRQSLPASIRPRLSTGSELSPKSKARPSS	_LS(ph)TGSELSPK_	-1.7067	1.46711	-1.5971	0.635905	-0.480598		S	454	2	___1	0.997452	UID197	-0.75285	0.751721	0.718614	-0.334607
A2AJI0	Map7d1;Mtap7d1;Mtap7d1;Mtap7d1	SSPSTTWHRPASPCPSPGPGHALPPKPPSPR	_PASPCPS(ph)PGPGHALPPKPPSPR_	NaN	-0.812628	2.43056	-0.134748	-0.134748		S	483	3	___1	0.987714	UID198	NaN	-0.414807	-1.20966	0.0110662
A2AJI0	Map7d1;Mtap7d1;Mtap7d1;Mtap7d1	CPSPGPGHALPPKPPSPRGTTASPKGRVRRK	_PASPCPSPGPGHALPPKPPS(ph)PR_	-2.09002	-0.698994	-1.25193	-0.426557	-0.975462		S	496	3	___1	1	UID199	-0.916099	-0.356661	0.553361	0.141956
A2AJI0	Map7d1;Mtap7d1;Mtap7d1;Mtap7d1	EKSALARERNLKKRQSLPASIRPRLSTGSEL	_RQS(ph)LPASIR_	-4.4812	-2.76009	-3.84117	NaN	-3.84117	Down	S	444	2	___1	0.999958	UID201	-1.93446	-1.41131	1.79298	#VALUE!
A2AJI0	Map7d1;Mtap7d1;Mtap7d1	PTATGPREAKPSRRSSQPSPTTVPASDSPPA	_RSS(ph)QPSPTTVPASDSPPAK_	-1.39226	-0.828043	-0.986351	1.72614	-0.907197		S	115	2	___1	0.999519	UID202	-0.618938	-0.422695	0.426211	-0.823626
A2AJI0	Map7d1;Mtap7d1	LPKHVDSIINKRLSKSSATLWNSPSRNRSLQ	_S(ph)SATLWNSPSR_	3.62467	3.32466	NaN	1.60794	3.32466		S	275	2	___1	0.81575	UID203	1.51768	1.70221	#VALUE!	-0.770609
A2AJI0	Map7d1;Mtap7d1;Mtap7d1	IRQQRWSWAGALHHSSPGRKTSGSRCSVSAV	_WSWAGALHHSS(ph)PGR_	0.954769	0.366713	0.713251	0.152765	0.539982		S	243	3	___1	0.953222	UID204	0.380619	0.188654	-0.387487	-0.117897
A2AJT5	Sfrs18;Pnisr;Sfrs18	QNRRERPPSFRDRQRSPIALPVKQEPPQIDA	_S(ph)PIALPVK_	0.0176481	-0.392089	-0.0690161	-0.2039	-0.136458		S	211	2	___1	1	UID205	-0.0184834	-0.19962	-0.0129702	0.042084
Q8K2F0-2	Brd3;Brd3	TTTPTTSAITASRSESPPPLSEPKQAKVVAR	_SES(ph)PPPLSEPK_	0.0856879	-0.299126	-1.05048	-1.23792	-0.674803		S	262	2	___1	0.999985	UID206	0.0104934	-0.152051	0.456911	0.505891
A2AKD7	Snta1;Snta1	PYFKNSAGGTSVGWDSPPASPLQRQPSSPGP	_NSAGGTSVGWDS(ph)PPASPLQR_	3.62999	3.48032	3.87546	1.58241	3.55516	Up	S	183	2	___1	1	UID208	1.51994	1.78186	-1.90142	-0.759161
Q8BG05	Hnrnpa3;Hnrnpa3	__MEVKPPPGRPQPDSGRRRRRRGEEGHDPK	_(ac)M(ox)EVKPPPGRPQPDS(ph)GR_	-2.1328	NaN	1.16621	0.221663	0.221663		S	14	3	___1	1	UID210	-0.934317	NaN	-0.604345	-0.148801
A2AL50	Agps;Agps;Agps	QEAPSTNECKARRAASAAGASPAATPAAPES	_AAS(ph)AAGASPAATPAAPESGTIPK_	-0.475613	1.05321	-0.499397	1.08089	0.288799		S	78	2	___1	1	UID211	-0.228554	0.539928	0.193078	-0.534203
A2AL50	Agps;Agps;Agps	TNECKARRAASAAGASPAATPAAPESGTIPK	_AASAAGAS(ph)PAATPAAPESGTIPK_	0.133772	-0.632773	0.47888	-0.182902	-0.024565		S	83	2	___1	1	UID212	0.0309717	-0.322776	-0.27528	0.0326651
A7TU71	Shroom2;Shroom2	NFGPVWYVPDKKKAPSPPPLGLPLRSDSFSV	_KAPS(ph)PPPLGLPLR_	-3.06247	-3.84535	-4.13515	-0.948493	-3.45391	Down	S	318	2	___1	1	UID213	-1.33025	-1.96663	1.93372	0.376068
A7TU71	Shroom2;Shroom2	VEAPHRARPPEPRPPSTPAPPVRDSCSSPPS	_ARPPEPRPPS(ph)TPAPPVR_	-4.12683	-4.97217	-4.34535	-0.59659	-4.23609	Down	S	1159	3	___1	0.9427	UID214	-1.78354	-2.54321	2.03436	0.218223
Q9R207	Nbn;Nbn	EEVKIPGLEQSSRKLSQETFNIKEAPKPSSK	_KLS(ph)QETFNIK_	0.496583	-0.99378	-0.802808	-2.40792	-0.898294		S	398	2	___1	1	UID216	0.185486	-0.507501	0.338339	1.03069
Q80XI3-3	Eif4g3;Eif4g3;Eif4g3	ETAAGEPTPEPPRTSSPTSLPPLARSSLPSP	_TSS(ph)PTSLPPLAR_	3.74576	2.71806	2.56146	3.66157	3.18982	Up	S	278	2	___1	0.998059	UID220	1.56925	1.39182	-1.27233	-1.69176
F6VQ19	Lrch2;Lrch2;Lrch2;Lrch2	DSMEDFYPNKNHGPDSGIGSDNGEKRLSTTE	_NHGPDS(ph)GIGSDNGEK_	3.20865	NaN	1.44644	2.12141	2.12141		S	366	2	___1	0.949885	UID221	1.34051	NaN	-0.738505	-1.00092
F6VQ19	Lrch2;Lrch2;Lrch2;Lrch2	DFYPNKNHGPDSGIGSDNGEKRLSTTEPSDD	_NHGPDSGIGS(ph)DNGEK_	2.69172	1.06211	0.999479	2.28771	1.67491		S	370	3	___1	0.999866	UID222	1.12035	0.544485	-0.524521	-1.07552
A2AN08	Ubr4	EKAAPPPPPPPPPLESSPRVKSPNKQASGEK	_AAPPPPPPPPPLES(ph)SPR_	-1.57174	0.0665464	0.43227	-0.391386	-0.16242		S	619	3	___1	0.914983	UID223	-0.695372	0.0350608	-0.252965	0.12618
A2AN08	Ubr4	KAAPPPPPPPPPLESSPRVKSPNKQASGEKG	_AAPPPPPPPPPLESS(ph)PR_	-1.06947	-0.0952439	0.298608	-0.397863	-0.246553		S	620	2	___1	0.965043	UID224	-0.481465	-0.0477261	-0.188973	0.129085
A2AN08	Ubr4;Ubr4	RVLRPRNKRRHVTLPSSPRSNTPMGDKDDDD	_HVTLPS(ph)SPR_	-0.489772	-0.214567	-0.552696	-0.0795055	-0.35217		S	2715	2	___1	0.924423	UID226	-0.234584	-0.108783	0.218595	-0.0137128
A2AN08	Ubr4;Ubr4	VLRPRNKRRHVTLPSSPRSNTPMGDKDDDDD	_HVTLPSS(ph)PR_	-0.959373	-0.13129	-0.649031	-0.131236	-0.390161		S	2716	2	___1	0.983899	UID227	-0.434578	-0.0661706	0.264717	0.00949054
Q8VEH2	Ciz1;Ciz1;Ciz1	SPQDTVKMPSKVKPGSPGLPPPLRRSTRLKT	_VKPGS(ph)PGLPPPLR_	-1.81912	-1.2487	-1.24885	-0.637798	-1.24877		S	830	2	___1	1	UID228	-0.800727	-0.63794	0.551885	0.236707
A2ANY6	Mdn1	PGVDEEDSELVAKDDSLDAGNLNKNKKHQDE	_DDS(ph)LDAGNLNK_	-0.126825	-1.10059	0.339417	-2.49183	-0.613707		S	4808	2	___1	1	UID229	-0.0800117	-0.562154	-0.208511	1.06833
A2APB8	Tpx2	VGVPEKKVIPATVPKSPVFALKNRIRVPIKD	_S(ph)PVFALK_	0.279464	1.43241	0.325625	1.99134	0.879018		S	486	2	___1	1	UID232	0.0930192	0.733962	-0.201908	-0.942584
A2APB8	Tpx2	AVEVKSSELPLTVPVSPKFSTRFQ_______	_SSELPLTVPVS(ph)PK_	0.0459742	1.69446	0.683792	2.48522	1.18913		S	737	2	___1	1	UID233	-0.00641984	0.868055	-0.373383	-1.16411
A2APF7	Zbp1;Zbp1	MLPTSELRAMALGDSSPQTTEPVLREHEVQD	_AMALGDSS(ph)PQTTEPVLR_	-5.16245	-9.29383	NaN	2.92717	-5.16245		S	384	2	___1	0.988165	UID235	-2.22459	-4.75458	#VALUE!	-1.36234
F7AA26	Gm20459;Akap2;Akap2	MVGPFKLRSRKQRTLSMIEEEIRAAQEREEE	_TLS(ph)MIEEEIR_	-0.628984	1.01415	-1.72562	0.691544	0.03128		S	984	2	___1	0.999973	UID241	-0.293872	0.519944	0.780142	-0.359564
F7AA26	Gm20459;Akap2;Akap2	YKTAPGKIEKVKPPPSPTTEGPSLQPDLAPE	_VKPPPS(ph)PTTEGPSLQPDLAPEEAAGTQRPK_	NaN	-1.10755	-1.73018	0.140607	-1.10755		S	1043	4	___1	0.906185	UID242	NaN	-0.565716	0.782325	-0.112444
A2APM2	Cd44;Cd44;Cd44;Cd44;Cd44;Cd44;Cd44;Cd44;Cd44	VEDRKPSELNGEASKSQEMVHLVNKEPSETP	_S(ph)QEM(ox)VHLVNK_	-0.334782	0.627621	-0.547252	1.15438	0.146419		S	744	2	___1	1	UID245	-0.168577	0.322159	0.215989	-0.567169
Q80TY0	Fnbp1;Fnbp1;Fnbp1;Fnbp1;Fnbp1;Fnbp1;Fnbp1	VEGRLPARSEQARRQSGLYDGQTHQTVTNCA	_RQS(ph)GLYDGQTHQTVTNCAQDR_	-1.26108	1.26784	-1.9694	0.374279	-0.4434		S	496	3	___1	0.991358	UID247	-0.563071	0.649753	0.896853	-0.217256
Q922B9	Ssfa2;Ssfa2;Ssfa2	KQRYLLAKAGYPLRRSQSLPTTLLSPVRVVS	_S(ph)QSLPTTLLSPVR_	-2.08906	-3.30162	-3.36195	-1.05741	-2.69534	Down	S	736	2	___1	0.971835	UID249	-0.915691	-1.6884	1.56355	0.424922
Q922B9	Ssfa2;Ssfa2;Ssfa2	RYLLAKAGYPLRRSQSLPTTLLSPVRVVSSV	_SQS(ph)LPTTLLSPVR_	-1.87319	-3.26182	-1.15469	-2.3766	-2.12489		S	738	2	___1	0.999918	UID250	-0.823754	-1.66804	0.506805	1.01664
P16951	Atf2;Atf2;Atf2;Atf2	SVPGIPGPSSPQPVQSEAKMRLKAALTQQHP	_PVTMVPSVPGIPGPSSPQPVQS(ph)EAK_	NaN	-0.656144	-1.18382	0.635499	-0.656144		S	254	3	___1	0.97343	UID251	NaN	-0.334735	0.520749	-0.334425
A2AQN4	Acss2;Acss2;Acss2;Acss2	IVVKHLGRAELGMNDSPSQSPPVKRPCPDVQ	_AELGMNDS(ph)PSQSPPVK_	-1.59745	-2.1404	0.055163	-2.18601	-1.86892		S	263	2	___1	0.998804	UID252	-0.706324	-1.09422	-0.072422	0.931154
A2AQN4	Acss2;Acss2;Acss2;Acss2	VKHLGRAELGMNDSPSQSPPVKRPCPDVQGK	_AELGMNDSPS(ph)QSPPVK_	-1.37959	NaN	0.279432	-1.93455	-1.37959		S	265	2	___1	0.941094	UID253	-0.613542	NaN	-0.179792	0.81836
A2AQN4	Acss2;Acss2;Acss2;Acss2	HLGRAELGMNDSPSQSPPVKRPCPDVQGKLR	_AELGMNDSPSQS(ph)PPVK_	-2.05549	-1.61643	-0.110237	-1.05141	-1.33392		S	267	2	___1	0.999961	UID254	-0.901392	-0.826105	0.00676469	0.422233
A2AQN4	Acss2;Acss2;Acss2;Acss2	RAREETGAEGRVRGWSPPPEVRRSAHVPSLQ	_GWS(ph)PPPEVR_	0.0352389	-0.688688	0.81422	-0.475447	-0.220104		S	30	2	___1	1	UID255	-0.0109918	-0.351387	-0.435827	0.163885
A2ARP1	Ppip5k1;Ppip5k1;Ppip5k1;Ppip5k1;Ppip5k1	CPGKASDEPDRALQTSPQPVEGTGLPRRSPL	_ALQTS(ph)PQPVEGTGLPR_	0.702864	NaN	-0.080821	1.04449	0.702864		S	959	2	___1	0.97416	UID258	0.273337	NaN	-0.00731853	-0.517874
A2ARP8	Mtap1a;Map1a	DGAVPEKTRALGLEESPEEEGKAREQEEKYW	_ALGLEES(ph)PEEEGK_	-0.192009	0.0294293	-0.383042	0.367257	-0.0812899		S	1844	2	___1	1	UID259	-0.107772	0.0160683	0.137372	-0.214106
A2ARP8	Mtap1a;Map1a	HPGEPALGEVEERCLSPDDSTVKMASPPPSG	_CLS(ph)PDDSTVK_	0.67839	0.878203	0.696192	1.73794	0.787197		S	1219	2	___1	1	UID260	0.262914	0.45038	-0.37932	-0.828921
A2ARP8	Mtap1a;Map1a	EDKSTTPKEMTLDQKSPEKAKGVEQQDGAVP	_EMTLDQKS(ph)PEK_	0.689101	1.06675	0.36533	1.13088	0.877926		S	1818	2	___1	1	UID261	0.267476	0.546857	-0.220917	-0.556627
A2ARP8	Mtap1a;Map1a	KYWKEQDVVQGWRETSPTRGEPVPAWEGKSP	_ETS(ph)PTRGEPVPAWEGK_	1.6955	1.65229	1.77694	1.8125	1.73622		S	1872	2	___1	0.924781	UID262	0.696083	0.846473	-0.896737	-0.862365
A2ARP8	Mtap1a;Map1a	TSPTRGEPVPAWEGKSPEQEVRYWRDRDITL	_GEPVPAWEGKS(ph)PEQEVR_	-1.2079	0.00140829	-0.89459	0.067827	-0.446591		S	1886	2	___1	1	UID263	-0.540422	0.00173014	0.38228	-0.0797982
A2ARP8	Mtap1a;Map1a	EERCLSPDDSTVKMASPPPSGPPSAAHTPFH	_MAS(ph)PPPSGPPSAAHT(ph)PFHQSPVEEK_	0.317678	0.365971	0.936084	0.755311	0.560641		S	1229	3	___1	0.999554	UID266	0.109294	0.188274	-0.49417	-0.388167
A2ARP8	Mtap1a;Map1a	PEMTGQRVPSAPGQESPVPDTKSTPPTRNEP	_VPSAPGQES(ph)PVPDTK_	0.369412	1.09498	0.772646	1.83039	0.933813		S	2027	2	___1	1	UID272	0.131326	0.561302	-0.415923	-0.870387
A2ARV4	Lrp2	TEQKEAVAVAPPPSPSLPAKASKRSSTPGYT	_EAVAVAPPPSPS(ph)LPAK_	1.65109	5.85584	-0.752578	NaN	1.65109		S	4626	2	___1	0.977545	UID274	0.67717	2.9974	0.31429	#VALUE!
Q68FH0	Pkp4;Pkp4;Pkp4	QTRVASPSQGQVGSSSPKRSGMTAVPQHLGP	_VASPSQGQVGSSS(ph)PK_	1.21559	0.495816	1.05871	0.691338	0.875024		S	336	2	___1	0.999	UID275	0.491699	0.254715	-0.552876	-0.359472
Q68FH0	Pkp4;Pkp4;Pkp4	PNGPVPQYQTTTRVGSPLTLTDAQTRVASPS	_VGS(ph)PLTLTDAQTR_	1.07189	0.53687	0.901438	0.741241	0.82134		S	313	2	___1	0.999995	UID276	0.430499	0.275722	-0.477583	-0.381855
O54826	Mllt10;Mllt10;Mllt10	LGGRGSSPRGSLSPRSPVSNLQLRYDQPSNS	_S(ph)PVSNLQLR_	-1.34048	-1.37623	-0.325231	-0.857757	-1.09912		S	691	2	___1	1	UID277	-0.596885	-0.703196	0.109695	0.335369
A2ASS6	Ttn;Ttn;Ttn	KPQNPRVTDTTRTSVSLAWSVPEDEGGSKVT	_TSVS(ph)LAWSVPEDEGGSK_	0.207888	0.493215	NaN	0.389646	0.389646		S	30093	2	___1	0.887035	UID278	0.0625362	0.253384	#VALUE!	-0.224149
A2ASS6	Ttn;Ttn;Ttn	TSVSLAWSVPEDEGGSKVTGYLIEMQKVDQR	_TSVSLAWSVPEDEGGS(ph)K_	0.290879	0.2688	-0.305618	NaN	0.2688		S	30105	2	___1	0.976288	UID279	0.0978804	0.138552	0.100305	#VALUE!
Q5HZG4	Taf3;Taf3	LSPVRVQDRADLAPPSPQPPMLAPFAKSQLP	_ADLAPPS(ph)PQPPMLAPFAK_	-0.210456	-1.39585	1.01996	0.328761	0.0591525		S	243	2	___1	1	UID280	-0.115629	-0.713237	-0.534329	-0.196839
A2ATK9	Fam171a1;Fam171a1;Fam171a1	DNLTPSGTLGKDYHKSVEIFPLKARKSMEKE	_S(ph)VEIFPLK_	3.58768	3.83459	3.97096	4.12071	3.90278	Up	S	460	2	___1	1	UID281	1.50192	1.96314	-1.94714	-1.8977
Q64012	Raly;C130057N11Rik;C130057N11Rik;C130057N11Rik	QDYFCARLFDYRGRLSPVPVPRAVPVKRPRV	_LS(ph)PVPVPR_	-0.118528	-0.0758434	-0.079973	-0.248881	-0.0992505		S	135	2	___1	1	UID282	-0.0764781	-0.037799	-0.00772452	0.06226
Q64012	Raly;C130057N11Rik	CSSSSRLPAPQEDTASEAGTPQGEVQTRDDG	_LPAPQEDT(ph)AS(ph)EAGT(ph)PQGEVQTR_	0.579272	1.27035	0.902822	0.645816	0.774319		S	270	3	___1	1	UID283	0.220701	0.65104	-0.478246	-0.339053
A2AU91	Trp53bp1;Tp53bp1;Trp53bp1;Trp53bp1;Trp53bp1	DSKAETTEKDAVTEDSPQPPLPSVRDEPVRP	_DAVTEDS(ph)PQPPLPSVR_	-1.34972	-2.63677	-2.14908	-1.88659	-2.01783		S	822	2	___1	1	UID284	-0.600818	-1.34821	0.982875	0.796847
A2AU91	Trp53bp1;Tp53bp1	ADFALPSSRGGPGKLSPRKGISQTGAPVCEE	_GGPGKLS(ph)PR_	-1.27307	-1.78869	-1.29617	-1.75951	-1.52784		S	1359	2	___1	1	UID287	-0.568174	-0.914249	0.574538	0.739848
A2AU91	Trp53bp1;Tp53bp1;Trp53bp1;Trp53bp1	STSEYSQSSKMESLGSPRTEEDRENTQIDDT	_MESLGS(ph)PR_	-1.20751	-2.02852	-1.769	-1.62179	-1.69539		S	533	2	___1	1	UID289	-0.540254	-1.03697	0.80091	0.678072
A2AU91	Trp53bp1;Tp53bp1;Trp53bp1	PVGPVMDDAAPEDSASPVSQQRASQEQRASQ	_QSEQPVKPVGPVMDDAAPEDSAS(ph)PVSQQR_	-1.28902	-2.02517	NaN	-1.61152	-1.61152		S	1096	3	___1	0.941318	UID290	-0.57497	-1.03525	#VALUE!	0.673466
A2AU91	Trp53bp1;Tp53bp1;Trp53bp1;Trp53bp1	VEEQNLPLVRSEDRPSSPQVSVAAVETKEQV	_SEDRPS(ph)SPQVSVAAVETK_	-0.954798	-1.45159	-0.976017	-1.39464	-1.18533		S	267	2	___1	0.987758	UID292	-0.43263	-0.741758	0.421264	0.576184
A2AU91	Trp53bp1;Tp53bp1;Trp53bp1;Trp53bp1	PSPDAFRSTPFIVPSSPTEQGGRKDEPMDMS	_STPFIVPSS(ph)PTEQGGR_	-1.2364	-1.94182	-2.00671	-1.73283	-1.83733		S	382	2	___1	0.998072	UID294	-0.552558	-0.992604	0.914718	0.727877
A2AUD5	Tpd52l2;Tpd52l2;Tpd52l2;Tpd52l2;Tpd52l2	____MDSASQDINLNSPNKGVLSDFMTDVPV	_(ac)M(ox)DSASQDINLNS(ph)PNK_	-0.354907	1.35036	-0.169046	0.785338	0.308146		S	12	2	___1	1	UID295	-0.177147	0.691981	0.03492	-0.401635
A2AUD5	Tpd52l2;Tpd52l2;Tpd52l2;Tpd52l2;Tpd52l2	HSISMPVMRNSATFKSFEDRVGTIKSKVVGG	_NSATFKS(ph)FEDR_	1.53822	3.57235	1.0752	2.60348	2.07085		S	189	2	___1	1	UID296	0.6291	1.82896	-0.56077	-1.21716
A2AUK5	Epb4.1l1;Epb4.1l1	GSEEKVKPPRPRAPESDTGDEDQDQERDAVF	_APES(ph)DTGDEDQDQER_	-1.62459	-2.44101	-1.49068	-2.25262	-1.9386		S	578	2	___1	0.999811	UID297	-0.71788	-1.24804	0.667665	0.961031
A2AUK5	Epb4.1l1;Epb4.1l1	FEDFSRSLPELDRDKSDSETEGLVFARDLKG	_DKS(ph)DS(ph)ETEGLVFAR_	1.13884	-0.103445	0.683207	-0.364456	0.289881		S	648	2	___1	1	UID298	0.459012	-0.0519225	-0.373103	0.1141
A2AUK5	Epb4.1l1;Epb4.1l1;Epb41l1	DESGGLEDSPDRGACSTPEMPQFESVKAETM	_GACS(ph)TPEMPQFESVK_	1.09469	0.195104	1.49203	1.33083	1.21276		S	684	2	___1	0.924112	UID300	0.440208	0.100843	-0.760333	-0.646315
A2AUK5	Epb4.1l1;Epb4.1l1;Epb41l1	KGPSSQEDESGGLEDSPDRGACSTPEMPQFE	_GPSSQEDESGGLEDS(ph)PDR_	-0.396798	-2.5531	NaN	-0.189184	-0.396798		S	677	2	___1	0.99999	UID301	-0.194988	-1.3054	#VALUE!	0.0354831
A2AUK5	Epb4.1l1;Epb4.1l1;Epb41l1;Epb4.1l1	PFFERSSSKRYTMSRSLDGAEFSRPASVSEN	_S(ph)LDGAEFSR_	0.281369	-2.09206	NaN	-1.80788	-1.80788		S	430	2	___1	1	UID302	0.0938305	-1.06948	#VALUE!	0.761541
A2AUK5	Epb4.1l1;Epb4.1l1;Epb41l1;Epb4.1l1;Epb4.1l1	MIPGPQTVATEIRSLSPIIGKDVLTSTYGAT	_SLS(ph)PIIGK_	0.857368	0.44671	1.16136	1.29808	1.00936		S	782	2	___1	1	UID303	0.339137	0.229588	-0.602022	-0.631623
A2AUM0	Eif2ak4;Eif2ak4;Eif2ak4;Eif2ak4;Eif2ak4	RDPAGHRAAAILHGGSPDFVGNGKARTYSSG	_AAAILHGGS(ph)PDFVGNGK_	NaN	-2.03008	-3.06914	-1.61676	-2.03008		S	230	2	___1	1	UID304	NaN	-1.03777	1.42336	0.675816
Q3UHC7	Dab2ip;Dab2ip;Dab2ip;Dab2ip;Dab2ip;Dab2ip	IENDLSGLIDFTRLPSPTPENKDLFFVTRSS	_LPS(ph)PTPENK_	-2.08497	2.02758	-1.78229	NaN	-1.78229		S	702	2	___1	0.999971	UID306	-0.91395	1.03851	0.807272	#VALUE!
Q3UHC7	Dab2ip;Dab2ip;Dab2ip;Dab2ip;Dab2ip;Dab2ip;Dab2ip	ANEPDLQMANGSKSLSMVDLQDARTLDGEAG	_SLS(ph)MVDLQDAR_	0.826702	2.28027	0.0678004	1.26314	1.04492		S	747	2	___1	0.999772	UID308	0.326077	1.16781	-0.0784722	-0.61595
A2AUY4	Baz2b	GKHPLGSVPSATTAQSPVGKTDASLFSSGSG	_HPLGSVPSATTAQS(ph)PVGK_	-1.36671	-0.604842	-0.963615	-0.868955	-0.916285		S	1437	3	___1	0.999999	UID309	-0.608056	-0.308484	0.415326	0.340391
A2AVJ5	Prr5l;Prr5l;Prr5l;Prr5l;Prr5l	FHKMGSFRRPRPRFMSSPVLSELPRFQAARQ	_FMS(ph)SPVLSELPR_	-4.59469	-4.44981	-5.11824	-2.49429	-4.52225	Down	S	28	2	___1	0.994645	UID310	-1.98279	-2.27593	2.40439	1.06943
Q99PL5	Rrbp1;Rrbp1	ATPKEVPMVAVPPVGSKASSPATSSQGKKGQ	_EVPMVAVPPVGS(ph)K_	1.11535	2.69357	2.05979	0.685072	1.58757		S	187	2	___1	1	UID311	0.449007	1.37929	-1.03215	-0.356661
A2AW86	Ly75;Ly75	WFLLQRSHIRWTGFSSVRYEHGTNEDEVMLP	_WTGFSS(ph)VR_	1.87667	-0.0417815	1.79924	1.50199	1.65061		S	1704	2	___1	0.97941	UID312	0.773237	-0.0203697	-0.907414	-0.723087
A2AWA9	Rabgap1;Rabgap1	LVSRQGDETPSTNNGSDDEKTGLKIVGNGSE	_QGDETPSTNNGS(ph)DDEK_	-0.463489	-1.56256	NaN	-1.48735	-1.48735		S	42	2	___1	0.999963	UID313	-0.223391	-0.798542	#VALUE!	0.617769
E9QLG3	Mga;Mga;Mga	ERLHGGKGLPFYAGLSPSGKLVAYKRKPSST	_GLPFYAGLS(ph)PSGK_	NaN	-0.528272	0.185111	-2.25527	-0.528272		S	1450	2	___1	0.995395	UID314	NaN	-0.269304	-0.134635	0.962216
A2BDX0	Adnp;Adnp	GSPFDPVFEVEPKIPSDNLEEPVPKVIPEGA	_IPS(ph)DNLEEPVPK_	-0.603581	-1.05173	-0.694586	-0.874031	-0.784309		S	904	2	___1	1	UID315	-0.283053	-0.537152	0.286526	0.342669
A2BDX0	Adnp;Adnp	QNGQDKTNAPSRLNQSPGLAPVKRTYEQMEF	_LNQS(ph)PGLAPVK_	-1.04759	-0.864062	-1.08475	-1.44154	-1.06617		S	708	2	___1	1	UID316	-0.472149	-0.441125	0.473319	0.597221
A2BDX0	Adnp	SKFFSAYKSHFRNVHSEDFENRILLNCPYCT	_NVHS(ph)EDFENR_	0.0927428	4.07728	0.450134	3.31563	1.88288		S	98	2	___1	1	UID317	0.013498	2.08733	-0.261517	-1.53659
Q9EQU5	Set;Set;Set	IDEVQNEIDRLNEQASEEILKVEQKYNKLRQ	_LNEQAS(ph)EEILK_	-2.17075	-2.20389	-3.27045	-2.07394	-2.18732	Down	S	62	2	___1	1	UID319	-0.950481	-1.12671	1.51974	0.880881
Q9EQU5	Set;Set;Set	KPRPAAAPKLEDKSASPGLPKGEKEQQEAIE	_SAS(ph)PGLPK_	-1.1267	-1.26745	-0.246861	-2.04305	-1.19707		S	30	2	___1	1	UID320	-0.50584	-0.647535	0.0721745	0.867027
A2BFB0	Mlx;Mlx;Mlx	ARARRGSGRRGAPQLSPESPLLSGARGCRED	_GAPQLS(ph)PESPLLSGAR_	-1.21347	-0.920237	-1.94241	-1.36429	-1.28888		S	45	2	___1	0.999812	UID321	-0.542794	-0.469869	0.883934	0.562572
E9QAQ7	Arid1a;Arid1a	SAEATKESSKFPFGISPAQSHRNIKILEDEP	_FPFGIS(ph)PAQSHR_	-3.03854	-2.9694	-2.42025	-2.30084	-2.69482	Down	S	1946	3	___1	1	UID322	-1.32005	-1.51841	1.1127	0.982656
E9QAQ7	Arid1a;Arid1a	FSPHTSPHLPGIRGPSPSPVGSPASVAQSRS	_GPS(ph)PSPVGSPASVAQSR_	-1.18081	-1.71511	-0.989265	-1.17063	-1.17572		S	697	2	___1	0.999996	UID323	-0.528885	-0.876599	0.427606	0.475707
E9QAQ7	Arid1a;Arid1a	PQMPQYTSPQPGSALSPRQPSGGQMHSGVGS	_NPQMPQYTSPQPGSALS(ph)PR_	NaN	0.401869	-1.02512	0.705108	0.401869		S	773	2	___1	0.999694	UID324	NaN	0.206643	0.444773	-0.365648
A2CG35	Rab12;Rab12	CMDPSAALHRRPAGGSLGAVSPALSGGQARR	_RPAGGS(ph)LGAVSPALSGGQAR_	-0.802806	1.25487	-1.23773	1.45189	0.226032		S	63	3	___1	0.999868	UID326	-0.367899	0.643117	0.546561	-0.700615
A2CG35	Rab12;Rab12	AALHRRPAGGSLGAVSPALSGGQARRRKQPP	_RPAGGSLGAVS(ph)PALSGGQAR_	4.39755	2.68684	4.75123	3.1971	3.79732	Up	S	68	2	___1	1	UID327	1.84683	1.37585	-2.3207	-1.48342
A2CG63	Arid4b	PCKDCENKEVKVKEESETEIKEVNVEDSKNV	_VKEES(ph)ETEIK_	-0.273133	-0.452701	NaN	-1.21656	-0.452701		S	431	2	___1	0.877086	UID330	-0.142322	-0.230634	#VALUE!	0.496309
A2CG63	Arid4b;Arid4b	GKRRYCSADECLQTGSPGKKEDRTKSKEPLC	_YCSADECLQTGS(ph)PGK_	-0.925209	-1.13123	NaN	-1.79704	-1.13123		S	839	2	___1	0.999078	UID331	-0.420028	-0.577832	#VALUE!	0.756682
A2RSQ0	Dennd5b	RTPPQQKSPTTTRRLSITSLTGKPAKPNAGQ	_RLS(ph)ITSLTGK_	0.618291	-1.57401	0.693763	-0.27496	0.171666		S	1076	2	___1	0.999754	UID333	0.237319	-0.8044	-0.378157	0.0739573
A2RSX9	Arfip1;Arfip1;Arfip1;Arfip1	IKNPAMEKLELVRKWSLNTYKCTRQIISEKL	_KWS(ph)LNTYK_	2.86885	4.17714	2.4879	2.24837	2.67837	Up	S	132	2	___1	0.999999	UID334	1.19579	2.13842	-1.23712	-1.05787
A2RTH5	Lcmt1	DDRFGQIMIENLRRRSCDLAGVETCKSLESQ	_S(ph)CDLAGVETCK_	0.0977731	1.70218	-0.815652	1.28872	0.693247		S	247	2	___1	1	UID336	0.0156403	0.872001	0.344488	-0.627427
Q8BLX7	Col16a1;Col16a1;Col16a1;Col16a1	GGCPPETSKSRRDTQSNELIEINPQTEGKVY	_DTQS(ph)NELIEINPQTEGK_	1.92937	-0.166637	NaN	7.65444	1.92937		S	260	2	___1	0.966619	UID337	0.795684	-0.0842573	#VALUE!	-3.48274
A3KGF9		RNEREPDRQETVPATSPIPASPEGLKGESGT	_QETVPATS(ph)PIPASPEGLK_	-2.21072	-2.12863	-2.58827	-2.45201	-2.33136	Down	S	399	2	___1	0.984987	UID338	-0.967504	-1.08819	1.19314	1.05047
A3KGU7	Spna2;Sptan1	EDLKEKCTELNQAWTSLGKRADQRKAKLGDS	_CTELNQAWTS(ph)LGK_	NaN	-2.19553	-2.05523	-1.96595	-2.05523		S	1323	2	___1	0.983367	UID340	NaN	-1.12243	0.937947	0.832444
A3KGU7	Spna2;Sptan1	VPAAYVKKLDPAQSASRENLLEEQGSIALRQ	_KLDPAQSAS(ph)R_	1.65194	1.60899	2.29396	NaN	1.65194		S	1031	2	___1	0.939319	UID341	0.677531	0.82432	-1.14427	#VALUE!
A3KGU7	Spna2;Sptan1	RLKAQMIEKRSKLGESQTLQQFSRDVDEIEA	_LGES(ph)QTLQQFSR_	-1.32	NaN	-1.67947	-4.39726	-1.67947		S	1550	2	___1	0.998305	UID342	-0.588162	NaN	0.758047	1.923
A3KGU7	Spna2;Sptan1	VATFNSIKELNERWRSLQQLAEERSQLLGSA	_WRS(ph)LQQLAEER_	-0.703809	-2.17066	-0.569224	-1.3409	-1.02235		S	1217	3	___1	1	UID343	-0.325738	-1.1097	0.226509	0.552082
E9Q921	Aff1;Aff1;Aff1	GPSEGPQPGKRGCPKSPAQQEPPPRQTVGSK	_GCPKS(ph)PAQQEPPPR_	0.0562687	NaN	-0.448356	1.73001	0.0562687		S	583	3	___1	1	UID345	-0.00203565	NaN	0.168642	-0.825364
E9Q921	Aff1;Aff1;Aff1;Aff1	HTSAPGSRPVGNISHSPKMAQPRMEPSLHTK	_PVGNISHS(ph)PK_	0.80311	0.788476	0.861506	1.80578	0.832308		S	140	2	___1	0.999988	UID346	0.31603	0.404467	-0.458465	-0.859352
A5D6P2	Pard3;Pard3;Pard3;Pard3;Pard3;Pard3;Pard3;Pard3;Pard3;Pard3;Pard3;Pard3;Pard3;Pard3;Pard3	QLSQREKNNYSPGRFSPDSHCVANRSVANNA	_FS(ph)PDSHCVANR_	0.362291	0.355559	0.852824	0.854916	0.607557		S	383	2	___1	0.999992	UID347	0.128293	0.182947	-0.454308	-0.432844
A5D6P2	Pard3;Pard3;Pard3;Pard3;Pard3;Pard3;Pard3;Pard3;Pard3	GFGRQSMSEKRTKQFSDASQLDFVKTRKSKS	_QFS(ph)DASQLDFVK_	1.44473	0.986688	2.05234	-0.0153236	1.21571		S	834	2	___1	0.999999	UID348	0.589284	0.505891	-1.02859	-0.0425014
A5D6P2	Pard3;Pard3;Pard3	SDASQLDFVKTRKSKSMDLGIADETKLNTVD	_S(ph)MDLGIADETK_	-0.236838	-0.876876	NaN	-0.97564	-0.876876		S	849	2	___1	1	UID349	-0.126864	-0.447682	#VALUE!	0.388245
A5D6P2	Pard3;Pard3;Pard3;Pard3;Pard3;Pard3;Pard3;Pard3;Pard3;Pard3;Pard3;Pard3;Pard3;Pard3;Pard3	QLIVARRISRCNELRSPGSPAAPELPIETEL	_S(ph)PGSPAAPELPIETELDDR_	NaN	0.197207	-0.324114	-0.00962108	-0.00962108		S	692	2	___1	0.855051	UID350	NaN	0.101919	0.10916	-0.0450592
A5D6P2	Pard3;Pard3;Pard3;Pard3;Pard3;Pard3;Pard3;Pard3;Pard3;Pard3;Pard3;Pard3;Pard3;Pard3;Pard3	VARRISRCNELRSPGSPAAPELPIETELDDR	_SPGS(ph)PAAPELPIETELDDR_	NaN	0.362752	-0.386054	0.158145	0.158145		S	695	2	___1	0.852963	UID351	NaN	0.186627	0.138814	-0.12031
A5D6P2	Pard3;Pard3;Pard3;Pard3;Pard3;Pard3;Pard3;Pard3;Pard3;Pard3;Pard3;Pard3;Pard3;Pard3	NFSSEEPSRKNPTRWSTTAGFLKQNTAGSPK	_WS(ph)TTAGFLK_	1.67768	0.621978	0.859892	0.879366	0.869629		S	174	2	___1	0.999907	UID353	0.688494	0.319271	-0.457692	-0.443811
A5D6P6	Twist2;Twist2	SEDGSPTPGKRGKKGSPSAQSFEELQSQRIL	_KGS(ph)PSAQSFEELQSQR_	-0.328164	-0.331105	NaN	2.06608	-0.328164		S	55	2	___1	0.999113	UID354	-0.165758	-0.168415	#VALUE!	-0.976106
A6H5X4	Phf11	AQETAPPCGPVSRGDSPIIEKMEKRTCALCP	_GDS(ph)PIIEK_	-2.78898	-4.01195	NaN	-8.16223	-4.01195	Down	S	17	2	___1	1	UID356	-1.21377	-2.05188	#VALUE!	3.61176
A6H5X4	Phf11;Gm6907	DDPSMKKKRGKNKRLSSGPPAQPKTMKCSNA	_RLS(ph)SGPPAQPK_	-7.81742	-8.36305	-6.15229	-9.26898	-8.09023	Down	S	169	2	___1	0.997054	UID357	-3.35529	-4.2783	2.89945	4.10819
A6H6A5	Pgr;Pgr;Pgr	EDSRFSAPRVSLEQDSPIAPGRSPLATTVVD	_VSLEQDS(ph)PIAPGR_	4.76134	6.02544	NaN	7.01991	6.02544	Up	S	287	2	___1	0.999997	UID362	2.00177	3.08418	#VALUE!	-3.19813
A6H6A9	Rabgap1l	ILDPSNTEISTPRPSSPSRFPEEDSVLFNKL	_PSS(ph)PSRFPEEDSVLFNK_	1.14574	-0.315495	0.69161	0.495281	0.593445		S	119	3	___1	0.894507	UID364	0.461948	-0.160427	-0.377126	-0.271531
A6H8H2-2	Dennd4c;Dennd4c;Dennd4c	SAIVSKHLQPTPEPQSPTEPPAWGSSIVKVP	_HLQPTPEPQS(ph)PTEPPAWGSSIVK_	-1.2295	-1.25076	-0.85245	0.150079	-1.04097		S	1020	3	___1	0.998697	UID366	-0.54962	-0.638995	0.362105	-0.116692
A6H8H2-2	Dennd4c	SVPNSLSKRNVSLTRSHSVGGPLQNIDFSQR	_S(ph)HSVGGPLQNIDFSQR_	0.128795	-0.838114	0.228863	0.360139	0.178829		S	1684	3	___1	0.917033	UID368	0.028852	-0.427848	-0.155582	-0.210913
A6H8H2-2	Dennd4c	PNSLSKRNVSLTRSHSVGGPLQNIDFSQRPF	_SHS(ph)VGGPLQNIDFSQR_	0.245951	-0.598947	0.178766	0.177255	0.178011		S	1686	2	___1	0.999864	UID369	0.0787465	-0.305467	-0.131598	-0.128882
A6H8H2-2	Dennd4c;Dennd4c	FKPQSPYRAYKDRSTSLSALVRSSPNSSLGS	_STS(ph)LSALVR_	0.627761	0.524266	-0.386875	NaN	0.524266		S	1370	2	___1	0.999373	UID370	0.241352	0.269273	0.139207	#VALUE!
A6H8H2-2	Dennd4c;Dennd4c	LTCPKTSPPHVTRTHSFENVNCHLADSRTRM	_THS(ph)FENVNCHLADSR_	-0.301403	0.264442	-0.723599	0.476699	-0.0184805		S	1145	3	___1	0.989896	UID371	-0.154361	0.136323	0.300417	-0.263196
A6H8H2-2	Dennd4c;Dennd4c;Dennd4c	PTEPPAWGSSIVKVPSGLFDTNNRTSTGSTS	_VPS(ph)GLFDTNNR_	-1.3171	-2.20358	-3.60821	0.689481	-1.76034		S	1036	2	___1	1	UID372	-0.586926	-1.12655	1.68145	-0.358639
Q80U16	Fam65b	GSQSFSPGGPNGIIRSQSFAGFSGLQERRSR	_S(ph)QSFAGFSGLQER_	3.68866	NaN	4.15149	0.592756	3.68866		S	44	2	___1	0.942175	UID375	1.54493	NaN	-2.03357	-0.315253
Q80U16	Fam65b	QSFSPGGPNGIIRSQSFAGFSGLQERRSRCN	_SQS(ph)FAGFSGLQER_	4.02439	NaN	4.4328	0.87648	4.02439		S	46	2	___1	0.999803	UID376	1.68791	NaN	-2.16825	-0.442516
E9Q284	Coil;Coil;Coil	ETGRTKSKKKSKVTGSPAEEDEEETKKKSSK	_VTGS(ph)PAEEDEEETK_	0.65715	-0.663514	1.07889	-1.04156	-0.003182		S	174	2	___1	0.999788	UID379	0.253868	-0.338506	-0.562538	0.417812
A6X8Z5	Arhgap31	NARHAVPENKGPGLPSPTKEVDIIPQEEGGA	_GPGLPS(ph)PTK_	-1.23794	-0.262832	-1.74991	-0.925611	-1.08178		S	850	2	___1	0.995984	UID382	-0.553214	-0.13348	0.791772	0.365804
A6X8Z5	Arhgap31	GFFIPATKMHASSTGSSCDLSKEGEWGQEGM	_MHASSTGS(ph)SCDLSK_	2.95081	1.75105	1.4998	0.340506	1.62542		S	384	2	___1	0.879861	UID383	1.2307	0.897008	-0.764052	-0.202107
A6X8Z5	Arhgap31	QDLDIVAHTLTGRRNSAPVSVSAVRTSFMVK	_NS(ph)APVSVSAVR_	-2.15547	-1.9129	-2.35432	0.76429	-2.03418		S	1163	2	___1	1	UID385	-0.943971	-0.97781	1.08114	-0.392194
A6X8Z5	Arhgap31	GQRLSVEKATIRPAKSMDSLCSVPVEGKENK	_S(ph)MDSLCSVPVEGK_	0.105472	-0.0526399	-0.147498	-0.526432	-0.100069		S	343	2	___1	0.999994	UID386	0.018919	-0.0259259	0.0246034	0.186754
A6ZI47	Aldoart2;Aldoa;Aldoa;Aldoa;Aldoa;Aldoa	HRIVAPGKGILAADESTGSIAKRLQSIGTEN;RRIVAPGKGILAADESTGSIAKRLQSIGTEN	_GILAADES(ph)TGSIAK_	-0.0834191	NaN	-0.39671	-1.53107	-0.39671		S	90	2	___1	0.977732	UID389	-0.061526	NaN	0.143916	0.637378
A6ZI47	Aldoart2;Aldoa;Aldoa;Aldoa;Aldoa;Aldoa	VAPGKGILAADESTGSIAKRLQSIGTENTEE	_GILAADESTGS(ph)IAK_	0.850935	-1.41515	-1.60661	-1.67739	-1.51088		S	93	2	___1	0.999849	UID390	0.336398	-0.72311	0.723165	0.703012
A6ZI47	Aldoart2;Aldoa;Aldoa;Aldoa;Aldoart1;Aldoart1;Aldoa;Aldoa	LAADESTGSIAKRLQSIGTENTEENRRFYRQ	_LQS(ph)IGTENTEENR_	-0.221669	-1.40892	NaN	-2.45295	-1.40892		S	100	2	___1	1	UID391	-0.120404	-0.719923	#VALUE!	1.05088
A8C756	Thada	LLIRQDALPAVLSASSPQQLTRGAGETSAVL	_QDALPAVLSASS(ph)PQQLTR_	-2.38707	-1.44016	-2.7252	-2.26532	-2.3262	Down	S	861	2	___1	0.973566	UID392	-1.04261	-0.735908	1.2587	0.966726
P70271	Pdlim4;Pdlim4;Pdlim4	AQAHRIHIDPESQDCSPATSRRSSVSGISLE	_IHIDPESQDCS(ph)PATSR_	-4.12217	NaN	-5.14301	-7.49257	-5.14301	Down	S	111	3	___1	0.99959	UID393	-1.78155	NaN	2.41625	3.31139
P70271	Pdlim4;Pdlim4;Pdlim4	DPESQDCSPATSRRSSVSGISLEDNRSGLGS	_RSS(ph)VSGISLEDNR_	-6.72196	-6.38126	-6.33948	-8.27545	-6.55161	Down	S	119	2	___1	0.999614	UID395	-2.88875	-3.26424	2.98907	3.66255
Q9EST3	Eif4enif1;Eif4enif1	GSLEATASLLSQRAPSPPMSQVFRTQAASAD	_APS(ph)PPMSQVFR_	0.67839	0.408458	0.857782	0.447151	0.562771		S	563	2	___1	1	UID397	0.262914	0.210015	-0.456682	-0.249942
Q9EST3	Eif4enif1;Eif4enif1	HMHSQLEHRTSQRSSSPVGLAKWFGSDVLQQ	_SSS(ph)PVGLAK_	1.55897	0.939032	1.436	0.958332	1.19717		S	949	2	___1	0.999996	UID398	0.637935	0.481506	-0.733507	-0.479231
Q9EST3	Eif4enif1;Eif4enif1;Eif4enif1	GVWDPEKWHASLYPASGRSSPVESLKKESES	_WHASLYPAS(ph)GR_	1.24916	0.544081	1.90959	0.36972	0.896621		S	73	2	___1	1	UID399	0.505992	0.279412	-0.960244	-0.215211
Q5F293	Zbtb4;Zbtb4	TYTAKPVGGLSGSGGSPTGTGRGSSQLQAPP	_PVGGLSGSGGS(ph)PTGTGR_	NaN	5.59683	-4.83796	1.26472	1.26472		S	559	2	___1	0.969458	UID402	NaN	2.86487	2.2702	-0.616658
B0QZN5	Vamp2;Vamp2;Vamp3	DRADALQAGASQFETSAAKLKRKYWWKNCKM;DRADALQAGASQFETSAAKLKRKYWWKNLKM	_ADALQAGASQFETS(ph)AAK_	4.2373	3.31189	5.67237	1.32465	3.7746	Up	S	67	2	___1	0.998207	UID404	1.77859	1.69568	-2.7617	-0.643541
Q9CQJ7	Pttg1;Pttg1	NEERGLEKLLHLGPPSPLKTPFLSWESDPLY	_LLHLGPPS(ph)PLK_	0.222777	-0.13445	0.0331906	0.18733	0.11026		S	162	3	___1	1	UID405	0.0688772	-0.0677876	-0.0619025	-0.133401
Q91VY5	Kdm4b;Kdm4b	RRRSQPKKSKPEESRSPGEATAGVSTLDEAR	_S(ph)PGEATAGVSTLDEAR_	1	0.57044	1.76697	2.02271	1.38348		S	418	2	___1	1	UID408	0.399882	0.2929	-0.891964	-0.956655
Q3UH70	Brd4;Brd4;Brd4;Brd4;Brd4	FAKMPDEPEEPVVTVSSPAVPPPTKVVAPPS	_MPDEPEEPVVTVS(ph)SPAVPPPTK_	NaN	1.81126	0.166444	1.8278	1.81126		S	471	2	___1	0.979105	UID409	NaN	0.927821	-0.125699	-0.869227
B1APX2	5031439G07Rik	STPPTPERNNRPAFFSPSLKRKVPRNRIAEM	_NNRPAFFS(ph)PSLK_	3.61875	2.5392	3.8441	4.83493	3.73142	Up	S	347	2	___1	0.999999	UID411	1.51516	1.3003	-1.88641	-2.21806
B1APX2	5031439G07Rik	PPTPERNNRPAFFSPSLKRKVPRNRIAEMKK	_NNRPAFFSPS(ph)LK_	3.87324	2.95366	0.444792	4.90405	3.41345	Up	S	349	3	___1	0.997956	UID412	1.62354	1.51238	-0.25896	-2.24907
B1APX2	5031439G07Rik	RKVPRNRIAEMKKSHSANDSEEFFREDDSGA	_SHS(ph)ANDSEEFFR_	2.03239	1.43105	1.33849	3.09147	1.73172		S	367	2	___1	0.999981	UID413	0.839557	0.733268	-0.686824	-1.43604
B1APX2	5031439G07Rik	LRSRSLSGTGRSLVGSWLKLNRADGNFLLYA	_SLVGS(ph)WLK_	2.55694	1.35228	2.00271	3.45171	2.27982	Up	S	405	2	___1	1	UID414	1.06295	0.692963	-1.00483	-1.59763
B1AQJ2	Usp36;Usp36	QRPGSWASRDTIFSTSPKLLARAITNGHRLK	_DTIFSTS(ph)PK_	-0.7785	-0.704813	0.193227	-2.43863	-0.741656		S	578	2	___1	0.999017	UID417	-0.357548	-0.359638	-0.138521	1.04446
B1AQY2	Arhgap23;Arhgap23;Arhgap23;Arhgap23	SPSSPTFTFALSRHYSQDCSSIKAGRRSSYL	_HYS(ph)QDCSSIK_	3.45945	2.33483	2.49829	1.7412	2.41656	Up	S	599	2	___1	0.999843	UID419	1.44731	1.19573	-1.24209	-0.830383
B1AQY2	Arhgap23;Arhgap23;Arhgap23;Arhgap23	AGRRSSYLLAITTERSKSCDDGLNTFRDEGR	_S(ph)KSCDDGLNTFR_	2.85611	2.30364	NaN	2.55075	2.55075	Up	S	622	2	___1	0.919183	UID422	1.19036	1.17977	#VALUE!	-1.1935
B1AQY2	Arhgap23;Arhgap23;Arhgap23;Arhgap23	RRSSYLLAITTERSKSCDDGLNTFRDEGRVL	_SKS(ph)CDDGLNTFR_	3.26174	2.26277	3.13606	2.20791	2.69942	Up	S	624	2	___1	0.999084	UID423	1.36312	1.15885	-1.54743	-1.03973
B1AQZ2	Kif3a;Kif3a;Kif3a;Kif3a;Kif3a	TSKGKARPKMGRRKRSAKPETVIDSLLQ___	_S(ph)AKPETVIDSLLQ_	-7.54553	-5.4305	-7.16132	-3.37603	-6.29591	Down	S	713	2	___1	0.999998	UID424	-3.2395	-2.77774	3.38253	1.46493
B1AR17	Chd3;Chd3;Chd3	KYKKKKKELQGDGPPSSPTNDPTVKYETQPR	_ELQGDGPPS(ph)SPTNDPTVK_	-0.131591	-0.605959	NaN	-1.0186	-0.605959		S	764	2	___1	0.881797	UID426	-0.0820413	-0.309056	#VALUE!	0.407516
B1AR17	Chd3;Chd3;Chd3	YKKKKKELQGDGPPSSPTNDPTVKYETQPRF	_ELQGDGPPSS(ph)PTNDPTVK_	-0.252409	-0.361849	-0.087628	-0.963576	-0.307129		S	765	2	___1	0.974645	UID427	-0.133495	-0.184146	-0.00405961	0.382833
B1AR74	Bcas3;Bcas3;Bcas3;Bcas3;Bcas3;Bcas3;Bcas3	SEEGLRERLADAMAESPSRDVVGSGTDTALD	_LADAM(ox)AES(ph)PSR_	1.85719	1.2601	2.12382	-0.0992844	1.55864		S	869	2	___1	0.999994	UID435	0.764941	0.645794	-1.06281	-0.00484109
B1AR74	Bcas3;Bcas3;Bcas3;Bcas3;Bcas3;Bcas3;Bcas3	EGLRERLADAMAESPSRDVVGSGTDTALDVA	_LADAM(ox)AESPS(ph)R_	0.991518	1.36846	2.31488	0.175708	1.17999		S	871	2	___1	0.974024	UID436	0.396269	0.701239	-1.15428	-0.128188
E9PVY8	Macf1;Macf1;Macf1;Macf1;Macf1;Macf1;Macf1	QAESNKAFLAELEQNSPKIQKVKEALAGLLK	_AFLAELEQNS(ph)PK_	0.642345	0.36696	0.601622	0.623679	0.61265		S	4481	2	___1	1	UID438	0.247563	0.188781	-0.334043	-0.329123
E9PVY8	Macf1;Macf1;Macf1;Macf1;Macf1;Macf1;Macf1	GSSPEALNSLLKRQGSFSEDVISHKGDLRFV	_QGS(ph)FSEDVISHK_	2.73291	2.00124	1.45006	2.28135	2.1413	Up	S	3887	2	___1	0.999256	UID442	1.1379	1.02503	-0.740239	-1.07266
E9PVY8	Macf1;Macf1;Macf1;Macf1;Macf1;Macf1;Macf1;Macf1	THAPFMEKSRSGSRKSLNQPTPPPMPILSQS	_S(ph)LNQPTPPPMPILSQSEAK_	-1.52694	0.89261	-1.78487	0.604463	-0.461239		S	6924	2	___1	1	UID444	-0.676296	0.457752	0.808509	-0.320504
Q07243	Mtf1;Mtf1	___________MGEHSPDDNIIFFKGEEDDL	_(ac)GEHS(ph)PDDNIIFFK_	-2.02099	-1.40465	-2.42623	-0.678485	-1.71282		S	5	2	___1	1	UID446	-0.8867	-0.717738	1.11557	0.254957
Q9D032	Ssbp3;Ssbp3	NGSLGSGDIDGLPKNSPNNISGISNPPGTPR	_NS(ph)PNNISGISNPPGT(ph)PR_	1.01614	1.51707	1.6377	1.10633	1.3117		S	347	2	___1	1	UID447	0.406754	0.777283	-0.830075	-0.545613
Q66T02	Plekhg5;Plekhg5	PVQLLPRPPRLLKSKSEASLLQLLSGTPAAR	_S(ph)EASLLQLLSGTPAAR_	NaN	1.77862	2.28299	0.243129	1.77862		S	938	2	___1	0.987956	UID449	NaN	0.911116	-1.13901	-0.158429
Q66T02	Plekhg5;Plekhg5	LLPRPPRLLKSKSEASLLQLLSGTPAARGVP	_SKSEAS(ph)LLQLLSGTPAAR_	NaN	1.22675	2.59388	0.343615	1.22675		S	941	3	___1	0.988654	UID450	NaN	0.628727	-1.28785	-0.203502
B1ASA5	Zfp362	HMSKHTVVEHLVSHHSPQRTESPGIPVRISL	_HTVVEHLVSHHS(ph)PQR_	5.83684	4.59038	6.61201	NaN	5.83684	Up	S	402	4	___1	0.99818	UID453	2.4598	2.34987	-3.21156	#VALUE!
E9Q1Q1	Mast2;Mast2;Mast2;Mast2;Mast2	QDMVTGLSPLLFRKLSNPDIFAPTGKVKLQR	_KLS(ph)NPDIFAPTGK_	0.660558	0.177434	0.827129	1.62935	0.743843		S	75	2	___1	1	UID454	0.25532	0.0918014	-0.442007	-0.780215
E9Q1Q1	Mast2;Mast2;Mast2;Mast2;Mast2	AISDLAVRRARHRLLSGDSIEKRTTRPVNKV	_LLS(ph)GDSIEK_	1.98627	0.811811	2.11533	1.8582	1.92224		S	1037	2	___1	0.999998	UID455	0.819913	0.416407	-1.05874	-0.882864
E9Q1Q1	Mast2;Mast2;Mast2;Mast2;Mast2;Mast2;Mast2	HGHTGNSPLDSPRNFSPNAPAHFSFVPARSH	_NFS(ph)PNAPAHFSFVPAR_	0.332093	-0.0751199	0.963029	1.57323	0.647561		S	210	3	___1	1	UID456	0.115433	-0.0374288	-0.50707	-0.75504
E9Q1Q1	Mast2;Mast2;Mast2;Mast2;Mast2	EASNLVRMRNQSLGQSAPSLTAGLKELSLPR	_NQSLGQS(ph)APSLTAGLK_	2.06104	1.58115	1.50733	1.37243	1.54424		S	149	2	___1	1	UID457	0.851759	0.810073	-0.767659	-0.664974
E9Q1Q1	Mast2;Mast2;Mast2;Mast2;Mast2	GLAGLKGRDRSWVIGSPEILRKRLSVSESSH	_SWVIGS(ph)PEILR_	3.38129	2.23217	3.48818	3.13713	3.25921	Up	S	908	2	___1	1	UID460	1.41403	1.1432	-1.71601	-1.45652
K4DI59	Lig3;Lig3;Lig3;Lig3;Lig3	KAAVQAKLTTTGQVTSPVKGASFITSTNPRK	_LTTTGQVTS(ph)PVK_	-0.95361	-2.37149	0.696702	2.05313	-0.128454		S	211	2	___1	0.999545	UID462	-0.432124	-1.21247	-0.379564	-0.9703
K4DI59	Lig3;Lig3;Lig3;Lig3;Lig3	GFSAAKPNNSEQAPSSPAPGTSLSASKCDPK	_PNNSEQAPSS(ph)PAPGTSLSASK_	NaN	0.00140829	0.716959	-0.651961	0.00140829		S	244	2	___1	0.991875	UID464	NaN	0.00173014	-0.389262	0.24306
Q8K296	Mtmr3;Mtmr3;Mtmr3	TSPDEPPLSRLPKTRSFDNLTTTCENMVPLA	_S(ph)FDNLTTTCENMVPLASR_	1.80738	1.20018	2.17396	1.75886	1.78312		S	613	2	___1	0.999852	UID466	0.74373	0.615134	-1.08681	-0.838306
B1AU75	Nasp;Nasp	PQTSAERLTETKDGSSVEEVKAELVPEQEEA	_DGSS(ph)VEEVK_	-3.323	-1.44693	NaN	-3.45532	-3.323		S	396	2	___1	0.996415	UID469	-1.4412	-0.739372	#VALUE!	1.5005
Q9QY36	Naa10;Naa10;Naa10	SGEACREEKGLAAEDSGGDSKDLSEVSETTE	_GLAAEDS(ph)GGDS(ph)K_	-1.89563	-3.00631	-2.81234	-3.50932	-2.90932	Down	S	205	2	___1	1	UID471	-0.83331	-1.5373	1.30042	1.52472
B1AV39	Phf16;Phf16	QLSSPGSSSPGHSKRSPQMPEEPLDMNVKIY	_S(ph)PQM(ox)PEEPLDMNVK_	-1.30252	-0.879223	-1.53681	-1.42961	-1.36606		S	579	2	___1	1	UID473	-0.58072	-0.448883	0.689746	0.591871
Q8BR70	Yipf6;Yipf6;Yipf6	_________MAEAEDSPGEQEAAASKPLFAG	_(ac)AEAEDS(ph)PGEQEAAASK_	-0.956856	-1.34219	-0.572056	-0.351651	-0.764456		S	7	2	___1	1	UID474	-0.433506	-0.685779	0.227864	0.108357
B1AWL2	Zfp462	AKANRKLASDFPLDLSPVKKRTRIDEIASNL	_LASDFPLDLS(ph)PVK_	0.0907287	0.253132	-0.836936	-0.0387901	0.0259693		S	681	2	___1	1	UID476	0.0126402	0.130536	0.354678	-0.0319756
B1AWL2	Zfp462	SKFSSSMSYPQMKPKSPHNSGLVNLTERSRY	_S(ph)PHNSGLVNLTER_	4.0373	-2.0443	-1.35647	0.309758	-0.523356		S	351	2	___1	0.999823	UID477	1.69341	-1.04504	0.603407	-0.188315
B1AXD8	Akirin2	PAAATAAAAASAAAASPQKYLRMEPSPFGDV	_CAPLSAPASAAASPAAATAAAAASAAAAS(ph)PQK_	0.384841	-0.878953	1.62594	-0.21886	0.0829905		S	55	3	___1	1	UID478	0.137897	-0.448745	-0.824443	0.0487942
B1AXD8	Akirin2	TLKRTLDFDPLLSPASPKRRRCAPLSAPASA	_TLDFDPLLSPAS(ph)PK_	0.632629	0.031102	1.89941	0.819939	0.726284		S	21	2	___1	1	UID479	0.243425	0.0169242	-0.955368	-0.417155
B1AXH8	Runx1t1;Runx1t1;Runx1t1	LKKGGSSSSSHSRQQSPVNPDPVALDAHREF	_QQS(ph)PVNPDPVALDAHR_	2.08908	1.3695	3.67239	2.94658	2.51783	Up	S	417	2	___1	1	UID481	0.863701	0.701771	-1.8042	-1.37105
Q3U3N6	2410002I01Rik;2410002I01Rik	VLLLCRQQLQELGAGSPGPVTNKATKILRHF	_QQLQELGAGS(ph)PGPVTNK_	0.508478	-0.102802	1.2376	1.3557	0.873039		S	400	3	___1	0.999946	UID484	0.190552	-0.0515936	-0.638524	-0.657468
B1AY10	Nfx1	SAVHQHSYASGSKPKSPQGFFQSSNKSLKNH	_S(ph)PQGFFQSSNK_	-1.50821	-0.594491	-2.38662	-0.36505	-1.05135		S	81	2	___1	1	UID485	-0.668318	-0.303187	1.0966	0.114367
E9PV45	Usp24;Usp24	WNAYMLFYQRVSDQNSPVLPKKSRVSVVRQE	_VSDQNS(ph)PVLPK_	0.433442	-0.0551384	0.349182	0.220308	0.284745		S	2045	2	___1	1	UID486	0.158596	-0.0272044	-0.213186	-0.148193
Q8C5N3	Cwc22;Cwc22	EDRHGEPKKRRERRDSFSENEKQRSRNQDSD	_RDS(ph)FS(ph)ENEK_	-0.552608	-0.527898	-0.865551	-0.822126	-0.687367		S	829	2	___1	1	UID490	-0.261345	-0.269112	0.368377	0.319387
Q8C5N3	Cwc22;Cwc22;Cwc22;Cwc22	KSPSPDRSPARGGGQSSPQEEPTWKKKKDEL	_GGGQS(ph)SPQEEPTWK_	-0.902532	-2.35086	-0.82513	-1.49216	-1.19735		S	105	2	___1	0.905243	UID491	-0.410371	-1.20191	0.349026	0.619929
Q8C5N3	Cwc22;Cwc22;Cwc22;Cwc22	SPSPDRSPARGGGQSSPQEEPTWKKKKDELD	_GGGQSS(ph)PQEEPTWK_	-0.936604	-1.21702	-0.79756	-1.15161	-1.04411		S	106	2	___1	0.999964	UID492	-0.424881	-0.621733	0.335826	0.467175
Q3UMF0	Cobll1;Cobll1;Cobll1	ISKADDDIIQKPAETSPPPVAPKPMTLRAET	_ADDDIIQKPAETS(ph)PPPVAPK_	0.535089	0.646502	1.33854	0.125448	0.590796		S	1028	3	___1	0.99356	UID493	0.201885	0.33182	-0.686847	-0.105644
Q3UMF0	Cobll1;Cobll1;Cobll1	LPLVFPKPMTLRAETSPPPVAAKPVALPGSQ	_AETS(ph)PPPVAAK_	0.433746	0.212142	1.33946	1.07572	0.754733		S	1092	2	___1	0.99978	UID494	0.158725	0.109561	-0.687288	-0.531886
Q3UMF0	Cobll1;Cobll1;Cobll1	PPPVAPKPMTLRAETSPPPVFPKPMTLPAET	_AETS(ph)PPPVFPK_	0.914459	1.71493	1.10216	-0.225694	1.00831		S	1044	2	___1	0.996788	UID495	0.363451	0.878529	-0.573682	0.0518593
Q3UMF0	Cobll1;Cobll1;Cobll1;Cobll1	FSFFQRSKKKREQTASAPATPLVSKHRPSFT	_EQTAS(ph)APATPLVSK_	4.37516	-0.605191	4.32217	-1.2193	1.85849		S	300	2	___1	0.99944	UID498	1.8373	-0.308662	-2.11528	0.497536
Q3UMF0	Cobll1;Cobll1;Cobll1	PPPVFPKPMTLPAETSPPPVFPKPMTLPAET	_PMTLPAETS(ph)PPPVFPK_	0.386995	0.956546	1.24032	-0.0110808	0.671771		S	1060	3	___1	0.999514	UID500	0.138814	0.490467	-0.639827	-0.0444045
Q3UMF0	Cobll1;Cobll1;Cobll1	VLTPADGPSFTLKRQSSLTFQSSDPEHVRQS	_QS(ph)SLTFQSSDPEHVR_	-0.368916	-1.49664	-0.0647562	-2.89562	-0.932778		S	1214	3	___1	0.899222	UID501	-0.183114	-0.764812	-0.0150097	1.24945
Q3UMF0	Cobll1;Cobll1;Cobll1	LTPADGPSFTLKRQSSLTFQSSDPEHVRQSL	_QSS(ph)LTFQSSDPEHVR_	-0.433918	-1.51457	0.144595	-3.18027	-0.974244		S	1215	3	___1	0.98269	UID502	-0.210797	-0.773985	-0.115238	1.37712
Q3UMF0	Cobll1;Cobll1;Cobll1	PKPSSGTERHLHRTLSSPTGTETNPPKAPRV	_TLS(ph)SPTGTETNPPK_	2.94706	0.647845	2.82836	-1.32705	1.7381		S	896	2	___1	0.999393	UID503	1.2291	0.332507	-1.40011	0.54587
Q8BKX1	Baiap2;Baiap2	NSYATTENKTLPRSSSMAAGLERNGRMRVKA	_SSS(ph)MAAGLER_	2.35121	1.20607	NaN	0.152521	1.20607		S	367	2	___1	0.9961	UID505	0.975337	0.618145	#VALUE!	-0.117787
B1AZI6	Thoc2;Thoc2;Thoc2	EPDREQKRRKIDSHPSPSHSSTVKDSLIDLK	_IDSHPS(ph)PSHSSTVK_	-0.180966	-1.05726	-0.161979	-1.18908	-0.619113		S	1417	3	___1	0.998825	UID508	-0.103069	-0.539981	0.0315363	0.483983
B1B0E8	Zrsr2	SRERRSSPSRRRKDHSPGPWSQSRRSHRSRS	_DHS(ph)PGPWSQSR_	-0.382288	-0.810374	-0.947529	-0.350159	-0.596331		S	434	2	___1	1	UID511	-0.188808	-0.413653	0.407625	0.107688
G5E8P7	Phactr1;Phactr1;Phactr1;Phactr4	LELRQQIGTKLTRRLSQRPTAEELEQRNILK;NEIRHQIGNTLIRRLSQRPTAEELEQRNILQ	_RLS(ph)QRPTAEELEQR_	-2.69942	NaN	-2.96547	-1.08912	-2.69942		S	592	3	___1	0.999887	UID512	-1.17563	NaN	1.37373	0.439144
E9PVU7	Pde4d;Pde4d;Pde4d;Pde4d;Pde4d;Pde4d;Pde4b;Pde4b;Pde4b;Pde4b;Pde4b;Pde4b	FVHSQRRESFLYRSDSDYDLSPKSMSRNSSI;PGHSQRRESFLYRSDSDYDLSPKAMSRNSSL	_SDS(ph)DYDLSPK_	2.40319	0.680127	0.961916	-0.777221	0.821022		S	192	2	___1	0.999971	UID513	0.997473	0.349026	-0.506537	0.299245
B2KF50	Uhrf1bp1	DGSGENLAASQERLPSDGELPDPGPCAQQPV	_LPS(ph)DGELPDPGPCAQQPVGK_	-0.116599	-0.177598	0.388882	0.160873	0.022137		S	942	2	___1	1	UID514	-0.0756568	-0.089866	-0.232193	-0.121534
B2KF52	D17Wsu92e;D17Wsu92e	TQPHRKVEGNFNPFASPQKNRQSDENNLTDP	_VEGNFNPFAS(ph)PQK_	0.75598	2.07966	1.67251	0.281807	1.21425		S	215	2	___1	1	UID515	0.295958	1.06516	-0.846739	-0.175778
B2M1R6	Hnrnpk;Hnrnpk;Hnrnpk;Hnrnpk;Hnrnpk	GGRPMPPSRRDYDDMSPRRGPPPPPPGRGGR	_RDYDDM(ox)S(ph)PR_	0.778805	1.38936	0.710257	0.442793	0.744531		S	284	2	___1	1	UID516	0.305679	0.711935	-0.386054	-0.247988
B2M1R6	Hnrnpk;Hnrnpk;Gm7964;Hnrnpk;Hnrnpk;Gm7964;Hnrnpk;Hnrnpk	RVVECIKIILDLISESPIKGRAQPYDPNFYD	_IILDLISES(ph)PIK_	-1.43167	-2.28489	NaN	-2.23606	-2.23606		S	216	2	___1	0.999557	UID517	-0.635719	-1.16816	#VALUE!	0.953601
G5E8D8	Mlxip;Mlxip;Mlxip	_______MAADVFMCSPRRPRSRGRSVLLKP	_(ac)AADVFMCS(ph)PR_	3.20477	1.63641	3.51393	1.4642	2.42059		S	9	2	___1	1	UID519	1.33885	0.838347	-1.72834	-0.706135
F8VQH0	Abl2;Abl2;Abl2	ASSGSPALPRKQRDKSPSSLLEDAKETCFTR	_DKS(ph)PSSLLEDAK_	-1.78395	-1.93806	-1.92981	-1.38772	-1.85688		S	632	2	___1	1	UID520	-0.785751	-0.990682	0.877901	0.573084
F8VQH0	Abl2;Abl2;Abl2	SGSPALPRKQRDKSPSSLLEDAKETCFTRDR	_DKSPS(ph)SLLEDAK_	-1.79542	-2.32304	NaN	-1.2809	-1.79542		S	634	3	___1	0.819839	UID521	-0.790634	-1.18767	#VALUE!	0.525167
F8VQH0	Abl2;Abl2;Abl2	AKETCFTRDRKGGFFSSFMKKRNAPTPPKRS	_GGFFS(ph)SFMK_	-1.30481	-2.6623	-2.00559	-2.57391	-2.28975	Down	S	655	2	___1	0.985098	UID522	-0.581691	-1.36127	0.914182	1.10514
F8VQH0	Abl2;Abl2;Abl2	KETCFTRDRKGGFFSSFMKKRNAPTPPKRSS	_GGFFSS(ph)FMK_	-1.2078	-2.73947	-1.4425	-2.47445	-1.95847		S	656	2	___1	0.999176	UID523	-0.54038	-1.40076	0.644595	1.06053
F8VQH0	Abl2;Abl2;Abl2	AVLPTTHNHKVPVLISPTLKHTPADVQLIGT	_VPVLIS(ph)PTLK_	-2.90788	-2.03379	-3.01175	-1.39053	-2.47084	Down	S	936	2	___1	0.999879	UID524	-1.26441	-1.03967	1.39589	0.574344
E9PWR4	Dip2c;Dip2c;Dip2c	YHRRRSSGSRDERYRSDVHTEAVQAALAKHK	_YRS(ph)DVHTEAVQAALAK_	4.13007	-1.16996	3.4507	-0.413413	1.51864		S	89	3	___1	0.901506	UID525	1.73292	-0.597649	-1.69806	0.13606
B2RQC2	Usp42	EKAQDSAMAEVVERLSPAPSVLTGDGCEQKL	_LS(ph)PAPSVLTGDGCEQK_	-0.603869	-1.26299	-0.762015	-1.49844	-1.0125		S	858	2	___1	0.999959	UID526	-0.283176	-0.645255	0.318809	0.622743
B2RQC2	Usp42	TLENNDGRLEKKVHKSLEKDTLEEPRVKKHK	_S(ph)LEKDTLEEPR_	-1.93484	-3.62172	NaN	-2.12161	-2.12161		S	1189	2	___1	1	UID529	-0.850012	-1.8522	#VALUE!	0.902267
B2RQC6	Cad;Cad;Cad;Cad	LPDGRFHLPPRIHRASDPGLPAEEPKEKPPR	_IHRAS(ph)DPGLPAEEPK_	0.353602	-0.754263	0.844742	-2.68832	-0.20033		S	1859	2	___1	1	UID530	0.124593	-0.384942	-0.450439	1.15646
B2RQC6	Cad;Cad;Cad;Cad	LVINLSMRGAGGRRLSSFVTKGYRTRRLAAD	_RLS(ph)SFVTK_	-3.78923	-1.65295	-3.90978	-0.142718	-2.72109		S	1406	2	___1	0.99955	UID531	-1.63976	-0.844795	1.82583	0.014641
B2RQC6	Cad;Cad;Cad;Cad	MAMALHRQQCRVLGTSPEAIDSAENRFKFSR	_VLGTS(ph)PEAIDSAENR_	-1.34853	-2.08892	-2.31532	0.387167	-1.71873		S	1038	2	___1	0.997712	UID532	-0.600315	-1.06788	1.06247	-0.223037
B2RQG2	Phf3	LELKNTVDIVDKPENSPQRNELETLGYGEDT	_NTVDIVDKPENS(ph)PQR_	-0.736702	-1.73542	-0.773348	-1.18287	-0.978109		S	377	3	___1	1	UID534	-0.339747	-0.886993	0.324234	0.481196
B2RQS1	Strn3;Strn3	SVEAKNLEQILNGGESPKQKGQEIKRPPGDV	_NLEQILNGGES(ph)PKQK_	-1.09439	-0.82321	-1.59105	-1.05261	-1.0735		S	229	3	___1	1	UID535	-0.492078	-0.420221	0.715718	0.422771
Q6AW69	Cgnl1;Cgnl1;Cgnl1	SRAAGSAQGSNQAPNSPSEGNSLLDQKNKLI	_AAGSAQGSNQAPNS(ph)PSEGNSLLDQK_	2.24516	0.776736	-1.2909	2.17921	1.47797		S	602	3	___1	0.998674	UID541	0.93017	0.39846	0.572016	-1.02685
Q6AW69	Cgnl1;Cgnl1;Cgnl1	NVQRCAKEGVGEETLSPRRKSPTAPSPQAYS	_EGVGEETLS(ph)PR_	0.0776069	0.406751	0.119404	1.8764	0.263077		S	252	2	___1	0.999973	UID542	0.00705191	0.209141	-0.103178	-0.891027
Q6AW69	Cgnl1;Cgnl1;Cgnl1	TKKNRPDVLPFRRQDSAGPILDGARSRRSSS	_RQDS(ph)AGPILDGAR_	0.391607	0.952127	-0.0652127	2.48046	0.671867		S	284	3	___1	1	UID543	0.140779	0.488206	-0.0147911	-1.16198
Q6AW69	Cgnl1;Cgnl1;Cgnl1	AKEGVGEETLSPRRKSPTAPSPQAYSETKKN	_RKS(ph)PTAPSPQAYSETK_	NaN	0.370175	-0.664293	2.28771	0.370175		S	257	3	___1	0.97436	UID544	NaN	0.190425	0.272023	-1.07552
Q6AW69	Cgnl1;Cgnl1;Cgnl1	TLQRRLEESEGELRKSLEELFQVKMEREQHQ	_S(ph)LEELFQVK_	0.676978	1.06713	1.36744	2.23994	1.21728		S	679	2	___1	1	UID545	0.262313	0.547055	-0.700685	-1.05409
Q6AW69	Cgnl1;Cgnl1;Cgnl1	GNTEYLTEFSRNLGKSSEHLLRPSQVFPQRS	_S(ph)SEHLLRPSQVFPQR_	1.03931	2.44135	0.806485	3.34742	1.74033		S	415	3	___1	0.879152	UID546	0.416624	1.25023	-0.432124	-1.55085
B2RT41	Zfc3h1	MAAAADPSTPASSGLSPKEEGELEDGEISDD	_(ac)AAAADPSTPASSGLS(ph)PK_	-1.83918	-2.47314	-0.749911	-0.548117	-1.29455		S	16	2	___1	0.994062	UID549	-0.809271	-1.26448	0.313014	0.196481
B2RT41	Zfc3h1	EQDRLGPNKMMRLDNSPISSPRKHSAELIAM	_LDNS(ph)PISSPR_	NaN	-2.45733	-0.782961	-1.91204	-1.91204		S	952	2	___1	0.999883	UID550	NaN	-1.25639	0.328836	0.808261
B2RT41	Zfc3h1	SQGLEDKEQNLTRRLSASDIVSEKKLGEEEE	_RLS(ph)ASDIVSEK_	-2.21934	-1.70777	-1.98795	-0.404033	-1.84786		S	356	2	___1	0.999848	UID551	-0.971176	-0.872842	0.905736	0.131853
B2RT41	Zfc3h1	VDDEVLSGASRERRRSFLESNSFTKPNLKHT	_S(ph)FLESNSFTKPNLK_	-3.15871	-2.86615	-3.0706	-1.09883	-2.96837	Down	S	1049	2	___1	1	UID553	-1.37124	-1.46558	1.42406	0.443501
B2RUJ8	Arhgap12	DRRLQEPIVLTKWRHSTIVLDSNDKGQEKYG	_WRHS(ph)TIVLDSNDK_	-0.831606	-1.65022	-1.69387	-1.22499	-1.43761		S	420	3	___1	0.971534	UID557	-0.380164	-0.843396	0.764941	0.500088
B2RW11	Ankrd34a	PQPGGRAPSLPAPPPSGAPGSPRTKRKLVRR	_APSLPAPPPS(ph)GAPGSPR_	-1.01686	NaN	-0.159619	-0.430636	-0.430636		S	455	2	___1	0.793154	UID559	-0.45906	NaN	0.0304066	0.143785
B2RW11	Ankrd34a	RAPSLPAPPPSGAPGSPRTKRKLVRRHSMQT	_APSLPAPPPSGAPGS(ph)PR_	-1.52218	-0.556549	-0.643759	-0.404327	-0.600154		S	460	2	___1	0.999995	UID560	-0.674268	-0.283773	0.262193	0.131985
B2RWS6	Ep300;Ep300;Crebbp;Crebbp	PAPVQSPRPQSQPPHSSPSPRIQPQPSPHHV;PQPVPSPRPQSQPPHSSPSPRMQPQPSPHHV	_PQSQPPHS(ph)SPSPR_	-0.425616	0.368691	0.0568113	NaN	0.0568113		S	2325	2	___1	0.982559	UID563	-0.207261	0.189666	-0.0732111	#VALUE!
B2RWS6	Ep300;Ep300;Crebbp;Crebbp	APVQSPRPQSQPPHSSPSPRIQPQPSPHHVS;QPVPSPRPQSQPPHSSPSPRMQPQPSPHHVS	_PQSQPPHSS(ph)PSPR_	-0.793987	-0.458463	0.205458	0.360734	-0.126503		S	2326	2	___1	0.983669	UID564	-0.364144	-0.233583	-0.144377	-0.211181
B2RWS6	Ep300;Ep300;Crebbp;Crebbp	VPSPRPQSQPPHSSPSPRMQPQPSPHHVSPQ;VQSPRPQSQPPHSSPSPRIQPQPSPHHVSPQ	_PQSQPPHSSPS(ph)PR_	0.191304	-0.561634	0.701174	NaN	0.191304		S	2328	2	___1	0.998945	UID565	0.0554733	-0.286375	-0.381705	#VALUE!
B2RXC2	Itpkb	PSGSETPQPSGRAALSPGSVFSPGRGASFLF	_AALS(ph)PGSVFSPGR_	0.961268	0.357297	1.55225	-1.1877	0.659282		S	42	2	___1	0.999999	UID566	0.383386	0.183836	-0.789162	0.483364
B2RXC2	Itpkb	PSKDKEGVAPLLGPASPTRLGTQSPSTSVRM	_DKEGVAPLLGPAS(ph)PTR_	1.94009	0.855622	2.05117	-0.452397	1.39786		S	247	3	___1	0.820046	UID567	0.800248	0.438825	-1.02803	0.153546
B2RXC2	Itpkb	FRSSSQPPERVLAPCSPSEERRTKSWGEQCT	_VLAPCS(ph)PSEER_	2.12224	1.11743	NaN	-0.528409	1.11743		S	200	2	___1	0.977496	UID568	0.877823	0.572793	#VALUE!	0.187641
B2RXE2	Slc9a5	LTLPSMPSRNSVAETSVTNLLRESGSGACLD	_NSVAETS(ph)VTNLLR_	NaN	-0.991056	0.732074	-0.325588	-0.325588		S	570	2	___1	0.977441	UID569	NaN	-0.506107	-0.396498	0.0966667
B2RXW8	Ppfia1	PLRLDRMHKGAPHTVSHEDIRDLRNSTGSQD	_GAPHTVS(ph)HEDIR_	1.51139	0.353323	2.40184	1.2219	1.36665		S	772	2	___1	0.999993	UID570	0.617675	0.181802	-1.19591	-0.597452
B2RXW8	Ppfia1	RLRGPSLHHGRPHLGSVPDFRFSVADGHVDA	_PHLGS(ph)VPDFR_	0.917881	1.56421	NaN	1.95502	1.56421		S	529	2	___1	1	UID571	0.364909	0.801407	#VALUE!	-0.926289
B2RXW8	Ppfia1	GNHEQESAPSTNGKRSSDGSLSHEDLAKVLE	_RS(ph)SDGSLSHEDLAK_	1.53691	NaN	1.25142	2.00367	1.53691		S	238	3	___1	0.812677	UID572	0.62854	NaN	-0.645142	-0.948113
B2RXW8	Ppfia1	NHEQESAPSTNGKRSSDGSLSHEDLAKVLEL	_RSS(ph)DGS(ph)LSHEDLAK_	1.50476	2.30538	2.0709	1.48478	1.78783		S	239	2	___1	0.999687	UID573	0.614851	1.18066	-1.03747	-0.715367
B2RXW8	Ppfia1	ENTEQRAEEIESRVGSGSLDNLGRFRSMSSI	_VGS(ph)GSLDNLGR_	3.20638	1.47748	2.02487	1.58666	1.80577		S	665	2	___1	0.999909	UID575	1.33954	0.757023	-1.01543	-0.761066
B2RXW8	Ppfia1	TEQRAEEIESRVGSGSLDNLGRFRSMSSIPP	_VGSGS(ph)LDNLGR_	2.72521	2.09686	2.56445	1.2149	2.33066	Up	S	667	2	___1	0.999955	UID576	1.13462	1.07396	-1.27376	-0.594313
B2RXX4	Sbf1;Sbf1	ACCRDYQRLGLGTLSSSLSRAKSEPFRISPV	_LGLGTLSS(ph)SLSR_	1.78506	0.294804	0.888416	1.11295	1.00068		S	1140	2	___1	0.768717	UID577	0.734222	0.151859	-0.471349	-0.548586
B2RXX4	Sbf1;Sbf1	CCRDYQRLGLGTLSSSLSRAKSEPFRISPVN	_LGLGTLSSS(ph)LSR_	1.63453	0.222055	0.987453	0.54036	0.763907		S	1141	2	___1	0.915919	UID578	0.670115	0.114634	-0.518763	-0.291751
B2RY04	Dock5	PPPPKSKPYESSQRNSAEIAPPLPVRRDSKA	_NS(ph)AEIAPPLPVR_	-0.164198	0.140954	-0.431149	0.285297	-0.011622		S	1832	2	___1	1	UID582	-0.0959283	0.0731348	0.160404	-0.177343
B2RY04	Dock5	RNSAEIAPPLPVRRDSKAPPPPPPKARKSGI	_RDS(ph)KAPPPPPPK_	-4.77197	-3.41491	-4.41134	-2.02111	-3.91312	Down	S	1845	3	___1	1	UID583	-2.05829	-1.74637	2.06595	0.857185
B2RY04	Dock5	EPDVMSPGKKTQRPKSLQLVDSRLTPFHSPS	_S(ph)LQLVDSR_	0.328965	0.0701213	-0.35552	-0.304767	-0.117323		S	1765	2	___1	1	UID584	0.1141	0.0368901	0.124196	0.0873271
B2RY56-2	Rbm25	KLPVDSVFNKFEDEDSDDVPRKRKLVPLDYG	_FEDEDS(ph)DDVPR_	-0.648726	-0.568795	-0.668782	-0.721058	-0.658754		S	698	2	___1	1	UID585	-0.30228	-0.290039	0.274172	0.274053
B2RY56-2	Rbm25	HRPKIGLSLKLGASNSPGQPNSVKRKKLPVD	_LGASNS(ph)PGQPNSVK_	-0.202318	-0.337862	-0.800901	-0.428014	-0.382938		S	672	2	___1	1	UID586	-0.112163	-0.171872	0.337426	0.142609
B5B2N2	Nfatc1;Nfatc1;Nfatc1;Nfatc1;Nfatc1	LLGSPRHSPSTSPRASITEESWLGARGSRPT	_AS(ph)ITEESWLGAR_	-3.34802	-3.35408	-1.03154	-1.97821	-2.66311		S	247	2	___1	0.996529	UID587	-1.45186	-1.71525	0.447844	0.837943
Q8BTM8	Flna;Flna;Flna	GGLAIAVEGPSKAEISFEDRKDGSCGVAYVV	_AEIS(ph)FEDR_	-0.421942	1.61408	-0.0751824	1.34597	0.635394		S	2284	2	___1	1	UID588	-0.205696	0.826925	-0.010018	-0.653105
Q8BTM8	Flna;Flna;Flna	KVKAFGPGLQGGNAGSPARFTIDTKGAGTGG	_AFGPGLQGGNAGS(ph)PAR_	0.484647	1.0567	0.687073	0.6037	0.645387		S	1084	2	___1	1	UID589	0.180403	0.541713	-0.374954	-0.320162
Q8BTM8	Flna;Flna;Flna	EGRVKESITRRRRAPSVANIGSHCDLSLKIP	_RAPS(ph)VANIGSHCDLSLK_	0.566457	1.59798	-0.193069	0.472031	0.519244		S	2152	3	___1	1	UID590	0.215244	0.818687	0.0464211	-0.261103
Q8BTM8	Flna;Flna	MSSSHSRCGQSAAVASPGGSIDSRDAEMPAT	_CGQSAAVAS(ph)PGGSIDSR_	1.8197	3.46643	1.09911	0.165075	1.45941		S	16	2	___1	0.999983	UID591	0.748976	1.77476	-0.572222	-0.123418
Q8BTM8	Flna;Flna;Flna	DVTDASKVKCSGPGLSPGMVRANLPQSFQVD	_CSGPGLS(ph)PGMVR_	0.23052	-0.110879	-0.428991	-0.666874	-0.269935		S	1459	2	___1	1	UID593	0.0721745	-0.0557263	0.159371	0.249749
Q8BTM8	Flna;Flna;Flna	NYIINIKFADQHVPGSPFSVKVTGEGRVKES	_FADQHVPGS(ph)PFSVK_	1.95484	4.79941	1.89409	4.21768	3.08626		S	2128	2	___1	0.999983	UID594	0.80653	2.45683	-0.952825	-1.9412
Q8BTM8	Flna;Flna;Flna	NEEHIPDSPFVVPVASPSGDARRLTVSSLQE	_FNEEHIPDSPFVVPVAS(ph)PSGDAR_	-0.638799	1.21139	NaN	0.538549	0.538549		S	2327	3	___1	0.989726	UID595	-0.298052	0.620868	#VALUE!	-0.290939
Q8BTM8	Flna;Flna;Flna	IYLIDVKFNGTHIPGSPFKIRVGEPGHGGDP	_FNGTHIPGS(ph)PFK_	1.87488	3.50505	2.03102	NaN	2.03102		S	2414	3	___1	0.999981	UID596	0.772477	1.79452	-1.01838	#VALUE!
Q8BTM8	Flna;Flna;Flna	KIPEISIQDMTAQVTSPSGKTHEAEIVEGEN	_IPEISIQDMTAQVTS(ph)PSGK_	0.481058	2.363	-0.809475	2.28372	1.38239		S	2180	2	___1	0.997329	UID597	0.178874	1.21014	0.34153	-1.07373
Q8BTM8	Flna;Flna;Flna	SKGAGGQGKVASKIVSPSGAAVPCKVEPGLG	_IVS(ph)PSGAAVPCK_	-1.31674	1.90785	-1.4886	-1.95092	-1.40267		S	1010	2	___1	0.999578	UID599	-0.586774	0.977243	0.666666	0.825704
Q91W39	Ncoa5;Ncoa5;Ncoa5	_______MNTAPSRPSPTRRDPYSFGDSRDT	_(ac)M(ox)NTAPSRPS(ph)PTR_	0.484946	0.554978	0.446163	0.551127	0.518037		S	9	2	___1	0.999727	UID600	0.18053	0.284988	-0.259616	-0.29658
Q9R123	Nat6;Nat6	________MELILSTSPAKLTLDPARQPELT	_(ac)MELILSTS(ph)PAK_	2.35466	1.11117	2.88804	NaN	2.35466		S	8	2	___1	0.978952	UID601	0.976803	0.569588	-1.42868	#VALUE!
B7ZCJ1	Arhgap21;Arhgap21;Arhgap21	TPALAKMFDVMKKGKSTGSLLTPSRSESEKQ	_GKS(ph)TGSLLTPSR_	1.9043	2.29604	3.05412	0.390097	2.10017		S	1739	2	___1	0.999382	UID604	0.785006	1.17588	-1.5082	-0.224351
B7ZCJ1	Arhgap21;Arhgap21;Arhgap21	PWEEPSPPHSSKRNRSPTLSCRLAMLKEGPR	_NRS(ph)PTLSCR_	0.940689	NaN	0.645239	-0.0853448	0.645239		S	1512	2	___1	0.999934	UID607	0.374622	NaN	-0.354926	-0.0110936
B7ZCJ1	Arhgap21;Arhgap21;Arhgap21;Arhgap21	RLEDSVLMKYCPRSASQGALTSPPVSFNNHR	_SAS(ph)QGALTSPPVSFNNHR_	1.1778	1.58661	1.60419	0.922972	1.3822		S	482	3	___1	0.866404	UID608	0.475604	0.812868	-0.814032	-0.46337
B7ZCL8	Mpp1;Mpp1;Mpp1;Mpp1;Mpp1	VASVAHSAPSEAPSCSPFGKKKKCKDKYLAK	_VASVAHSAPSEAPSCS(ph)PFGK_	0.0630804	0.932563	0.615824	0.336401	0.476113		S	223	2	___1	0.963464	UID609	0.000865329	0.478195	-0.340843	-0.200266
B7ZCT1	Rgs19;Rgs19;Rgs19;Rgs19	SKLQPLPSCEVCTPPSPKEVQSWAQSFDKLM	_LQPLPSCEVCTPPS(ph)PK_	-0.440746	-1.35615	-0.753063	-1.15742	-0.955241		S	107	2	___1	1	UID610	-0.213705	-0.692921	0.314523	0.469782
J3QNK8	Abi1;Abi1;Abi1;Abi1;Abi1;Abi1	PNDYMTSPARLGSQHSPGRTASLNQRPRTHS	_LGSQHS(ph)PGR_	0.248516	0.20167	NaN	-0.0179065	0.20167		S	225	2	___1	0.99997	UID611	0.0798389	0.104202	#VALUE!	-0.0413428
Q8CHP6	Phc3;Phc3;Phc3	RKPDNQSLGHRGRRPSGPEGAAREHILRQLP	_RPS(ph)GPEGAAR_	1.86296	-0.155152	1.4107	1.38828	1.39949		S	840	2	___1	1	UID612	0.767401	-0.0783809	-0.721397	-0.672083
B7ZNL3	Tpm1;Tpm1;Tpm1;Tpm1	TRAEFAERSVTKLEKSIDDLEEKVAHAKEEN	_S(ph)IDDLEEK_	4.42737	3.85577	4.88073	1.48262	4.14157	Up	S	252	2	___1	1	UID613	1.85953	1.97398	-2.3827	-0.714397
B7ZNL3	Tpm1;Tpm1;Tpm1;Tpm1;Tpm1;Tpm1;Tpm1;Tpm1;Tpm1;Tpm1;Tpm1	DRKYEEVARKLVIIESDLERAEERAELSEGK;DRKYEEVARKLVIIESDLERAEERAELSEGQ	_LVIIES(ph)DLER_	0.0255992	1.47531	1.12368	0.062189	0.592935		S	174	2	___1	1	UID614	-0.0150972	0.755913	-0.583982	-0.0772693
B7ZNL9	Tatdn2;Tatdn2	GSDWSDVDELATVRFSQEEPVPLKYSAVSES	_FS(ph)QEEPVPLK_	-0.326074	0.552431	-0.0534686	-0.497763	-0.189771		S	371	2	___1	1	UID615	-0.164868	0.283685	-0.0204137	0.173895
Q80TH2-2	Erbb2ip;Erbb2ip	SPQRSGPTGAVVKSHSITNMETGGLKIYDIL	_SHS(ph)ITNMETGGLK_	0.970345	-0.217001	1.61725	-0.673359	0.376672		S	869	2	___1	0.999965	UID616	0.387252	-0.110028	-0.820285	0.252658
Q80TH2-2	Erbb2ip;Erbb2ip	YSRTSPSKRPNTRVGSEHSLLDPPGKSKVPH	_VGS(ph)EHSLLDPPGK_	1.95852	0.559371	3.41609	-1.07008	1.25895		S	1171	2	___1	1	UID617	0.808097	0.287236	-1.68149	0.430606
B8JJ92	Acin1;Acin1;Acin1;Acin1;Acin1;Acin1	KISVVSATKGVQAGNSDTEGGQPGRKRRWGA;RKISVVSTKGVQAGNSDTEGGQPGRKRRWGA	_GVQAGNS(ph)DTEGGQPGRK_	0.0664643	-0.102597	0.562486	-0.577455	-0.0180663		S	838	2	___1	0.999753	UID620	0.00230651	-0.0514888	-0.315307	0.20964
B8JJ92	Acin1;Acin1;Acin1;Acin1;Acin1;Acin1	GQEAVVDLHADDSRISEDETERNGDDGTHDK	_IS(ph)EDETER_	-0.206238	-0.0870956	-0.370688	-0.00965416	-0.146667		S	898	2	___1	1	UID621	-0.113832	-0.0435567	0.131458	-0.0450444
B8JJ92	Acin1;Acin1;Acin1;Acin1;Acin1;Acin1	KRRWGASTAATQKKPSISITTESLKSLIPDI	_KPS(ph)ISITTESLK_	-2.78599	-0.111787	-4.76051	NaN	-2.78599		S	863	2	___1	1	UID622	-1.2125	-0.0561912	2.23312	#VALUE!
B8JJ92	Acin1;Acin1;Acin1;Acin1;Acin1	VSITIDDPVRTAQVPSPPRGKISNIVHISNL	_TAQVPS(ph)PPR_	-0.498592	-0.86682	-0.597168	-0.880366	-0.731994		S	1003	2	___1	1	UID623	-0.23834	-0.442536	0.239887	0.34551
B8JJC1	Tdp1;Tdp1	QEQPKRVLPQEKKHVSSPDVTTAQKVVDRSP	_HVS(ph)SPDVTTAQK_	-0.906722	-0.314834	-0.985902	-0.911854	-0.909288		S	118	2	___1	0.94248	UID624	-0.412155	-0.160089	0.425996	0.359634
B8JJC1	Tdp1;Tdp1	EQPKRVLPQEKKHVSSPDVTTAQKVVDRSPP	_HVSS(ph)PDVTTAQK_	-1.15709	-0.225808	-1.00223	0.0445582	-0.614019		S	119	2	___1	0.997537	UID625	-0.518784	-0.114535	0.433814	-0.0693611
B8JK87	Amotl2;Amotl2;Amotl2;Amotl2	AATAAAQRDTTLIRHSPQPSPSSSFNEGLLP	_HS(ph)PQPSPSSSFNEGLLPGNHR_	NaN	-2.86709	-3.38015	-1.28336	-2.86709		S	632	3	___1	0.998795	UID626	NaN	-1.46606	1.57226	0.526269
B8JK87	Amotl2;Amotl2;Amotl2	EPDGLLGCNSSQRTPSLDSIAATRVQDLSDM	_TPS(ph)LDSIAATR_	-1.62949	-1.48503	-2.52635	-0.968752	-1.55726		S	785	2	___1	1	UID627	-0.71997	-0.758868	1.1635	0.385155
B9EHJ3	Tjp1;Tjp1	WRFRGLRSSKRNLRKSREDLSAQPVQTKFPA	_S(ph)REDLSAQPVQTK_	1.57157	0.25004	2.06448	0.0266207	0.910805		S	617	2	___1	1	UID629	0.643302	0.128953	-1.0344	-0.0613153
B9EHJ3	Tjp1;Tjp1	LRSSKRNLRKSREDLSAQPVQTKFPAYERVV	_SREDLS(ph)AQPVQTK_	1.72962	0.186415	NaN	0.185072	0.186415		S	622	3	___1	0.932413	UID630	0.710614	0.0963968	#VALUE!	-0.132388
B9EHJ3	Tjp1;Tjp1	SASRERSLSPRSDRRSVASSQPAKPTKVTLV	_S(ph)VAS(ph)SQPAKPTK_	0.137749	0.113213	-0.295199	-0.105153	0.00403		S	175	2	___1	1	UID631	0.0326651	0.0589399	0.0953169	-0.00220897
B9EHJ7	Tcf20;Tcf20;Tcf20	SDTTYKCGASEKAGSSPTQGAQNEAPRLSTS	_AGSS(ph)PTQGAQNEAPR_	-0.202245	-0.148195	-0.47611	-0.102961	-0.17522		S	588	2	___1	0.970513	UID633	-0.112132	-0.0748208	0.181929	-0.0031919
B9EHJ7	Tcf20;Tcf20;Tcf20	KGSQEDDPAASQRPPSNSGVKEISHTSLPQP	_GSQEDDPAASQRPPS(ph)NSGVK_	NaN	0.153789	0.992508	0.644515	0.644515		S	669	2	___1	0.982703	UID634	NaN	0.0797024	-0.521183	-0.338469
B9EHJ7	Tcf20;Tcf20;Tcf20	LPNPDNRNCPAVTLTSPAKTKILPPRKGRGL	_NCPAVTLTS(ph)PAK_	1.54216	NaN	-0.140973	-0.617534	-0.140973		S	1363	2	___1	0.998173	UID635	0.630778	NaN	0.0214797	0.227618
B9EHJ7	Tcf20;Tcf20;Tcf20	DHSSQNPLIMRRRVRSFISPIPSKRQSQDVK	_VRS(ph)FISPIPSK_	-2.37933	-1.23906	-2.63314	-1.79075	-2.08504		S	1287	2	___1	0.997645	UID636	-1.03931	-0.633009	1.21462	0.753861
B9EID4	Rab11fip2;Rab11fip2;Rab11fip2;Rab11fip1;Rab11fip1	EIEVDIQFMRNNMTASMFDLSMKDKSRNPFG;EIKVNIQFMRNNMTASMFDLSMKDKTRSPFA	_NNMTAS(ph)MFDLSMK_	-0.689658	-1.62013	-0.61244	-0.468262	-0.651049		S	158	2	___1	0.999992	UID637	-0.319712	-0.827999	0.247198	0.160662
B9EIF6	Zfp36l2;Zfp36l2	AAPSSSFTPGFLRRHSASNLHALAHPVPSPG	_RHS(ph)ASNLHALAHPVPSPGSCSPK_	-0.633139	1.01946	-0.514384	0.708094	0.096855		S	57	5	___1	0.839061	UID638	-0.295641	0.522658	0.200253	-0.366987
B9EIF6	Zfp36l2;Zfp36l2	PSSSFTPGFLRRHSASNLHALAHPVPSPGSC	_HSAS(ph)NLHALAHPVPSPGSCSPK_	-0.517667	1.24365	-0.533731	0.462909	-0.027379		S	59	4	___1	0.8858	UID639	-0.246464	0.637378	0.209516	-0.257011
B9EIF6	Zfp36l2	PAPPPAQPPAAPAPPSPPFGFQLPRRLSESP	_NQQQGLTGPAPPPAQPPAAPAPPS(ph)PPFGFQLPR_	-2.12633	0.822354	NaN	1.16135	0.822354		S	416	3	___1	0.999999	UID641	-0.931563	0.421802	#VALUE!	-0.570293
B9EJ80	Pdzd8	DVRVQTELKEETQPLSHSPKRTPTTLSIKPL	_VQTELKEETQPLS(ph)HSPK_	0.314851	-0.14167	1.61491	-0.524453	0.0865905		S	513	3	___1	0.966582	UID643	0.10809	-0.0714819	-0.819165	0.185867
B9EJ80	Pdzd8	RVQTELKEETQPLSHSPKRTPTTLSIKPLGA	_VQTELKEETQPLSHS(ph)PK_	0.679519	-0.267227	1.90321	-0.412535	0.206146		S	515	3	___1	0.973496	UID644	0.263395	-0.135729	-0.957188	0.135666
B9EJ80	Pdzd8	SKTRLSEPGTDLVEPSPKHTPNTSDNEGSDT	_LSEPGTDLVEPS(ph)PK_	4.7654	3.31468	3.55971	2.25803	3.4372	Up	S	960	2	___1	1	UID645	2.00349	1.69711	-1.75025	-1.0622
B9EJ80	Pdzd8	KRTPTTLSIKPLGAISPVLNRKLISGIHPPP	_PLGAIS(ph)PVLNR_	0.831022	0.270592	1.85659	0.974604	0.902813		S	532	2	___1	1	UID646	0.327917	0.13947	-0.934869	-0.48653
B9EKI3	Tmf1;Tmf1	FSVQSLDSRSVSEINSDDELPGKGYALVPII	_SVSEINS(ph)DDELPGK_	0.649471	1.2167	NaN	0.521908	0.649471		S	340	2	___1	0.999999	UID648	0.250598	0.623586	#VALUE!	-0.283474
B9EKS2	Kdm3b;Kdm3b	TNYLSRVSESVADDSSSRDSFTQSLESLTSG	_VSESVADDSS(ph)SR_	-0.0856823	-0.331232	0.0655102	-1.50511	-0.208457		S	553	2	___1	0.850885	UID650	-0.0624899	-0.168479	-0.0773758	0.625738
Q52KF3-3	Spire1;Spire1;Spire1	AMCSRKKPPKFLPISSTPQPERRQPPQRRHS	_FLPISS(ph)TPQPER_	2.18941	-0.0729794	2.5379	NaN	2.18941		S	350	2	___1	0.871683	UID651	0.906429	-0.0363335	-1.26105	#VALUE!
D3YTT6	Osbpl3;Osbpl3;Osbpl3;Osbpl3	AIQVPKPFSGPVRLHSSNPNLSTLDFGEEKS;TLQVPKPFSGPVRLHSSNPNLSTLDFGEEKS	_LHS(ph)SNPNLSTLDFGEEK_	-0.575626	0.450075	NaN	0.180985	0.180985		S	271	2	___1	0.864001	UID654	-0.271148	0.23131	#VALUE!	-0.130555
D3YTT6	Osbpl3;Osbpl3;Osbpl3;Osbpl3	IQVPKPFSGPVRLHSSNPNLSTLDFGEEKSY;LQVPKPFSGPVRLHSSNPNLSTLDFGEEKSY	_LHSS(ph)NPNLSTLDFGEEK_	-0.409425	0.438522	-0.917162	-0.39698	-0.403203		S	272	2	___1	0.998417	UID655	-0.200366	0.225398	0.393087	0.128689
D3YTT6	Osbpl3;Osbpl3;Osbpl3;Osbpl3	ESVSSRKRSSLSKQNSFPPGSNLSFSCGGDT	_QNS(ph)FPPGSNLSFSCGGDTR_	NaN	0.586961	-1.16992	-0.36802	-0.36802		S	191	2	___1	1	UID657	NaN	0.301354	0.514097	0.115699
D3YTT6	Osbpl3;Osbpl3	MSQLLESMDVLHRTYSAPAINAIQGGAFESP	_TYS(ph)APAINAIQGGAFESPK_	-2.04645	-1.69885	-2.52164	-0.917364	-1.87265		S	250	2	___1	0.86959	UID658	-0.897543	-0.868279	1.16124	0.362105
Q8BUL6	Plekha1;Plekha1;Plekha1	GPGRSSSSMRQARRLSNPCIQRSIPAGLQNP	_RLS(ph)NPCIQR_	0.746862	-0.595708	0.658139	2.87972	0.7025		S	308	2	___1	1	UID660	0.292075	-0.30381	-0.361101	-1.34106
D3YU05	Gm6316;Gapdh;Gapdh;Gm4795	LWRDGRGAAQNIIPASTGAAKAVGKVIPELN	_GAAQNIIPAS(ph)TGAAK_	-1.58663	-0.793524	-1.12442	-1.31403	-1.21923		S	208	2	___1	0.941778	UID661	-0.701717	-0.405031	0.492315	0.540027
D3YU05	Gm6316;Gm7293;Gapdh;Gm5069;Gm4795	MGVNHEKYDNSLKIVSNASCTTNCLAPLAKV	_IVS(ph)NASCTTNCLAPLAK_	-0.771866	NaN	-0.498869	-0.451529	-0.498869		S	146	2	___1	0.851143	UID662	-0.354723	NaN	0.192825	0.153157
D3YU05	Gm6316;Gm7293;Gapdh;Gm5069;Gm4795	NHEKYDNSLKIVSNASCTTNCLAPLAKVIHD	_IVSNAS(ph)CTTNCLAPLAK_	-1.20101	-0.660556	-0.435999	-1.01472	-0.837638		S	149	2	___1	0.992742	UID663	-0.537487	-0.336992	0.162726	0.405775
P49025-5	Cit;Cit;Cit;Cit;Cit	RYRDREGRTELRRDKSPGRPLEREKSPGRML	_DKS(ph)PGRPLER_	-0.42949	1.16629	0.786467	0.997215	0.891841		S	2029	2	___1	1	UID664	-0.208911	0.597793	-0.42254	-0.496672
Q69Z89	Radil;Radil;Radil	RAKGTPALTSEAAQSSPPTRLRRTVSETSLS	_GTPALTSEAAQSS(ph)PPTR_	5.25347	4.00879	5.45194	6.27001	5.35271	Up	S	235	2	___1	0.999875	UID666	2.21135	2.05228	-2.65617	-2.86176
Q8K4J6	Mkl1;Mkl1;Mkl1	QIVKEEGARAASCCLSPGARAELEGLDKDQM	_AASCCLS(ph)PGAR_	0.716291	3.56281	1.29371	4.06664	2.42826		S	548	2	___1	1	UID667	0.279055	1.82408	-0.665386	-1.87345
Q8K4J6	Mkl1;Mkl1;Mkl1	LQLEQQKRAQQPAPASSPVKRESGFSSCQLS	_AQQPAPAS(ph)SPVK_	1.47455	3.09627	1.67349	2.79124	2.23237		S	605	2	___1	0.848243	UID668	0.601982	1.58535	-0.847207	-1.30137
Q8K4J6	Mkl1;Mkl1;Mkl1	QLEQQKRAQQPAPASSPVKRESGFSSCQLSC	_AQQPAPASS(ph)PVKR_	1.37259	3.18496	1.46763	2.96593	2.21678		S	606	2	___1	0.996918	UID669	0.558562	1.63073	-0.74865	-1.37973
Q6IFT4	Arhgap20;Arhgap20	PGTKKKMKTLAERRRSAPSLILDKALQKRPS	_S(ph)APSLILDK_	6.33568	5.46207	-0.816601	3.76086	4.61146	Up	S	46	2	___1	0.999999	UID673	2.67224	2.79591	0.344942	-1.73629
Q61161	Map4k2;Map4k2	TIHSRSHHGPAERTPSEIQFHQVKFGAPRRK	_TPS(ph)EIQFHQVK_	-0.42949	-2.0022	NaN	-1.04396	-1.04396		S	328	2	___1	0.999384	UID674	-0.208911	-1.0235	#VALUE!	0.418891
D3YUJ3	Ccnyl1;Ccnyl1;Ccny	DDLNMEFNPSDHPRASTIFLSKSQTDVREKR;EDLALESNPSDHPRASTIFLSKSQTDVREKR	_AS(ph)TIFLSK_	3.29242	1.48564	2.87759	0.648381	2.18161		S	66	2	___1	0.999816	UID675	1.37618	0.7612	-1.42368	-0.340203
D3YUJ3	Ccnyl1;Ccnyl1	DKYKDLCRAAMRRSLSADNFIGIQRSNAILS	_SLS(ph)ADNFIGIQR_	1.45328	0.57389	1.20253	0.31897	0.88821		S	352	2	___1	0.999998	UID676	0.592923	0.294665	-0.621733	-0.192447
D3YUV1	Nrbp1;Nrbp1	______________MSEGESQTVVSSGSDPK	_(ac)S(ph)EGESQTVVSSGSDPK_	-0.774987	0.473038	NaN	0.823721	0.473038		S	2	2	___1	0.969033	UID677	-0.356051	0.24306	#VALUE!	-0.418851
D3YUV1	Nrbp1;Nrbp1	FGLPRPQQPQQEEVTSPVVPPSVKTPTPEPA	_PQQPQQEEVTS(ph)PVVPPSVK_	-3.80743	NaN	-3.44848	-0.624394	-3.44848		S	430	3	___1	0.980087	UID678	-1.64751	NaN	1.60497	0.230695
Q8BZH4	Pogz;Pogz;Pogz;Pogz	FLVASVLPGPDGNVNSPTRNADMQEELIASL	_SFLVASVLPGPDGNVNS(ph)PTR_	-1.27362	-2.95981	-3.42351	-2.56433	-2.76207	Down	S	1334	2	___1	0.963001	UID680	-0.568409	-1.5135	1.59302	1.10084
Q0VEE6	Znf800;Zfp800	DIATKPGQPLFLDSASPKKSFKTRKQKSSKA	_PGQPLFLDSAS(ph)PK_	-1.98659	NaN	0.0674506	5.56264	0.0674506		S	337	2	___1	0.993452	UID683	-0.87205	NaN	-0.0783048	-2.54448
Q9JJ78	Pbk;Pbk	GINNFKTPNKSEKRKSVLCSTPCVNIPASPF	_S(ph)VLCSTPCVNIPASPFMQK_	-1.30577	-1.07634	NaN	-2.24684	-1.30577		S	18	2	___1	0.999986	UID684	-0.582102	-0.549747	#VALUE!	0.958434
Q8C5W3-2	Tbcel;Tbcel	RGPGVGVHVPATPQGSPMKDRLNLPSVLVLN	_GPGVGVHVPATPQGS(ph)PMKDR_	-0.228747	-2.205	-0.252016	-4.31461	-1.22851		S	59	3	___1	0.999919	UID685	-0.123418	-1.12727	0.0746424	1.88593
E9Q1U2	Synpo2;Synpo2;Synpo2	VVDSDTVQAHTVRAQSPTPSLPASWKYSSNV	_AQS(ph)PTPSLPASWK_	4.73204	6.90147	3.76765	-3.44804	4.24984	Up	S	895	2	___1	0.999998	UID688	1.98928	3.53244	-1.8498	1.49723
D3YVW2	Golim4;Golim4	FEEAEQVREENLPEESEEQKQSEAKQGNVEM	_EENLPEES(ph)EEQK_	2.27648	4.36287	2.48499	5.02288	3.42393	Up	S	568	2	___1	1	UID689	0.943509	2.23346	-1.23572	-2.30237
Q9JM93	Arl6ip4;Arl6ip4;Arl6ip4	QAEALPGPSLDQWHRSAGEDNDGPVLTDEQK	_S(ph)AGEDNDGPVLTDEQK_	0.0887133	0.0452775	0.810472	0.670895	0.379804		S	140	2	___1	1	UID690	0.0117819	0.0241777	-0.434032	-0.350302
D3YXK1	Samd1	APTRAPRAAAATAPPSPGPAQPGPRAQRAAP	_AAAATAPPS(ph)PGPAQPGPR_	-0.653659	-1.30283	0.595816	-2.20837	-0.978244		S	150	2	___1	1	UID694	-0.30438	-0.665638	-0.331264	0.941181
D3YXK2	Safb;Safb2	EATSQELVRAPTAALSPEPQDSKEDVKKFAF	_APTAALS(ph)PEPQDSK_	0.389763	0.376838	0.305038	0.513853	0.383301		S	366	2	___1	1	UID695	0.139993	0.193835	-0.192052	-0.279862
D3YXK2	Safb;Safb2	LVRAPTAALSPEPQDSKEDVKKFAFDACNDV	_APTAALSPEPQDS(ph)KEDVKK_	0.595801	NaN	0.243567	0.236746	0.243567		S	372	3	___1	0.984083	UID696	0.227741	NaN	-0.162622	-0.155566
D3YXK2	Safb	SQDRKSASREKRSVVSFDKVKESRKSRDSES	_SVVS(ph)FDKVK_	0.722985	-0.700186	0.726328	-0.0100853	0.35645		S	626	2	___1	1	UID697	0.281906	-0.357271	-0.393747	-0.044851
Q60953	Pml;Pml;Pml;Pml	TSSPEQSWPSTFKATSPPHLDGTSNPESTVP	_ATS(ph)PPHLDGTSNPESTVPEK_	-1.25009	-0.805196	-1.58977	-0.988883	-1.11949		S	528	2	___1	0.946674	UID698	-0.558389	-0.411004	0.715103	0.394185
Q60953	Pml;Pml;Pml;Pml	IKMESTEENEDRLATSSPEQSWPSTFKATSP	_LATS(ph)S(ph)PEQSWPSTFK_	-0.631768	-0.947311	NaN	-0.317155	-0.631768		S	514	2	___1	0.998522	UID701	-0.295057	-0.483723	#VALUE!	0.0928839
Q60953	Pml;Pml;Pml;Pml	KMESTEENEDRLATSSPEQSWPSTFKATSPP	_LATS(ph)S(ph)PEQSWPSTFK_	-0.394899	-0.849858	-0.937744	-0.864124	-0.856991		S	515	2	___1	0.999961	UID702	-0.194179	-0.433857	0.40294	0.338225
Q60953	Pml;Pml;Pml;Pml	KCSHEDCSRKIIKMESTEENEDRLATSSPEQ	_MES(ph)TEENEDR_	-1.34504	0.225178	-1.79243	0.443061	-0.559931		S	503	2	___1	0.994781	UID704	-0.598828	0.116232	0.812129	-0.248108
Q60953	Pml;Pml;Pml;Pml;Pml;Pml	ETEPVSVQKVPAPPGSPCRQQDSALTPTPTM	_VPAPPGS(ph)PCR_	-1.39013	-1.24655	-0.761048	-0.54278	-1.0038		S	17	2	___1	1	UID705	-0.61803	-0.63684	0.318346	0.194087
Q91YS4	Klc2;Klc2;Klc2	GGPQEPPNSRMKRASSLNFLNKSVEEPVQPG	_ASS(ph)LNFLNK_	0.0294311	-0.843391	0.00641563	-0.100381	-0.0469827		S	579	2	___1	0.999983	UID707	-0.0134653	-0.430548	-0.0490838	-0.00434907
D3YYI7	Rnf217	GGARASGGGSAGQPESPRPRGDRVRTAGPRA	_ASGGGSAGQPES(ph)PRPR_	0.717686	0.560064	1.74596	0.298782	0.638875		S	27	3	___1	1	UID708	0.27965	0.287591	-0.881906	-0.183392
D3YYT1	Glyr1;Glyr1	EERSRPNSGDEKRKLSLSEGKVKKNMGEGKK	_KLS(ph)LSEGK_	-2.67214	-1.66768	-3.29713	-2.68616	-2.67915	Down	S	130	2	___1	0.999948	UID710	-1.16401	-0.852329	1.53252	1.15549
D3YYU8	Obsl1	___________MKAGSGDQGSPPCFLRFPRP	_AGS(ph)GDQGSPPCFLR_	-0.1201	-1.45239	-1.00535	-2.62729	-1.22887		S	5	2	___1	0.999995	UID711	-0.0771476	-0.742169	0.435309	1.12909
D3YYU8	Obsl1	______MKAGSGDQGSPPCFLRFPRPVRVVS	_AGSGDQGS(ph)PPCFLR_	-0.276724	-1.3334	-0.535815	-2.72633	-0.934608		S	10	2	___1	0.999999	UID712	-0.143851	-0.681284	0.210514	1.17351
O35144	Terf2;Terf2	KLDQKDLVLANLASPSSPAHKHKRPRKDEHE	_DLVLANLASPS(ph)SPAHK_	1.01895	1.45469	2.06127	0.602255	1.23682		S	366	2	___1	0.982753	UID713	0.407951	0.745366	-1.03286	-0.319514
O35144	Terf2;Terf2	LDQKDLVLANLASPSSPAHKHKRPRKDEHES	_DLVLANLASPSS(ph)PAHK_	1.02532	1.42494	1.95692	0.65323	1.22513		S	367	2	___1	0.999562	UID714	0.410667	0.73014	-0.982905	-0.342378
Q6PF93	Pik3c3;Pik3c3;Pik3c3;Pik3c3	DKEYGIVYYEKDGDESSPILTSFELVKVPDP	_DGDES(ph)SPILTSFELVK_	-0.774163	-1.45985	-2.01469	NaN	-1.45985		S	243	2	___1	0.805298	UID715	-0.355701	-0.745987	0.918539	#VALUE!
Q6PF93	Pik3c3;Pik3c3;Pik3c3;Pik3c3	KEYGIVYYEKDGDESSPILTSFELVKVPDPQ	_DGDESS(ph)PILTSFELVK_	NaN	-1.26352	-1.66106	-0.519926	-1.26352		S	244	2	___1	0.956706	UID716	NaN	-0.645525	0.749234	0.183836
D3YZP9	Ccdc6	RILQEKLDQPVSAPPSPRDISMEIDSPENMM	_LDQPVS(ph)APPS(ph)PR_	1.14795	1.40447	0.558701	0.298782	0.853325		S	237	2	___1	1	UID723	0.46289	0.719665	-0.313495	-0.183392
D3YZP9	Ccdc6	GSGGGGGGKSGGIVISPFRLEELTNRLASLQ	_SGGIVIS(ph)PFR_	1.19941	-0.156373	NaN	0.268501	0.268501		S	45	2	___1	1	UID724	0.484808	-0.0790055	#VALUE!	-0.16981
P18911	Rarg;Rarg	PGAGFPFAFPGALRGSPPFEMLSPSFRGLGQ	_GS(ph)PPFEMLSPSFR_	1.37926	-1.52147	2.23905	-1.43558	-0.02816		S	36	2	___1	1	UID725	0.561399	-0.777517	-1.11798	0.594549
Q3U717	Tmbim1;Tmbim1;Tmbim1;Tmbim1	PMNYGHDYNEEERAGSDSFRPGEWDDRKVRH	_AGS(ph)DSFRPGEWDDR_	1.00436	1.24565	0.528149	0.850881	0.92762		S	79	3	___1	0.999978	UID731	0.40174	0.638398	-0.298868	-0.431034
G3UWC5	Tgif1;Tgif1;Tgif1;Tgif1	HSCVVGPNPTLGRPVSPKPPSPGSILARPSV	_PVS(ph)PKPPS(ph)PGSILAR_	-1.6668	0.642915	-1.043	2.38907	-0.200042		S	190	2	___1	1	UID732	-0.73586	0.329985	0.453333	-1.12098
G3UWC5	Tgif1;Tgif1;Tgif1;Tgif1	GPNPTLGRPVSPKPPSPGSILARPSVICHTT	_PVSPKPPS(ph)PGSILAR_	NaN	-0.0476783	-1.86484	2.82398	-0.0476783		S	195	3	___1	0.999756	UID733	NaN	-0.0233871	0.846794	-1.31606
Q9Z1E4	Gys1;Gys1	PRPASVPPSPSLSRHSSPHQSEDEEEPRDGP	_HS(ph)SPHQSEDEEEPR_	2.15051	1.4589	2.90977	2.5861	2.36831	Up	S	652	3	___1	0.859109	UID734	0.889863	0.747516	-1.43909	-1.20936
Q9Z1E4	Gys1;Gys1	RPASVPPSPSLSRHSSPHQSEDEEEPRDGPL	_HSS(ph)PHQS(ph)EDEEEPR_	2.02386	1.46192	3.02198	2.49308	2.25847	Up	S	653	3	___1	0.982447	UID735	0.835924	0.749062	-1.49281	-1.16764
Q8BGB2	Ttc7a;Ttc7	TLYNFSQLGGLEKDGSFEGLTVKKQNGIHLT	_DGS(ph)FEGLTVK_	5.46919	2.08209	5.19064	2.20752	3.69908	Up	S	648	2	___1	1	UID740	2.30323	1.0664	-2.53107	-1.03955
Q8BGB2	Ttc7a;Ttc7	EAFVIKGLSLERLPNSVASHIRLTEREEEVV	_LPNS(ph)VASHIR_	3.90628	1.81497	3.46943	1.95068	2.71006		S	183	2	___1	0.998516	UID741	1.63761	0.929715	-1.70703	-0.924344
Q9ES28	Arhgef7;Arhgef7	PSNYVREIKPSEKPVSPKSGTLKSPPKGFDT	_EIKPSEKPVS(ph)PK_	-1.67511	1.39692	-1.31332	1.51247	0.0418		S	228	2	___1	0.999994	UID743	-0.739396	0.715806	0.582749	-0.727786
Q9ES28	Arhgef7;Arhgef7	AHSYRMGSASRSRKESAPQVLLPEEEKIIVE	_KES(ph)APQVLLPEEEK_	-4.39907	-0.469424	-4.73987	0.11198	-2.43425		S	776	2	___1	1	UID744	-1.89948	-0.239191	2.22324	-0.0996027
Q9ES28	Arhgef7;Arhgef7	TMKKLLPKRKPERKPSDEEFAVRKSTAALEE	_KPS(ph)DEEFAVR_	0.145357	1.45352	0.068978	1.31366	0.729509		S	673	2	___1	1	UID745	0.0359054	0.744764	-0.079036	-0.638613
Q9ES28	Arhgef7;Arhgef7	LFPNLLLMLSASPRMSGFIYQGKLPTTGMTI	_MS(ph)GFIYQGK_	0.803382	0.327604	0.669695	0.602134	0.635914		S	497	2	___1	1	UID746	0.316146	0.168642	-0.366634	-0.31946
Q9ES28	Arhgef7;Arhgef7	LQSQYRSLDMTDNTNSQLVVRAKFNFQQTNE	_(ac)TDNTNS(ph)QLVVR_	1.81486	-0.575352	2.07771	0.124445	0.969653		S	164	2	___1	0.999882	UID747	0.746915	-0.293394	-1.04073	-0.105194
D3Z0X5	Phldb1;Phldb1;Phldb1;Phldb1;Phldb1	RELPPLSPSLSRRALSPLPARTAPDPKLSRE	_ALS(ph)PLPAR_	0.352048	0.495107	1.75414	0.738853	0.61698		S	472	2	___1	1	UID748	0.123931	0.254352	-0.885819	-0.380784
D3Z0X5	Phldb1;Phldb1;Phldb1;Phldb1;Phldb1	LGRRGLDSMRELPPLSPSLSRRALSPLPART	_ELPPLS(ph)PSLSR_	3.40195	3.0667	3.44503	2.33022	3.23433	Up	S	463	2	___1	0.998779	UID749	1.42282	1.57022	-1.69535	-1.09459
D3Z0X5	Phldb1;Phldb1;Phldb1;Phldb1;Phldb1	PAPRNKIGTLQDRPPSPFREPPGTERVLTSS	_IGTLQDRPPS(ph)PFR_	-0.445896	-0.236727	-0.0616183	-0.375729	-0.306228		S	405	3	___1	0.999909	UID751	-0.215898	-0.120122	-0.016512	0.119157
D3Z0X5	Phldb1;Phldb1;Phldb1;Phldb1;Phldb1;Phldb1	TGASPRQSPRAQRKLSSGDLRVPIPRERKNS	_KLS(ph)SGDLR_	-0.03812	0.958753	-0.267713	1.09892	0.460317		S	565	2	___1	0.999024	UID752	-0.042234	0.491597	0.0821575	-0.54229
D3Z0X5	Phldb1;Phldb1;Phldb1;Phldb1;Phldb1;Phldb1	GESLAPRKGSFSGRLSPAYSLGSLTGASPRQ	_LS(ph)PAYSLGSLTGASPR_	0.230841	1.96484	0.208824	1.81426	1.02255		S	541	2	___1	1	UID753	0.0723116	1.00641	-0.145988	-0.863152
D3Z0X5	Phldb1;Phldb1;Phldb1;Phldb1;Phldb1;Phldb1	APRKGSFSGRLSPAYSLGSLTGASPRQSPRA	_LSPAYS(ph)LGSLTGASPR_	0.261632	2.27876	1.67002	2.1861	1.92806		S	545	2	___1	0.957821	UID754	0.0854246	1.16704	-0.845546	-1.02994
D3Z0X5	Phldb1;Phldb1;Phldb1;Phldb1;Phldb1;Phldb1	KGSFSGRLSPAYSLGSLTGASPRQSPRAQRK	_LSPAYSLGS(ph)LTGASPR_	NaN	2.22412	0.501686	1.86806	1.86806		S	548	3	___1	0.904067	UID755	NaN	1.13908	-0.286199	-0.887287
D3Z0X5	Phldb1;Phldb1;Phldb1;Phldb1;Phldb1;Phldb1	GRLSPAYSLGSLTGASPRQSPRAQRKLSSGD	_LS(ph)PAYSLGSLTGAS(ph)PR_	2.58326	2.2824	3.82998	2.25065	2.43283	Up	S	553	2	___1	1	UID756	1.07416	1.1689	-1.87965	-1.05889
D3Z0X5	Phldb1;Phldb1;Phldb1;Phldb1;Phldb1;Phldb1;Phldb1;Phldb1;Phldb1;Phldb1	RSPSPKSALLAQNGTSSLPRNLAATLQDIET	_SALLAQNGTS(ph)SLPR_	1.73273	NaN	3.33588	1.77998	1.77998		S	1077	2	___1	0.903464	UID758	0.711935	NaN	-1.64309	-0.847778
D3Z0X5	Phldb1;Phldb1;Phldb1;Phldb1;Phldb1;Phldb1;Phldb1;Phldb1;Phldb1;Phldb1	SPSPKSALLAQNGTSSLPRNLAATLQDIETK	_SALLAQNGTSS(ph)LPR_	1.96181	1.77066	3.18848	2.00609	1.98395		S	1078	2	___1	0.983245	UID759	0.809497	0.907045	-1.57252	-0.949199
D3Z0X5	Phldb1;Phldb1;Phldb1;Phldb1;Phldb1;Phldb1	EDFSLTLGARGRRTRSPSPTLGESLAPRKGS	_S(ph)PS(ph)PTLGESLAPR_	1.60115	0.818563	1.60732	1.4924	1.54678		S	520	2	___1	0.999995	UID760	0.655901	0.419862	-0.815529	-0.718783
D3Z0X5	Phldb1;Phldb1;Phldb1;Phldb1;Phldb1;Phldb1	FSLTLGARGRRTRSPSPTLGESLAPRKGSFS	_S(ph)PS(ph)PTLGESLAPR_	NaN	0.169752	0.949313	0.662745	0.662745		S	522	2	___1	0.99998	UID761	NaN	0.0878702	-0.500504	-0.346646
D3Z0X5	Phldb1;Phldb1;Phldb1;Phldb1;Phldb1	VLTSSPSRQLVGRTFSDGLAATRTLQPPESP	_TFS(ph)DGLAATR_	2.76966	3.42509	2.64373	2.74707	2.75836	Up	S	431	2	___1	0.999999	UID762	1.15355	1.7536	-1.31172	-1.28156
D3Z0X5	Phldb1;Phldb1;Phldb1;Phldb1;Phldb1	FSDGLAATRTLQPPESPRLGRRGLDSMRELP	_TLQPPES(ph)PR_	2.60859	2.42757	2.93002	2.24696	2.51808	Up	S	445	2	___1	1	UID763	1.08495	1.24318	-1.44878	-1.05724
D3Z0X5	Phldb1;Phldb1;Phldb1;Phldb1;Phldb1	SPFREPPGTERVLTSSPSRQLVGRTFSDGLA	_VLTSS(ph)PSR_	3.69712	2.17375	3.81936	1.87122	2.93544	Up	S	420	2	___1	0.985731	UID764	1.54854	1.1133	-1.87456	-0.888702
D3Z357	Whsc1l1;Whsc1l1;Whsc1l1	SCTYRDTSDSDSRGLSDGQVGFGKQVDSPSA	_GLS(ph)DGQVGFGK_	0.340526	-1.6973	0.181804	-2.04252	-0.757748		S	669	2	___1	1	UID767	0.119024	-0.867489	-0.133053	0.866789
D3Z357	Whsc1l1;Whsc1l1;Whsc1l1	QSSTDLRRQSQRRHTSLEEEEPPPVKIAWKT	_HTS(ph)LEEEEPPPVK_	-0.531963	-2.71804	-1.34991	-0.854697	-1.1023		S	467	2	___1	0.999983	UID768	-0.252552	-1.38979	0.60027	0.333996
D3Z357	Whsc1l1;Whsc1l1;Whsc1l1	KTEISVRGQDRLIISSPSQRSEKPAQSASSP	_LIISS(ph)PSQR_	1.53778	3.60533	2.06676	2.50561	2.28618	Up	S	557	2	___1	0.994695	UID770	0.628914	1.84583	-1.03549	-1.17325
F8VQD1	Pbrm1;Pbrm1;Pbrm1	QQERERAAQQQQPSASPRAGTPVGALMGVVP	_AAQQQQPSAS(ph)PR_	1.86714	0.199308	0.838942	0.18095	0.519125		S	1468	2	___1	0.999994	UID774	0.769179	0.102994	-0.447662	-0.130539
F8VQD1	Pbrm1;Pbrm1;Pbrm1;Pbrm1;Pbrm1;Pbrm1;Pbrm1;Pbrm1;Pbrm1	DSSGTTGLSGLHRTYSQDCSFKNSMYHVGDY	_TYS(ph)QDCSFK_	NaN	-2.19277	-0.867185	-1.11275	-1.11275		S	963	2	___1	0.999996	UID775	NaN	-1.12102	0.369159	0.449746
P97496	Smarcc1;Smarcc1;Smarcc1	DGQQPEKAENKVENESDEGDKIQDRENEKNT	_VENES(ph)DEGDKIQDR_	-2.63499	-1.89243	-2.8729	-2.27961	-2.4573	Down	S	800	2	___1	1	UID776	-1.14819	-0.967335	1.32941	0.973134
P97496	Smarcc1;Smarcc1;Smarcc1;Smarcc1	RRDRKASANSRKRKPSPSPPPPTATESRKKS	_RKPS(ph)PS(ph)PPPPTATESR_	-2.684	-2.12491	-2.20152	-2.08544	-2.16322	Down	S	327	3	___1	1	UID777	-1.16906	-1.08629	1.00798	0.886043
P97496	Smarcc1;Smarcc1;Smarcc1;Smarcc1	DRKASANSRKRKPSPSPPPPTATESRKKSGK	_KPS(ph)PS(ph)PPPPTATESR_	-2.53002	-2.31362	-2.0717	-1.84372	-2.19266	Down	S	329	2	___1	1	UID778	-1.10349	-1.18285	0.945832	0.77762
P97496	Smarcc1;Smarcc1;Smarcc1	VLADTPSGLVPLHLRSPQVPAAQQMLNFPEK	_S(ph)PQVPAAQQM(ox)LNFPEK_	-2.39209	-1.31107	-1.87203	-1.44175	-1.65689		S	572	2	___1	1	UID780	-1.04475	-0.669855	0.850239	0.597317
D3Z1Y5	Arhgap22;Arhgap22	TSPPRLGSQTGPAATSPGKKMHTLPVWKSSF	_LGSQTGPAATS(ph)PGKK_	-0.367762	0.416734	-1.02047	2.28067	0.024486		S	259	2	___1	0.994385	UID781	-0.182622	0.214249	0.442545	-1.07236
Q99K90	Tab2;Tab2;Tab2	HHPPKSRVLGGNSATSPRVVVTQPNTKYTFK	_VLGGNSATS(ph)PR_	0.986881	1.33391	-0.924039	-2.22391	0.031421		S	450	2	___1	0.999942	UID783	0.394295	0.683562	0.396379	0.948152
O54916	Reps1;Reps1;Reps1;Reps1	TPLAPPPKPVRRRLKSEDELRPDVDEHTQKT	_LKS(ph)EDELRPDVDEHTQK_	1.24128	0.881709	0.735407	-0.907088	0.808558		S	708	4	___1	0.999999	UID784	0.502636	0.452174	-0.398094	0.357496
O54916	Reps1;Reps1;Reps1;Reps1;Reps2;Reps2;Reps2;Reps2	IRRNKETNTVLARLNSELQQQLKDVLEERIS	_LNS(ph)ELQQQLK_	-0.631394	0.285653	-0.890426	0.866312	-0.172871		S	766	2	___1	1	UID785	-0.294898	0.147176	0.380286	-0.437955
O54916	Reps1;Reps1;Reps1;Reps1;Reps1	RTVASAATANEIRRQSSSYEDPWKITDEQRQ	_RQS(ph)S(ph)SYEDPWK_	-0.800447	-0.471322	-1.11219	NaN	-0.800447		S	272	2	___1	0.992127	UID787	-0.366894	-0.240162	0.486457	#VALUE!
D3Z2R5	Sepn1	___MGQARPAARRPHSPDPGAQPAPPRRRAR	_RPHS(ph)PDPGAQPAPPR_	1.42599	1.00982	1.33291	1.60788	1.37945		S	13	2	___1	1	UID790	0.581303	0.517729	-0.684156	-0.770584
E9QM75	Tnip1;Tnip1;Tnip1;Tnip1	LMNSSCKEGLCGQPSSPKPEGAGKKGVAGQQ	_EGLCGQPSS(ph)PKPEGAGK_	-0.142725	0.829081	-0.844233	NaN	-0.142725		S	279	2	___1	0.960801	UID791	-0.0867831	0.425244	0.358171	#VALUE!
F8WIA1	Clip1;Clip1;Clip1;Clip1;Clip1;Clip2	SGLLTETSSRYARKISGTTALQEALKEKQQH;TGLLTETSSRYARKISGTTALQEALKEKQQH	_KIS(ph)GTTALQEALK_	-3.83086	-0.57919	-5.24115	0.319962	-2.20503		S	353	2	___1	1	UID792	-1.65749	-0.295358	2.46323	-0.192893
Q921C5-2	Bicd2;Bicd2	QGKAGRTSPEGRGRRSPVLLPKGLLATEVGR	_S(ph)PVLLPK_	0.581597	0.27315	0.331628	0.742121	0.456612		S	578	2	___1	1	UID796	0.221692	0.140779	-0.204782	-0.38225
D3Z3A8	Myo9a;Myo9a	ILEKTMRLEQRDWNESPVRVWVNTFKVFLDE	_DWNES(ph)PVR_	1	-0.15075	0.507314	-0.0108484	0.248233		S	2021	2	___1	1	UID799	0.399882	-0.0761282	-0.288893	-0.0445087
D3Z3A8	Myo9a;Myo9a	SKESPDKQQERGRRQSGTDLQEDVIVRQRPK	_RQS(ph)GTDLQEDVIVR_	-2.42136	-2.15277	-0.610154	1.57415	-1.38146		S	1243	2	___1	0.999982	UID801	-1.05721	-1.10055	0.246104	-0.755454
D3Z3A8	Myo9a;Myo9a	GTDLQEDVIVRQRPKSLEDLHQKKVGRAKRE	_S(ph)LEDLHQK_	2.58873	1.36238	3.16198	1.12852	1.97555		S	1259	2	___1	1	UID802	1.07649	0.69813	-1.55983	-0.555566
D3Z4V2	Fip1l1;Fip1l1;Fip1l1;Fip1l1	SEKEAALPSTKAEFTSPPSLFKTGLPPSRNS	_AEFTS(ph)PPSLFK_	-0.690715	0.719037	0.0325301	-0.0981546	-0.0328123		S	258	2	___1	0.999658	UID803	-0.320162	0.368936	-0.0615863	-0.00534785
D3Z4V2	Fip1l1;Fip1l1;Fip1l1;Fip1l1	RERERTRERERERDHSPTPSVFNSDEERYRY	_DHS(ph)PTPSVFNSDEER_	-0.839639	-0.571658	-1.41461	0.324782	-0.705649		S	493	2	___1	1	UID804	-0.383586	-0.291504	0.631244	-0.195054
D3Z3Q3	Smtn;Smtn	TRLGSVTHVTTFSHASPGNRGGCNFKMEPDP	_LGSVTHVTTFSHAS(ph)PGNR_	1.65533	2.59553	1.84314	NaN	1.84314		S	532	3	___1	0.995802	UID808	0.678973	1.32912	-0.928429	#VALUE!
G3X9X7	Tnk2;Tnk2;Tnk2;Tnk2;Tnk2	RVPIPPRPTRPRVELSPAPSGEEETSRWPGP	_VELS(ph)PAPSGEEETSR_	-0.0146907	NaN	-0.17991	0.738811	-0.0146907		S	772	2	___1	1	UID809	-0.0322559	NaN	0.040121	-0.380765
G3X9X7	Tnk2;Tnk2;Tnk2;Tnk2;Tnk2	APSGEEETSRWPGPASPPRVPPREPLSPQGS	_WPGPAS(ph)PPR_	-1.01248	0.278261	-0.790389	0.244601	-0.272894		S	789	2	___1	1	UID810	-0.457197	0.143393	0.332393	-0.15909
D3Z4U0	Zranb2;Zranb2;Zranb2;Zranb2	GFNERENVEYIEREESDGEYDEFGRKKKKYR	_EES(ph)DGEYDEFGR_	-0.922717	-0.971304	-0.613456	-0.373655	-0.768087		S	130	2	___1	1	UID812	-0.418967	-0.496	0.247684	0.118227
D3Z4U0	Zranb2;Zranb2;Zranb2;Zranb2	AVGPASILKEVEDKESEGEEEDEDEDLSKYK	_EVEDKES(ph)EGEEEDEDEDLSK_	-0.803681	-0.790949	-1.04938	-0.381942	-0.797315		S	163	3	___1	1	UID813	-0.368272	-0.403714	0.456386	0.121944
D3Z4U0	Zranb2;Zranb2;Zranb2;Zranb2	EDEDDADLSKYNLDASEEEDSNKKKSNRRSR	_YNLDAS(ph)EEEDSNKK_	-0.839949	-0.730762	-0.556319	0.311664	-0.643541		S	198	2	___1	1	UID816	-0.383718	-0.372916	0.22033	-0.18917
D3Z5F7	Gm20521;Pabpn1;Pabpn1;Pabpn1;Pabpn1;Pabpn1	KLKELQNEVEKQMNMSPPPGNAGPVIMSLEE	_QMNMS(ph)PPPGNAGPVIMSLEEK_	-0.448573	1.48081	0.463057	0.904444	0.683751		S	177	2	___1	1	UID820	-0.217038	0.75873	-0.267705	-0.45506
D3Z5I1	Zc3hav1;Zc3hav1;Zc3hav1	GLFSRNRSDSSTSRTSAAGFPLVAAQRNEAG	_TS(ph)AAGFPLVAAQR_	-1.66545	-0.748599	-1.2162	-1.91791	-1.44083		S	350	2	___1	0.828569	UID822	-0.735283	-0.382043	0.536252	0.810895
Q9CXK9	Rbm33;Rbm33	SRSSQGNTDAKAKPLSPEAQPKEEAKPEAEF	_AKPLS(ph)PEAQPK_	-2.19836	-0.970827	0.320189	0.828325	-0.325319		S	816	2	___1	1	UID823	-0.962238	-0.495756	-0.199305	-0.420916
Q9CXK9	Rbm33;Rbm33	HRPALLPTQPSVVAHSPRLIPPPQPQPPPPP	_PALLPTQPSVVAHS(ph)PR_	-0.614935	-1.73193	-0.488834	-1.34507	-0.980002		S	357	3	___1	0.999309	UID824	-0.287888	-0.885206	0.188021	0.55395
Q9CXK9	Rbm33;Rbm33	KVLQVKPMDMEETPHSPQAARVTSLQGRPQD	_PMDMEETPHS(ph)PQAAR_	0.0329511	0.0977432	0.160992	0.671715	0.129368		S	1002	3	___1	0.999973	UID825	-0.0119662	0.051024	-0.123088	-0.35067
D3Z5J3	Sorbs1;Sorbs1;Sorbs1;Sorbs1;Sorbs1	RAGEQDPVPTPAELTSPGRASERRAKDASRR	_AGEQDPVPTPAELTS(ph)PGR_	3.85306	6.02883	3.43334	NaN	3.85306	Up	S	310	2	___1	0.999872	UID826	1.61495	3.08592	-1.68975	#VALUE!
D3Z5J3	Sorbs1;Sorbs1;Sorbs1	GKSSVLTNEKMSRDISPEEIDLKNEPWYKFF	_DIS(ph)PEEIDLK_	NaN	4.51039	1.14512	5.50813	4.51039		S	516	2	___1	1	UID827	NaN	2.30894	-0.594247	-2.52002
Q9Z1T6	Pikfyve;Pikfyve	VQEDAGKSPARNRSASITNLSLDRSGSPMVP	_SAS(ph)ITNLSLDR_	-1.04205	-1.62188	-1.68819	-1.91791	-1.65504		S	307	2	___1	0.998804	UID829	-0.469789	-0.828896	0.762221	0.810895
D3Z5N6	Dpf2;Dpf2;Dpf2	PLEKRGAPDPRVDDDSLGEFPVSNSRARKRI	_VDDDS(ph)LGEFPVSNSR_	-0.96061	-1.87123	-0.866251	-3.03916	-1.41592		S	142	2	___1	1	UID830	-0.435105	-0.956488	0.368713	1.31383
D3Z5N8	Plekhg2;Plekhg2;Plekhg2;Plekhg2	SQGHWSSSAPTSRAPSPPPQPQPPAPPARRL	_APS(ph)PPPQPQPPAPPAR_	-1.83633	-1.00825	-1.04388	-0.612036	-1.02607		S	1302	2	___1	1	UID831	-0.808058	-0.514903	0.453755	0.225152
E9QKQ3	2310008H09Rik;Tsg118;2310008H09Rik;2310008H09Rik;2310008H09Rik	KSLSKAASQGSGLKTSPDPKHAKEVSKAGRK	_AASQGSGLKTS(ph)PDPK_	0.183472	0.179814	0.345273	-1.27531	0.181643		S	194	2	___1	0.955714	UID832	0.0521377	0.0930192	-0.211314	0.522658
D3Z656	Synj1;Synj1	LSVLAVSKAQPSVQISPVLTPDPKMLIQLPS	_AQPSVQIS(ph)PVLTPDPK_	-2.59692	-1.17141	-2.58101	-0.224452	-1.87621		S	1383	2	___1	0.999998	UID833	-1.13198	-0.598391	1.18967	0.0513025
D3Z656	Synj1;Synj1;Synj1;Synj1;Synj1;Synj1	SPGTARKDNIGRNQPSPQAGLAGPGPAGYGA	_NQPS(ph)PQAGLAGPGPAGYGAAR_	-0.863944	-0.824682	1.41757	0.309428	-0.257627		S	1215	2	___1	1	UID834	-0.393937	-0.420974	-0.724683	-0.188167
D3Z6C3	Gm10119;Rps3a;Gm9000	KSELGKLMELHGEGGSSGKAAGDETGAKVER	_LMELHGEGGS(ph)SGK_	-0.143768	-1.0037	-0.370413	-1.00913	-0.687056		S	237	2	___1	0.997755	UID835	-0.0872275	-0.512575	0.131326	0.403268
D3Z6C3	Gm10119;Rps3a;Gm9000	SELGKLMELHGEGGSSGKAAGDETGAKVERA	_LMELHGEGGSS(ph)GK_	-0.166842	-1.00305	-0.477704	-1.10308	-0.740377		S	238	3	___1	0.964744	UID836	-0.0970543	-0.512246	0.182692	0.445409
Q5EBH1	Rassf5;Rassf5	QLDCRQKGGPALDRRSPESTLTPTLNQNVCK	_S(ph)PESTLTPTLNQNVCK_	1.47678	0.475657	1.48984	1.54346	1.48331		S	177	2	___1	0.999979	UID837	0.602932	0.2444	-0.759283	-0.741686
Q91W40	Klc3;Klc3	RGEGMAGAAGMKRAMSLNMLNVDGPRAARTQ	_AM(ox)S(ph)LNM(ox)LNVDGPR_	-1.96157	-2.8114	-1.78194	1.98579	-1.87176		S	467	2	___1	1	UID838	-0.861395	-1.43756	0.807108	-0.940091
Q91W40	Klc3;Klc3	LSTRHLSEAPRTLSISTQDLSPR________	_TLSIS(ph)TQDLSPR_	-1.50509	-2.47253	-0.966325	1.52656	-1.23571		S	501	2	___1	0.895975	UID839	-0.666989	-1.26417	0.416624	-0.734107
Q9DB90	Smg9;1500002O20Rik	ERDYIAPWERERRDGSEDPSTNVMQKTPIIL	_DGS(ph)EDPSTNVM(ox)QK_	3.50988	0.52824	1.96695	-0.325288	1.2476		S	53	2	___1	1	UID840	1.46879	0.271306	-0.987703	0.0965318
Q9DB90	Smg9;1500002O20Rik	RRRWKEPGSSGPQNLSGPGGRERDYIAPWER	_EPGSSGPQNLS(ph)GPGGR_	2.19284	1.64915	3.23036	1.2475	1.921		S	32	2	___1	0.999978	UID841	0.90789	0.844868	-1.59257	-0.608936
Q9DB90	Smg9;1500002O20Rik	_________MSESGHSQPGLYGIERRRRWKE	_(ac)SESGHS(ph)QPGLYGIER_	-0.258546	NaN	1.65312	1.40601	1.40601		S	7	2	___1	0.996714	UID843	-0.136109	NaN	-0.837455	-0.680035
Q80U62	Kiaa0226;1700021K19Rik	EEGRQSQAGSVLRRSSFSEGQTAPVASGTKK	_RSS(ph)FSEGQTAPVASGTK_	-0.486386	-1.53849	-1.33137	-0.017807	-0.908878		S	390	2	___1	0.999888	UID846	-0.233142	-0.786224	0.591392	-0.0413874
D3Z7D3	Dip2a;Dip2a	PQKSRATNSRDERFRSDVHTEAVQAALAKYK	_FRS(ph)DVHTEAVQAALAK_	NaN	-1.44613	2.30664	-3.11801	-1.44613		S	93	3	___1	0.999749	UID848	NaN	-0.738963	-1.15034	1.3492
D3Z7I0	Gtf3c2;Gtf3c2;Gtf3c2;Gtf3c2	DLLLLKLSKGLDQPESPHPKRPPEDFETPSG	_GLDQPES(ph)PHPK_	0.982239	0.838305	1.55589	1.74	1.26906		S	163	2	___1	1	UID849	0.392317	0.429964	-0.790909	-0.829844
D3Z7P0	Bre;Bre;Bre;Bre	______________MSPEIALNRISPMLSPF	_(ac)M(ox)S(ph)PEIALNR_	-1.40352	-1.46335	NaN	-0.26302	-1.40352		S	2	2	___1	1	UID850	-0.623732	-0.747778	#VALUE!	0.068602
D3Z7Q5	Pdcd5;Pdcd5	EKKTTVKFNRRKVMDSDEDDADY________	_KVMDS(ph)DEDDADY_	-0.0314291	-0.622143	-0.209946	-0.493769	-0.351857		S	119	2	___1	1	UID851	-0.0393845	-0.317337	0.0545012	0.172103
O35216	Cenpa;Cenpa;Cenpa	_MGPRRKPQTPRRRPSSPAPGPSRQSSSVGS	_RPS(ph)SPAPGPSR_	-1.90142	-1.89574	-1.57579	-1.64622	-1.77098		S	15	2	___1	0.998204	UID852	-0.83578	-0.969028	0.708408	0.689031
O35216	Cenpa;Cenpa;Cenpa	MGPRRKPQTPRRRPSSPAPGPSRQSSSVGSQ	_RPSS(ph)PAPGPSR_	-1.47718	-2.55088	-1.59014	-1.82434	-1.70724		S	16	2	___1	0.968513	UID853	-0.655103	-1.30426	0.715278	0.768925
Q8BX51	Sgcz;Sgcz	____________MDRSTDLDIQELKMTREQY	_DRS(ph)TDLDIQELK_	0.563829	NaN	0.535758	0.9475	0.563829		S	4	2	___1	0.995164	UID854	0.214125	NaN	-0.302511	-0.474372
Q80XP8	Fam76b;Fam76b	HHHRHSSGHHKVSSLSPEQEQGLWKQSHKSS	_VSS(ph)LS(ph)PEQEQGLWK_	-0.184461	0.493688	-0.145126	0.9475	0.174281		S	193	2	___1	0.999995	UID855	-0.104558	0.253626	0.0234682	-0.474372
E9PW44	Ythdc1;Ythdc1;Ythdc1;Ythdc1	GSDEKKKERKRARGISPIVFDRSGSSASESY	_GIS(ph)PIVFDR_	-0.500791	-0.454389	-0.488305	-0.3337	-0.471347		S	309	2	___1	1	UID856	-0.239277	-0.231498	0.187768	0.100305
Q6P5E8	Dgkq;Dgkq	PGARTWPGSGSPRLGSPAGSPVLGISGRTRP	_LGS(ph)PAGS(ph)PVLGISGR_	NaN	-2.02395	1.51817	0.573604	0.573604		S	22	2	___1	1	UID860	NaN	-1.03463	-0.77285	-0.306662
Q6P5E8	Dgkq;Dgkq	TWPGSGSPRLGSPAGSPVLGISGRTRPGSGP	_LGS(ph)PAGS(ph)PVLGISGR_	-3.30868	-2.3936	2.03286	NaN	-2.3936		S	26	2	___1	1	UID861	-1.4351	-1.22378	-1.01926	#VALUE!
Q8BYJ6	Tbc1d4;Tbc1d4;Tbc1d4;Tbc1d4;Tbc1d4	NIFSRGANRMRGRLGSMDSFERANSLASEKD	_LGS(ph)MDSFER_	2.78045	-3.06185	NaN	-3.4961	-3.06185		S	595	2	___1	0.999997	UID864	1.15814	-1.56572	#VALUE!	1.51879
Q8R3P9	Ankrd32;Ankrd32	RVLEAGKANVILPKNSPSGITHVIASNARIS	_NS(ph)PSGITHVIASNAR_	-3.57658	-3.05701	-2.74528	-3.67404	-3.31679	Down	S	159	2	___1	0.998589	UID867	-1.5492	-1.56324	1.26831	1.5986
E0CXB9	Ctnna2;Ctnna2;Ctnna1	DSDFEQEDYDVRSRTSVQTEDDQLIAGQSAR;DSDFETEDFDVRSRTSVQTEDDQLIAGQSAR	_S(ph)RTS(ph)VQTEDDQLIAGQSAR_	-0.102634	-0.38462	0.545437	NaN	-0.102634		S	655	2	___1	0.999523	UID869	-0.0697092	-0.195798	-0.307144	#VALUE!
E0CXC2	Rnf8;Ftsjd2;Ftsjd2	SVNHAAKASATSLSGSDSETEGKQPCSDDFK;VLIRERRASATSLSGSDSETEGKQPCSDDFK	_ASATSLSGS(ph)DS(ph)ETEGK_	-2.43832	-3.60912	-1.90925	-3.04897	-2.74364	Down	S	52	2	___1	0.998136	UID870	-1.06443	-1.84575	0.868055	1.31823
E0CXC2	Rnf8;Ftsjd2;Ftsjd2	IRERRASATSLSGSDSETEGKQPCSDDFKDA;NHAAKASATSLSGSDSETEGKQPCSDDFKDA	_ASATSLSGS(ph)DS(ph)ETEGK_	-1.51889	NaN	-1.97053	-3.4477	-1.97053		S	54	2	___1	0.998525	UID871	-0.672864	NaN	0.897395	1.49708
Q9CQ73	Pkp2;Pkp2;Pkp2	VYKLHVVENDFVGRQSPVTRDYDMLKAGMTA	_LHVVENDFVGRQS(ph)PVTR_	NaN	-0.21968	2.84575	-1.72135	-0.21968		S	102	3	___1	0.994612	UID874	NaN	-0.111399	-1.40844	0.722728
E9Q4S1	Pde8b;Pde8b;Pde8b;Pde8b;Pde8b;Pde8b;Pde8b;Pde8b	SDLVGGLMTDGLRRLSGNEYVFTKNVHHSHS	_RLS(ph)GNEYVFTK_	3.79809	3.64373	NaN	1.05657	3.64373		S	497	2	___1	1	UID875	1.59154	1.86548	#VALUE!	-0.523297
Q08122-4	Tle3;Tle3;Tle3;Tle3;Tle3;Tle3;Tle3;Tle3;Tle3;Tle3	ELDHRERESSTNNSVSPSESLRASEKHRGSA	_ESSTNNSVS(ph)PSESLR_	1.33675	2.16134	1.50872	0.129326	1.42274		S	213	2	___1	0.991176	UID878	0.543298	1.10695	-0.768322	-0.107384
Q08122-4	Tle3;Tle3;Tle3;Tle3;Tle3;Tle3;Tle3;Tle3;Tle3;Tle3	VSPSESLRASEKHRGSADYSMEAKKRKAEEK	_HRGS(ph)ADYSMEAK_	1.81365	2.95831	NaN	2.2775	2.2775		S	227	3	___1	0.999674	UID879	0.746399	1.51475	#VALUE!	-1.07094
Q08775	Runx2;Runx2;Runx2;Runx2	GVPPQNPRPSLNSAPSPFNPQGQSQITDPRQ	_PSLNSAPS(ph)PFNPQGQSQITDPR_	-0.112104	-0.200768	1.64161	0.774945	0.331421		S	361	3	___1	0.999197	UID881	-0.0737425	-0.101722	-0.831948	-0.396973
Q9D0U6	Maf1;Maf1;Maf1	SPPQTSGLSPSRLSKSQGGEDESPLSDKCSR	_S(ph)QGGEDESPLSDK_	1.68167	1.81511	2.20678	2.53534	2.01094		S	75	2	___1	1	UID882	0.690194	0.929791	-1.10253	-1.18659
Q8C6G8	Wdr26;Wdr26;Wdr26	ATPELGSSLKKKKRLSQSDEDVIRLIGQHLN	_RLS(ph)QSDEDVIR_	0.11682	-0.329838	-2.42136	-0.600734	-0.465286		S	101	2	___1	0.999997	UID883	0.0237522	-0.167766	1.11323	0.220082
Q8C6G8	Wdr26;Wdr26;Wdr26	PELGSSLKKKKRLSQSDEDVIRLIGQHLNGL	_LSQS(ph)DEDVIR_	0.105137	-1.47826	NaN	-1.32176	-1.32176		S	103	2	___1	0.999901	UID884	0.0187766	-0.755405	#VALUE!	0.543496
E0CYH7	Filip1l;Filip1l;Filip1l	GSPYMQAVAGPMRPASPSAPLQDNRTQGLTN	_PAS(ph)PSAPLQDNR_	0.265461	1.40447	0.404034	-0.180385	0.334747		S	1080	2	___1	1	UID886	0.0870554	0.719665	-0.239447	0.0315363
E0CYH7	Filip1l;Filip1l;Filip1l	HFSKSLRPSLNERRISDPQVFSKEVQTEAAD	_RIS(ph)DPQVFSK_	-2.93066	-1.49856	-3.67548	-1.61897	-2.27482		S	789	2	___1	1	UID887	-1.27411	-0.765793	1.71365	0.676809
E9QAK8	AW554918;Kiaa1328;AW554918;AW554918	VARPQNYGQTKARPKSANQVSESFTELRNNS	_S(ph)ANQVSESFTELR_	0.869397	NaN	1.07595	-0.270067	0.869397		S	228	2	___1	1	UID888	0.34426	NaN	-0.561132	0.0717627
E2JF22	Piezo1;Fam38a;Fam38a;Fam38a	SQELLANARTRMRTASELLLDRRLHIPELEE	_TAS(ph)ELLLDR_	0.986366	0.587419	1.36118	1.12663	1.0565		S	1646	2	___1	0.999999	UID889	0.394075	0.301588	-0.697687	-0.554718
E9PU87	Sik3;Sik3;Sik3;Sik3;Sik3	TLQLLNGMGPLGRRASDGGANIQLHAQQLLK	_RAS(ph)DGGANIQLHAQQLLK_	0.873398	0.0134915	-0.417096	0.449446	0.231469		S	551	3	___1	1	UID890	0.345964	0.00791302	0.153676	-0.250972
E9PU87	Sik3;Sik3;Sik3;Sik3	TLHLPTERFSPVRRFSDGAASIQAFKAHLEK	_RFS(ph)DGAASIQAFK_	-2.03492	-2.31323	-3.40849	-1.41099	-2.17408	Down	S	674	2	___1	1	UID891	-0.892633	-1.18266	1.58583	0.583519
E9PU87	Sik3;Sik3;Sik3;Sik3	PALLTHQLQRLRIQPSSPPPNHPSNHLFRQP	_IQPS(ph)SPPPNHPSNHLFR_	-0.234397	NaN	-0.467598	1.06996	-0.234397		S	778	2	___1	0.838542	UID892	-0.125825	NaN	0.177854	-0.529302
E9PU87	Sik3;Sik3;Sik3;Sik3	ALLTHQLQRLRIQPSSPPPNHPSNHLFRQPS	_IQPSS(ph)PPPNHPSNHLFR_	-0.368224	0.513484	-0.540759	1.04504	0.07263		S	779	3	___1	0.885897	UID893	-0.182819	0.263756	0.212881	-0.518122
E9PU87	Sik3;Sik3;Sik3;Sik3	GHQPTATTFSRNKVPSRESVLGNCLERSSPG	_NKVPS(ph)RESVLGNCLER_	-0.0823234	1.02867	NaN	0.361703	0.361703		S	1218	3	___1	0.995594	UID894	-0.0610594	0.527371	#VALUE!	-0.211615
E9PU87	Sik3;Sik3;Sik3	MAPFSYGHRPLSKQLSADSAEAHSLNMNRFS	_QLS(ph)ADSAEAHSLNMNR_	-0.354371	NaN	-0.857838	0.552431	-0.354371		S	914	2	___1	0.999819	UID895	-0.176919	NaN	0.364685	-0.297165
E9PUA3	Iqsec1;Iqsec1	RMSRRIVLSNMRMQFSFEGPEKVHSSYFEGK	_M(ox)QFS(ph)FEGPEK_	1.7875	3.41101	2.01155	1.68428	1.89953		S	165	2	___1	1	UID897	0.735262	1.7464	-1.00906	-0.804854
E9PUA3	Iqsec1;Iqsec1	EQTLSKQTYHKETRNSWDSPAFSNDVIRKRH	_NS(ph)WDSPAFSNDVIR_	-0.104376	0.581694	1.41055	0.357422	0.469558		S	496	2	___1	1	UID898	-0.0704514	0.298658	-0.721325	-0.209695
E9PUH7	Nfix;Nfix;Nfix	SGKLDFCSALSSQGSSPRMAFTHHPLPVLAG	_LDFCSALSSQGSS(ph)PR_	1.75458	2.1826	2.48634	3.7476	2.33447	Up	S	333	2	___1	0.999479	UID901	0.721241	1.11783	-1.23637	-1.73034
E9PUH7	Nfix;Nfix;Nfix	MESPVDDVFYPGTGRSPAAGSSQSSGWPNDV	_S(ph)PAAGSSQSSGWPNDVDAGPASLK_	NaN	2.2755	2.1848	1.68822	2.1848		S	293	2	___1	0.999953	UID903	NaN	1.16537	-1.092	-0.806619
E9PUI5	Fnbp1l;Fnbp1l;Fnbp1l	SEVEGKTGIRGDRRHSSDINHLVTQGRESPE	_RHS(ph)SDINHLVTQGR_	-1.74239	NaN	-2.65629	-0.206399	-1.74239		S	488	3	___1	0.950928	UID905	-0.768052	NaN	1.22571	0.0432046
E9PUI5	Fnbp1l;Fnbp1l;Fnbp1l	EVEGKTGIRGDRRHSSDINHLVTQGRESPEG	_RHSS(ph)DINHLVTQGR_	-1.91639	-1.55145	-2.76523	-0.615061	-1.73392		S	489	4	___1	0.92214	UID906	-0.842154	-0.792857	1.27787	0.226509
E9PUI5	Fnbp1l;Fnbp1l;Fnbp1l	DFPFEDYSQHIYRTISDGTISAAKQESGKMD	_TIS(ph)DGTISAAK_	0.457936	-0.9558	-0.154303	-0.498048	-0.326176		S	295	2	___1	0.999998	UID907	0.169027	-0.488067	0.0278618	0.174023
E9PUM4	Tln2;Tln2;Tln1	WQLKNSAKVMVTNVTSLLKTVKAVEDEATKG;YQLKGAAKVMVTNVTSLLKTVKAVEDEATRG	_VM(ox)VTNVTS(ph)LLK_	-0.00922175	-0.272281	-0.0820321	1.57095	-0.0456269		S	2127	2	___1	0.978661	UID908	-0.0299268	-0.138315	-0.00673868	-0.754018
Q9Z138	Ror2;Ror2	ASASTPQRRQLMASPSQDMEMPLISQHKQAK	_QLMASPS(ph)QDMEMPLISQHK_	2.43931	2.72268	1.96521	2.13877	2.28904	Up	S	449	3	___1	0.977602	UID909	1.01285	1.39418	-0.986874	-1.00871
E9PUQ5	Golga2;Golga2;Golga2;Golga2	VPAGAKKKKKIKNGHSPERPTASDCQSPENI	_NGHS(ph)PERPTASDCQSPENIK_	-0.70878	0.59587	NaN	1.90823	0.59587		S	55	3	___1	0.99987	UID910	-0.327855	0.305912	#VALUE!	-0.905305
E9PUQ8	Dgkd	PEAEPGSPQKLIRKVSTSGQIRQKTILKEGM	_KVS(ph)TSGQIR_	1.22882	-0.455614	1.2594	1.63998	1.24411		S	44	2	___1	0.997362	UID911	0.497331	-0.232125	-0.64896	-0.78498
Q8K4R9	Dlgap5;Dlgap5	EGRELGNIHETSQDLSPEKASSKTRSVKMVL	_ELGNIHETSQDLS(ph)PEK_	NaN	0.906331	0.738983	0.434744	0.738983		S	70	2	___1	0.999942	UID913	NaN	0.464773	-0.399806	-0.244377
Q8K4R9	Dlgap5;Dlgap5;Dlgap5	FQPPCGLKSYQVAPLSPRSANAFLTPNCDWN	_SYQVAPLS(ph)PR_	-0.0632933	1.52971	0.817687	0.213472	0.51558		S	328	2	___1	1	UID914	-0.0529548	0.78375	-0.437486	-0.145127
E9PUU4	Gemin5	DEPSQEAERAPSQPPSPTREERNAPVSLPEL	_APSQPPS(ph)PTR_	-4.73451	-3.14571	-2.50868	-0.332499	-2.82719	Down	S	1414	2	___1	0.999148	UID915	-2.04234	-1.60863	1.15504	0.0997664
E9PV82	Fam53a;Fam53a	GPPAAPPTKRHCRSLSEPEELARCRSPWRPG	_SLS(ph)EPEELAR_	1.53428	0.773311	NaN	-1.33058	0.773311		S	119	2	___1	0.99998	UID917	0.62742	0.396707	#VALUE!	0.54745
Q61026	Ncoa2;Ncoa2	LKEKHKILHRLLQDSSSPVDLAKLTAEATGK	_LLQDSS(ph)SPVDLAK_	3.24445	1.35263	2.26975	2.1254	2.19758	Up	S	698	2	___1	0.836177	UID918	1.35575	0.693141	-1.13267	-1.00271
Q61026	Ncoa2;Ncoa2	KEKHKILHRLLQDSSSPVDLAKLTAEATGKE	_LLQDSSS(ph)PVDLAK_	2.33896	1.64726	2.46357	2.18256	2.26076	Up	S	699	2	___1	0.987107	UID919	0.970117	0.843903	-1.22546	-1.02835
Q61026	Ncoa2;Ncoa2	SSLASPDLKMGNLQNSPVNMNPPPLSKMGSL	_MGNLQNS(ph)PVNMNPPPLSK_	NaN	0.956145	0.817442	0.968976	0.956145		S	565	2	___1	1	UID920	NaN	0.490262	-0.437369	-0.484005
E9PVA2	Rrp8;Rrp8	GKKRKGKCQKQAPSISDSEGKEIRRKCHRQA	_QAPSIS(ph)DSEGK_	-1.35728	-0.975363	-0.839763	-1.14858	-1.06197		S	151	2	___1	0.997901	UID921	-0.604038	-0.498077	0.356031	0.465818
E9PVC5	Eif4g1;Eif4g1;Eif4g1;Eif4g1	RGRDPVKREATLPPVSPPKAALSVDEVEKKS	_EATLPPVS(ph)PPK_	-2.82563	-1.55644	-1.38214	-0.391091	-1.46929		S	1225	2	___1	1	UID923	-1.22938	-0.795409	0.615699	0.126048
E9PVC5	Eif4g1;Eif4g1;Eif4g1;Eif4g1	RPIDTSRLTKITKPGSIDSNNQLFAPGGRLS	_ITKPGS(ph)IDSNNQLFAPGGR_	0.870198	4.40624	0.95469	3.7869	2.3708		S	1075	2	___1	1	UID925	0.344601	2.25565	-0.503077	-1.74797
E9PVC5	Eif4g1;Eif4g1;Eif4g1;Eif4g1	DTSRLTKITKPGSIDSNNQLFAPGGRLSWGK	_ITKPGSIDS(ph)NNQLFAPGGR_	1.06686	4.46421	0.720474	3.66926	2.36806		S	1078	3	___1	0.905536	UID926	0.428357	2.28531	-0.390945	-1.69521
E9PVC5	Eif4g1;Eif4g1;Eif4g1;Eif4g1	RGDRLDRARTPATKRSFSKEVEERSRERPSQ	_S(ph)FS(ph)KEVEER_	0.343955	3.60815	-0.521196	4.84962	1.97605		S	1181	2	___1	1	UID927	0.120485	1.84728	0.203514	-2.22465
E9PVC5	Eif4g1;Eif4g1;Eif4g1;Eif4g1	DRLDRARTPATKRSFSKEVEERSRERPSQPE	_S(ph)FS(ph)KEVEER_	-0.42859	-2.25665	-0.306742	-2.93007	-1.34262		S	1183	2	___1	1	UID928	-0.208528	-1.1537	0.100843	1.2649
E9PVC5	Eif4g1;Eif4g1;Eif4g1;Eif4g1	RSFSKEVEERSRERPSQPEGLRKAASLTEDR	_SRERPS(ph)QPEGLR_	-0.551593	-0.852144	0.330447	-1.71471	-0.701869		S	1195	2	___1	0.999876	UID930	-0.260912	-0.435027	-0.204216	0.719753
E9PVG7	Map4k4;Map4k4;Map4k4	GLRPEAIRQDPTRKGSVVNVNPTNTRPQSDT	_KGS(ph)VVNVNPTNTR_	-5.40442	-4.24496	-5.71419	-3.01604	-4.82469	Down	S	949	2	___1	1	UID932	-2.32764	-2.17111	2.6897	1.30346
E9PVG7	Map4k4;Map4k4;Map4k4	PVRTTSRSPVLSRRDSPLQGGGQQNSQAGQR	_RDS(ph)PLQGGGQQNSQAGQR_	1.17219	0.799955	1.19651	1.10126	1.13672		S	684	2	___1	1	UID933	0.473215	0.410341	-0.61885	-0.543341
E9PVG7	Map4k4;Map4k4;Map4k4	LASLKNNVSPVSRSHSFSDPSPKFAHHHLRS	_SHS(ph)FSDPSPK_	0.472968	0.112942	0.487536	-0.497478	0.292955		S	611	2	___1	0.999899	UID934	0.175429	0.0588013	-0.279424	0.173767
E9PVG7	Map4k4;Map4k4;Map4k4	SLKNNVSPVSRSHSFSDPSPKFAHHHLRSQD	_SHSFS(ph)DPSPK_	0.594065	0.351831	0.637233	NaN	0.594065		S	613	2	___1	0.93354	UID935	0.227002	0.181039	-0.351093	#VALUE!
E9PVX6	Mki67	HSPAVLKTIIKERPQSPGKQESPGITPPRTN	_ERPQS(ph)PGKQESPGITPPR_	1.18826	0.813078	2.77366	-1.05909	1.00067		S	517	3	___1	0.999871	UID936	0.480058	0.417056	-1.37393	0.425674
E9PVX6	Mki67	QQLKDEDSRVTGRRHSVNLDEGESAQAVHKT	_RHS(ph)VNLDEGESAQAVHK_	-0.85723	0.40992	-0.51176	-1.33541	-0.684495		S	337	4	___1	1	UID938	-0.391077	0.210763	0.198997	0.54962
E9PVX6	Mki67	PVPEKKRAASSKRHVSPEPVKMKHLKIVSNK	_RHVS(ph)PEPVK_	1.48702	NaN	2.65137	1.29648	1.48702		S	2980	3	___1	1	UID939	0.607295	NaN	-1.31538	-0.630908
E9PVX6	Mki67	FMETPKQKLDFAENSSGSKRRSRTSKNRSQP	_LDFAENSS(ph)GSK_	2.32023	2.39282	2.88002	1.15176	2.35652	Up	S	2255	2	___1	0.930295	UID941	0.962142	1.2254	-1.42484	-0.565994
E9PVX6	Mki67	ETPKQKLDFAENSSGSKRRSRTSKNRSQPLE	_LDFAENSSGS(ph)K_	1.86853	NaN	2.58162	1.24069	1.86853		S	2257	2	___1	0.814674	UID942	0.769772	NaN	-1.28198	-0.605881
E9PVX6	Mki67	ETPKQKLDFAGNSSGSKRRSRTSKNRSQPLE	_LDFAGNSSGS(ph)K_	1.67957	NaN	2.38168	1.7495	1.7495		S	1189	2	___1	0.931968	UID945	0.689299	NaN	-1.18626	-0.834107
E9PVX6	Mki67	AFMETPKQKLDFTGNSSGHKRRPQTPKIRAQ	_LDFTGNS(ph)SGHK_	2.43712	0.896713	2.82176	1.41354	1.92533		S	2016	2	___1	0.843849	UID946	1.01192	0.459851	-1.39695	-0.683414
E9PVX6	Mki67	FMETPKQKLDFTGNSSGHKRRPQTPKIRAQP	_LDFTGNSS(ph)GHK_	2.19068	1.70941	2.81994	0.828755	1.95005		S	2017	3	___1	0.938649	UID947	0.906968	0.875701	-1.39608	-0.42111
E9PVX6	Mki67	NGPLVVVKTKKMFFNSPQPESAITRKSRERQ	_MFFNS(ph)PQPESAITR_	1.07566	1.68084	2.11533	2.69026	1.89809		S	1469	2	___1	1	UID948	0.432104	0.861082	-1.05874	-1.25608
E9PVX6	Mki67	RSQHGILQMICSKRRSGASEANLIVAKSWAD	_S(ph)GASEANLIVAK_	1.63644	2.84639	2.36166	NaN	2.36166		S	588	2	___1	0.999794	UID949	0.670931	1.45749	-1.17667	#VALUE!
E9PVX6	Mki67	ANDSLTTGISTMLARSPQLGPVRTQINKKSL	_S(ph)PQLGPVR_	1.59254	2.75213	2.65505	1.8045	2.22978		S	1587	2	___1	1	UID951	0.652234	1.40926	-1.31714	-0.858777
E9PW43	Gm10320;Sec61b	RKNASCGTRSAGRTTSAGTGGMWRFYTEDSP;RKNASCGTRSTGRTTSAGTGGMWRFYTEDSP	_TTS(ph)AGTGGMWR_	-3.64437	-0.505967	-2.87601	-3.05606	-2.96603	Down	S	49	2	___1	0.999983	UID953	-1.57807	-0.25789	1.3309	1.32141
E9PWE8	Dpysl3	RRGPGREESREPAPESPKPAGVEIRSATGKE	_EPAPES(ph)PKPAGVEIR_	1.16242	1.15547	0.829135	2.04093	1.15895		S	101	2	___1	1	UID955	0.469052	0.592254	-0.442967	-0.964827
E9PWE8	Dpysl3;Dpysl3;Dpysl3	TTTPKGGTPAGSTRGSPTRPNPPVRNLHQSG	_GS(ph)PTRPNPPVR_	0.675001	0.630101	-0.376734	1.88189	0.652551		S	635	3	___1	0.999649	UID956	0.261471	0.323428	0.134352	-0.893491
E9PWG2	Trappc8	TSRSLNVRATVCRSNSLEDEEGRGGNMLVFV	_SNS(ph)LEDEEGR_	0.562077	NaN	-0.470527	1.99704	0.562077		S	1090	2	___1	0.999985	UID958	0.213378	NaN	0.179256	-0.945138
E9PWI3	Mcc;Mcc	ELQTRLQSVQATGPSSPGRLTPANRPINPST	_LQSVQATGPSS(ph)PGR_	5.2752	3.37609	4.14643	1.82504	3.76126	Up	S	469	2	___1	0.999373	UID961	2.22061	1.72853	-2.03115	-0.867989
Q8C8K1	Ephb4;Ephb4;Ephb4	TSENRAELRGLKRGASYLVQVRARSEAGYGP	_RGAS(ph)YLVQVR_	-0.179984	-1.34319	-2.15502	-0.604322	-0.973756		S	511	2	___1	0.999998	UID962	-0.102651	-0.68629	0.985719	0.221692
E9PWT1	Trrap;Trrap;Trrap;Trrap;Trrap	RAATGAISAVFGRSQSLPGADSLLAKPIDKQ	_SQS(ph)LPGADSLLAK_	NaN	-1.23552	-2.73049	-0.929852	-1.23552		S	2075	2	___1	0.997706	UID963	NaN	-0.631198	1.26123	0.367707
F6Q8A4	Rps6ka1;Rps6ka1;Rps6ka1;Rps6ka1;Rps6ka1;Rps6ka1	TFYFDTEFTSRTPRDSPGIPPSAGAHQLFRG	_DS(ph)PGIPPSAGAHQLFR_	-4.28499	-3.93754	-3.92064	-4.18262	-4.06008	Down	S	369	3	___1	0.999999	UID964	-1.8509	-2.0138	1.83103	1.82672
E9Q4Y2	Rsf1;Rsf1	EKAKKTSIDKDIQKLSPIPEEVVRGALESEK	_LS(ph)PIPEEVVR_	-0.189017	-0.900353	-0.341108	-1.05285	-0.62073		S	608	2	___1	1	UID965	-0.106498	-0.459695	0.117296	0.422879
E9Q4Y2	Rsf1;Rsf1	LPSEQESSKKPYRIESDEEEDFENKVGSPLD	_IES(ph)DEEEDFENK_	-0.213724	-0.700005	-0.0420778	-0.849078	-0.456865		S	1347	2	___1	1	UID967	-0.117021	-0.357178	-0.0258671	0.331476
E9Q4Y2	Rsf1;Rsf1	IPLKKREIKLSDDFDSPVKGPLCKSATPTKE	_LSDDFDS(ph)PVK_	0.174638	-0.36406	1.38808	-1.67225	-0.094711		S	401	2	___1	1	UID968	0.0483758	-0.185277	-0.710567	0.700706
Q811L6	Mast4;Mast4;Mast4	APKLSGQRYRSGRRKSAGSIPLSPLARTPSP	_S(ph)AGSIPLSPLAR_	-3.3808	-3.11918	-3.22876	-1.38708	-3.17397	Down	S	1368	2	___1	1	UID971	-1.46582	-1.59505	1.49978	0.572793
Q8K4B0	Mta1;Mta1;Mta1	AIKAECTARLPEASQSPLVLKQVVRKPLEAV	_LPEASQS(ph)PLVLK_	-1.42583	-2.55506	-1.25111	-2.57331	-1.99045		S	522	2	___1	0.999981	UID974	-0.633233	-1.30639	0.552967	1.10487
Q8K4B0	Mta1;Mta1;Mta1	TRLDGERPGPNRNNMSPHGIPARSSGSPKFA	_NNMS(ph)PHGIPAR_	0.615128	0.734062	0.63439	-0.2621	0.624759		S	449	3	___1	1	UID975	0.235972	0.376624	-0.349732	0.0681893
Q8K4B0	Mta1;Mta1;Mta1	SSLTPAKSAPVINNGSPTILGKRSYEQHNGV	_SAPVINNGS(ph)PTILGK_	-0.150288	0.164972	0.739103	-1.33146	0.007342		S	576	2	___1	0.999993	UID976	-0.0900042	0.0854246	-0.399864	0.547845
E9PX30	Map4k5;Map4k5;Map4k5	TIRSTNRNSRAERTASEINFDKLQFEPPLRK	_TAS(ph)EINFDK_	0.875263	-0.964434	-0.102429	-0.63616	-0.369294		S	335	2	___1	0.999995	UID977	0.346758	-0.492484	0.00302646	0.235972
Q64318	Zeb1;Zeb1;Zeb1	KMQAGQIPGQSPDPPSPGTGSVNIPTKTDEQ	_MQAGQIPGQSPDPPS(ph)PGTGSVNIPTK_	2.60091	0.555209	2.60501	2.09398	2.34745	Up	S	624	3	___1	0.999716	UID978	1.08168	0.285106	-1.29318	-0.988619
Q64318	Zeb1;Zeb1;Zeb1	QIPGQSPDPPSPGTGSVNIPTKTDEQPQPAD	_M(ox)QAGQIPGQSPDPPSPGTGS(ph)VNIPTK_	NaN	0.620169	2.00447	1.72102	1.72102		S	629	3	___1	0.925155	UID979	NaN	0.318346	-1.00567	-0.82133
E9PX68	Slc4a1ap;Slc4a1ap;Slc4a1ap	KQQQILLEKKMLGEDSDEEEEANTTEGKSSR	_MLGEDS(ph)DEEEEANTTEGK_	NaN	-0.0879676	-0.174042	0.710459	-0.0879676		S	258	2	___1	1	UID980	NaN	-0.0440029	0.037312	-0.368048
Q8K1A6	Cc2d1a;Cc2d1a	GVLETAMRLANHDEGSDDEEEETPKKQNTPA	_LANHDEGS(ph)DDEEEETPKK_	0.417014	0.849583	0.953708	2.21685	0.901645		S	435	3	___1	1	UID981	0.151599	0.435735	-0.502607	-1.04374
E9PXB7	Nedd4l;Nedd4l	NSNNHLVEPQIRRPRSLSSPTVTLSAPLEGA	_S(ph)LSSPTVTLSAPLEGAK_	-1.30638	0.229597	-2.92944	NaN	-1.30638		S	475	2	___1	0.996565	UID982	-0.582361	0.118493	1.35648	#VALUE!
E9PXB7	Nedd4l;Nedd4l	NNHLVEPQIRRPRSLSSPTVTLSAPLEGAKD	_SLS(ph)SPTVTLSAPLEGAK_	-1.17451	0.384961	-3.01529	1.59551	-0.394775		S	477	2	___1	0.993744	UID983	-0.526203	0.197991	1.39758	-0.765033
E9PXE5	Dst;Dst;Dst;Dst	KDYELQTMTYRAMVESQQKSPVKRRRIQSSA	_AMVES(ph)QQKSPVKR_	-0.813709	NaN	-0.76636	-1.01059	-0.813709		S	1377	3	___1	0.998776	UID985	-0.372543	NaN	0.320889	0.403922
E9PXE5	Dst;Dst;Dst;Dst	LQTMTYRAMVESQQKSPVKRRRIQSSADLVI	_AMVESQQKS(ph)PVK_	-0.96712	-0.148789	-0.676247	-0.870224	-0.773235		S	1381	2	___1	1	UID986	-0.437877	-0.0751248	0.277747	0.340961
E9PXE5	Dst;Dst;Dst	LTEGEIIGRKERLGASLTPDGHWRGDREECD	_LGAS(ph)LTPDGHWR_	0.115487	1.37919	0.76618	NaN	0.76618		S	2519	2	___1	0.889622	UID987	0.0231843	0.706729	-0.412827	#VALUE!
E9PXE5	Dst;Dst;Dst;Dst	ADDLSGLMDKLTRQKSFSEDVISHKGDLRYI	_QKS(ph)FSEDVISHK_	2.03863	0.844993	0.882782	0.922218	0.9025		S	3894	3	___1	0.995561	UID988	0.842215	0.433387	-0.468651	-0.463032
E9PXU2	Adam17;Adam17	GFEKDPFPNSSTAAKSFEDLTDHPVTRSEKA	_S(ph)FEDLTDHPVTR_	-0.177075	1.1521	0.20426	0.999258	0.601759		S	813	2	___1	1	UID991	-0.101412	0.59053	-0.143803	-0.497588
Q8C2B3-3	Hdac7;Hdac7;Hdac7;Hdac7;Hdac7	KKSLERRKNPLLRKESAPPSLRRRPAETLGD	_KES(ph)APPSLR_	1.99585	1.83987	1.92128	1.24407	1.88057		S	182	2	___1	0.999999	UID994	0.823994	0.942458	-0.965841	-0.607397
Q8C2B3-3	Hdac7;Hdac7;Hdac7;Hdac7;Hdac7	LPTEPPEHFPLRKTVSEPNLKLRYKPKKSLE	_TVS(ph)EPNLK_	2.11394	1.70587	1.56807	0.947232	1.63697		S	156	2	___1	1	UID995	0.874285	0.873892	-0.796736	-0.474252
E9PY55	Ncor2;Ncor2;Ncor2;Ncor2;Ncor2;Ncor2	SPRPSLLTPAGDPRASTSPQKPLDLKQLKQR	_AS(ph)TSPQKPLDLK_	-0.308272	NaN	0.00697668	-0.584679	-0.308272		S	953	2	___1	0.784507	UID1001	-0.157287	NaN	-0.0493524	0.212881
E9PY55	Ncor2;Ncor2;Ncor2;Ncor2;Ncor2;Ncor2	DEVDEPEGGDKGRLLSPRPSLLTPAGDPRAS	_LLS(ph)PRPSLLTPAGDPR_	-0.631684	0.399425	-0.493592	0.138209	-0.177692		S	938	2	___1	0.997411	UID1006	-0.295022	0.205393	0.190299	-0.111368
E9PY55	Ncor2;Ncor2;Ncor2;Ncor2;Ncor2;Ncor2	EPEGGDKGRLLSPRPSLLTPAGDPRASTSPQ	_LLSPRPS(ph)LLTPAGDPR_	-0.699354	0.805889	NaN	0.0112197	0.0112197		S	942	3	___1	0.921134	UID1007	-0.323841	0.413377	#VALUE!	-0.0544072
E9PY55	Ncor2;Ncor2;Ncor2;Ncor2	HLSPGSIIQPQRRRPSLLSEFQPGSERSQEL	_RPS(ph)LLSEFQPGSER_	-3.4755	-0.31433	-2.57863	-0.467398	-1.52301		S	67	2	___1	0.999975	UID1010	-1.50615	-0.159831	1.18853	0.160275
E9PY55	Ncor2;Ncor2;Ncor2;Ncor2;Ncor2;Ncor2;Ncor2	LYRDGEQGEPRMGSKSPGNTSQPPAFFSKLT	_S(ph)PGNTSQPPAFFSK_	-0.420731	0.121051	-0.0379023	0.305802	0.0415744		S	2211	2	___1	1	UID1011	-0.205181	0.0629506	-0.0278662	-0.186541
H3BJS0	Ctage5;Ctage5;Ctage5;Ctage5;Ctage5;Ctage5;Ctage5;Ctage5;Ctage5;Ctage5	GNGTKDNLGNSNVPDSPIPAECEAAGRGFFP	_DNLGNSNVPDS(ph)PIPAECEAAGR_	-1.41539	-0.807971	-1.0893	-0.873016	-0.981158		S	680	2	___1	1	UID1013	-0.628787	-0.412424	0.4755	0.342213
H3BJS0	Ctage5;Ctage5;Ctage5;Ctage5;Ctage5;Ctage5;Ctage5;Ctage5;Ctage5;Ctage5	ALQRQDRFYPNSGRLSGPAELRSYNMPSLDK	_LS(ph)GPAELR_	-0.292067	-0.634678	0.401261	-0.853676	-0.463372		S	637	2	___1	1	UID1014	-0.150385	-0.323751	-0.238119	0.333538
E9PYB0	Ahnak2	HSSSEASEHRETRDMSPTSTDTEVHRTADRQ	_DMS(ph)PTSTDTEVHR_	0.229553	0.111318	-0.366559	0.463639	0.170436		S	286	2	___1	1	UID1016	0.0717627	0.0579701	0.129481	-0.257338
E9PYB0	Ahnak2	RRRFLNLRFGMTSGQSPDTSEQKGKDPKDRR	_FGM(ox)TSGQS(ph)PDTSEQK_	3.28733	2.81522	3.6601	2.41534	3.05127	Up	S	326	2	___1	0.999996	UID1018	1.37401	1.44154	-1.79832	-1.13277
E9PYB0	Ahnak2;Ahnak2;Ahnak2	AAKDSKFKMPKFKMPSFGVSAPGKPSLEASL;VAKDSKFKMPKFKMPSFGVSAPGKPSLEASL	_MPS(ph)FGVSAPGK_	1.36638	3.04105	0.67845	2.13269	1.74954		S	134	2	___1	0.999999	UID1019	0.555914	1.55709	-0.370825	-1.00599
E9PYD5	Tcea1;Tcea1	STDKDPEEKKKEPAISSQNSPEAREESSSSS	_KKEPAIS(ph)SQNSPEAR_	NaN	-0.366112	-0.822053	-1.18448	-0.822053		S	96	2	___1	0.88526	UID1020	NaN	-0.186328	0.347552	0.481919
E9PYD5	Tcea1;Tcea1	DPEEKKKEPAISSQNSPEAREESSSSSNVSS	_KKEPAISSQNS(ph)PEAR_	-0.514775	-0.809247	-1.14832	-1.04661	-0.927929		S	100	3	___1	0.999999	UID1021	-0.245232	-0.413077	0.503756	0.420078
E9PYH0	Vcan;Vcan;Vcan	IPGIQTDLDPEIKLESHGSSEESLQVQEKYE	_LES(ph)HGS(ph)SEESLQVQEK_	-0.378467	-0.147512	1.93178	0.9108	0.381644		S	2578	3	___1	0.929312	UID1023	-0.187181	-0.0744715	-0.970865	-0.45791
E9PYH0	Vcan;Vcan;Vcan	IQTDLDPEIKLESHGSSEESLQVQEKYEGAV	_LESHGS(ph)S(ph)EESLQVQEK_	-0.207375	-0.560465	NaN	0.774437	-0.207375		S	2581	2	___1	0.999996	UID1024	-0.114316	-0.285776	#VALUE!	-0.396745
E9PYH0	Vcan;Vcan;Vcan	QTDLDPEIKLESHGSSEESLQVQEKYEGAVT	_LESHGS(ph)S(ph)EESLQVQEK_	-0.479346	0.891173	1.32812	0.996217	0.943695		S	2582	2	___1	0.999997	UID1025	-0.230144	0.457016	-0.681863	-0.496224
E9PYH0	Vcan;Vcan	ILGDKMEDHERMEDVSNEVRMLISKTGSISQ	_MEDVS(ph)NEVR_	3.32993	6.86147	3.91295	6.5651	5.23902	Up	S	2281	2	___1	1	UID1026	1.39215	3.51197	-1.91937	-2.99413
E9PYH6	Setd1a	PAGPPDAAPRLDERPSSPIPLLPPPKKRRKT	_LDERPS(ph)SPIPLLPPPK_	-0.399397	-0.416707	0.760088	-0.671469	-0.408052		S	1159	3	___1	0.855368	UID1027	-0.196095	-0.212216	-0.409911	0.25181
E9PYH6	Setd1a	AGPPDAAPRLDERPSSPIPLLPPPKKRRKTV	_LDERPSS(ph)PIPLLPPPK_	-0.117813	-0.526438	0.566275	-0.0130702	-0.0654416		S	1160	3	___1	0.996932	UID1028	-0.0761738	-0.268365	-0.317121	-0.0435121
E9PYK3	Parp4	FDPGKFSQGPNNISFSPKAPEMGVLHQSPFC	_FSQGPNNISFS(ph)PK_	0.740493	1.07099	0.801611	1.94897	0.9363		S	1683	2	___1	0.999996	UID1031	0.289362	0.549028	-0.42979	-0.923578
E9PYL2	Prr12	KRHPPLYQAGLTPPLSPPKSVPASVPTRGLQ	_HPPLYQAGLTPPLS(ph)PPK_	NaN	0.27775	0.0526294	0.0128232	0.0526294		S	1299	2	___1	0.999986	UID1033	NaN	0.143132	-0.071209	-0.0551265
E9PYL2	Prr12	PLQSPPATGRPPGVGSPGAPGKYLSSVLASA	_PLQSPPATGRPPGVGS(ph)PGAPGK_	-0.693762	-1.53125	0.876991	-0.468262	-0.581012		S	579	3	___1	0.998366	UID1034	-0.321459	-0.782521	-0.465879	0.160662
E9PYQ1	Tgfb1i1;Tgfb1i1;Tgfb1i1	PPQPPAASPTREGCPSPPGQTSKGSLDTMLG	_EGCPS(ph)PPGQTSK_	5.51311	7.60833	4.96293	10.3385	6.56072	Up	S	194	2	___1	1	UID1035	2.32193	3.89414	-2.42206	-4.68668
E9PYQ1	Tgfb1i1;Tgfb1i1;Tgfb1i1	EGRPLCENHFHAQRGSLCATCGLPVTGRCVS	_GS(ph)LCATCGLPVTGR_	5.32742	3.50277	3.82113	NaN	3.82113	Up	S	403	2	___1	0.999997	UID1036	2.24285	1.79335	-1.87541	#VALUE!
E9PYQ1	Tgfb1i1;Tgfb1i1;Tgfb1i1	QNHLPASGPPQPPAASPTREGCPSPPGQTSK	_VQNHLPASGPPQPPAAS(ph)PTR_	4.11833	7.27005	3.92632	10.2721	5.69419	Up	S	186	2	___1	0.999991	UID1037	1.72792	3.72104	-1.92577	-4.65686
E9PYT0	Arhgap5;Arhgap5	NTRESTHQSEDVFLPSPRDCFPYNNYPDSDD	_ESTHQSEDVFLPS(ph)PR_	-1.29463	NaN	-2.46451	-1.74755	-1.74755		S	968	3	___1	1	UID1038	-0.577358	NaN	1.13389	0.734482
E9PYT0	Arhgap5;Arhgap5	PVETWKGGIDNPAITSDQEVDDKKIKKKTHK	_GGIDNPAITS(ph)DQEVDDKK_	-1.93637	-0.291711	-0.463066	-1.01059	-0.736828		S	1219	2	___1	0.980975	UID1039	-0.850663	-0.148257	0.175684	0.403922
E9PYZ7	Rbm26	VYWHREGTTQQLQTTSPKPLVQQPILPVVKQ	_EGTTQQLQTTS(ph)PK_	NaN	-3.63345	2.30451	-0.311722	-0.311722		S	621	2	___1	0.966762	UID1043	NaN	-1.8582	-1.14931	0.090447
E9PYZ7	Rbm26;Rbm26;Rbm26;Rbm26	KEEEREKKFSRRLNHSPPQSSSRYRDNRSRD	_LNHS(ph)PPQSSSR_	-0.47732	-1.14845	-0.831039	-1.2945	-0.989745		S	127	3	___1	1	UID1044	-0.229281	-0.586644	0.351855	0.531269
E9PZ26	Brd1	VSPPKSAKNTETQPTSPQLGTKTFLSVVLPR	_NTETQPTS(ph)PQLGTK_	1.21005	3.21935	1.05636	3.47408	2.2147		S	906	2	___1	0.98153	UID1045	0.489337	1.64833	-0.551754	-1.60766
E9PZ54	Gcom1;Polr2m	SGRYREVRDEADAQSSDEC____________	_EVRDEADAQSS(ph)DEC_	NaN	-1.51761	-0.173455	-0.412535	-0.412535		S	363	2	___1	0.755051	UID1050	NaN	-0.77554	0.0370308	0.135666
Q91V17	Znrf1;Znrf1;Znrf1;Znrf1	GGHHRDGMLYLGSRASLADALPLHIAPRWFS	_AS(ph)LADALPLHIAPR_	-0.776808	0.443582	-1.16528	2.32707	-0.166613		S	123	3	___1	1	UID1052	-0.356827	0.227987	0.511873	-1.09317
Q3TN34	Micall2;Micall2	ELSGKKGLSQPAKLPSPAQTQRSPLSPARTN	_LPS(ph)PAQTQR_	1.65321	2.29666	-1.03352	0.739942	1.19658		S	143	2	___1	1	UID1055	0.678072	1.1762	0.448795	-0.381273
Q3TN34	Micall2;Micall2	AVLDSGLAPPGEAVTSPVRLHPDYIPQEELQ	_SAVLDSGLAPPGEAVTS(ph)PVR_	-2.62779	-0.738733	-2.4737	-2.02182	-2.24776	Down	S	832	2	___1	0.964866	UID1056	-1.14513	-0.376995	1.13829	0.857503
E9PZF0	Gm20390;Nme2	RGDFCIQVGRNIIHGSDSVESAEKEIHLWFK	_NIIHGS(ph)DSVESAEK_	2.0155	1.27932	2.54962	-0.269455	1.64741		S	235	2	___1	0.999947	UID1057	0.832363	0.655627	-1.26666	0.071488
E9PZF0	Gm20390;Nme2	DFCIQVGRNIIHGSDSVESAEKEIHLWFKPE	_NIIHGSDS(ph)VESAEK_	1.8834	1.18505	2.71787	-0.095797	1.53422		S	237	2	___1	0.999975	UID1058	0.776104	0.607389	-1.34722	-0.00640536
E9PZM4	Chd2	NKAPRLKDEHGLEPASPRHSDNPSEEGEVKD	_LKDEHGLEPAS(ph)PR_	-1.39315	-0.762227	-1.40018	0.946473	-1.07769		S	1365	3	___1	1	UID1060	-0.619315	-0.389017	0.624335	-0.473911
E9PZM7	Scaf11	DTGIEAKEFCADHDISPDTSLRGRDSAEHQE	_EFCADHDIS(ph)PDT(ph)SLR_	0.497179	0.523798	0.217338	-0.185731	0.357259		S	498	2	___1	1	UID1061	0.18574	0.269033	-0.150065	0.033934
E9PZM7	Scaf11	VDKAPKPRTRRSRFHSPSTTWSPNKDAAQEK	_FHS(ph)PSTTWS(ph)PNK_	0.380528	0.148716	0.279432	-0.127399	0.214074		S	821	2	___1	0.999998	UID1062	0.13606	0.0771063	-0.179792	0.00776948
E9PZM7	Scaf11	KAPKPRTRRSRFHSPSTTWSPNKDAAQEKRR	_FHSPS(ph)TTWSPNK_	NaN	1.23203	1.15104	-0.0669796	1.15104		S	823	2	___1	0.916412	UID1063	NaN	0.63143	-0.597081	-0.0193313
E9PZP8	Herc1;Herc1	SSLPASPSDEVGRRQSLTSPDSQSTRPANRT	_RQS(ph)LTSPDSQSTR_	-2.83677	-2.24382	NaN	-1.23792	-2.24382		S	2718	2	___1	0.99947	UID1065	-1.23413	-1.14714	#VALUE!	0.505891
E9PZW8	Myo9b;Myo9b;Myo9b;Myo9b	KDKDESSTKAQDKPESPSGSTQIQRYQHPDT	_AQDKPES(ph)PSGSTQIQR_	-0.574155	0.771812	-1.2842	1.67223	0.0988285		S	1293	3	___1	0.990338	UID1066	-0.270521	0.39594	0.56881	-0.799445
E9PZW8	Myo9b;Myo9b;Myo9b;Myo9b	KDESSTKAQDKPESPSGSTQIQRYQHPDTER	_AQDKPESPS(ph)GSTQIQR_	-1.08749	0.680569	-0.883936	1.81519	-0.101684		S	1295	2	___1	0.975621	UID1067	-0.489139	0.349252	0.377179	-0.863572
E9PZW8	Myo9b;Myo9b;Myo9b;Myo9b	MNKSPDGMSPKKETPSPEMETAAQKTVPAES	_KETPS(ph)PEMETAAQK_	-0.685602	-0.365952	-1.84787	0.580892	-0.525777		S	1142	2	___1	0.999981	UID1068	-0.317984	-0.186246	0.83867	-0.309932
E9PZW8	Myo9b;Myo9b;Myo9b;Myo9b	PSSSKQAQVVGDPPGSPSPVQRPTTLALDSR	_QAQVVGDPPGS(ph)PSPVQR_	0.25524	0.916527	1.21377	1.68226	1.06515		S	1247	2	___1	0.999995	UID1069	0.0827026	0.46999	-0.627115	-0.803947
E9PZW8	Myo9b;Myo9b;Myo9b;Myo9b	CREESSTHREPSRRASLEIGESFPEGTKGPR	_RAS(ph)LEIGESFPEGTK_	-0.727797	-0.38349	-0.376734	0.721687	-0.380112		S	1204	2	___1	1	UID1070	-0.335954	-0.195219	0.134352	-0.373084
E9PZW8	Myo9b;Myo9b;Myo9b;Myo9b	IIRLQSLCRGHLQRRSFSQMVSEKQKAEQAR	_S(ph)FSQMVSEK_	-7.39901	-4.44885	-6.87891	-3.30428	-5.66388	Down	S	1072	2	___1	0.999999	UID1071	-3.1771	-2.27544	3.24732	1.43275
Q7TPS5	Kiaa0528;5730419I09Rik	LDKLSSPAAFLPACSSPSRELKEIPFNEDPN	_LSSPAAFLPACSS(ph)PSR_	-0.489613	0.916934	-0.498869	-0.0120755	-0.250844		S	260	2	___1	0.993693	UID1072	-0.234516	0.470198	0.192825	-0.0439583
G3X9Q6	Larp4;Larp4;Larp4	SAVPKDTLNPVAVPVSSPTATKPSPANTASP	_DTLNPVAVPVS(ph)SPTATKPSPANTASPCTSNINPPR_	-0.982435	0.442378	0.310068	0.375027	0.342548		S	578	4	___1	0.989454	UID1074	-0.4444	0.227371	-0.19446	-0.217591
G3X9Q6	Larp4;Larp4;Larp4	AVPKDTLNPVAVPVSSPTATKPSPANTASPC	_DTLNPVAVPVSS(ph)PTATK_	-0.460524	0.496288	-0.148682	NaN	-0.148682		S	579	2	___1	0.999816	UID1075	-0.222128	0.254957	0.0251707	#VALUE!
G3X9Q6	Larp4;Larp4;Larp4	GVTRRNGKEQYVPPRSPK_____________	_EQYVPPRS(ph)PK_	-0.159387	2.19349	0.123615	0.420526	0.27207		S	717	2	___1	1	UID1076	-0.0938791	1.1234	-0.105194	-0.238
Q9QXL1	Kif21b;Kif21b;Kif21b	CLGPPLDSSTKNITKSLASLVEIKEDGVGFS	_S(ph)LASLVEIK_	-2.90747	-3.4854	-3.45026	-1.42406	-3.17887	Down	S	1168	2	___1	1	UID1080	-1.26424	-1.78245	1.60583	0.58938
E9Q0A7	Oxr1	APGDPGCGPEELRPPSPASPEGPDTGQKKTL	_EPAPGDPGCGPEELRPPS(ph)PASPEGPDTGQK_	-1.17774	-2.2761	NaN	-4.02066	-2.2761		S	59	3	___1	0.968783	UID1081	-0.527575	-1.16366	#VALUE!	1.75408
E9Q0A7	Oxr1;Oxr1	PAVLKDQQGQELKRDSETEVEELRKLWKTHS	_RDS(ph)ETEVEELRK_	-1.33531	-1.02538	0.0667823	-2.118	-1.18034		S	481	3	___1	0.96082	UID1082	-0.594683	-0.52367	-0.0779848	0.900645
E9Q0N0	Itsn1;Itsn1;Itsn1;Itsn1;Itsn1;Itsn1;Itsn1;Itsn1	VISSSSVDQRLPEEPSSEDEQQPEKKLPVTF	_LPEEPS(ph)S(ph)EDEQQPEKK_	0.658286	1.55173	1.21358	1.30511	1.25935		S	334	2	___1	1	UID1084	0.254352	0.795019	-0.627026	-0.634778
E9Q0N0	Itsn1;Itsn1;Itsn1;Itsn1;Itsn1;Itsn1;Itsn1;Itsn1	ISSSSVDQRLPEEPSSEDEQQPEKKLPVTFE	_LPEEPS(ph)S(ph)EDEQQPEKK_	0.608506	1.40481	0.837586	1.65531	1.1212		S	335	2	___1	1	UID1085	0.233152	0.719841	-0.447013	-0.791857
E9Q0N0	Itsn1;Itsn1;Itsn1;Itsn1;Itsn1;Itsn1	LRQRSAFTPATATGSSPSPVLGQGEKVEGLQ	_SAFTPATATGSS(ph)PSPVLGQGEK_	1.88735	0.383485	1.99661	0.727065	1.30721		S	900	2	___1	0.775609	UID1086	0.777788	0.197236	-1.00191	-0.375497
E9Q0N0	Itsn1;Itsn1;Itsn1;Itsn1;Itsn1;Itsn1	QRSAFTPATATGSSPSPVLGQGEKVEGLQAQ	_SAFTPATATGSSPS(ph)PVLGQGEK_	1.29583	0.548259	1.82376	1.26684	1.28133		S	902	2	___1	0.996809	UID1087	0.525868	0.28155	-0.919151	-0.617609
E9Q0P3	Nfat5;Nfat5;Nfat5;Nfat5;Nfat5	PAAGALNVNVKKEISSPARPCSFEEAMKAMK	_EISS(ph)PARPCSFEEAMK_	-0.582092	NaN	0.434965	1.58476	0.434965		S	578	2	___1	0.986509	UID1088	-0.273901	NaN	-0.254255	-0.760211
E9Q0P3	Nfat5;Nfat5;Nfat5;Nfat5;Nfat5	TEDVTPMEVTSEKRSSPIFQTTKSIGSTQQT	_RSS(ph)PIFQTTK_	-1.35044	-1.82424	-0.901518	-0.297492	-1.12598		S	636	2	___1	0.999982	UID1089	-0.601124	-0.932444	0.385597	0.0840642
E9Q0S6	Tns1	GFGRRAVNPTMAAPGSPSLSHRQVMGPSGPG	_AVNPTM(ox)AAPGS(ph)PSLSHR_	5.81429	4.16906	6.78729	4.04725	4.99167	Up	S	1363	2	___1	0.999375	UID1090	2.4502	2.13429	-3.29548	-1.86475
E9Q0S6	Tns1	RAVNPTMAAPGSPSLSHRQVMGPSGPGFHGN	_AVNPTMAAPGSPSLS(ph)HR_	5.88647	NaN	6.80569	3.82428	5.88647	Up	S	1367	3	___1	0.775372	UID1091	2.48094	NaN	-3.30429	-1.76474
E9Q0S6	Tns1	SLGRHLGGSGSVVPGSPSLDRHAAYGGYSTP	_HLGGSGSVVPGS(ph)PSLDR_	5.96119	4.16005	7.37767	4.40811	5.18465	Up	S	1468	2	___1	0.999995	UID1093	2.51276	2.12968	-3.57813	-2.02662
E9Q0S6	Tns1	GRHLGGSGSVVPGSPSLDRHAAYGGYSTPED	_HLGGSGSVVPGSPS(ph)LDR_	NaN	3.61988	7.11417	4.9042	4.9042	Up	S	1470	2	___1	0.981437	UID1094	NaN	1.85328	-3.45198	-2.24914
E9Q0S6	Tns1	HQVPGLHSSVVTTPGSPSLGRHPGAHQGNLA	_HPVGSHQVPGLHSSVVTTPGS(ph)PSLGR_	5.88301	4.59679	6.81971	4.69553	5.28927	Up	S	1423	4	___1	0.893336	UID1096	2.47946	2.35315	-3.31101	-2.15553
E9Q0S6	Tns1	AALSPQEKKELDRLLSGFGVDREKQGAMYRA	_LLS(ph)GFGVDR_	6.90075	5.97793	3.51403	5.86419	5.92106	Up	S	616	2	___1	1	UID1097	2.9129	3.05987	-1.72838	-2.67973
E9Q0S6	Tns1	PATSPSPDSAAFRQGSPTPALPEKRRMSVGD	_QGS(ph)PTPALPEK_	5.53822	5.08998	5.77759	5.55739	5.54781	Up	S	1535	2	___1	1	UID1098	2.33262	2.60552	-2.81208	-2.54212
E9Q0S6	Tns1	WQQQQPHPPPRQQERSPLQSLARSKPSPQLS	_S(ph)PLQSLAR_	5.53202	3.75821	5.58396	4.13224	4.83213	Up	S	836	2	___1	1	UID1099	2.32998	1.92406	-2.71938	-1.90287
E9Q0S6	Tns1	NVVSGHPASAATTPGSPSLGRHPVGSHQVPG	_QVM(ox)GPSGPGFHGNVVSGHPASAATTPGS(ph)PSLGR_	5.5914	4.33703	6.59253	4.34068	4.96604	Up	S	1397	4	___1	0.879855	UID1100	2.35527	2.22024	-3.20224	-1.99637
E9Q0S6	Tns1	VTSAHCGCDPSGLFRSQSFPDVEPQLPQAPT	_S(ph)QSFPDVEPQLPQAPTR_	5.27782	3.21728	7.27405	3.58589	4.43186	Up	S	790	2	___1	0.969071	UID1101	2.22172	1.64727	-3.52852	-1.65781
E9Q0S6	Tns1	SAHCGCDPSGLFRSQSFPDVEPQLPQAPTRG	_SQS(ph)FPDVEPQLPQAPTR_	5.61856	3.55915	5.32674	4.10851	4.71762	Up	S	792	2	___1	0.998594	UID1102	2.36684	1.8222	-2.59623	-1.89223
E9Q0S6	Tns1	SPQARHRTVGTNTPPSPGFGRRAVNPTMAAP	_TVGTNT(ph)PPS(ph)PGFGR_	4.02092	2.55666	5.10682	3.7312	3.87606	Up	S	1346	2	___1	1	UID1103	1.68643	1.30923	-2.49094	-1.72299
E9Q0S6	Tns1	GSSPKNLEEGGSMRVSPSIQPQPQSQPTSLS	_VS(ph)PSIQPQPQSQPTSLSR_	-8.84439	-3.9028	6.63105	NaN	-3.9028		S	154	2	___1	0.965244	UID1104	-3.79266	-1.99602	-3.22068	#VALUE!
E9Q0S6	Tns1	SPSIQPQPQSQPTSLSRNTSVSRAMEDSCEL	_VSPSIQPQPQSQPTSLS(ph)R_	7.92959	2.05272	7.86151	NaN	7.86151	Up	S	169	2	___1	0.999628	UID1106	3.35106	1.05137	-3.80977	#VALUE!
E9Q0S6	Tns1	VSVDYNTSDPLIRWDSYDNFSGHREDGMEEV	_WDS(ph)YDNFSGHR_	6.42717	4.73011	5.62834	4.77797	5.20315	Up	S	509	2	___1	1	UID1107	2.71121	2.42137	-2.74063	-2.19251
E9Q0V6	Nhsl2	IGFSNFSQRDQGHSSSPTGSLARSATSDIRP	_DQGHSSS(ph)PTGSLAR_	-0.61105	NaN	-1.10314	1.00489	-0.61105		S	301	2	___1	0.978299	UID1108	-0.286234	NaN	0.482126	-0.500116
E9Q137	Tex264;Tex264	LDVRPGSRETSATTLSPGAGNRGWDDGDNRS	_ETSATTLS(ph)PGAGNR_	0.071196	0.514658	-0.0315054	1.5785	0.292927		S	243	2	___1	0.999118	UID1111	0.00432164	0.264356	-0.0309288	-0.757404
E9Q156	Wdr4;Wdr4	QQQLKKKRQRSPFPGSPEQTKKACPGQSALS	_SPFPGS(ph)PEQTK_	0.643486	0.0488799	0.980208	-0.32288	0.346183		S	440	2	___1	0.999998	UID1112	0.248049	0.026021	-0.515295	0.0954519
E9Q1G8	Sept7;Sept7;Sept7	YNGVDNNKNKGQLTKSPLAQMEEERREHVAK	_S(ph)PLAQM(ox)EEER_	-1.65144	-1.32541	NaN	-0.826505	-1.32541		S	334	2	___1	1	UID1116	-0.729316	-0.677195	#VALUE!	0.321351
E9Q1K3	Add1;Add1;Add1;Add1;Add1	____MNGDTRAAVVTSPPPTTAPHKERYFDR	_AAVVTS(ph)PPPTTAPHK_	2.01417	3.14424	1.82393	4.07987	2.5792	Up	S	12	2	___1	0.999878	UID1117	0.831796	1.6099	-0.919233	-1.87938
E9Q1K3	Add1;Add1;Add1;Add1;Add1	SGRGDDASEEGQNGSSPKSKTKWTKEDGHRT	_GDDASEEGQNGSS(ph)PK_	3.88432	3.23048	NaN	3.05125	3.23048	Up	S	465	2	___1	0.981679	UID1118	1.62826	1.65402	#VALUE!	-1.418
E9Q1K3	Add1;Add1;Add1;Add1;Add1	ELEEYRREVERKQKGSEENLDETREQKEKSP	_QKGS(ph)EENLDETR_	5.52636	4.2984	5.42057	3.30473	4.85948	Up	S	586	2	___1	1	UID1119	2.32757	2.20047	-2.64115	-1.5317
Q8BUH8	Senp7;Senp7;Senp7	____MDRARPGRRRASSEIVTEGKRKKSSPA	_RAS(ph)SEIVTEGK_	-1.65999	-1.94311	NaN	-3.01774	-1.94311		S	12	2	___1	0.99455	UID1120	-0.732956	-0.993264	#VALUE!	1.30422
E9Q1P8	Irf2bp2	ITPTSSFVSPPPPTASPHSNRTTPPEAAQNG	_IPITPTSSFVSPPPPTAS(ph)PHSNR_	0.325207	0.788476	1.43449	1.72676	1.11148		S	389	3	___1	0.98949	UID1121	0.1125	0.404467	-0.732788	-0.823907
E9Q1P8	Irf2bp2	NGSKAVARTARKRKPSPEPEGEVGPPKINGE	_RKPS(ph)PEPEGEVGPPK_	0.189021	0.73015	0.806445	0.73404	0.732095		S	343	3	___1	1	UID1123	0.0545011	0.374622	-0.432104	-0.378626
E9Q1P8	Irf2bp2	NGFSKLEEPPELNRQSPNPRRAHAVPPTLVP	_LEEPPELNRQS(ph)PNPR_	0.447374	0.790605	1.24709	1.32671	1.01885		S	169	2	___1	1	UID1124	0.164529	0.405557	-0.643067	-0.644465
E9Q1P8	Irf2bp2	EAREPSKEKAQPAHRSPADSLSSAAGASELS	_S(ph)PADSLSSAAGASELSAEGAGK_	0.493901	1.38988	1.0102	1.21922	1.11471		S	250	2	___1	0.999988	UID1126	0.184344	0.7122	-0.529656	-0.596252
E9Q1P8	Irf2bp2	ARQLKRAHGCFPEGRSPTGAQPAAAKPPPLS	_S(ph)PTGAQPAAAKPPPLSAK_	-0.443497	0.679462	0.229736	0.789377	0.454599		S	71	2	___1	0.998387	UID1127	-0.214876	0.348686	-0.156	-0.403447
P97445	Cacna1a;Cacna1a	PAARRMAGPAAPPGGSPRGCRRAPRWPAHAP	_M(ox)AGPAAPPGGS(ph)PR_	4.49804	0.95072	7.55461	-2.69754	2.72438		S	2273	2	___1	1	UID1129	1.88963	0.487486	-3.66284	1.1606
P97445	Cacna1a;Cacna1a	QLPQTPCTPRPLVSYSPAPRRPAARRMAGPA	_PLVSYS(ph)PAPR_	4.93648	0.802712	NaN	-2.6053	0.802712		S	2252	2	___1	0.999184	UID1130	2.07635	0.411752	#VALUE!	1.11922
E9Q1U6	Ctif;Ctif	NSSAASASSEAGSSRSQEIEELERFIDSYVL	_S(ph)QEIEELER_	1.18875	1.1893	0.631243	1.94934	1.18902		S	18	2	___1	1	UID1133	0.480265	0.609566	-0.348225	-0.923742
E9Q1W7	Tbck	GGINKIRPTGLLTVPSPQI____________	_IRPTGLLTVPS(ph)PQI_	-1.30846	0.530808	-2.12289	1.05112	-0.388826		S	890	2	___1	0.999998	UID1134	-0.583247	0.27262	0.970338	-0.520852
E9Q238	Kank1;Kank1	QRASSQNEACGVRKRSYSAGNASQLELLARA	_S(ph)YSAGNASQLELLAR_	2.88743	2.8823	2.37771	NaN	2.8823	Up	S	323	2	___1	0.918409	UID1135	1.2037	1.47586	-1.18436	#VALUE!
E9Q238	Kank1;Kank1	ASSQNEACGVRKRSYSAGNASQLELLARARR	_SYS(ph)AGNASQLELLAR_	NaN	4.33515	1.77733	3.13802	3.13802		S	325	2	___1	0.998574	UID1136	NaN	2.21928	-0.896925	-1.45692
E9Q286	BC018507	PSPSPSTAAASGRIVSSPLQFCAATPKHALP	_IVS(ph)SPLQFCAATPK_	-0.142833	-1.5236	0.719842	NaN	-0.142833		S	1676	2	___1	0.805629	UID1138	-0.0868291	-0.778605	-0.390642	#VALUE!
E9Q286	BC018507	SPSPSTAAASGRIVSSPLQFCAATPKHALPV	_IVSS(ph)PLQFCAATPK_	NaN	-2.49101	0.762933	-2.57196	-2.49101		S	1677	2	___1	0.959511	UID1139	NaN	-1.27362	-0.411272	1.10427
E9Q2H1	Ubr5;Ubr5	RREMEKLRNQQSRDLSLEVDRDRDLLIQQTM	_DLS(ph)LEVDR_	0.25172	0.449114	0.614526	0.577505	0.51331		S	2241	2	___1	1	UID1141	0.0812032	0.230818	-0.340222	-0.308412
E9Q2H1	Ubr5;Ubr5	SQSSYIIRNPQQRRISQSQPVRGRDEEQDDI	_RIS(ph)QSQPVR_	0.300046	0.477561	0.330968	0.366735	0.348851		S	1549	2	___1	0.999987	UID1145	0.101784	0.245374	-0.204466	-0.213872
E9Q2I4	C130039O16Rik	IRSGVIQSTKRRRRVSQEANLLTLAQKAVEL	_VS(ph)QEANLLTLAQK_	-1.69382	-1.93722	-1.88538	-1.65658	-1.7896		S	456	2	___1	1	UID1148	-0.747366	-0.990251	0.856627	0.693677
E9Q2N1	Brwd1;Brwd1	HRNASAVARKKLLHNSDDQSLKSETEELKDQ	_LLHNS(ph)DDQSLK_	-4.87671	NaN	-2.92838	-0.24734	-2.92838		S	1682	2	___1	0.999999	UID1152	-2.1029	NaN	1.35597	0.0615688
E9Q2N1	Brwd1;Brwd1	CEEKCGERRGPEVEGSPVSEALREAILAPQC	_RGPEVEGS(ph)PVSEALR_	-1.91566	-1.30368	NaN	-2.06607	-1.91566		S	1830	2	___1	0.999983	UID1153	-0.841844	-0.666073	#VALUE!	0.877352
E9Q2S0	Pcdh7;Pcdh7	PNGQRYDSVNEKLSDSPSMGRYRSVNGGPGS	_LSDS(ph)PSMGR_	8.35372	6.26268	4.99312	7.59583	6.92925	Up	S	974	2	___1	0.999935	UID1155	3.53169	3.20558	-2.43651	-3.45645
Q7TSS3	Ikbkg;Ikbkg;Ikbkg;Ikbkg	PAHHSFHLALSNQRRSPPEEPPDFCCPKCQY	_S(ph)PPEEPPDFCCPK_	-0.711502	-0.344126	-0.673512	-0.704257	-0.688885		S	398	2	___1	1	UID1157	-0.329015	-0.175077	0.276437	0.266517
Q91YE5-3	Baz2a;Baz2a;Baz2a	RASVKRELTGSNASTSPARSRGRPRKPKPGS	_ELTGSNASTS(ph)PAR_	-1.48776	-1.36354	-0.562262	-0.410192	-0.962901		S	1175	2	___1	0.994696	UID1158	-0.659609	-0.696704	0.223175	0.134615
E9Q474	Akap13;Akap13;Akap13	GNDENMSNTWKFLSHSTDSLNKICKVNESTE	_FLSHS(ph)TDSLNK_	0.130123	-0.996467	0.346669	0.401842	0.238396		S	1910	2	___1	0.989603	UID1161	0.0294175	-0.508875	-0.211983	-0.229619
E9Q474	Akap13;Akap13;Akap13	ENMSNTWKFLSHSTDSLNKICKVNESTESLT	_FLSHS(ph)TDS(ph)LNK_	0.49241	0.985894	2.77187	0.966817	0.976356		S	1913	2	___1	1	UID1162	0.183709	0.505484	-1.37307	-0.483037
E9Q474	Akap13;Akap13;Akap13	VIMRNKSSQPKERPRSAVLLADEATAAPMFT	_S(ph)AVLLADEATAAPMFTNR_	1.99489	1.23403	1.9901	0.969786	1.61206		S	1857	2	___1	1	UID1163	0.823586	0.632454	-0.998789	-0.484368
E9Q3C1	C2cd2	KLFFRRRHQQKDPGLSQSHNDLVFLQQPEGR	_DPGLS(ph)QSHNDLVFLQQPEGR_	2.88728	1.99555	3.38216	1.4463	2.44142		S	647	3	___1	0.891304	UID1166	1.20364	1.02212	-1.66525	-0.698108
E9Q3E2	Synpo;Synpo	TSSRTPSRTVSPRAASPAKPSSLDLVPNLPR	_AAS(ph)PAKPSSLDLVPNLPR_	1.08594	2.03251	2.3652	0.617785	1.55922		S	833	2	___1	1	UID1167	0.436482	1.04103	-1.17837	-0.32648
E9Q3E2	Synpo;Synpo	SRTVSPRAASPAKPSSLDLVPNLPRAGLPPS	_AASPAKPSS(ph)LDLVPNLPR_	1.16217	2.0829	2.16833	0.343356	1.62254		S	839	3	___1	0.95817	UID1168	0.468948	1.06681	-1.08412	-0.203386
E9Q3E2	Synpo;Synpo	SLDLVPNLPRAGLPPSPALPRPSRSSPGLYT	_AGLPPS(ph)PALPR_	1.49191	2.08653	2.76812	NaN	2.08653		S	854	2	___1	1	UID1169	0.609377	1.06867	-1.37127	#VALUE!
E9Q3E2	Synpo;Synpo	YVIESSGHAELARCPSPTMSLPSSWKYTTNA	_CPS(ph)PTMSLPSSWK_	0.0860242	1.62946	1.12318	-0.02333	0.604602		S	740	2	___1	0.999997	UID1170	0.0106367	0.834792	-0.583744	-0.0389101
E9Q3E2	Synpo	ICPRGWNGSLRLKRGSLPTEASCTT______	_RGS(ph)LPTEASCTT_	-0.906947	2.57164	-0.480888	-2.15329	-0.693917		S	1091	2	___1	0.999971	UID1172	-0.412251	1.3169	0.184217	0.916477
E9Q3E2	Synpo;Synpo	TSPSKPGSPKHPSPQSPSRGVAGHIMEGYSE	_HPSPQS(ph)PSR_	-4.09722	-3.02734	0.0196949	0.399655	-1.50382		S	230	2	___1	0.992508	UID1173	-1.77093	-1.54806	-0.0554413	-0.228638
E9Q3E2	Synpo	FSPPQGPPPPPARMRSPQPASPARNFRGAAF	_MRS(ph)PQPASPAR_	0.895447	0.833906	2.40088	-0.242406	0.864677		S	1002	2	___1	1	UID1174	0.355355	0.427713	-1.19545	0.0593554
E9Q3E2	Synpo	SASPRPAPAETLRPFSPPQGPPPPPARMRSP	_PAPAETLRPFS(ph)PPQGPPPPPAR_	0.236958	1.23567	2.26909	-0.103477	0.736314		S	988	3	___1	1	UID1175	0.0749164	0.633292	-1.13236	-0.00296057
E9Q3E2	Synpo;Synpo	TLDSKPGTLCADDGQSPVPAEEVRSSILLID	_PGTLCADDGQS(ph)PVPAEEVR_	0.12514	NaN	0.736162	0.0987386	0.12514		S	375	2	___1	1	UID1176	0.0272956	NaN	-0.398456	-0.0936635
E9Q3E2	Synpo;Synpo	PVPRVAQKPALGRSTSFTENDLKEAKARSQQ	_STS(ph)FTENDLK_	-0.0834191	2.93661	-0.756937	0.604423	0.260502		S	134	2	___1	0.999952	UID1177	-0.061526	1.50365	0.316377	-0.320486
E9Q3E2	Synpo;Synpo	KYTTNAPGGFRVASLSPARTPPASLYHGYLP	_VASLS(ph)PAR_	0.068493	1.97255	0.489694	0.540163	0.514929		S	765	2	___1	1	UID1178	0.00317045	1.01035	-0.280457	-0.291663
E9Q3F7	Peg10;Peg10;Peg10	PPPPPNNNNNNNTPKSPGVPDAEDDDERRHD	_S(ph)PGVPDAEDDDER_	-6.80861	-4.63651	-4.76922	-5.52923	-5.14922	Down	S	30	2	___1	1	UID1179	-2.92566	-2.37146	2.23729	2.43074
E9Q3G8	Nup153	MSSPLADAKRIPSAVSSPLNSPLDRSGIDNT	_IPSAVS(ph)SPLNSPLDR_	-1.87217	-2.38597	-2.53924	-0.902062	-2.12907		S	334	2	___1	0.885808	UID1180	-0.82332	-1.21987	1.16967	0.355242
E9Q3G8	Nup153	SSPLADAKRIPSAVSSPLNSPLDRSGIDNTV	_IPSAVSS(ph)PLNSPLDR_	-1.85584	-2.44933	-1.68996	-2.17655	-2.0162		S	335	2	___1	0.996631	UID1181	-0.816367	-1.25229	0.763072	0.92691
E9Q3G8	Nup153	SSRASEKDIAVSKNTSLPPLWSPEAERSHSL	_NTS(ph)LPPLWSPEAER_	-0.286582	-0.462842	-0.0817901	NaN	-0.286582		S	204	2	___1	0.831208	UID1183	-0.148049	-0.235824	-0.00685457	#VALUE!
E9Q3G8	Nup153	KDIAVSKNTSLPPLWSPEAERSHSLSQHTAI	_NTSLPPLWS(ph)PEAER_	NaN	-0.765515	0.109387	-0.635613	-0.635613		S	210	2	___1	0.99997	UID1184	NaN	-0.390699	-0.098382	0.235727
E9Q3I3	Spata13;Spata13	RRRWGSGRRTRPRPLSDYGQLAGRSLSIPED	_PLS(ph)DYGQLAGR_	-1.79812	NaN	-1.36518	4.76784	-1.36518		S	559	2	___1	0.999999	UID1186	-0.791782	NaN	0.607579	-2.18797
Q8BXK8	Agap1;Agap1	GCPDERFVLMATPNLSRKSNSRNNSSGRAPS	_FVLMATPNLS(ph)R_	2.53758	0.917341	NaN	1.6654	1.6654		S	840	2	___1	0.869579	UID1187	1.05471	0.470407	#VALUE!	-0.796385
E9Q3L2	Pi4ka	LTASQLVPPDNQDTRSNLDITVGSRQQATQG	_S(ph)NLDITVGSR_	6.43677	2.14308	6.173	1.82463	4.15804	Up	S	1378	2	___1	1	UID1188	2.7153	1.09761	-3.00139	-0.867805
E9Q3P4	Cenpf;Cenpf	LRRDGSAAHFLGEEVSPNKSSMKTGRGDCSS	_DGSAAHFLGEEVS(ph)PNK_	-0.456299	0.387663	0.840709	1.29753	0.614186		S	247	2	___1	1	UID1190	-0.220328	0.199374	-0.448509	-0.631377
P59438	Hps5;Hps5;Hps5	KTFAMKDFPGISNTSSPTVKSNLGAHLLGET	_DFPGISNTSS(ph)PTVK_	-0.764424	NaN	-0.678235	2.15408	-0.678235		S	662	2	___1	0.949252	UID1193	-0.351553	NaN	0.278698	-1.01558
P59438	Hps5;Hps5;Hps5	SFVRKTTEKIGTLHGSPELKEPFESKDADRA	_IGTLHGS(ph)PELK_	0.752667	0.852084	2.25689	1.57279	1.21244		S	563	2	___1	0.999977	UID1195	0.294547	0.437015	-1.12652	-0.754845
P59438	Hps5;Hps5;Hps5	EAFLPFSIALPFRSPSPLVSLQAVKDSVSSF	_SPS(ph)PLVSLQAVK_	2.97698	2.07359	3.72184	0.158564	2.52529	Up	S	534	2	___1	0.99994	UID1196	1.24184	1.06205	-1.82787	-0.120498
E9Q411	Nbas	RVEMRAGEEDEGEVDSDSDPETSAKARYFGY	_AGEEDEGEVDS(ph)DSDPETSAK_	NaN	-0.080565	-0.1989	-0.182902	-0.182902		S	472	2	___1	0.910721	UID1199	NaN	-0.040215	0.0492126	0.0326651
E9Q4F8	Ankrd11;Ankrd11	GPFSLPELPLQAKDASDVEAEAAKASPVPPA	_DAS(ph)DVEAEAAK_	-1.41943	0.281577	-1.25706	1.15801	-0.487742		S	2160	2	___1	1	UID1203	-0.630506	0.145091	0.555816	-0.568794
E9Q4F8	Ankrd11;Ankrd11	NKSQFLDHEDTKFSLSDDQQERWFSDLSDSS	_FSLS(ph)DDQQER_	-0.47736	1.78236	-0.214585	4.31626	0.783887		S	859	2	___1	1	UID1204	-0.229298	0.913033	0.0567222	-1.98542
E9Q4F8	Ankrd11;Ankrd11	QQSNRKGETPLKVANSPTMVNLLLGKGTYTS	_VANS(ph)PTMVNLLLGK_	-0.14384	-0.41452	0.416226	-1.01521	-0.27918		S	297	2	___1	0.999968	UID1205	-0.0872582	-0.211097	-0.245284	0.405992
E9Q4K7	Kif13b	PRAPLLSEPASAVPTSPFRIRKVRTSELKSF	_APLLSEPASAVPTS(ph)PFR_	NaN	1.53609	3.42422	2.43295	2.43295		S	1654	2	___1	0.999405	UID1206	NaN	0.787014	-1.68538	-1.14067
E9Q4K7	Kif13b	LSPSHSLGSNKGRWESQQDVSQTLVSRGIAP	_WES(ph)QQDVSQTLVSR_	2.87859	1.56793	2.89925	2.70566	2.79212	Up	S	1409	2	___1	1	UID1207	1.19994	0.80331	-1.43405	-1.26299
E9Q4K7	Kif13b	SRRSISSPSMNRLSGSRQELSPSHSLGSNKG	_LSGS(ph)RQELSPSHSLGSNK_	2.64875	NaN	3.04762	2.18735	2.64875	Up	S	1390	3	___1	0.931504	UID1209	1.10205	NaN	-1.50508	-1.0305
E9Q4K7	Kif13b	PSRVRRAVGTGRRRSSGLQPQGAPEVRRSAT	_SS(ph)GLQPQGAPEVR_	-0.969323	-1.62238	-2.38224	-0.0812584	-1.29585		S	1795	2	___1	0.830991	UID1210	-0.438816	-0.829152	1.09451	-0.0129266
Q91VN4	Chchd6;Chchd6	AAEKHLKASLPKKKASLTHEQQQSARLAREL	_KAS(ph)LTHEQQQSAR_	-3.55681	-3.08153	-5.82249	-2.84064	-3.31917	Down	S	164	2	___1	0.999445	UID1211	-1.54078	-1.57579	2.74155	1.22478
E9Q4N7	Arid1b;Arid1b;Arid1b	EEEEDSEKIESEGKSSPALAAPDASVDPKET	_SS(ph)PALAAPDASVDPK_	NaN	-0.403737	-0.443795	5.36753	-0.403737		S	1757	2	___1	0.814629	UID1212	NaN	-0.20558	0.166458	-2.45696
Q8C405	Sp100;Sp100;Sp100;Sp100	SRKPPTLRRDRGGDTSDTESSIIIRRRKRTG	_GGDTS(ph)DTESSIIIR_	-4.46054	-2.79283	NaN	-7.27698	-4.46054	Down	S	314	2	___1	0.998064	UID1214	-1.92566	-1.42806	#VALUE!	3.21468
E9Q512	Trip11;Trip11	VPPPKLSVHGLKPLDSPGRRKADTGIPESFR	_LSVHGLKPLDS(ph)PGR_	0.342397	-0.021523	-0.0369807	-0.315949	-0.0292518		S	1888	3	___1	1	UID1215	0.119821	-0.0100037	-0.0283074	0.0923428
E9Q555	Rnf213;Rnf213	MARDFATPTLHTSDQSPGRQSVTIGEVVEED	_DFATPTLHTSDQS(ph)PGR_	-4.66286	-5.15199	-6.42115	-6.71218	-5.78657	Down	S	2234	2	___1	1	UID1216	-2.01182	-2.63523	3.02816	2.96135
E9Q555	Rnf213;Rnf213	TAGKETGEDVRKPKPSPVSPVASKHGDQEAE	_KPKPS(ph)PVS(ph)PVASK_	-5.25489	-7.6749	-6.61454	-7.44258	-7.02856	Down	S	271	2	___1	1	UID1217	-2.26396	-3.92619	3.12075	3.28896
E9Q555	Rnf213;Rnf213	KETGEDVRKPKPSPVSPVASKHGDQEAELKG	_KPKPS(ph)PVS(ph)PVASK_	-7.25416	-6.74927	-6.10401	-5.61104	-6.42664	Down	S	274	2	___1	0.999982	UID1218	-3.11541	-3.45255	2.87633	2.46744
E9Q555	Rnf213;Rnf213	TSGQEKKVPPIDAAASPVKTAGKETGEDVRK	_VPPIDAAAS(ph)PVK_	-6.10861	-6.41478	-2.74391	-4.6833	-5.39595	Down	S	252	2	___1	1	UID1219	-2.62754	-3.28139	1.26766	2.0513
E9Q577	Uimc1;Uimc1;Uimc1	SRASVWHSETKDFQKSPIKSLKQKLLLEEEP	_DFQKS(ph)PIK_	0.206266	-0.352255	-0.0015554	-0.808953	-0.176905		S	379	2	___1	1	UID1220	0.0618453	-0.179237	-0.0452676	0.313478
E9Q577	Uimc1;Uimc1	SREMQSTLSQLNLNESPIKSFVPVSEATNCL	_EMQSTLSQLNLNES(ph)PIK_	NaN	-1.29912	1.03954	-1.38405	-1.29912		S	689	2	___1	1	UID1221	NaN	-0.663739	-0.543698	0.571434
H3BLK8	Zfhx4;Zfhx4;Zfhx4	TPVSKTAELSPKNLLSPSSFKAECPEDVENL	_NLLS(ph)PSSFK_	0.39928	1.22328	1.87247	1.10422	1.16375		S	2762	2	___1	0.995979	UID1224	0.144046	0.626953	-0.942473	-0.544666
E9Q5C9	Nolc1	ANGTPASLNGKAAKESEEEEEEEETEEKKKA	_AAKES(ph)EEEEEEEETEEK_	-0.97967	-1.00012	-0.814227	-1.87973	-0.989895		S	563	3	___1	1	UID1226	-0.443222	-0.510745	0.343806	0.793771
E9Q5C9	Nolc1	RHEKTKKKRGSYRGGSISVQVNSVKFDSE__	_GGS(ph)ISVQVNSVK_	2.63959	NaN	-1.34394	-2.09587	-1.34394		S	689	2	___1	0.999994	UID1227	1.09815	NaN	0.597412	0.890719
E9Q5C9	Nolc1	SSEDEAPAKPVSTTKSPKPAVTPKPSAAKAV	_S(ph)PKPAVTPK_	-1.44432	0.552663	-0.07008	-2.08649	-0.7572		S	394	2	___1	1	UID1228	-0.641109	0.283803	-0.0124609	0.886511
E9Q5C9	Nolc1	VREEEIEVDSRVADNSFDAKRGAAGDWGERA	_VADNS(ph)FDAKR_	-0.561104	-0.170525	0.993244	-1.55476	-0.365815		S	646	2	___1	1	UID1229	-0.264963	-0.086247	-0.521536	0.648005
Q63943	Mef2d;Mef2d;Mef2d;Mef2d	TPSLVTSSLTDPRLLSPQQPALQRNSVSPGL	_LLS(ph)PQQPALQR_	-0.239872	-0.0949233	-0.0787002	1.61156	-0.0868117		S	180	2	___1	1	UID1230	-0.128156	-0.047562	-0.0083339	-0.772234
Q63943	Mef2d;Mef2d;Mef2d;Mef2d	PVANGNSLNKVIPAKSPPPPTHNTQLGAPSR	_VIPAKS(ph)PPPPTHNTQLGAPSR_	0.268649	-1.29015	0.152209	0.499904	0.210429		S	251	3	___1	0.999996	UID1231	0.088413	-0.659153	-0.118884	-0.273605
E9Q5F9	Setd2;Setd2	ESKRTSEHETIKRCCSPPNELGFRRGSSYSK	_CCS(ph)PPNELGFR_	-0.0665982	-1.05144	-0.0515733	NaN	-0.0665982		S	532	2	___1	1	UID1232	-0.0543623	-0.537005	-0.0213211	#VALUE!
E9Q5F9	Setd2;Setd2	SNQLNDSPTFKKLDESPVLKPEFIGHDGRES	_LDES(ph)PVLKPEFIGHDGR_	NaN	-0.957659	-0.892277	-1.48546	-0.957659		S	633	3	___1	1	UID1234	NaN	-0.489018	0.381173	0.616922
K4DI61	Phf10	_____MAAAGPGAALSPGRCDSDPASPGAQS	_MAAAGPGAALS(ph)PGR_	0.658854	0.95072	0.536651	-1.06937	0.597753		S	11	2	___1	1	UID1237	0.254594	0.487486	-0.302938	0.430285
E9Q5N9	Zfp395	PTTTSSLSPVRSRSLSFSEPQQPPPTVKSHL	_SLS(ph)FSEPQQPPPTVK_	-0.712481	1.94456	NaN	3.14137	1.94456		S	444	2	___1	0.949781	UID1238	-0.329432	0.996027	#VALUE!	-1.45843
E9Q5W5	Zzef1;Zzef1	RPPFTRGRLRLLSFRSMEETRPVPTVKEKYP	_S(ph)MEETRPVPTVK_	0.451301	1.31595	-0.324114	1.03873	0.745016		S	1538	2	___1	1	UID1239	0.166201	0.67437	0.10916	-0.515295
E9Q616	Ahnak	AEGPEVSLPKADLDVSGPKVDIDVPDVNIEG	_ADLDVS(ph)GPK_	2.28457	1.82885	3.59622	2.2211	2.25284	Up	S	1283	2	___1	1	UID1240	0.946955	0.936817	-1.76773	-1.04564
E9Q616	Ahnak	FDIKSPKFKAEAPLPSPKLEGEIKVPDVDIS	_FKAEAPLPS(ph)PK_	2.04146	1.6023	3.02945	0.75018	1.82188		S	4890	2	___1	1	UID1241	0.843421	0.820894	-1.49639	-0.385865
E9Q616	Ahnak	KIKMPKFGMPGFKAESPEMEVNLPKSDIDVS	_AES(ph)PEMEVNLPK_	-0.408569	1.60644	-1.08518	1.30357	0.4475		S	893	2	___1	1	UID1242	-0.200001	0.823016	0.473527	-0.634084
E9Q616	Ahnak	SGSKGDLKSSKASLGSLEGEVEAEASSPKGK	_AS(ph)LGS(ph)LEGEVEAEASSPK_	2.09131	0.637077	0.817402	0.0780067	0.72724		S	5525	2	___1	0.999799	UID1243	0.864652	0.326997	-0.43735	-0.0843643
E9Q616	Ahnak	ASLGSLEGEVEAEASSPKGKFSLFKSKKPRH	_ASLGSLEGEVEAEASS(ph)PK_	NaN	0.703933	0.354532	0.804173	0.703933		S	5536	2	___1	0.99781	UID1245	NaN	0.361207	-0.215747	-0.410083
E9Q616	Ahnak;Ahnak	AQRDDGVFVQEVMQNSPAARTGVVKEGDQIV	_DDGVFVQEVMQNS(ph)PAAR_	-0.423974	1.49079	-0.244854	-0.870732	-0.334414		S	42	2	___1	1	UID1246	-0.206562	0.763836	0.0712136	0.341189
E9Q616	Ahnak	VDVTGREGVKDIDITSPEFMIKIPRHEVTEI	_DIDITS(ph)PEFMIK_	NaN	0.677912	-2.59735	0.882255	0.677912		S	178	2	___1	0.999783	UID1247	NaN	0.347892	1.19749	-0.445107
E9Q616	Ahnak	KPRHRSNSFSDEREFSAPSTPTGTLEFAGGD	_EFS(ph)APST(ph)PTGTLEFAGGDAK_	3.55305	1.60756	4.31851	1.55634	2.58031		S	5563	2	___1	1	UID1248	1.48718	0.823586	-2.11354	-0.747463
E9Q616	Ahnak	GKHGKLKFGTFGGLGSKSKGHYEVTGSDDEA	_FGTFGGLGS(ph)K_	2.48383	1.6236	2.67547	1.38572	2.05371		S	5596	2	___1	1	UID1250	1.03182	0.831796	-1.32691	-0.670934
E9Q616	Ahnak	GKAKKSRFKLPKFNFSGSKVQTPEVDVKLKK	_FNFS(ph)GSK_	3.12839	NaN	3.06374	2.22701	3.06374	Up	S	3088	2	___1	0.999764	UID1251	1.30632	NaN	-1.5128	-1.04829
E9Q616	Ahnak	DLELKGPKVKGAFDGSVPKIEGTLKGPEIDM	_GAFDGS(ph)VPKIEGTLK_	4.14198	-0.577841	NaN	-0.0643706	-0.0643706		S	4648	2	___1	1	UID1253	1.73799	-0.294668	#VALUE!	-0.0205015
E9Q616	Ahnak	MNLKGPSLKGDLGASSPSMKLHAPGLDLKGV	_GDLGASS(ph)PSMK_	4.44041	1.28379	4.54217	0.876786	2.8621		S	5099	2	___1	0.991625	UID1254	1.86509	0.657914	-2.22061	-0.442654
E9Q616	Ahnak	LKGPSLKGDLGASSPSMKLHAPGLDLKGVGG	_GDLGASSPS(ph)MK_	2.91322	1.52118	3.45579	1.00244	2.2172		S	5101	2	___1	0.997923	UID1255	1.21468	0.779386	-1.7005	-0.499014
E9Q616	Ahnak	SGQISGPEIKGDLKGSGLGLHGAVPDIGVKG	_GS(ph)GLGLHGAVPDIGVK_	4.67915	0.695139	4.83132	-0.272514	2.68714		S	5303	3	___1	1	UID1256	1.96676	0.356707	-2.35905	0.0728604
E9Q616	Ahnak;Ahnak	GHHTVGLKLHRKGDRSPEPGQTWTHEVFSSR	_KGDRS(ph)PEPGQTWTHEVFSSR_	0.529783	0.388399	0.160926	0.133279	0.274663		S	94	3	___1	1	UID1257	0.199625	0.199751	-0.123057	-0.109156
E9Q616	Ahnak	KHIFSKSKGKGGVTGSPEASISGSKGDLKSS	_GGVTGS(ph)PEASISGSK_	2.01112	0.522627	2.52198	-0.08771	1.26687		S	5504	2	___1	1	UID1258	0.830499	0.268434	-1.25343	-0.0100327
E9Q616	Ahnak	SKSKGKGGVTGSPEASISGSKGDLKSSKASL	_GGVTGS(ph)PEAS(ph)IS(ph)GSKGDLK_	3.11315	3.3845	7.35554	2.93528	3.24883	Up	S	5508	2	___1	0.998267	UID1259	1.29983	1.73283	-3.56754	-1.36598
E9Q616	Ahnak	SKGKGGVTGSPEASISGSKGDLKSSKASLGS	_GGVTGSPEASIS(ph)GSKGDLK_	6.22323	3.77688	6.15784	3.03531	4.96736	Up	S	5510	2	___1	0.991821	UID1260	2.62436	1.93361	-2.99413	-1.41085
E9Q616	Ahnak	GKGGVTGSPEASISGSKGDLKSSKASLGSLE	_GGVT(ph)GSPEASISGS(ph)KGDLK_	5.98479	3.67673	7.45539	3.04173	4.83076	Up	S	5512	2	___1	0.998587	UID1261	2.52281	1.88237	-3.61534	-1.41373
E9Q616	Ahnak	GGLGSKSKGHYEVTGSDDEAGKLQGSGVSLA	_GHYEVTGS(ph)DDEAGK_	1.22041	1.48181	1.16731	0.743002	1.19386		S	5607	3	___1	1	UID1262	0.49375	0.759241	-0.604871	-0.382645
E9Q616	Ahnak	PNIEGDLKGPSLDIKSPKLDVNAPDIDVHGP	_GPSLDIKS(ph)PK_	-2.25258	0.407483	-2.02027	0.276217	-0.872027		S	2985	2	___1	1	UID1264	-0.98533	0.209516	0.921208	-0.173271
E9Q616	Ahnak	KFSLFKSKKPRHRSNSFSDEREFSAPSTPTG	_SNS(ph)FSDER_	0.353912	0.746197	0.158662	0.431126	0.392519		S	5555	2	___1	0.999999	UID1266	0.124725	0.382833	-0.121973	-0.242755
E9Q616	Ahnak	PKISSPSGKIGACRISMADVDLNVAAPKGKG	_IS(ph)MADVDLNVAAPK_	4.23365	1.4166	3.51064	-0.516809	2.46362		S	576	2	___1	1	UID1267	1.77703	0.725872	-1.72676	0.182438
E9Q616	Ahnak	PKFKMPEMNIKAPKISMPDLHLKGPKVKGDV	_IS(ph)M(ox)PDLHLK_	5.12769	4.26142	4.30459	3.21559	4.28301	Up	S	1321	3	___1	1	UID1269	2.15779	2.18155	-2.10687	-1.49171
E9Q616	Ahnak	QKPKISMQDVDLSLGSCKLKGNMKTSAPEVK	_ISM(ox)QDVDLSLGS(ph)CK_	3.90878	2.36921	2.84935	NaN	2.84935	Up	S	517	2	___1	0.997793	UID1271	1.63868	1.21332	-1.41016	#VALUE!
E9Q616	Ahnak	SLNLDTSKLAGNLHFSGPKIEGDVKGGQTGL	_LAGNLHFS(ph)GPK_	3.40927	2.3771	3.24813	0.582248	2.81262	Up	S	5393	2	___1	1	UID1272	1.42594	1.21735	-1.60108	-0.31054
E9Q616	Ahnak	GGLSTSDMKLEGPHLSLKGPGVDLPSVDLSM	_LEGPHLS(ph)LK_	3.1006	-2.18744	2.62836	-2.67502	0.22046		S	5059	2	___1	1	UID1273	1.29449	-1.11829	-1.30436	1.15049
E9Q616	Ahnak	TDVETQPGKTVIRLPSGSGPASPTTGSAVDI	_LPS(ph)GSGPASPTTGSAVDIR_	1.09644	-0.740197	0.203927	-0.909095	-0.268135		S	211	2	___1	0.9999	UID1275	0.440952	-0.377744	-0.143644	0.358396
E9Q616	Ahnak	VETQPGKTVIRLPSGSGPASPTTGSAVDIRA	_LPS(ph)GS(ph)GPAS(ph)PTTGSAVDIR_	1.01767	NaN	-0.0550271	-1.01739	-0.0550271		S	213	2	___1	0.999819	UID1276	0.407407	NaN	-0.0196676	0.406972
E9Q616	Ahnak	PGKTVIRLPSGSGPASPTTGSAVDIRAGAIS	_LPSGS(ph)GPAS(ph)PTTGSAVDIR_	-0.403281	0.616323	0.222157	0.345801	0.283979		S	217	2	___1	0.999999	UID1277	-0.197749	0.316378	-0.152372	-0.204482
E9Q616	Ahnak	YEVTGSDDEAGKLQGSGVSLASKKSRLSSSS	_LQGS(ph)GVS(ph)LAS(ph)KK_	0.733556	0.789328	1.90906	0.403615	0.761442		S	5617	2	___1	1	UID1279	0.286408	0.404903	-0.959991	-0.230414
E9Q616	Ahnak	TGSDDEAGKLQGSGVSLASKKSRLSSSSSND	_LQGS(ph)GVS(ph)LAS(ph)KK_	NaN	-0.0325887	2.61915	1.09157	1.09157		S	5620	2	___1	1	UID1280	NaN	-0.0156659	-1.29995	-0.538995
E9Q616	Ahnak	DDEAGKLQGSGVSLASKKSRLSSSSSNDSGT	_LQGS(ph)GVS(ph)LAS(ph)KK_	3.60236	1.09039	4.23708	0.477664	2.34638		S	5623	2	___1	1	UID1281	1.50818	0.558953	-2.07455	-0.263629
E9Q616	Ahnak	DYQRIYTTKIKPRLRSEDGVEGDLGETQSRT	_LRS(ph)EDGVEGDLGETQSR_	1.12551	2.0152	1.80399	0.537409	1.46475		S	136	3	___1	1	UID1282	0.453333	1.03217	-0.909689	-0.290427
E9Q616	Ahnak	LQMPGIKASGCDVKLSSGQISGPEIKGDLKG	_LS(ph)SGQISGPEIK_	3.96456	0.727322	3.48235	0.520068	2.10484		S	5287	2	___1	0.985701	UID1283	1.66243	0.373175	-1.71321	-0.282649
E9Q616	Ahnak	VQGKVKGSKFKMPFLSISSPKVSMPDVELNL	_MPFLS(ph)ISSPK_	0.95659	2.47926	2.82716	0.312838	1.71793		S	3137	2	___1	0.99995	UID1285	0.381394	1.26963	-1.39954	-0.189697
E9Q616	Ahnak	GKVKGSKFKMPFLSISSPKVSMPDVELNLKG	_MPFLSIS(ph)SPK_	1.03703	2.4359	1.66331	0.585401	1.35017		S	3139	2	___1	0.875014	UID1286	0.41565	1.24744	-0.842335	-0.311954
E9Q616	Ahnak	KVKGSKFKMPFLSISSPKVSMPDVELNLKGP	_MPFLSISS(ph)PK_	1.03347	2.44692	1.60101	0.342319	1.31724		S	3140	2	___1	0.999726	UID1287	0.414136	1.25308	-0.812511	-0.202921
E9Q616	Ahnak	EGPDAKLSGPNLKMPSLEVSVPKITGPDANV	_MPS(ph)LEVSVPK_	1.10416	0.346604	1.52395	0.241586	0.725382		S	4686	2	___1	1	UID1288	0.444243	0.178364	-0.775614	-0.157737
E9Q616	Ahnak	WTHEVFSSRSSEVVLSGDDEDYQRIYTTKIK	_SSEVVLS(ph)GDDEDYQR_	-5.12826	-2.35566	1.93036	5.88466	-0.21265		S	116	2	___1	1	UID1289	-2.21003	-1.20437	-0.970187	-2.68892
E9Q616	Ahnak	GPEVDVNLPKVDLDVSGPKVDIDVPDVNIEG	_VDLDVS(ph)GPK_	2.25173	3.70686	3.50247	1.86408	2.8771	Up	S	3744	2	___1	1	UID1290	0.932968	1.89778	-1.72285	-0.8855
E9Q616	Ahnak	GHSKFQVTVPGAKVGSLDVNVKAKGLDLGGK	_VGS(ph)LDVNVK_	1.7381	-0.0191674	NaN	-0.104282	-0.0191674		S	257	2	___1	1	UID1291	0.714224	-0.00879832	#VALUE!	-0.00259924
E9Q6B2	Ccdc85c	GPHKVPDGKAGATRRSLDDLSAPPHHRSIPN	_S(ph)LDDLSAPPHHR_	0.394371	-2.44705	NaN	-1.57583	-1.57583		S	247	3	___1	1	UID1292	0.141956	-1.25113	#VALUE!	0.657457
K3W4S4	Mapk8ip3;Mapk8ip3;Mapk8ip3	STIWQFFSRLFSSSSSPPPAKRSYPSVNIHY	_LFSSSSS(ph)PPPAK_	NaN	-0.54634	1.18279	2.49171	1.18279		S	594	2	___1	0.999089	UID1293	NaN	-0.278549	-0.612284	-1.16702
K3W4S4	Mapk8ip3;Mapk8ip3;Mapk8ip3;Mapk8ip3	ELDVCPETRLERTGSSPTQGIVNKAFGINTD	_TGSS(ph)PTQGIVNK_	0.2189	-0.544493	0.302423	0.0354927	0.127196		S	374	2	___1	0.974183	UID1294	0.0672257	-0.277604	-0.1908	-0.0652948
E9Q6C7	Lphn2;Lphn2;Lphn2	ADDHLQSPNRDSLYTSMPNLRDSPYPESSPD	_DSLYTS(ph)MPNLR_	0.308873	-0.812741	2.13353	-0.479464	-0.0852955		S	1402	2	___1	0.951778	UID1295	0.105544	-0.414864	-1.06746	0.165687
E9Q6C7	Lphn2;Lphn2;Lphn2	AGRHLHMCYQISRGNSDGYIIPINKEGCIPE	_GNS(ph)DGYIIPINK_	1.41897	0.0690219	2.47939	-0.0922413	0.743996		S	1458	2	___1	1	UID1296	0.578311	0.0363276	-1.23304	-0.00800025
E9Q6E5	Srsf11;Srsf11;Srsf11;Srsf11;Srsf11	KQVTRDYDEEEQGYDSEKEKKEEKRPTEAVS	_DYDEEEQGYDS(ph)EKEK_	0.573744	-0.205795	-1.24391	0.00768121	-0.0990569		S	462	2	___1	0.999989	UID1297	0.218347	-0.104294	0.549521	-0.0528201
E9Q6E5	Srsf11;Srsf11;Srsf11;Srsf11	STVDPKLNHVAAGLVSPSLKSDTSSKEIEEA	_LNHVAAGLVS(ph)PSLK_	-0.745545	-0.49819	-0.533992	-0.53377	-0.533881		S	235	2	___1	0.999999	UID1298	-0.343513	-0.253911	0.20964	0.190046
E9Q6E5	Srsf11;Srsf11;Srsf11;Srsf11	VDPKLNHVAAGLVSPSLKSDTSSKEIEEAMK	_LNHVAAGLVSPS(ph)LK_	-0.881304	-0.430163	-0.743112	-0.591055	-0.667083		S	237	3	___1	0.897545	UID1299	-0.40133	-0.219102	0.309758	0.215741
E9Q6E5	Srsf11;Srsf11;Srsf11;Srsf11;Srsf11	SEKEKKEEKRPTEAVSPKTKECSVEKGVGDL	_RPTEAVS(ph)PK_	-0.442868	-0.494091	-0.684935	-0.326491	-0.468479		S	477	2	___1	1	UID1300	-0.214609	-0.251814	0.281906	0.0970714
E9Q6E5	Srsf11	_____________MSSPPAPGTAGPTSPSVA	_(ac)SS(ph)PPAPGTAGPTSPSVALTNLALR_	-1.85191	-0.875147	-1.30869	-0.692738	-1.09192		S	3	2	___1	0.87971	UID1301	-0.814692	-0.446797	0.580531	0.26135
F8VQD7	Ptprg;Ptprg;Ptprg	CFSAQKECNKEKNRNSSVVPAERARVGLAPL	_NRNS(ph)SVVPAER_	2.34828	1.96779	3.12726	2.28649	2.31738	Up	S	1179	2	___1	0.999632	UID1303	0.974089	1.00791	-1.54321	-1.07497
E9Q6J5	Bod1l	KVSKSPPLGRSKAQLSPSVKRKREVSPPGAR	_AQLS(ph)PSVK_	-0.781236	-1.00088	-0.36463	-0.606252	-0.693744		S	3000	2	___1	0.993812	UID1304	-0.358713	-0.511135	0.128557	0.222557
E9Q6J5	Bod1l	SKTNSSTGLEDRDEFSSSEGTGEKTEPNEDD	_DEFS(ph)SSEGTGEK_	-0.202684	-0.85615	0.165886	0.00718068	-0.0977517		S	2777	2	___1	0.993537	UID1306	-0.112319	-0.437076	-0.125431	-0.0525956
E9Q6J5	Bod1l	PSTRATSKLGIPETISPRNRQKLAKEKLSTS	_LGIPETIS(ph)PR_	-1.57849	-1.10889	-0.711585	-2.24899	-1.34369		S	2968	2	___1	0.99977	UID1307	-0.698248	-0.5664	0.294665	0.959399
E9Q6J5	Bod1l	HTHGKGEPSRPARRLSESLHSADENKTESKV	_RLS(ph)ESLHSADENK_	-1.13012	NaN	0.514427	-0.564635	-0.564635		S	632	3	___1	0.953765	UID1308	-0.507296	NaN	-0.292298	0.20389
E9Q6J5	Bod1l	HGKGEPSRPARRLSESLHSADENKTESKVER	_RLSES(ph)LHSADENK_	-1.03151	-1.1818	-0.896439	-0.679024	-0.963974		S	634	3	___1	0.999925	UID1309	-0.465301	-0.603709	0.383165	0.255199
E9Q6L0	Clasp1;Clasp1;Clasp1;Clasp1	SLRGVTEAIEKFSFRSQEDLNEPIKRDGKKD	_S(ph)QEDLNEPIKR_	0.610235	-0.017863	1.52544	0.12801	0.369123		S	1126	2	___1	1	UID1315	0.233888	-0.00813082	-0.77633	-0.106793
E9Q6L0	Clasp1;Clasp1;Clasp1;Clasp1	LLHNHLKNSSNTGVGSPSNTIGRTPSRHPSS	_NSSNTGVGS(ph)PSNTIGR_	2.54491	1.04544	2.80451	0.946919	1.79517		S	1060	2	___1	0.992954	UID1316	1.05783	0.535953	-1.3887	-0.474112
E9Q6L0	Clasp1;Clasp1;Clasp1	EYVGLDAGRIRTRRQSSGSTTNVASTPSDSR;PGSYASLGRIRTRRQSSGSTTNVASTPSDSR	_RQS(ph)SGSTTNVASTPSDSR_	-2.49505	-2.35157	-1.81193	-1.39097	-2.08175		S	662	2	___1	0.997452	UID1317	-1.08859	-1.20227	0.821465	0.574538
E9Q6L0	Clasp1;Clasp1;Clasp1;Clasp1	STKSVSTTGSLQRSRSDIDVNAAASAKSKVS	_SRS(ph)DIDVNAAASAK_	1.38499	0.303167	0.612543	-0.180385	0.457855		S	600	2	___1	0.999534	UID1318	0.563841	0.156138	-0.339272	0.0315363
E9Q6L0	Clasp1	PSDSRGRSRAKVVSQSQPGSRSSSPGKLLGS	_VVSQS(ph)QPGSR_	NaN	-0.851001	-0.845173	-1.4311	-0.851001		S	688	2	___1	0.999989	UID1319	NaN	-0.434442	0.358621	0.592541
E9Q6L0	Clasp1	RGRSRAKVVSQSQPGSRSSSPGKLLGSGLAG	_VVSQSQPGS(ph)R_	-0.550132	-0.886313	-1.05135	-0.523605	-0.718222		S	692	2	___1	1	UID1320	-0.26029	-0.452511	0.457332	0.185486
Q8BMG1	Atrip;Atrip	__MAGTPAPNSHRKQSGGLEPFPGLSRSIEN	_KQS(ph)GGLEPFPGLSR_	0.0678168	NaN	-0.25859	1.19187	0.0678168		S	14	3	___1	1	UID1321	0.00288247	NaN	0.0777899	-0.583982
Q8BMG1	Atrip;Atrip;Atrip	LSSAHKVRRLDGLPNSPIRKSREDIPVKDNF	_RLDGLPNS(ph)PIRK_	1.87667	NaN	1.4998	1.1106	1.4998		S	97	3	___1	1	UID1322	0.773237	NaN	-0.764052	-0.547531
Q80U78	Pum1;Pum1;Pum1	TAVANSNTGSGSRRDSLTGSSDLYKRTSSSL	_RDS(ph)LTGSSDLYK_	-1.7922	-0.899849	-1.99887	-0.330397	-1.34602		S	710	2	___1	0.99998	UID1323	-0.789262	-0.459437	0.910963	0.0988237
E9Q6P5	Ttc7b	YATKGLCLEKLPVSSSTSNLHVDREQDVITC	_LPVSSS(ph)TSNLHVDR_	4.59732	3.28285	1.69077	NaN	3.28285		S	160	2	___1	0.948147	UID1325	1.93191	1.68082	-0.855484	#VALUE!
E9Q6R7	Utrn	TLKKMLSESEKAAQASLNALNDPIAVEQALQ	_AAQAS(ph)LNALNDPIAVEQALQEK_	3.33354	0.187733	0.934344	-0.319868	0.561038		S	933	3	___1	1	UID1326	1.39369	0.0970713	-0.493337	0.0941009
P97467	Pam;Pam;Pam;Pam	ESSSGRVLGRLRGKGSSGLNLGNFFASRKGY	_GS(ph)SGLNLGNFFASR_	0.648616	-0.235899	-1.04124	2.6718	0.206358		S	924	2	___1	0.85715	UID1329	0.250234	-0.119698	0.45249	-1.2478
P51830	Adcy9;Adcy9	RESSGPRGQGTASPGSVSDLAQTVKTFDNLK	_GQGTASPGS(ph)VSDLAQTVK_	4.25355	0.86621	4.32517	1.42783	2.84069		S	613	2	___1	0.985841	UID1330	1.78551	0.444243	-2.11672	-0.689823
E9Q777	Akap11;Akap11	TNADYLTKTIKGKACSPSLCDQAAPQENKAS	_ACS(ph)PSLCDQAAPQENK_	1.22137	0.715323	1.4955	0.377197	0.968346		S	910	2	___1	0.999037	UID1331	0.49416	0.367036	-0.761996	-0.218565
E9Q777	Akap11;Akap11	ESQMTLGETPKFLDFSDNSPHRSLLVGNYCV	_FLDFS(ph)DNSPHR_	1.02736	0.558447	2.84983	-0.801179	0.792903		S	984	3	___1	0.997884	UID1332	0.411535	0.286763	-1.41039	0.309991
E9Q777	Akap11;Akap11	PLRSSHLKSKASVRKSFSEDVFRSVKSLLQS	_S(ph)FSEDVFR_	-2.86365	0.245653	-2.28166	NaN	-2.28166		S	21	2	___1	0.999833	UID1333	-1.24557	0.126709	1.04635	#VALUE!
E9Q784	Zc3h13	ASSAGKKERKAAVVASPLLDQQRNSKGNQSK	_KAAVVAS(ph)PLLDQQR_	-0.400678	-1.51968	-0.761048	-1.74116	-1.14036		S	242	2	___1	1	UID1334	-0.196641	-0.776602	0.318346	0.731618
E9Q784	Zc3h13	ERDRRDNRERDQRPSSPIRHQGRSEELERDE	_ERDQRPSS(ph)PIR_	-1.23446	-1.31506	-0.578482	-0.302647	-0.906471		S	704	3	___1	0.986231	UID1335	-0.551733	-0.671899	0.230941	0.0863762
E9Q784	Zc3h13	VERGNLETHEDSQVFSPKKGQKKKNIEKKRK	_GNLETHEDSQVFS(ph)PK_	-0.872769	-0.7744	-0.82584	-1.61978	-0.849305		S	1069	2	___1	1	UID1336	-0.397695	-0.395245	0.349365	0.67717
E9Q784	Zc3h13	GSNRSHRSHTSGRLRSPSNDSAHRSGDDQGS	_LRS(ph)PSNDSAHR_	-0.652111	0.155923	-1.01003	0.444551	-0.248094		S	1273	2	___1	0.993858	UID1338	-0.303721	0.0807941	0.437547	-0.248776
E9Q784	Zc3h13	NRSHRSHTSGRLRSPSNDSAHRSGDDQGSRK	_LRSPS(ph)NDSAHR_	-0.836901	0.229597	NaN	0.218277	0.218277		S	1275	2	___1	0.844764	UID1339	-0.382419	0.118493	#VALUE!	-0.147282
E9Q784	Zc3h13	GPSPRGKGYSSNYRRSPERPTGDLRERMKNK	_RS(ph)PERPTGDLR_	-1.12901	-1.25146	-0.90797	-0.346874	-1.01849		S	77	3	___1	0.99994	UID1342	-0.506824	-0.639355	0.388685	0.106214
E9Q784	Zc3h13	KHRLLSQVVRPQESRSLSPSHLTEDRQGRWK	_S(ph)LS(ph)PSHLTEDR_	NaN	-0.93229	-1.01581	-0.505168	-0.93229		S	951	2	___1	0.999906	UID1347	NaN	-0.476037	0.440314	0.177216
E9Q784	Zc3h13	RLLSQVVRPQESRSLSPSHLTEDRQGRWKEE	_SLS(ph)PSHLTEDR_	-0.696853	-0.80891	-0.764671	-0.736713	-0.750692		S	953	2	___1	0.999942	UID1348	-0.322776	-0.412904	0.32008	0.281075
Q8CD76	Klc1;Klc1;Klc1;Klc1;Klc1;Klc1	VLNDPESMEKRRSRESLNMDVVKYESGPDGG	_S(ph)RES(ph)LNMDVVK_	0.637205	NaN	1.72097	1.11413	1.11413		S	524	2	___1	1	UID1350	0.245374	NaN	-0.869939	-0.549113
Q8CD76	Klc1;Klc1;Klc1;Klc1;Klc1;Klc1	VAEVLNDPESMEKRRSRESLNMDVVKYESGP	_S(ph)RES(ph)LNMDVVK_	0.717686	0.972755	0.267203	1.19891	0.845221		S	521	2	___1	1	UID1351	0.27965	0.498761	-0.173938	-0.587143
Q8CD76	Klc1;Klc1;Klc1;Klc1;Klc1;Klc1	AFGEYGGWYKACKVDSPTVTTTLKNLGALYR	_VDS(ph)PTVTTTLK_	-0.267231	1.03355	-0.697549	1.39331	0.383159		S	460	2	___1	0.999979	UID1352	-0.139808	0.529871	0.287945	-0.674337
E9Q7D5	Arhgef5	RDGLLHEVASTLKRHSHPPPLTLSSGLHRSS	_RHS(ph)HPPPLTLSSGLHR_	NaN	1.81289	-0.485658	0.724437	0.724437		S	742	4	___1	0.99513	UID1354	NaN	0.928655	0.186501	-0.374318
E9Q7D5	Arhgef5	QSQQRLDSLAEPHGLSSPRHRRKALVSSDSY	_LDSLAEPHGLS(ph)SPR_	0.983529	2.04318	1.90982	0.827205	1.44667		S	1109	3	___1	0.845466	UID1355	0.392867	1.04649	-0.960356	-0.420414
E9Q7D5	Arhgef5	SQQRLDSLAEPHGLSSPRHRRKALVSSDSYL	_LDSLAEPHGLSS(ph)PR_	0.968273	1.99888	2.0478	0.81226	1.48358		S	1110	2	___1	0.998514	UID1356	0.38637	1.02382	-1.02641	-0.413711
E9Q7D5	Arhgef5	SEPPPLPPKSRGRSKSIQGGVIHSGGQAKPR	_S(ph)IQGGVIHSGGQAK_	-2.61598	-0.953665	-2.2936	-0.745172	-1.62363		S	851	2	___1	1	UID1357	-1.14009	-0.486974	1.05207	0.284869
E9Q7G0	Numa1;Numa1	QKKAAPVLKQADRRQSMAFSILNTPKKLGNS	_RQS(ph)MAFSILNTPK_	-3.23771	-0.421022	-4.55819	-1.55414	-2.39593		S	2029	2	___1	0.999998	UID1363	-1.40488	-0.214424	2.13626	0.647729
E9Q7G0	Numa1;Numa1	PRTQPDGTSVPGEPASPISQRLPPKVESLES	_TQPDGTSVPGEPAS(ph)PISQR_	-0.499551	-0.463507	-0.0199383	-0.590224	-0.481529		S	1739	2	___1	0.999994	UID1364	-0.238749	-0.236164	-0.0364666	0.215368
E9Q7G0	Numa1;Numa1	AEGVGITTRQQRKRVSSETHQGPGTPESKKA	_VS(ph)SETHQGPGTPESK_	2.15745	-0.0153122	2.41658	-3.94785	1.07107		S	1973	2	___1	0.917567	UID1365	0.892818	-0.0068256	-1.20297	1.72142
E9Q7G0	Numa1;Numa1	EGVGITTRQQRKRVSSETHQGPGTPESKKAT	_VSS(ph)ETHQGPGTPESK_	1.78159	0.179814	2.40088	-3.75521	0.980702		S	1974	3	___1	0.990267	UID1366	0.732747	0.0930192	-1.19545	1.63501
E9Q7L6	Foxn2	SAFSAPGAVRLQESPSPTAGIDPKADHNYSA	_LQESPS(ph)PTAGIDPK_	0.707625	-2.27629	NaN	-4.15841	-2.27629		S	289	2	___1	0.994886	UID1367	0.275365	-1.16375	#VALUE!	1.81586
E9Q7M2	Tsc22d2	QTQPLVGQVDDTRRKSEPLPQAPLSLIAESK	_S(ph)EPLPQAPLSLIAESK_	-3.22062	0.0824616	-3.97586	1.19563	-1.56908		S	587	2	___1	1	UID1368	-1.3976	0.0432045	1.85746	-0.58567
E9Q7Y3	Nav1	ASPQLRPRQQADLALSPQRGASPRRGKAAVS	_QQADLALS(ph)PQR_	-2.05011	-2.2236	-1.39235	-4.37479	-2.13685	Down	S	50	2	___1	1	UID1369	-0.899103	-1.13679	0.620586	1.91292
E9Q9C3	Mllt4;Mllt4;Mllt4	GAPENLTFKERQRLFSQGQDVSDKVKASRKL	_LFS(ph)QGQDVSDK_	-1.15035	-1.73986	-2.22733	-3.35768	-1.98359		S	1802	2	___1	1	UID1371	-0.515913	-0.889263	1.02034	1.4567
E9Q9C3	Mllt4;Mllt4;Mllt4;Mllt4	TESNHSSIAIQRVTRSQEELREEKVYQLERH	_S(ph)QEELREEK_	1.99298	0.574579	1.22931	0.609045	0.919177		S	1282	2	___1	1	UID1374	0.822771	0.295018	-0.634554	-0.322559
E9Q9C3	Mllt4;Mllt4;Mllt4;Mllt4	PGDDRLMKNRADHRSSPNVANQPPSPGGKGP	_SS(ph)PNVANQPPS(ph)PGGK_	-0.431919	-0.848069	NaN	0.964301	-0.431919		S	1180	2	___1	0.840368	UID1375	-0.209945	-0.432941	#VALUE!	-0.481908
E9Q9C3	Mllt4;Mllt4;Mllt4;Mllt4;Mllt4	EVYKDMPETSFTRTISNPEVVMKRRRQQKLE	_TIS(ph)NPEVVMK_	-0.287107	-1.21663	-1.20496	-0.421014	-0.812987		S	216	2	___1	0.999994	UID1377	-0.148273	-0.621533	0.53087	0.13947
E9Q9C3	Mllt4;Mllt4;Mllt4;Mllt4	PPPQRNASYLKTQVLSPDSLFTAKFVAYDEE	_TQVLS(ph)PDSLFTAK_	-1.78945	-0.4953	-2.60312	-0.317758	-1.14237		S	1726	2	___1	0.990059	UID1378	-0.788091	-0.252432	1.20025	0.0931544
Q3UXS0	Scamp3;Scamp3;Scamp3	LPPPSAPSVQSSRKLSPTEPRNYGSYSTQAS	_KLS(ph)PTEPR_	-1.00691	0.437316	-1.69209	0.988785	-0.284797		S	79	2	___1	0.999873	UID1379	-0.454822	0.224781	0.764091	-0.49289
E9Q8D0	Dnajc21;Dnajc21	LQEMEARYEKEFGDGSDENEVEDQEPRNGLD	_EFGDGS(ph)DENEVEDQEPR_	-1.44559	-1.08262	-1.37604	-1.94947	-1.41081		S	283	2	___1	1	UID1380	-0.641649	-0.55296	0.612777	0.825053
E9Q8L9	Rab11fip1;Rab11fip1	NSPSPQGFRRKHLFSSTENLAARSPKEPGEG	_HLFSS(ph)TENLAAR_	-3.49751	-3.00132	-3.40477	-0.915111	-3.20305	Down	S	358	2	___1	0.999814	UID1384	-1.51552	-1.53475	1.58405	0.361095
E9Q8L9	Rab11fip1	ARVPQTKAVKPRLEVSPEAQPKARLPSPDSA	_LEVS(ph)PEAQPK_	-4.79164	-2.40779	-4.67885	-0.706395	-3.54332	Down	S	541	2	___1	1	UID1385	-2.06667	-1.23104	2.19402	0.267476
E9Q8L9	Rab11fip1;Rab11fip1	TLFSKSSLQKTPLSQSMSVLPTSKSDKVLLR	_TPLSQS(ph)MSVLPTSK_	NaN	-2.36067	-0.881615	-0.652233	-0.881615		S	236	2	___1	0.955342	UID1387	NaN	-1.20693	0.376068	0.243182
E9Q8L9	Rab11fip1;Rab11fip1	FSKSSLQKTPLSQSMSVLPTSKSDKVLLRAG	_TPLSQSMS(ph)VLPTSK_	-1.62347	-1.61583	NaN	-0.150668	-1.61583		S	238	2	___1	0.862398	UID1388	-0.717406	-0.825798	#VALUE!	0.0182068
F7DCH5	Clasp2;Clasp2;Clasp2	ALDNKASLLHSMPLHSSPRSRDYNPYNYSDS	_ASLLHSM(ox)PLHS(ph)SPR_	2.01778	1.19742	3.03456	0.45274	1.6076		S	1025	3	___1	0.865504	UID1390	0.833335	0.61372	-1.49883	-0.252449
F7DCH5	Clasp2;Clasp2;Clasp2	ARSSRIPRPSVSQGCSREASRESSRDTSPVR	_IPRPSVS(ph)QGCS(ph)R_	NaN	0.926078	2.75715	0.328134	0.926078		S	535	2	___1	0.999948	UID1393	NaN	0.474877	-1.36602	-0.196558
F7DCH5	Clasp2;Clasp2;Clasp2	KTDSRGRSRTKMVSQSQPGSRSGSPGRVLTT	_M(ox)VSQS(ph)QPGSR_	0.530963	-0.187156	1.50769	0.00658023	0.268772		S	461	2	___1	0.999976	UID1395	0.200128	-0.094757	-0.76783	-0.0523263
F7DCH5	Clasp2;Clasp2;Clasp2	RGRSRTKMVSQSQPGSRSGSPGRVLTTTALS	_MVSQSQPGS(ph)R_	1.36937	0.764947	1.05871	0.902021	0.980366		S	465	2	___1	1	UID1396	0.55719	0.392427	-0.552876	-0.453972
F7DCH5	Clasp2;Clasp2;Clasp2	VGGSKANPLPGSLQRSRSDIDVNAAAGAKAH	_S(ph)RSDIDVNAAAGAK_	3.65951	NaN	3.83587	1.0204	3.65951		S	374	2	___1	0.970125	UID1397	1.53252	NaN	-1.88246	-0.50707
F7DCH5	Clasp2;Clasp2;Clasp2	GSKANPLPGSLQRSRSDIDVNAAAGAKAHHA	_SRS(ph)DIDVNAAAGAK_	3.80685	1.73114	3.34729	1.54055	2.53921		S	376	2	___1	0.999637	UID1398	1.59527	0.886823	-1.64855	-0.740384
F7DCH5	Clasp2;Clasp2;Clasp2	STVSSGAQRVLVNSASAQKRSKIPRSQGCSR	_VLVNSAS(ph)AQK_	1.76238	0.946494	3.52063	NaN	1.76238		S	495	2	___1	0.996701	UID1399	0.724563	0.485324	-1.73154	#VALUE!
E9Q8P8	Fam131b;Fam131b	SMEDTTSILPKLKRNSNAYGIGALAKSSFSG	_NS(ph)NAYGIGALAK_	NaN	2.64061	-0.639485	1.12771	1.12771		S	75	2	___1	0.999997	UID1401	NaN	1.35219	0.260146	-0.555206
E9Q8V6	Dennd4a	MYMNNMSSPLTSRTPSIDLQRACDDKLTNKK	_TPS(ph)IDLQR_	1.24629	1.31436	1.70641	2.36309	1.51038		S	1225	2	___1	1	UID1406	0.504773	0.673556	-0.862969	-1.10933
E9Q8X5	Zbtb10	VENYQMNDSNWIRDGSPELAENESQGKTKVF	_DGS(ph)PELAENESQGK_	0.0192947	0.214754	0.389307	0.417531	0.30203		S	537	2	___1	1	UID1407	-0.0177822	0.110898	-0.232396	-0.236656
E9Q8Z5	Ctnnd1;Ctnnd1;Ctnnd1;Ctnnd1;Ctnnd1;Ctnnd1;Ctnnd1;Ctnnd1;Ctnnd1;Ctnnd1;Ctnnd1;Ctnnd1;Ctnnd1;Ctnnd1;Ctnnd1;Ctnnd1	IEERYRPSMEGYRAPSRQDVYGPQPQVRVGG	_APS(ph)RQDVYGPQPQVR_	2.5002	1.75695	3.14197	-0.277709	2.12858		S	252	2	___1	1	UID1408	1.03879	0.900026	-1.55025	0.0751904
E9Q8Z5	Ctnnd1;Ctnnd1;Ctnnd1;Ctnnd1;Ctnnd1;Ctnnd1;Ctnnd1;Ctnnd1;Ctnnd1;Ctnnd1;Ctnnd1;Ctnnd1;Ctnnd1;Ctnnd1;Ctnnd1;Ctnnd1;Ctnnd1	PDQYYWAPLAQHERGSLASLDSLRKGMPPPS	_GS(ph)LAS(ph)LDS(ph)LRK_	0.765348	0.67148	0.991903	-0.290506	0.718414		S	346	2	___1	1	UID1409	0.299948	0.344601	-0.520894	0.0809306
E9Q8Z5	Ctnnd1;Ctnnd1;Ctnnd1;Ctnnd1;Ctnnd1;Ctnnd1;Ctnnd1;Ctnnd1;Ctnnd1;Ctnnd1;Ctnnd1;Ctnnd1;Ctnnd1;Ctnnd1;Ctnnd1;Ctnnd1;Ctnnd1	YYWAPLAQHERGSLASLDSLRKGMPPPSNWR	_GS(ph)LAS(ph)LDS(ph)LRK_	-0.0743459	0.153255	2.05917	-0.811799	0.0394545		S	349	2	___1	1	UID1410	-0.0576619	0.0794293	-1.03186	0.314755
E9Q8Z5	Ctnnd1;Ctnnd1;Ctnnd1;Ctnnd1;Ctnnd1;Ctnnd1;Ctnnd1;Ctnnd1;Ctnnd1;Ctnnd1;Ctnnd1;Ctnnd1;Ctnnd1;Ctnnd1;Ctnnd1;Ctnnd1	RHYEDGYPGGSDNYGSLSRVTRIEERYRPSM	_HYEDGYPGGSDNYGS(ph)LSR_	1.04388	1.13124	1.64001	-0.555127	1.08756		S	230	3	___1	0.971865	UID1412	0.418568	0.579856	-0.831178	0.199625
E9Q8Z5	Ctnnd1;Ctnnd1;Ctnnd1;Ctnnd1;Ctnnd1;Ctnnd1;Ctnnd1;Ctnnd1;Ctnnd1;Ctnnd1;Ctnnd1;Ctnnd1;Ctnnd1;Ctnnd1;Ctnnd1;Ctnnd1	YEDGYPGGSDNYGSLSRVTRIEERYRPSMEG	_HYEDGYPGGSDNYGSLS(ph)R_	0.995891	1.00569	1.82672	-0.50403	1.00079		S	232	2	___1	0.938202	UID1413	0.398131	0.515612	-0.920571	0.176706
E9Q8Z5	Ctnnd1;Ctnnd1;Ctnnd1;Ctnnd1;Ctnnd1;Ctnnd1;Ctnnd1;Ctnnd1;Ctnnd1;Ctnnd1;Ctnnd1;Ctnnd1;Ctnnd1;Ctnnd1;Ctnnd1;Ctnnd1;Ctnnd1	STLNERGDHNRTLDRSGDLGDMEPLKGAPLM	_S(ph)GDLGDMEPLK_	0.303201	1.85421	0.203827	0.714821	0.509011		S	920	2	___1	1	UID1414	0.103128	0.949796	-0.143596	-0.370005
E9Q8Z5	Ctnnd1;Ctnnd1;Ctnnd1;Ctnnd1;Ctnnd1;Ctnnd1;Ctnnd1;Ctnnd1;Ctnnd1;Ctnnd1;Ctnnd1;Ctnnd1;Ctnnd1;Ctnnd1;Ctnnd1;Ctnnd1	RQDVYGPQPQVRVGGSSVDLHRFHPEPYGLE	_VGGS(ph)S(ph)VDLHR_	1.72071	0.991846	2.29823	-0.544186	1.35628		S	268	2	___1	1	UID1415	0.706818	0.50853	-1.14631	0.194718
E9Q8Z5	Ctnnd1;Ctnnd1;Ctnnd1;Ctnnd1;Ctnnd1;Ctnnd1;Ctnnd1;Ctnnd1;Ctnnd1;Ctnnd1;Ctnnd1;Ctnnd1;Ctnnd1;Ctnnd1;Ctnnd1;Ctnnd1	QDVYGPQPQVRVGGSSVDLHRFHPEPYGLED	_VGGS(ph)S(ph)VDLHR_	-0.0652266	0.798258	0.416047	-1.58865	0.17541		S	269	2	___1	1	UID1416	-0.0537782	0.409472	-0.245198	0.663208
E9Q8Z5	Ctnnd1;Ctnnd1;Ctnnd1;Ctnnd1;Ctnnd1	EERRHVSAQLERVRVSPQDANSLMANGTLTR	_VS(ph)PQDANSLMANGTLTR_	-1.1205	-0.64656	-0.69977	-1.35906	-0.910135		S	47	2	___1	0.999999	UID1417	-0.5032	-0.32983	0.289008	0.560226
E9Q8Z5	Ctnnd1;Ctnnd1;Ctnnd1;Ctnnd1;Ctnnd1	SAQLERVRVSPQDANSLMANGTLTRRHQNGR	_VSPQDANS(ph)LM(ox)ANGTLTR_	1.79969	-0.887934	1.9035	NaN	1.79969		S	53	2	___1	0.978614	UID1418	0.740453	-0.45334	-0.957328	#VALUE!
E9QK41	Ablim1;Ablim1;Ablim1;Ablim1;Ablim1;Ablim1;Ablim1;Ablim1;Ablim1;Ablim1;Ablim1	LPDGHMPAVRMDRGVSMPNMLEPKIFPYEML	_GVS(ph)MPNM(ox)LEPK_	2.93432	0.70503	4.87728	-1.73011	1.81967		S	596	2	___1	1	UID1419	1.22367	0.361768	-2.38105	0.726657
Q80TM6	R3hdm2;R3hdm2;R3hdm2;R3hdm2	SDGSVRSMRPPVTKASSFSGISILTRGDSIG	_AS(ph)SFSGISILTR_	0.872331	0.933979	1.17318	0.35337	0.903155		S	380	2	___1	0.907946	UID1420	0.34551	0.47892	-0.607683	-0.207878
Q80TM6	R3hdm2;R3hdm2;R3hdm2;R3hdm2	DGSVRSMRPPVTKASSFSGISILTRGDSIGS	_ASS(ph)FSGISILTR_	1.1778	1.2691	1.09938	0.253772	1.13859		S	381	2	___1	0.998565	UID1421	0.475604	0.650397	-0.572351	-0.163203
Q80TM6	R3hdm2;R3hdm2;R3hdm2;R3hdm2	LKHGNRGKRQALKSASTDLGTADVVLGRVLE	_SAS(ph)TDLGTADVVLGR_	-0.214827	1.69663	0.805225	NaN	0.805225		S	923	2	___1	0.9676	UID1422	-0.11749	0.869161	-0.43152	#VALUE!
E9Q9R9	Dlg5;Dlg5;Dlg5	ASQGSNSLPSSARLGSSSNLQFKAERIKIPL	_LGS(ph)SSNLQFK_	3.2128	2.18026	3.82091	3.12753	3.17016	Up	S	1263	2	___1	0.99998	UID1423	1.34227	1.11663	-1.8753	-1.45221
E9Q9R9	Dlg5;Dlg5;Dlg5	RENGKLRRERNLLQQSWEDMKRLREEDQKEI	_NLLQQS(ph)WEDM(ox)KR_	NaN	0.838932	1.52116	1.57442	1.52116		S	264	3	___1	1	UID1424	NaN	0.430285	-0.774281	-0.755576
E9Q9R9	Dlg5;Dlg5;Dlg5	GPEKLSVYKKPKQRKSIFDPNTFKRPQTPPK	_S(ph)IFDPNTFK_	-3.9453	-2.48182	-3.75964	0.324892	-3.12073	Down	S	972	2	___1	1	UID1426	-1.70623	-1.26892	1.75395	-0.195104
E9Q9Q2	R3hdm1	SDSSLRNLKPAVTKASSFSGISVLTRGDSSG	_AS(ph)SFSGISVLTR_	0.856565	0.99739	0.480449	0.472879	0.668507		S	380	2	___1	0.951363	UID1428	0.338795	0.511367	-0.276031	-0.261483
E9Q9Q2	R3hdm1	DSSLRNLKPAVTKASSFSGISVLTRGDSSGS	_ASS(ph)FSGISVLTR_	0.765624	0.788902	0.657481	0.249489	0.711553		S	381	2	___1	0.994375	UID1429	0.300065	0.404685	-0.360786	-0.161282
E9Q9Q2	R3hdm1	MMQLNLPNNPQSRTHSPPQWKQNKHYCDHQR	_THS(ph)PPQWK_	0.711821	-0.436373	-0.0146795	-0.100994	-0.0578367		S	881	2	___1	1	UID1430	0.277152	-0.222279	-0.0389843	-0.00407419
E9Q9S3	Utp14b;Utp14b	KEQMIDLRNLLTANSSPVRSLAVPTIQQLED	_NLLTANSS(ph)PVR_	1.00718	NaN	7.93102	2.08824	2.08824		S	578	2	___1	0.990884	UID1431	0.40294	NaN	-3.84305	-0.986045
E9Q9T1	Lrrfip1;Lrrfip1	MTSPEGAQNKEIDCLSPEAQRLAEARLAAKR	_EIDCLS(ph)PEAQR_	-3.02141	NaN	-3.4557	0.111841	-3.02141		S	16	2	___1	1	UID1432	-1.31276	NaN	1.60843	-0.0995408
E9Q9T1	Lrrfip1;Lrrfip1;Lrrfip1	MPSLSAATLASLGGTSSRRGSGDTSISMDTE	_NMPSLSAATLASLGGTS(ph)SR_	1.76279	0.59336	1.78768	NaN	1.76279		S	83	2	___1	0.821311	UID1433	0.724738	0.304628	-0.901877	#VALUE!
E9Q9T1	Lrrfip1;Lrrfip1;Lrrfip1	PSLSAATLASLGGTSSRRGSGDTSISMDTEA	_NMPSLSAATLASLGGTSS(ph)R_	1.44135	0.331614	1.68446	0.0541567	0.886482		S	84	2	___1	0.981422	UID1434	0.587845	0.170694	-0.852459	-0.0736665
E9Q9T1	Lrrfip1;Lrrfip1;Lrrfip1	AATLASLGGTSSRRGSGDTSISMDTEASIRE	_RGS(ph)GDTSISMDTEASIR_	-1.40222	NaN	-2.21572	-0.94105	-1.40222		S	88	2	___1	0.99989	UID1435	-0.623176	NaN	1.01478	0.372729
E9Q9V7	Srcap	YLLARDDERSEVDGGSGPPTPGPTTTLGPKK	_SEVDGGS(ph)GPPTPGPTTTLGPK_	-0.312241	0.753971	NaN	1.34243	0.753971		S	559	2	___1	0.999653	UID1439	-0.158977	0.386811	#VALUE!	-0.651518
E9QA15	Cald1;Cald1;Cald1;Cald1;Cald1	LKQTENAFSRSGGRASGDKEAEGAPQVEAGK;QTENAFSPSRSGGRASGDKEAEGAPQVEAGK	_AS(ph)GDKEAEGAPQVEAGK_	0.547436	2.51875	0.579746	0.830177	0.704962		S	257	2	___1	1	UID1440	0.207143	1.28983	-0.32357	-0.421747
E9QA15	Cald1;Cald1;Cald1;Cald1;Cald1	NIKSMWEKGSVFSAPSASGTPNKETAGLKVG	_GSVFSAPS(ph)ASGTPNKETAGLK_	-0.896235	NaN	0.01838	1.22409	0.01838		S	463	3	___1	0.916595	UID1441	-0.407689	NaN	-0.0548118	-0.598435
E9QA15	Cald1;Cald1;Cald1;Cald1;Cald1	KSMWEKGSVFSAPSASGTPNKETAGLKVGVS	_GSVFSAPSAS(ph)GTPNK_	-0.738374	-2.26117	-0.558905	NaN	-0.738374		S	465	2	___1	0.927507	UID1442	-0.340459	-1.15602	0.221568	#VALUE!
E9QA15	Cald1;Cald1;Cald1;Cald1;Cald1	LKVGVSSRINEWLTKSPDGNKSPAPKPSDLR	_INEWLTKS(ph)PDGNK_	0.952947	3.54724	0.6788	1.17211	1.06253		S	490	2	___1	1	UID1443	0.379843	1.81611	-0.370993	-0.575121
E9QA15	Cald1;Cald1;Cald1;Cald1;Cald1	RPGDVSGKRNLWEKQSVDKVTSPTKV_____	_NLWEKQS(ph)VDK_	-0.0499306	2.23409	-1.49353	0.291158	0.120614		S	520	2	___1	1	UID1446	-0.0472639	1.14418	0.669027	-0.179972
E9QA15	Cald1;Cald1;Cald1;Cald1;Cald1	GKRNLWEKQSVDKVTSPTKV___________	_VTS(ph)PTKV_	-1.5045	1.33022	-2.20497	-0.0641752	-0.784338		S	526	2	___1	0.999854	UID1447	-0.666737	0.681674	1.00963	-0.0205892
Q7TQK5	Ccdc93;Ccdc93	VSEYAGKQSELSAEESPEKLGTSQLHQRKVI	_QSELSAEES(ph)PEK_	0.530373	1.45049	0.943436	1.5625	1.19696		S	305	2	___1	1	UID1448	0.199876	0.743213	-0.49769	-0.750227
Q7TQK0	Ccnt2;Ccnt2	HKHGPAQAVTGTSVTSPIKMKLPLTNSDRPE	_HGPAQAVTGTSVTS(ph)PIK_	-1.51894	-0.543297	-1.30243	-1.11864	-1.21054		S	477	2	___1	0.998646	UID1450	-0.672888	-0.276992	0.577538	0.452385
Q0VGY8	Tanc1;Tanc1	QQQKQQGPPPAPANDSDNEEDAPASSLKDHF	_QQGPPPAPANDS(ph)DNEEDAPASSLK_	-2.54527	-2.03785	NaN	-0.859796	-2.03785		S	1436	3	___1	0.999955	UID1452	-1.10998	-1.04174	#VALUE!	0.336284
Q3UIA2	Arhgap17;Arhgap17	QQQQQQQQTPGMRRCSSSLPPIQAPSHPPPQ	_RCS(ph)SSLPPIQAPSHPPPQPPTQPR_	NaN	-3.12677	-3.55447	-1.13622	-3.12677		S	698	3	___1	0.975268	UID1455	NaN	-1.59894	1.65572	0.460271
E9QAQ5	Gsk3b;Gsk3b	_______MSGRPRTTSFAESCKPVQQPSAFG	_TTS(ph)FAESCKPVQQPSAFGSM(ox)K_	NaN	-0.764775	0.334894	-2.21105	-0.764775		S	9	3	___1	0.855684	UID1458	NaN	-0.390321	-0.206345	0.942383
E9QAS5	Chd4;Chd4;Chd4;Chd4	WSMPELAEVEENKKMSQPGSPSPKTPTPSTP	_KMS(ph)QPGS(ph)PSPK_	-2.22386	-2.81194	-0.917392	-2.79225	-2.50806	Down	S	1531	2	___1	1	UID1459	-0.973101	-1.43784	0.393197	1.20308
E9QAS5	Chd4;Chd4;Chd4;Chd4	ELAEVEENKKMSQPGSPSPKTPTPSTPGDTQ	_MSQPGS(ph)PSPK_	-0.510602	-0.547092	-0.311796	-0.345978	-0.42829		S	1535	2	___1	0.999988	UID1460	-0.243455	-0.278934	0.103263	0.105812
E9QAS5	Chd4;Chd4;Chd4;Chd4	AEVEENKKMSQPGSPSPKTPTPSTPGDTQPN	_M(ox)SQPGSPS(ph)PK_	-1.38894	NaN	-1.21287	-0.249189	-1.21287		S	1537	2	___1	0.979458	UID1461	-0.617521	NaN	0.534659	0.062398
E9QAS5	Chd4;Chd4;Chd4	GKVQKILIWKWGQPPSPTPVPRPPDADPNTP	_WGQPPS(ph)PTPVPRPPDADPNTPSPK_	-1.83384	-1.67099	-0.932041	-1.63883	-1.65491		S	515	3	___1	0.991485	UID1463	-0.806998	-0.854023	0.40021	0.685716
E9QAU9	Lrch3;Lrch3;Lrch3;Lrch3;Lrch3;Lrch3;Lrch3;Lrch3	LFRAAVRAEANKGRASPLLLSSAPATDPTDA	_AS(ph)PLLLSSAPATDPTDAITR_	5.74091	4.3985	6.88948	4.75672	5.24882	Up	S	625	2	___1	0.999995	UID1465	2.41895	2.25169	-3.34441	-2.18298
E9QAU9	Lrch3;Lrch3;Lrch3;Lrch3;Lrch3;Lrch3	SLSSQFMAYIEQRRISHEVSPVKPIAVREFQ	_RIS(ph)HEVSPVKPIAVR_	-7.06325	-4.17734	-7.4235	-2.44829	-5.6203	Down	S	415	4	___1	0.999998	UID1466	-3.0341	-2.13651	3.50805	1.04879
E9QAU9	Lrch3;Lrch3;Lrch3;Lrch3;Lrch3;Lrch3	QFMAYIEQRRISHEVSPVKPIAVREFQKTED	_ISHEVS(ph)PVKPIAVR_	1.4167	0.011528	1.94391	-1.39701	0.714114		S	419	3	___1	0.998685	UID1467	0.577344	0.00690831	-0.976674	0.577248
E9QAU9	Lrch3;Lrch3;Lrch3;Lrch3;Lrch3	LDSGFNSVDSGDKRWSGNEPTDEFSDLPLRV	_WS(ph)GNEPTDEFSDLPLR_	0.103131	-1.16471	-0.202101	-1.23679	-0.683405		S	324	2	___1	1	UID1468	0.017922	-0.594966	0.0507454	0.505383
E9QB01	Ncam1;Ncam1	PGAKGKDMEEGKAAFSKDESKEPIVEVRTEE	_AAFS(ph)KDESKEPIVEVR_	NaN	5.79145	3.16402	2.60348	3.16402	Up	S	770	3	___1	0.98646	UID1469	NaN	2.96445	-1.56081	-1.21716
E9QB01	Ncam1;Ncam1	GKDMEEGKAAFSKDESKEPIVEVRTEEERTP	_DES(ph)KEPIVEVR_	4.10799	4.84874	3.79657	4.66061	4.3843	Up	S	774	3	___1	1	UID1470	1.72351	2.48207	-1.86365	-2.13987
E9QJT2	Naf1;Naf1	SWKNDQEPPPEVLDFSDDEKEKEAKQRKKSQ	_NDQEPPPEVLDFS(ph)DDEKEK_	NaN	-1.28433	-1.44192	-1.8486	-1.44192		S	416	3	___1	1	UID1471	NaN	-0.656172	0.644318	0.779806
E9QJU8	Trp53bp2;Tp53bp2	SVHESHENERIPRPLSPTKLLPFLSNPYRNQ	_IPRPLS(ph)PTK_	-0.447195	-0.282882	-1.48632	-0.176292	-0.365039		S	703	2	___1	0.998102	UID1475	-0.216451	-0.143739	0.665575	0.0297002
E9QJU8	Trp53bp2;Tp53bp2	QCAAPPSFGTLRKNQSSEDILRDAQAVNKNV	_NQS(ph)SEDILR_	-0.0558864	0.333868	-1.15702	0.280354	0.112234		S	485	2	___1	0.999979	UID1476	-0.0498004	0.171847	0.507922	-0.175126
E9QJU8	Trp53bp2;Tp53bp2	SGGQDQVLSPASKQESPPAAAVRPFTPQPSK	_QES(ph)PPAAAVR_	-1.43683	-0.588374	-2.00383	NaN	-1.43683		S	581	2	___1	1	UID1478	-0.637917	-0.300058	0.913339	#VALUE!
E9QJY0	Slc7a2;Slc7a2	EKSAMQANDHHQRNLSLPFILHEKTSEC___	_NLS(ph)LPFILHEK_	1.76033	0.24307	5.0906	-0.752293	1.0017		S	662	3	___1	1	UID1481	0.72369	0.125387	-2.48318	0.288063
P97798	Neo1;Neo1	PDPNPVMTDTPIPRNSQDITPVDNSMDSNIH	_NS(ph)QDITPVDNSMDSNIHQR_	1.44135	2.3142	NaN	3.01672	2.3142		S	1225	3	___1	0.99999	UID1482	0.587845	1.18517	#VALUE!	-1.40251
E9QK36	Wdr62;Wdr62;Wdr62	KLSSVMAGVPARRNQSSPPPAPPLCLRRRTR	_NQS(ph)SPPPAPPLCLR_	-0.511524	NaN	-0.733859	-1.57011	-0.733859		S	33	2	___1	0.990193	UID1483	-0.243848	NaN	0.305329	0.654894
E9QK36	Wdr62;Wdr62;Wdr62	LSSVMAGVPARRNQSSPPPAPPLCLRRRTRL	_NQSS(ph)PPPAPPLCLR_	-0.381979	-0.456707	-0.0301812	-0.971705	-0.419343		S	34	2	___1	0.999879	UID1484	-0.188677	-0.232684	-0.0315627	0.38648
E9QK89	Mdc1;Mdc1	IRIESQNSRVLLAADSEEEGDFPSGRCVANG	_VLLAADS(ph)EEEGDFPS(ph)GR_	-0.390058	0.777164	0.135762	0.145026	0.140394		S	168	2	___1	1	UID1487	-0.192118	0.398679	-0.111009	-0.114426
Q99NH0	Ankrd17;Ankrd17	NESPAQSVSSGVRAPSPAPSSVPLGSEKPSS	_APS(ph)PAPSSVPLGSEK_	0.296888	0.238154	0.746666	0.218099	0.267521		S	2401	2	___1	1	UID1492	0.10044	0.122871	-0.403485	-0.147202
Q99NH0	Ankrd17;Ankrd17;Ankrd17	_MEKATVPAAAEGEGSPPAAAAVAAPPAAAA	_ATVPAAAEGEGS(ph)PPAAAAVAAPPAAAAAEVGGGAR_	-1.83023	-1.93235	NaN	-1.49802	-1.83023		S	15	3	___1	0.992216	UID1493	-0.805459	-0.98776	#VALUE!	0.622556
Q99NH0	Ankrd17;Ankrd17	SSCSDESSNSNSSRKSNNHASAVVTTTMASK	_KS(ph)NNHASAVVTTTMASK_	-0.217474	NaN	0.0179733	-2.82602	-0.217474		S	1631	3	___1	0.99974	UID1494	-0.118617	NaN	-0.0546171	1.21822
Q99NH0	Ankrd17;Ankrd17	SSPSPPAQPGGVSRNSPLDCGSASPNKGASA	_NS(ph)PLDCGSASPNK_	0.695568	-0.162455	-0.155485	0.871545	0.270041		S	2055	2	___1	1	UID1496	0.27023	-0.0821176	0.0284277	-0.440303
Q99NH0	Ankrd17;Ankrd17	AQPGGVSRNSPLDCGSASPNKGASASEQEAS	_NSPLDCGS(ph)ASPNK_	0.0393666	0.818352	0.315314	0.0574078	0.186361		S	2061	2	___1	0.998408	UID1497	-0.00923391	0.419755	-0.196971	-0.0751248
Q99NH0	Ankrd17;Ankrd17	PGGVSRNSPLDCGSASPNKGASASEQEASSP	_NSPLDCGSAS(ph)PNK_	-0.126252	0.729933	0.33326	-0.14431	0.103504		S	2063	2	___1	0.999865	UID1498	-0.0797676	0.374511	-0.205563	0.0153549
E9QKI5	Akt1s1;Akt1s1;Akt1s1;Akt1s1;Akt1s1;Akt1s1	TATRPPGPPPAPQPPSPAPSPPPRPALARED	_AATATRPPGPPPAPQPPS(ph)PAPS(ph)PPPRPALAR_	NaN	-0.837242	0.515904	0.0331715	0.0331715		S	88	4	___1	1	UID1499	NaN	-0.427401	-0.293005	-0.0642537
E9QKI5	Akt1s1;Akt1s1;Akt1s1;Akt1s1	PQPPATALPTQQYAKSLPVSVPVWAFKEKRT	_S(ph)LPVSVPVWAFK_	-0.2507	-1.98096	NaN	-1.70689	-1.70689		S	184	2	___1	0.999999	UID1501	-0.132768	-1.01264	#VALUE!	0.716245
P98078	Dab2;Dab2;Dab2;Dab2;Dab2	PPKPAPRQGVLLGTKSADNSLENPFSKGFSS	_S(ph)ADNSLENPFSK_	2.06761	0.817298	0.595588	-2.8002	0.706443		S	727	2	___1	0.999999	UID1504	0.854554	0.419215	-0.331155	1.20664
P98078	Dab2;Dab2;Dab2	QNGFHIKSSPNPFVGSPPKGLSVPNGVKQDL	_SSPNPFVGS(ph)PPK_	-1.27714	NaN	-1.77367	-4.3369	-1.77367		S	401	2	___1	1	UID1505	-0.569907	NaN	0.803144	1.89592
E9QLH9	D8Ertd82e;Sgk223	QPPPLPQKKIVSRAASSPDGFFWTQGSPKPR	_AAS(ph)SPDGFFWTQGSPK_	2.44652	-1.47151	NaN	-2.29187	-1.47151		S	802	2	___1	0.99085	UID1506	1.01593	-0.751951	#VALUE!	0.978635
E9QLH9	D8Ertd82e;Sgk223	SGQNSKTNSGMSKSASFAFEFPKDRGRLEAF	_SAS(ph)FAFEFPK_	-2.64401	-2.60749	-2.9372	-0.919615	-2.62575	Down	S	671	2	___1	0.998374	UID1508	-1.15204	-1.33323	1.3602	0.363115
E9QLJ5	Plec;Plec;Plec;Plec;Plec;Plec;Plec;Plec;Plec;Plec;Plec;Plec;Plec	ELQLITYKAQLEPVASPAKKPKVQSGSESVI	_AQLEPVAS(ph)PAK_	1.36891	1.57938	1.22664	1.29066	1.32978		S	1443	2	___1	1	UID1509	0.556993	0.809167	-0.633278	-0.628296
E9QLJ5	Plec;Plec;Plec;Plec;Plec;Plec;Plec;Plec;Plec;Plec;Plec;Plec	YYSPYSVSGSGSTAGSRTGSRTGSRAGSRRG	_GYYSPYSVSGSGS(ph)TAGS(ph)R_	2.6342	3.09824	-0.971964	3.42892	2.86622	Up	S	4633	2	___1	0.999604	UID1515	1.09586	1.58636	0.419323	-1.5874
E9QLK3	Baat1;Brat1	QPSLHCPYTVGLPRASSPRPHPEFLQTLCRL	_AS(ph)SPRPHPEFLQTLCR_	-0.847249	-0.791285	-0.63596	-1.04541	-0.819267		S	729	3	___1	0.843058	UID1519	-0.386827	-0.403885	0.258459	0.419539
E9QLK3	Baat1;Brat1	PSLHCPYTVGLPRASSPRPHPEFLQTLCRLP	_ASS(ph)PRPHPEFLQTLCR_	-1.01616	-0.207189	-0.950481	-1.14439	-0.983321		S	730	3	___1	0.877492	UID1520	-0.458763	-0.105008	0.409038	0.463936
E9QM38	Slc12a2;Slc12a2	PAAGDGLGRPLGPTPSQSRFQVDPVSENAGR	_PLGPTPS(ph)QSR_	0.322072	-0.344508	NaN	1.38818	0.322072		S	75	2	___1	0.978609	UID1523	0.111165	-0.175273	#VALUE!	-0.672037
E9QM61	Ercc5;Ercc5	SKERNSGATADAGSISPRTCAAIQKALDDDN	_NSGATADAGSIS(ph)PR_	-0.294812	NaN	-0.00621594	-0.553446	-0.294812		S	384	2	___1	0.999999	UID1525	-0.151554	NaN	-0.0430363	0.198871
E9QM77	Atxn2;Atxn2;Atxn2;Atxn2	NSPAGSKENVKASETSPSFSKADNKGMSPVV	_ASETS(ph)PSFSK_	-1.24286	-0.667117	-0.855028	-0.409606	-0.761073		S	741	2	___1	0.971664	UID1526	-0.555312	-0.340349	0.363339	0.134352
E9QM77	Atxn2;Atxn2;Atxn2	DSSLSSYTVPLERDNSEEFLKREARANQLAE	_DNS(ph)EEFLKR_	-1.27965	-1.77999	-2.10793	-0.922864	-1.52982		S	400	2	___1	1	UID1528	-0.570979	-0.909797	0.963178	0.364572
E9QM77	Atxn2;Atxn2;Atxn2;Atxn2	SETSPSFSKADNKGMSPVVSEHRKQIDDLKK	_GMS(ph)PVVSEHR_	0.44314	0.882945	-0.0478703	0.359916	0.401528		S	753	2	___1	1	UID1529	0.162726	0.452806	-0.0230939	-0.210813
E9QM77	Atxn2;Atxn2;Atxn2	PSRPPSRPSRPPSHPSAHGSPAPVSTMPKRM	_PSRPPSHPS(ph)AHGSPAPVSTMPK_	NaN	-0.805421	-0.506768	1.57491	-0.506768		S	569	4	___1	0.849304	UID1531	NaN	-0.411119	0.196607	-0.755795
E9QMB7	Naa30;Naa30	QEEEEMDEQVRLLSSSLTTGCSLRSSQGREA	_LLSSS(ph)LTTGCSLR_	NaN	-0.631292	1.87902	-2.05291	-0.631292		S	192	2	___1	0.795166	UID1535	NaN	-0.322018	-0.94561	0.871449
E9QMD3	Zfhx3	QQPKASQTPVPQGPASPDKDPAKESPKPEEQ	_ASQTPVPQGPAS(ph)PDKDPAK_	-0.915162	0.628072	-0.645015	0.82557	-0.0084715		S	3431	2	___1	1	UID1537	-0.415749	0.32239	0.262794	-0.419681
E9QMD3	Zfhx3;Zfhx3	VLKTPITSVPLGPLASSPTKSSEGKDSGAAE	_TPITSVPLGPLAS(ph)SPTK_	-1.38022	NaN	-0.628393	0.00361372	-0.628393		S	425	2	___1	0.75006	UID1538	-0.613807	NaN	0.254836	-0.0509956
Q99PP7	Trim33;Trim33;Trim33	DSDEDFIQPRRKRLKSDERPVHIK_______	_LKS(ph)DERPVHIK_	0.217929	-0.136371	-0.195694	1.02127	0.040779		S	1134	4	___1	1	UID1540	0.0668125	-0.0687708	0.0476779	-0.50746
Q99PP7	Trim33;Trim33;Trim33	ESCKQSGLSNLVNGKSPIRNLMHRSARIGGD	_QSGLSNLVNGKS(ph)PIR_	-1.97205	-0.543639	-0.878363	-0.0107492	-0.711001		S	877	3	___1	0.999948	UID1541	-0.865858	-0.277167	0.374511	-0.0445532
E9QMF5	Nav3;Nav3;Nav3	TQGLRQPGSKYPDIASPTFRRLFGAKAGGKS	_YPDIAS(ph)PTFR_	2.49161	2.15334	3.19198	1.29026	2.32247	Up	S	1248	2	___1	0.999833	UID1542	1.03513	1.10286	-1.5742	-0.628118
H3BJL0	Apobec3;Apobec3;Apobec3;Apobec3;Apobec3;Apobec3;Apobec3	KDTFLCYEVTRKDCDSPVSLHHGVFKNKDNI	_DCDS(ph)PVSLHHGVFK_	1.50344	-3.05068	-3.20157	-3.88222	-3.12613	Down	S	66	3	___1	0.999494	UID1543	0.614286	-1.56	1.48677	1.69198
E9QN63	Asap1;Asap1;Asap1;Asap1;Asap1;Asap1;Asap1;Asap1	LSPNVQSRDAIQKQASEDSNDLTPTLPETPV	_QAS(ph)EDSNDLTPTLPETPVPLPR_	NaN	4.40193	2.89681	2.73949	2.89681	Up	S	1059	2	___1	0.999793	UID1544	NaN	2.25344	-1.43288	-1.27816
E9QN63	Asap1;Asap1;Asap1;Asap1;Asap1	KKRPPPPPPGHKRTLSDPPSPLPHGPPNKGA	_TLS(ph)DPPSPLPHGPPNK_	3.02731	2.21964	3.71542	1.09522	2.62348	Up	S	854	2	___1	0.99992	UID1546	1.26327	1.13678	-1.8248	-0.540631
Q61464	Znf638;Zfml;Zfml	EVTKQKHTETVDKGLSPAQKPKLASGTKPSA	_GLS(ph)PAQKPK_	0.0585408	-1.52742	0.0738521	-1.58499	-0.73444		S	606	2	___1	1	UID1548	-0.00106798	-0.780562	-0.0813695	0.661567
Q61464	Znf638;Zfml;Zfml	VQRKNDLELGKGSTFSPDLKNSPVDESEVQT	_GSTFS(ph)PDLK_	0.484348	-0.324554	0.0309893	-1.07747	-0.146782		S	1099	2	___1	0.999992	UID1549	0.180275	-0.165062	-0.0608486	0.433921
E9QMQ3	Triobp	GLGAPRSPARVSRAASPGAAMTPDLLNFKKG	_AAS(ph)PGAAMTPDLLNFK_	1.97165	1.07388	1.92293	2.16111	1.94729		S	43	2	___1	0.999998	UID1555	0.813689	0.550507	-0.96663	-1.01873
E9QMQ3	Triobp;Triobp;Triobp	PRPSLDYVELSPLAPSSPQRMRTLSRSTPER	_PSLDYVELSPLAPS(ph)SPQR_	2.69966	1.79268	3.4553	2.00764	2.35365	Up	S	1603	2	___1	0.935326	UID1556	1.12373	0.91831	-1.70026	-0.949895
E9QMQ3	Triobp;Triobp;Triobp	RPSLDYVELSPLAPSSPQRMRTLSRSTPERP	_PSLDYVELSPLAPSS(ph)PQR_	3.13277	2.06589	3.03584	2.11016	2.573	Up	S	1604	2	___1	0.970781	UID1557	1.30819	1.05811	-1.49944	-0.99588
E9QMX4	Rps6kc1;Rps6kc1	ADPGVLFEAAVDHRSSPDQFLFSSLRSESDR	_SS(ph)PDQFLFSSLR_	-1.20963	-0.409856	-1.53942	-0.942291	-1.07596		S	779	2	___1	0.978797	UID1561	-0.541156	-0.208711	0.690998	0.373286
E9QMZ5	Plec	LRVPEPEGLGSKRTSSEDNLYLAVLRASEGK	_TSS(ph)EDNLYLAVLR_	2.55434	-0.720594	2.57562	3.48243	2.56498	Up	S	21	2	___1	0.97562	UID1562	1.06185	-0.367713	-1.27911	-1.6114
E9QN31	Nop2;Nop2	LSSRARKRAAKRRAGSVDVPKPNKSPGIKTL	_RAGS(ph)VDVPKPNK_	-4.5848	-1.46895	-3.16697	-1.58214	-2.37455		S	59	3	___1	1	UID1563	-1.97858	-0.75064	1.4702	0.66029
E9QN52	Lrrfip2	TRPSSRNSASATTPLSGNSSRRGSGDTSSLI	_NSASATTPLS(ph)GNSSR_	-5.49821	-6.14294	NaN	4.71709	-5.49821		S	103	2	___1	0.965792	UID1564	-2.36758	-3.14229	#VALUE!	-2.16521
E9QN52	Lrrfip2	SRNSASATTPLSGNSSRRGSGDTSSLIDPDT	_NSASATTPLSGNSS(ph)R_	-2.14896	-2.29817	NaN	4.58981	-2.14896		S	107	2	___1	0.977074	UID1565	-0.941199	-1.17495	#VALUE!	-2.10811
E9QN87	Plec;Plec;Plec	RVRRPVAMVIPARRRSPHVQTMQGPLGCPPK	_S(ph)PHVQTM(ox)QGPLGCPPK_	2.51845	1.84749	3.53668	1.30322	2.18297		S	114	2	___1	1	UID1568	1.04656	0.946357	-1.73923	-0.633927
E9QN92	Steap3;Steap3;Steap3	SGEMDKPLISRRLVDSDGSLAEVPKEAPKVG	_RLVDS(ph)DGS(ph)LAEVPK_	2.68532	3.79255	2.69123	3.47477	3.083	Up	S	55	2	___1	1	UID1569	1.11763	1.94163	-1.33446	-1.60797
E9QN92	Steap3;Steap3;Steap3	MDKPLISRRLVDSDGSLAEVPKEAPKVGILG	_RLVDS(ph)DGS(ph)LAEVPK_	5.37708	3.36065	5.33586	2.20104	4.34825	Up	S	58	2	___1	1	UID1570	2.264	1.72063	-2.6006	-1.03664
Q9Z0R6	Itsn2;Itsn2	QQKSAFTRTVSPGSVSPIHGQGQAVENLKAQ	_TVSPGSVS(ph)PIHGQGQAVENLK_	-0.583157	-0.713255	-0.957507	-0.938067	-0.825661		S	843	2	___1	0.99887	UID1571	-0.274355	-0.363958	0.412402	0.371392
E9QNN1	Dhx9	AEAENNSGVESSGYGSPGPTWDRGANLKDYY	_AEAENNSGVESSGYGS(ph)PGPTWDR_	-0.0716675	0.342864	0.219646	0.0840142	0.15183		S	137	2	___1	0.999999	UID1572	-0.0565212	0.17645	-0.15117	-0.0870589
Q8CHG7	Rapgef2;Rapgef2	RKKVPVKDLPPFGINSPQALKKILSLSEEGS	_DLPPFGINS(ph)PQALKK_	5.5148	4.7086	6.57759	6.07102	5.79291	Up	S	1079	2	___1	1	UID1573	2.32265	2.41037	-3.19509	-2.77251
Q8CHG7	Rapgef2;Rapgef2	DVAQTGGHKKRVRRSSFLNAKKLYEDAQMAR	_RSS(ph)FLNAK_	-0.51349	2.56983	1.37023	3.09635	1.97003		S	960	2	___1	0.999967	UID1575	-0.244685	1.31597	-0.702022	-1.43823
E9QNT5	Taf12;Taf12	TVGKIAGTPGTGGRLSPENNQVLTKKKLQDL	_LS(ph)PENNQVLTK_	0.953728	-0.722632	0.783641	-0.453553	0.165044		S	103	2	___1	1	UID1577	0.380175	-0.368756	-0.421187	0.154065
E9QNY8	Sacs;Sacs	DESSQNRDSAPTTPTSPTEFLTPGLRSIPPL	_DSAPTTPTS(ph)PTEFLTPGLR_	-1.16813	-0.740197	-1.70732	-0.26118	-0.954163		S	4266	2	___1	0.900647	UID1578	-0.523484	-0.377744	0.771379	0.0677763
E9QNY8	Sacs;Sacs	VEEFHHVFRRIADLQSPLFRGPDDDPATLFE	_IADLQS(ph)PLFR_	-2.08657	-0.150601	-2.66247	0.858652	-1.11859		S	1781	2	___1	1	UID1579	-0.91463	-0.0760522	1.22866	-0.43452
E9QP00	Tra2a;Tra2a	______________MSDVEENNFEGRESRSQ	_(ac)S(ph)DVEENNFEGRES(ph)R_	0.0752464	0.193263	-0.274537	0.0415559	0.0584011		S	2	2	___1	1	UID1584	0.0060466	0.0999011	0.0854246	-0.0680144
Q6ZWQ0	Syne2;Syne2	VAERDASERKLSRTNSMSFLPVVKEEAEESS	_TNS(ph)MSFLPVVK_	-0.765677	-2.71228	-1.26954	-1.66908	-1.46931		S	4096	2	___1	1	UID1586	-0.352087	-1.38685	0.56179	0.699285
E9QP49	Ehbp1l1;Ehbp1l1	ITGGQVGPETPEPPPSPPETRSTGQPGQTMV	_GQGSEPAAITGGQVGPETPEPPPS(ph)PPETR_	-0.560575	-0.153932	0.116978	0.336808	-0.018477		S	284	3	___1	0.99635	UID1589	-0.264738	-0.0777565	-0.102016	-0.200448
E9QP49	Ehbp1l1;Ehbp1l1	DEGHIRPQQAAARPSSAEDTSPAPVSAPAPP	_PSS(ph)AEDTSPAPVSAPAPPVR_	0.118486	0.59587	-0.275957	0.620771	0.357178		S	240	2	___1	0.786184	UID1590	0.0244615	0.305912	0.0861043	-0.327819
E9QP49	Ehbp1l1;Ehbp1l1;Ehbp1l1	GVGASGGVSGVRLRRSSVNGEAGPVPPPRAH	_RS(ph)SVNGEAGPVPPPR_	-0.973504	NaN	-0.996649	-0.216683	-0.973504		S	1445	2	___1	0.81377	UID1591	-0.440596	NaN	0.431141	0.0478175
E9QP49	Ehbp1l1;Ehbp1l1;Ehbp1l1	VGASGGVSGVRLRRSSVNGEAGPVPPPRAHG	_RSS(ph)VNGEAGPVPPPR_	-0.492244	-0.210952	-0.593338	-0.529256	-0.51075		S	1446	2	___1	0.999959	UID1592	-0.235637	-0.106933	0.238053	0.188021
E9QP99	Golga3;Golga3;Golga3	QDASVEVNRGFKEEGSPDRSSQVAICQNGQI	_GFKEEGS(ph)PDR_	0.692477	0.0725938	0.650871	0.26185	0.456361		S	60	2	___1	1	UID1593	0.268913	0.0381553	-0.357622	-0.166827
E9QPA1	C030046E11Rik;Kiaa1432;C030046E11Rik;C030046E11Rik	WLSNIGPTHRDTDRASSPGPQMQDAFLSPLS	_AS(ph)SPGPQMQDAFLSPLSNK_	0.221162	-1.12429	-0.269421	-0.773821	-0.521621		S	1187	3	___1	0.878766	UID1594	0.0681893	-0.574283	0.0829751	0.29772
E9QPA1	C030046E11Rik;Kiaa1432;C030046E11Rik;C030046E11Rik	LSNIGPTHRDTDRASSPGPQMQDAFLSPLSN	_ASS(ph)PGPQMQDAFLSPLSNK_	-0.630604	-1.25397	-0.149866	-0.430344	-0.530474		S	1188	2	___1	0.88821	UID1595	-0.294562	-0.640636	0.0257375	0.143655
E9QPD4	Osbp;Osbp	NDLIAKHGTALQRSLSELESLKLPAESNEKI	_SLS(ph)ELESLK_	0.576945	0.400159	0.371764	0.32795	0.385961		S	238	2	___1	0.999996	UID1602	0.219711	0.205768	-0.223997	-0.196475
E9QPX0	Apbb2;Apbb2;Apbb2;Apbb2	RPVSIPADLHGSRKGSLSSVTPSPTPENEKQ	_KGS(ph)LSSVTPSPTPENEK_	0.984819	-1.59606	1.66439	0.42026	0.70254		S	334	2	___1	0.999995	UID1604	0.393416	-0.815682	-0.842853	-0.237881
E9QPX0	Apbb2;Apbb2;Apbb2;Apbb2;Apbb2	RKAAEQGQQDPNKNLSPAAVINLTSEKLEVK	_NLS(ph)PAAVINLTSEK_	-1.21614	1.06829	-1.67894	2.88845	-0.073925		S	123	2	___1	1	UID1605	-0.54393	0.547647	0.757791	-1.34498
E9QPX0	Apbb2;Apbb2;Apbb2;Apbb2;Apbb2;Apbb2	TQWERPVSIPADLHGSRKGSLSSVTPSPTPE	_PVSIPADLHGS(ph)R_	0.830213	-0.220319	1.56127	2.15356	1.19574		S	330	2	___1	1	UID1606	0.327572	-0.111726	-0.793482	-1.01535
E9QQ68	Tbc1d12;Tbc1d12	ARFGSRNTFEVSRRQSAGDLLPSAGPSAPLP	_RQS(ph)AGDLLPSAGPSAPLPAAEQGPGGTTAR_	-1.70927	-1.26083	-1.04696	-0.483762	-1.15389		S	207	3	___1	0.999989	UID1607	-0.753945	-0.644149	0.455229	0.167615
E9QQ68	Tbc1d12;Tbc1d12	AAEQGPGGTTARARRSGGFADFFARNLFPKR	_S(ph)GGFADFFAR_	-2.30578	0.232193	-2.42317	-1.16901	-1.7374		S	238	2	___1	1	UID1609	-1.00799	0.119821	1.1141	0.474981
Q9Z2A0	Pdpk1;Pdpk1;Pdpk1;Pdpk1;Pdpk1	TAKVLSPESKQARANSFVGTAQYVSPELLTE	_ANS(ph)FVGTAQYVSPELLTEK_	0.720755	0.0596584	NaN	1.46063	0.720755		S	244	2	___1	1	UID1610	0.280956	0.0315363	#VALUE!	-0.704536
Q5DU09	Znf652;Zfp652	QRRTRRAASAAAATTSPAPRTTRGRRKSAEL	_AASAAAATTS(ph)PAPR_	2.25616	NaN	2.16093	-0.143037	2.16093		S	203	2	___1	0.99896	UID1611	0.934856	NaN	-1.08058	0.0147838
F2Z4A3	Fat1	QFESIHPPRDMPAAGSLGSSSRSRQRFNLNQ	_DMPAAGS(ph)LGSSSR_	3.74039	-0.170375	NaN	-1.66075	-0.170375		S	4475	2	___1	0.999547	UID1612	1.56696	-0.0861704	#VALUE!	0.695549
H3BLH0	Smarca2;Smarca2;Smarca2;Smarca2;Smarca2;Smarca2;Smarca2;Smarca2;Smarca2;Smarca2;Smarca2;Smarca2	EKAKKRRGRPPAEKLSPNPPKLTKQMNAIID	_GRPPAEKLS(ph)PNPPK_	1.98511	1.44239	2.10461	2.05257	2.01884		S	1388	2	___1	1	UID1614	0.819423	0.73907	-1.05361	-0.970045
F8WID3	Myc;Myc;Myc;Mycn	EDIWKKFELLPTPPLSPSRRSGLCSPSYVAV	_KFELLPTPPLS(ph)PSR_	-0.881572	-2.79366	0.0104711	-3.49172	-1.83762		S	77	3	___1	0.997023	UID1615	-0.401444	-1.42849	-0.0510253	1.51682
F8WID3	Myc;Myc;Myc;Mycn	IWKKFELLPTPPLSPSRRSGLCSPSYVAVAT	_KFELLPTPPLSPS(ph)R_	-0.667618	-3.14648	-0.381398	-3.56484	-1.90705		S	79	2	___1	0.974839	UID1616	-0.310325	-1.60902	0.136585	1.54962
P47915	Rpl29;Gm17669;Gm10709;Gm5218	VQTKAGAKAPAKAQASAPAQAPKGAQAPKGA	_AQAS(ph)APAQAPK_	-0.716314	1.3425	-0.340552	-0.597143	-0.468847		S	138	2	___1	1	UID1619	-0.331064	0.687956	0.11703	0.218471
Q60949	Tbc1d1;Tbc1d1;Tbc1d1	HFPVECPAPPEPAQSSPGVSQRKLMRYHSVS	_ANTLSHFPVECPAPPEPAQSS(ph)PGVSQR_	1.09244	1.10128	NaN	2.19241	1.10128		S	608	3	___1	0.945286	UID1620	0.439251	0.564524	#VALUE!	-1.03277
Q60949	Tbc1d1;Tbc1d1;Tbc1d1	GQPSAPGPRPMRKSFSQPGLRSLAFRKEFQD	_SFS(ph)QPGLR_	-0.528414	-0.788228	-1.9681	0.574957	-0.658321		S	231	2	___1	0.999999	UID1621	-0.251041	-0.402321	0.896233	-0.307269
Q60949	Tbc1d1;Tbc1d1	VSYRNALRKKLHSSSSVPNFLKFLAPVDENN	_LHSSSS(ph)VPNFLK_	-0.865547	0.381764	-1.91996	2.01685	-0.241892		S	700	2	___1	0.997584	UID1622	-0.394619	0.196355	0.873183	-0.954026
Q60949	Tbc1d1;Tbc1d1	GQPSAPPPPRLNPSASSPNFFKYLKHNSSGE	_LNPSAS(ph)SPNFFK_	0.26227	1.05224	-1.04168	2.56919	0.657255		S	660	2	___1	0.99744	UID1623	0.0856966	0.539432	0.452701	-1.20178
Q60949	Tbc1d1;Tbc1d1;Tbc1d1	QSSPGVSQRKLMRYHSVSTETPHERNVDHLP	_YHS(ph)VSTETPHER_	-1.05408	NaN	-2.21677	-1.25599	-1.25599		S	621	3	___1	0.928497	UID1625	-0.474913	NaN	1.01528	0.513996
Q6PCQ0	Iqce;Iqce	SSQRETVSLTPSGSASPPSLRASPGVIRKEL	_ETVSLTPSGSAS(ph)PPSLR_	-0.838579	-1.58229	-1.32657	0.0467186	-1.08257		S	661	2	___1	0.995254	UID1627	-0.383134	-0.80864	0.589092	-0.0703301
Q6PCQ0	Iqce;Iqce	SPSNISVQKQPKGDQSPEDLPKVAPCEEQEH	_GDQS(ph)PEDLPK_	-1.68632	-2.02783	NaN	-0.829593	-1.68632		S	387	2	___1	1	UID1628	-0.744173	-1.03661	#VALUE!	0.322736
Q9JIX8	Acin1;Acin1	EKAPTFSASVRGRHLSHPEPEQQHVIQRLQP	_HLS(ph)HPEPEQQHVIQR_	0.905231	-2.82526	0.250692	-2.03015	-0.889729		S	710	4	___1	1	UID1631	0.359521	-1.44466	-0.166033	0.861241
Q9JIX8	Acin1;Acin1	EPLASPHPAQLLRSLSPLSGTTDTKAESPAG	_SLS(ph)PLSGTTDTK_	0.377752	-0.439005	-0.0290722	0.0199825	-0.00454485		S	479	2	___1	0.999994	UID1633	0.134878	-0.223626	-0.0320937	-0.0583378
Q9JIX8	Acin1;Acin1;Acin1	QEENEVKSSQSLEEKSQSPSPPPLPEDLEKA	_S(ph)QSPSPPPLPEDLEK_	0.695568	0.825719	0.740534	0.980468	0.783127		S	387	2	___1	0.845208	UID1634	0.27023	0.423524	-0.400549	-0.48916
Q9JIX8	Acin1;Acin1;Acin1	ENEVKSSQSLEEKSQSPSPPPLPEDLEKAPV	_SQS(ph)PSPPPLPEDLEK_	0.774965	0.525201	0.609876	1.5716	0.69242		S	389	2	___1	0.999961	UID1635	0.304044	0.269751	-0.337995	-0.75431
F6S0D5	0610010K14Rik;0610010K14Rik;Bap18;0610010K14Rik;0610010K14Rik;0610010K14Rik;0610010K14Rik	KRKVYEDSGIPLPAESPKKGPKKMTSGVLSP	_VYEDSGIPLPAES(ph)PK_	0.454621	-1.71764	0.577409	-2.0298	-0.631509		S	33	2	___1	1	UID1638	0.167615	-0.877897	-0.322451	0.861082
F6S1C4	Ppfibp1;Ppfibp1;Ppfibp1	SKGSQGTSPFPMSPPSPDSRKKSRGIMRL__;SKGSQGTSPFPMSPPSPDSRKKSRGIMRLFG	_GSQGTSPFPMSPPS(ph)PDSR_	0.169065	1.51937	0.751054	1.53953	1.13521		S	549	2	___1	0.999992	UID1639	0.0460021	0.778461	-0.405585	-0.739926
F6S1C4	Ppfibp1;Ppfibp1	VDTCEKPKLPTKPETSFEEGDGRAILGAAAE	_LPTKPETS(ph)FEEGDGR_	-0.0736409	3.76222	-0.118923	3.27594	1.60115		S	414	3	___1	0.995207	UID1640	-0.0573617	1.92611	0.0109229	-1.51878
F6S1C4	Ppfibp1;Ppfibp1;Ppfibp1	SLSDGVSTSSLQKSSSLGNLKKEASDGTDKA;SLSDGVSTSSLQKSSSLGNLKKEASDGTEKE	_SSS(ph)LGNLK_	0.719918	0.776522	0.614145	0.467101	0.667031		S	446	2	___1	0.99998	UID1641	0.2806	0.39835	-0.340039	-0.258891
F6S1C4	Ppfibp1;Ppfibp1	FGRGFFKIKSGKRTASAPNLAETEKETAEHL	_TAS(ph)APNLAETEK_	-0.270965	1.05049	-0.368487	-0.283199	-0.277082		S	511	2	___1	0.997308	UID1642	-0.141398	0.538538	0.130404	0.0776532
F6S3Z3	Cad	LPDGRFHLPPRIHRASDPGLPALYLRPGAGI	_AS(ph)DPGLPALYLR_	0.483152	-1.63529	0.611171	-3.13224	-0.576069		S	132	2	___1	1	UID1644	0.179766	-0.835754	-0.338615	1.35558
Q9JJZ4	Ube2j1;Ube2j1	SPRQRRAQQQSQRRPSTSPDVLQGQPPRAHH	_RPS(ph)TSPDVLQGQPPR_	0.885105	0.982118	1.25992	1.4543	1.12102		S	266	2	___1	0.999875	UID1646	0.35095	0.503552	-0.649209	-0.701694
F6SZ47	Braf;Braf	SVFQTPTDASRNNPKSPQKPIVRVFLPNKQR	_S(ph)PQKPIVR_	0.868063	-0.333578	1.30573	-1.69512	0.267242		S	134	2	___1	1	UID1647	0.343692	-0.16968	-0.671141	0.710966
Q8BX90	Fndc3a;Fndc3a;Fndc3a	KKLKDRQGTQKDKMSSPPPSPQKCPSPISEH	_M(ox)SS(ph)PPPSPQK_	-0.0665632	-0.708541	-1.33856	-0.687098	-0.69782		S	203	2	___1	0.998432	UID1648	-0.0543474	-0.361546	0.594835	0.25882
F6UFZ5	Pcf11;Pcf11	HDEQVSAKGVREEQRSPFNDRFPLKRPRYED;RQLFQYQEGVREEQRSPFNDRFPLKRPRYED	_S(ph)PFNDRFPLK_	-0.770827	-0.594456	-1.71384	-1.50949	-1.14016		S	628	2	___1	1	UID1649	-0.35428	-0.303169	0.774502	0.6277
F6UFZ5	Pcf11;Pcf11	IMLNIVKNELQEPCESPKVKEEQIDAPPACS	_NELQEPCES(ph)PK_	-0.163728	0.120511	-0.207624	0.101589	-0.0310695		S	1441	2	___1	1	UID1650	-0.0957278	0.0626743	0.0533895	-0.0949419
F6UT49	Gm7251	NFVKLISWYDNEYSYSNRVVDLMAYMASEE_	_LISWYDNEYSYS(ph)NR_	2.30175	1.00016	1.86721	0.446921	1.43369		S	321	2	___1	0.999988	UID1652	0.954271	0.512783	-0.939953	-0.249839
F6VW30	Ywhaq;Ywhaq;Ywhaq;Sfn;Ywhag;Ywhae;Ywhae;Ywhae;Ywhaz;Ywhaz;Ywhah;Ywhab;Ywhab	AGMDVELTVEERNLLSVAYKNVIGARRASWR;TELNEPLSNEDRNLLSVAYKNVVGARRSSWR;TELNEPLSNEERNLLSVAYKNVVGARRSSWR;TEQGAELSNEERNLLSVAYKNVVGARRSSWR;TEQGAELSNEERNLLSVAYKNVVGGRRSAWR;TEQGHELSNEERNLLSVAYKNVVGARRSSWR;VEKGEELSCEERNLLSVAYKNVVGGQRAAWR	_NLLS(ph)VAYK_	-0.787192	-1.76424	-0.713304	-1.82698	-1.27572		S	46	2	___1	1	UID1653	-0.36125	-0.901742	0.295488	0.77011
F6WIU1	Kri1;Kri1	KVILEKGGKYVDEDNSDGETVDHRLQETSTK	_YVDEDNS(ph)DGETVDHR_	0.894388	1.1491	0.187527	1.3623	1.02174		S	148	3	___1	0.999967	UID1655	0.354903	0.588996	-0.135792	-0.660429
Q8BRN9	Cc2d1b;Cc2d1b	PPIPGLEPRKGSEQDSVAATLATAQKLASED	_KGSEQDS(ph)VAATLATAQK_	-1.48161	2.10755	-2.81979	NaN	-1.48161		S	459	3	___1	0.783317	UID1658	-0.65699	1.07943	1.30399	#VALUE!
Q9D8C8	Ppp1r35;Ppp1r35	GSRRGRQVRFQLAPPSPVRSEPLLVAGAPGD	_FQLAPPS(ph)PVR_	0.376826	-0.0220057	-0.160799	0.78793	0.17741		S	85	2	___1	1	UID1660	0.134484	-0.0102506	0.0309717	-0.402798
Q9WTN3	Srebf1;Srebf1	LEAFLGGPKVTPAPLSPPPSAPAALKMYPSV	_VTPAPLS(ph)PPPSAPAALK_	-3.31299	-2.27194	-0.687908	NaN	-2.27194		S	96	2	___1	0.998539	UID1661	-1.43694	-1.16152	0.283329	#VALUE!
F6Y616	Paip1;Paip1	GFPNGAGPAERSQHQSPPPPQPKAPGFLQPP	_SQHQS(ph)PPPPQPK_	-0.170758	-0.793001	-0.234798	-0.251037	-0.242918		S	47	2	___1	0.99997	UID1662	-0.0987218	-0.404764	0.0663991	0.0632268
F6YB25	Rprd1b	YGGEFIQQLKLSMEDSKSPPPKAEEKKSLKR	_LSMEDS(ph)KSPPPK_	-1.61119	-1.07733	-0.580023	-0.86565	-0.97149		S	33	3	___1	0.963763	UID1663	-0.712173	-0.550254	0.231678	0.338909
F6YB25	Rprd1b	GEFIQQLKLSMEDSKSPPPKAEEKKSLKRTF	_LSMEDSKS(ph)PPPK_	-1.08226	-0.787669	-0.727756	-0.683602	-0.757713		S	35	2	___1	0.999996	UID1664	-0.486914	-0.402035	0.302407	0.257252
F6YRW4	Kdm2a;Kdm2a;Kdm2a	MKPAPRLTPVRPAAASPIVSGARRRRVRCRK	_LTPVRPAAAS(ph)PIVSGAR_	-0.838888	-1.86075	0.355477	-2.5517	-1.34982		S	558	2	___1	0.997428	UID1667	-0.383266	-0.951122	-0.2162	1.09518
F6YZ95	Ppfibp1;Ppfibp1	SRGIMRLFGKLRRSQSTTFNPDDMSEPEFKR	_SQS(ph)TTFNPDDMSEPEFK_	0.553593	1.37019	0.365014	0.683219	0.618406		S	571	2	___1	0.958412	UID1670	0.209765	0.702126	-0.220765	-0.35583
O88286	Wiz;Wiz;Wiz	SSSPLLKKAPLTLAGSPTPKNPEDKSPQLSL	_KAPLTLAGS(ph)PTPK_	-0.245727	1.67851	0.474361	1.12681	0.800585		S	1029	2	___1	0.999789	UID1672	-0.13065	0.85989	-0.273116	-0.554803
O88286	Wiz;Wiz;Wiz	KPGAGPTQVPRELSLSPITGSKPSAASYLGP	_ELSLS(ph)PITGSK_	-0.690208	0.322834	0.16674	0.128703	0.147722		S	1370	2	___1	0.999616	UID1673	-0.319946	0.166201	-0.125841	-0.107104
O88286	Wiz;Wiz;Wiz	SPPGFSAKGLTHPSSSPLLKKAPLTLAGSPT	_GLTHPSSS(ph)PLLK_	-0.258955	-0.830841	NaN	-2.16673	-0.830841		S	1016	2	___1	0.963157	UID1676	-0.136284	-0.424126	#VALUE!	0.922502
O88286	Wiz;Wiz;Wiz	LHISPLTKKLPPPPGSPLGHSPTASPPPTAR	_KLPPPPGS(ph)PLGHSPTASPPPTAR_	-1.3799	-0.409661	-0.576427	-0.217616	-0.493044		S	1179	3	___1	0.995679	UID1677	-0.613675	-0.208611	0.229957	0.0482362
O88286	Wiz;Wiz;Wiz	LTKKLPPPPGSPLGHSPTASPPPTARKMFSG	_LPPPPGSPLGHS(ph)PTASPPPTAR_	-1.39143	-0.589416	-0.393162	-0.319868	-0.491289		S	1184	3	___1	0.912923	UID1678	-0.618584	-0.300591	0.142217	0.0941009
O88286	Wiz;Wiz;Wiz	KVLSTGGPGSSLEARSPSDLHISPLTKKLPP	_S(ph)PSDLHISPLTK_	NaN	0.467076	-0.486188	0.843647	0.467076		S	1160	2	___1	0.998482	UID1681	NaN	0.240009	0.186754	-0.427789
F6ZFU0	Eef1d;Eef1d;Eef1d;Eef1d;Eef1d;Eef1d;Eef1d	SSPTPRATAPQTQHVSPMRQVEPPTKKGATP	_ATAPQTQHVS(ph)PMR_	0.134104	0.683003	0.834671	0.350289	0.516646		S	133	2	___1	1	UID1682	0.0311129	0.350497	-0.445617	-0.206495
F6ZFU0	Eef1d;Eef1d;Eef1d;Eef1d;Eef1d;Eef1d;Eef1d;Eef1d	TPAEDDEDKDIDLFGSDEEEEDKEAARLREE	_GATPAEDDEDKDIDLFGS(ph)DEEEEDKEAAR_	-0.670055	-0.222544	0.197077	-0.117466	-0.170005		S	162	3	___1	1	UID1683	-0.311363	-0.112865	-0.140364	0.00331438
F6ZMJ4	Tnrc6a;Tnrc6a	KCNQSLGWGDSSKPVSSPDWNKQQDIVGSWG	_PVS(ph)SPDWNK_	-0.144776	0.464449	0.526296	NaN	0.464449		S	927	2	___1	0.968443	UID1684	-0.0876567	0.238665	-0.297981	#VALUE!
F6ZMJ4	Tnrc6a;Tnrc6a	CNQSLGWGDSSKPVSSPDWNKQQDIVGSWGI	_PVSS(ph)PDWNK_	-0.530793	0.576647	0.681412	-0.858267	0.022927		S	928	2	___1	0.998952	UID1685	-0.252054	0.296076	-0.372244	0.335598
F6ZMJ4	Tnrc6a;Tnrc6a	GQTPIKQNTAWDTETSPRGERKTDNGTEAWG	_QNTAWDTETS(ph)PR_	-0.388085	-0.346164	0.837298	-0.366535	-0.356349		S	724	2	___1	0.99105	UID1686	-0.191277	-0.17612	-0.446875	0.115033
F6ZSG0	Mtdh;Mtdh;Mtdh;Mtdh;Mtdh	TVNGGGWSEKSVKLSSQLSEEKWNSVPPASA	_LSS(ph)QLSEEK_	-1.43525	-1.59249	-1.10012	NaN	-1.43525		S	294	2	___1	0.99422	UID1687	-0.637244	-0.813854	0.480679	#VALUE!
F6ZSG0	Mtdh;Mtdh;Mtdh;Mtdh;Mtdh	GGGWSEKSVKLSSQLSEEKWNSVPPASAGKR	_LSSQLS(ph)EEK_	-1.323	-1.32406	-1.7314	-1.27844	-1.32353		S	297	2	___1	0.999981	UID1688	-0.589442	-0.676503	0.782912	0.524064
Q8K2Y9	Ccm2;Ccm2	LETIGVKDGRGIITDSFGRHRRALSTTSTST	_GIITDS(ph)FGR_	2.04222	1.16219	1.68011	1.45095	1.56553		S	393	2	___1	0.999998	UID1689	0.843743	0.595695	-0.850376	-0.700193
F7BGR7	Rbm4;Rbm4b;Rbm4b;Rbm4	KNKSKASTKLHVGNISPTCTNQELRAKFEEY	_LHVGNIS(ph)PTCTNQELR_	-1.53882	-0.0289142	-0.659797	-0.523887	-0.591842		S	202	3	___1	0.955928	UID1690	-0.681354	-0.0137857	0.269871	0.185613
Q01237	Hmgcr;Hmgcr	LAAGHLVRSHMVHNRSKINLQDLQGTCTKKA	_S(ph)KINLQDLQGTCTK_	3.17734	2.72739	5.00522	4.45471	3.81603	Up	S	871	3	___1	1	UID1691	1.32717	1.3966	-2.4423	-2.04752
F7CK47	Mtap4;Map4;Mtap4;Mtap4;Mtap4	TGNDITTPPNKEPPPSPEKKAKPLATTQPAK	_AAVGVTGNDITTPPNKEPPPS(ph)PEKK_	0.241457	0.331364	0.121897	-0.283504	0.181677		S	667	3	___1	1	UID1693	0.0768327	0.170566	-0.104372	0.0777899
F7CK47	Mtap4;Map4;Mtap4;Mtap4;Mtap4	LKPGPKTTPTVSKATSPSTLVSTGPSSRSPA	_ATS(ph)PSTLVSTGPSSR_	1.75766	2.01685	0.798608	1.38219	1.56993		S	785	2	___1	0.988294	UID1694	0.722553	1.03302	-0.428352	-0.66935
F7CK47	Mtap4;Map4;Mtap4;Mtap4;Mtap4	PSSSAPRVSRLATTVSAPDLKSVRSKAKVEK;PSSSAPRVSRLATTVSAPDLKSVRSKVGSTE	_LATTVS(ph)APDLK_	1.47923	1.51328	-0.513335	1.68041	1.49626		S	901	2	___1	0.999988	UID1695	0.603976	0.775346	0.199751	-0.803116
Q6XZL8	Dot1l;Dot1l	KVPESKAAATEAPADSGAEEEKSGVATVKKP	_AAATEAPADS(ph)GAEEEK_	-0.915117	-0.809173	-0.437614	-1.03481	-0.862145		S	373	2	___1	1	UID1697	-0.41573	-0.413038	0.163499	0.414785
F7DBB3	Ahnak2	LSQPPEAPKQEAKDTSFKLPSVKLPSFNWSP	_DTS(ph)FKLPSVK_	3.18152	3.62105	1.61337	NaN	3.18152		S	767	2	___1	0.998843	UID1700	1.32895	1.85388	-0.818427	#VALUE!
F7DBB3	Ahnak2;Ahnak2	SVEEMAAESRDTTQRSPVHVQPTARLDPELP	_S(ph)PVHVQPTAR_	0.0142152	-0.138916	0.191038	-0.546994	-0.0623504		S	1458	2	___1	1	UID1701	-0.0199454	-0.0700727	-0.137473	0.195977
F7DBB3	Ahnak2;Ahnak2	APLEKDVEKGRSRKLSFSMPRLALPKIKVSK	_KLS(ph)FSMPR_	-0.729379	-0.243845	-1.33137	-0.156697	-0.486612		S	841	2	___1	0.999996	UID1702	-0.336628	-0.123764	0.591392	0.0209111
F7DBB3	Ahnak2;Ahnak2	QEKAGWFRFPKLGFSSSPTKKPRNTEDGEGQ	_LGFSS(ph)SPTK_	1.47075	1.66262	0.999262	0.548205	1.23501		S	1491	2	___1	0.913361	UID1703	0.600365	0.851759	-0.524417	-0.29527
F7DBB3	Ahnak2;Ahnak2	EKAGWFRFPKLGFSSSPTKKPRNTEDGEGQE	_LGFSSS(ph)PTK_	1.93366	1.43393	1.05019	NaN	1.43393		S	1492	2	___1	0.800613	UID1704	0.797511	0.734742	-0.548797	#VALUE!
F7DBB3	Ahnak2	EAKDTSFKLPSVKLPSFNWSPKKAAESTGDS	_LPS(ph)FNWSPK_	1.37535	2.48732	1.15286	2.49409	1.93134		S	777	2	___1	0.999995	UID1705	0.559736	1.27375	-0.597955	-1.16809
F7DBB3	Ahnak2	TSFKLPSVKLPSFNWSPKKAAESTGDSQSQE	_LPSFNWS(ph)PK_	-1.19001	0.172138	-0.99799	-0.7104	-0.854195		S	781	2	___1	1	UID1706	-0.532804	0.0890913	0.431783	0.269273
F7DBB3	Ahnak2;Ahnak2	DTRMPPASLEQSLEASPISKVRVHIQGSRGE	_MPPASLEQSLEAS(ph)PISK_	2.1119	2.73189	2.63045	2.44553	2.53799	Up	S	1261	2	___1	0.999906	UID1707	0.87342	1.3989	-1.30536	-1.14631
F7DBB3	Ahnak2;Ahnak2	LEASPISKVRVHIQGSRGESQEVALPSRMER	_VHIQGS(ph)RGESQEVALPSR_	0.925763	2.52243	2.3957	2.22256	2.30913	Up	S	1273	3	___1	0.99915	UID1708	0.368265	1.29172	-1.19297	-1.0463
F8VPJ6	Rfx7	RCRSVSPAVHRQRNLSGSTLYPVSNIPRSNV	_NLS(ph)GSTLYPVSNIPR_	1.7554	1.81511	-1.00491	-0.214504	0.770448		S	1177	2	___1	0.999996	UID1709	0.721591	0.929791	0.435095	0.0468402
F8VPJ6	Rfx7	QILPKPANTSALTIRSPTTVLFTSSPIKTAV	_S(ph)PTTVLFTSSPIK_	NaN	-0.722195	0.567327	-0.765962	-0.722195		S	446	2	___1	0.995763	UID1711	NaN	-0.368532	-0.317624	0.294194
F8VPL2	Pik3c2a;Pik3c2a	LEIANSKASVCNLQISPKSEDINKFDWLDLD	_ASVCNLQIS(ph)PK_	-0.734645	-1.52268	-0.648278	-0.525301	-0.691461		S	261	2	___1	1	UID1712	-0.338871	-0.778135	0.264356	0.186247
F8VPM7	Erc1;Erc1	YGSARSVGKVEPSSQSPGRSPRLPRSPRLGH	_VEPSSQS(ph)PGRSPR_	1.11063	1.13651	1.14539	NaN	1.13651		S	17	2	___1	0.994969	UID1714	0.446997	0.582556	-0.594378	#VALUE!
F8VPM7	Erc1;Erc1	RSVGKVEPSSQSPGRSPRLPRSPRLGHRRTN	_VEPSSQSPGRS(ph)PR_	1.28735	0.82088	2.21469	-0.171562	1.05411		S	21	2	___1	0.999985	UID1715	0.522257	0.421048	-1.10631	0.0275787
F8VPQ2	Arid4a	YEKEKKLKRKILGQQSPEKKLRLDNGMEMTT	_ILGQQS(ph)PEKK_	-0.558826	-0.459889	-1.0485	0.0217915	-0.509358		S	867	2	___1	1	UID1717	-0.263993	-0.234312	0.455965	-0.0591492
F8VPT7	Sik2;Sik2;Sik2;Sik2	AHNRSPVSFREGRRASDTSLTQGIVAFRQHL	_RAS(ph)DTSLTQGIVAFR_	0.530668	0.899377	-0.685679	1.27806	0.715023		S	587	2	___1	1	UID1719	0.200002	0.461214	0.282262	-0.622643
F8VPT7	Sik2;Sik2;Sik2;Sik2	SFPVEQRLDGRQRRPSTIAEQTVAKAQTVGL	_RPS(ph)TIAEQTVAK_	-2.56544	-1.3065	-3.99013	-0.298099	-1.93597		S	358	2	___1	0.999237	UID1720	-1.11857	-0.667516	1.8643	0.0843364
F8VPU2	Farp1	AKETKACTLELGPHQSPALPKSPPGSKAADG	_ACTLELGPHQS(ph)PALPK_	2.6121	2.52727	2.78344	2.60124	2.60667	Up	S	427	3	___1	1	UID1721	1.08644	1.29419	-1.37861	-1.21615
F8VPU2	Farp1	CTLELGPHQSPALPKSPPGSKAADGTTVVPP	_ACTLELGPHQSPALPKS(ph)PPGSK_	NaN	2.97169	-0.0687729	3.53704	2.97169		S	433	3	___1	0.986718	UID1722	NaN	1.5216	-0.0130866	-1.6359
F8VPU2	Farp1	NVTLSPNLSPDNKQASPLISPLLNDQACPRT	_QAS(ph)PLISPLLNDQACPR_	1.87567	2.1186	1.31722	2.03748	1.95657		S	512	2	___1	1	UID1723	0.772815	1.08508	-0.676641	-0.963279
F8VPU2	Farp1	KVQFERKHSKIHSTRSLVSQPTAPNSEVPKQ	_S(ph)LVSQPTAPNSEVPK_	2.20312	1.55368	1.85336	2.05742	1.95539		S	373	2	___1	1	UID1725	0.912267	0.796016	-0.933325	-0.972223
F8VPU2	Farp1	LAEKSNGPTPELLASSPPDNKSPDEATAADQ	_SNGPTPELLASS(ph)PPDNK_	-1.80181	-0.884924	-0.52538	-0.0434234	-0.705152		S	875	2	___1	0.99955	UID1727	-0.793357	-0.4518	0.205518	-0.0298973
F8VPU2	Farp1	PDNKSPDEATAADQESEDDLSASRTSLERQA	_SPDEATAADQES(ph)EDDLSASR_	1.35021	1.29342	1.27727	1.11225	1.28534		S	892	2	___1	1	UID1728	0.549028	0.662844	-0.657513	-0.548269
F8VPV0	Pcnt;Pcnt	RALLQHENEVVHRRNSEIDELKSLIENLQEN	_RNS(ph)EIDELK_	-0.0894696	-0.0864854	-0.455854	-0.264247	-0.176858		S	1437	2	___1	1	UID1729	-0.0641028	-0.0432445	0.172231	0.0691522
F8VPZ3	Usp32;Usp32	RLRLPQIGSKNKLSNSKENLDTSKENGAGQI	_LSNS(ph)KENLDTSK_	-0.0864606	0.136394	0.0114391	-0.0914002	-0.0375107		S	1423	2	___1	0.998288	UID1730	-0.0628213	0.0708015	-0.0514888	-0.0083775
F8VPZ9	Gltscr1	TKGAGLGAQTPDSRASPAPAPQIPAAAPLKA	_AS(ph)PAPAPQIPAAAPLK_	0.13808	-0.85909	0.0572234	-0.0828806	-0.0128286		S	757	2	___1	1	UID1731	0.0328061	-0.438581	-0.0734084	-0.0121989
F8VPZ9	Gltscr1	PGAAEGAQGRPRGAGSPTPLPTKVDEATSGL	_GAGS(ph)PTPLPTK_	-0.230481	-0.933898	-0.886024	-1.03794	-0.909961		S	1427	2	___1	0.999866	UID1732	-0.124157	-0.47686	0.378179	0.416191
F8VQ05	Fryl	LRLSLVGDRRGDRRRSNTLDITDGRINHGGS	_S(ph)NTLDITDGR_	-4.4581	4.02782	-5.67806	-2.38438	-3.42124	Down	S	1958	2	___1	0.99723	UID1733	-1.92462	2.06202	2.6724	1.02013
F8VQ28	Pxn;Pxn	QWQPSGSRYAHQQPPSPLPVYSSSAKNSSAS	_YAHQQPPS(ph)PLPVYSSSAK_	NaN	-0.521755	-1.18885	0.011487	-0.521755		S	83	3	___1	0.998201	UID1735	NaN	-0.265969	0.523161	-0.0545271
F8VQ52	Adcy6;Adcy6	EEKAMLAKLQRTRANSMEGLMPRWVPDRAFS	_ANS(ph)M(ox)EGLM(ox)PR_	1.59857	0.781865	NaN	0.555515	0.781865		S	576	2	___1	1	UID1736	0.654802	0.401084	#VALUE!	-0.298549
F8VQ52	Adcy6;Adcy6	CAPRYMSCLKNAEPPSPTPAAHTRCPWQDEA	_NAEPPS(ph)PTPAAHTR_	1.39254	0.105082	1.41115	0.173002	0.782771		S	53	3	___1	0.994071	UID1737	0.567059	0.054779	-0.721611	-0.126974
F8VQ70	Scaper	AWEVKKMSPGRHVIQSPSTDRMNVTSTARRS	_HVIQS(ph)PSTDR_	2.68766	2.21399	0.533306	-0.171878	1.37365		S	184	2	___1	0.885783	UID1738	1.11863	1.13389	-0.301337	0.0277203
F8VQ70	Scaper	EVKKMSPGRHVIQSPSTDRMNVTSTARRSLN	_HVIQSPS(ph)TDR_	2.16274	1.63183	-0.370413	NaN	1.63183		S	186	2	___1	0.775762	UID1739	0.89507	0.836005	0.131326	#VALUE!
F8VQ72	Map3k1;Map3k1	REKTGKGLSATRLSASSEDISDRLAGVSVGL	_LSAS(ph)SEDISDR_	-0.614191	0.450795	-0.787037	0.945624	-0.081698		S	915	2	___1	0.990791	UID1740	-0.287571	0.231678	0.330788	-0.473531
F8VQ93	Phip;Phip	RKDHQPRRRLRNRAQSYDIQAWKKQCQELLN	_AQS(ph)YDIQAWK_	1.19578	-1.44598	-1.66196	-0.557367	-1.00167		S	1315	2	___1	1	UID1741	0.483261	-0.73889	0.749663	0.20063
F8VQ93	Phip;Phip	TRNQGRRTAFYNEDDSEEEQRQLLFEDTSLT	_TAFYNEDDS(ph)EEEQR_	NaN	-1.71796	-1.27953	-1.36102	-1.36102		S	1783	2	___1	1	UID1742	NaN	-0.878056	0.566572	0.561106
F8VQB6	Myo10;Myo10	TKTFTPYERLEKRRTSFLEGTLRRSFRTGSV	_RTS(ph)FLEGTLR_	-3.04243	-1.52844	-0.275673	NaN	-1.52844		S	1887	2	___1	0.999335	UID1746	-1.32171	-0.781083	0.0859685	#VALUE!
F8VQC1	Srp72;Srp72	TAGASSELDASKAVSSPPTSPRPGSAATISS	_AVSS(ph)PPTSPR_	1.63772	0.911026	1.12025	0.144469	1.01564		S	621	2	___1	0.995416	UID1748	0.671475	0.467175	-0.582339	-0.114176
F8VQC7	Ktn1;Ktn1	KKNKKKEIQNGTLRESDSEHVPRDFKLSDAS	_EIQNGTLRES(ph)DSEHVPR_	-0.169851	1.07561	-0.00885337	1.34077	0.533378		S	75	3	___1	0.999609	UID1751	-0.0983357	0.551393	-0.0417736	-0.650771
F8VQC9	Slc4a7;Slc4a7	LQDDEDTVHLPFERGSLLQIPVKTLKYSIDP	_GS(ph)LLQIPVK_	0.0406279	-2.3224	-0.805191	-1.05645	-0.93082		S	1057	2	___1	1	UID1752	-0.00869675	-1.18735	0.33948	0.424492
F8VQC9	Slc4a7	RIPLVRSFADIGKKHSDPHLLERNGILASPQ	_KHS(ph)DPHLLER_	0.305093	-1.3587	-0.561488	-0.927108	-0.744298		S	247	3	___1	1	UID1753	0.103934	-0.694228	0.222805	0.366476
F8VQC9	Slc4a7	DPHLLERNGILASPQSAPGNLDNSKSGEMKG	_NGILASPQS(ph)APGNLDNSK_	-0.4803	-2.38367	-1.59032	-0.10193	-1.03531		S	263	2	___1	1	UID1754	-0.23055	-1.2187	0.715366	-0.00365464
F8VQC9	Slc4a7;Slc4a10;Slc4a10	HQNEKRFTSRIPLVRSFADIGKKHSDPHLLE	_S(ph)FADIGKK_	-0.0706106	-1.87753	-1.0893	-1.20789	-1.14859		S	238	2	___1	1	UID1755	-0.0560711	-0.959711	0.4755	0.492417
F8VQK5	Sash1;Sash1	APILPLKKASPASPVSPSDCPSPREPRPSSG	_ASPASPVS(ph)PSDCPSPR_	-2.69537	-2.73992	-3.17891	-0.277709	-2.71765	Down	S	1014	2	___1	0.952563	UID1758	-1.17391	-1.40099	1.47591	0.0751904
F8VQK5	Sash1;Sash1	ILPLKKASPASPVSPSDCPSPREPRPSSGTE	_ASPAS(ph)PVSPS(ph)DCPSPR_	-2.25607	-2.30499	NaN	-0.28137	-2.25607		S	1016	2	___1	0.998918	UID1759	-0.986817	-1.17844	#VALUE!	0.0768328
F8VQK5	Sash1;Sash1	QGLSGRSPRDSGCYESSENLENAKTHKPSVL	_DSGCYES(ph)SENLENAK_	0.213398	0.716635	0.569619	NaN	0.569619		S	723	2	___1	0.843639	UID1760	0.0648829	0.367707	-0.318722	#VALUE!
F8VQK5	Sash1;Sash1	YPTLDGSSTCNSREQSDDETEDSVKFKRLHK	_EQS(ph)DDETEDSVK_	-0.624709	-1.23347	-2.65513	-0.508011	-0.92909		S	241	2	___1	0.999988	UID1761	-0.292051	-0.630148	1.22515	0.178492
F8VQK5	Sash1;Sash1	SQEKLLVDNQGLSGRSPRDSGCYESSENLEN	_LLVDNQGLSGRS(ph)PR_	0.240815	NaN	-0.558905	-1.16415	-0.558905		S	714	3	___1	0.999446	UID1762	0.0765591	NaN	0.221568	0.4728
F8VQK5	Sash1;Sash1	CETLEGPEPVESWPRSHSLDDLQGDADVGKN	_S(ph)HSLDDLQGDADVGK_	-1.4457	-1.4482	-1.22636	-0.122277	-1.33603		S	829	3	___1	0.984969	UID1764	-0.641694	-0.740022	0.541118	0.00547193
F8VQK5	Sash1;Sash1	TLEGPEPVESWPRSHSLDDLQGDADVGKNVP	_SHS(ph)LDDLQGDADVGK_	-1.06332	-0.956828	-1.5297	-0.0253121	-1.01007		S	831	2	___1	0.99981	UID1765	-0.478849	-0.488593	0.686344	-0.0380211
F8VQK5	Sash1;Sash1	SCDVPSVTDLSKNRRSLPVSICRSCETLEGP	_S(ph)LPVSICR_	-1.26248	-1.90553	-1.81244	-0.860305	-1.53746		S	805	2	___1	1	UID1766	-0.563668	-0.974036	0.82171	0.336512
F8VQK5	Sash1;Sash1	EMKKGLGSLSHGRTCSFGGFDLTNRSLHVGS	_TCS(ph)FGGFDLTNR_	-0.557768	-2.205	-0.733859	-1.27351	-1.00368		S	400	2	___1	0.999992	UID1767	-0.263542	-1.12727	0.305329	0.521855
F8VQN6	Arhgef12;Arhgef12	KLKVEHHDLSVAGLQSPDRVLGLESPLISSK	_VEHHDLSVAGLQS(ph)PDR_	-1.29994	0.664589	-1.66733	0.982635	-0.317675		S	1177	3	___1	1	UID1768	-0.57962	0.341075	0.752235	-0.490132
F8WGD2	Rin2;Rin2	ETMAPPIKSKKKRNSSFVLPKLVKSQLRKMS	_NSS(ph)FVLPK_	0.919459	-0.666117	2.09868	-1.32926	0.126671		S	450	2	___1	0.999982	UID1769	0.365581	-0.339838	-1.05077	0.546857
Q8BRG8	Tmem209;Tmem209;Tmem209	_________MMQGDVSPNPSLIDRTIKMRKE	_(ac)MMQGDVS(ph)PNPSLIDR_	-2.35864	0.424985	-0.931813	-0.108179	-0.519996		S	7	2	___1	0.999762	UID1771	-1.0305	0.218471	0.400101	-0.000851407
Q9DBS9	Osbpl3;Osbpl3	MSQLLESMDVLHRTYSAPAINAIQVPKPFSG	_TYS(ph)APAINAIQVPK_	NaN	-1.44462	-0.421156	-1.11181	-1.11181		S	250	2	___1	0.999838	UID1774	NaN	-0.738192	0.15562	0.449324
F8WHC5	Rsrc2	AAIDTERDGLALEKTSPDREKKKEQSDISIS	_DGLALEKTS(ph)PDR_	0.464859	-1.87687	-0.97309	-0.715201	-0.844145		S	17	2	___1	0.994758	UID1775	0.171975	-0.959374	0.419862	0.271426
F8WHC5	Rsrc2	ALEKTSPDREKKKEQSDISISPRASKHHYSR	_EQS(ph)DISISPR_	-0.685686	-1.43368	-1.15511	-0.874031	-1.01457		S	27	2	___1	0.999665	UID1776	-0.31802	-0.732596	0.507008	0.342669
F8WHC5	Rsrc2	KTSPDREKKKEQSDISISPRASKHHYSRSRS	_EQSDIS(ph)ISPR_	-0.870806	-1.52917	-1.29394	-1.04108	-1.16751		S	30	2	___1	0.987043	UID1777	-0.396859	-0.781454	0.573471	0.417596
F8WHC5	Rsrc2	SPDREKKKEQSDISISPRASKHHYSRSRSRS	_EQSDISIS(ph)PR_	NaN	-1.22806	-0.253732	-1.04445	-1.04445		S	32	2	___1	0.999966	UID1778	NaN	-0.627382	0.0754641	0.419107
F8WHC5	Rsrc2;Rsrc2;Rsrc2	NDKEHSSDKGRERLNSSENGEDRHKRKERKS	_LNS(ph)SENGEDR_	-1.10345	-3.59285	NaN	-0.636706	-1.10345		S	103	2	___1	0.995518	UID1779	-0.495939	-1.83743	#VALUE!	0.236217
J3QP99	Fam160a2;Fam160a2	LQPGRDGTGLGLGGGSPGASTPVLLPRGGAS	_DGTGLGLGGGS(ph)PGASTPVLLPR_	3.22147	2.58113	-1.13127	1.4889	2.03502		S	914	2	___1	0.999818	UID1781	1.34596	1.32176	0.495593	-0.717216
J3QP99	Fam160a2;Fam160a2	KFLSLIPRCCRHHAPSPPRPEHASWARGGPS	_HHAPS(ph)PPRPEHASWAR_	-0.593949	-1.22523	-0.90244	NaN	-0.90244		S	467	4	___1	0.999915	UID1782	-0.278951	-0.625934	0.386038	#VALUE!
J3QP99	Fam160a2;Fam160a2	PAPRRSDSLVRSRRPSLGELLLRHAHSPTRA	_RPS(ph)LGELLLR_	-2.75419	-2.1206	-2.90522	-0.744908	-2.43739	Down	S	877	2	___1	1	UID1784	-1.19896	-1.08409	1.34489	0.284751
F8WHT3	Prrc2b;Prrc2b	QEVGAPGGCTPNLRCSPLEPDFVPAEKKPEY	_CS(ph)PLEPDFVPAEK_	0.0779441	1.62614	NaN	0.180915	0.180915		S	870	2	___1	1	UID1787	0.00719549	0.833092	#VALUE!	-0.130523
F8WHT3	Prrc2b;Prrc2b;Prrc2b	SSSSSSSSIEEEVRESGSPAQEFSKYQKSLP	_ES(ph)GSPAQEFSK_	-0.113709	1.08311	0.0603641	1.03942	0.549892		S	619	2	___1	0.969961	UID1788	-0.0744258	0.555227	-0.074912	-0.515604
F8WHT3	Prrc2b;Prrc2b;Prrc2b	SSSSSSIEEEVRESGSPAQEFSKYQKSLPPR	_ESGS(ph)PAQEFSK_	0.167424	1.08311	0.0260588	0.620448	0.393936		S	621	2	___1	0.998551	UID1789	0.0453032	0.555227	-0.0584881	-0.327674
F8WHT3	Prrc2b;Prrc2b;Prrc2b	EGGGRNIISAASLSASPTELGSRNASGADGA	_NIISAASLSAS(ph)PTELGSR_	NaN	0.623107	-0.376185	-0.693543	-0.376185		S	226	2	___1	0.990002	UID1791	NaN	0.319849	0.134089	0.261711
F8WHU5	Pds5b;Pds5b	KQHRTSKRAQQSRAESPETSAVESTQSTPQK	_AES(ph)PETSAVESTQSTPQK_	0.0553526	-0.271598	-0.235949	0.317463	-0.0902982		S	1359	2	___1	0.999977	UID1792	-0.00242579	-0.137965	0.0669503	-0.191771
F8WHU5	Pds5b;Pds5b	QSTPQKGRGRPSKAPSPSQPPKKIRVGRSKQ	_APS(ph)PSQPPKK_	-0.0904613	-0.335513	0.141104	-0.406674	-0.212987		S	1384	2	___1	1	UID1793	-0.0645251	-0.17067	-0.113567	0.133037
F8WHU5	Pds5b;Pds5b	KRHKEELLENEDEQNSPPKKGKRGRPPKPLG	_HKEELLENEDEQNS(ph)PPKK_	-0.385803	0.450795	-0.274821	0.191813	-0.041504		S	1283	3	___1	1	UID1794	-0.190306	0.231678	0.0855607	-0.135412
F8WHU5	Pds5b;Pds5b	RMETVSNASSSSNPSSPGRIKGRLDSSEMDH	_METVSNASSSSNPSS(ph)PGR_	NaN	-1.03948	-0.324393	-1.03143	-1.03143		S	1166	2	___1	0.998964	UID1795	NaN	-0.530885	0.109294	0.413269
F8WHU5	Pds5b;Pds5b	KPKGSQRGRKRGRTASDSDEQQWPEEKRHKE	_TAS(ph)DSDEQQWPEEK_	0.387303	-0.0665101	-0.0696544	-0.712801	-0.0680823		S	1257	2	___1	0.986343	UID1796	0.138945	-0.0330232	-0.0126646	0.27035
Q8K019	Bclaf1;Bclaf1	QEKQTKKAEGEPQEESPLKSKSQEEPKDTFE	_KAEGEPQEES(ph)PLK_	-0.270405	-0.684662	-0.398891	-0.543904	-0.471398		S	177	3	___1	1	UID1798	-0.14116	-0.349327	0.14496	0.194591
Q8K019	Bclaf1;Bclaf1	PEQVKSEKLKELFDYSPPLHKSLDAREKSIF	_LKELFDYS(ph)PPLHK_	0.0580322	-0.418079	-0.526948	-0.622475	-0.472513		S	510	3	___1	1	UID1800	-0.00128459	-0.212919	0.206268	0.229834
Q8K019	Bclaf1;Bclaf1	EDKGSDRITVKKEVQSPEQVKSEKLKELFDY	_KEVQS(ph)PEQVK_	-0.210346	-0.719321	-0.61117	-0.701849	-0.656509		S	494	2	___1	1	UID1801	-0.115582	-0.367062	0.246591	0.265437
Q8K019	Bclaf1;Bclaf1	DYFSDKESAKQKFHDSEGDDTEETEDYRQFR	_FHDS(ph)EGDDT(ph)EETEDYR_	-0.269546	0.17664	-0.595637	0.266041	-0.046453		S	395	2	___1	1	UID1802	-0.140794	0.0913952	0.239154	-0.168707
Q8K019	Bclaf1;Bclaf1	STRQKSPEIHRRIDISPSALRKHTRLAGEER	_IDIS(ph)PSALR_	-0.164415	-0.732332	-0.508345	-0.64189	-0.575117		S	656	2	___1	0.999839	UID1803	-0.0960208	-0.37372	0.197362	0.238542
Q8K019	Bclaf1;Bclaf1	SAKNTPSQHSHSIQHSPERSGSGSVGNGSSR	_NT(ph)PSQHSHSIQHS(ph)PER_	-0.0782263	NaN	-0.337495	1.29913	-0.0782263		S	267	3	___1	0.999738	UID1804	-0.0593145	NaN	0.115566	-0.632092
Q8K019	Bclaf1;Bclaf1	HKSLDAREKSIFREESPLRIKMIASDSHRPE	_SIFREES(ph)PLR_	0.0964322	-0.482433	-0.491214	-0.467686	-0.475059		S	529	3	___1	1	UID1805	0.0150693	-0.245848	0.18916	0.160404
Q8K019	Bclaf1;Bclaf1	ERSGSGSVGNGSSRYSPSQNSPIHHIPSRRS	_YS(ph)PSQNSPIHHIPS(ph)R_	-1.53784	1.5983	-1.08583	1.15229	0.03323		S	284	2	___1	0.997492	UID1806	-0.680937	0.818851	0.473839	-0.566229
Q8K019	Bclaf1;Bclaf1	GSVGNGSSRYSPSQNSPIHHIPSRRSPAKTI	_YS(ph)PSQNS(ph)PIHHIPSR_	-0.100715	1.06598	0.00716378	NaN	0.00716378		S	289	2	___1	0.999994	UID1808	-0.0688919	0.546462	-0.0494419	#VALUE!
F8WI30	Snx7	________MDGERLASGSSELAVGESPRGGA	_LAS(ph)GSS(ph)ELAVGESPR_	-0.10331	NaN	1.61087	-0.186045	-0.10331		S	8	2	___1	0.997259	UID1810	-0.069997	NaN	-0.817231	0.0340748
F8WI30	Snx7	GERLASGSSELAVGESPRGGAPIPSGSGSCS	_LASGSSELAVGES(ph)PR_	-0.442278	NaN	-0.295482	0.643458	-0.295482		S	18	2	___1	1	UID1813	-0.214357	NaN	0.0954519	-0.337995
F8WIE5	Hectd1;Hectd1	RRRAWDDDYVLKRQFSALVPAFDPRPGRTNV	_RQFS(ph)ALVPAFDPR_	0.605911	-0.225137	-0.0790638	1.20206	0.263424		S	1772	3	___1	1	UID1816	0.232047	-0.114191	-0.00815982	-0.588552
F8WIJ0	Slc12a4;Slc12a4;Slc12a4	LDIRPKVSSLLGKLVSYTNLTQGAKEHEEAE	_LVS(ph)YTNLTQGAK_	-1.49961	-0.580644	-1.49807	0.191071	-1.03936		S	90	2	___1	0.999974	UID1819	-0.664654	-0.296102	0.671203	-0.135079
F8WIX5	Pip5k1a;Pip5k1a;Pip5k1a	RFMCNTVFKKIPLKPSPTKKFRSGPSFSRRS	_IPLKPS(ph)PTK_	-1.55336	-1.37719	-1.88854	-1.80844	-1.6809		S	444	2	___1	0.998348	UID1822	-0.687544	-0.703689	0.85814	0.761796
F8WJ40	Wbp7;Wbp7;Wbp7	DESMEAKRDRASGPESPLQGPRIKHVCRHAA	_ASGPES(ph)PLQGPR_	-0.843221	0.0469409	-1.11971	-1.14975	-0.981465		S	866	2	___1	0.999997	UID1823	-0.385111	0.0250289	0.490057	0.46634
F8WJ93	Eml4;Eml4	KEDSHSNDQSPQIRASPSPQPSSQPLQINRQ	_AS(ph)PS(ph)PQPSSQPLQINR_	0.720197	-0.962055	1.00269	-0.864124	-0.0719635		S	144	2	___1	1	UID1825	0.280719	-0.491267	-0.526057	0.338225
F8WJ93	Eml4;Eml4	DSHSNDQSPQIRASPSPQPSSQPLQINRQTP	_AS(ph)PS(ph)PQPSSQPLQINR_	1.19796	-0.0479075	1.09755	-0.729824	0.524821		S	146	2	___1	0.999999	UID1826	0.48419	-0.0235044	-0.571472	0.277985
F8WJ98	Tmcc1;Tmcc1	DDGGKALGVISNFQSSPKYGSEEDCSSATSG	_ALGVISNFQSS(ph)PK_	1.48836	2.23855	0.673232	1.90853	1.69844		S	451	2	___1	0.999997	UID1827	0.607863	1.14646	-0.368328	-0.90544
F8WJ98	Tmcc1;Tmcc1;Tmcc1	SKPREIASLIRNKFGSADNIPNLKDSLEEGQ	_NKFGS(ph)ADNIPNLK_	1.17317	1.5261	0.739739	1.49753	1.33535		S	419	2	___1	1	UID1828	0.473631	0.781905	-0.400168	-0.721088
F8WJA0	Ddx24;Ddx24	LFSSEETKKRKAQAVSEEEEEEEGQSSSPKK	_AQAVS(ph)EEEEEEEGQSSSPK_	-3.06051	-1.57716	-2.2837	-2.71419	-2.49894	Down	S	126	2	___1	1	UID1829	-1.32941	-0.806014	1.04733	1.16806
F8WJA0	Ddx24;Ddx24	MPPREMRFGATAHLGSPCKDRTESGVLPEEA	_FGATAHLGS(ph)PCK_	-1.91251	-0.890869	-1.32196	-2.97209	-1.61723		S	334	2	___1	1	UID1832	-0.8405	-0.454842	0.586885	1.28374
F8WJA0	Ddx24;Ddx24	KKNKGKKKLDTFQSTSPKLPKKSKKTWMAEV	_KLDTFQSTS(ph)PK_	-3.53216	-1.81431	-1.88038	-3.19658	-2.53848		S	216	2	___1	0.999802	UID1833	-1.53028	-0.927359	0.854235	1.38444
F8WJD4	Sympk;Sympk	PKEAAAVGSSSKDERSPQNLSHAVEEALKTS	_S(ph)PQNLSHAVEEALK_	-0.691942	-0.91536	-1.70908	-2.00883	-1.31222		S	1260	2	___1	1	UID1834	-0.320684	-0.467374	0.772224	0.851679
Q69Z36	Mex3b;Mex3b	LVHRRLHPGTSCPRLSPPLHMATGAGEHHLA	_LS(ph)PPLHMATGAGEHHLAR_	0.882182	4.32071	0.16605	3.56313	2.22266		S	474	4	___1	1	UID1836	0.349705	2.21188	-0.12551	-1.6476
G3UW83	Tonsl;Tonsl	CPARPRTRVKQSRLTSLDGWCARTQAGDGSL	_LTS(ph)LDGWCAR_	0.0589475	2.03512	-1.84045	0.0853469	0.0721472		S	873	2	___1	0.99999	UID1837	-0.000894759	1.04236	0.835116	-0.0876567
G3UW90	Trps1;Trps1	ETGPVQSGQANCQGLSPVSVASKNPQVPSDG	_ATEETGPVQSGQANCQGLS(ph)PVSVASK_	-1.85119	-1.51848	0.27793	-2.22824	-1.68484		S	178	3	___1	0.99811	UID1838	-0.814387	-0.775984	-0.179074	0.950095
G3UWA5	Zfp385a	PRPVSMENGLGPAPGSPEKQPGSPSPPSVPE	_PVSMENGLGPAPGS(ph)PEK_	1.32954	0.634829	1.94011	0.777318	1.05343		S	153	2	___1	1	UID1841	0.540226	0.325847	-0.974858	-0.398037
G3UWA5	Zfp385a	NGLGPAPGSPEKQPGSPSPPSVPESGQGVTK	_QPGS(ph)PSPPSVPESGQGVTK_	NaN	2.37091	2.1105	2.4064	2.37091	Up	S	160	2	___1	0.991708	UID1842	NaN	1.21419	-1.05643	-1.12876
G3X959	Pphln1;Pphln1;Pphln1;Pphln1	RDRSPHKRDAPFFRESPVGRKDSPHSRSGSS	_DAPFFRES(ph)PVGR_	-0.883452	-1.74765	-0.502558	-0.883402	-0.883427		S	147	3	___1	1	UID1844	-0.402245	-0.89325	0.194591	0.346872
G3UWG2	Tiam1;Tiam1	TEASPRQLSTCQRANSLGDLYAQKNSGVKAN	_ANS(ph)LGDLYAQK_	3.58301	1.90971	4.68085	8.34706	4.13193	Up	S	231	2	___1	1	UID1845	1.49994	0.978196	-2.28701	-3.79342
G3UXL4	Rfc1;Rfc1;Rfc1;Rfc1;Rfc1	TPKKTKVSPTKRESVSPEDSEKKRTNYQAYR	_RES(ph)VS(ph)PEDSEK_	-0.136507	-1.21659	0.333226	-1.14136	-0.638933		S	379	2	___1	0.999999	UID1847	-0.0841349	-0.621511	-0.205547	0.462576
G3UXL4	Rfc1;Rfc1;Rfc1;Rfc1;Rfc1	VKKNEENVKTKNKPLSPIKLTPTSVLDYFGT	_NKPLS(ph)PIK_	-0.125321	0.514658	0.491378	-0.181958	0.183029		S	155	2	___1	1	UID1850	-0.0793713	0.264356	-0.281263	0.032242
G3UXL4	Rfc1;Rfc1;Rfc1;Rfc1;Rfc1	FSSVQDDLSKAEKQKSPNKAELFSTARKTYS	_QKS(ph)PNKAELFSTAR_	0.2421	0.271104	0.444252	-0.414876	0.256602		S	280	3	___1	1	UID1851	0.0771063	0.139731	-0.258701	0.136716
Q07174	Map3k8;Map3k8	DVLLVPWKLTYRNIGSGFVPRGAFGKVYLAQ	_NIGS(ph)GFVPR_	3.69121	3.00207	3.2495	4.11533	3.47035	Up	S	141	2	___1	1	UID1852	1.54602	1.53715	-1.60174	-1.89529
G3UX26	Vdac2;Vdac2;Vdac2	DQICQGLKLTFDTTFSPNTGKKSGKIKSAYK	_LTFDTTFS(ph)PNTGK_	-1.15913	-0.717321	-1.21245	-0.582736	-0.938225		S	116	2	___1	0.999997	UID1855	-0.519652	-0.366039	0.53446	0.212009
G3UXA6	Rod1;Rod1;Ptbp3;Rod1	NGNDNKKFKGDRPPCSPSRVLHLRKIPCDVT	_FKGDRPPCS(ph)PSR_	1.30123	NaN	-0.485129	0.138626	0.138626		S	58	2	___1	0.996905	UID1856	0.528171	NaN	0.186247	-0.111555
Q7TSJ6	Lats2;Lats2;Lats2;Lats2	AKGDKAGRDKKQIQTSPVPVRKNSRDEEKRE	_QIQTS(ph)PVPVR_	-3.65927	-1.10513	-3.4697	NaN	-3.4697		S	534	2	___1	0.994724	UID1857	-1.58441	-0.564478	1.61513	#VALUE!
Q8C3P7	Mettl3;Mettl3;Mettl3	QDSGHLDLRNPEAALSPTFRSDSPVPTAPTS	_NPEAALS(ph)PTFR_	-1.3711	NaN	-0.303931	0.390811	-0.303931		S	43	2	___1	0.99586	UID1860	-0.609927	NaN	0.0994973	-0.224671
G3UYG6	Gigyf2;Gigyf2;Gigyf2;Gigyf2;Gigyf2	GPEWLRALSSGGSITSPPLSPALPKYKLADY	_ALSSGGSITS(ph)PPLSPALPK_	-1.80992	-1.66259	-1.28156	-2.14545	-1.73625		S	26	2	___1	0.993771	UID1861	-0.796811	-0.849726	0.567545	0.912956
G3UYG6	Gigyf2;Gigyf2;Gigyf2;Gigyf2	GVFGRGGGREMHRSQSWEERGDRRFEKPGRK	_SQS(ph)WEER_	-1.13561	-1.4276	-1.72176	-2.08022	-1.57468		S	161	2	___1	1	UID1864	-0.509635	-0.729483	0.778293	0.883699
G3UYW1	Wdfy3;Wdfy3;Wdfy3	EALVPTTQSKLSRVSSGFGLSKLTGSRRNRK	_VSS(ph)GFGLSK_	1.60072	1.55157	0.473196	2.5157	1.57614		S	2277	2	___1	0.999877	UID1866	0.655718	0.794936	-0.272559	-1.17778
P63013-2	Prrx1;Prrx1	GHVLERQPALGGRLDSPGNLDTLQAKKNFSV	_LDS(ph)PGNLDTLQAK_	2.01112	2.45082	2.6686	2.09659	2.27371	Up	S	21	2	___1	1	UID1871	0.830499	1.25508	-1.32362	-0.989793
Q8BWW9	Pkn2;Pkn2;Pkn2	DFDLEPEPPPAPPRASSLGETDESSELRVLD	_AS(ph)SLGETDESSELR_	-0.325733	-0.743423	-0.0605513	0.0311543	-0.193142		S	581	2	___1	0.846884	UID1872	-0.164723	-0.379395	-0.0170228	-0.0633488
Q8BWW9	Pkn2;Pkn2;Pkn2	FDLEPEPPPAPPRASSLGETDESSELRVLDI	_ASS(ph)LGETDESSELR_	-0.389593	-0.569278	0.128221	-0.00204611	-0.19582		S	582	2	___1	0.842623	UID1873	-0.19192	-0.290286	-0.107399	-0.0484569
Q8BWW9	Pkn2;Pkn2;Pkn2	VPGRSKATSVALPGWSPSDNRSSFMSRTSKS	_ATSVALPGWS(ph)PSDNR_	-0.206898	1.5501	0.189017	1.42213	0.805573		S	359	2	___1	0.997732	UID1874	-0.114113	0.794187	-0.136506	-0.687265
G3UZT5	Mecom;Mecom;Mecom;Mecom;Mecom	KEKCKENGKMFKDKVSPLQNLASITNKKEHN	_DKVS(ph)PLQNLASITNK_	-1.88809	-3.40226	-0.977142	NaN	-1.88809		S	436	3	___1	1	UID1875	-0.830101	-1.7399	0.421802	#VALUE!
G3UZT5	Mecom;Mecom;Mecom;Mecom;Mecom;Mecom;Mecom	TEIRNFIGNSNHGSQSPRNMEERMNGSHFKD	_NFIGNSNHGSQS(ph)PR_	-2.08312	-2.04814	-1.15427	-2.65525	-2.06563	Down	S	860	2	___1	0.999921	UID1876	-0.913162	-1.04701	0.506602	1.14163
O89090	Sp1;Sp1	______________MSDQDHSMDEVTAVVKI	_(ac)S(ph)DQDHSMDEVTAVVK_	-0.153499	-0.00394722	0.0743304	-0.455865	-0.0787231		S	2	2	___1	0.999923	UID1877	-0.0913715	-0.00101024	-0.0815985	0.155102
O89090	Sp1;Sp1	_________MSDQDHSMDEVTAVVKIEKDVG	_(ac)SDQDHS(ph)MDEVTAVVK_	NaN	-0.551234	0.254786	-1.97677	-0.551234		S	7	2	___1	0.996435	UID1878	NaN	-0.281053	-0.167993	0.837297
G3X8R8	Mkl2;Mkl2;Mkl2	PLAPLQNGPSLASKPSSPPPPQQFVVQHSLF	_PS(ph)SPPPPQQFVVQHSLFATPITK_	-1.04055	-0.506844	-1.1053	-0.0152242	-0.773697		S	849	3	___1	0.886246	UID1880	-0.46915	-0.258339	0.483158	-0.0425459
Q99MQ1	Bicc1;Bicc1	VEGCNDAFVEVGMPRSPSHSGNAGDLKQMLG	_S(ph)PSHSGNAGDLK_	2.73307	1.68673	4.35406	-0.726639	2.2099		S	635	2	___1	0.981454	UID1882	1.13796	0.864097	-2.13055	0.276556
G3X8T2	Zc3h18;Zc3h18;Zc3h18;Zc3h18	ESGSEQDLDGAGERASDLEEEENATRVQSQE	_AS(ph)DLEEEENATR_	-0.300951	-0.463739	-0.279078	-0.166193	-0.290015		S	45	2	___1	1	UID1883	-0.154169	-0.236282	0.0875986	0.0251707
G3X8T2	Zc3h18;Zc3h18;Zc3h18;Zc3h18	WRRSKSPKKKLGVSVSPSRARRRRKTSASSA	_LGVSVS(ph)PSR_	-0.118349	-0.209282	-0.235086	-0.431509	-0.222184		S	554	2	___1	0.999985	UID1885	-0.076402	-0.106079	0.066537	0.144177
G3X8T2	Zc3h18;Zc3h18;Zc3h18;Zc3h18	EEENATRVQSQEETRSDEEDRASEPKSQDQD	_VQSQEETRS(ph)DEEDR_	-0.874689	0.487533	0.263024	2.3939	0.375278		S	64	3	___1	0.945888	UID1887	-0.398513	0.250477	-0.171937	-1.12315
G3X8T2	Zc3h18;Zc3h18;Zc3h18;Zc3h18	LNKAADKGSRKRYEPSDKDRQSPPAKKANLS	_YEPS(ph)DKDRQSPPAK_	-0.307668	NaN	0.348659	0.576828	0.348659		S	856	2	___1	0.96453	UID1888	-0.157029	NaN	-0.212935	-0.308109
G3X8T2	Zc3h18;Zc3h18;Zc3h18;Zc3h18	KGSRKRYEPSDKDRQSPPAKKANLSPDRGSR	_YEPSDKDRQS(ph)PPAK_	-0.718531	-0.644965	0.0935561	-0.0455242	-0.345245		S	862	2	___1	1	UID1889	-0.332008	-0.329015	-0.090803	-0.028955
O88622	Parg;Parg;Parg	KVEKLENVPQLNLDKSPTEKSSQYLNQQQTA	_LENVPQLNLDKS(ph)PTEK_	-0.196757	-0.333704	-0.490157	-0.259031	-0.296368		S	135	2	___1	0.999472	UID1890	-0.109795	-0.169745	0.188654	0.0668125
G3X8Y3	Naa15;Naa15	LTDENKEHEADTANMSDKELKKLRNKQRRAQ	_EHEADTANMS(ph)DK_	0.205617	NaN	-0.578482	0.19871	0.19871		S	588	2	___1	0.999993	UID1895	0.0615688	NaN	0.230941	-0.138505
G3X915	Lysmd2;Lysmd2	___________MADLSPAPALREGGPRAHRP	_(ac)ADLS(ph)PAPALR_	5.21426	2.7605	6.44769	4.28256	4.74841	Up	S	5	2	___1	1	UID1896	2.19465	1.41354	-3.13289	-1.9703
G3X948	Papd7;Papd7	YRRWIKEKWGSRILPSPDLDNRIKIKERITT	_ILPS(ph)PDLDNR_	-0.890936	-2.13739	-0.796605	-1.52879	-1.20986		S	309	2	___1	1	UID1899	-0.405432	-1.09268	0.335369	0.636358
G3X956	Supt16h;Supt16h	REAEEKEKEGIVKQDSLVINLNRSNPKLKDL	_QDS(ph)LVINLNR_	-1.25958	-0.433316	-1.54948	-0.850867	-1.05522		S	650	2	___1	1	UID1900	-0.562431	-0.220715	0.695816	0.332278
G3X961	Klhdc4;Klhdc4;Klhdc4;Klhdc4	TIKQVLTPSGLGVQPSPKADDSASEASSTGQ	_QVLTPSGLGVQPS(ph)PK_	0.863522	2.01575	2.47613	NaN	2.01575		S	412	2	___1	1	UID1901	0.341758	1.03245	-1.23148	#VALUE!
G3X963	Atad2;Atad2	DESSVEESDKQNRLESNIDLKNNSSSSNIEN	_LES(ph)NIDLK_	1.89978	3.13035	3.3173	NaN	3.13035		S	1207	2	___1	1	UID1902	0.783079	1.60279	-1.6342	#VALUE!
Q9JM52-3	Mink1;Mink1;Mink1;Mink1	PPGPPAQPPGPPNASSNPDLRRSDPGWERSD	_GTPKPPGPPAQPPGPPNASS(ph)NPDLR_	-1.71493	-1.27165	-0.237962	-1.26072	-1.26619		S	736	3	___1	0.886171	UID1903	-0.756355	-0.649684	0.067914	0.516116
Q9JM52-3	Mink1;Mink1;Mink1;Mink1;Mink1	LERNRNRVGASTKLDSSPVLSPGNKAKPEDH	_LDS(ph)SPVLSPGNK_	0.350182	NaN	0.310034	0.337473	0.337473		S	782	2	___1	0.987177	UID1905	0.123136	NaN	-0.194443	-0.200747
Q9JM52-3	Mink1;Mink1;Mink1;Mink1;Mink1	ERNRNRVGASTKLDSSPVLSPGNKAKPEDHR	_LDSS(ph)PVLSPGNK_	0.540386	0.760217	0.635274	0.209135	0.58783		S	783	2	___1	0.99998	UID1906	0.204141	0.390007	-0.350155	-0.143182
Q9JM52-3	Mink1;Mink1;Mink1;Mink1;Mink1	DSVLPASHGHLPQAGSLERNRNRVGASTKLD	_SDSVLPASHGHLPQAGS(ph)LER_	NaN	0.703713	-0.33666	-0.59576	-0.33666		S	766	3	___1	0.999957	UID1907	NaN	0.361095	0.115166	0.217851
G3X9J0	Sipa1l3	ESAGRPHPVDRRREVSPAPVVAGQNKGYRPK	_REVS(ph)PAPVVAGQNK_	-0.631809	-3.1307	-0.778399	-0.046115	-0.705104		S	1358	2	___1	1	UID1908	-0.295075	-1.60095	0.326652	-0.02869
G3X9J0	Sipa1l3	ASSGSRAFHRLSRRRSKDVEFQDGWPRSPGR	_S(ph)KDVEFQDGWPR_	-3.40805	-2.58845	-3.84916	-0.426557	-2.99825	Down	S	140	2	___1	1	UID1909	-1.47742	-1.32348	1.79681	0.141956
G3X9J0	Sipa1l3	RDTGQSPQKSLQRTLSDESLCSGRREPSFAS	_TLS(ph)DESLCSGR_	-1.57877	-1.51264	-2.56472	-0.59576	-1.5457		S	1538	2	___1	0.999963	UID1910	-0.698366	-0.772998	1.18187	0.217851
G3X9J4	2310035C23Rik;Kiaa1468;2310035C23Rik	EPSTTSGGGQLNRAGSISTLDSLDFARYSDD	_AGS(ph)ISTLDSLDFAR_	1.55483	1.95402	1.5608	2.56468	1.75741		S	180	2	___1	0.998385	UID1911	0.636172	1.00087	-0.793257	-1.19975
G3X9W0	Hnrnpd;Hnrnpd;Hnrnpd;Hnrnpd;Hnrnpd;Hnrnpd	MKTKEPVKKIFVGGLSPDTPEEKIREYFGGF	_IFVGGLS(ph)PDTPEEK_	-0.993886	-0.727769	NaN	0.162483	-0.727769		S	190	2	___1	0.999985	UID1915	-0.449277	-0.371385	#VALUE!	-0.122256
G5E823	Hars2;Hars2	KPNFVIKVPKGTRDLSPQQMVVREKILDKII	_DLS(ph)PQQM(ox)VVR_	-0.0689559	-0.578118	-0.614217	-0.0779142	-0.328016		S	66	2	___1	1	UID1917	-0.0553664	-0.294809	0.248049	-0.0144266
G5E833	Osbpl5;Osbpl5;Osbpl5	STHTMKEEAFLRRRFSLCPPASTPQKTDPRK	_RFS(ph)LCPPASTPQK_	1.00795	1.55254	1.02215	2.08384	1.28734		S	36	2	___1	1	UID1919	0.403268	0.795434	-0.535374	-0.984074
G5E866	Sf3b1;Sf3b1	WDETPKTERDTPGHGSGWAETPRTDRGGDSI	_DTPGHGS(ph)GWAETPR_	-0.971482	-1.61543	0.410337	0.161363	-0.40506		S	308	2	___1	0.991502	UID1920	-0.439735	-0.825594	-0.242465	-0.121753
G5E866	Sf3b1;Sf3b1	GELKVVNGAAASQPPSKRKRRWDQTADQTPG	_VVNGAAASQPPS(ph)K_	0.537739	0.0610375	0.0480109	-0.339096	0.0545242		S	194	2	___1	0.999992	UID1923	0.203013	0.032242	-0.0689978	0.102725
G5E866	Sf3b1;Sf3b1	RKSRWDETPASQMGGSTPVLTPGKTPIGTPA	_WDETPASQMGGS(ph)TPVLTPGK_	-0.537416	-1.26083	-0.4785	-0.2014	-0.507958		S	349	2	___1	0.896009	UID1925	-0.254875	-0.644149	0.183074	0.0409626
G5E870	Trip12	VGGKRGRAQTAPTKTSPRNAKKHDELWHDGV	_AQTAPTKTS(ph)PR_	-0.332422	-0.47372	-1.22056	-0.68064	-0.57718		S	1460	2	___1	0.974395	UID1926	-0.167572	-0.24139	0.538339	0.255924
G5E870	Trip12	SADLGSPSLQHSRDDSLDLSPQGRLSDVLKR	_DDS(ph)LDLSPQGR_	-0.786148	NaN	-0.482214	0.0534122	-0.482214		S	1020	2	___1	1	UID1927	-0.360805	NaN	0.184852	-0.0733326
G5E870	Trip12	GSPSLQHSRDDSLDLSPQGRLSDVLKRKRLP	_DDSLDLS(ph)PQGR_	-0.213504	1.58886	0.861631	0.812132	0.836882		S	1024	2	___1	1	UID1928	-0.116927	0.814017	-0.458525	-0.413653
G5E870	Trip12	QAVRQFSVQAEDERESTDDESNPLGRAGIWT	_ES(ph)TDDESNPLGR_	-0.705168	0.305948	NaN	-0.288072	-0.288072		S	1409	2	___1	0.837674	UID1929	-0.326317	0.157561	#VALUE!	0.0798389
G5E870	Trip12	MHQVKHLAESESLLTSPPKACTNGSGSLGST	_HLAESESLLTS(ph)PPK_	-1.00965	NaN	0.167891	-10.9189	-1.00965		S	975	2	___1	0.998866	UID1930	-0.45599	NaN	-0.126392	4.84825
G5E870	Trip12	LQAKLASLRKSTKKRSESPPAELPSLRRSTR	_S(ph)ESPPAELPSLR_	-0.425812	-0.294962	-0.51622	-1.74078	-0.471016		S	310	2	___1	0.817548	UID1931	-0.207345	-0.149921	0.201132	0.731444
G5E870	Trip12	AKLASLRKSTKKRSESPPAELPSLRRSTRQK	_SES(ph)PPAELPSLR_	-0.773123	-0.215115	-0.33666	-1.00232	-0.554891		S	312	2	___1	0.999983	UID1932	-0.355258	-0.109063	0.115166	0.40021
G5E884	Pak1;Pak1	PLPVTPTRDVATSPISPTENNTTPPDALTRN	_DVATSPIS(ph)PTENNTTPPDALTR_	NaN	0.752245	-0.973766	1.36963	0.752245		S	222	2	___1	0.960871	UID1935	NaN	0.385928	0.420186	-0.663716
G5E884	Pak1;Pak1	VIAPRPEHTKSVYTRSVIEPLPVTPTRDVAT	_S(ph)VIEPLPVTPTR_	3.27751	1.89881	1.82262	1.19462	1.86071		S	203	2	___1	1	UID1936	1.36983	0.972619	-0.918606	-0.585215
G5E884	Pak1;Pak1	EFYNSKKTSNSQKYMSFTDKSAEDYNSSNTL	_YMS(ph)FTDK_	2.28	0.958552	0.946331	0.73609	0.952441		S	144	2	___1	0.999994	UID1937	0.945008	0.491494	-0.499076	-0.379545
G5E8A0	Osbpl11;Osbpl11	SLASSGNSPISQRRPSQNAMSFFNVGHSKLQ	_RPS(ph)QNAM(ox)SFFNVGHSK_	-2.12052	-1.9208	-2.3814	-1.32639	-2.02066		S	200	3	___1	1	UID1941	-0.929089	-0.98185	1.0941	0.545573
G5E8A0	Osbpl11;Osbpl11	PPLKSRSFSLASSGNSPISQRRPSQNAMSFF	_SFSLASSGNS(ph)PISQR_	3.45883	0.892405	1.37809	0.0726235	1.13525		S	192	2	___1	0.999997	UID1943	1.44705	0.457647	-0.705782	-0.0819497
Q64512	Ptpn13;Ptpn13	APLSQQTFVNKGLSKSMGFLSIRDTRDEEDY	_S(ph)M(ox)GFLSIR_	-0.496355	-1.86227	-0.476642	-1.13949	-0.817922		S	240	2	___1	1	UID1946	-0.237388	-0.951903	0.182184	0.461738
Q64512	Ptpn13;Ptpn13	STPQMDALSKKKTWASSMDLLCAANRDISGE	_TWAS(ph)SMDLLCAANR_	NaN	-1.98489	0.55025	-0.132833	-0.132833		S	297	2	___1	0.846816	UID1948	NaN	-1.01465	-0.309449	0.0102069
G5E8J3	Wdr11;Wdr11	EGNSVKDSARIPPDGSMGSITCIAWKGDTLV	_IPPDGS(ph)M(ox)GSITCIAWK_	0.455525	0.443823	-0.101226	0.580972	0.449674		S	708	2	___1	0.999758	UID1950	0.168	0.228111	0.0024506	-0.309967
G5E8J3	Wdr11;Wdr11	SVKDSARIPPDGSMGSITCIAWKGDTLVLGD	_IPPDGSM(ox)GS(ph)ITCIAWK_	0.394678	0.317049	NaN	0.697616	0.394678		S	711	2	___1	0.847249	UID1951	0.142087	0.163241	#VALUE!	-0.362288
G5E8J4	Ptpn21;Ptpn21	ETHRPRRDGLLTPSMSESDLTTSGRYRARRD	_DGLLTPSMS(ph)ESDLTTSGR_	-1.1957	-1.49674	-1.76207	-1.86262	-1.6294		S	799	2	___1	0.967446	UID1953	-0.535227	-0.764861	0.797594	0.786095
G5E8J4	Ptpn21;Ptpn21	ANSTPDLSRHLYISSSNPDLITRRVHHSVQT	_HLYISSS(ph)NPDLITR_	NaN	-3.03072	-2.78703	-1.61313	-2.78703		S	590	2	___1	0.973633	UID1956	NaN	-1.54979	1.2883	0.67419
G5E8J4	Ptpn21;Ptpn21	GRYRARRDSVKKRPVSDLLSGKKSAVEGLPP	_RPVS(ph)DLLSGK_	-1.52056	-3.77419	-1.63893	-1.96956	-1.80424		S	822	2	___1	1	UID1957	-0.673578	-1.93022	0.738638	0.834064
G5E8J4	Ptpn21;Ptpn21	AKKIGPLKLAALNGLSLSRLPLPDEGKEVST	_LAALNGLS(ph)LSR_	1.32884	-0.590458	1.21927	-1.13879	0.314406		S	863	2	___1	0.999311	UID1958	0.539928	-0.301124	-0.629746	0.461424
G5E8J4	Ptpn21;Ptpn21	VYRPPPPYPYPRPANSTPDLSRHLYISSSNP	_PANS(ph)T(ph)PDLSR_	-1.43009	-2.46441	-1.58371	-2.05379	-1.81875		S	577	2	___1	1	UID1961	-0.635047	-1.26001	0.7122	0.871844
G5E8J4	Ptpn21;Ptpn21	SASAADVAPRTFSAGSQSSVFSDKMKQEGTE	_TFSAGS(ph)QSSVFSDK_	-1.0952	NaN	-1.31533	-3.00769	-1.31533		S	673	2	___1	0.80433	UID1963	-0.492424	NaN	0.583712	1.29971
G5E8J4	Ptpn21;Ptpn21	LTHGFEGLRLKERTVSASAADVAPRTFSAGS	_TVS(ph)ASAADVAPR_	-1.57042	NaN	-1.03882	-2.06449	-1.57042		S	658	2	___1	0.989747	UID1964	-0.694812	NaN	0.45133	0.876645
G5E8K5	Ank3;Ank3;Ank3;Ank3	VPSKEQHLTFTREFDSDSLRHYSWAADTLDN	_EFDS(ph)DSLR_	3.51428	0.786772	1.47889	-0.285332	1.13283		S	958	2	___1	0.988182	UID1965	1.47067	0.403595	-0.754042	0.0786098
G5E8K5	Ank3;Ank3;Ank3;Ank3	TLPAHKKAEKADRRQSFASLALRKRYSYLTE	_RQS(ph)FASLALR_	-0.344887	-1.25054	-2.18876	-0.712801	-0.981671		S	1451	2	___1	1	UID1966	-0.17288	-0.638883	1.00187	0.27035
G5E8L8	Map3k2;Map3k2	LGDFGASKRLQTICLSGTGMKSVTGTPYWMS	_LQTICLS(ph)GTGMK_	1.28593	-0.848145	-1.31171	2.22236	0.218893		S	514	2	___1	0.991875	UID1968	0.521654	-0.43298	0.581978	-1.04621
G5E8L8	Map3k2;Map3k2	DLNNTPLGAERKKRLSVVGPPNRDRSSPPPG	_RLS(ph)VVGPPNR_	-2.39503	-2.29289	-2.47753	-0.0693586	-2.34396	Down	S	153	2	___1	1	UID1969	-1.046	-1.17225	1.14012	-0.0182642
G5E8M1	Ptpn14;Ptpn14	HKFYKQNKICTEQSNSPPPIRRQPTWSRSSL	_ICTEQSNS(ph)PPPIR_	-1.72473	-2.55729	-1.24124	-2.47214	-2.09844		S	314	2	___1	0.999963	UID1970	-0.760529	-1.30754	0.548239	1.05949
G5E8M1	Ptpn14;Ptpn14	LFRPPPPYPRPRPATSTPDLASHRHKYVSGS	_PATS(ph)TPDLASHR_	0.355155	-1.99814	-1.38057	-1.98468	-1.68263		S	578	2	___1	0.997941	UID1971	0.125254	-1.02142	0.614945	0.840846
G5E8M1	Ptpn14;Ptpn14	STPDLASHRHKYVSGSSPDLVTRKVQLSVKT	_YVSGS(ph)S(ph)PDLVTR_	0.272152	-1.65447	0.625112	-1.25892	-0.493384		S	593	2	___1	0.999307	UID1973	0.0899048	-0.845572	-0.345289	0.515309
G5E8M1	Ptpn14;Ptpn14	TPDLASHRHKYVSGSSPDLVTRKVQLSVKTF	_YVSGS(ph)S(ph)PDLVTR_	-2.18663	-1.29109	-2.64751	-1.63222	-1.90943		S	594	2	___1	0.999979	UID1974	-0.957244	-0.659631	1.22151	0.682753
G5E8P2	Rgnef;Rgnef	VQQGLLGHCKHSRQRSLPAVFSPGSKEVTEL	_S(ph)LPAVFSPGSK_	-0.7785	-2.86327	1.08682	NaN	-0.7785		S	1535	2	___1	1	UID1975	-0.357548	-1.46411	-0.566335	#VALUE!
Q9D4H9-2	Phf14;Phf14	KKIPIRNTRTRGRKRSFVPEEEKHEERVPRE	_S(ph)FVPEEEKHEER_	-1.18776	0.0129309	-1.29819	0.334148	-0.587415		S	828	3	___1	1	UID1977	-0.531844	0.00762616	0.575506	-0.199255
G5E8T2	Ttc3;Ttc3;Ttc3;Ttc3;Ttc3;Ttc3	PSSEAVTPEDHSRRNSDSAGPFAVPDHLRQD	_RNS(ph)DSAGPFAVPDHLR_	-1.36904	0.0690219	-1.76173	-0.00311036	-0.686075		S	1060	3	___1	0.99766	UID1979	-0.609046	0.0363276	0.797428	-0.0479796
Q3V1Z0	Rusc2;Rusc2;Rusc2;Rusc2	PVRLSEGPAALAGPASPPRRVTSFAELAKGR	_LSEGPAALAGPAS(ph)PPR_	-0.753678	-2.83779	0.120116	0.246398	-0.316781		S	542	2	___1	1	UID1980	-0.346977	-1.45107	-0.103519	-0.159895
Q8BMQ3	Bnc2;Bnc2;Bnc2;Bnc2;Bnc2	NYGSPQKFSPEGDLCSSPDPKICYVCKKSFK	_FSPEGDLCS(ph)SPDPK_	2.50942	3.82764	3.74978	NaN	3.74978	Up	S	856	2	___1	0.860845	UID1982	1.04271	1.95958	-1.84125	#VALUE!
Q8BMQ3	Bnc2;Bnc2;Bnc2;Bnc2;Bnc2	YGSPQKFSPEGDLCSSPDPKICYVCKKSFKS	_FSPEGDLCSS(ph)PDPK_	2.5268	4.41119	3.27116	NaN	3.27116	Up	S	857	2	___1	0.957187	UID1983	1.05012	2.25819	-1.61211	#VALUE!
Q8BMQ3	Bnc2;Bnc2;Bnc2;Bnc2	_________MARFVPSPPPNCLSYKSEGRLG	_FVPS(ph)PPPNCLSYK_	1.42191	2.65647	4.50393	3.37173	3.0141	Up	S	7	2	___1	0.999995	UID1984	0.579566	1.36031	-2.20231	-1.56175
Q8BIE6-2	Frmd4a;Frmd4a;Frmd4a	RQRQRQRAAGALGSASSGSMPNLAARSGAAS	_AAGALGSAS(ph)SGSM(ox)PNLAAR_	0.159207	NaN	-0.0976137	-0.531232	-0.0976137		S	793	2	___1	0.94564	UID1987	0.0418037	NaN	0.000721131	0.188907
Q8BIE6-2	Frmd4a;Frmd4a;Frmd4a	QRQRQRAAGALGSASSGSMPNLAARSGAAST	_AAGALGSASS(ph)GSM(ox)PNLAAR_	0.426759	-0.446918	NaN	-0.295671	-0.295671		S	794	2	___1	0.756708	UID1988	0.155749	-0.227675	#VALUE!	0.0832474
Q8BIE6-2	Frmd4a;Frmd4a;Frmd4a	QRQRAAGALGSASSGSMPNLAARSGAASTGG	_AAGALGSASSGS(ph)M(ox)PNLAAR_	-0.131555	-0.450915	-0.133542	-0.201087	-0.167314		S	796	2	___1	0.99998	UID1989	-0.082026	-0.229721	0.017922	0.0408223
Q60875	Arhgef2;Arhgef2;Arhgef2;Arhgef2;Arhgef2;Arhgef2	SLHRPFDDREAQELGSPEDRLQDSSDPDTGS	_EAQELGS(ph)PEDR_	-2.03272	0.972555	-2.84398	2.23114	-0.530083		S	931	2	___1	1	UID1990	-0.891696	0.498659	1.31557	-1.05014
Q60875	Arhgef2;Arhgef2;Arhgef2;Arhgef2;Arhgef2;Arhgef2;Arhgef2;Arhgef2;Arhgef2	SDSFRQSLLGSRRGLSSLSLAKSVSTTNIAG	_GLS(ph)SLSLAK_	4.16334	1.71769	3.66178	1.56845	2.68973		S	142	2	___1	0.9998	UID1991	1.74709	0.879941	-1.79912	-0.752899
Q60875	Arhgef2;Arhgef2;Arhgef2;Arhgef2;Arhgef2;Arhgef2	GMPPPALPRGLFRLESFESLRGERLLKDALR	_LES(ph)FESLR_	-0.708525	0.260848	-1.84281	2.12875	-0.223838		S	646	2	___1	1	UID1992	-0.327747	0.134484	0.836247	-1.00422
Q60875	Arhgef2;Arhgef2;Arhgef2;Arhgef2;Arhgef2;Arhgef2;Arhgef2;Arhgef2;Arhgef2;Arhgef2;Arhgef2;Arhgef2;Arhgef2	QKAALLRNNTALQSVSLRSKTTTRERPTSAI	_NNTALQSVS(ph)LR_	3.21133	1.97339	3.25087	NaN	3.21133		S	109	2	___1	0.99996	UID1995	1.34164	1.01078	-1.60239	#VALUE!
Q60875	Arhgef2;Arhgef2;Arhgef2;Arhgef2;Arhgef2;Arhgef2;Arhgef2;Arhgef2;Arhgef2	FNDESPLGLRQILSQSTDSLNMRNRTLSVES	_QILSQS(ph)TDSLNMR_	2.51796	1.19318	1.81466	1.68232	1.74849		S	174	2	___1	0.999968	UID1997	1.04635	0.61155	-0.914793	-0.803972
Q60875	Arhgef2;Arhgef2;Arhgef2;Arhgef2;Arhgef2;Arhgef2;Arhgef2;Arhgef2;Arhgef2	GSRRGLSSLSLAKSVSTTNIAGHFNDESPLG	_SVS(ph)TTNIAGHFNDESPLGLR_	2.62833	1.60692	1.85509	1.96579	1.91044		S	151	2	___1	0.932577	UID1998	1.09336	0.82326	-0.934152	-0.931123
Q80WT5	Aftph;Aftph;Aftph	VEEEVSSLKHLLETHSSPAKTREALADRGEL	_HLLETHS(ph)SPAK_	NaN	0.596326	0.0771379	-0.490056	0.0771379		S	679	3	___1	0.918171	UID1999	NaN	0.306146	-0.0829426	0.170438
Q80WT5	Aftph;Aftph;Aftph	EEEVSSLKHLLETHSSPAKTREALADRGELR	_HLLETHSS(ph)PAK_	0.222131	0.507136	0.0353933	0.0138929	0.128762		S	680	2	___1	0.995221	UID2000	0.068602	0.260508	-0.062957	-0.0556063
Q80WT5	Aftph;Aftph	KVVVQGPSTGQLRSFSPGDFRTDKNIVHQTK	_SFS(ph)PGDFR_	0.595223	0.93782	0.737076	0.722895	0.729985		S	151	2	___1	1	UID2001	0.227495	0.480885	-0.398893	-0.373626
H3BJQ9	Cux1;Cux1;Cux1;Cux1	GRDQPESRRPGPLPASPPPQLPRNTGEQVSN	_RPGPLPAS(ph)PPPQLPR_	-2.50327	-1.95672	0.04858	-0.578289	-1.2675		S	429	3	___1	1	UID2002	-1.09209	-1.00023	-0.0692703	0.210015
H3BK65	Eps15;Eps15;Eps15	PCPPPPGKRPINKLDSSDPLKLNDPFQPFPG	_LDS(ph)SDPLK_	1.20062	1.28914	0.864406	-0.162081	1.03251		S	834	2	___1	0.999937	UID2003	0.485324	0.660655	-0.459854	0.0233263
H3BK65	Eps15;Eps15;Eps15	PLKLNDPFQPFPGNDSPKEKDPDMFCDPFTS	_LNDPFQPFPGNDS(ph)PKEK_	-1.05211	-0.607392	-0.87627	-0.416339	-0.741831		S	852	3	___1	1	UID2004	-0.474071	-0.309789	0.373509	0.137372
H3BK65	Eps15;Eps15;Eps15;Eps15	PPSDRSSLQKNITGSSPVADFSAIKELDTLN	_NITGSS(ph)PVADFSAIK_	-2.05884	-2.77634	-3.13152	-1.5923	-2.41759	Down	S	360	2	___1	0.999922	UID2006	-0.902821	-1.41962	1.45323	0.664847
Q80YV2	Zc3hc1;Zc3hc1	VPSSPLRRTKRARLCSSSSSDTSPRSFFDPT	_LCS(ph)SSSSDTSPR_	0.130787	-0.209677	-0.282762	-0.575786	-0.24622		S	406	2	___1	0.997124	UID2008	0.0297002	-0.106281	0.0893626	0.208892
Q80YV2	Zc3hc1;Zc3hc1;Zc3hc1	PGVEGRPEHFPLVPESPRRMMTRSQDATVSP	_PEHFPLVPES(ph)PRR_	-0.723694	-1.00736	-1.25419	-1.05669	-1.03202		S	320	3	___1	1	UID2010	-0.334207	-0.514449	0.554442	0.4246
H3BL37	Tcof1;Tcof1;Tcof1;Tcof1	GKTSQVRAASAPAKESPKKGAHPGTPGKTGS	_AASAPAKES(ph)PK_	-0.560901	-0.268528	NaN	-0.698636	-0.560901		S	794	2	___1	1	UID2011	-0.264876	-0.136395	#VALUE!	0.263996
H3BL37	Tcof1;Tcof1;Tcof1;Tcof1	SHCKAGAVTSSASLSSPALAKGTQRSDVDSS	_AGAVTSSASLSS(ph)PALAK_	-0.483361	-0.750069	-0.126689	-1.90486	-0.616715		S	593	2	___1	0.999301	UID2012	-0.231854	-0.382796	0.014641	0.805045
H3BL37	Tcof1;Tcof1	NKKKKEQPVPRASAVSPEKAPMTSKAKSKLD	_ASAVS(ph)PEKAPM(ox)TSK_	-0.764683	0.026919	-0.408415	-0.000282894	-0.204349		S	1252	2	___1	0.999994	UID2013	-0.351663	0.0147838	0.14952	-0.0492478
H3BL37	Tcof1;Tcof1	EAIKESGKKSQKRKLSGDLEAGAPKNKKKKE	_RKLS(ph)GDLEAGAPK_	-0.551918	0.0931127	-0.796366	0.308878	-0.229403		S	1227	3	___1	1	UID2015	-0.261051	0.0486547	0.335255	-0.187921
H3BL37	Tcof1;Tcof1	AKEKPDGELLGIKLESGEQSDPKSKSKKKKS	_LES(ph)GEQSDPK_	-0.722029	NaN	0.208957	-1.50866	-0.722029		S	1299	2	___1	0.997383	UID2017	-0.333498	NaN	-0.146052	0.627327
H3BL37	Tcof1;Tcof1	PDGELLGIKLESGEQSDPKSKSKKKKSLKKK	_LESGEQS(ph)DPK_	-1.32571	-0.333831	NaN	-1.69512	-1.32571		S	1303	2	___1	1	UID2018	-0.590593	-0.16981	#VALUE!	0.710966
H3BL37	Tcof1;Tcof1;Tcof1;Tcof1	SGQAIKSPPVSVNRNSSPAVPAPTPEGVQAV	_NS(ph)SPAVPAPTPEGVQAVNTTK_	-0.759975	-1.94288	-0.673014	-2.59433	-1.35143		S	888	3	___1	0.897496	UID2019	-0.349658	-0.993149	0.276199	1.1143
H3BL37	Tcof1;Tcof1;Tcof1;Tcof1	GQAIKSPPVSVNRNSSPAVPAPTPEGVQAVN	_NSS(ph)PAVPAPTPEGVQAVNTTK_	-0.900192	-1.94625	-0.761048	-2.55712	-1.42322		S	889	2	___1	0.901298	UID2020	-0.409374	-0.994873	0.318346	1.09761
H3BL37	Tcof1;Tcof1;Tcof1;Tcof1	SESSDEDLPSGQAIKSPPVSVNRNSSPAVPA	_S(ph)PPVSVNR_	-0.621807	-0.188511	-0.0538356	-0.64189	-0.405159		S	879	2	___1	1	UID2022	-0.290815	-0.0954504	-0.020238	0.238542
H3BL37	Tcof1;Tcof1;Tcof1;Tcof1;Tcof1	SVSHPGSGKTVVHLLSGKSPKKSAEPLANTV	_TVVHLLS(ph)GKSPK_	-0.629939	-0.627101	-0.275957	-2.84888	-0.62852		S	151	3	___1	0.995278	UID2023	-0.294279	-0.319874	0.0861043	1.22848
H3BL37	Tcof1;Tcof1;Tcof1;Tcof1;Tcof1	HPGSGKTVVHLLSGKSPKKSAEPLANTVLAS	_TVVHLLSGKS(ph)PK_	-0.753894	-0.57836	-0.560455	-2.49199	-0.666127		S	154	3	___1	0.999959	UID2024	-0.347068	-0.294933	0.22231	1.0684
Q60954-2	Meis1;Meis1;Meis1	GKMPIDLVIDDREGGSKSDSEDVTRSANLTD	_EGGS(ph)KSDSEDVTR_	3.64649	2.04127	NaN	3.61085	3.61085	Up	S	194	3	___1	0.964962	UID2025	1.52697	1.04551	#VALUE!	-1.66901
Q60954-2	Meis1;Meis1;Meis1	MPIDLVIDDREGGSKSDSEDVTRSANLTDQP	_EGGSKS(ph)DSEDVTR_	3.90072	2.44775	NaN	2.98802	2.98802	Up	S	196	2	___1	0.995207	UID2026	1.63524	1.25351	#VALUE!	-1.38964
H7BWZ9	Dopey1;Dopey1	DSSVPSETKSRQRSHSSIQFSFKEKLSEKVS	_SHS(ph)SIQFSFK_	-1.35625	-2.62509	-1.75165	-1.00207	-1.55395		S	1263	2	___1	0.998146	UID2027	-0.603599	-1.34223	0.792606	0.400101
H7BX08	Camsap2;Camsap2	TPPRSVDSLPRLRRFSPSQVPIQTRSFVCFG	_RFS(ph)PSQVPIQTR_	0.0307301	0.246428	-1.14747	0.303936	0.138579		S	1009	2	___1	0.999956	UID2029	-0.012912	0.127105	0.503349	-0.185704
H7BX08	Camsap2;Camsap2	PPEKADVSVEKLDGESDKEQFDDDQKVCCGF	_LDGES(ph)DKEQFDDDQK_	0.90787	-0.353341	0.185904	NaN	0.185904		S	1137	3	___1	1	UID2030	0.360645	-0.179792	-0.135015	#VALUE!
H7BX08	Camsap2;Camsap2	QDLSILNSNIKLNQSSPDNLTDTKGALSPIT	_LNQSS(ph)PDNLTDTK_	0.329591	1.1715	0.0801715	0.907223	0.618407		S	590	2	___1	0.999947	UID2032	0.114367	0.60046	-0.084395	-0.456306
H7BX08	Camsap2;Camsap2	SAQSSTPNRGIIRSVSNEGLTLNNSRASKHI	_SVS(ph)NEGLTLNNSR_	-1.91815	-1.19266	-1.53213	-0.76465	-1.3624		S	456	2	___1	0.998679	UID2033	-0.842905	-0.609266	0.687509	0.293606
Q6A065	Cep170;Cep170	YLKRLKGNKHDDGTQSDSENAGAHRRCSKRA	_HDDGTQS(ph)DSENAGAHR_	0.85013	-0.895356	-4.13578	-0.668496	-0.781926		S	378	2	___1	0.997516	UID2035	0.336055	-0.457138	1.93403	0.250476
Q6A065	Cep170;Cep170	PTRTSLLRRARLGEASDSELADADKASVASE	_LGEAS(ph)DSELADADK_	0.71657	-0.0552533	-0.0501663	0.164899	0.0573663		S	1102	2	___1	0.999985	UID2036	0.279174	-0.0272632	-0.0219947	-0.12334
Q6A065	Cep170;Cep170	RTAEAVIRSGARLVPSDKLSPRTRANSISRL	_LVPS(ph)DKLSPR_	0.0924071	-0.493454	-0.709619	-0.62686	-0.560157		S	1184	2	___1	0.999234	UID2037	0.013355	-0.251487	0.293724	0.231801
Q6A065	Cep170;Cep170	AVIRSGARLVPSDKLSPRTRANSISRLSDSK	_LVPSDKLS(ph)PR_	0.466062	-0.650886	-0.618527	-1.11346	-0.634707		S	1188	3	___1	0.999925	UID2038	0.172487	-0.332044	0.250113	0.450063
H7BX49	Wdr90;Wdr90	SDCSKVPDEQDEKSCSPPEAVFLGRMSRHLP	_SCS(ph)PPEAVFLGR_	0.161509	NaN	0.0277534	-0.799882	0.0277534		S	319	2	___1	0.963258	UID2040	0.0427844	NaN	-0.0592994	0.309409
H7BX95	Srsf1;Srsf1	EGETAYIRVKVDGPRSPSYGRSRSRSRSRSR	_VDGPRS(ph)PS(ph)YGR_	0.567915	1.32917	-0.0438567	0.868884	0.718399		S	199	2	___1	0.999995	UID2043	0.215865	0.681134	-0.0250155	-0.439109
H9KV00	Son;Son;Son;Son	SLPIKESAQAVAVALSPKESSEDTEVPLPNK	_ESAQAVAVALS(ph)PK_	-0.510481	-0.94215	-0.798992	-0.702384	-0.750688		S	1723	2	___1	1	UID2049	-0.243404	-0.481082	0.336512	0.265677
H9KV00	Son;Son;Son;Son	GIEGPLLASEVERDKSAASPVVISIPERASE	_S(ph)AASPVVISIPER_	-1.78366	-1.58392	NaN	0.329646	-1.58392		S	1791	2	___1	0.983293	UID2053	-0.785626	-0.809474	#VALUE!	-0.197236
H9KV00	Son;Son;Son;Son	GPLLASEVERDKSAASPVVISIPERASESSS	_SAAS(ph)PVVISIPER_	-1.90269	-1.59715	0.289347	-0.690054	-1.1436		S	1794	2	___1	0.999801	UID2054	-0.836321	-0.81624	-0.184539	0.260146
I1E4X8	Stim2;Stim2;Stim2	SPASRVYNGILEKSCSMHQLSSGIPVPHPRH	_SCS(ph)MHQLSSGIPVPHPR_	NaN	1.45116	0.960674	2.01997	1.45116		S	688	3	___1	0.892009	UID2060	NaN	0.743558	-0.505943	-0.955424
I1E4X8	Stim2;Stim2;Stim2	VSRGSPECVGLTETKSMIFSPASRVYNGILE	_S(ph)M(ox)IFSPASR_	1.19869	0.917545	0.191104	1.63201	1.05812		S	669	2	___1	0.999999	UID2061	0.484499	0.470511	-0.137505	-0.781405
I1E4X8	Stim2;Stim2;Stim2	DSKPVQEASNVSRVSSIPHDLCHNGEKSKKP	_VSS(ph)IPHDLCHNGEK_	1.68482	0.966563	1.44041	1.88901	1.56262		S	727	3	___1	0.998428	UID2063	0.691534	0.495593	-0.73562	-0.896684
Q549C9	Trp53;Tp53;Trp53	ELPPGSAKRALPTCTSASPPQKKKPLDGEYF	_ALPTCTS(ph)ASPPQK_	-7.85707	-7.47306	-6.24902	-7.28158	-7.37732	Down	S	310	2	___1	0.963399	UID2064	-3.37218	-3.8229	2.94576	3.21675
Q549C9	Trp53;Tp53;Trp53	PPGSAKRALPTCTSASPPQKKKPLDGEYFTL	_ALPTCTSAS(ph)PPQK_	-7.69566	-7.54442	-6.52641	-7.82438	-7.62004	Down	S	312	2	___1	0.99999	UID2065	-3.30344	-3.85942	3.07856	3.46022
I7HIP8	Nfib	PAAGSRTWHERDQDMSSPTTMKKPEKPLFSS	_DQDMS(ph)SPTTMK_	-1.02357	NaN	0	0.554921	0		S	310	2	___1	0.803486	UID2066	-0.461919	NaN	-0.0460122	-0.298282
I7HIP8	Nfib	AAGSRTWHERDQDMSSPTTMKKPEKPLFSST	_DQDM(ox)SS(ph)PTTMK_	-1.45194	0.759356	-0.0245706	0.755648	0.365539		S	311	2	___1	0.934481	UID2067	-0.644352	0.389567	-0.0342489	-0.388318
Q8VC51	Wrap53	DSLPPDLAPAPVPQGSPAEKNTDFEPVPPPC	_LLAPDSLPPDLAPAPVPQGS(ph)PAEK_	-0.903973	-0.443915	-0.336938	0.187012	-0.390427		S	27	2	___1	1	UID2068	-0.410984	-0.226139	0.1153	-0.133258
Q7JJ13	Brd2	TTPTPTAILAPGSPASPPGSLEPKAARLPPM	_KADTTTPTPTAILAPGS(ph)PAS(ph)PPGSLEPK_	-1.77183	-1.11068	-0.0544467	0.09404	-0.582563		S	300	3	___1	0.996879	UID2072	-0.780587	-0.567318	-0.0199455	-0.091556
J3KMN0	Mll2	PQLGSGRWEQDNRALSPVIPIIPRTGIPVFP	_ALS(ph)PVIPIIPR_	-0.0714914	0.236082	0.0662098	0.120814	0.0935119		S	4789	2	___1	1	UID2075	-0.0564462	0.121811	-0.0777107	-0.103565
J3KMN0	Mll2	GLRAQEPPPAQALAPSPPSHPDVFRSGPYPD	_AQEPPPAQALAPS(ph)PPSHPDVFR_	-0.0769207	0.0640686	0.436834	0.190153	0.127111		S	2318	3	___1	0.995106	UID2076	-0.0587585	0.033793	-0.25515	-0.134667
J3KMN0	Mll2	ESPGVAGGKASEPLLSPPPFGESRKSLEVKK	_ASEPLLS(ph)PPPFGESR_	-0.596745	0.383977	0.250625	-0.135068	0.0577785		S	2231	2	___1	1	UID2077	-0.280142	0.197488	-0.166001	0.0112093
J3KMN0	Mll2	FKAPLTPRASQVEPQSPGLGLRAQEPPPAQA	_ASQVEPQS(ph)PGLGLR_	NaN	-0.809173	0.800961	0.121678	0.121678		S	2299	2	___1	1	UID2078	NaN	-0.413038	-0.429479	-0.103953
J3KMN0	Mll2	LPEVKPKVEEGGRHPSPCQFTINTPKVEPAP	_HPS(ph)PCQFTINTPK_	-0.591238	-1.0285	0.0450095	-0.749921	-0.670579		S	3122	2	___1	0.999999	UID2080	-0.277796	-0.525268	-0.0675609	0.286999
J3KMN0	Mll2	PPSSPQEPKRPSQLPSPSAQLTPTHPGTPKP	_RPSQLPS(ph)PSAQLTPTHPGTPK_	-0.516863	0.507371	1.31077	0.233631	0.370501		S	4382	3	___1	0.916254	UID2082	-0.246122	0.260628	-0.673555	-0.154169
J3KMN0	Mll2	PKPQGPALELPPGRVSPAAAQLADTFFGKGL	_VS(ph)PAAAQLADTFFGK_	0.413048	0.449594	0.537357	0.388068	0.431321		S	4410	2	___1	1	UID2083	0.14991	0.231064	-0.303276	-0.223441
J3KMQ6		PSLQESLDGDEKELESSEEGGSAEERRLEPP	_ELES(ph)SEEGGSAEER_	1.45799	0.786985	0.971564	-0.136025	0.879274		S	18	2	___1	0.997296	UID2084	0.594931	0.403704	-0.511156	0.0116388
J3KMQ6		SLQESLDGDEKELESSEEGGSAEERRLEPPP	_ELESS(ph)EEGGSAEER_	1.35391	0.445988	1.60271	-0.175661	0.899949		S	19	2	___1	0.845289	UID2085	0.550605	0.229219	-0.813322	0.0294175
J3QM46	Ttc28	PPGSSHPSPGRDTPVSPADPPLFRLKYPSSP	_DTPVS(ph)PADPPLFR_	1.63517	2.12988	1.37357	3.12806	1.88253		S	2299	2	___1	0.999967	UID2086	0.670387	1.09085	-0.703619	-1.45245
J3QM46		PEPASARSRRRREPESPPAPIPLFGARTVVQ	_REPES(ph)PPAPIPLFGAR_	1.38361	0.145239	0.912114	1.45885	1.14786		S	24	3	___1	1	UID2088	0.563256	0.0753272	-0.482694	-0.703736
J3QM82	Phlpp2	EERARGAGFGIRRQNSVNSGILLPANRDKME	_QNS(ph)VNSGILLPANR_	0.417014	NaN	1.39183	0.918585	0.918585		S	1242	2	___1	0.999985	UID2091	0.151599	NaN	-0.712362	-0.461402
J3QM82	Phlpp2	ARGAGFGIRRQNSVNSGILLPANRDKMELQK	_RQNSVNS(ph)GILLPANR_	1.05122	NaN	1.71167	1.11672	1.11672		S	1245	3	___1	0.888312	UID2092	0.421695	NaN	-0.86549	-0.550275
Q91ZV8	Gpr124	SHVPARALPTATEDGSPVLGEGPASLKSSPS	_ALPTATEDGS(ph)PVLGEGPASLK_	0.697253	-3.19463	-0.562004	-0.576621	-0.569312		S	1104	2	___1	0.999986	UID2093	0.270947	-1.63366	0.223052	0.209266
J3QNB1	Larp1	RESPRPPAAAEAPAGSDGEDGGRRDFVEAPP	_ESPRPPAAAEAPAGS(ph)DGEDGGRR_	-2.15631	-2.61909	NaN	-2.2819	-2.2819	Down	S	81	3	___1	1	UID2094	-0.944332	-1.33916	#VALUE!	0.974162
J3QNB1	Larp1	TLDAKMPRKRKTRHSSNPPLESHVGWVMDSR	_HSS(ph)NPPLESHVGWVMDSR_	-1.59491	-3.85507	NaN	-3.68136	-3.68136		S	801	3	___1	0.98136	UID2096	-0.705241	-1.9716	#VALUE!	1.60189
J3QNB1	Larp1	ANKLFGAPEPSTIARSLPTTVPESPNYRNAR	_S(ph)LPTTVPES(ph)PNYR_	-2.38023	0.210574	-0.949799	-6.25418	-1.66501		S	743	2	___1	0.999924	UID2098	-1.0397	0.108759	0.408712	2.75591
J3QNB1	Larp1	EPSTIARSLPTTVPESPNYRNARTPRTPRTP	_SLPTTVPES(ph)PNYR_	-0.91896	-0.353596	-0.213136	-0.194201	-0.283366		S	751	2	___1	0.999972	UID2099	-0.417367	-0.179923	0.0560286	0.0377336
J3QNB1	Larp1	VEPAWHDQDETSSVKSDGAGGARASFRGRGR	_VEPAWHDQDETSSVKS(ph)DGAGGAR_	NaN	-2.50057	-1.31412	-1.9674	-1.9674		S	302	3	___1	0.999074	UID2101	NaN	-1.27851	0.583134	0.833093
J3QNK5	Sap130	IPPAVVATVSATRAQSPVITTTAAHAADSTL	_AQS(ph)PVITTTAAHAADSTLSR_	-0.230408	-0.00976535	0.521225	2.71455	0.25573		S	274	3	___1	0.999922	UID2103	-0.124126	-0.00398733	-0.295553	-1.26698
J3QNT7	Epn2;Epn2;Epn2	SKKPAESGASVPPQDSRTTSPDLFESQSLTS	_KPAESGASVPPQDS(ph)R_	2.56584	0.640896	2.91697	2.50314	2.53449	Up	S	439	2	___1	1	UID2105	1.06674	0.328951	-1.44254	-1.17215
J3QPS2		ILHDDRLASHFRGYESPTLSKDYEGYPASAI	_GYES(ph)PTLSK_	NaN	2.71688	3.85325	1.09171	2.71688		S	203	2	___1	0.965314	UID2106	NaN	1.39122	-1.89079	-0.539058
K3W4P2	Ints1	EEDSQTELLIAEEKLSPEQEGQLMPRPRYDE	_LS(ph)PEQEGQLM(ox)PR_	-0.37311	-0.207644	-0.743112	-1.06435	-0.558111		S	334	2	___1	1	UID2108	-0.1849	-0.10524	0.309758	0.428035
K3W4P2	Ints1	AGRMNRAKPTTVRRPSAAAKPSGHPPPGDFI	_RPS(ph)AAAKPSGHPPPGDFIALGSK_	NaN	-0.420335	-2.64596	-0.81645	-0.81645		S	40	4	___1	0.999265	UID2110	NaN	-0.214073	1.22076	0.316841
O08539	Bin1;Bin1	VKAQPSDNAPEKGNKSPSPPPDGSPAATPEI	_GNKS(ph)PS(ph)PPPDGSPAATPEIR_	0.332093	2.12776	-0.521719	3.22619	1.22993		S	296	2	___1	1	UID2111	0.115433	1.08977	0.203765	-1.49647
O08539	Bin1;Bin1	AQPSDNAPEKGNKSPSPPPDGSPAATPEIRV	_GNKS(ph)PS(ph)PPPDGSPAATPEIR_	1.0123	-0.0408665	-0.00136846	0.837121	0.417876		S	298	3	___1	0.999999	UID2112	0.405121	-0.0199016	-0.0453571	-0.424862
O08539	Bin1;Bin1	APEKGNKSPSPPPDGSPAATPEIRVNHEPEP	_SPS(ph)PPPDGS(ph)PAATPEIR_	1.28758	-0.799017	0.752012	1.14344	0.947726		S	304	2	___1	0.999993	UID2113	0.522357	-0.407842	-0.406044	-0.562261
O08539	Bin1;Bin1	AATPEIRVNHEPEPASGASPGATIPKSPSQL	_VNHEPEPAS(ph)GASPGATIPK_	0.535383	2.57797	NaN	2.60655	2.57797		S	321	2	___1	0.894561	UID2114	0.20201	1.32014	#VALUE!	-1.21853
O08539	Bin1;Bin1	PEIRVNHEPEPASGASPGATIPKSPSQLRKG	_VNHEPEPASGAS(ph)PGATIPK_	0.347381	2.69974	-0.0854512	3.11094	1.52356		S	324	2	___1	0.999993	UID2115	0.121944	1.38245	-0.00510178	-1.44477
O08539	Bin1;Bin1	PEPASGASPGATIPKSPSQLRKGPPVPPPPK	_VNHEPEPASGASPGATIPKS(ph)PSQLR_	0.860848	-0.0158221	0.0994345	0.221984	0.160709		S	332	3	___1	0.979665	UID2116	0.340619	-0.00708655	-0.0936173	-0.148945
O08539	Bin1;Bin1	PASGASPGATIPKSPSQLRKGPPVPPPPKHT	_VNHEPEPASGASPGATIPKSPS(ph)QLR_	0.791935	-0.831901	NaN	-0.170615	-0.170615		S	334	4	___1	0.86984	UID2117	0.311271	-0.424668	#VALUE!	0.0271541
O08547	Sec22b;Sec22b	TKKLYIDSRARRNLGSINTELQDVQRIMVAN	_NLGS(ph)INTELQDVQR_	-7.89276	-3.71338	-7.54447	-1.80617	-5.62892	Down	S	137	2	___1	1	UID2118	-3.38737	-1.8991	3.56596	0.760774
O08582	Gtpbp1	KAVGTITKLLQTTNNSPMNSKPQQIKMQSTK	_LLQTTNNS(ph)PMNSKPQQIK_	0.262909	-0.115219	-0.0055016	-0.119391	-0.0603603		S	580	3	___1	0.999867	UID2119	0.0859685	-0.0579472	-0.0433783	0.00417774
O08582	Gtpbp1	PVDSPVPASMFAPEPSSPGAARAAAAAARLH	_S(ph)RSPVDSPVPASMFAPEPS(ph)SPGAAR_	NaN	2.8641	2.31274	0.410452	2.31274		S	24	3	___1	0.974561	UID2122	NaN	1.46655	-1.15325	-0.233481
O08599	Stxbp1	LDTLKKLNKTDEEISS_______________	_LNKTDEEISS(ph)_	4.26797	NaN	3.25078	2.65048	3.25078	Up	S	594	2	___1	0.816307	UID2126	1.79165	NaN	-1.60235	-1.23824
O08648	Map3k4	ALMNECIGHVIGKPHSPVTAIHRNSPRPVKV	_PHS(ph)PVTAIHR_	0.561784	-0.360344	-1.78779	-0.130916	-0.24563		S	1126	3	___1	0.999993	UID2129	0.213254	-0.183376	0.809908	0.0093472
O08715-4	Akap1	VETLKVGPAIKDRRLSEEACPGVLSVAPTVT	_RLS(ph)EEACPGVLSVAPTVTQPPGR_	1.50322	1.39503	1.22249	0.856262	1.30876		S	88	2	___1	1	UID2130	0.614192	0.714839	-0.631287	-0.433448
O08715-4	Akap1	TEPLALPRTRQVRRRSESSGNLPSVADTRSQ	_RRS(ph)ESSGNLPSVADTR_	NaN	1.89623	0.694233	0.495514	0.694233		S	134	3	___1	0.941069	UID2132	NaN	0.971295	-0.378382	-0.271635
O08715-4	Akap1	PLALPRTRQVRRRSESSGNLPSVADTRSQPG	_RSES(ph)SGNLPSVADTR_	5.08699	2.02277	5.3782	1.74114	3.55488	Up	S	136	2	___1	0.999168	UID2133	2.14045	1.03605	-2.62087	-0.830357
O08715-4	Akap1	LALPRTRQVRRRSESSGNLPSVADTRSQPGP	_SESS(ph)GNLPSVADTR_	3.51587	1.75543	NaN	1.25644	1.75543		S	137	2	___1	0.78017	UID2134	1.47134	0.899253	#VALUE!	-0.612946
O08750	Nfil3	SDGEDEQQVPKGPIHSPVELQRVHATVVKVP	_GPIHS(ph)PVELQR_	-2.20708	-3.86215	-2.72822	-2.93395	-2.83108	Down	S	301	3	___1	1	UID2138	-0.965953	-1.97523	1.26015	1.26664
O08750	Nfil3	PLLQVHGSTSNSPRTSEADEGVVGKSSDGED	_TS(ph)EADEGVVGK_	-1.69058	-2.61389	-3.11109	-2.27862	-2.44625	Down	S	275	2	___1	0.987275	UID2139	-0.745987	-1.3365	1.44345	0.972693
O08856	Ell	MLMRKLCQPQNATTDSSPPREHGRSASPSQK	_KLCQPQNATTDS(ph)SPPR_	NaN	-0.150453	2.02024	0.858435	0.858435		S	299	2	___1	0.815667	UID2141	NaN	-0.0759761	-1.01322	-0.434422
O08856	Ell	LMRKLCQPQNATTDSSPPREHGRSASPSQKR	_LCQPQNATTDSS(ph)PPR_	-0.54061	-0.360279	0.392034	-0.110077	-0.235178		S	300	2	___1	0.999965	UID2142	-0.256235	-0.183343	-0.233702	0
O08919	Numbl	AAPAVAPGPAQPGHVSPTPATTSPGEKGEAG	_KAEAAAAPAVAPGPAQPGHVS(ph)PTPATTSPGEK_	-0.360964	-0.600027	0.573718	1.26575	0.106377		S	263	3	___1	0.980592	UID2143	-0.179727	-0.30602	-0.320684	-0.617122
Q9D3L3	Snap23;Snap23;Snap23	SGKNYKATWGDGGDNSPSNVVSKQPSRITNG	_ATWGDGGDNS(ph)PSNVVSK_	-0.49029	0.890557	-0.600484	0.567682	0.038696		S	121	2	___1	0.999999	UID2145	-0.234805	0.456701	0.241474	-0.304006
O09174	Amacr	NRERASFITDGEQLPSPRPAPLLSRTPAVPS	_ASFITDGEQLPS(ph)PR_	-3.29707	-1.08602	-2.45888	-2.10816	-2.28352	Down	S	323	2	___1	1	UID2148	-1.43016	-0.554697	1.13119	0.896233
O35130	Emg1	MSAASGGFQPRERRFSVQEQDWETTPPKKLR	_RFS(ph)VQEQDWETTPPKK_	0.214046	-0.544391	0.335763	-0.591055	-0.165172		S	16	3	___1	1	UID2155	0.0651587	-0.277552	-0.206762	0.215741
O35245	Pkd2	SGRRRRLEDQGAQCPSPAGGGDPLHRHLPLE	_LEDQGAQCPS(ph)PAGGGDPLHR_	0.532732	NaN	2.17806	1.07335	1.07335		S	164	3	___1	1	UID2157	0.200881	NaN	-1.08878	-0.530823
O35295	Purb	KLYERRGGGSGGGDESEGEEVDED_______	_RGGGSGGGDES(ph)EGEEVDED_	1.03143	0.330111	0.491378	0.681532	0.586455		S	316	2	___1	0.999998	UID2158	0.413269	0.169925	-0.281263	-0.355073
O35316	Slc6a6	KLQCLKDFHKDILKPSPGKSPGTRPEDEADG	_DILKPS(ph)PGK_	0.780997	-0.286529	1.20309	NaN	0.780997		S	21	2	___1	1	UID2159	0.306612	-0.145605	-0.621999	#VALUE!
O35343	Kpna4;Kpna4	LLKRRNVPQEDICEDSDIDGDYRVQNTSLEA	_NVPQEDICEDS(ph)DIDGDYR_	NaN	1.16946	0.777313	0.808963	0.808963		S	60	2	___1	1	UID2160	NaN	0.599413	-0.418157	-0.412232
O35344	Kpna3	LLKKRNVPQEESLEDSDVDADFKAQNVTLEA	_NVPQEESLEDS(ph)DVDADFK_	2.424	1.43698	0.802138	0.711165	1.11956		S	60	2	___1	1	UID2161	1.00633	0.736302	-0.430042	-0.368365
O35382	Exoc4;Exoc4;Exoc4	RNKEKGKMSSHGKDPSPGPLIDVSNIPTPRK	_DPS(ph)PGPLIDVSNIPTPR_	-0.861141	-0.462643	-2.19282	0.527981	-0.661892		S	226	2	___1	1	UID2162	-0.392743	-0.235722	1.00382	-0.286199
O35492	Clk3	SASSRSQQSSKRSSRSVEDDKEGHLVCRIGD	_S(ph)VEDDKEGHLVCR_	-0.786409	-1.33942	-1.22615	-0.175346	-1.00628		S	283	2	___1	1	UID2164	-0.360916	-0.684364	0.541019	0.0292761
O35495	Cdk14;Cdk14;Cdk14;Cdk14;Cdk14	DTIPEDKKVRVQRTQSTFDPFEKPANQVKRV	_TQS(ph)TFDPFEKPANQVK_	2.6714	1.57148	2.4432	-0.144946	2.00734		S	78	3	___1	0.987031	UID2165	1.1117	0.805127	-1.21571	0.0156403
O35495	Cdk14;Cdk14;Cdk14;Cdk14;Cdk14	FDPFEKPANQVKRVHSENNACINFKSSSAGK	_VHS(ph)ENNACINFK_	2.41183	-0.578983	1.64317	-1.08674	0.532093		S	95	2	___1	1	UID2166	1.00115	-0.295252	-0.832694	0.43808
O35551-6	Rabep1	KSDNDMFKDGLRRAQSTDSLGTSSSLQSKAL	_AQS(ph)TDSLGTSSSLQSK_	0.189674	0.836839	2.04074	2.35816	1.43879		S	407	2	___1	0.993882	UID2167	0.054779	0.429214	-1.02304	-1.10712
O35623	Bet1	LTESLRSKVTAIKSLSIEIGHEVKNQNKLLA	_SLS(ph)IEIGHEVK_	NaN	-0.00871956	-1.22657	-1.96234	-1.22657		S	50	2	___1	0.99999	UID2170	NaN	-0.00345221	0.541217	0.830823
O35664	Ifnar2	AGPSEDPTGPYERRKSVLEDSFPREDNSSMD	_S(ph)VLEDSFPR_	1.89367	0.965563	0.300257	-10.4741	0.63291		S	403	2	___1	1	UID2171	0.780478	0.495081	-0.189763	4.64875
Q3TUQ5	Pnn;Pnn	EEAGEEEEKEAGIVHSDAEKEQEEEEQKQEM	_EAGIVHS(ph)DAEK_	-0.353988	-0.715904	-0.594871	-0.919865	-0.655388		S	347	2	___1	1	UID2172	-0.176756	-0.365314	0.238787	0.363227
Q3TUQ5	Pnn;Pnn	GGGRGRGSLLLRRGFSDSGGGPPAKQRDLEG	_GFS(ph)DSGGGPPAK_	-2.41932	-3.36716	-2.58603	-2.17266	-2.50267	Down	S	66	2	___1	0.999971	UID2173	-1.05634	-1.72194	1.19207	0.925164
Q3TUQ5	Pnn;Pnn	RLGGERRTRRESRQESDPEDDDVKKPALQSS	_QES(ph)DPEDDDVK_	-0.246654	-0.437294	-0.877898	-0.899799	-0.657596		S	100	2	___1	1	UID2174	-0.131045	-0.222751	0.374288	0.354226
Q3TUQ5	Pnn;Pnn	EPEMEFDVEPDKECKSLSPGKENINSQEVEK	_S(ph)LS(ph)PGKENINSQEVEK_	-0.827376	-0.90703	-0.811139	-0.702117	-0.819257		S	441	2	___1	1	UID2175	-0.378363	-0.463112	0.342327	0.265557
Q3TUQ5	Pnn;Pnn	EMEFDVEPDKECKSLSPGKENINSQEVEKES	_S(ph)LS(ph)PGKENINSQEVEK_	-0.673798	-1.073	-0.859242	-0.778267	-0.818755		S	443	2	___1	1	UID2176	-0.312957	-0.548037	0.365357	0.299714
Q8C2Q7	Hnrnph1;Hnrnph1;Hnrnph2	NNVEMDWVLKHTGPNSPDTANDGFVRLRGLP;NSVEMDWVLKHTGPNSPDTANDGFVRLRGLP	_HTGPNS(ph)PDTANDGFVR_	-2.13869	-1.94968	-2.63249	-1.68075	-2.04419		S	104	2	___1	1	UID2178	-0.936828	-0.996628	1.21431	0.704518
O35929	Rem1;Rem1	CTAPSAPSQHPRLGQSVSLNPPVRKPSPAQD	_LGQS(ph)VSLNPPVR_	-2.18689	-6.17952	-1.88121	-1.00061	-2.03405		S	49	2	___1	0.987914	UID2179	-0.957356	-3.16101	0.854634	0.399445
O35929	Rem1;Rem1	APSAPSQHPRLGQSVSLNPPVRKPSPAQDGW	_LGQSVS(ph)LNPPVR_	-2.09303	-7.68749	-2.25175	-6.25027	-4.25101	Down	S	51	2	___1	0.999996	UID2180	-0.917379	-3.93263	1.03203	2.75416
O35945	Aldh1a7	_____________MSSPAQPAVPAPLANLKI	_(ac)SS(ph)PAQPAVPAPLANLK_	NaN	-4.1735	-5.26429	-5.81141	-5.26429	Down	S	3	2	___1	0.817465	UID2181	NaN	-2.13454	2.47431	2.55731
O35954	Pitpnm1	VRDPLADGVEVLGRASPEPSALPAQRTFSDM	_AS(ph)PEPSALPAQR_	-0.465111	-1.45069	-0.687908	-1.1231	-0.905504		S	621	2	___1	1	UID2182	-0.224081	-0.7413	0.283329	0.454387
O35984	Pbx2;Pbx2	IYAVKTAVSVAQGGHSRTSSPTPPSSAGSGG	_TAVSVAQGGHS(ph)R_	NaN	1.16927	-0.609138	-0.259952	-0.259952		S	330	2	___1	1	UID2184	NaN	0.599318	0.245617	0.0672258
O54692	Zw10	VKIGPDCKEALPDLPSPDADHKLQVQTVCKA	_EALPDLPS(ph)PDADHK_	-0.933422	-0.419975	-2.46588	0.670977	-0.676698		S	438	3	___1	1	UID2185	-0.423526	-0.213889	1.13455	-0.350339
O54724	Ptrf	TQGEARATEEPSGTGSDELIKSDQVNGVLVL	_ATEEPSGTGS(ph)DELIK_	1.17658	1.27985	0.709391	0.723187	0.949883		S	42	2	___1	0.999998	UID2187	0.475085	0.655901	-0.385639	-0.373757
O54724	Ptrf	ERREKLKTSRDKLRKSFTPDHVVYARSKTAV	_S(ph)FTPDHVVYAR_	-0.531842	1.78625	-0.469995	0.64106	0.0855325		S	302	2	___1	0.999999	UID2188	-0.252501	0.915024	0.179001	-0.33692
O54724	Ptrf	KVMIYQDEVKLPAKLSVSKSLKESEALPEKE	_LPAKLS(ph)VSK_	1.02762	2.70103	-0.132053	0.910402	0.969011		S	169	2	___1	0.999915	UID2189	0.411643	1.38311	0.0172093	-0.457732
O54724	Ptrf	LHIVERPYSGFPDASSEGPEPTQGEARATEE	_PYSGFPDASS(ph)EGPEPTQGEAR_	1.55918	1.26442	1.64661	0.705647	1.4118		S	21	2	___1	0.997247	UID2191	0.638027	0.648005	-0.834339	-0.36589
O54774	Ap3d1	KKEKGKRRHSSLPTESDEDIAPAQRVDIITE	_HSS(ph)LPT(ph)ES(ph)DEDIAPAQR_	1.20739	2.56348	1.9574	2.91816	2.26044		S	760	2	___1	1	UID2193	0.488206	1.31272	-0.983133	-1.35831
O54774	Ap3d1	EKLPVQKHRNAEAVKSPEKEGVLGVEKKSKK	_NAEAVKS(ph)PEKEGVLGVEK_	0.889617	0.645605	0.455268	0.0629695	0.550436		S	825	3	___1	1	UID2194	0.352871	0.331361	-0.263975	-0.0776194
O54918	Bcl2l11	GPLAPPASPGPFATRSPLFIFVRRSSLLSRS	_S(ph)PLFIFVR_	-3.10473	0.517239	-3.54335	-1.10096	-2.10284		S	73	2	___1	1	UID2201	-1.34824	0.265677	1.6504	0.444455
O54940	Bnip2;Bnip2;Bnip2	DDLPKPKTTEVIRKGSITEYTATEEKGDGRR	_KGS(ph)ITEYTATEEK_	0.440719	-0.100903	-0.17903	1.43843	0.169908		S	114	2	___1	0.999997	UID2202	0.161694	-0.0506219	0.0396999	-0.694578
O55022	Pgrmc1	HVGKLLKEGEEPTVYSDDEEPKDETARKNE_	_EGEEPTVYS(ph)DDEEPKDETAR_	0.714615	-0.0720832	0.77132	0.746316	0.730465		S	181	2	___1	0.999999	UID2203	0.278342	-0.0358749	-0.415288	-0.384132
O55028	Bckdk;Bckdk	SLWPLLGSSLSLRARSTSATDTHHVELARER	_S(ph)TSATDTHHVELAR_	3.29412	1.42901	NaN	1.87789	1.87789		S	31	2	___1	0.989989	UID2204	1.3769	0.732226	#VALUE!	-0.891696
O55029	Copb2	PSRPTAQQEPDGKPASSPVIMASQTTHKEEK	_GFQPSRPTAQQEPDGKPAS(ph)SPVIM(ox)ASQTTHK_	NaN	1.22419	1.61544	2.09621	1.61544		S	859	4	___1	0.772384	UID2205	NaN	0.62742	-0.819419	-0.989621
O55029	Copb2	SRPTAQQEPDGKPASSPVIMASQTTHKEEKS	_GFQPSRPTAQQEPDGKPASS(ph)PVIMASQTTHK_	NaN	1.3467	1.97832	1.92599	1.92599		S	860	4	___1	0.758537	UID2206	NaN	0.690104	-0.993149	-0.913271
O55143	Atp2a2	TSKAFTGREFDELSPSAQRDACLNARCFARV	_EFDELSPS(ph)AQR_	0.919984	-0.104731	0.285172	0.069425	0.177298		S	663	2	___1	0.999824	UID2208	0.365804	-0.0525807	-0.18254	-0.080515
O55201	Supt5h	PRDVTNLTVGGFTPMSPRISSPMHPSAEGQH	_DVTNLTVGGFT(ph)PMS(ph)PR_	-0.0259331	-0.154319	-0.282479	-0.213259	-0.183789		S	664	2	___1	1	UID2209	-0.0370438	-0.0779545	0.0892269	0.0462816
O70251	Eef1b	GAADAKDDDDIDLFGSDDEEESEEAKKLREE	_DDDDIDLFGS(ph)DDEEESEEAK_	0.0610485	0.0846498	0.237535	-0.208583	0.0728492		S	106	2	___1	1	UID2210	0	0.0443242	-0.159734	0.0441843
O70251	Eef1b	ASLPGVKKSLGKYGPSSVEDTTGSGAADAKD	_YGPS(ph)SVEDTTGSGAADAK_	-0.601191	-1.77432	NaN	-1.29828	-1.29828		S	82	2	___1	0.822928	UID2212	-0.282035	-0.9069	#VALUE!	0.532965
O70251	Eef1b	SLPGVKKSLGKYGPSSVEDTTGSGAADAKDD	_YGPSS(ph)VEDTTGSGAADAK_	-0.867641	-1.33015	-1.10444	-1.56909	-1.2173		S	83	2	___1	0.988022	UID2213	-0.395511	-0.679619	0.482745	0.654436
O70293-2	Grk5;Grk6;Grk6	PQAIYCKDVLDIEQFSTVKGVDLEPTDQDFY	_DVLDIEQFS(ph)TVK_	1.73975	0.717072	1.83386	0.311994	1.22841		S	484	2	___1	0.998819	UID2214	0.714927	0.36793	-0.923988	-0.189318
O70310	Nmt1	AKKKKKKQKKKKEKGSDMESTQDQPVKMTSL	_EKGS(ph)DMESTQDQPVK_	0.303201	-0.546887	NaN	-0.851889	-0.546887		S	69	2	___1	0.999495	UID2215	0.103128	-0.278829	#VALUE!	0.332737
O70310	Nmt1	HCSDCENEEDNSHNRSGLSPANDTGAKKKKK	_S(ph)GLSPANDTGAK_	-0.574809	NaN	-0.250299	0.0446594	-0.250299		S	44	2	___1	0.999577	UID2216	-0.2708	NaN	0.0738202	-0.0694065
O70310	Nmt1	DCENEEDNSHNRSGLSPANDTGAKKKKKKQK	_SGLS(ph)PANDTGAK_	-0.397147	-0.206461	-0.279362	0.0965086	-0.242912		S	47	2	___1	0.999785	UID2217	-0.195137	-0.104635	0.0877344	-0.0926633
O70318	Epb41l2	SKEKAKEVENEQTPVSEPEEEKGSQPGPPVE	_EVENEQTPVS(ph)EPEEEK_	0.877127	1.00805	0.394019	1.33109	0.942588		S	38	2	___1	1	UID2218	0.347552	0.516822	-0.234652	-0.646428
O70318	Epb41l2	LEEKVSELHKTHRGLSPAQADSQFLENAKRL	_GLS(ph)PAQADSQFLENAK_	1.89347	2.48522	1.56503	-0.285941	1.72925		S	379	2	___1	1	UID2219	0.780394	1.27268	-0.795283	0.0788831
O70318	Epb41l2	EDLDKAQEAILKHQASISELKRNFMASTPEP	_HQAS(ph)ISELKR_	3.79021	1.38471	4.12887	NaN	3.79021		S	630	3	___1	0.999824	UID2220	1.58818	0.709555	-2.02274	#VALUE!
O70318	Epb41l2	LWKVCVEHHTFYRLVSPEQPPKTKFLTLGSK	_LVS(ph)PEQPPK_	2.82434	0.729063	0.574734	-1.0011	0.651898		S	492	2	___1	1	UID2221	1.17683	0.374066	-0.321171	0.399663
O70318	Epb41l2	RGISRFIPPWLKKQRSYNLVVAKDGGDKKEP	_S(ph)YNLVVAK_	3.49184	2.91285	2.53537	1.9623	2.72411	Up	S	86	2	___1	1	UID2222	1.46111	1.49149	-1.25984	-0.929556
O70318	Epb41l2	PAQADSQFLENAKRLSMYGVDLHHAKDSEGV	_RLS(ph)M(ox)YGVDLHHAK_	2.76066	0.286672	1.71662	-1.25689	1.00165		S	395	4	___1	0.999815	UID2223	1.14971	0.147697	-0.867858	0.5144
O70400	Pdlim1	DNMTLTVSRSEQKIWSPLVTEEGKRHPYKMN	_IWS(ph)PLVTEEGKR_	-3.94796	-1.20529	-2.4778	NaN	-2.4778		S	90	3	___1	1	UID2226	-1.70736	-0.615729	1.14026	#VALUE!
O70405	Ulk1	PTQVHNYQRIEQNLQSPTQQQTARSSAIRRS	_IEQNLQS(ph)PTQQQTAR_	1.15384	-0.728791	1.57063	-0.78766	0.212525		S	450	2	___1	0.999698	UID2227	0.4654	-0.371908	-0.797965	0.303927
O70405	Ulk1	LPDFLQRSPLPPILGSPTKAGPSFDFPKTPS	_SPLPPILGS(ph)PTK_	0.238887	0.528006	0.815811	1.94598	0.671909		S	622	2	___1	0.998693	UID2228	0.075738	0.271187	-0.436588	-0.922238
O70405	Ulk1	SPTKAGPSFDFPKTPSSQNLLTLLARQGVVM	_TPS(ph)SQNLLTLLAR_	0.510555	0.729715	0.275782	2.00286	0.620135		S	637	2	___1	0.999667	UID2229	0.191436	0.3744	-0.178045	-0.947751
O70435	Psma3	EAEKYAKESLKEEDESDDDNM__________	_ESLKEEDES(ph)DDDNM_	0.0568792	-0.42184	-0.190442	-0.325588	-0.258015		S	250	2	___1	1	UID2232	-0.00177561	-0.214843	0.0451634	0.0966667
O70472	Tmem131	YNPWRIWSPTVGRRSSDPWSNSHFPHEN___	_RSS(ph)DPWSNSHFPHEN_	-1.51613	0.354814	-1.30425	1.44594	-0.474718		S	1865	3	___1	0.996505	UID2233	-0.671692	0.182565	0.578407	-0.697944
O70480	Vamp4;Vamp4	PPKFKRHLNDDDVTGSVKSERRNLLEDDSDE	_HLNDDDVTGS(ph)VK_	4.9012	3.37149	5.57524	2.17548	4.13635	Up	S	17	2	___1	0.999618	UID2235	2.06133	1.72618	-2.7152	-1.02518
O70481	Ubr1	_MADEEMDGAERMDVSPEPPLAPQRPASWWD	_M(ox)DVS(ph)PEPPLAPQR_	-0.27942	-0.514983	0.0343859	-0.0544378	-0.166929		S	15	2	___1	1	UID2236	-0.144999	-0.262504	-0.0624747	-0.0249568
O70551	Srpk1	QDITQLEESIRADTPSGDEQEPNGALDSKGK	_ADT(ph)PS(ph)GDEQEPNGALDSK_	-0.866215	0.361018	-0.294071	-0.831649	-0.56286		S	450	2	___1	1	UID2237	-0.394904	0.18574	0.0947764	0.323658
O70551	Srpk1	NPPNKMTQEKLEESNSIGQDQTLTERGGEGG	_LEESNS(ph)IGQDQTLTER_	0.14932	-1.09655	NaN	-1.75315	-1.09655		S	335	2	___1	0.997668	UID2238	0.037593	-0.56009	#VALUE!	0.736995
O70551	Srpk1	KESGPGQKRPNKQEESESPVDRPLTENPPNK	_QEES(ph)ES(ph)PVDRPLTENPPNK_	-0.547861	-0.747974	NaN	-1.26499	-0.747974		S	309	3	___1	0.99999	UID2239	-0.259323	-0.381724	#VALUE!	0.518031
O70551	Srpk1	SGPGQKRPNKQEESESPVDRPLTENPPNKMT	_QEES(ph)ES(ph)PVDRPLTENPPNK_	-0.77516	-0.570485	-0.85245	-1.00183	-0.813805		S	311	3	___1	0.999966	UID2240	-0.356125	-0.290903	0.362105	0.399991
O88271	Cfdp1	FLKQTEREKPQALVTSPATPLPAGSGIKRAS	_EKPQALVTS(ph)PATPLPAGSGIK_	-1.23049	0.936203	0.203328	0.641669	0.422498		S	203	3	___1	0.96254	UID2242	-0.550042	0.480058	-0.143357	-0.337193
O88273	Grem2	NNSERWHHQIKEVLASSQEALVVTERKYLKS	_EVLAS(ph)SQEALVVTER_	2.6939	6.19992	1.71772	3.27364	2.98377	Up	S	55	2	___1	0.997961	UID2243	1.12128	3.17346	-0.868384	-1.51775
O88273	Grem2	NSERWHHQIKEVLASSQEALVVTERKYLKSD	_EVLASS(ph)QEALVVTER_	2.77225	3.91057	1.66174	3.0833	2.92778	Up	S	56	2	___1	0.963126	UID2244	1.15465	2.00202	-0.841585	-1.43238
O88343	Slc4a4;Slc4a4	QQPFLSDNKPLDRERSSTFLERHTSC_____	_ERS(ph)STFLER_	4.49612	3.00469	2.75878	5.05862	3.75041	Up	S	1069	2	___1	0.999684	UID2245	1.88881	1.53849	-1.3668	-2.3184
O88343	Slc4a4;Slc4a4	TVSSASRMFSNPDNGSPAMTHRNLTSSSLND	_MFSNPDNGS(ph)PAMTHR_	7.03916	NaN	5.79947	5.07986	5.79947	Up	S	245	2	___1	0.999999	UID2248	2.97185	NaN	-2.82255	-2.32793
O88343	Slc4a4;Slc4a4;Slc4a4;Slc4a4	NPDNGSPAMTHRNLTSSSLNDISDKPEKDQL	_NLTS(ph)SSLNDISDKPEK_	5.68309	3.69921	4.79368	4.11258	4.45313	Up	S	255	2	___1	0.993022	UID2249	2.39432	1.89387	-2.34103	-1.89405
O88343	Slc4a4;Slc4a4;Slc4a4;Slc4a4	PDNGSPAMTHRNLTSSSLNDISDKPEKDQLK	_NLTSS(ph)SLNDISDKPEK_	5.74762	3.21692	5.27364	NaN	5.27364	Up	S	256	2	___1	0.841828	UID2250	2.4218	1.64708	-2.57081	#VALUE!
O88343	Slc4a4;Slc4a4;Slc4a4;Slc4a4	DNGSPAMTHRNLTSSSLNDISDKPEKDQLKN	_NLTSSS(ph)LNDISDKPEK_	NaN	3.86286	4.84015	4.32557	4.32557	Up	S	257	2	___1	0.976549	UID2251	NaN	1.97761	-2.36327	-1.98959
O88343	Slc4a4;Slc4a4;Slc4a4;Slc4a4	AMTHRNLTSSSLNDISDKPEKDQLKNKFMKK	_NLTSSSLNDIS(ph)DKPEK_	NaN	3.86172	5.41813	4.37163	4.37163	Up	S	262	3	___1	0.995145	UID2252	NaN	1.97702	-2.63998	-2.01025
O88413	Tulp3	QPNPEARLRRLKPRGSEEHTPLVDPQMPRSD	_GS(ph)EEHTPLVDPQMPR_	-3.0371	2.09846	-2.74666	0.590236	-1.07821		S	65	2	___1	0.998687	UID2254	-1.31944	1.07478	1.26897	-0.314123
O88413	Tulp3	PRNEHESLLSKWQNKSMENLIELHNKAPVWN	_S(ph)M(ox)ENLIELHNK_	1.55635	1.04894	1.4237	0.969966	1.23632		S	372	2	___1	1	UID2255	0.636822	0.537743	-0.727618	-0.484449
O88466	Zfp106;Zfp106;Zfp106	EQGNSRSKGNSPSCQSPDLPGINRGEETAKG	_GNSPSCQS(ph)PDLPGINR_	-1.00245	-1.52278	-0.489099	-0.871494	-0.936972		S	1296	2	___1	0.999938	UID2261	-0.452925	-0.778185	0.188148	0.34153
O88477	Igf2bp1	GRRGGFGSRGQPRQGSPVAAGAPAKQQPVDI	_QGS(ph)PVAAGAPAK_	-11.1736	-6.97243	-11.3207	-8.57084	-9.87222	Down	S	181	2	___1	1	UID2262	-4.78464	-3.56673	5.37386	3.79504
O88502	Pde8a	TDLVGGLMSDGLRRFSGNEYILATKNLPPLS	_RFS(ph)GNEYILATK_	0.768374	1.07003	1.41135	2.05793	1.24069		S	452	2	___1	1	UID2263	0.301236	0.548535	-0.721706	-0.97245
O88502	Pde8a	DVDVPGPAPRSIQRWSTAPGLVEPQPRDNGA	_WS(ph)TAPGLVEPQPR_	-2.17291	NaN	-2.51138	0.331417	-2.17291		S	41	2	___1	0.975317	UID2264	-0.951401	NaN	1.15633	-0.19803
O88532	Zfr	NQRFNIHNNRKRRRDSDGVDGFEAEGKKDKK	_RRDS(ph)DGVDGFEAEGK_	-0.163547	-0.142322	-0.201229	-0.228795	-0.182388		S	1054	3	___1	1	UID2265	-0.0956507	-0.0718155	0.0503276	0.0532505
O88569	Hnrnpa2b1	QSSRSGRGGNFGFGDSRGGGGNFGPGPGSNF	_GGNFGFGDS(ph)R_	-0.0415052	0.5245	-0.616246	0.22623	0.0923624		S	212	2	___1	1	UID2266	-0.0436757	0.269392	0.249021	-0.150849
O88572	Lrp6;Lrp6	STKGTYFPAILNPPPSPATERSHYTMEFGYS	_GTYFPAILNPPPS(ph)PATER_	4.18095	3.93907	NaN	4.00848	4.00848	Up	S	1490	2	___1	0.999818	UID2267	1.75459	2.0166	#VALUE!	-1.84736
O88587	Comt	KVVDGLEKAVYQGPGSSPVKS__________	_AVYQGPGS(ph)SPVKS_	-0.594278	0.151921	-0.676745	-0.554847	-0.574562		S	260	2	___1	0.972639	UID2268	-0.279091	0.0787465	0.277985	0.1995
O88587	Comt	VVDGLEKAVYQGPGSSPVKS___________	_AVYQGPGSS(ph)PVK_	-0.0182955	0.203243	0.0569701	-0.244566	0.0193373		S	261	2	___1	0.999604	UID2269	-0.0337911	0.105008	-0.0732871	0.0603242
O88665	Brd7	QSGEDSGCWQREREDSGDAETQAFRSPAKDN	_EREDS(ph)GDAETQAFR_	1.52747	-0.184869	0.408805	0.359804	0.384304		S	279	3	___1	1	UID2270	0.624522	-0.0935865	-0.241731	-0.210763
O88685	Psmc3;Psmc3;Psmc3	____MQEMNLLPTPESPVTRQEKMATVWDEA	_(ac)M(ox)QEMNLLPTPES(ph)PVTR_	-1.65869	-1.08954	-1.54855	-1.21314	-1.38085		S	12	2	___1	0.999993	UID2271	-0.732404	-0.556499	0.69537	0.494774
Q3UDC3	Tom1;Tom1	ERAKAADRLPNLASPSAEGPPRPSPGTAPRR	_LPNLASPS(ph)AEGPPRPSPGTAPR_	0.333656	1.82487	-1.8075	0.523513	0.428585		S	488	3	___1	0.987712	UID2273	0.116098	0.934781	0.819341	-0.284194
Q3UDC3	Tom1;Tom1	LPNLASPSAEGPPRPSPGTAPRRKTQEKDDD	_LPNLASPSAEGPPRPS(ph)PGTAPR_	2.47654	1.79044	0.924308	2.4071	2.09877		S	496	3	___1	0.984152	UID2274	1.02871	0.917164	-0.488532	-1.12907
O88792	F11r	KKGTAPGKKVIYSQPSTRSEGEFKQTSSFLV	_VIYSQPS(ph)T(ph)RSEGEFK_	-3.46014	-3.68108	-4.01929	-2.65613	-3.57061	Down	S	285	3	___1	0.966904	UID2275	-1.49961	-1.88257	1.87825	1.14202
O88796	Rpp30	KTAFGIISTVKKPRPSEADDESLPVCKKAKC	_KPRPS(ph)EADDESLPVCK_	1.19287	0.66303	2.06232	1.32535	1.25911		S	251	3	___1	1	UID2276	0.482022	0.340277	-1.03336	-0.643856
O88852	Tspyl1	PIREPVEIPRPFGFQSG______________	_EPVEIPRPFGFQS(ph)G_	0.610811	2.32818	1.8506	3.30399	2.08939		S	378	2	___1	1	UID2278	0.234133	1.19232	-0.932003	-1.53136
Q3U3M5	Ccnk;Ccnk	PQPSPPRQAKRAVVVSPKEENKATEPPPPPK	_AVVVS(ph)PKEENK_	NaN	-0.792218	-0.591804	-1.11417	-0.792218		S	341	2	___1	1	UID2279	NaN	-0.404363	0.237319	0.45038
Q3U3M5	Ccnk;Ccnk	QQQQAQQPKKPSPQPSPPRQAKRAVVVSPKE	_KPS(ph)PQPS(ph)PPR_	-0.760406	0.213448	0.18521	-0.417508	-0.116149		S	329	2	___1	1	UID2281	-0.349842	0.11023	-0.134683	0.137897
O88888	Apba3	EAGGDDLLGLLRDEASSPAQSVPQDPAQTAP	_DEAS(ph)SPAQSVPQDPAQTAPR_	-0.436624	0.0890208	-0.014339	0.781474	0.0373409		S	121	2	___1	0.949047	UID2282	-0.211949	0.0465608	-0.0391473	-0.399902
O88888	Apba3	AGGDDLLGLLRDEASSPAQSVPQDPAQTAPR	_DEASS(ph)PAQSVPQDPAQTAPR_	-0.0697656	0.0890208	NaN	0.903166	0.0890208		S	122	2	___1	0.886764	UID2283	-0.0557113	0.0465608	#VALUE!	-0.454486
O88907	Pias1	SPLSNKGILSLPHQASPVSRTPSLPAVDTSY	_GILSLPHQAS(ph)PVSR_	1.11212	1.24456	1.91775	1.57529	1.40993		S	503	2	___1	0.999998	UID2284	0.447632	0.637842	-0.964151	-0.755965
O88907	Pias1	SNKGILSLPHQASPVSRTPSLPAVDTSYINT	_GILSLPHQASPVS(ph)R_	1.21848	1.11193	1.90602	1.81513	1.5168		S	506	3	___1	0.908331	UID2285	0.49293	0.569977	-0.958533	-0.863546
O88935	Syn1	VAGGPGAPPAARPPASPSPQRQAGAPQATRQ	_PVAGGPGAPPAARPPAS(ph)PSPQR_	-1.30405	NaN	-2.16094	3.62931	-1.30405		S	551	3	___1	0.845271	UID2287	-0.581367	NaN	0.988557	-1.67729
O88935	Syn1	GGPGAPPAARPPASPSPQRQAGAPQATRQAS	_PVAGGPGAPPAARPPASPS(ph)PQR_	-1.43788	4.92058	-1.86919	2.91602	0.73907		S	553	3	___1	0.822416	UID2288	-0.638366	2.51884	0.848878	-1.35734
O89032	Sh3pxd2a	SAAAEAKGRLAERAASQGSESPLLPTQRKGI	_AAS(ph)QGSESPLLPTQR_	-0.349396	3.38848	0.18478	-1.83094	-0.082308		S	1029	2	___1	0.999999	UID2289	-0.174801	1.73487	-0.134477	0.771886
O89032	Sh3pxd2a	AKGRLAERAASQGSESPLLPTQRKGIPVSPV	_AASQGSES(ph)PLLPTQR_	5.97694	5.02645	7.43775	NaN	5.97694	Up	S	1034	2	___1	0.999913	UID2290	2.51947	2.57301	-3.6069	#VALUE!
O89032	Sh3pxd2a	SPAVARIAPQRAQISSPNLRTRPPPRRESSL	_AQISS(ph)PNLR_	3.40889	3.22447	1.97784	3.7241	3.31668	Up	S	420	2	___1	0.999991	UID2292	1.42578	1.65095	-0.992919	-1.7198
O89032	Sh3pxd2a	SKPKEAEENPVGACESQGSPLKVKYEEPEYD	_EAEENPVGACES(ph)QGSPLK_	NaN	0.849375	-0.372338	0.413554	0.413554		S	543	2	___1	0.829766	UID2293	NaN	0.435629	0.132248	-0.234873
O89032	Sh3pxd2a	KEAEENPVGACESQGSPLKVKYEEPEYDVPA	_EAEENPVGACESQGS(ph)PLK_	-0.0565177	1.11288	0.200899	0.602415	0.401657		S	546	2	___1	0.999998	UID2294	-0.0500692	0.570463	-0.142194	-0.319586
O89032	Sh3pxd2a	SELPPQMASEGSRRGSADIIPLTATTPPCVP	_RGS(ph)ADIIPLTATTPPCVPK_	-1.17525	0.208481	-0.564585	1.2588	-0.178052		S	812	2	___1	1	UID2295	-0.526514	0.107688	0.224287	-0.614006
O89032	Sh3pxd2a	ALAIPERTTSKLAQGSPAVARIAPQRAQISS	_LAQGS(ph)PAVAR_	5.94793	5.59017	6.08103	-0.423349	5.76905	Up	S	405	2	___1	1	UID2296	2.50711	2.86146	-2.95736	0.140517
O89032	Sh3pxd2a	PPKDNNLSCALRRNESLTATDSLRGVRRNSS	_NES(ph)LTATDSLR_	1.70782	2.13504	1.18713	3.00043	1.92143		S	993	2	___1	1	UID2297	0.701327	1.09349	-0.614359	-1.39521
O89086	Rbm3	RPGGYGYGYGRSRDYSGSQGGYDRYSGGNYR	_DYS(ph)GSQGGYDR_	2.37491	1.60676	3.17123	0.314012	1.99083		S	133	2	___1	0.99999	UID2299	0.985428	0.823179	-1.56426	-0.190223
O89110	Casp8	SVLDEMSLKMAELCDSPREQDSESRTSDKVY	_MAELCDS(ph)PR_	0.0226197	NaN	0.163421	-0.748339	0.0226197		S	213	2	___1	1	UID2301	-0.0163661	NaN	-0.124251	0.28629
P00520-4		MGQQPGKVLGDQRRPSLPALHFIKGAGKRDS	_RPS(ph)LPALHFIK_	-2.28344	-3.43303	NaN	-1.51884	-2.28344		S	16	3	___1	1	UID2302	-0.998472	-1.75565	#VALUE!	0.631896
P04627	Araf;Araf;Araf;Araf	TVCVDMSTNRRQFYHSIQDLSGGSRQQEAPS	_QFYHS(ph)IQDLSGGSR_	NaN	1.02553	2.59675	-0.434709	1.02553		S	157	2	___1	0.996256	UID2304	NaN	0.525768	-1.28923	0.145612
P05480	Src;Src	GSNKSKPKDASQRRRSLEPSENVHGAGGAFP	_S(ph)LEPSENVHGAGGAFPASQTPSK_	-0.799223	-0.686207	-0.986126	0.430898	-0.742715		S	17	3	___1	0.999907	UID2307	-0.366373	-0.350118	0.426104	-0.242652
P05480	Src;Src	SKPKDASQRRRSLEPSENVHGAGGAFPASQT	_RRSLEPS(ph)ENVHGAGGAFPASQTPSK_	NaN	-0.516133	-1.09428	-0.124839	-0.516133		S	21	4	___1	0.823171	UID2308	NaN	-0.263092	0.477885	0.00662128
P05627	Jun;Jund	DGLLASPDLGLLKLASPELERLIIQSNGLVT;SDLLTSPDVGLLKLASPELERLIIQSSNGHI	_LAS(ph)PELER_	-1.33061	2.26832	-1.56359	3.30315	0.468855		S	73	2	___1	1	UID2309	-0.59268	1.16169	0.702569	-1.53099
P07901	Hsp90aa1	YPITLFVEKERDKEVSDDEAEEKEEKEEEKE	_EVS(ph)DDEAEEK_	-1.95745	-1.16983	-2.14953	-0.748603	-1.56364		S	231	2	___1	1	UID2311	-0.85964	-0.597583	0.983094	0.286408
P07901	Hsp90aa1	EEKESDDKPEIEDVGSDEEEEEKKDGDKKKK	_ESDDKPEIEDVGS(ph)DEEEEEKK_	-2.6039	-1.32415	-2.17851	-0.578011	-1.75133		S	263	3	___1	1	UID2312	-1.13495	-0.676549	0.996967	0.20989
P07901	Hsp90aa1	YEQFSKNIKLGIHEDSQNRKKLSELLRYYTS	_LGIHEDS(ph)QNR_	-1.42525	-1.79193	-1.97328	-1.08579	-1.60859		S	454	2	___1	1	UID2313	-0.632987	-0.915909	0.898711	0.437654
P09450	Junb	PFYHDDSYAAAGYGRSPGSLSLHDYKLLKPT	_S(ph)PGSLSLHDYK_	-2.11987	-0.351585	-1.1878	-1.61696	-1.40238		S	23	2	___1	0.999998	UID2318	-0.928814	-0.178894	0.522658	0.675906
P09528	Fth1	___________MTTASPSQVRQNYHQDAEAA	_(ac)TTAS(ph)PSQVR_	-0.809501	-1.61253	-1.89302	-1.32022	-1.46637		S	5	2	___1	0.999905	UID2319	-0.370751	-0.824111	0.860288	0.542803
P09633	Hoxc9	GSPGELRDRAPQTLPSPEADALAGSKHKEEK	_APQTLPS(ph)PEADALAGSK_	0.95633	2.44834	1.36582	-1.57114	1.16108		S	159	2	___1	1	UID2320	0.381283	1.25381	-0.699911	0.655352
P10107	Anxa1	___________MAMVSEFLKQARFLENQEQE	_MAMVS(ph)EFLK_	-0.00742381	1.70187	-0.614724	1.42265	0.707613		S	5	2	___1	1	UID2322	-0.0291611	0.871844	0.248292	-0.687497
P11031	Sub1	ISLNMEQWSQLKEQISDIDDAVRKL______	_EQIS(ph)DIDDAVR_	-2.93443	-2.44195	NaN	-3.18201	-2.93443	Down	S	118	2	___1	1	UID2324	-1.27572	-1.24852	#VALUE!	1.3779
P11499	Hsp90ab1;Hsp90ab1	YPITLYLEKEREKEISDDEAEEEKGEKEEED	_EREKEIS(ph)DDEAEEEK_	-0.175259	0.0961099	-0.0533464	0.233344	0.0213817		S	226	3	___1	1	UID2327	-0.100639	0.0501883	-0.0204722	-0.15404
P11499	Hsp90ab1;Hsp90ab1	EDKEDEEKPKIEDVGSDEEDDSGKDKKKKTK	_IEDVGS(ph)DEEDDS(ph)GKDKK_	0.178567	0.240484	-0.175217	0.00264723	0.0906071		S	255	2	___1	1	UID2328	0.0500489	0.124063	0.0378742	-0.0505621
P11499	Hsp90ab1;Hsp90ab1	EKPKIEDVGSDEEDDSGKDKKKKTKKIKEKY	_IEDVGS(ph)DEEDDS(ph)GKDKK_	-2.04203	0.599289	-0.732883	NaN	-0.732883		S	261	2	___1	1	UID2329	-0.895663	0.307662	0.304861	#VALUE!
P11499	Hsp90ab1;Hsp90ab1	YEAFSKNLKLGIHEDSTNRRRLSELLRYHTS	_LGIHEDS(ph)TNR_	0.367246	-0.394648	0.0137201	-0.384601	-0.18544		S	445	2	___1	0.999289	UID2330	0.130404	-0.200929	-0.0525808	0.123136
P12382	Pfkl	DYVSGELEHVTRRTLSIDKGF__________	_TLS(ph)IDKGF_	-3.51927	-1.78295	-4.44768	-2.11438	-2.81683	Down	S	775	2	___1	1	UID2334	-1.52479	-0.911316	2.08335	0.899021
P13595	Ncam1	ASAGETSKAPPASKASPAPTPTPAGAASPLA	_AS(ph)PAPTPTPAGAASPLAAVAAPATDAPQAK_	3.02336	6.1783	4.05556	4.03755	4.04655	Up	S	946	3	___1	0.99219	UID2336	1.26159	3.1624	-1.98765	-1.8604
P13595	Ncam1	AGQATPSKGVTASSSSPASAPKVAPLVDLSD	_GVTASSSS(ph)PASAPK_	3.57185	6.87331	3.90578	5.58335	4.74456	Up	S	887	2	___1	0.96075	UID2337	1.49518	3.51803	-1.91594	-2.55376
P13595	Ncam1	PGTVKNPPEAATAPASPKSKAATTNPSQGED	_NPPEAATAPAS(ph)PK_	3.27357	6.69318	3.96422	5.60571	4.78496	Up	S	1005	2	___1	1	UID2338	1.36815	3.42586	-1.94392	-2.5638
P13808	Slc4a2	PGHRSYNLQERRRIGSMTGVEQALLPRVPTD	_IGS(ph)MTGVEQALLPR_	-1.39669	-0.0500289	-3.70683	0.724854	-0.723359		S	239	2	___1	0.999654	UID2339	-0.620823	-0.0245899	1.72866	-0.374505
P13864	Dnmt1	ADDDEEADDDVSEMPSPKKLHQGKKKKQNKD	_EADDDEEADDDVSEMPS(ph)PK_	NaN	0.128599	-0.292942	-1.02877	-0.292942		S	717	2	___1	1	UID2340	NaN	0.0668125	0.094236	0.412077
P13864	Dnmt1	_MPARTAPARVPALASPAGSLPDHVRRRLKD	_VPALAS(ph)PAGSLPDHVR_	-1.16628	1.77126	-0.073452	0.625659	0.276103		S	15	3	___1	0.999988	UID2343	-0.522696	0.907352	-0.0108465	-0.330012
P14115	Rpl27a	FGKVGMRHYHLKRNQSFCPTVNLDKLWTLVS	_NQS(ph)FCPTVNLDK_	-1.37441	-0.677595	-1.63115	-0.726373	-1.05039		S	68	2	___1	1	UID2344	-0.611337	-0.345711	0.734916	0.276437
P14131	Rps16	_____________MPSKGPLQSVQVFGRKKT	_PS(ph)KGPLQSVQVFGR_	-1.34474	-2.12713	-1.3113	-3.33393	-1.73594		S	3	3	___1	0.999965	UID2345	-0.598697	-1.08743	0.581785	1.44604
P14148	Rpl7;Rpl7	GYGKINKKRIALTDNSLIARSLGKFGIICME	_IALTDNS(ph)LIAR_	-0.704276	-0.709375	-0.71134	-0.810764	-0.710357		S	195	2	___1	0.999232	UID2346	-0.325937	-0.361972	0.294547	0.31429
P14152	Mdh1	TVQQRGAAVIKARKLSSAMSAAKAIADHIRD	_KLS(ph)SAMSAAK_	2.0458	1.98874	0.426709	1.78746	1.8881		S	241	2	___1	0.999469	UID2347	0.845269	1.01863	-0.250303	-0.851131
P14602	Hspb1;Hspb1	_MTERRVPFSLLRSPSWEPFRDWYPAHSRLF	_SPS(ph)WEPFR_	-0.554151	-0.427998	-1.78848	3.28046	-0.491074		S	15	2	___1	1	UID2351	-0.262002	-0.217994	0.810237	-1.52081
P14733	Lmnb1	QQRAGSRASAPATPLSPTRLSRLQEKEELRE	_ASAPATPLS(ph)PTR_	-0.846054	NaN	-0.399708	0.518817	-0.399708		S	24	2	___1	0.966956	UID2354	-0.386318	NaN	0.145351	-0.282088
P14873	Map1b	VSFEFSEAKDENERASLSPMDEPVPDSESPV	_AS(ph)LSPMDEPVPDSES(ph)PVEK_	0.185758	-0.485075	-0.976017	NaN	-0.485075		S	1371	2	___1	0.775015	UID2356	0.0531114	-0.2472	0.421264	#VALUE!
P14873	Map1b	FEFSEAKDENERASLSPMDEPVPDSESPVEK	_ASLS(ph)PMDEPVPDSESPVEK_	0.230197	-0.308226	-1.09796	0.376448	-0.0390145		S	1373	2	___1	0.970375	UID2357	0.0720372	-0.156708	0.479644	-0.218229
P14873	Map1b	NERASLSPMDEPVPDSESPVEKVLSPLRSPP	_ASLSPMDEPVPDS(ph)ESPVEK_	0.542444	NaN	-0.749668	-1.2088	-0.749668		S	1382	2	___1	0.976347	UID2358	0.205017	NaN	0.312898	0.492827
P14873	Map1b	RASLSPMDEPVPDSESPVEKVLSPLRSPPLL	_ASLSPMDEPVPDSES(ph)PVEK_	0.316736	-1.33838	-0.410587	-1.10922	-0.759904		S	1384	2	___1	0.999873	UID2359	0.108892	-0.683831	0.15056	0.448161
P14873	Map1b	ASAELDIKDVSDERLSPAKSPSLSPSPPSPI	_DVSDERLS(ph)PAK_	0.823457	-0.192671	-0.1246	-0.47516	-0.158636		S	1247	2	___1	0.999296	UID2360	0.324695	-0.0975791	0.0136409	0.163756
P14873	Map1b	RLSPAKSPSLSPSPPSPIEKTPLGERSVNFS	_SPSLSPSPPS(ph)PIEK_	0.585661	0.361513	-0.206172	0.614963	0.473587		S	1260	2	___1	0.999918	UID2364	0.223423	0.185993	0.0526941	-0.325214
P14873	Map1b	KPSVTEKEVSSKEEQSPVKAEVAEKQATESK	_EEQS(ph)PVKAEVAEK_	0.545381	-0.28064	-0.43034	-0.261793	-0.271216		S	614	2	___1	1	UID2365	0.206268	-0.142592	0.160017	0.0680517
P14873	Map1b	KLSPKSDISPLTPRESSPLYSPGFSDSTSAA	_ES(ph)SPLYSPGFSDSTSAAK_	1.3613	-0.103737	-0.881383	-0.889466	-0.49256		S	1788	2	___1	0.871771	UID2366	0.553754	-0.052072	0.375957	0.349592
P14873	Map1b	LSPKSDISPLTPRESSPLYSPGFSDSTSAAK	_ESS(ph)PLYS(ph)PGFSDSTSAAK_	1.3613	-0.298218	-0.796844	-0.98668	-0.547531		S	1789	2	___1	0.976825	UID2367	0.553754	-0.151586	0.335483	0.393197
P14873	Map1b	AEADVHLKEKRESVVSGDDRAEEDMDDVLEK	_RES(ph)VVS(ph)GDDR_	1.26344	-0.122919	-0.328581	-0.338796	-0.22575		S	992	2	___1	1	UID2370	0.512075	-0.0618874	0.111298	0.102591
P14873	Map1b	EEDMDDVLEKGEAEQSEEEGEEEDKAEDARE	_GEAEQS(ph)EEEGEEEDKAEDAR_	0.156573	-0.179549	-0.631674	-0.21357	-0.196559		S	1013	3	___1	1	UID2372	0.040682	-0.0908644	0.256407	0.0464211
P14873	Map1b	QSALALDERKLGGDVSPTQIDVSQFGSFKED	_LGGDVS(ph)PTQIDVSQFGSFK_	0.685159	-0.47522	-1.31874	-0.437906	-0.456563		S	1497	2	___1	1	UID2373	0.265797	-0.242157	0.585347	0.147046
P14873	Map1b	EMSPSKEECPRPMSISPPDFSPKTAKSRTPV	_PMSIS(ph)PPDFSPK_	NaN	-2.42179	-0.553472	-2.84009	-2.42179		S	1616	2	___1	0.99997	UID2375	NaN	-1.2382	0.218967	1.22453
P14873	Map1b	KEECPRPMSISPPDFSPKTAKSRTPVQDHRS	_PM(ox)SISPPDFS(ph)PK_	0.00823336	-0.634149	-0.733859	-0.0994132	-0.366781		S	1621	2	___1	1	UID2376	-0.022493	-0.32348	0.305329	-0.00478333
P14873	Map1b	QYGYLGTSAKQPGIQSPSREPASSIHDETLP	_QPGIQS(ph)PSR_	-0.687334	-0.78428	-0.937289	-0.582736	-0.735807		S	1073	2	___1	0.999988	UID2378	-0.318722	-0.400301	0.402722	0.212009
P14873	Map1b	DFLSADSKVLGRRSESPFEGKNGKQGFPDRE	_SES(ph)PFEGK_	0.52506	-0.373919	-0.515957	-0.362672	-0.368295		S	1422	2	___1	1	UID2379	0.197614	-0.190322	0.201006	0.1133
P14873	Map1b	VQSLEGEKLSPKSDISPLTPRESSPLYSPGF	_SDIS(ph)PLTPR_	-0.416984	-0.528952	-2.94025	-0.562401	-0.545677		S	1781	2	___1	0.999879	UID2380	-0.203585	-0.269651	1.36166	0.202888
P14873	Map1b	ESESYSYETSTKTTRSPDTSAYCYETMEKIT	_S(ph)PDTSAYCYETMEK_	-0.134496	0.342115	-1.10228	-0.558486	-0.346491		S	2030	2	___1	0.999997	UID2383	-0.0832788	0.176067	0.481712	0.201132
P14873	Map1b	PNEIKVSAEGEARSVSPGVTQAVVEEHCASP	_SVS(ph)PGVTQAVVEEHCAS(ph)PEEK_	2.11689	0.730585	0.553912	1.04048	0.885533		S	1293	3	___1	0.876329	UID2384	0.875544	0.374845	-0.311202	-0.516078
P14873	Map1b	VSPGVTQAVVEEHCASPEEKTLEVVSPSQSV	_SVSPGVTQAVVEEHCAS(ph)PEEK_	-1.10188	-1.97551	-2.19492	-1.84672	-1.91112		S	1307	2	___1	1	UID2385	-0.495268	-1.00984	1.00482	0.778965
P14873	Map1b	SLASEKVQSLEGEKLSPKSDISPLTPRESSP	_VQSLEGEKLS(ph)PK_	0.455224	-1.01927	-0.939795	-0.637798	-0.788797		S	1775	2	___1	1	UID2388	0.167872	-0.520542	0.403922	0.236707
P15864	Hist1h1c;Hist1h1d	KKAKKTGAAAGKRKASGPPVSELITKAVAAS;KKKAAKKPAGVRRKASGPPVSELITKAVAAS	_KAS(ph)GPPVSELITK_	-1.29665	-1.91713	-2.78184	-1.58438	-1.75075		S	37	3	___1	1	UID2390	-0.578219	-0.979971	1.28582	0.661294
P15864	Hist1h1c	______________MSEAAPAAPAAAPPAEK	_S(ph)EAAPAAPAAAPPAEK_	-0.721133	-2.2679	-1.37604	-1.42021	-1.39812		S	2	2	___1	1	UID2391	-0.333116	-1.15946	0.612777	0.587653
P16045	Lgals1	________MACGLVASNLNLKPGECLKVRGE	_(ac)ACGLVAS(ph)NLNLKPGECLK_	3.10433	1.16927	0.814343	1.44453	1.3069		S	8	2	___1	1	UID2392	1.29608	0.599318	-0.435885	-0.697312
P16045	Lgals1	GECLKVRGEVASDAKSFVLNLGKDSNNLCLH	_S(ph)FVLNLGK_	1.1851	0.879853	0.755048	1.49844	1.03248		S	30	2	___1	1	UID2393	0.478713	0.451224	-0.407498	-0.721492
P16254	Srp14;Srp14	TLKKYDGRTKPIPRKSSVEGLEPAENKCLLR	_KS(ph)SVEGLEPAENK_	-1.10546	1.2968	-3.18832	NaN	-1.10546		S	44	2	___1	0.906468	UID2394	-0.496794	0.664574	1.48042	#VALUE!
P16254	Srp14;Srp14	LKKYDGRTKPIPRKSSVEGLEPAENKCLLRA	_KSS(ph)VEGLEPAENK_	-1.66596	1.18856	-3.00624	0.845855	-0.410052		S	45	2	___1	0.998816	UID2395	-0.7355	0.609188	1.39325	-0.428779
P17095	Hmga1	TEKRGRGRPRKQPPVSPGTALVGSQKEPSEV	_KQPPVS(ph)PGTALVGSQK_	-2.58077	-2.17084	-2.87913	-0.0917883	-2.3758	Down	S	36	3	___1	0.999987	UID2399	-1.1251	-1.10979	1.33239	-0.00820342
P17095	Hmga1	PRKQPPVSPGTALVGSQKEPSEVPTPKRPRG	_KQPPVSPGTALVGS(ph)QKEPSEVPTPK_	-0.235026	-2.7964	-1.37052	1.41272	-0.802773		S	44	3	___1	0.983017	UID2400	-0.126092	-1.42989	0.610133	-0.683043
P17182	Eno1;Eno1	LAKYNQILRIEEELGSKAKFAGRSFRNPLAK	_IEEELGS(ph)KAK_	-0.822624	-1.19189	-1.72667	-0.717332	-1.00726		S	419	2	___1	1	UID2402	-0.376339	-0.60887	0.780646	0.272382
P17751	Tpi1;Tpi1	VNDGVAQSTRIIYGGSVTGATCKELASQPDV	_IIYGGS(ph)VTGATCK_	-1.85745	-1.93744	-2.6854	-3.43754	-2.31142		S	262	2	___1	0.998293	UID2403	-0.817053	-0.990366	1.23964	1.49252
P17751	Tpi1	QNCYKVTNGAFTGEISPGMIKDLGATWVVLG	_VTNGAFTGEIS(ph)PGMIK_	-1.65442	-0.359351	-4.90328	NaN	-1.65442		S	130	2	___1	0.999598	UID2404	-0.730584	-0.182868	2.30147	#VALUE!
P18654	Rps6ka3;Rps6ka3	TFYFDPEFTAKTPKDSPGIPPSANAHQLFRG	_DS(ph)PGIPPSANAHQLFR_	2.50695	1.74635	2.2141	2.29138	2.25274	Up	S	369	2	___1	1	UID2408	1.04166	0.894604	-1.10603	-1.07716
P18654	Rps6ka3;Rps6ka3	KGAMAATYSALNRNQSPVLEPVGRSTLAQRR	_NQS(ph)PVLEPVGR_	3.3734	2.24631	1.92146	2.059	2.15266	Up	S	715	2	___1	1	UID2409	1.41067	1.15043	-0.965925	-0.972931
P18654	Rps6ka3;Rps6ka3	QTVGVHSIVQQLHRNSIQFTDGYEVKEDIGV	_NS(ph)IQFTDGYEVK_	NaN	1.19207	0.129585	2.24021	1.19207		S	415	2	___1	1	UID2410	NaN	0.610983	-0.108052	-1.05421
F8WGL3	Cfl1;Cfl1	_____________MASGVAVSDGVIKVFNDM	_AS(ph)GVAVSDGVIK_	-0.814586	-0.21764	-1.65622	-0.828564	-0.821575		S	3	2	___1	1	UID2411	-0.372916	-0.110355	0.746915	0.322274
F8WGL3	Cfl1;Cfl1	PEEVKKRKKAVLFCLSEDKKNIILEEGKEIL	_AVLFCLS(ph)EDKK_	-1.00477	-0.919378	-2.15775	0.082648	-0.962074		S	41	3	___1	1	UID2412	-0.453913	-0.46943	0.98703	-0.0864461
F8WGL3	Cfl1;Cfl1	EEVKDRCTLAEKLGGSAVISLEGKPLSHPAP	_LGGS(ph)AVISLEGKPL_	0.050055	-0.633549	NaN	-1.14812	-0.633549		S	156	2	___1	1	UID2413	-0.00468191	-0.323173	#VALUE!	0.465609
P19426	Rdbp;Rdbp	KQSSSGPASQGGVKRSLSEQPVVDTATATEQ	_S(ph)LSEQPVVDTATATEQAK_	-2.34104	-1.16655	-2.48749	-1.95219	-2.14662		S	49	2	___1	0.853349	UID2415	-1.02301	-0.595904	1.14489	0.826274
P19426	Rdbp;Rdbp	SSSGPASQGGVKRSLSEQPVVDTATATEQAK	_SLS(ph)EQPVVDTATATEQAK_	-1.59469	-0.988814	-2.42915	-1.00061	-1.29765		S	51	2	___1	0.945615	UID2416	-0.705147	-0.50496	1.11696	0.399445
P19426	Rdbp;Rdbp	EKGPVPTFQPFQRSMSADEDLQEPSRRPQRK	_SM(ox)S(ph)ADEDLQEPSR_	-1.88219	-1.00736	-1.01314	-0.719727	-1.01025		S	115	2	___1	0.999452	UID2417	-0.827589	-0.514449	0.439038	0.273456
P19426	Rdbp	AATGKSVWGSLAVQNSPKGCHRDKRTQIVYS	_SVWGSLAVQNS(ph)PK_	0.630053	1.23857	0.880072	0.421019	0.755062		S	357	2	___1	1	UID2418	0.242328	0.634779	-0.467354	-0.238221
P20152	Vim	REKLQEEMLQREEAESTLQSFRQDVDNASLA	_EEAES(ph)TLQSFR_	0.0701825	-0.213139	-0.471325	-0.62686	-0.342232		S	201	2	___1	0.96915	UID2420	0.00388999	-0.108052	0.179638	0.231801
P20152	Vim	QEEMLQREEAESTLQSFRQDVDNASLARLDL	_EEAESTLQS(ph)FR_	0.704825	-0.27582	1.07862	-0.132833	0.285996		S	205	2	___1	0.99996	UID2421	0.274172	-0.140126	-0.56241	0.0102069
P20152	Vim	LPTFSSLNLRETNLESLPLVDTHSKRTLLIK	_ETNLES(ph)LPLVDTHSK_	3.03661	-0.293243	3.26472	-0.682525	1.37168		S	430	2	___1	0.999669	UID2422	1.26724	-0.149041	-1.60902	0.256769
P20152	Vim	LQEAEEWYKSKFADLSEAANRNNDALRQAKQ	_FADLS(ph)EAANR_	-0.621517	-1.09356	-1.0333	-0.710134	-0.871717		S	299	2	___1	1	UID2423	-0.290692	-0.558559	0.44869	0.269153
P20152	Vim;Vim	PGGAYVTRSSAVRLRSSVPGVRLLQDSVDFS	_LRS(ph)SVPGVR_	-2.61732	-0.78216	-2.33044	-1.53809	-1.93426		S	72	2	___1	0.997643	UID2424	-1.14067	-0.399216	1.0697	0.640528
P20152	Vim;Vim	GGAYVTRSSAVRLRSSVPGVRLLQDSVDFSL	_LRSS(ph)VPGVR_	-3.38183	-0.924927	-3.83133	-1.6518	-2.51681		S	73	2	___1	0.99984	UID2425	-1.46626	-0.472269	1.78827	0.691534
P20152	Vim	RQAKQESNEYRRQVQSLTCEVDALKGTNESL	_QVQS(ph)LTCEVDALK_	0.591459	0.31453	0.252992	0.201827	0.283761		S	325	2	___1	1	UID2428	0.225892	0.161952	-0.167134	-0.139903
P20152	Vim;Vim	LGSALRPSTSRSLYSSSPGGAYVTRSSAVRL	_SLYSS(ph)SPGGAYVTR_	0.102127	0.871799	0.37099	-1.06555	0.236558		S	55	2	___1	0.975914	UID2429	0.0174944	0.447103	-0.223626	0.428571
P20152	Vim;Vim	GSALRPSTSRSLYSSSPGGAYVTRSSAVRLR	_SLYSSS(ph)PGGAYVTR_	0.100118	0.80144	0.41887	-0.761499	0.259494		S	56	2	___1	0.992754	UID2430	0.016639	0.411101	-0.24655	0.292193
P20152	Vim;Vim	PSSNRSYVTTSTRTYSLGSALRPSTSRSLYS	_TYS(ph)LGSALR_	-3.28723	-3.43018	-3.04171	-4.59623	-3.35871	Down	S	39	2	___1	0.999997	UID2431	-1.42597	-1.75419	1.41023	2.01225
P20357	Map2;Mtap2;Mtap2;Mtap2;Mtap2;Mtap2;Mtap2	AFKQAKDKVTDGISKSPEKRSSLPRPSSILP	_DKVTDGISKS(ph)PEK_	-5.06199	-0.49238	-3.17294	-1.99955	-2.58624		S	1539	2	___1	0.999459	UID2434	-2.1818	-0.250938	1.47306	0.847516
P20357	Map2;Mtap2;Mtap2;Mtap2	HAKARVDHGAEIITQSPSRSSVASPRRLSNV	_VDHGAEIITQS(ph)PSR_	-5.0491	-0.801038	-3.30067	-3.58314	-3.44191	Down	S	1783	2	___1	0.999999	UID2435	-2.17632	-0.408876	1.53421	1.55783
P20934	Evi2a	TAESDTWKRAKELTGSNLLLQSPGVLTAARE	_ELTGS(ph)NLLLQSPGVLTAAR_	NaN	6.31453	4.63184	7.60155	6.31453	Up	S	197	3	___1	0.95944	UID2437	NaN	3.23211	-2.26354	-3.45902
P22893	Zfp36	DLALPGQPHVLRQSISFSGLPSGRRSSPPPP	_QSIS(ph)FSGLPSGR_	-3.39205	-4.64323	-3.14524	-3.72515	-3.5586	Down	S	178	2	___1	0.999854	UID2444	-1.47061	-2.3749	1.4598	1.62152
P22893	Zfp36	QPHVLRQSISFSGLPSGRRSSPPPPGFSGPS	_QSISFSGLPS(ph)GR_	-3.37884	NaN	-3.28492	-2.63874	-3.28492	Down	S	184	2	___1	0.974788	UID2445	-1.46498	NaN	1.52667	1.13422
P23116	Eif3a	VKPGGWREKEKAREESWGPPRESRPSEEREW	_EES(ph)WGPPR_	3.12098	1.20607	4.33853	0.646997	2.16352		S	1149	2	___1	1	UID2446	1.30317	0.618145	-2.12312	-0.339583
P23116	Eif3a	LARRQTIEERKERLESLNIQREKEELEQREA	_LES(ph)LNIQR_	2.38311	-0.57366	2.72539	-5.06386	0.904725		S	584	2	___1	1	UID2447	0.988921	-0.292528	-1.35082	2.222
P23242	Gja1	AGHELQPLAIVDQRPSSRASSRASSRPRPDD	_KVAAGHELQPLAIVDQRPS(ph)SR_	0.310133	-2.25471	0.918268	0.698485	0.504309		S	364	4	___1	0.807349	UID2448	0.10608	-1.15271	-0.48564	-0.362677
P23242	Gja1	GHELQPLAIVDQRPSSRASSRASSRPRPDDL	_VAAGHELQPLAIVDQRPSS(ph)R_	0.105137	-2.11875	1.04684	0.376074	0.240606		S	365	3	___1	0.956168	UID2449	0.0187766	-1.08314	-0.547194	-0.218061
P23475	Xrcc6	DLTLPKVEAIKKRLGSLADEFKELVYPPGYN	_LGS(ph)LADEFK_	0.497774	-0.088171	-0.704206	0.464447	0.188138		S	518	2	___1	1	UID2450	0.185993	-0.044107	0.291132	-0.257701
P23950	Zfp36l1	KAVGTPAGGGFPRRHSVTLPSSKFHQNQLLS	_RHS(ph)VTLPSSK_	2.02727	0.532675	2.19806	2.34779	2.11266	Up	S	54	2	___1	0.999958	UID2451	0.837378	0.273576	-1.09835	-1.10247
P24547	Impdh2	FFSDGIRLKKYRGMGSLDAMDKHLSSQNRYF	_GM(ox)GS(ph)LDAM(ox)DK_	-0.030733	-0.817105	0.137259	-1.24268	-0.423919		S	416	2	___1	1	UID2452	-0.039088	-0.417097	-0.111726	0.508023
P24547	Impdh2	ITDTGRMGSRLVGIISSRDIDFLKEEEHDRF	_LVGIIS(ph)SR_	-0.255792	-2.4992	-1.01181	-2.78399	-1.75551		S	159	2	___1	0.961374	UID2453	-0.134936	-1.27781	0.438399	1.19937
P24547	Impdh2	TDTGRMGSRLVGIISSRDIDFLKEEEHDRFL	_LVGIISS(ph)R_	-0.334173	-2.57107	-0.73459	-2.5295	-1.63204		S	160	2	___1	0.997602	UID2454	-0.168317	-1.31459	0.305679	1.08522
P24549	Aldh1a1	______________MSSPAQPAVPAPLADLK	_(ac)S(ph)SPAQPAVPAPLADLK_	-1.02824	0.168159	-2.56711	-0.919615	-0.973928		S	2	2	___1	0.777301	UID2455	-0.463907	0.0870554	1.18301	0.363115
P25206	Mcm3	VLEKEKKRKKASEDESDLEDEEEKSQEDTEQ	_ASEDES(ph)DLEDEEEK_	-0.411449	0.165769	-0.158734	-0.653863	-0.285091		S	672	2	___1	1	UID2456	-0.201228	0.0858326	0.0299829	0.243913
P26039	Tln1	SKLLLAAKALSTDPASPNLKSQLAAAARAVT	_ALSTDPAS(ph)PNLK_	-1.20057	-0.515186	-0.631927	2.59803	-0.573557		S	1328	2	___1	1	UID2458	-0.537299	-0.262607	0.256528	-1.21471
P26039	Tln1	AIVLDTASDVLDKASSLIEEAKKASGHPGDP	_ASS(ph)LIEEAK_	1.78729	1.26244	2.50207	1.94233	1.86481		S	1164	2	___1	0.999383	UID2459	0.735176	0.646992	-1.2439	-0.920598
P26039	Tln1	EATTEHIRQELAVFCSPEPPAKTSTPEDFIR	_QELAVFCS(ph)PEPPAK_	1.10117	2.40941	1.4113	2.50938	1.91036		S	2162	2	___1	1	UID2462	0.44297	1.23389	-0.721682	-1.17495
P26039	Tln1	VLVEDTKVLVQNAAGSQEKLAQAAQSSVATI	_VLVQNAAGS(ph)QEK_	3.09701	1.68099	2.84654	1.53792	2.26377		S	2040	2	___1	1	UID2463	1.29296	0.861161	-1.40882	-0.739203
P26039	Tln1	SQLVACTKVVAPTISSPVCQEQLVEAGRLVA	_VVAPTISS(ph)PVCQEQLVEAGR_	0.121149	1.75135	NaN	2.09302	1.75135		S	729	2	___1	0.990091	UID2464	0.0255958	0.897163	#VALUE!	-0.98819
P26040	Ezr	EAEKNERVQRQLLTLSNELSQARDENKRTHN	_QLLTLS(ph)NELSQAR_	-1.4372	-1.42503	-0.457458	0.397319	-0.941244		S	535	2	___1	0.993072	UID2465	-0.638074	-0.728168	0.172999	-0.227591
P26041	Msn	LKLNKKVTAQDVRKESPLLFKFRAKFYPEDV	_KES(ph)PLLFK_	-1.62258	-1.63725	-2.36484	-1.50574	-1.62992		S	74	2	___1	1	UID2466	-0.717027	-0.836759	1.08617	0.626019
P26350	Ptma	______________MSDAAVDTSSEITTKDL	_(ac)S(ph)DAAVDTSSEITTK_	-0.262867	-0.0774936	0.0273769	0.0661955	-0.0250584		S	2	2	___1	1	UID2468	-0.137949	-0.0386434	-0.0591191	-0.0790664
P26369	U2af2	PLTRGAKEEHGGLIRSPRHEKKKKVRKYWDV	_EEHGGLIRS(ph)PR_	-0.593744	-0.320068	-0.421427	-0.195455	-0.370748		S	79	2	___1	1	UID2470	-0.278864	-0.162767	0.155749	0.0382958
P26369	U2af2	______________MSDFDEFERQLNENKQE	_(ac)S(ph)DFDEFER_	0.13808	0.323085	-0.241123	0.429985	0.230583		S	2	2	___1	1	UID2471	0.0328061	0.16633	0.0694271	-0.242243
P26645	Marcks	ASSTSSPKAEDGAAPSPSSETPKKKKKRFSF	_AEDGAAPS(ph)PS(ph)SETPKK_	0.803654	0.989863	0.968516	0.906694	0.937605		S	138	2	___1	0.988373	UID2472	0.316262	0.507516	-0.509697	-0.456069
P26645	Marcks	STSSPKAEDGAAPSPSSETPKKKKKRFSFKK	_AEDGAAPSPS(ph)SETPK_	0.451905	0.600883	1.87016	2.60273	1.23552		S	140	2	___1	0.973436	UID2473	0.166458	0.308477	-0.941365	-1.21682
P26645	Marcks	TSSPKAEDGAAPSPSSETPKKKKKRFSFKKS	_AEDGAAPS(ph)PSS(ph)ETPK_	NaN	1.09498	3.52784	0.309061	1.09498		S	141	2	___1	0.991006	UID2474	NaN	0.561302	-1.735	-0.188003
P26645	Marcks	GEATAERPGEAAVASSPSKANGQENGHVKVN	_GEATAERPGEAAVASS(ph)PSK_	0.874463	2.70935	1.21484	1.41778	1.31631		S	27	2	___1	0.999416	UID2476	0.346418	1.38736	-0.627627	-0.685315
P26645	Marcks	ATAERPGEAAVASSPSKANGQENGHVKVNGD	_GEATAERPGEAAVASSPS(ph)K_	2.63848	NaN	2.17447	1.31431	2.17447		S	29	2	___1	0.830638	UID2477	1.09768	NaN	-1.08706	-0.638905
P26645	Marcks	SFKLSGFSFKKSKKESGEGAEAEGATAEGAK	_KES(ph)GEGAEAEGATAEGAK_	1.25011	1.09345	0.981673	0.726522	1.03756		S	171	2	___1	1	UID2478	0.506399	0.560519	-0.515996	-0.375253
P26645	Marcks	KKKKKRFSFKKSFKLSGFSFKKSKKESGEGA	_LS(ph)GFSFK_	1.74573	3.37957	2.3288	1.38705	2.03727		S	160	2	___1	1	UID2479	0.717474	1.73031	-1.16094	-0.671531
P26645	Marcks	KKRFSFKKSFKLSGFSFKKSKKESGEGAEAE	_LSGFS(ph)FKK_	2.76234	0.555903	2.46751	-0.854442	1.51171		S	163	2	___1	1	UID2480	1.15043	0.285461	-1.22735	0.333882
P26645	Marcks	ANGQENGHVKVNGDASPAAAEPGAKEELQAN	_VNGDAS(ph)PAAAEPGAK_	0.328652	1.64176	-0.262014	1.33784	0.833246		S	46	2	___1	1	UID2482	0.113967	0.841087	0.0794292	-0.649458
P27546	Map4;Mtap4	TAPPTETNLGMAKDMSPLPESEVTLGKDVVI	_DMS(ph)PLPESEVTLGK_	0.368174	0.574119	-0.947983	1.16445	0.471147		S	475	2	___1	1	UID2484	0.130799	0.294782	0.407842	-0.571686
P27546	Map4;Mtap4	VTPLSEEEVTSVKDMSPSAETEAPLAKNADL	_DMS(ph)PSAETEAPLAK_	-0.437291	-0.22355	-1.58628	0.209207	-0.330421		S	517	2	___1	1	UID2485	-0.212233	-0.11338	0.713432	-0.143213
P27546	Map4;Mtap4	APPMEEEIVPGNDTTSPKETETTLPIKMDLA	_DVAPPMEEEIVPGNDTTS(ph)PK_	-1.27739	-1.42624	-2.28618	-1.54097	-1.4836		S	345	2	___1	0.989086	UID2487	-0.570015	-0.728789	1.04852	0.641823
P27546	Map4;Mtap4	SMQHKGQSTVPPCTASPEPVKAAEQMSTLPI	_GQSTVPPCTAS(ph)PEPVK_	1.71094	1.5834	1.35747	2.20362	1.64717		S	598	2	___1	1	UID2489	0.702658	0.811224	-0.69591	-1.0378
P27546	Map4;Mtap4	LPETKVAEFNNVTPLSEEEVTSVKDMSPSAE	_VAEFNNVTPLS(ph)EEEVTSVK_	1.45799	1.59511	0.585596	1.51641	1.4872		S	506	2	___1	0.973484	UID2491	0.594931	0.817214	-0.326371	-0.729555
P27546	Map4;Mtap4;Mtap4;Mtap4;Mtap4;Mtap4	SQKLNFKEKAQAKVGSLDNVGHLPAGGAVKT	_VGS(ph)LDNVGHLPAGGAVK_	2.78485	1.74514	2.81701	0.440083	2.26499		S	1046	3	___1	1	UID2493	1.16002	0.893983	-1.39468	-0.246772
P27546	Map4;Mtap4;Mtap4;Mtap4	TVSAPDLKSVRSKVGSTENIKHQPGGGRAKV	_VGS(ph)TENIK_	3.09106	1.54815	2.91108	0.536858	2.22961		S	914	2	___1	0.99999	UID2494	1.29042	0.793188	-1.43972	-0.29018
P27612	Plaa	VSVSRDRTTRLWAPDSPNRGFTEMHCMSGHS	_LWAPDS(ph)PNR_	-1.77474	-0.845216	-1.56396	-0.714401	-1.20459		S	50	2	___1	1	UID2496	-0.781826	-0.431481	0.702746	0.271067
P28352	Apex1;Apex1;Apex1;Apex1	KRGKKAAADDGEEPKSEPETKKSKGAAKKTE	_AAADDGEEPKS(ph)EPETK_	-0.476288	-0.172621	-0.0644515	-0.738301	-0.324454		S	18	2	___1	1	UID2498	-0.228841	-0.0873195	-0.0151555	0.281787
P28667	Marcksl1	KAPRGDVTAEEAAGASPAKANGQENGHVRSN	_GDVTAEEAAGAS(ph)PAK_	-2.1665	-0.209677	-2.33832	0.556543	-1.18809		S	22	2	___1	1	UID2500	-0.94867	-0.106281	1.07348	-0.29901
P28667	Marcksl1	PKKKKKFSFKKPFKLSGLSFKRNRKEGGGDS	_KPFKLS(ph)GLS(ph)FK_	-1.60182	0.0405604	-2.68003	0.270889	-0.78063		S	101	2	___1	1	UID2501	-0.708184	0.021764	1.23707	-0.170881
P28667	Marcksl1	KKKFSFKKPFKLSGLSFKRNRKEGGGDSSAS	_LSGLS(ph)FKR_	-2.1061	-2.78631	-2.87206	-2.36816	-2.57723	Down	S	104	2	___1	1	UID2502	-0.922948	-1.42473	1.32901	1.01285
P28867-2	Prkcd;Prkcd;Prkcd	YSNFDPEFLNEKPQLSFSDKNLIDSMDQEAF	_PQLS(ph)FSDK_	-0.761659	-0.248918	NaN	0.526413	-0.248918		S	669	2	___1	0.849523	UID2504	-0.350375	-0.12636	#VALUE!	-0.285495
P29341	Pabpc1;Pabpc5	PFRLMWSQPDDRLRKSGVGNIFIKNLDKTID;PVRIMWSQRDPSLRKSGVGNIFIKNLDKSID	_S(ph)GVGNIFIK_	-0.960381	-0.00169094	-1.46554	0.149591	-0.481036		S	96	2	___1	1	UID2505	-0.435007	0.000144286	0.655627	-0.116473
P29533	Vcam1;Vcam1	IDLFKGDQLMNRQEFSSEEMTKSLETKSLEV	_QEFS(ph)SEEM(ox)TK_	0.964123	5.96281	-1.0841	5.77938	3.37175		S	165	2	___1	0.981405	UID2506	0.384602	3.05214	0.473008	-2.64169
P29533	Vcam1;Vcam1	DLFKGDQLMNRQEFSSEEMTKSLETKSLEVT	_QEFSS(ph)EEMTK_	0.97578	5.89235	-0.971288	6.82937	3.43406		S	166	2	___1	0.976889	UID2507	0.389567	3.01609	0.418999	-3.11266
P30415	Nktr	TKKRRIVMPDLEPSRSPTHRMKSSCVRERRS	_IVMPDLEPSRS(ph)PTHR_	1.89603	0.774168	1.53848	0.6115	1.15632		S	470	3	___1	0.84427	UID2509	0.781486	0.397146	-0.782571	-0.32366
P31324	Prkar2b	GAFNAPVINRFTRRASVCAEAYNPDEEEDDA	_RAS(ph)VCAEAYNPDEEEDDAESR_	NaN	-2.26576	-0.775514	-2.26483	-2.26483		S	112	3	___1	0.999996	UID2512	NaN	-1.15836	0.325271	0.966504
P32507-2		TQVFGNGGPVFWRSASPEPMRPDGREEDEEE	_SAS(ph)PEPMRPDGR_	0.189021	0.216059	NaN	1.43469	0.216059		S	414	2	___1	0.861851	UID2514	0.0545011	0.111566	#VALUE!	-0.692898
P33174	Kif4	VEPSENLQSLMEKNQSLVEENEKLSRGLSEA	_NQS(ph)LVEENEK_	-0.315685	0.460862	1.02612	-0.0410252	0.209918		S	395	2	___1	1	UID2516	-0.160443	0.236829	-0.537278	-0.030973
P33215	Nedd1	GKGSGAAQDEAGLARSKSTDIFSKETDAGKS	_S(ph)KSTDIFSK_	NaN	1.43461	-1.08887	0.159019	0.159019		S	377	2	___1	0.996156	UID2518	NaN	0.735089	0.475292	-0.120702
P33609	Pola1	FSVHTPKAIPSGKPASPVLRNEPLLTPIPLK	_PAS(ph)PVLR_	0.129459	-0.156373	-0.193069	-0.722919	-0.174721		S	215	2	___1	1	UID2520	0.0291349	-0.0790055	0.0464211	0.274888
P33611	Pola2;Pola2	VAARSPRQLLSPSSFSPSATPSQKYTSRTNR	_QLLSPSSFS(ph)PSATPSQK_	0.579562	-0.364188	-0.731419	-1.10898	-0.547803		S	152	2	___1	0.985927	UID2521	0.220825	-0.185343	0.304161	0.448055
P33611	Pola2;Pola2	SSYTTPSKGPLKRVSSTPETPLTKRSVAARS	_VSS(ph)TPETPLTK_	-0.0115398	0.64986	-1.2035	0.499243	0.243852		S	126	2	___1	0.993772	UID2522	-0.030914	0.333538	0.530171	-0.273308
P34022	Ranbp1;Ranbp1	EEELFKMRAKLFRFASENDLPEWKERGTGDV	_FAS(ph)ENDLPEWK_	-0.551552	-1.15714	-1.5452	-1.10898	-1.13306		S	60	2	___1	1	UID2523	-0.260895	-0.591093	0.693766	0.448055
P34152	Ptk2	ADSYNEGVKLQPQEISPPPTANLDRSNDKVY	_LQPQEIS(ph)PPPTANLDR_	-2.15775	-0.240958	-2.7874	-0.880113	-1.51893		S	948	2	___1	0.999974	UID2524	-0.944943	-0.122287	1.28848	0.345396
P35278	Rab5c;Rab5c	FARAKNWVKELQRQASPNIVIALAGNKADLA	_QAS(ph)PNIVIALAGNK_	NaN	-0.622776	-0.170222	1.10281	-0.170222		S	124	2	___1	1	UID2525	NaN	-0.31766	0.0354831	-0.544035
P35486	Pdha1	PCIFICENNRYGMGTSVERAAASTDYYKRGD	_YGMGTS(ph)VER_	5.36252	1.73267	4.77678	-6.79554	3.25472		S	232	2	___1	0.984884	UID2526	2.2578	0.887603	-2.33293	2.99874
P35486	Pdha1	GPILMELQTYRYHGHSMSDPGVSYRTREEIQ	_YHGHS(ph)MSDPGVS(ph)YR_	3.22067	4.8451	3.25023	0.347618	3.23545	Up	S	293	2	___1	0.999463	UID2527	1.34562	2.48021	-1.60209	-0.205297
P35486	Pdha1	ILMELQTYRYHGHSMSDPGVSYRTREEIQEV	_YHGHSMS(ph)DPGVSYR_	2.55645	4.92589	3.47169	0.245428	3.01407	Up	S	295	3	___1	0.98867	UID2528	1.06274	2.52155	-1.70811	-0.15946
P35564	Canx	EDSKPKAEEDEILNRSPRNRKPRRE______	_AEEDEILNRS(ph)PR_	-0.43188	-0.598529	-0.4785	-0.167457	-0.45519		S	582	3	___1	1	UID2530	-0.209929	-0.305253	0.183074	0.0257375
P35564	Canx	RDEEEEEEKLEEKQKSDAEEDGVTGSQDEED	_QKS(ph)DAEEDGVTGS(ph)QDEEDSKPK_	-0.498672	-1.97704	-0.641497	-1.29895	-0.970224		S	553	3	___1	1	UID2531	-0.238374	-1.01063	0.26111	0.533264
P35564	Canx	EEKQKSDAEEDGVTGSQDEEDSKPKAEEDEI	_QKS(ph)DAEEDGVTGS(ph)QDEEDSKPK_	NaN	-2.58414	-0.171105	-1.84447	-1.84447		S	563	3	___1	0.999532	UID2532	NaN	-1.32128	0.0359054	0.777956
P35569	Irs1;Irs1	_____________MASPPDTDGFSDVRKVGY	_(ac)AS(ph)PPDTDGFSDVR_	-1.19335	-2.11451	-0.590015	-3.31854	-1.65393		S	3	2	___1	0.999991	UID2533	-0.534224	-1.08097	0.236462	1.43914
P35569	Irs1;Irs1	AKVIRADTQGCRRRHSSETFSAPTRAGNTVP	_RHS(ph)SETFSAPTR_	-4.66901	-1.78508	-4.02298	-2.87635	-3.44966	Down	S	1096	2	___1	0.988919	UID2534	-2.01444	-0.912401	1.88002	1.2408
P35569	Irs1;Irs1	KVIRADTQGCRRRHSSETFSAPTRAGNTVPF	_HSS(ph)ETFSAPTR_	0.478364	-1.70968	2.33669	-2.52479	-0.615658		S	1097	2	___1	0.999996	UID2535	0.177727	-0.87382	-1.16472	1.08311
P35569	Irs1;Irs1	EGTMSRPASVDGSPVSPSTNRTHAHRHRGSS	_PASVDGSPVS(ph)PSTNR_	0.0654494	-0.728937	0.973496	-1.70435	-0.331744		S	343	2	___1	0.999982	UID2536	0.00187425	-0.371982	-0.512081	0.715103
P35569	Irs1;Irs1	PQGPGGMSAFTRVNLSPNHNQSAKVIRADTQ	_VNLS(ph)PNHNQSAK_	-1.3811	-1.6059	-1.34872	-2.81882	-1.4935		S	1074	2	___1	1	UID2539	-0.614182	-0.820718	0.599699	1.215
P35831	Ptpn12	TPHSGAEKDADVSEESPPPLPERTPESFVLA	_DADVS(ph)EES(ph)PPPLPER_	-1.75007	-2.80545	-2.84749	-1.91497	-2.36021		S	673	2	___1	1	UID2542	-0.771323	-1.43452	1.31725	0.809579
P35831	Ptpn12	DSPPAFSDKKDQITKSPAEVTDIGFGNRCGK	_S(ph)PAEVTDIGFGNR_	-3.44351	-1.35879	-4.04833	-1.26768	-2.40115		S	748	2	___1	1	UID2543	-1.49252	-0.694275	1.89216	0.51924
P35831	Ptpn12	EKHDAGGIHTEASADSPPAFSDKKDQITKSP	_HDAGGIHTEASADS(ph)PPAFSDK_	-2.28012	-2.65347	-2.55394	-1.60829	-2.41703	Down	S	734	3	___1	0.999985	UID2545	-0.99706	-1.35675	1.17671	0.672018
P35831	Ptpn12	ESAIEHIDKKLERNLSFEIKKVPLQEGPKSF	_NLS(ph)FEIKK_	-0.470061	0.0582789	-1.24247	0.175954	-0.205891		S	434	2	___1	1	UID2546	-0.226189	0.0308304	0.548831	-0.128298
P35831	Ptpn12	QDSDRYHPKPVLHMASPEQHPADLNRSYDKS	_PVLHM(ox)AS(ph)PEQHPADLNR_	-3.24912	-0.507282	-3.65205	0.0564257	-1.8782		S	396	3	___1	1	UID2547	-1.40974	-0.258563	1.70244	-0.0746842
P35831	Ptpn12	TTGTMVSSIDSEKQDSPPPKPPRTRSCLVEG	_QDS(ph)PPPKPPR_	-2.58765	-2.04209	-1.48252	-0.715467	-1.76231		S	331	2	___1	1	UID2548	-1.12803	-1.04391	0.663755	0.271545
P35979	Rpl12;Rpl12-ps1	GATSALAPKIGPLGLSPKKVGDDIAKATGDW	_IGPLGLS(ph)PK_	-2.92812	-2.28597	-1.10594	-4.48213	-2.60704	Down	S	38	2	___1	1	UID2549	-1.27303	-1.16871	0.483468	1.96107
P35980	Rpl18;Rpl18	KAGGKILTFDQLALESPKGRGTVLLSGPRKG	_ILTFDQLALES(ph)PK_	-3.0311	-2.70808	-1.97247	-3.11118	-2.86959	Down	S	130	2	___1	1	UID2550	-1.31689	-1.3847	0.898324	1.34613
P36916	Gnl1	SRSGSRERREEQTDTSDGESVTHHIRRLNQQ	_REEQTDTS(ph)DGESVTHHIR_	-0.769138	-0.312441	-1.57357	0.356009	-0.54079		S	51	4	___1	0.996687	UID2551	-0.353561	-0.158864	0.707348	-0.209061
P37804	Tagln	WFMKKAQEHKRDFTDSQLQEGKHVIGLQMGS	_DFTDS(ph)QLQEGK_	NaN	4.647	3.9198	5.18025	4.647	Up	S	166	2	___1	0.999578	UID2552	NaN	2.37884	-1.92265	-2.37295
P37889	Fbln2	EPEAAPRRVSEMEMASREALSLGTEAELPNS	_VSEM(ox)EM(ox)AS(ph)R_	2.9984	7.5433	2.97085	8.19928	5.27085	Up	S	574	2	___1	1	UID2554	1.25096	3.86086	-1.46833	-3.72713
P37913	Lig1;Lig1;Lig1;Lig1;Lig1	PPKVALKERNQVVPESDSPVKRTGRKVAQVL	_NQVVPES(ph)DSPVKR_	-0.343131	-0.241142	0.130949	-1.74039	-0.292137		S	65	3	___1	0.976352	UID2556	-0.172132	-0.122381	-0.108705	0.73127
P37913	Lig1;Lig1;Lig1;Lig1;Lig1	KVALKERNQVVPESDSPVKRTGRKVAQVLSC	_NQVVPESDS(ph)PVKR_	-0.437723	-0.412529	0.273737	-1.64861	-0.425126		S	67	2	___1	0.999992	UID2557	-0.212417	-0.210079	-0.177066	0.690104
P38532	Hsf1	PLSSSTLVRVKQEPPSPPHSPRVLEASPGRP	_VKQEPPS(ph)PPHS(ph)PR_	0.216312	NaN	1.81267	1.37417	1.37417		S	303	2	___1	1	UID2558	0.0661237	NaN	-0.913841	-0.665752
P39053-6		PNRAPPGVPSRKGPASPTRPAAPRPTEAPLL	_KGPAS(ph)PTRPAAPR_	-0.894034	-1.69057	-1.57394	-0.897785	-1.23586		S	847	2	___1	0.999764	UID2560	-0.406751	-0.864045	0.707525	0.353323
P39053-6	Dnm1;Dnm1	DDSWLQVQSVPAGRRSPTSSPTPQRRAPAVP	_RS(ph)PTSSPT(ph)PQR_	-4.10764	-2.87434	-4.84825	-2.21339	-3.49099	Down	S	770	2	___1	0.999993	UID2561	-1.77537	-1.46977	2.27513	0.943434
P39447	Tjp1	PYSPQAQPQAIHRIDSPGLKPASQQKAEASS	_IDS(ph)PGLKPASQQK_	1.60072	-0.957303	0.98728	0.968032	0.977656		S	912	2	___1	1	UID2563	0.655718	-0.488836	-0.51868	-0.483581
P40124	Cap1	VRSGPKPFSAPKPQTSPSPKPATKKEPALLE	_PQTS(ph)PSPKPATK_	0.890412	2.88696	1.04613	2.50764	1.77689		S	307	2	___1	0.999948	UID2565	0.35321	1.47825	-0.546856	-1.17417
P40124	Cap1	SGPKPFSAPKPQTSPSPKPATKKEPALLELE	_PQTSPS(ph)PKPATK_	0.964123	2.74948	0.87171	2.9765	1.8568		S	309	3	___1	0.998894	UID2566	0.384602	1.4079	-0.46335	-1.38447
P40201	Chd1	GPRSPLDQRSPYGSRSPFEHSAEHRSTPEHT	_S(ph)PFEHSAEHR_	-0.552486	-0.144545	NaN	-0.354634	-0.354634		S	1690	2	___1	1	UID2569	-0.261293	-0.0729531	#VALUE!	0.109695
P41183	Bcl6	PPNAPLNRKGLVSPQSPQKSDCQPNSPTESC	_GLVSPQS(ph)PQK_	1.16389	1.14216	3.4249	2.74004	1.95196		S	334	2	___1	0.999989	UID2570	0.469678	0.585443	-1.68571	-1.27841
P41230	Kdm5c	TSPKTFLEGKEELSHSPEPCTKMTMRLRRNH	_EELSHS(ph)PEPCTK_	0.483451	2.93602	1.47716	3.25765	2.20659		S	301	2	___1	0.999729	UID2572	0.179893	1.50335	-0.753215	-1.51058
P42128	Foxk1	KIQFTSLYHKEEAPASPLRPLYPQISPLKIH	_EEAPAS(ph)PLRPLYPQIS(ph)PLK_	NaN	-0.924184	-0.0756676	-0.670658	-0.670658		S	199	3	___1	0.999998	UID2576	NaN	-0.471889	-0.00978574	0.251446
P42128	Foxk1	RSSGLQTPECLSREGSPIPHDPDLGSKLASV	_EGS(ph)PIPHDPDLGSK_	-0.312279	-0.806133	0.255869	-0.826505	-0.559206		S	431	2	___1	1	UID2578	-0.158993	-0.411483	-0.168512	0.321351
P42128	Foxk1	TAPALVAAAAASVRQSPGPALARLEGREFEF	_QS(ph)PGPALAR_	0.0142496	-1.34146	0.221889	-1.99383	-0.663605		S	87	2	___1	1	UID2579	-0.0199308	-0.685408	-0.152244	0.844948
P42208	Sept2;Sept2	IEEHSIKIYHLPDAESDEDEDFKEQTRLLKA	_IYHLPDAES(ph)DEDEDFKEQTR_	-0.218651	-0.153813	0.0715893	0.0364351	-0.058689		S	218	3	___1	1	UID2583	-0.119119	-0.0776955	-0.0802862	-0.0657175
P42230	Stat5a;Stat5a	LYNEQRLVREANNCSSPAGVLVDAMSQKHLQ	_EANNCSS(ph)PAGVLVDAMSQK_	3.27226	3.73943	3.31169	NaN	3.31169	Up	S	128	2	___1	0.985204	UID2585	1.36759	1.91445	-1.63151	#VALUE!
P42230	Stat5a	EELLRRPMDSLDARLSPPAGLFTSARSSLS_	_LS(ph)PPAGLFTSAR_	2.71284	2.36093	3.61609	1.91577	2.53688	Up	S	779	2	___1	1	UID2586	1.12935	1.20908	-1.77724	-0.908686
P42932	Cct8;Cct8	DQIIMAKPAGGPKPPSGKKDWDDDQND____	_PAGGPKPPS(ph)GK_	-0.529946	-1.16446	-0.87371	-0.644887	-0.759298		S	537	2	___1	1	UID2587	-0.251693	-0.594835	0.372283	0.239887
P43274	Hist1h1e	KKKARKAAGGAKRKTSGPPVSELITKAVAAS	_KTS(ph)GPPVSELITK_	-1.46557	-1.50759	-2.15426	-1.44005	-1.48658		S	36	2	___1	0.999815	UID2588	-0.650159	-0.770412	0.985355	0.596554
P43274	Hist1h1e	______________MSETAPAAPAAPAPAEK	_(ac)S(ph)ETAPAAPAAPAPAEK_	-0.295866	-1.8446	-0.910271	-0.840376	-0.875324		S	2	2	___1	0.998379	UID2589	-0.152003	-0.942862	0.389787	0.327572
P43275	Hist1h1a	______________MSETAPVAQAASTATEK	_(ac)S(ph)ETAPVAQAASTATEKPAAAK_	-0.240205	0.122131	0.497867	1.61585	0.309999		S	2	2	___1	0.998362	UID2590	-0.128298	0.0635029	-0.28437	-0.774157
P43276	Hist1h1b	______________MSETAPAETAAPAPVEK	_(ac)S(ph)ETAPAETAAPAPVEK_	0.305093	-1.34328	0.967701	-0.582736	-0.138822		S	2	2	___1	0.999943	UID2592	0.103934	-0.686336	-0.509307	0.212009
P43276	Hist1h1b	ETAPAETAAPAPVEKSPAKKKTTKKAGAAKR	_(ac)SETAPAETAAPAPVEKS(ph)PAKK_	-1.15695	-0.467228	-0.113535	-0.61671	-0.541969		S	18	2	___1	1	UID2593	-0.518722	-0.238068	0.00834348	0.227248
P43277	Hist1h1d	______________MSETAPAAPAAPAPVEK	_(ac)S(ph)ETAPAAPAAPAPVEK_	1.1851	-0.93751	1.47138	0.0625964	0.623848		S	2	2	___1	0.998106	UID2594	0.478713	-0.478708	-0.750445	-0.0774521
P45591	Cfl2	_____________MASGVTVNDEVIKVFNDM	_(ac)AS(ph)GVTVNDEVIK_	-0.528736	0.576417	-2.21647	0.782195	0.0238405		S	3	2	___1	1	UID2597	-0.251178	0.295958	1.01514	-0.400225
P46467	Vps4b	VKEEQSGPVDEKGNDSDGEAESDDPEKKKLQ	_GNDS(ph)DGEAESDDPEK_	-0.121923	-0.481463	-0.78464	-0.859287	-0.633051		S	102	2	___1	1	UID2599	-0.077924	-0.245352	0.32964	0.336055
P46935	Nedd4	MQLQAQRAFTTRRQISEDVDGPDNRESPENW	_RQIS(ph)EDVDGPDNR_	0.912879	2.19271	-0.256877	3.95477	1.55279		S	309	2	___1	1	UID2602	0.362778	1.123	0.0769695	-1.82327
P46938	Yap1;Yap1;Yap1;Yap1;Yap1	AGTAGALTPQHVRAHSSPASLQLGAVSPGTL	_AHS(ph)SPASLQLGAVSPGTLTASGVVSGPAAAPAAQHLR_	-8.90043	NaN	-3.91988	-3.02268	-3.91988	Down	S	112	3	___1	0.951543	UID2604	-3.81652	NaN	1.83066	1.30644
P46938	Yap1;Yap1;Yap1;Yap1	PAPPAGHQVVHVRGDSETDLEALFNAVMNPK	_GDS(ph)ETDLEALFNAVM(ox)NPK_	-5.24547	NaN	-5.388	-5.55224	-5.388	Down	S	46	2	___1	0.95969	UID2605	-2.25994	NaN	2.53354	2.44106
P46938	Yap1;Yap1;Yap1;Yap1;Yap1	PRLDPRFAMNQRITQSAPVKQPPPLAPQSPQ	_ITQS(ph)APVK_	-5.39423	-4.22926	-5.55479	-5.43455	-5.41439	Down	S	261	2	___1	1	UID2606	-2.3233	-2.16307	2.61339	2.38827
P46938	Yap1;Yap1;Yap1;Yap1	SFFKPPEPKSHSRQASTDAGTAGALTPQHVR	_QAS(ph)TDAGTAGALTPQHVR_	-7.70068	-4.70309	-7.89501	-6.66358	-7.18213	Down	S	94	2	___1	0.999595	UID2607	-3.30557	-2.40553	3.73379	2.93955
P47713	Pla2g4a;Pla2g4a	IVESIEYRRQNPSRCSVSLSNVEARKFFNKE	_CS(ph)VSLSNVEAR_	-1.43125	0.128868	-3.04738	0.208035	-0.651191		S	726	2	___1	0.999999	UID2611	-0.63554	0.0669503	1.41294	-0.142688
P47713	Pla2g4a;Pla2g4a	ENITAKHIVSNDSSDSDDEAQGPKGTENEEA	_HIVSNDS(ph)S(ph)DS(ph)DDEAQGPK_	1.04261	1.31241	-0.158734	2.65983	1.17751		S	437	2	___1	1	UID2615	0.418028	0.672561	0.0299829	-1.24243
P47856	Gfpt1	RGKDKKGSCGLSRVDSTTCLFPVEEKAVEYY	_VDS(ph)TTCLFPVEEK_	1.76893	1.02044	1.88652	0.705274	1.39468		S	259	2	___1	0.998079	UID2618	0.727354	0.523161	-0.949199	-0.365723
P47911	Rpl6	APDTKEKKPAAKKAGSDAAASRPRAAKVAKK	_KAGS(ph)DAAASRPR_	-2.42807	-0.883267	-1.93915	-1.08959	-1.51437		S	21	3	___1	0.999947	UID2619	-1.06007	-0.450952	0.882369	0.439357
P47930	Fosl2	TIGTTVGRRRRDEQLSPEEEEKRRIRRERNK	_RDEQLS(ph)PEEEEK_	-0.113067	1.62329	0.702549	1.56705	1.1348		S	120	2	___1	1	UID2620	-0.0741525	0.831634	-0.382363	-0.752267
P47930	Fosl2	VAHGPVCKISPEERRSPPTSGLQSLRGTGSA	_S(ph)PPTSGLQSLR_	1.06157	0.518411	1.49837	1.4642	1.26288		S	200	2	___1	1	UID2621	0.426104	0.266277	-0.763367	-0.706135
P47963	Rpl13;Rpl13-ps3	ARTIGISVDPRRRNKSTESLQANVQRLKEYR	_NKS(ph)TESLQANVQR_	-1.43841	NaN	-1.61609	-0.888456	-1.43841		S	106	2	___1	0.999444	UID2624	-0.638591	NaN	0.727703	0.349139
P48024	Eif1;Gm6900;Gm16378	______________MSAIQNLHSFDPFADAS	_(ac)S(ph)AIQNLHSFDPFADASK_	0.62346	1.73632	NaN	1.76047	1.73632		S	2	2	___1	0.999934	UID2625	0.23952	0.889473	#VALUE!	-0.839028
P48678	Lmna	LSPSPTSQRSRGRASSHSSQSQGGGSVTKKR	_ASS(ph)HSSQSQGGGSVTK_	-1.05846	-0.698778	NaN	-0.684409	-0.698778		S	404	2	___1	0.957077	UID2627	-0.476779	-0.35655	#VALUE!	0.257614
P48678	Lmna	DDDEDGEELLHHHRGSHCSGSGDPAEYNLRS	_GS(ph)HCS(ph)GSGDPAEYNLR_	-0.265402	-2.11338	-0.157258	-1.2259	-0.745651		S	570	2	___1	1	UID2629	-0.139029	-1.08039	0.0292761	0.500496
P48678	Lmna	EDGEELLHHHRGSHCSGSGDPAEYNLRSRTV	_GS(ph)HCS(ph)GSGDPAEYNLR_	-0.18133	-2.39999	-0.00488048	-1.5418	-0.861565		S	573	2	___1	0.999869	UID2630	-0.103224	-1.22705	-0.0436757	0.642193
P48678	Lmna	GEELLHHHRGSHCSGSGDPAEYNLRSRTVLC	_GSHCSGS(ph)GDPAEYNLR_	0.133772	-1.80622	0.129553	-1.58153	-0.725989		S	575	2	___1	0.986555	UID2631	0.0309717	-0.923222	-0.108037	0.660016
P48678	Lmna	GAAHEELQQSRIRIDSLSAQLSQLQKQLAAK	_IDS(ph)LSAQLSQLQK_	-0.934195	-1.61588	-1.71683	-0.467398	-1.27504		S	301	2	___1	0.999996	UID2632	-0.423855	-0.825824	0.775935	0.160275
P48678	Lmna;Lmna	SLETENAGLRLRITESEEVVSREVSGIKAAY	_ITES(ph)EEVVSR_	0.629194	0.907761	-0.191902	2.3724	0.768478		S	66	2	___1	0.999996	UID2633	0.241962	0.465504	0.0458623	-1.1135
P48678	Lmna	AYRKLLEGEEERLRLSPSPTSQRSRGRASSH	_LRLS(ph)PS(ph)PTSQR_	0.107477	2.02895	0.615938	3.20142	1.32244		S	390	2	___1	0.999986	UID2634	0.0197731	1.03921	-0.340897	-1.48536
P48678	Lmna	RKLLEGEEERLRLSPSPTSQRSRGRASSHSS	_LRLS(ph)PS(ph)PTSQR_	0.32552	2.24186	0.914979	2.33428	1.57842		S	392	3	___1	0.99977	UID2635	0.112633	1.14815	-0.484066	-1.09641
P48678	Lmna	LEGEEERLRLSPSPTSQRSRGRASSHSSQSQ	_LRLS(ph)PSPTS(ph)QR_	0.819669	0.386435	1.06769	2.89876	0.94368		S	395	2	___1	0.97339	UID2636	0.323082	0.198746	-0.557179	-1.3496
P48678	Lmna	EEVDEEGKFVRLRNKSNEDQSMGNWQIRRQN	_NKS(ph)NEDQSM(ox)GNWQIR_	0.808548	-0.130109	0.393487	0.125483	0.259485		S	458	2	___1	1	UID2637	0.318346	-0.0655666	-0.234397	-0.10566
P48678	Lmna	EGKFVRLRNKSNEDQSMGNWQIRRQNGDDPL	_NKSNEDQS(ph)MGNWQIR_	0.839378	-0.157058	-0.0656696	NaN	-0.0656696		S	463	3	___1	0.910056	UID2638	0.331476	-0.0793561	-0.0145724	#VALUE!
P48678	Lmna;Lmna	____METPSQRRATRSGAQASSTPLSPTRIT	_S(ph)GAQASSTPLSPTR_	3.05836	0.622204	1.46454	0.783129	1.12383		S	12	2	___1	1	UID2639	1.2765	0.319387	-0.747173	-0.400644
P48678	Lmna;Lmna	ETPSQRRATRSGAQASSTPLSPTRITRLQEK	_SGAQAS(ph)STPLSPTR_	1.51228	0.464687	2.00646	0.342134	0.988484		S	17	2	___1	0.990405	UID2640	0.618051	0.238787	-1.00662	-0.202838
P48678	Lmna;Lmna	RRATRSGAQASSTPLSPTRITRLQEKEDLQE	_SGAQASSTPLS(ph)PTR_	0.403569	NaN	0.596953	2.72758	0.596953		S	22	2	___1	0.983992	UID2641	0.145873	NaN	-0.331808	-1.27282
P48678	Lmna	SGSSASSVTVTRSFRSVGGSGGGSFGDNLVT	_S(ph)VGGSGGGSFGDNLVTR_	1.1386	1.69755	0.9082	1.61068	1.37464		S	629	2	___1	0.999984	UID2642	0.458907	0.869635	-0.48082	-0.77184
P48678	Lmna	ASSVTVTRSFRSVGGSGGGSFGDNLVTRSYL	_SVGGS(ph)GGGSFGDNLVTR_	1.0388	1.85348	0.718578	1.42804	1.23342		S	633	2	___1	0.998534	UID2643	0.416407	0.949423	-0.390037	-0.689916
P48754	Brca1	AKKNEPNEHIRKRRASDAFPEEKLMNKAGLL	_RAS(ph)DAFPEEK_	-0.0254813	-0.142292	NaN	-1.69217	-0.142292		S	686	2	___1	1	UID2645	-0.0368514	-0.0718003	#VALUE!	0.709644
Q5EBP8	Hnrnpa1;Hnrnpa1	____________MSKSESPKEPEQLRKLFIG	_(ac)SKS(ph)ES(ph)PKEPEQLR_	-0.509439	-0.523146	-0.941616	0.358947	-0.516293		S	4	2	___1	0.991128	UID2649	-0.24296	-0.26668	0.404794	-0.210379
Q5EBP8	Hnrnpa1;Hnrnpa1	__________MSKSESPKEPEQLRKLFIGGL	_SES(ph)PKEPEQLR_	-0.747179	-0.947941	-1.13341	-1.07032	-1.00913		S	6	2	___1	0.999965	UID2650	-0.344209	-0.484045	0.496616	0.430714
Q5EBP8	Hnrnpa1;Hnrnpa1	______________MSKSESPKEPEQLRKLF	_(ac)S(ph)KSESPKEPEQLR_	1.25511	2.0011	0.686096	1.61871	1.43691		S	2	2	___1	0.999196	UID2651	0.50853	1.02496	-0.374486	-0.775441
P49452	Cenpc1	VMIPSKDRHLSAHKPSPENTALLQGKKSREK	_HLSAHKPS(ph)PENTALLQGK_	-0.608159	-1.281	-0.331648	NaN	-0.608159		S	302	3	___1	0.985915	UID2653	-0.285003	-0.654467	0.112767	#VALUE!
P49452	Cenpc1	NMVPDKKLHHKLVLPSNSPNVRRSNRIRLKP	_LVLPS(ph)NSPNVR_	NaN	-1.22284	-0.833163	-1.91571	-1.22284		S	697	2	___1	0.985072	UID2654	NaN	-0.62471	0.352871	0.809908
P49452	Cenpc1	VPDKKLHHKLVLPSNSPNVRRSNRIRLKPLE	_LVLPSNS(ph)PNVR_	-0.924303	-1.15995	-0.589759	-1.69217	-1.04213		S	699	2	___1	0.999935	UID2655	-0.419642	-0.592528	0.23634	0.709644
P49452	Cenpc1	SRPKRGCKYRNNVMTSPNVHLKSHTEEYTSK	_NNVMTS(ph)PNVHLK_	-0.965239	NaN	-0.330812	-1.80465	-0.965239		S	612	2	___1	0.999462	UID2656	-0.437076	NaN	0.112367	0.760093
P50580	Pa2g4;Pa2g4	______________MSGEDEQQEQTIAEDLV	_(ac)S(ph)GEDEQQEQTIAEDLVVTK_	0.230197	-0.609175	-0.123405	-1.20354	-0.36629		S	2	2	___1	1	UID2658	0.0720372	-0.310701	0.0130691	0.490467
P51125	Cast;Cast	KVVGKKKEQKPFTPASPVQSTPSKPSDKSGM	_EQKPFTPAS(ph)PVQSTPSK_	0.0981083	-0.622354	-0.326348	0.642482	-0.11412		S	204	2	___1	0.999987	UID2659	0.0157831	-0.317445	0.11023	-0.337558
P51125	Cast	_____MSQPGPKPAASPRPSRGAAARHTQEH	_(ac)SQPGPKPAAS(ph)PR_	3.78559	NaN	4.4696	1.54604	3.78559		S	11	2	___1	1	UID2662	1.58621	NaN	-2.18587	-0.742845
P51150	Rab7a	VTMQIWDTAGQERFQSLGVAFYRGADCCVLV	_FQS(ph)LGVAFYR_	NaN	-3.83974	-1.42723	-1.51094	-1.51094		S	72	2	___1	1	UID2663	NaN	-1.96376	0.637286	0.628354
P51432	Plcb3	GEEVGLEKTSLEPQKSLGEESLSREPNVPMP	_S(ph)LGEESLSR_	0.822375	-0.250026	NaN	-0.236535	-0.236535		S	537	2	___1	1	UID2664	0.324235	-0.126927	#VALUE!	0.0567222
P51660	Hsd17b4	GGIVEVLHKVDSEGISPNRTSHAAPAATSGF	_VDSEGIS(ph)PNR_	-2.60807	-2.83818	-0.0393459	1.24932	-1.32371		S	308	2	___1	0.999999	UID2666	-1.13673	-1.45127	-0.0271751	-0.609751
P51859	Hdgf;Hdgf	EKGTLKRRAGDVLEDSPKRPKESGDHEEEDK	_RAGDVLEDS(ph)PK_	-0.495796	-0.750878	-0.515433	-0.528974	-0.522204		S	165	2	___1	1	UID2667	-0.237149	-0.383209	0.200755	0.187894
P51859	Hdgf;Hdgf	AHEGDGDKKGSAEGSSDEEGKLVIDEPAKEK	_KGS(ph)AEGS(ph)S(ph)DEEGKLVIDEPAK_	-1.06517	-2.11768	-0.990385	0.0793029	-1.02778		S	133	3	___1	1	UID2670	-0.479633	-1.08259	0.428142	-0.0849457
P52293	Kpna2;Kpna2;Kpna2;Kpna2;Kpna2;Kpna2	MLKRRNVSSFPDDATSPLQENRNNQGTVNWS	_NVSSFPDDATS(ph)PLQENR_	-1.2868	NaN	-0.143051	1.00544	-0.143051		S	62	2	___1	0.998316	UID2673	-0.574025	NaN	0.0224744	-0.500361
P52479-2	Usp10	KPSASSPMAYVETKCSPPVPSPLASEKQMEV	_CS(ph)PPVPSPLASEK_	0.712939	-0.661197	0.689536	-1.00524	0.0141695		S	360	2	___1	1	UID2674	0.277628	-0.337321	-0.376133	0.401521
P52479-2	Usp10;Usp10	LNGLHEEMLSLKKLLSPTHEKHSVSNGPRSD	_LLS(ph)PTHEK_	-1.71276	-2.65672	-2.27421	-2.55125	-2.41273	Down	S	542	2	___1	0.999949	UID2675	-0.75543	-1.35842	1.04278	1.09498
P52795	Efnb1	RKRHRKHTQQRAAALSLSTLASPKGGSGTAG	_AAALS(ph)LSTLASPK_	6.55677	7.77493	5.54178	NaN	6.55677	Up	S	280	2	___1	0.999811	UID2680	2.7664	3.97939	-2.69919	#VALUE!
P52927	Hmga2	QKKPAQETEETSSQESAEED___________	_KPAQETEETSS(ph)QES(ph)AEED_	-1.0654	0.105082	-2.38704	3.20529	-0.480159		S	104	2	___1	1	UID2686	-0.479734	0.054779	1.0968	-1.4871
P52927	Hmga2;Hmga2	RGRPRKQQQEPTCEPSPKRPRGRPKGSKNKS	_KQQQEPTCEPS(ph)PK_	-1.24884	0.365228	-2.64402	1.936	-0.441806		S	44	2	___1	1	UID2687	-0.557858	0.187894	1.21983	-0.917761
P53986	Slc16a1	KAEEKQKREGKEDEASTDVDEKPKETMKAAQ	_EGKEDEAS(ph)T(ph)DVDEKPK_	0.670476	-0.437327	3.16633	0.241729	0.456102		S	461	2	___1	1	UID2691	0.259544	-0.222768	-1.56192	-0.157801
P53986	Slc16a1	MRPIGPEQVKLEKLKSKESLQEAGKSDANTD	_LKS(ph)KES(ph)LQEAGK_	3.11878	1.24238	2.82359	1.73012	2.27685		S	210	2	___1	1	UID2692	1.30223	0.636729	-1.39783	-0.825415
P53986	Slc16a1	IGPEQVKLEKLKSKESLQEAGKSDANTDLIG	_LKS(ph)KES(ph)LQEAGK_	-0.17083	-1.23351	3.12068	-2.00634	-0.70217		S	213	2	___1	1	UID2693	-0.0987527	-0.630171	-1.54006	0.850559
P53995	Anapc1;Anapc1	RSPSISNMAALSRAHSPALGVHSFSGAQRFN	_AHS(ph)PALGVHSFSGAQR_	1.60051	0.962961	1.88966	1.222	1.41126		S	355	3	___1	1	UID2694	0.655627	0.49375	-0.950704	-0.597496
P53995	Anapc1	GHRRFQTGMHREKHKSPSYQIKEGDTINVDV	_HKS(ph)PSYQIK_	0.235028	1.37417	0.837175	NaN	0.837175		S	1347	3	___1	0.999977	UID2695	0.0740944	0.704164	-0.446817	#VALUE!
P53995	Anapc1;Anapc1	DRLAWTRSFDFEGSLSPVIAPKKARPSDTGS	_SFDFEGSLS(ph)PVIAPK_	-0.491766	-0.103182	-0.903824	1.17321	-0.297474		S	688	2	___1	0.994277	UID2697	-0.235433	-0.0517879	0.386701	-0.575615
P53995	Anapc1;Anapc1	NSEYHRNVESHLLNKSLCLTALEVSNAKDED	_S(ph)LCLTALEVSNAK_	0.69332	4.00307	2.17006	4.15287	3.08657	Up	S	727	2	___1	0.999996	UID2698	0.269273	2.04935	-1.08495	-1.91213
P53995	Anapc1;Anapc1	SCVSDETCQYLSKVTSTPQKPQAEQEENRFT	_VTS(ph)TPQKPQAEQEENR_	-0.162823	0.330111	0.199901	NaN	0.199901		S	901	2	___1	0.964445	UID2699	-0.0953425	0.169925	-0.141717	#VALUE!
P54103	Dnajc2;Dnajc2;Dnajc2	GRWFEAFVKRRNRNASTSFQELEDKKELSEE	_NAS(ph)TS(ph)FQELEDKK_	-1.16677	-1.00595	-1.91897	-0.883908	-1.08636		S	47	2	___1	0.999992	UID2700	-0.522903	-0.513728	0.872711	0.347099
P54103	Dnajc2;Dnajc2;Dnajc2	WFEAFVKRRNRNASTSFQELEDKKELSEESE	_NAS(ph)TS(ph)FQELEDK_	-1.44786	-0.584281	-0.307585	1.16216	-0.445933		S	49	2	___1	0.999832	UID2701	-0.642617	-0.297963	0.101247	-0.570657
P54116	Stom	LAQTTLRNALGTKNLSQILSDREEIAHHMQS	_NLS(ph)QILSDR_	-0.566196	0.4245	-1.68677	-0.357018	-0.461607		S	161	2	___1	1	UID2702	-0.267132	0.218223	0.761541	0.110764
P54227	Stmn1;Stmn1;Stmn1	MASSDIQVKELEKRASGQAFELILSPRSKES	_RAS(ph)GQAFELILS(ph)PR_	2.4931	4.3529	1.17649	3.20962	2.85136	Up	S	16	2	___1	1	UID2703	1.03576	2.22836	-0.609266	-1.48904
P54227	Stmn1;Stmn1;Stmn1	ELEKRASGQAFELILSPRSKESVPDFPLSPP	_RAS(ph)GQAFELILS(ph)PR_	-1.15438	1.0271	-1.73613	0.548126	-0.303127		S	25	2	___1	1	UID2704	-0.517627	0.52657	0.785174	-0.295234
P54227	Stmn1;Stmn1;Stmn1;Stmn2	SEAPRTLASPKKKDLSLEEIQKKLEAAEERR;SVPDFPLSPPKKKDLSLEEIQKKLEAAEERR	_DLS(ph)LEEIQK_	2.88993	1.00805	1.90256	4.16464	2.39624		S	46	2	___1	1	UID2705	1.20477	0.516822	-0.95688	-1.91741
P54227	Stmn1;Stmn1;Stmn1	ILSPRSKESVPDFPLSPPKKKDLSLEEIQKK	_SKESVPDFPLS(ph)PPK_	0.625754	3.64157	0.535758	3.07212	1.84894		S	38	2	___1	1	UID2706	0.240497	1.86437	-0.302511	-1.42736
P54276	Msh6	LPDLERLLSKIHNVGSPLKSQNHPDSRAIMY	_IHNVGS(ph)PLK_	-0.13877	-0.73833	-0.709127	-1.07437	-0.723728		S	827	2	___1	1	UID2707	-0.0850988	-0.376789	0.293488	0.432532
P54276	Msh6	KKGKSVRVHVQFFDDSPTRGWVSKRMLKPYT	_VHVQFFDDS(ph)PTR_	NaN	-0.678527	-0.344163	-0.578568	-0.578568		S	137	2	___1	0.999294	UID2709	NaN	-0.346188	0.118758	0.21014
P54731	Faf1	EENAEPVSKLRIRTPSGEFLERRFLASNKLQ	_TPS(ph)GEFLER_	0.169065	-0.00583826	-0.689146	0.218348	0.0816134		S	581	2	___1	0.999999	UID2710	0.0460021	-0.00197787	0.283922	-0.147314
P55041	Gem;Rrad;Rrad	VAKNNKNMAFKLKSKSCHDLSVL________;VARNSRKMAFRAKSKSCHDLSVL________	_S(ph)CHDLSVL_	5.00675	4.5875	5.38506	5.40358	5.1959	Up	S	300	2	___1	0.999969	UID2711	2.10628	2.3484	-2.62415	-2.47313
P55041	Gem;Rrad;Rrad	KIVAKNNKNMAFKLKSKSCHDLSVL______;RIVARNSRKMAFRAKSKSCHDLSVL______	_S(ph)KSCHDLSVL_	5.13376	4.66219	NaN	5.17575	5.13376	Up	S	298	2	___1	0.983488	UID2712	2.16037	2.38662	#VALUE!	-2.37094
P55041	Gem	TMRQGTVGMQPQQRWSIPADARHLMVQKDPH	_WS(ph)IPADAR_	2.09763	2.44171	2.46378	4.00848	2.45275	Up	S	22	2	___1	1	UID2713	0.867343	1.25042	-1.22557	-1.84736
P55200	Mll	DLTRNSGTPGLQVPVSPTVPVQNQKYVPSST	_NSGTPGLQVPVS(ph)PTVPVQNQK_	0.146678	-0.533918	-0.290118	0.0313898	-0.129364		S	3032	2	___1	0.992705	UID2715	0.0364681	-0.272193	0.0928839	-0.0634545
P55258	Rab8a	ARDIKAKMDKKLEGNSPQGSSHGVKITVEQQ	_LEGNS(ph)PQGSSHGVK_	0.321131	-0.768251	-0.359112	NaN	-0.359112		S	181	2	___1	0.999633	UID2716	0.110764	-0.392099	0.125916	#VALUE!
P55258	Rab8a	FDNIRNWIRNIEEHASADVEKMILGNKCDVN	_NIEEHAS(ph)ADVEK_	-4.40755	-6.23298	-6.80056	-6.94719	-6.51677	Down	S	111	2	___1	1	UID2718	-1.90309	-3.18836	3.20981	3.06676
P55288	Cdh11	QNWGPRFKKLADLYGSKDTFDDDS_______	_LADLYGS(ph)K_	-0.514654	-1.51968	0.840668	-2.40225	-1.01717		S	788	2	___1	1	UID2719	-0.245181	-0.776602	-0.448489	1.02814
P56183	Rrp1	KKRLPKPQPQNKEAGSEAESSSADPGPGRKR	_EAGS(ph)EAESSSADPGPGR_	-0.446604	0.795922	-0.0587516	-0.138895	-0.0988233		S	434	2	___1	1	UID2721	-0.2162	0.408277	-0.0178844	0.0129261
E9Q827	Arpp19;Arpp19;Arpp19;Arpp19	GDHIPTPQDLPQRKPSLVASKLAG_______	_KPS(ph)LVASK_	-4.96024	-3.79749	-4.96607	-0.834989	-4.37886	Down	S	137	2	___1	1	UID2722	-2.13847	-1.94214	2.33153	0.325156
E9Q827	Arpp19;Arpp19	AASAEEQKEMEDKVTSPEKAEEAKLKARYPH	_VTS(ph)PEKAEEAK_	-1.72674	NaN	-0.571542	0.127248	-0.571542		S	56	2	___1	0.996227	UID2723	-0.761384	NaN	0.227618	-0.106451
E9Q827	Arpp19;Arpp19;Arpp19;Ensa	DFLMKRLQKGQKYFDSGDYNMAKAKMKNKQL;DFLRKRLQKGQKYFDSGDYNMAKAKMKNKQL	_YFDS(ph)GDYNMAK_	1.65363	0.707881	1.87108	0.324671	1.18076		S	95	2	___1	1	UID2724	0.678252	0.363227	-0.941808	-0.195005
P56695	Wfs1;Wfs1;Wfs1	VKLLRRCLADRKGITSENEAEVKQLSSETDL	_GITS(ph)ENEAEVK_	2.79333	2.28591	2.18473	3.08669	2.53962	Up	S	158	2	___1	0.978819	UID2725	1.16363	1.17069	-1.09197	-1.4339
P56695	Wfs1;Wfs1	PAPQPQARARLNATASLEQDKIEPPRAPRPQ	_LNATAS(ph)LEQDKIEPPR_	-0.542917	NaN	0.526667	3.84489	0.526667		S	32	3	___1	0.877663	UID2726	-0.257218	NaN	-0.298158	-1.77398
P57784	Snrpa1	KGKRGAQLAKDIARRSKTFNPGAGLPTDKKK	_S(ph)KTFNPGAGLPTDK_	0.134435	2.3111	-0.511235	NaN	0.134435		S	178	2	___1	0.971654	UID2728	0.0312541	1.18358	0.198746	#VALUE!
P58252	Eef2	TFEHAHNMRVMKFSVSPVVRVAVEAKNPADL	_FSVS(ph)PVVR_	-3.21251	-4.75586	-3.37518	-2.47908	-3.29385	Down	S	502	2	___1	1	UID2729	-1.39415	-2.43253	1.56988	1.06261
P58404	Strn4	ELNGAGEPVEGAPRASPGPGGLSGGESLLVK	_AS(ph)PGPGGLSGGESLLVK_	1.47276	0.661916	1.30429	1.20302	1.25365		S	223	2	___1	1	UID2730	0.601221	0.339707	-0.670452	-0.588986
P58468	Fam207a	APGPVPRAVEPALPQSPAGGAGAKDWTFVHN	_AVEPALPQS(ph)PAGGAGAK_	-0.532326	-1.33241	-0.202974	0.0844585	-0.36765		S	38	2	___1	1	UID2732	-0.252707	-0.680775	0.0511633	-0.0872582
P58801	Ripk2	IVSVPPGAAFCDRRASSCSLAVISPFLVEKG	_RAS(ph)SCSLAVISPFLVEK_	-1.31211	-0.249072	0.489072	NaN	-0.249072		S	411	2	___1	0.97111	UID2734	-0.584804	-0.126439	-0.28016	#VALUE!
Q5SPX8	Tbc1d10a;Tbc1d10a	AILDAEPGPRPALQPSPSIRLPPDAALLSSK	_AILDAEPGPRPALQPS(ph)PSIR_	2.74551	1.86223	2.22841	2.54105	2.38473	Up	S	441	3	___1	0.99067	UID2735	1.14326	0.953898	-1.11288	-1.18915
P58871	Tnks1bp1	TRDASLQDWEFGKRASVSTNQDTDENDQELG	_RAS(ph)VSTNQDTDENDQELGMK_	-1.99168	NaN	-2.532	-0.125159	-1.99168		S	887	3	___1	0.875102	UID2736	-0.874217	NaN	1.1662	0.00676469
P58871	Tnks1bp1	GISLPQRDDGESQPRSPALLPSTVEGPPGAP	_S(ph)PALLPSTVEGPPGAPLLQAK_	-0.784669	-0.00973704	-0.138003	-0.608181	-0.373092		S	568	2	___1	1	UID2738	-0.360175	-0.00397285	0.0200577	0.223423
P58871	Tnks1bp1	GSARRAAGAELKDRQSPSTCSEGLLGWAQKD	_DRQS(ph)PSTCSEGLLGWAQK_	-0.0134093	0.569749	0.0855116	0.0428036	0.0641576		S	713	2	___1	0.999952	UID2739	-0.0317102	0.292546	-0.0869516	-0.0685741
P58871	Tnks1bp1	ARRAAGAELKDRQSPSTCSEGLLGWAQKDLQ	_DRQSPS(ph)TCSEGLLGWAQK_	0.471768	0.658795	NaN	-0.0279527	0.471768		S	715	3	___1	0.78893	UID2740	0.174918	0.338111	#VALUE!	-0.0368366
P58871	Tnks1bp1	IHDKELQDQEFGKRDSLGSFSTRDASLQDWE	_DS(ph)LGSFSTR_	0.142713	0.876965	-0.19161	0.087501	0.115107		S	866	2	___1	1	UID2742	0.0347792	0.449746	0.0457225	-0.088623
P58871	Tnks1bp1	RDVGHLEEGASGGLLSPSTPHSRDGAARPKD	_DVGHLEEGASGGLLS(ph)PSTPHSR_	NaN	0.304937	-2.08014	-0.837299	-0.837299		S	1022	3	___1	0.962975	UID2743	NaN	0.157044	0.949871	0.326192
P58871	Tnks1bp1	EEPRSLGVGEKDWTSSVEARNRDLPGQAEVG	_DWTSS(ph)VEAR_	0.432228	NaN	0.264688	0.820798	0.432228		S	1223	2	___1	0.921289	UID2745	0.158078	NaN	-0.172734	-0.41754
P58871	Tnks1bp1	EILAKMEQPRKEILASPDRLWGSRLTFNHDG	_KEILAS(ph)PDR_	-0.323189	1.28843	0.273055	0.25734	0.265197		S	178	2	___1	1	UID2746	-0.16364	0.66029	-0.17674	-0.164804
P58871	Tnks1bp1	GHTESRPSSLAQRRFSEGVLQPPSQDQEKLG	_RFS(ph)EGVLQPPSQDQEK_	-3.69615	-3.087	-3.32193	-1.99006	-3.20446	Down	S	429	2	___1	1	UID2747	-1.60012	-1.57859	1.54439	0.84326
P58871	Tnks1bp1	EGVSQVGPGTPPAPESPRKPISGVQGNDPGI	_GEGVSQVGPGT(ph)PPAPES(ph)PR_	0.159536	0.436351	0.931589	-0.290202	0.297944		S	539	2	___1	1	UID2749	0.0419438	0.224287	-0.492018	0.0807941
P58871	Tnks1bp1	QGSGEGSTREWASRHSLGQEVIGIGGSQDES	_HS(ph)LGQEVIGIGGSQDESEVPVR_	-0.389206	0.947903	NaN	-0.194828	-0.194828		S	796	3	___1	1	UID2751	-0.191755	0.486045	#VALUE!	0.0380147
P58871	Tnks1bp1	GSTSAVRLANISVPASESPRLSSRPSSPCHS	_LANISVPAS(ph)ESPR_	1.05854	1.1476	2.0588	1.14877	1.14819		S	298	2	___1	0.965191	UID2753	0.424815	0.588229	-1.03168	-0.564649
P58871	Tnks1bp1	EKLGGSLATLPQGQGSQSALDRPFGSGTESN	_LGGSLATLPQGQGS(ph)QSALDR_	-2.32826	-1.36756	-2.42693	-0.378689	-1.84791		S	456	2	___1	0.998789	UID2755	-1.01756	-0.698764	1.1159	0.120485
P58871	Tnks1bp1	SSQEITRLQGRMQAESQSPTNVDLEDKEREQ	_MQAES(ph)QSPTNVDLEDKER_	-0.413592	0.422075	-0.90797	NaN	-0.413592		S	1061	2	___1	0.97376	UID2756	-0.20214	0.216982	0.388685	#VALUE!
P58871	Tnks1bp1	QEITRLQGRMQAESQSPTNVDLEDKEREQRG	_MQAESQS(ph)PTNVDLEDK_	-0.654119	0.371163	-0.800424	0.142033	-0.256043		S	1063	2	___1	0.999006	UID2757	-0.304576	0.190931	0.337197	-0.113083
P58871	Tnks1bp1	TPDLGLRNMAPGAGCSPGEPRELGVGQVDWG	_NMAPGAGCS(ph)PGEPR_	-0.28752	1.04174	-0.262014	-0.0688698	-0.165442		S	1290	2	___1	1	UID2759	-0.148449	0.534062	0.0794292	-0.0184834
P58871	Tnks1bp1	LSPSALKAKLRSRNRSAEEGEVTESKSSQKE	_S(ph)AEEGEVTESK_	0.544207	0.631452	0.272749	0.346839	0.445523		S	1657	2	___1	1	UID2760	0.205768	0.324119	-0.176593	-0.204948
P58871	Tnks1bp1	GNDRVSGAGLSPSRKSGGGHFVPPGETKAGA	_S(ph)GGGHFVPPGETK_	0.0937492	0.574809	0.874911	0.0691527	0.334279		S	1136	2	___1	1	UID2761	0.0139266	0.295135	-0.464883	-0.0803929
P58871	Tnks1bp1	EAPSLGASPSSCLTRSPPSGSQSLLEGIMTA	_S(ph)PPSGSQSLLEGIMTASSSK_	-0.83986	0.460862	-1.08475	-0.82599	-0.832925		S	1437	2	___1	0.99979	UID2762	-0.38368	0.236829	0.473319	0.32112
P58871	Tnks1bp1	SWSQDTSQNYSLGGRSPVGDTGLGKRDWSSK	_S(ph)PVGDTGLGK_	-0.183478	0.330612	-0.851278	-0.362969	-0.273224		S	763	2	___1	1	UID2764	-0.104139	0.170181	0.361544	0.113434
P58871	Tnks1bp1	VGPDLELDPKSSGSLSPGLETEDPLEARELG	_S(ph)SGSLS(ph)PGLETEDPLEAR_	-3.55928	-0.380102	NaN	1.05625	-0.380102		S	1375	2	___1	0.999928	UID2766	-1.54183	-0.193486	#VALUE!	-0.523152
P58871	Tnks1bp1	SLGTKGLKVNLFPGLSPSALKAKLRSRNRSA	_VNLFPGLS(ph)PSALK_	0.172345	2.29079	0.94433	1.43526	1.18979		S	1643	2	___1	0.999333	UID2767	0.0473989	1.17319	-0.498118	-0.693154
P58871	Tnks1bp1	RLFQDSTEPRASRVPSSDEEVVEEPQSRRTR	_VPS(ph)S(ph)DEEVVEEPQSR_	-0.0368295	-1.57741	0.749178	-0.935331	-0.48608		S	1611	2	___1	1	UID2768	-0.0416844	-0.80614	-0.404687	0.370164
P58871	Tnks1bp1	QFGIIGNDRVSGAGLSPSRKSGGGHFVPPGE	_VSGAGLS(ph)PSR_	-0.32133	0.362009	-0.413301	-0.670118	-0.367316		S	1131	2	___1	0.999761	UID2770	-0.162848	0.186247	0.151859	0.251204
P58871	Tnks1bp1	GIIGNDRVSGAGLSPSRKSGGGHFVPPGETK	_VSGAGLSPS(ph)RK_	0.123478	1.00075	-0.625866	NaN	0.123478		S	1133	2	___1	0.908151	UID2771	0.0265876	0.513086	0.253626	#VALUE!
P58871	Tnks1bp1	TGPESSSRWLDDLLASPPPNSGSARRAAGAE	_WLDDLLAS(ph)PPPNSGSAR_	-1.36258	0.996203	-0.55606	0.654739	0.0493395		S	692	2	___1	1	UID2772	-0.606298	0.510759	0.220206	-0.343055
P59178	L3mbtl2	VCVKEEHQDISSLDRSPSPQLPLPIESIKQE	_S(ph)PSPQLPLPIESIK_	-1.25059	-2.50748	-0.319361	-2.00616	-1.62838		S	685	2	___1	0.896561	UID2774	-0.558601	-1.28205	0.106884	0.850479
P59178	L3mbtl2	VKEEHQDISSLDRSPSPQLPLPIESIKQERN	_SPS(ph)PQLPLPIESIK_	-1.02609	-2.24251	-0.410316	-2.12265	-1.57437		S	687	2	___1	0.998757	UID2775	-0.462992	-1.14647	0.15043	0.90273
P59222	Scarf2	VSWIHGKHSAAAAAPSPPPAGRKAAPSPSGR	_HSAAAAAPS(ph)PPPAGR_	-0.721987	-6.06027	2.32846	-0.605425	-0.663706		S	672	2	___1	1	UID2776	-0.33348	-3.09999	-1.16078	0.222186
P59222	Scarf2	PARTRNEAGGLSLSPSPERRKPPPPDPATKP	_NEAGGLSLSPS(ph)PER_	-1.05328	-4.37423	-0.775033	-2.97895	-2.01612		S	640	2	___1	1	UID2778	-0.474573	-2.23725	0.325041	1.28682
P59325	Eif5	RRMDEISDHAKGLTLSDDLERTVEERVNILF	_GLTLS(ph)DDLER_	-0.215856	-0.0620711	-0.83835	-0.111363	-0.163609		S	227	2	___1	0.99955	UID2780	-0.117928	-0.0307518	0.355355	0.000576859
Q3UHP6	Anks1;Anks1a	TCSPTEDATMGSRSESLSNCSIGKKRLEKSP	_SES(ph)LSNCSIGK_	1.14844	-0.505866	0.03596	-0.604874	-0.234953		S	663	2	___1	0.999465	UID2781	0.463099	-0.257839	-0.0632283	0.221939
P60330	Espl1	LSRHLIRVLVGEGGSSPGPLSPQRALCLLEI	_VLVGEGGSS(ph)PGPLSPQR_	-2.61687	-2.2906	-3.39621	-0.767011	-2.45373	Down	S	239	2	___1	0.999108	UID2783	-1.14048	-1.17108	1.57995	0.294665
P60335	Pcbp1	QGRVMTIPYQPMPASSPVICAGGQDRCSDAA	_VM(ox)TIPYQPM(ox)PASS(ph)PVICAGGQDR_	NaN	-0.682113	-0.681711	-1.39032	-0.682113		S	190	3	___1	0.967812	UID2786	NaN	-0.348023	0.280362	0.574247
P60840	Ensa	GDHIPTPQDLPQRKSSLVTSKLAGGQVE___	_KSS(ph)LVTSK_	-3.50313	-2.85892	NaN	-0.0318766	-2.85892		S	109	2	___1	0.995792	UID2787	-1.51792	-1.46188	#VALUE!	-0.0350766
P60904	Dnajc5;Dnajc5;Dnajc5	______MADQRQRSLSTSGESLYHVLGLDKN	_SLS(ph)TSGESLYHVLGLDK_	1.96606	1.40207	0.795406	NaN	1.40207		S	10	3	___1	0.955155	UID2789	0.811307	0.718438	-0.426819	#VALUE!
P61327	Magoh;Magoh-rs1;Magohb;Magohb	VIGDEHISFTTSKIGSLIDVNQSKDPEGLRV	_IGS(ph)LIDVNQSK_	0.698095	0.469701	1.58523	-2.59492	0.583898		S	106	2	___1	1	UID2790	0.271306	0.241352	-0.804955	1.11457
P61406	Smg6	SRRSSERKKHLERNWSGCGEGEQKSNGKENR	_NWS(ph)GCGEGEQK_	1.45552	1.2145	1.52297	0.0981554	1.33501		S	331	2	___1	1	UID2791	0.59388	0.622462	-0.775145	-0.0934019
P62071	Rras2	LVRVIRKFQEQECPPSPEPTRKEKDKKGCHC	_KFQEQECPPS(ph)PEPTR_	0.890147	2.44798	-0.0266989	4.84062	1.66906		S	186	2	___1	1	UID2796	0.353097	1.25363	-0.0332299	-2.22061
P62242	Rps8;Gm11353	KIQKKYDERKKNAKISSLLEEQFQQGKLLAC	_IS(ph)SLLEEQFQQGK_	-0.583362	0.0892938	-0.90221	-0.739094	-0.661228		S	159	2	___1	0.818464	UID2797	-0.274442	0.0467006	0.385928	0.282143
P62242	Rps8;Gm11353	IQKKYDERKKNAKISSLLEEQFQQGKLLACI	_ISS(ph)LLEEQFQQGK_	-1.01383	-0.124273	-0.90221	-0.571609	-0.736909		S	160	2	___1	0.823432	UID2798	-0.457772	-0.0625803	0.385928	0.207018
P62264	Rps14	MKIGRIEDVTPIPSDSTRRKGGRRGRRL___	_IEDVTPIPSDS(ph)TR_	-1.30146	-2.19473	NaN	-1.60203	-1.60203		S	139	2	___1	0.930923	UID2799	-0.580267	-1.12202	#VALUE!	0.669208
P62484	Abi2	VPNDYVPSPTRNMAPSQQSPVRTASVNQRNR	_NM(ox)APS(ph)QQSPVR_	-4.9857	1.65652	1.70181	0.367406	1.01196		S	218	2	___1	0.976689	UID2800	-2.14931	0.848638	-0.860766	-0.214173
P62484	Abi2	DYVPSPTRNMAPSQQSPVRTASVNQRNRTYS	_NMAPSQQS(ph)PVR_	1.8432	1.13124	2.04878	1.70933	1.77626		S	221	2	___1	1	UID2801	0.758985	0.579856	-1.02688	-0.816088
P62702	Rps4x;Rps4y2	VHVKDANGNGFATRLSNIFVIGKGNKPWISL;VHVKDANGNSFATRLSNIFVIGKGNKPWISL	_LS(ph)NIFVIGK_	-0.317237	-0.94038	-0.165515	-0.992552	-0.628808		S	223	2	___1	1	UID2803	-0.161105	-0.480176	0.0332292	0.395831
P62806	Hist1h4a	PAIRRLARRGGVKRISGLIYEETRGVLKVFL	_RIS(ph)GLIYEETR_	0.842069	-0.0630795	-0.0376567	2.01685	0.402206		S	48	2	___1	1	UID2810	0.332622	-0.0312678	-0.0279838	-0.954026
P62908	Rps3;Rps3	EKVATRGLCAIAQAESLRYKLLGGLAVRRAC	_GLCAIAQAES(ph)LR_	-1.80046	NaN	-1.00647	0.193792	-1.00647		S	104	2	___1	1	UID2812	-0.792782	NaN	0.435842	-0.136299
P62960	Ybx1;Ybx1	RRRGPPRNYQQNYQNSESGEKNEGSESAPEG	_NYQQNYQNS(ph)ESGEK_	0.395292	-0.371539	1.22356	-0.728231	0.0118765		S	163	2	___1	0.99991	UID2817	0.142348	-0.189105	-0.631802	0.277271
P62996	Tra2b	__MSDSGEQNYGERESRSASRSGSAHGSGKS	_(ac)SDSGEQNYGERES(ph)R_	-0.170359	NaN	-0.421427	-0.300525	-0.300525		S	14	2	___1	1	UID2823	-0.0985519	NaN	0.155749	0.0854246
P63038	Hspd1	AKLSDGVAVLKVGGTSDVEVNEKKDRVTDAL	_VGGTS(ph)DVEVNEK_	-2.23152	NaN	-3.49595	-1.37776	-2.23152		S	410	2	___1	0.996906	UID2825	-0.976361	NaN	1.6277	0.568616
P63166	Sumo1	______________MSDQEAKPSTEDLGDKK	_(ac)S(ph)DQEAKPSTEDLGDKK_	-0.753248	-2.0061	-1.40526	-1.74523	-1.57525		S	2	2	___1	1	UID2826	-0.346793	-1.0255	0.626766	0.733441
P63166	Sumo1	_______MSDQEAKPSTEDLGDKKEGEYIKL	_(ac)SDQEAKPS(ph)TEDLGDKK_	-0.453892	-2.22007	-1.5143	-1.21451	-1.36441		S	9	3	___1	0.779763	UID2827	-0.219304	-1.13498	0.678973	0.495388
P63166	Sumo1	KKEGEYIKLKVIGQDSSEIHFKVKMTTHLKK	_VIGQDS(ph)SEIHFK_	NaN	-2.43245	-1.84416	-1.82434	-1.84416		S	31	2	___1	0.978539	UID2828	NaN	-1.24366	0.836894	0.768925
P63166	Sumo1	KEGEYIKLKVIGQDSSEIHFKVKMTTHLKKL	_VIGQDSS(ph)EIHFK_	NaN	-2.35592	-1.99004	-2.21957	-2.21957		S	32	3	___1	0.954327	UID2829	NaN	-1.2045	0.906737	0.946207
P63325	Rps10	AVPPGADKKAEAGAGSATEFQFRGGFGRGRG	_AEAGAGS(ph)ATEFQFR_	1.24008	1.32441	1.13196	0.347543	1.18602		S	146	2	___1	0.999853	UID2830	0.502127	0.678703	-0.587945	-0.205264
P68433	Hist1h3a;Hist1h3b	GKAPRKQLATKAARKSAPATGGVKKPHRYRP	_KS(ph)APATGGVK_	0.344267	2.17948	NaN	1.56542	1.56542		S	29	2	___1	0.999999	UID2833	0.120617	1.11623	#VALUE!	-0.751538
P70121	Zhx1	DESNVGSSKEEPGESSPGDETVAPKSGGTGK	_EEPGESS(ph)PGDETVAPK_	0.464258	0.791031	NaN	1.37386	0.791031		S	648	2	___1	0.837761	UID2835	0.171719	0.405775	#VALUE!	-0.665615
P70188	Kifap3	MLGERKECQKIIRLKSLNANTDITSLARKVV	_S(ph)LNANTDITSLAR_	-2.50349	-3.15795	-3.02055	-1.25532	-2.76202	Down	S	60	2	___1	1	UID2836	-1.09219	-1.61489	1.4001	0.513693
P70210	Tead3	______MASNSWTANSSPGEAREDGSEGLDK	_(ac)ASNSWTANS(ph)SPGEAR_	-0.524908	NaN	-1.26893	-1.3808	-1.26893		S	10	2	___1	0.990953	UID2839	-0.249548	NaN	0.561497	0.569977
P70210	Tead3	_____MASNSWTANSSPGEAREDGSEGLDKG	_(ac)ASNSWTANSS(ph)PGEAR_	-0.595841	-0.54634	-1.08171	-1.21428	-0.838775		S	11	2	___1	0.999348	UID2840	-0.279757	-0.278549	0.471864	0.495286
P70213	Fv1	SSTSLVTSEPVTRPKSLSDLTSQKHRHTNHE	_S(ph)LSDLTSQK_	0.947215	-1.11842	0.13765	1.32721	0.542433		S	244	2	___1	0.999956	UID2841	0.377401	-0.571279	-0.111913	-0.644691
P70227	Itpr3	KRRQRLGFVDVQNCMSR______________	_LGFVDVQNCMS(ph)R_	0.420062	-0.919807	-0.4644	-0.31444	-0.38942		S	2669	2	___1	1	UID2842	0.152897	-0.46965	0.176323	0.091666
P70255	Nfic	TSSSRNWTEDIEGGISSPVKKTEMDKSPFNS	_NWTEDIEGGIS(ph)SPVKK_	1.11187	1.87312	1.27119	0.738057	1.19153		S	313	3	___1	0.838753	UID2843	0.447526	0.959473	-0.654604	-0.380427
P70255	Nfic	SSSRNWTEDIEGGISSPVKKTEMDKSPFNSP	_NWTEDIEGGISS(ph)PVK_	1.60738	1.75997	1.44945	0.893836	1.52841		S	314	2	___1	0.999642	UID2844	0.658554	0.901572	-0.73995	-0.450301
P70255	Nfic	PVKKTEMDKSPFNSPSPQDSPRLSSFTQHHR	_SPFNSPS(ph)PQDSPR_	1.23386	0.179021	1.60976	0.348063	0.790961		S	330	2	___1	1	UID2845	0.499476	0.0926134	-0.816698	-0.205497
P70296	Pebp1;Pebp1;Pebp1	LGKVLTPTQVMNRPSSISWDGLDPGKLYTLV	_PSS(ph)ISWDGLDPGK_	NaN	-0.388918	0.59627	0.492099	0.492099		S	52	2	___1	0.99799	UID2850	NaN	-0.197997	-0.331481	-0.270104
P70302	Stim1	KKMMKDLEGLHRAEQSLHDLQERLHKAQEEH	_AEQS(ph)LHDLQER_	0.730499	-4.96544	-0.210236	-0.543061	-0.376648		S	257	2	___1	1	UID2851	0.285106	-2.53977	0.0546401	0.194213
P70302	Stim1	IEGVHPGSLVEKLPDSPALAKKTFMALNHGL	_LPDS(ph)PALAK_	4.70307	2.87215	5.47291	1.65927	3.78761	Up	S	575	2	___1	1	UID2854	1.97695	1.47067	-2.66621	-0.793632
P70302	Stim1	SSVRQRLTEPQLGLGSQRDLTHSDSESSLHM	_LTEPQLGLGS(ph)QR_	3.09825	1.24257	2.71404	1.30691	2.01048		S	512	2	___1	1	UID2855	1.29349	0.636822	-1.34538	-0.635585
P70336-2	Rock2;Rock2	ARSSPRTSMKIQQNQSIRRPSRQLAPNKP__	_IQQNQS(ph)IR_	2.59899	-0.166308	0.6702	-3.31296	0.251946		S	1431	2	___1	1	UID2857	1.08086	-0.0840891	-0.366876	1.43664
P70362	Ufd1l	DEAGGRFIAFSGEGQSLRKKGRKP_______	_FIAFSGEGQS(ph)LR_	2.20474	1.06906	1.60695	1.03428	1.338		S	299	2	___1	1	UID2858	0.912956	0.548042	-0.815351	-0.513296
P70362	Ufd1l	GNRLDGKKKGVEPSPSPIKPGDIKRGIPNYE	_GVEPSPS(ph)PIKPGDIK_	-0.46519	0.997785	1.13418	1.29166	1.06598		S	247	2	___1	0.999992	UID2860	-0.224115	0.511569	-0.589008	-0.628742
P70372	Elavl1	PNQNKNMALLSQLYHSPARRFGGPVHHQAQR	_NMALLSQLYHS(ph)PAR_	-1.10474	0.178757	-0.4785	-0.0383296	-0.258415		S	202	2	___1	1	UID2861	-0.496488	0.0924781	0.183074	-0.0321821
P70398	Usp9x;Usp9x;Usp9x	TGQRAQENYEGGEEVSPPQTKGSVKCTY___	_AQENYEGGEEVS(ph)PPQTK_	-1.83278	NaN	-3.45639	-2.77108	-2.77108		S	2547	2	___1	0.997707	UID2863	-0.806544	NaN	1.60876	1.19358
P70424	Erbb2	TGSTAHRRHRSSSARSGGGELTLGLEPSEEE	_S(ph)GGGELTLGLEPSEEEPPR_	NaN	0.908577	1.59916	0.526413	0.908577		S	1055	2	___1	0.999883	UID2865	NaN	0.465922	-0.811624	-0.285495
P70441	Slc9a3r1	QKESSREALVEPASESPRPALARSASSDTSE	_EALVEPASES(ph)PRPALAR_	-1.5985	1.38298	-3.31365	NaN	-1.5985		S	275	3	___1	0.995115	UID2866	-0.706771	0.708673	1.54042	#VALUE!
P70452	Stx4	KAIEPQKEEADENYNSVNTRMKKTQHGVLSQ	_AIEPQKEEADENYNS(ph)VNTR_	NaN	2.08343	2.91353	1.79629	2.08343		S	117	3	___1	0.948835	UID2867	NaN	1.06709	-1.44089	-0.855092
P70452	Stx4;Stx4a	_MRDRTHELRQGDNISDDEDEVRVALVVHSG	_QGDNIS(ph)DDEDEVR_	2.33134	1.09115	1.73587	1.22745	1.48166		S	15	2	___1	1	UID2868	0.966873	0.559345	-0.877075	-0.599943
P70460	Vasp	PGLAAAIAGAKLRKVSKQEEASGGPLAPKAE	_KVS(ph)KQEEASGGPLAPK_	-7.124	NaN	-7.77534	-1.98576	-7.124		S	235	2	___1	1	UID2869	-3.05998	NaN	3.67649	0.841329
P70671	Irf3	EFVTPGARDFVHLGASPDTNGKSSLPHSQEN	_DFVHLGAS(ph)PDTNGK_	-1.76601	-1.44871	-0.170222	-2.37978	-1.60736		S	123	2	___1	0.999985	UID2870	-0.778111	-0.740288	0.0354831	1.01806
P70671	Irf3	LGASPDTNGKSSLPHSQENLPKLFDGLILGP	_SSLPHS(ph)QENLPK_	0.138411	-0.817707	-0.388517	-0.808177	-0.598347		S	135	2	___1	1	UID2871	0.0329472	-0.417405	0.139993	0.31313
P70677	Casp3	____MENNKTSVDSKSINNFEVKTIHGSKSV	_S(ph)INNFEVK_	0.597247	0.18747	NaN	-0.696225	0.18747		S	12	2	___1	1	UID2872	0.228357	0.0969364	#VALUE!	0.262914
P70697	Urod	FRETRAAQDFFSTCRSPEACCELTLQPLRRF	_S(ph)PEACCELTLQPLR_	-2.13882	NaN	-2.19072	-0.548959	-2.13882		S	61	2	___1	1	UID2873	-0.936884	NaN	1.00281	0.196859
P80318	Cct3;Cct3;Cct3	RIVLLDSSLEYKKGESQTDIEITREEDFTRI	_KGES(ph)QTDIEITR_	0.826161	NaN	0.0150014	-0.350458	0.0150014		S	252	2	___1	0.999589	UID2875	0.325847	NaN	-0.0531943	0.107822
P81068	Irx1	SSPALPERDLVTRPDSPPQQLKSPFQPVRDN	_DLVTRPDS(ph)PPQQLK_	4.07221	3.04717	3.10888	4.93246	3.59055	Up	S	447	2	___1	0.999998	UID2878	1.70828	1.56023	-1.53441	-2.26181
P81068	Irx1	APRARVAPPASARDQSSPLSAAETLKSQDSP	_DQS(ph)SPLSAAETLK_	3.98526	2.54971	3.31992	3.95955	3.63973	Up	S	266	2	___1	0.945872	UID2879	1.67125	1.30568	-1.63545	-1.82541
P81068	Irx1	PRARVAPPASARDQSSPLSAAETLKSQDSPL	_DQSS(ph)PLSAAETLK_	4.01333	2.40113	3.67534	3.8765	3.77592	Up	S	267	2	___1	0.998109	UID2880	1.6832	1.22965	-1.80561	-1.78817
P81122	Irs2	VSPSFAHNSKRHNSASVENVSLRKSSEGSST	_HNSAS(ph)VENVSLR_	-1.0218	-1.81136	-2.02964	-0.979324	-1.41658		S	1165	2	___1	0.999989	UID2881	-0.461164	-0.925851	0.925696	0.389897
P81122	Irs2	GTAGGRPMSVAGSPLSPGPVRAPLSRSHTLS	_PMSVAGS(ph)PLS(ph)PGPVR_	NaN	-2.68703	-1.24741	-0.00991989	-1.24741		S	388	2	___1	1	UID2883	NaN	-1.37393	0.551196	-0.0449252
P81122	Irs2	DGAQDLDRGLRKRTYSLTTPARQRQVPQPSS	_TYS(ph)LTTPAR_	-2.61336	-2.04343	NaN	-4.19375	-2.61336	Down	S	573	2	___1	0.999022	UID2884	-1.13898	-1.0446	#VALUE!	1.83172
P81122	Irs2	QPIVAPPKPEGARVASPTSGLKRLSLMDQVS	_VAS(ph)PTSGLK_	-2.20675	-1.81007	-2.11673	-2.05519	-2.08596	Down	S	1089	2	___1	0.999451	UID2885	-0.965812	-0.925193	0.96739	0.872474
P83741-2	Wnk1	ATTTVPSSTSKDRPVSQPSLVGSKEEPPPSR	_DRPVS(ph)QPSLVGSK_	0.167752	0.558216	1.29897	1.0676	0.812908		S	165	2	___1	0.999944	UID2886	0.0454429	0.286645	-0.667905	-0.52824
P83741-2	Wnk1;Wnk1;Wnk1	LEAAFLSRGTEDGSGSPHSPPHLCSKSLPVQ	_GTEDGSGS(ph)PHS(ph)PPHLCSK_	-0.609893	-1.18103	1.18164	NaN	-0.609893		S	2273	3	___1	0.993299	UID2888	-0.285741	-0.603314	-0.611733	#VALUE!
P83741-2	Wnk1;Wnk1;Wnk1	AFLSRGTEDGSGSPHSPPHLCSKSLPVQNLS	_GTEDGSGSPHS(ph)PPHLCSK_	-0.80132	-1.49037	-0.862748	-1.22066	-1.0417		S	2276	3	___1	0.999868	UID2889	-0.367266	-0.761604	0.367036	0.498149
P83741-2	Wnk1	ASLQNFNISNLQKSISNPPGSNLRTT_____	_SIS(ph)NPPGSNLR_	1.63091	-0.327685	1.29916	0.895111	1.09714		S	2616	2	___1	0.996643	UID2890	0.668573	-0.166665	-0.667997	-0.450873
P83741-2	Wnk1;Wnk1	GKVPPAVIIPPAAPLSGRRRRPTKSKGSKSS	_VPPAVIIPPAAPLS(ph)GR_	-1.56823	1.45402	-0.81755	NaN	-0.81755		S	2365	2	___1	1	UID2891	-0.693878	0.745022	0.345396	#VALUE!
P84104	Srsf3	___________MHRDSCPLDCKVYVGNLGNN	_(ac)M(ox)HRDS(ph)CPLDCK_	-0.348708	-1.89823	-0.312077	-1.33453	-0.841619		S	5	3	___1	1	UID2892	-0.174507	-0.9703	0.103397	0.549226
P97310	Mcm2	TSSPGRSSRRADALTSSPGRDLPPFEDESEG	_RADALTS(ph)SPGR_	-0.921177	-1.05345	0.0818973	-1.74136	-0.987313		S	40	2	___1	0.930821	UID2893	-0.418311	-0.538032	-0.0852212	0.731705
P97310	Mcm2	SSPGRSSRRADALTSSPGRDLPPFEDESEGL	_RADALTSS(ph)PGR_	-0.711672	-0.559159	-0.939567	-1.54839	-0.825619		S	41	2	___1	0.998081	UID2894	-0.329087	-0.285108	0.403813	0.645148
P97310	Mcm2	____MAESSESLSASSPARQRRRISDPLTSS	_(ac)AESSESLSASS(ph)PAR_	-0.244837	-0.662943	-0.687413	-1.56725	-0.675178		S	12	2	___1	0.999985	UID2895	-0.130271	-0.338214	0.283092	0.65361
P97310	Mcm2	AGRGLGRMRRGLLYDSSEEDEERPARKRRHV	_GLLYDS(ph)S(ph)EEDEERPAR_	0.196841	-0.847346	-0.975342	NaN	-0.847346		S	139	2	___1	1	UID2896	0.0578315	-0.432571	0.42094	#VALUE!
P97310	Mcm2	ESLSASSPARQRRRISDPLTSSPGRSSRRAD	_RIS(ph)DPLTSS(ph)PGR_	-3.22053	-1.83843	-2.42846	-1.37386	-2.13345		S	21	2	___1	1	UID2898	-1.39756	-0.939704	1.11663	0.566864
P97310	Mcm2	SSPARQRRRISDPLTSSPGRSSRRADALTSS	_ISDPLTS(ph)S(ph)PGR_	NaN	-0.812065	-0.279645	-1.94947	-0.812065		S	26	2	___1	0.981254	UID2899	NaN	-0.414518	0.0878702	0.825053
P97310	Mcm2	SPARQRRRISDPLTSSPGRSSRRADALTSSP	_ISDPLTSS(ph)PGR_	0.0277552	-0.880532	-0.326348	-1.88733	-0.60344		S	27	2	___1	0.999853	UID2900	-0.014179	-0.449552	0.11023	0.797179
P97311	Mcm6	___MDLAAAAEPGAGSQHPEVRDEVAEKCQK	_(ac)M(ox)DLAAAAEPGAGS(ph)QHPEVR_	3.5067	0.346853	1.42255	-0.0535542	0.884702		S	13	3	___1	1	UID2903	1.46744	0.178492	-0.727069	-0.0253532
P97329	Kif20a	PYARILRSRHSPLLKSPFGKKY_________	_HSPLLKS(ph)PFGK_	1.81324	3.73217	1.02752	NaN	1.81324		S	881	3	___1	1	UID2905	0.746227	1.91073	-0.537948	#VALUE!
P97379-2	G3bp2	KPQVEEKHLEELEEKSATPPPAEPASLPQEP	_S(ph)ATPPPAEPASLPQEPPKPR_	-1.30045	-0.257301	-0.262585	0.1868	-0.259943		S	225	3	___1	0.857691	UID2908	-0.579836	-0.13065	0.0797024	-0.133163
P97434-5	Mprip;Mprip;Mprip;Mprip	DLRAEEQLPPLLSPPSPSTPHSRRSQVIEKF	_AEEQLPPLLSPPS(ph)PSTPHSR_	0.136755	0.147111	1.4245	-0.250421	0.141933		S	292	3	___1	0.988573	UID2910	0.032242	0.0762854	-0.728001	0.0629506
P97434-5	Mprip;Mprip	ASEAPTAPLSDACPLSPHRRAKSLDRRSTES	_DFASEAPTAPLSDACPLS(ph)PHR_	0.646907	0.549187	1.54621	0.131995	0.598047		S	364	3	___1	0.999999	UID2913	0.249506	0.282025	-0.786273	-0.108581
P97434-5	Mprip;Mprip;Mprip;Mprip	GPGMEDTALRMDIDRSPGLLGTPDLKTQNVH	_S(ph)PGLLGTPDLK_	0.947737	1.06308	1.29199	0.0507399	1.00541		S	622	2	___1	1	UID2914	0.377624	0.54498	-0.664563	-0.0721339
P97434-5	Mprip;Mprip;Mprip;Mprip;Mprip	KSPEGTTVSGYDIMKSKSNPDFLKKDRSCVT	_S(ph)KSNPDFLK_	1.34465	0.516066	1.36279	0.0602553	0.930358		S	995	2	___1	0.989167	UID2915	0.54666	0.265077	-0.698459	-0.076402
P97434-5	Mprip;Mprip;Mprip;Mprip;Mprip	PEGTTVSGYDIMKSKSNPDFLKKDRSCVTRQ	_SKS(ph)NPDFLKK_	1.28711	0.528473	1.5209	-0.054405	0.907791		S	997	3	___1	0.999566	UID2916	0.522156	0.271426	-0.774157	-0.0249716
P97434-5	Mprip;Mprip;Mprip	DRSCVTRQLRNIRSKSVIEQVSWDN______	_SKS(ph)VIEQVSWDN_	-0.0293062	0.725144	0.617465	-0.636706	0.294079		S	1020	2	___1	0.994542	UID2917	-0.0384804	0.372061	-0.341628	0.236217
P97452	Bop1	_____MAGACGKPHMSPASLPGKRRLEPDQE	_PHMS(ph)PASLPGK_	-0.417062	0.610429	-0.328023	0.78589	0.141203		S	11	3	___1	1	UID2918	-0.203618	0.313362	0.111031	-0.401883
P97452	Bop1	__MAGACGKPHMSPASLPGKRRLEPDQELQI	_(ac)AGACGKPHMSPAS(ph)LPGK_	4.72657	0.026919	-0.356625	NaN	0.026919		S	14	2	___1	0.996285	UID2919	1.98696	0.0147838	0.124725	#VALUE!
P97465	Dok1	SPHGVARLEFFDHKGSSSRGGRGGSRRLDCK	_LEFFDHKGS(ph)SSR_	1.14844	2.22796	1.24347	2.48846	1.73571		S	48	3	___1	0.994082	UID2920	0.463099	1.14104	-0.641334	-1.16556
P97792	Cxadr	QYNQVPSEDFERAPQSPTLAPAKVAAPNLSR	_APQS(ph)PTLAPAK_	-11.1489	-9.42062	-10.5165	-4.23067	-9.96856	Down	S	332	2	___1	0.998956	UID2923	-4.7741	-4.81946	4.98887	1.84828
P97801	Smn1;Smn1;Smn1	___________MAMGSGGAGSEQEDTVLFRR	_(ac)AMGS(ph)GGAGSEQEDTVLFR_	-0.110536	-1.25089	-0.223265	-2.17181	-0.737078		S	5	2	___1	0.986595	UID2924	-0.0730745	-0.639063	0.0608775	0.924784
P97801	Smn1;Smn1;Smn1	______MAMGSGGAGSEQEDTVLFRRGTGQS	_(ac)AM(ox)GSGGAGS(ph)EQEDTVLFR_	-0.140711	-1.04952	-0.522765	-1.57828	-0.786142		S	10	2	___1	1	UID2925	-0.0859254	-0.536022	0.204266	0.658554
P97825	Hn1	GGREDSESPGTQRSNSSEASSGDFLDLKGEG	_SNS(ph)SEASSGDFLDLK_	-0.236357	0.133977	-1.65406	1.76779	-0.05119		S	87	2	___1	0.951532	UID2927	-0.126659	0.0695647	0.745883	-0.842309
P97855	G3bp1	AALEEAAPDDVQKSTSPAPADVAPAQEDLRT	_STS(ph)PAPADVAPAQEDLR_	-1.19978	-0.374916	-0.457992	-1.19483	-0.826411		S	231	3	___1	0.961755	UID2928	-0.536964	-0.190833	0.173255	0.48656
P97868	Rbbp6	AVGAQPRPSANREDFSPERLLPLNIRNSPFT	_EDFS(ph)PER_	0.303832	-0.123684	-0.0961075	0.487448	0.103862		S	862	2	___1	1	UID2931	0.103397	-0.0622789	0	-0.268017
P97868	Rbbp6	GRPGWEHSNKLGYLVSPPQQIRRGERSCYRS	_LGYLVS(ph)PPQQIR_	0.628907	1.45183	0.0972811	0.763952	0.69643		S	517	2	___1	1	UID2932	0.24184	0.743903	-0.0925863	-0.392042
P97868	Rbbp6	SMKISKVEGTEIVKPSPKRKMEGDVEKLERT	_VEGTEIVKPS(ph)PK_	0.552714	-0.487921	0.0981488	-0.078044	0.0100524		S	1179	2	___1	1	UID2933	0.209391	-0.248656	-0.0930018	-0.0143684
P98083	Shc1;Shc1;Shc1;Shc1	VEGGQLGGEEWTRHGSFVNKPTRGWLHPNDK	_HGS(ph)FVNKPTR_	0.390378	-0.430853	0.459033	-1.12216	-0.0202375		S	139	3	___1	1	UID2934	0.140255	-0.219455	-0.265778	0.453965
Q00322	Cebpd	______MSAALFSLDSPVRGTPWPTEPAAFY	_(ac)SAALFSLDS(ph)PVR_	-1.20687	1.17708	-0.00450759	1.0631	0.529296		S	10	2	___1	1	UID2936	-0.539981	0.603312	-0.0438542	-0.526224
Q00560	Il6st	WPNVPDPSKSHIAQWSPHTPPRHNFNSKDQM	_SHIAQWS(ph)PHTPPR_	3.46491	3.96377	6.33331	4.6171	4.29043	Up	S	665	3	___1	0.999881	UID2937	1.44964	2.02924	-3.07814	-2.12036
Q00899	Yy1	VILVQTREEVVGGDDSDGLRAEDGFEDQILI	_EEVVGGDDS(ph)DGLR_	-0.0358882	-1.81688	0.148547	-0.944029	-0.489959		S	120	2	___1	1	UID2938	-0.0412835	-0.928677	-0.11713	0.374066
Q00PI9	Hnrnpul2	APGDKAVEEQGDDQDSEKSKPAGSDGERRGV	_AVEEQGDDQDS(ph)EK_	0.0698446	-0.695531	-0.146608	-0.467686	-0.307147		S	183	2	___1	1	UID2939	0.00374607	-0.354889	0.0241777	0.160404
Q00PI9	Hnrnpul2	EHDNGKGEEDGPEERSGDETPGSEAPGDKAV	_S(ph)GDETPGSEAPGDK_	-0.264768	-0.806396	-0.229614	-1.43068	-0.535582		S	159	2	___1	1	UID2940	-0.138759	-0.411618	0.0639171	0.592349
Q01147	Creb1;Creb1	LIEELKALKDLYCHKSD______________	_DLYCHKS(ph)D_	NaN	-1.12677	-1.62372	-1.78847	-1.62372		S	340	2	___1	1	UID2943	NaN	-0.575551	0.731357	0.752834
Q01320	Top2a	KAKGKKAQMCADVLPSPRGKRVIPQVTVEMK	_AQMCADVLPS(ph)PR_	0.854421	0.436834	1.10634	-1.19896	0.645628		S	1211	2	___1	1	UID2944	0.337882	0.224534	-0.57568	0.488412
Q01320	Top2a	SVVDLESDVKDSVPASPGVPAADFPAETEQS	_DSVPAS(ph)PGVPAADFPAETEQSK_	-0.0240569	-0.196656	0.759648	-1.74194	-0.110356		S	1388	2	___1	0.999934	UID2945	-0.0362448	-0.0996181	-0.4097	0.731965
Q02053	Uba1	SVDDSRLEELKATLPSPDKLPGFKMYPIDFE	_ATLPS(ph)PDKLPGFK_	-1.66134	-1.99299	-2.24998	-1.89251	-1.94275		S	835	2	___1	1	UID2947	-0.733531	-1.01879	1.03118	0.799502
Q02053	Uba1	AQAVNARSPPSVKQNSLDEDLIRKLAYVAAG	_QNS(ph)LDEDLIR_	-1.86385	-0.194874	-1.81398	-0.104121	-1.00443		S	377	2	___1	1	UID2948	-0.819776	-0.0987063	0.822445	-0.00267151
Q02248	Ctnnb1;Ctnnb1;Ctnnb1	HQLSKKEASRHAIMRSPQMVSAIVRTMQNTN	_S(ph)PQM(ox)VSAIVR_	0.303201	-0.445828	-0.542059	-1.56152	-0.493943		S	191	2	___1	1	UID2949	0.103128	-0.227118	0.213503	0.65104
Q02248	Ctnnb1;Ctnnb1	VQLLVRAHQDTQRRTSMGGTQQQFVEGVRME	_RTS(ph)M(ox)GGTQQQFVEGVR_	-1.27578	0.589706	-1.0854	-1.09859	-1.09199		S	552	2	___1	0.999828	UID2950	-0.569329	0.302758	0.473631	0.443394
Q02257	Jup	NQLSKKEASRRALMGSPQLVAAVVRTMQNTS	_ALM(ox)GS(ph)PQLVAAVVR_	-0.746362	0.787837	-2.13103	1.27563	0.0207375		S	182	2	___1	1	UID2951	-0.343861	0.40414	0.974236	-0.621555
Q02614	Sap30bp	PQELVASFSERVRNMSPDEIKIPPEPPGRCS	_NM(ox)S(ph)PDEIK_	-0.911594	-0.90435	-0.443258	-0.757557	-0.830954		S	113	2	___1	1	UID2952	-0.41423	-0.46174	0.166201	0.290424
Q02819	Nucb1;Nucb1	LAAREAELNARAQRLSQETEALGRSQDRLEA	_AQRLS(ph)QETEALGR_	0.862987	4.13312	1.23713	5.05701	2.68513		S	368	2	___1	0.999953	UID2954	0.34153	2.1159	-0.638299	-2.31768
Q03141	Mark3	KSSSSAVGGKGIAPASPMLGNAGNPNKADIP	_GIAPAS(ph)PM(ox)LGNAGNPNK_	3.09535	1.49328	4.01921	2.37888	2.73712	Up	S	469	2	___1	1	UID2957	1.29225	0.76511	-1.97024	-1.11641
Q03145	Epha2	KTLADFDPRVSIRLPSTSGSEGVPFRTVSEW	_LPS(ph)TSGSEGVPFR_	-4.6548	-3.20725	-4.70018	-2.89224	-3.93102	Down	S	898	2	___1	0.999987	UID2958	-2.00839	-1.64012	2.20423	1.24793
Q03145	Epha2	DFDPRVSIRLPSTSGSEGVPFRTVSEWLESI	_LPSTSGS(ph)EGVPFR_	-4.36512	NaN	-3.69416	-2.75105	-3.69416	Down	S	902	2	___1	0.995646	UID2960	-1.88502	NaN	1.7226	1.1846
Q03963	Eif2ak2	KYRQMHGVAITYKELSTSGPPHDRRFTFQVL	_ELS(ph)TSGPPHDR_	-4.41922	-5.00939	-4.90089	NaN	-4.90089	Down	S	30	2	___1	0.899263	UID2961	-1.90806	-2.56226	2.30033	#VALUE!
Q03963	Eif2ak2	RQMHGVAITYKELSTSGPPHDRRFTFQVLID	_ELSTS(ph)GPPHDR_	NaN	-6.51316	-4.60546	-6.08737	-6.08737	Down	S	32	2	___1	0.974642	UID2962	NaN	-3.33173	2.15889	2.68109
Q04690	Nf1;Nf1	QPSQANTKKLLGTRKSFDHLISDTKAPKRQE	_S(ph)FDHLISDTK_	-0.508116	1.46141	-1.20475	0.918939	0.205411		S	2545	2	___1	1	UID2964	-0.242396	0.748805	0.53077	-0.461561
Q04735	Cdk16	SPVRVRMRNHPPRKISTEDINKRLSLPADIR	_KIS(ph)TEDINK_	-2.53053	0.0610375	-4.09105	0.754722	-1.23475		S	110	2	___1	0.999455	UID2967	-1.1037	0.032242	1.91261	-0.387902
Q04735	Cdk16;Cdk17	HPPRKISTEDINKRLSLPADIRLPEGYLEKL;RIHRRISMEDLNKRLSLPADIRIPDGYLEKL	_RLS(ph)LPADIR_	0.785376	-1.58783	0.355162	-0.536307	-0.0905725		S	146	2	___1	1	UID2968	0.308477	-0.811472	-0.216049	0.191184
Q04735	Cdk16	DIRLPEGYLEKLTLNSPIFDKPLSRRLRRVS	_LTLNS(ph)PIFDKPLSR_	NaN	-0.15295	1.95234	0.208638	0.208638		S	138	2	___1	0.998618	UID2969	NaN	-0.0772541	-0.980711	-0.142959
Q04735	Cdk16	SPIFDKPLSRRLRRVSLSEIGFGKLETYIKL	_RVS(ph)LSEIGFGK_	-0.755014	-2.49005	-1.58499	-1.78598	-1.68548		S	153	2	___1	0.999983	UID2970	-0.347546	-1.27313	0.712816	0.751721
Q04735	Cdk16	IFDKPLSRRLRRVSLSEIGFGKLETYIKLDK	_VSLS(ph)EIGFGK_	NaN	-1.57721	-1.53849	-0.231584	-1.53849		S	155	2	___1	0.99936	UID2971	NaN	-0.806039	0.690551	0.0545012
Q04750	Top1	______MSGDHLHNDSQIEADFRLNDSHKHK	_(ac)SGDHLHNDS(ph)QIEADFR_	-0.431135	-0.380909	-0.174923	-0.550643	-0.406022		S	10	2	___1	1	UID2973	-0.209612	-0.193899	0.0377336	0.197614
Q04899	Cdk18	NPGLPKPLTRMSRRASLSDIGFGKLETYVKL	_RAS(ph)LSDIGFGK_	-4.37564	-3.46184	-4.29109	-3.12847	-3.87646	Down	S	109	2	___1	0.999997	UID2975	-1.8895	-1.77039	2.00838	1.35389
Q04899	Cdk18	GLPKPLTRMSRRASLSDIGFGKLETYVKLDK	_ASLS(ph)DIGFGK_	-0.161484	-0.878146	0.108193	-0.095797	-0.12864		S	111	2	___1	0.99995	UID2976	-0.0947723	-0.448331	-0.0978106	-0.00640536
Q04899	Cdk18	SPGMQYQQRQNQRRFSMEDLNKRLSLPMDIR	_RFS(ph)M(ox)EDLNK_	-4.9014	-2.9843	-5.26391	-3.44165	-4.17152	Down	S	66	2	___1	1	UID2977	-2.11341	-1.52604	2.47412	1.49436
Q04899	Cdk18	QNQRRFSMEDLNKRLSLPMDIRLPQEFLQKL	_RLS(ph)LPM(ox)DIR_	-5.94494	-3.77301	-5.27317	-3.99029	-4.63173	Down	S	75	2	___1	1	UID2978	-2.55784	-1.92961	2.47856	1.74045
Q05512-2	Mark2;Mark2;Mark2;Mark2;Mark2;Mark2;Mark2;Mark2;Mark2	EETGRKASSTAKVPASPLPGLDRKKTTPAPS	_VPAS(ph)PLPGLDR_	1.75909	0.508313	3.50835	2.13037	1.94473		S	451	2	___1	1	UID2979	0.723165	0.26111	-1.72566	-1.00494
Q05512-2	Mark2;Mark2;Mark2;Mark2;Mark2;Mark2;Mark2;Mark2;Mark2;Mark2;Mark2	PRPSTAPQRVPVASPSAHNISSSSGAPDRTN	_VPVASPS(ph)AHNISSSSGAPDR_	0.418844	NaN	-0.362424	-0.425391	-0.362424		S	566	3	___1	0.966369	UID2980	0.152378	NaN	0.127501	0.141433
Q05860-5	Fmn1;Fmn1	CEEMRDVCISTDDDCSPKAFRNVCIQTDRET	_DVCISTDDDCS(ph)PK_	-3.58492	-4.02449	-4.33503	-4.16726	-4.09587	Down	S	571	2	___1	0.999119	UID2982	-1.55275	-2.05829	2.02942	1.81983
Q05860-5	Fmn1;Fmn1	SQIVPKKLTISLTQLSPSKDSKDIHAPFQTR	_LTISLTQLS(ph)PSK_	-3.34006	-3.2816	-4.15465	-3.23381	-3.31083	Down	S	616	2	___1	0.999866	UID2983	-1.44847	-1.67816	1.94306	1.40114
Q05860-5		SKLELGGDGSHPAEHSPRQDQAAEEGSQIPP	_LELGGDGSHPAEHS(ph)PR_	-4.15776	-5.25528	-4.67859	-3.57153	-4.41817	Down	S	230	2	___1	0.999902	UID2985	-1.79671	-2.68808	2.1939	1.55262
Q05A36	Mex3c	MKTQRRGSQPSTPRLSPTFPESIEHPLARRV	_LS(ph)PTFPESIEHPLAR_	-2.33939	-0.892532	-2.62638	1.30836	-1.61596		S	538	3	___1	0.999808	UID2986	-1.0223	-0.455693	1.21139	-0.636235
Q05AH6		RAAEGLPQPQNPSSASPPGLRGTLDLQVIRV	_AAEGLPQPQNPSSAS(ph)PPGLR_	NaN	-1.79528	2.53559	1.68322	1.68322		S	313	2	___1	0.997506	UID2987	NaN	-0.917624	-1.25994	-0.804375
Q05AH6		IEQGNKKPRGQRWKESPENEPARKKRSRHMT	_WKES(ph)PENEPAR_	-1.52505	-0.848983	-0.881151	-0.609008	-0.865067		S	223	3	___1	1	UID2988	-0.675489	-0.433409	0.375846	0.223793
Q5XPI3-2	Rnf123;Rnf123	AIGGALPLPRPGWLSSPTLGRANRFLSTAAV	_PGWLSS(ph)PTLGR_	NaN	2.0262	5.3313	2.26112	2.26112	Up	S	681	2	___1	0.966888	UID2989	NaN	1.0378	-2.59841	-1.06359
Q05CL8	Larp7	SSSGVCKATKRPRTASEGSEAETPEAPKQPA	_T(ph)AS(ph)EGS(ph)EAETPEAPK_	-1.22291	NaN	-0.386602	0.397093	-0.386602		S	253	2	___1	0.999967	UID2990	-0.546814	NaN	0.139077	-0.227489
Q05D44	Eif5b	SKSKKTARPNSEAPLSGSEDADDSNKLSKKG	_PNSEAPLS(ph)GS(ph)EDADDSNK_	-0.411995	-0.530652	-0.449697	-0.267005	-0.430846		S	137	2	___1	1	UID2993	-0.20146	-0.270521	0.169284	0.0703892
Q05D44	Eif5b	GQKKNQKNKSVPTVDSGNEDDDSSFKIKTVA	_SVPTVDS(ph)GNEDDDSSFK_	-0.237651	-0.360728	-0.115332	-0.27282	-0.255236		S	215	2	___1	1	UID2995	-0.127211	-0.183572	0.0092038	0.0729976
Q08024	Cbfb	RSHREEMEARRQQDPSPGSNLGGGDDLKLR_	_QQDPS(ph)PGSNLGGGDDLK_	-0.433094	-1.12744	0.435863	-1.45173	-0.780267		S	173	2	___1	0.999996	UID3003	-0.210446	-0.575895	-0.254685	0.601792
Q08509	Eps8	RDSQRYKQLPVDRRKSQMEEVQDELFQRLTI	_RKS(ph)QMEEVQDELFQR_	-0.60218	-1.49277	NaN	-3.78787	-1.49277		S	684	3	___1	1	UID3004	-0.282456	-0.762828	#VALUE!	1.64966
Q08639	Tfdp1	IEANGELKVFIDQNLSPGKGVVSLVAVHPST	_VFIDQNLS(ph)PGK_	0.304463	0.868281	1.07724	-0.260566	0.586372		S	23	2	___1	1	UID3005	0.103665	0.445303	-0.56175	0.067501
Q09XV5	Chd8;Chd8	TLKLEDEVVARSRLTSQDYEVRVGSSDTAPL	_LTS(ph)QDYEVR_	-1.22772	0.785705	0.659571	2.84818	0.722638		S	2040	2	___1	0.999972	UID3007	-0.54886	0.403049	-0.361787	-1.32691
Q0KL02-4	Trio	STTFPSPFGKEAFPPSSPLQKGGSFWSSIPA	_EAFPPS(ph)SPLQK_	0.789204	1.48531	0.986892	NaN	0.986892		S	2480	2	___1	0.902568	UID3009	0.310107	0.76103	-0.518494	#VALUE!
Q0KL02-4	Trio	TTFPSPFGKEAFPPSSPLQKGGSFWSSIPAS	_EAFPPSS(ph)PLQK_	1.06006	2.1415	1.12142	NaN	1.12142		S	2481	2	___1	0.958686	UID3010	0.425459	1.0968	-0.582901	#VALUE!
Q0KL02-4	Trio	PASRPSSFTFPGDSDSLQRQTHRHAAPSKDT	_PSSFTFPGDSDS(ph)LQR_	2.13769	2.93084	2.40005	1.79478	2.26887	Up	S	2512	2	___1	0.997773	UID3013	0.884403	1.5007	-1.19505	-0.854414
Q0P5V9-2	Slc45a4;Slc45a4	RYRRANAVVLIKPSRSMSDLYDLQQRQRSRH	_S(ph)MSDLYDLQQR_	NaN	2.81605	0.833563	2.20567	2.20567		S	480	2	___1	0.918896	UID3014	NaN	1.44196	-0.445087	-1.03872
Q0PD20	Rab34;Rab34;Rab34;Rab34;Rab34	EKSGARHIADVVRINSDDKNLYLTASKKKAT	_INS(ph)DDKNLYLTASK_	NaN	-0.635984	-1.78229	0.0498269	-0.635984		S	241	2	___1	1	UID3015	NaN	-0.324419	0.807272	-0.0717244
Q0PHV7	Dact3	__________MIRAFSFPVSPERGRLRGWLE	_AFS(ph)FPVSPER_	3.74462	-0.12775	3.13227	0.631082	1.88168		S	6	2	___1	1	UID3016	1.56876	-0.0643592	-1.54561	-0.332444
Q0PHV7	Dact3	______MIRAFSFPVSPERGRLRGWLEGSLA	_AFSFPVS(ph)PER_	1.37075	1.1216	2.0284	1.93394	1.65234		S	10	2	___1	1	UID3017	0.557778	0.574925	-1.01712	-0.916834
Q0PHV7	Dact3	RRPRARVPAPRGPAPSPSAPPRRLLYGCAGS	_GPAPS(ph)PSAPPR_	4.41427	2.17062	6.89975	2.64965	3.53196	Up	S	481	2	___1	0.996429	UID3018	1.85396	1.1117	-3.34932	-1.23786
Q0PHV7	Dact3	SPSAPPRRLLYGCAGSDSECSAVGRPVPLGR	_LLYGCAGS(ph)DSECSAVGR_	1.15629	1.64208	3.19773	2.72991	2.186		S	496	2	___1	0.999924	UID3020	0.466444	0.841249	-1.57695	-1.27387
Q0PHV7	Dact3	GARRQNGARPRPPEASPPPGGARPAREPSTE	_PRPPEAS(ph)PPPGGAR_	1.72817	0.196156	2.47974	3.33388	2.10396		S	290	3	___1	1	UID3021	0.709996	0.101381	-1.23321	-1.54477
Q0PHV7	Dact3	GPSDPRGIYASERPKSLGDASPSAPESVGAR	_S(ph)LGDASPSAPESVGAR_	3.96296	2.03908	3.60413	2.04508	2.82461	Up	S	165	2	___1	1	UID3022	1.66175	1.04439	-1.77152	-0.966686
Q0PHV7	Dact3	GRRGSPRARKAARSQSETSLLGRAHAAPPPK	_SQS(ph)ETSLLGR_	2.09559	0.929322	2.80554	1.71449	1.90504		S	409	2	___1	0.999962	UID3023	0.866473	0.476537	-1.38919	-0.818401
Q0PHV7	Dact3	GPAPTPTVQACRRWRSTAEIDAPDGRRPRAR	_WRS(ph)TAEIDAPDGR_	5.42811	2.7448	5.09431	2.67524	3.91955	Up	S	456	2	___1	0.994809	UID3024	2.28573	1.4055	-2.48495	-1.24934
Q0VBL3	Rbm15	KRRLPEESGGRHLDRSPESERPRKQRHCTPS	_HLDRS(ph)PESERPR_	-0.912135	-0.139567	-0.147794	-0.260873	-0.204334		S	655	4	___1	0.998816	UID3025	-0.414461	-0.0704059	0.0247452	0.0676387
Q0VBL3	Rbm15	LPEESGGRHLDRSPESERPRKQRHCTPSPDR	_HLDRSPES(ph)ERPR_	0.153278	-0.700836	NaN	-0.0945043	-0.0945043		S	658	2	___1	0.997634	UID3026	0.0392789	-0.357603	#VALUE!	-0.00698516
Q0VBL3	Rbm15	KRFGDVSVKISHLSGSGSGDERVAFVNFRRP	_ISHLSGS(ph)GSGDER_	-0.079003	-0.618667	-0.443527	-1.39226	-0.531097		S	209	2	___1	0.998388	UID3028	-0.0596453	-0.315558	0.16633	0.575119
Q0VBL3	Rbm15	FGDVSVKISHLSGSGSGDERVAFVNFRRPED	_ISHLSGSGS(ph)GDER_	-0.111783	-1.19322	-0.359388	-1.3501	-0.776304		S	211	3	___1	0.999935	UID3029	-0.0736058	-0.609552	0.126048	0.556209
Q0VBL3	Rbm15	REYETGGGSSSSRLHSYSSPSTKNSSGGGES	_LHS(ph)YSSPSTK_	-0.253078	-1.36208	-0.0873257	-0.886688	-0.569883		S	124	2	___1	0.996869	UID3030	-0.13378	-0.695956	-0.00420435	0.348346
Q0VBL3	Rbm15	SHRHAPGGGGGQRSLSPGGAALGYRDYRLQQ	_SLS(ph)PGGAALGYR_	-0.353222	-0.955009	-0.327465	-0.568542	-0.460882		S	293	2	___1	1	UID3032	-0.17643	-0.487662	0.110764	0.205643
Q0VG34	4930480E11Rik	QLKTQAVKEPLNDPKSLPEIEGKNVCKPDVL	_S(ph)LPEIEGK_	-1.31283	0.194578	-1.08431	0.667862	-0.444866		S	310	2	___1	1	UID3033	-0.585107	0.100574	0.473112	-0.348941
Q0VGB7	Ppp4r2	SNSLNRMNGVMFPGNSPNYTDRSNINGPGTP	_MNGVM(ox)FPGNS(ph)PNYTDR_	-1.79976	0.995213	-0.804715	0.666183	-0.069266		S	159	2	___1	0.999793	UID3034	-0.792482	0.510253	0.339251	-0.348188
Q148V8	Fam83h	GQPESPRRPSLSRGDSTEAAAEERGSRVRLA	_GDS(ph)TEAAAEER_	-5.78178	NaN	-5.55282	-3.14479	-5.55282	Down	S	1041	2	___1	0.994776	UID3035	-2.48835	NaN	2.61245	1.36121
Q148V8	Fam83h	ERRGSPVPPVPERRGSLTFAGESSKTGPTEE	_RGS(ph)LTFAGESSK_	-4.58186	-4.34447	-2.21602	NaN	-4.34447	Down	S	970	2	___1	0.99876	UID3036	-1.97733	-2.22203	1.01493	#VALUE!
Q148V8	Fam83h	EPKGNPTPAYPERKGSPTPAYPERKGSPTPA	_KGS(ph)PTPAYPER_	-5.81771	-4.0855	-5.5574	-3.8359	-4.82145	Down	S	871	2	___1	1	UID3037	-2.50365	-2.08951	2.61464	1.6712
Q148V8	Fam83h	EQKGSPTSTYPDRRGSPVPPVPERRGSPVPP	_RGS(ph)PVPPVPER_	-5.69953	-4.29997	-5.83975	-3.8491	-4.99975	Down	S	948	2	___1	1	UID3038	-2.45332	-2.19926	2.74981	1.67712
Q148V8	Fam83h	LEYVPSSASREVRHGSDPAFGPSPRGLEPSG	_HGS(ph)DPAFGPSPR_	1.07315	1.4019	-4.22122	-4.358	-1.57403		S	522	2	___1	1	UID3039	0.431035	0.718351	1.97493	1.90539
Q148V8	Fam83h	ERKGSPTPAYPERKGSPTQAYPERKGSPTSG	_KGS(ph)PTQAYPER_	-5.26157	-4.23584	-6.32979	-3.5357	-4.7487	Down	S	904	2	___1	1	UID3040	-2.2668	-2.16644	2.98443	1.53655
Q148V8	Fam83h	ERKGSPTSGFPNRRGSPTTGLMEQKGSPTST	_RGS(ph)PTTGLMEQK_	-5.85344	-2.141	-5.56757	-4.2228	-4.89518	Down	S	926	2	___1	0.999992	UID3041	-2.51887	-1.09453	2.61951	1.84475
Q148V8	Fam83h	REEVVAPGGAGTERRSLESCLLDLRDSFAQQ	_S(ph)LESCLLDLR_	-3.7943	-3.31409	NaN	-2.64386	-3.31409	Down	S	778	2	___1	0.999858	UID3042	-1.64192	-1.69479	#VALUE!	1.13652
Q149C2	Traf3ip1	PGSARPAPPRVKRQESTETLVVDRSGSGKTV	_RQES(ph)TETLVVDR_	0.941734	0.311252	0.535387	0.513736	0.524561		S	409	2	___1	0.995179	UID3043	0.375067	0.160275	-0.302333	-0.279809
Q14AR7	1600027N09Rik	SRVTDKVLTANSNPSSPSAAKRRRT______	_VLTANSNPSS(ph)PSAAK_	0.128463	-0.267258	-0.452643	-1.11393	-0.359951		S	195	2	___1	0.977064	UID3045	0.0287106	-0.135745	0.170694	0.450274
[truncated: 2,836 more rows]
