# Supplementary material for: Phosphoproteomics reveals network rewiring to a pro-adhesion state in annexin-1-deficient mammary epithelial cells
Source: Breast Cancer Res. 2017 Dec 12;19:132. doi: 10.1186/s13058-017-0924-4 (PMC5727667; doi:10.1186/s13058-017-0924-4)
Supplement: Supplementary file 6 — List of all identified proteins in mammary epithelial cells from ANXA1-heterozygous and ANXA1-deficient mice. (XLSX 11902 kb) [file 13058_2017_924_MOESM6_ESM.xlsx]

## Sheet: proteinGroups
Table S3: List of all identified proteins in mammary epithelial cells from ANXA1-heterozygous and ANXA1-deficient mice
Protein IDs	Majority protein IDs	Peptide counts (all)	Peptide counts (razor+unique)	Peptide counts (unique)	Protein names	Gene names	Fasta headers	Proteins	Peptides	Razor + unique peptides	Unique peptides	Peptides Fwd1	Peptides Fwd2	Peptides Rev1	Peptides Rev2	Razor + unique peptides Fwd1	Razor + unique peptides Fwd2	Razor + unique peptides Rev1	Razor + unique peptides Rev2	Unique peptides Fwd1	Unique peptides Fwd2	Unique peptides Rev1	Unique peptides Rev2	Sequence coverage [%]	Unique + razor sequence coverage [%]	Unique sequence coverage [%]	Mol. weight [kDa]	Sequence length	Sequence lengths	Experiment Fwd1	Experiment Fwd2	Experiment Rev1	Experiment Rev2	Invert no	PEP	Ratio H/L	Ratio H/L normalized	Ratio H/L variability [%]	Ratio H/L count	Ratio H/L Fwd1	Ratio H/L normalized Fwd1	Ratio H/L variability [%] Fwd1	Ratio H/L count Fwd1	Ratio H/L Fwd2	Ratio H/L normalized Fwd2	Ratio H/L variability [%] Fwd2	Ratio H/L count Fwd2	Ratio H/L Rev1	Ratio H/L normalized Rev1
D3Z1J2;A0AUP1	D3Z1J2;A0AUP1	2;2	2;2	2;2	Coiled-coil domain-containing protein 112	Ccdc112	>tr|D3Z1J2|D3Z1J2_MOUSE Coiled-coil domain-containing protein 112 OS=Mus musculus GN=Ccdc112 PE=4 SV=2;>sp|A0AUP1|CC112_MOUSE Coiled-coil domain-containing protein 112 OS=Mus musculus GN=Ccdc112 PE=2 SV=2	2	2	2	2	1	1	0	0	1	1	0	0	1	1	0	0	4.2	4.2	4.2	60.993	525	525;442	1	2			3	7.151e-06	1.2557	1.4709	21.696	2	NaN	NaN	NaN	0	1.2557	1.4709	21.696	2	NaN	NaN
A0JNY3;Q8BUV3	A0JNY3;Q8BUV3	9;9	9;9	9;9	Gephyrin;Molybdopterin adenylyltransferase;Molybdopterin molybdenumtransferase	Gphn	>tr|A0JNY3|A0JNY3_MOUSE Gephyrin OS=Mus musculus GN=Gphn PE=2 SV=1;>sp|Q8BUV3|GEPH_MOUSE Gephyrin OS=Mus musculus GN=Gphn PE=1 SV=2	2	9	9	9	1	1	5	6	1	1	5	6	1	1	5	6	15.2	15.2	15.2	83.665	772	772;769	2	3	6	9	20	7.4087e-29	1.5308	1.5827	63.618	12	0.26497	0.36563	1.7712	2	NaN	NaN	NaN	0	1.5275	1.5986
A1A5B6;E9PWX7	A1A5B6;E9PWX7	1;1	1;1	1;1	TBC1 domain family member 25	Tbc1d25	>sp|A1A5B6|TBC25_MOUSE TBC1 domain family member 25 OS=Mus musculus GN=Tbc1d25 PE=1 SV=1;>tr|E9PWX7|E9PWX7_MOUSE TBC1 domain family member 25 OS=Mus musculus GN=Tbc1d25 PE=4 SV=1	2	1	1	1	1	1	1	1	1	1	1	1	1	1	1	1	1.5	1.5	1.5	82.574	742	742;723	11	6	10	6	33	1.3035e-15	NaN	NaN	NaN	0	NaN	NaN	NaN	0	NaN	NaN	NaN	0	NaN	NaN
A1BN54	A1BN54	70	2	2		Actn1	>tr|A1BN54|A1BN54_MOUSE Alpha actinin 1a OS=Mus musculus GN=Actn1 PE=2 SV=1	1	70	2	2	64	60	64	62	2	0	2	0	2	0	2	0	83.2	3	3	102.72	887	887	8		5		13	0	0.98311	1.3048	13.367	13	0.97095	1.3618	5.248	8	NaN	NaN	NaN	0	1.087	1.0655
Q61214;A1L341;Q9Z188-3;Q9Z188;Q9Z188-2	Q61214;A1L341	3;3;1;1;1	3;3;1;1;1	3;3;1;1;1	Dual specificity tyrosine-phosphorylation-regulated kinase 1A	Dyrk1a	>sp|Q61214|DYR1A_MOUSE Dual specificity tyrosine-phosphorylation-regulated kinase 1A OS=Mus musculus GN=Dyrk1a PE=1 SV=1;>tr|A1L341|A1L341_MOUSE Dual-specificity tyrosine-(Y)-phosphorylation regulated kinase 1a OS=Mus musculus GN=Dyrk1a PE=2 SV=1	5	3	3	3	1	2	1	3	1	2	1	3	1	2	1	3	5.4	5.4	5.4	85.493	763	763;754;689;629;589	14	20	8	21	63	5.8981e-61	NaN	NaN	NaN	0	NaN	NaN	NaN	0	NaN	NaN	NaN	0	NaN	NaN
A1L3P4;B0QZV3	A1L3P4;B0QZV3	1;1	1;1	1;1	Sodium/hydrogen exchanger	Slc9a6	>tr|A1L3P4|A1L3P4_MOUSE Sodium/hydrogen exchanger OS=Mus musculus GN=Slc9a6 PE=2 SV=1;>tr|B0QZV3|B0QZV3_MOUSE Sodium/hydrogen exchanger OS=Mus musculus GN=Slc9a6 PE=3 SV=1	2	1	1	1	0	0	0	1	0	0	0	1	0	0	0	1	1.7	1.7	1.7	77.952	702	702;670				1	1	0.00064032	NaN	NaN	NaN	0	NaN	NaN	NaN	0	NaN	NaN	NaN	0	NaN	NaN
Q05BA5;A2A468;O09000	Q05BA5;A2A468;O09000	4;4;4	4;4;4	4;4;4	Nuclear receptor coactivator 3	Ncoa3	>tr|Q05BA5|Q05BA5_MOUSE Nuclear receptor coactivator 3 OS=Mus musculus GN=Ncoa3 PE=2 SV=1;>tr|A2A468|A2A468_MOUSE Nuclear receptor coactivator 3 OS=Mus musculus GN=Ncoa3 PE=4 SV=1;>sp|O09000|NCOA3_MOUSE Nuclear receptor coactivator 3 OS=Mus musculus GN=Nco	3	4	4	4	3	3	4	4	3	3	4	4	3	3	4	4	4.5	4.5	4.5	151.95	1403	1403;1402;1398	12	21	14	20	67	7.0639e-72	NaN	NaN	NaN	0	NaN	NaN	NaN	0	NaN	NaN	NaN	0	NaN	NaN
A2A484;E9Q8D3;A2A482;E9Q8D1;A2A483;Q3U1M7;Q3UH28;A2A485;A2A480;A2A481;A2A486	A2A484;E9Q8D3;A2A482;E9Q8D1;A2A483;Q3U1M7;Q3UH28;A2A485;A2A480;A2A481	8;8;8;8;8;8;8;8;4;4;1	8;8;8;8;8;8;8;8;4;4;1	8;8;8;8;8;8;8;8;4;4;1		Zmynd8	>tr|A2A484|A2A484_MOUSE Protein Zmynd8 OS=Mus musculus GN=Zmynd8 PE=4 SV=1;>tr|E9Q8D3|E9Q8D3_MOUSE Protein Zmynd8 OS=Mus musculus GN=Zmynd8 PE=4 SV=2;>tr|A2A482|A2A482_MOUSE Protein Zmynd8 OS=Mus musculus GN=Zmynd8 PE=4 SV=1;>tr|E9Q8D1|E9Q8D1_MOUSE Protein	11	8	8	8	7	7	8	6	7	7	8	6	7	7	8	6	8.8	8.8	8.8	136.94	1235	1235;1223;1206;1199;1179;1174;1154;1094;492;472;192	54	53	52	61	220	2.8593e-203	NaN	NaN	NaN	0	NaN	NaN	NaN	0	NaN	NaN	NaN	0	NaN	NaN
Q91ZF0;A2A4A1;F7CGC9	Q91ZF0;A2A4A1;F7CGC9	6;6;4	6;6;4	6;6;4	DnaJ homolog subfamily C member 24	Dnajc24	>sp|Q91ZF0|DJC24_MOUSE DnaJ homolog subfamily C member 24 OS=Mus musculus GN=Dnajc24 PE=1 SV=3;>tr|A2A4A1|A2A4A1_MOUSE DnaJ (Hsp40) homolog, subfamily C, member 24 OS=Mus musculus GN=Dnajc24 PE=4 SV=1;>tr|F7CGC9|F7CGC9_MOUSE DnaJ homolog subfamily C member	3	6	6	6	1	2	4	4	1	2	4	4	1	2	4	4	37.2	37.2	37.2	22.08	196	196;148;116	2	3	8	5	18	9.6881e-48	1.6888	1.6262	48.891	18	0.34922	0.52213	9.7305	2	0.4973	0.67532	14.762	3	1.7545	1.6968
Q62077;A2A4A6;G3UXP4;F6SLL0	Q62077;A2A4A6	31;31;9;3	31;31;9;3	31;31;9;3	1-phosphatidylinositol 4,5-bisphosphate phosphodiesterase gamma-1	Plcg1	>sp|Q62077|PLCG1_MOUSE 1-phosphatidylinositol 4,5-bisphosphate phosphodiesterase gamma-1 OS=Mus musculus GN=Plcg1 PE=1 SV=2;>tr|A2A4A6|A2A4A6_MOUSE 1-phosphatidylinositol 4,5-bisphosphate phosphodiesterase gamma-1 OS=Mus musculus GN=Plcg1 PE=4 SV=1	4	31	31	31	15	18	22	8	15	18	22	8	15	18	22	8	36.9	36.9	36.9	149.67	1302	1302;1290;513;132	25	31	35	15	106	1.9269e-161	0.46048	0.64858	70.114	90	0.35004	0.50238	48.073	22	0.36383	0.47977	17.768	27	1.854	1.7747
A2A4B1;Q99PI4;A2A4B3	A2A4B1;Q99PI4;A2A4B3	3;3;3	3;3;3	3;3;3	Phosphatidate phosphatase LPIN3	Lpin3	>tr|A2A4B1|A2A4B1_MOUSE Lipin 3 OS=Mus musculus GN=Lpin3 PE=4 SV=1;>sp|Q99PI4|LPIN3_MOUSE Phosphatidate phosphatase LPIN3 OS=Mus musculus GN=Lpin3 PE=1 SV=1;>tr|A2A4B3|A2A4B3_MOUSE Lipin 3 OS=Mus musculus GN=Lpin3 PE=4 SV=1	3	3	3	3	1	2	2	1	1	2	2	1	1	2	2	1	3	3	3	95.458	858	858;848;817	4	5	3	4	16	8.7696e-28	1.0524	1.2391	29.165	2	NaN	NaN	NaN	0	0.69235	1.0082	NaN	1	1.5998	1.5229
K3W4P1;P97432;A2A4N7;A2A4N8;A2A4N5;Q05BC8;F6S397	K3W4P1;P97432;A2A4N7;A2A4N8;A2A4N5;Q05BC8;F6S397	2;2;2;2;2;2;1	2;2;2;2;2;2;1	2;2;2;2;2;2;1	Next to BRCA1 gene 1 protein	Nbr1	>tr|K3W4P1|K3W4P1_MOUSE Next to BRCA1 gene 1 protein OS=Mus musculus GN=Nbr1 PE=4 SV=1;>sp|P97432|NBR1_MOUSE Next to BRCA1 gene 1 protein OS=Mus musculus GN=Nbr1 PE=1 SV=1;>tr|A2A4N7|A2A4N7_MOUSE Neighbor of Brca1 gene 1 OS=Mus musculus GN=Nbr1 PE=4 SV=1;>	7	2	2	2	1	0	2	0	1	0	2	0	1	0	2	0	2.5	2.5	2.5	110.11	988	988;988;963;951;906;888;712	2		3		5	1.519e-05	1.1414	1.1307	NaN	1	NaN	NaN	NaN	0	NaN	NaN	NaN	0	1.1414	1.1307
A2A4P5;A2A4P2	A2A4P5;A2A4P2	2;2	1;1	1;1		Aarsd1	>tr|A2A4P5|A2A4P5_MOUSE Alanyl-tRNA synthetase domain containing 1 OS=Mus musculus GN=Aarsd1 PE=4 SV=1;>tr|A2A4P2|A2A4P2_MOUSE Alanyl-tRNA synthetase domain containing 1 (Fragment) OS=Mus musculus GN=Aarsd1 PE=4 SV=1	2	2	1	1	1	1	1	2	1	1	0	1	1	1	0	1	24.8	10.1	10.1	17.644	149	149;97	2	5		5	12	1.8418e-33	NaN	NaN	NaN	0	NaN	NaN	NaN	0	NaN	NaN	NaN	0	NaN	NaN
A2A4P4;A2A4P3;Q3THG9	A2A4P4;A2A4P3;Q3THG9	4;4;3	4;4;3	3;3;3	Alanyl-tRNA editing protein Aarsd1	Aarsd1	>tr|A2A4P4|A2A4P4_MOUSE Alanyl-tRNA synthetase domain containing 1 OS=Mus musculus GN=Aarsd1 PE=4 SV=1;>tr|A2A4P3|A2A4P3_MOUSE Alanyl-tRNA synthetase domain containing 1 OS=Mus musculus GN=Aarsd1 PE=4 SV=1;>sp|Q3THG9|AASD1_MOUSE Alanyl-tRNA editing protein	3	4	4	3	1	1	4	2	1	1	4	2	1	1	3	1	14	14	9.9	60.506	543	543;525;412	1	1	6	2	10	1.0477e-14	0.99286	0.94644	24.04	4	NaN	NaN	NaN	0	NaN	NaN	NaN	0	1.0224	1.0008
P84099;A2A547	P84099;A2A547	10;10	10;10	10;10	60S ribosomal protein L19;Ribosomal protein L19	Rpl19	>sp|P84099|RL19_MOUSE 60S ribosomal protein L19 OS=Mus musculus GN=Rpl19 PE=1 SV=1;>tr|A2A547|A2A547_MOUSE Ribosomal protein L19 OS=Mus musculus GN=Rpl19 PE=3 SV=1	2	10	10	10	8	10	8	9	8	10	8	9	8	10	8	9	32.1	32.1	32.1	23.466	196	196;194	60	49	43	56	208	0	0.75199	1.0166	50.62	208	0.60089	0.91157	53.411	60	0.57677	0.83955	55.123	49	1.1943	1.1121
A2A5K6	A2A5K6	1	1	1		Zfp335	>sp|A2A5K6|ZN335_MOUSE Zinc finger protein 335 OS=Mus musculus GN=Znf335 PE=2 SV=1	1	1	1	1	1	0	1	0	1	0	1	0	1	0	1	0	0.7	0.7	0.7	145.6	1337	1337	2		2		4	0.00093073	NaN	NaN	NaN	0	NaN	NaN	NaN	0	NaN	NaN	NaN	0	NaN	NaN
A2A5R2;F6YCJ0	A2A5R2	45;10	45;10	35;7		Arfgef2	>sp|A2A5R2|BIG2_MOUSE Brefeldin A-inhibited guanine nucleotide-exchange protein 2 OS=Mus musculus GN=Arfgef2 PE=1 SV=1	2	45	45	35	19	19	37	18	19	19	37	18	13	15	28	14	33.9	33.9	27	202.24	1792	1792;283	46	48	78	56	228	0	1.174	1.1407	85.54	138	0.56881	0.77862	91.464	33	0.6387	0.66477	41.456	21	1.3786	1.2947
A2A5S3;Q9DBE7;Q9Z108;A2A5R8;Q8CJ67;Q8CJ67-2;D3Z6D2;Q8CJ67-3;E2QRQ3	A2A5S3;Q9DBE7;Q9Z108;A2A5R8	4;4;4;4;1;1;1;1;1	4;4;4;4;1;1;1;1;1	4;4;4;4;1;1;1;1;1	Double-stranded RNA-binding protein Staufen homolog 1	Stau1	>tr|A2A5S3|A2A5S3_MOUSE Double-stranded RNA-binding protein Staufen homolog 1 OS=Mus musculus GN=Stau1 PE=4 SV=1;>tr|Q9DBE7|Q9DBE7_MOUSE Double-stranded RNA-binding protein Staufen homolog 1 OS=Mus musculus GN=Stau1 PE=2 SV=1;>sp|Q9Z108|STAU1_MOUSE Double-	9	4	4	4	2	0	4	2	2	0	4	2	2	0	4	2	8.3	8.3	8.3	54.855	495	495;489;487;485;570;538;511;479;473	4		6	3	13	5.4871e-10	1.2145	1.1574	45.138	13	1.259	1.7701	74.647	4	NaN	NaN	NaN	0	1.1683	1.0883
A2A5V4;P55194;A2A5V2;A2A5V3;A2A5V1	A2A5V4;P55194;A2A5V2;A2A5V3	21;20;17;17;1	21;20;17;17;1	21;20;17;17;1	SH3 domain-binding protein 1	Sh3bp1	>tr|A2A5V4|A2A5V4_MOUSE SH3 domain-binding protein 1 OS=Mus musculus GN=Sh3bp1 PE=4 SV=1;>sp|P55194|3BP1_MOUSE SH3 domain-binding protein 1 OS=Mus musculus GN=Sh3bp1 PE=1 SV=2;>tr|A2A5V2|A2A5V2_MOUSE SH3 domain-binding protein 1 OS=Mus musculus GN=Sh3bp1 P	5	21	21	21	10	10	10	12	10	10	10	12	10	10	10	12	39.7	39.7	39.7	74.172	680	680;601;584;582;55	23	28	26	32	109	2.2998e-112	0.79382	0.87394	41.56	36	0.62437	0.8406	52.731	9	0.76255	0.96302	34.349	7	0.80673	0.75967
A2A5Y4;Q80TG1;Q80TG1-5	A2A5Y4;Q80TG1;Q80TG1-5	2;2;2	2;2;2	2;2;2	KAT8 regulatory NSL complex subunit 1	1700081L11Rik;Kansl1	>tr|A2A5Y4|A2A5Y4_MOUSE KAT8 regulatory NSL complex subunit 1 OS=Mus musculus GN=Kansl1 PE=4 SV=1;>sp|Q80TG1|KANL1_MOUSE KAT8 regulatory NSL complex subunit 1 OS=Mus musculus GN=Kansl1 PE=1 SV=1;>sp|Q80TG1-5|KANL1_MOUSE Isoform 5 of KAT8 regulatory NSL com	3	2	2	2	1	1	2	2	1	1	2	2	1	1	2	2	2.9	2.9	2.9	120.4	1099	1099;1036;266	4	1	6	2	13	1.803e-06	NaN	NaN	NaN	0	NaN	NaN	NaN	0	NaN	NaN	NaN	0	NaN	NaN
A2A654;A2A655;E9Q6A7;A2A652	A2A654;A2A655;E9Q6A7	10;10;10;1	10;10;10;1	10;10;10;1		Bptf	>tr|A2A654|A2A654_MOUSE Bromodomain PHD finger transcription factor OS=Mus musculus GN=Bptf PE=4 SV=1;>tr|A2A655|A2A655_MOUSE Bromodomain PHD finger transcription factor OS=Mus musculus GN=Bptf PE=4 SV=1;>tr|E9Q6A7|E9Q6A7_MOUSE Protein Bptf OS=Mus musculus	4	10	10	10	5	8	4	9	5	8	4	9	5	8	4	9	5.2	5.2	5.2	333.22	3036	3036;2973;2921;158	22	25	22	48	117	1.1356e-203	0.62481	0.93115	NaN	1	NaN	NaN	NaN	0	0.62481	0.93115	NaN	1	NaN	NaN
A2A690-2;A2A690;F6VP19	A2A690-2;A2A690;F6VP19	5;5;3	5;5;3	5;5;3	Protein TANC2	Tanc2	>sp|A2A690-2|TANC2_MOUSE Isoform 2 of Protein TANC2 OS=Mus musculus GN=Tanc2;>sp|A2A690|TANC2_MOUSE Protein TANC2 OS=Mus musculus GN=Tanc2 PE=1 SV=1;>tr|F6VP19|F6VP19_MOUSE Protein TANC2 (Fragment) OS=Mus musculus GN=Tanc2 PE=4 SV=1	3	5	5	5	3	3	4	2	3	3	4	2	3	3	4	2	2.9	2.9	2.9	221.36	2004	2004;1994;1137	7	5	11	2	25	1.2077e-11	0.66911	1.0141	31.868	7	0.66911	1.0225	5.1302	3	0.79921	0.94629	NaN	1	0.5644	0.53633
A2A699;A2A699-2	A2A699;A2A699-2	1;1	1;1	1;1	Protein FAM171A2	Fam171a2	>sp|A2A699|F1712_MOUSE Protein FAM171A2 OS=Mus musculus GN=Fam171a2 PE=2 SV=1;>sp|A2A699-2|F1712_MOUSE Isoform 2 of Protein FAM171A2 OS=Mus musculus GN=Fam171a2	2	1	1	1	1	1	1	1	1	1	1	1	1	1	1	1	1.3	1.3	1.3	87.486	822	822;638	2	5	1	5	13	0.0012942	NaN	NaN	NaN	0	NaN	NaN	NaN	0	NaN	NaN	NaN	0	NaN	NaN
A2A6A1	A2A6A1	5	5	5	G patch domain-containing protein 8	Gpatch8	>sp|A2A6A1|GPTC8_MOUSE G patch domain-containing protein 8 OS=Mus musculus GN=Gpatch8 PE=2 SV=1	1	5	5	5	3	4	4	5	3	4	4	5	3	4	4	5	3.7	3.7	3.7	164.99	1505	1505	20	19	28	23	90	2.3146e-16	NaN	NaN	NaN	0	NaN	NaN	NaN	0	NaN	NaN	NaN	0	NaN	NaN
P19973-2;A2A6J4;P19973;A2A6J7	P19973-2;A2A6J4	3;3;1;1	3;3;1;1	3;3;1;1		Lsp1	>sp|P19973-2|LSP1_MOUSE Isoform 2 of Lymphocyte-specific protein 1 OS=Mus musculus GN=Lsp1;>tr|A2A6J4|A2A6J4_MOUSE Lymphocyte specific 1 OS=Mus musculus GN=Lsp1 PE=4 SV=1	4	3	3	3	1	1	1	3	1	1	1	3	1	1	1	3	9.1	9.1	9.1	36.548	328	328;322;330;324	4	8	4	8	24	1.4765e-06	1.2118	1.1988	48.864	2	NaN	NaN	NaN	0	NaN	NaN	NaN	0	NaN	NaN
Q9CZ28;A2A6M1	Q9CZ28;A2A6M1	3;3	3;3	3;3	Vacuolar-sorting protein SNF8	Snf8	>sp|Q9CZ28|SNF8_MOUSE Vacuolar-sorting protein SNF8 OS=Mus musculus GN=Snf8 PE=2 SV=1;>tr|A2A6M1|A2A6M1_MOUSE SNF8, ESCRT-II complex subunit, homolog (S. cerevisiae) OS=Mus musculus GN=Snf8 PE=4 SV=1	2	3	3	3	3	1	3	1	3	1	3	1	3	1	3	1	16.3	16.3	16.3	28.886	258	258;233	6	1	7	2	16	2.5243e-203	0.8808	1.1388	43.708	16	0.95454	1.5267	18.284	6	0.67175	1.0145	NaN	1	0.85487	0.74297
A2A6Q5-3;A2A6Q5-2;A2A6Q5;Q8R568	A2A6Q5-3;A2A6Q5-2;A2A6Q5;Q8R568	4;4;4;3	4;4;4;3	4;4;4;3	Cell division cycle protein 27 homolog	Cdc27	>sp|A2A6Q5-3|CDC27_MOUSE Isoform 3 of Cell division cycle protein 27 homolog OS=Mus musculus GN=Cdc27;>sp|A2A6Q5-2|CDC27_MOUSE Isoform 2 of Cell division cycle protein 27 homolog OS=Mus musculus GN=Cdc27;>sp|A2A6Q5|CDC27_MOUSE Cell division cycle protein 2	4	4	4	4	1	0	3	1	1	0	3	1	1	0	3	1	5.5	5.5	5.5	92.533	831	831;830;825;399	1		3	1	5	1.8196e-08	0.77427	0.76605	19.649	2	NaN	NaN	NaN	0	NaN	NaN	NaN	0	0.77427	0.76605
A2A6T1	A2A6T1	7	7	7	Cerebellar degeneration-related protein 2-like	Cdr2l	>sp|A2A6T1|CDR2L_MOUSE Cerebellar degeneration-related protein 2-like OS=Mus musculus GN=Cdr2l PE=2 SV=1	1	7	7	7	4	5	4	5	4	5	4	5	4	5	4	5	15.1	15.1	15.1	53.212	465	465	15	14	18	16	63	8.63e-39	0.82687	1.0636	NaN	1	NaN	NaN	NaN	0	0.82687	1.0636	NaN	1	NaN	NaN
Q8R035;A2A6T4;Q8R035-2;D6RHR8	Q8R035;A2A6T4;Q8R035-2;D6RHR8	4;4;2;2	4;4;2;2	4;4;2;2	Peptidyl-tRNA hydrolase ICT1, mitochondrial	Ict1	>sp|Q8R035|ICT1_MOUSE Peptidyl-tRNA hydrolase ICT1, mitochondrial OS=Mus musculus GN=Ict1 PE=1 SV=1;>tr|A2A6T4|A2A6T4_MOUSE Immature colon carcinoma transcript 1 OS=Mus musculus GN=Ict1 PE=4 SV=1;>sp|Q8R035-2|ICT1_MOUSE Isoform 2 of Peptidyl-tRNA hydrolase	4	4	4	4	3	3	2	4	3	3	2	4	3	3	2	4	22.8	22.8	22.8	23.477	206	206;186;177;64	7	5	5	8	25	1.1499e-20	0.91358	0.96433	40.891	22	1.1518	1.7308	10.244	6	1.1485	1.6342	17.536	4	0.75566	0.71433
A2A701	A2A701	8	1	1		Eif3m	>tr|A2A701|A2A701_MOUSE Eukaryotic translation initiation factor 3 subunit M (Fragment) OS=Mus musculus GN=Eif3m PE=4 SV=1	1	8	1	1	7	4	5	5	1	0	0	0	1	0	0	0	72.7	6.3	6.3	16.518	143	143	1				1	3.2434e-220	NaN	NaN	NaN	0	NaN	NaN	NaN	0	NaN	NaN	NaN	0	NaN	NaN
A2A791;A2A791-2;F6VYE2	A2A791;A2A791-2;F6VYE2	3;3;2	3;3;2	3;3;2	Zinc finger MYM-type protein 4	Zmym4	>sp|A2A791|ZMYM4_MOUSE Zinc finger MYM-type protein 4 OS=Mus musculus GN=Zmym4 PE=1 SV=1;>sp|A2A791-2|ZMYM4_MOUSE Isoform 2 of Zinc finger MYM-type protein 4 OS=Mus musculus GN=Zmym4;>tr|F6VYE2|F6VYE2_MOUSE Zinc finger MYM-type protein 4 (Fragment) OS=Mus	3	3	3	3	1	1	1	3	1	1	1	3	1	1	1	3	2.6	2.6	2.6	172.44	1549	1549;1460;1209	4	4	2	8	18	2.0281e-23	1.2233	1.1721	18.649	3	NaN	NaN	NaN	0	NaN	NaN	NaN	0	NaN	NaN
A2A7A7;Q8CFX1;A2A7A8	A2A7A7;Q8CFX1	25;25;3	25;25;3	25;25;3	GDH/6PGL endoplasmic bifunctional protein;Glucose 1-dehydrogenase;6-phosphogluconolactonase	H6pd	>tr|A2A7A7|A2A7A7_MOUSE GDH/6PGL endoplasmic bifunctional protein OS=Mus musculus GN=H6pd PE=4 SV=1;>sp|Q8CFX1|G6PE_MOUSE GDH/6PGL endoplasmic bifunctional protein OS=Mus musculus GN=H6pd PE=2 SV=2	3	25	25	25	17	7	17	12	17	7	17	12	17	7	17	12	39.8	39.8	39.8	89.909	797	797;789;172	28	9	34	24	95	5.4097e-135	0.88121	0.94826	24.548	92	0.94234	1.324	15.922	26	0.92165	1.2442	8.4362	8	0.87374	0.86369
Q9D5L7;A2A7B3;E9Q768;A2A7B2;A2A7B1;A2A7B0	Q9D5L7;A2A7B3;E9Q768;A2A7B2;A2A7B1;A2A7B0	1;1;1;1;1;1	1;1;1;1;1;1	1;1;1;1;1;1	SPRY domain-containing SOCS box protein 1	Spsb1	>sp|Q9D5L7|SPSB1_MOUSE SPRY domain-containing SOCS box protein 1 OS=Mus musculus GN=Spsb1 PE=1 SV=1;>tr|A2A7B3|A2A7B3_MOUSE SPRY domain-containing SOCS box protein 1 (Fragment) OS=Mus musculus GN=Spsb1 PE=4 SV=1;>tr|E9Q768|E9Q768_MOUSE SPRY domain-containi	6	1	1	1	0	1	0	0	0	1	0	0	0	1	0	0	4	4	4	30.785	273	273;201;40;38;37;20		1			1	0.0033445	NaN	NaN	NaN	0	NaN	NaN	NaN	0	NaN	NaN	NaN	0	NaN	NaN
A2A7B5	A2A7B5	4	4	4		Prdm2	>tr|A2A7B5|A2A7B5_MOUSE PR domain containing 2, with ZNF domain OS=Mus musculus GN=Prdm2 PE=4 SV=1	1	4	4	4	1	4	1	3	1	4	1	3	1	4	1	3	2.5	2.5	2.5	187.2	1709	1709	4	8	2	11	25	6.8877e-11	NaN	NaN	NaN	0	NaN	NaN	NaN	0	NaN	NaN	NaN	0	NaN	NaN
A2A7F4;E9Q532	A2A7F4;E9Q532	5;5	5;5	5;5		Rlf	>tr|A2A7F4|A2A7F4_MOUSE MCG122876 OS=Mus musculus GN=Rlf PE=4 SV=1;>tr|E9Q532|E9Q532_MOUSE Protein Rlf OS=Mus musculus GN=Rlf PE=4 SV=1	2	5	5	5	2	1	2	3	2	1	2	3	2	1	2	3	3.9	3.9	3.9	217.39	1918	1918;1808	5	4	6	7	22	9.0074e-106	0.97615	0.96195	15.134	6	0.47899	0.69504	NaN	1	NaN	NaN	NaN	0	0.97615	0.96195
A2A7S7;F6VXZ2	A2A7S7	47;4	1;0	1;0		Yars	>tr|A2A7S7|A2A7S7_MOUSE Tyrosine--tRNA ligase, cytoplasmic OS=Mus musculus GN=Yars PE=4 SV=1	2	47	1	1	38	30	45	40	0	0	1	0	0	0	1	0	77.3	2.3	2.3	63.001	564	564;129			2		2	0	NaN	NaN	NaN	0	NaN	NaN	NaN	0	NaN	NaN	NaN	0	NaN	NaN
A2A7S8-2;A2A7S8-4;A2A7S8	A2A7S8-2;A2A7S8-4;A2A7S8	4;3;3	4;3;3	1;0;0	Uncharacterized protein KIAA1522	Kiaa1522	>sp|A2A7S8-2|K1522_MOUSE Isoform 2 of Uncharacterized protein KIAA1522 OS=Mus musculus GN=Kiaa1522;>sp|A2A7S8-4|K1522_MOUSE Isoform 4 of Uncharacterized protein KIAA1522 OS=Mus musculus GN=Kiaa1522;>sp|A2A7S8|K1522_MOUSE Uncharacterized protein KIAA1522 OS	3	4	4	1	2	3	3	4	2	3	3	4	0	0	0	1	5.8	5.8	1.8	110.65	1070	1070;1025;1013	2	9	6	6	23	3.3199e-13	NaN	NaN	NaN	0	NaN	NaN	NaN	0	NaN	NaN	NaN	0	NaN	NaN
A2A7S8-3;D3Z0K5	A2A7S8-3	4;1	1;1	1;1			>sp|A2A7S8-3|K1522_MOUSE Isoform 3 of Uncharacterized protein KIAA1522 OS=Mus musculus GN=Kiaa1522	2	4	1	1	3	3	3	3	1	0	0	0	1	0	0	0	6.2	1.4	1.4	92.488	900	900;18	1				1	9.0849e-12	NaN	NaN	NaN	0	NaN	NaN	NaN	0	NaN	NaN	NaN	0	NaN	NaN
A2A837;Q542V3;Q8VE97	A2A837;Q542V3;Q8VE97	4;4;4	1;1;1	1;1;1	Serine/arginine-rich splicing factor 4	Srsf4	>tr|A2A837|A2A837_MOUSE Serine/arginine-rich-splicing factor 4 OS=Mus musculus GN=Srsf4 PE=4 SV=1;>tr|Q542V3|Q542V3_MOUSE Serine/arginine-rich-splicing factor 4 OS=Mus musculus GN=Srsf4 PE=2 SV=1;>sp|Q8VE97|SRSF4_MOUSE Serine/arginine-rich splicing factor	3	4	1	1	4	4	4	3	1	1	1	1	1	1	1	1	8.3	2.6	2.6	56.455	496	496;491;489	2	1	2	2	7	1.9675e-56	0.66263	0.63705	33.924	7	0.77044	1.1144	9.3732	2	0.69798	0.98392	NaN	1	0.61511	0.59146
A2A841;P48193;P48193-2;A2A842;A2AD32;A2A838;A2A839;F7BUB8;F6S4K9	A2A841;P48193;P48193-2;A2A842;A2AD32;A2A838;A2A839	7;7;6;6;6;6;6;3;2	3;3;3;3;3;2;2;1;1	3;3;3;3;3;2;2;1;1	Protein 4.1	Epb4.1;Epb41	>tr|A2A841|A2A841_MOUSE Erythrocyte protein band 4.1 OS=Mus musculus GN=Epb4.1 PE=4 SV=1;>sp|P48193|41_MOUSE Protein 4.1 OS=Mus musculus GN=Epb41 PE=1 SV=2;>sp|P48193-2|41_MOUSE Isoform 2 of Protein 4.1 OS=Mus musculus GN=Epb41;>tr|A2A842|A2A842_MOUSE Eryt	9	7	3	3	5	4	4	5	2	2	1	3	2	2	1	3	7.8	3.3	3.3	97.239	869	869;858;804;769;716;667;639;250;375	7	6	2	6	21	8.9664e-21	NaN	NaN	NaN	0	NaN	NaN	NaN	0	NaN	NaN	NaN	0	NaN	NaN
A2A870;A2A870-2	A2A870;A2A870-2	2;1	2;1	2;1	Fas-binding factor 1	Fbf1	>sp|A2A870|FBF1_MOUSE Fas-binding factor 1 OS=Mus musculus GN=Fbf1 PE=1 SV=1;>sp|A2A870-2|FBF1_MOUSE Isoform 2 of Fas-binding factor 1 OS=Mus musculus GN=Fbf1	2	2	2	2	1	1	2	1	1	1	2	1	1	1	2	1	2.5	2.5	2.5	130.14	1173	1173;389	1	2	11	2	16	2.4889e-14	0.92121	0.93064	29.982	2	NaN	NaN	NaN	0	NaN	NaN	NaN	0	0.92121	0.93064
Q8BHG2-3;Q8BHG2;A2A8E2;Q8BHG2-2;B7ZC71;B7ZC72;A2A8E4;D6REH4	Q8BHG2-3;Q8BHG2;A2A8E2;Q8BHG2-2;B7ZC71;B7ZC72	7;7;7;6;6;6;3;2	7;7;7;6;6;6;3;2	7;7;7;6;6;6;3;2	UPF0587 protein C1orf123 homolog	0610037L13Rik	>sp|Q8BHG2-3|CA123_MOUSE Isoform 3 of UPF0587 protein C1orf123 homolog OS=Mus musculus;>sp|Q8BHG2|CA123_MOUSE UPF0587 protein C1orf123 homolog OS=Mus musculus PE=2 SV=1;>tr|A2A8E2|A2A8E2_MOUSE Novel protein (0610037L13Rik) OS=Mus musculus GN=0610037L13Rik	8	7	7	7	3	2	6	2	3	2	6	2	3	2	6	2	41.8	41.8	41.8	22.048	196	196;160;138;168;155;153;66;110	5	4	11	3	23	1.3256e-17	0.95689	0.9876	14.59	23	0.77745	1.1865	9.97	5	0.88968	1.241	13.208	4	0.9961	0.95627
A2A8L5;F6S1X8;F6Y3V0	A2A8L5	7;3;2	7;3;2	7;3;2	Receptor-type tyrosine-protein phosphatase F	Ptprf	>sp|A2A8L5|PTPRF_MOUSE Receptor-type tyrosine-protein phosphatase F OS=Mus musculus GN=Ptprf PE=1 SV=1	3	7	7	7	1	5	2	0	1	5	2	0	1	5	2	0	3.8	3.8	3.8	211.49	1898	1898;1332;1291	1	5	2		8	3.331e-13	0.50277	0.62182	173	6	NaN	NaN	NaN	0	0.50277	0.72426	220.85	4	0.48982	0.50423
A2A8R0;A8Y5G5	A2A8R0;A8Y5G5	1;1	1;1	1;1		Zfyve9	>tr|A2A8R0|A2A8R0_MOUSE MCG17975 OS=Mus musculus GN=Zfyve9 PE=4 SV=1;>tr|A8Y5G5|A8Y5G5_MOUSE Protein Zfyve9 OS=Mus musculus GN=Zfyve9 PE=4 SV=1	2	1	1	1	1	1	1	1	1	1	1	1	1	1	1	1	1.1	1.1	1.1	152.42	1397	1397;1338	4	7	3	4	18	2.0129e-96	NaN	NaN	NaN	0	NaN	NaN	NaN	0	NaN	NaN	NaN	0	NaN	NaN
A2A8R7;B2RX14	A2A8R7;B2RX14	7;7	7;7	7;7	Terminal uridylyltransferase 4	Zcchc11	>tr|A2A8R7|A2A8R7_MOUSE Terminal uridylyltransferase 4 OS=Mus musculus GN=Zcchc11 PE=4 SV=1;>sp|B2RX14|TUT4_MOUSE Terminal uridylyltransferase 4 OS=Mus musculus GN=Zcchc11 PE=1 SV=2	2	7	7	7	4	5	4	4	4	5	4	4	4	5	4	4	4.4	4.4	4.4	185.12	1648	1648;1644	13	15	7	10	45	1.2585e-44	0.81443	0.9231	40.227	6	0.46263	0.59107	10.858	2	0.65758	0.80558	NaN	1	1.1653	1.1806
A2A8U2;A2A8U2-3	A2A8U2;A2A8U2-3	2;2	2;2	2;2	Transmembrane protein 201	Tmem201	>sp|A2A8U2|TM201_MOUSE Transmembrane protein 201 OS=Mus musculus GN=Tmem201 PE=2 SV=1;>sp|A2A8U2-3|TM201_MOUSE Isoform 3 of Transmembrane protein 201 OS=Mus musculus GN=Tmem201	2	2	2	2	1	1	2	1	1	1	2	1	1	1	2	1	4.5	4.5	4.5	72.499	664	664;634	4	4	4	6	18	5.2991e-06	1253.6	1253.5	18.054	2	NaN	NaN	NaN	0	NaN	NaN	NaN	0	1253.6	1253.5
E9PUK6;A2A8V9;Q52KI8;A2A8V8;E9QKA4;Q52KI8-2;F6UK16;F7BWM1;A2A983	E9PUK6;A2A8V9;Q52KI8;A2A8V8;E9QKA4;Q52KI8-2	44;44;43;43;43;41;19;6;2	44;44;43;43;43;41;19;6;2	42;42;41;41;41;39;19;6;0	Serine/arginine repetitive matrix protein 1	Srrm1	>tr|E9PUK6|E9PUK6_MOUSE Serine/arginine repetitive matrix protein 1 OS=Mus musculus GN=Srrm1 PE=4 SV=1;>tr|A2A8V9|A2A8V9_MOUSE Serine/arginine repetitive matrix 1 OS=Mus musculus GN=Srrm1 PE=4 SV=1;>sp|Q52KI8|SRRM1_MOUSE Serine/arginine repetitive matrix p	9	44	44	42	27	32	33	33	27	32	33	33	26	31	31	32	39.4	39.4	37.4	104.3	923	923;918;946;909;897;897;318;239;198	193	233	222	232	880	0	0.93889	1.0153	24.631	30	0.62421	0.90775	23.978	6	0.66694	0.85885	23.798	7	1.0955	1.0843
;1494250;1494251;1494252;1494253;1494254;1494255;1494256;1494257;1494258;1494259;1494260;1494261;1494262;1494263;1494264;1494265;1494266;1494267;1494268;1494269;1494270;1494271;1494272;1494273;1494274;1494275;1494276;1494277;1494278;1494279;1494280;1494281;1494282;1494283;1494284;1494285;1494286;1494287;1494288;1494289;1494290;1494291;1494292;1494293;1494294;1494295;1494296;1494297;1494298;149429…	23053;88971;120873;123194;164931;197279;308752;373561;405117;423447;645089;648565;769201;780408;781138;813597;828902;829055;1005621;1041064;1058137;1240535;1242857;1263203;1281322;1299638;1299691;1300962;1303721;1307727;1310216;1310266;1416763;1434854;1453526;1480677;1494346;1494420;1557486;1604617;1662478;1702436;1731782;1771135	44;45	76;77;78;79;80;81;82;83;84;85;86;87;88;89;90;91;92;93;94;95;96;97;98;99;100;101;102;103;104;105;106;107;108;6807;6808;6809;6810	230;471	220;260;387;389;391;400;401;404;448;450;461;463;469;572;574;616;624;626;633;635;655;657;713;714;756;758;770;772;774;787;791;793;795;796;799;890;892
A2A8Z1;E9PXZ2;F6UHR6;E9Q6C1	A2A8Z1;E9PXZ2;F6UHR6;E9Q6C1	6;6;6;6	6;6;6;6	1;1;1;1	Oxysterol-binding protein-related protein 9;Oxysterol-binding protein	Osbpl9	>sp|A2A8Z1|OSBL9_MOUSE Oxysterol-binding protein-related protein 9 OS=Mus musculus GN=Osbpl9 PE=1 SV=1;>tr|E9PXZ2|E9PXZ2_MOUSE Oxysterol-binding protein OS=Mus musculus GN=Osbpl9 PE=3 SV=2;>tr|F6UHR6|F6UHR6_MOUSE Oxysterol-binding protein OS=Mus musculus G	4	6	6	1	2	3	4	4	2	3	4	4	0	0	0	1	10.9	10.9	1.5	83.108	736	736;723;719;656	3	11	9	14	37	2.8764e-50	0.97302	0.97299	29.332	15	0.6336	0.85675	11.756	3	1.2409	1.568	25.53	3	0.97302	0.91293
A2A8Z1-2;Q5FWX7	A2A8Z1-2;Q5FWX7	6;6	1;1	1;1	Oxysterol-binding protein	Osbpl9	>sp|A2A8Z1-2|OSBL9_MOUSE Isoform 2 of Oxysterol-binding protein-related protein 9 OS=Mus musculus GN=Osbpl9;>tr|Q5FWX7|Q5FWX7_MOUSE Oxysterol-binding protein OS=Mus musculus GN=Osbpl9 PE=2 SV=1	2	6	1	1	2	3	5	3	0	0	1	0	0	0	1	0	14.6	3.8	3.8	71.527	639	639;626			1		1	3.4799e-49	0.68499	0.67262	NaN	1	NaN	NaN	NaN	0	NaN	NaN	NaN	0	0.68499	0.67262
Q9JKK0;A2A994;B0QZL9;Q7TNY3;Q9JHG6;Q9JHG6-2;Q9JHG6-3	Q9JKK0;A2A994;B0QZL9;Q7TNY3;Q9JHG6;Q9JHG6-2;Q9JHG6-3	2;2;2;1;1;1;1	2;2;2;1;1;1;1	2;2;2;1;1;1;1	Calcipressin-3;Calcipressin-1	Rcan3;Rcan1	>sp|Q9JKK0|RCAN3_MOUSE Calcipressin-3 OS=Mus musculus GN=Rcan3 PE=1 SV=1;>tr|A2A994|A2A994_MOUSE Calcipressin-3 (Fragment) OS=Mus musculus GN=Rcan3 PE=4 SV=1;>tr|B0QZL9|B0QZL9_MOUSE Calcipressin-3 (Fragment) OS=Mus musculus GN=Rcan3 PE=4 SV=1;>tr|Q7TNY3|Q7	7	2	2	2	2	1	1	1	2	1	1	1	2	1	1	1	10.9	10.9	10.9	27.153	239	239;159;137;251;198;198;118	2	5	3	5	15	1.3312e-22	NaN	NaN	NaN	0	NaN	NaN	NaN	0	NaN	NaN	NaN	0	NaN	NaN
A2A9B9;Q99J07;A8Y5H7	A2A9B9;Q99J07;A8Y5H7	4;4;4	4;4;4	4;4;4		Sec14l1	>tr|A2A9B9|A2A9B9_MOUSE Protein Sec14l1 OS=Mus musculus GN=Sec14l1 PE=4 SV=1;>tr|Q99J07|Q99J07_MOUSE Protein Sec14l1 OS=Mus musculus GN=Sec14l1 PE=2 SV=1;>tr|A8Y5H7|A8Y5H7_MOUSE Protein Sec14l1 OS=Mus musculus GN=Sec14l1 PE=4 SV=1	3	4	4	4	0	1	3	3	0	1	3	3	0	1	3	3	7.4	7.4	7.4	81.807	719	719;716;715		2	4	4	10	2.7525e-27	1.5163	1.5011	49.079	9	NaN	NaN	NaN	0	0.40661	0.51058	0.44733	2	1.5474	1.5205
A2A9C3;A2A9C3-2	A2A9C3;A2A9C3-2	7;7	7;7	7;7	Protein SZT2	Szt2	>sp|A2A9C3|SZT2_MOUSE Protein SZT2 OS=Mus musculus GN=Szt2 PE=1 SV=1;>sp|A2A9C3-2|SZT2_MOUSE Isoform 2 of Protein SZT2 OS=Mus musculus GN=Szt2	2	7	7	7	4	2	3	3	4	2	3	3	4	2	3	3	2.9	2.9	2.9	377.62	3431	3431;3430	18	4	8	6	36	5.6501e-46	0.57125	0.76526	156.32	5	0.30114	0.46037	218.07	3	0.57125	0.76526	NaN	1	NaN	NaN
Q8BMK0;A2A9K3;Q8C1L6	Q8BMK0;A2A9K3;Q8C1L6	2;2;1	2;2;1	2;2;1	Centrosomal protein of 85 kDa	Cep85;Ccdc21	>sp|Q8BMK0|CEP85_MOUSE Centrosomal protein of 85 kDa OS=Mus musculus GN=Cep85 PE=2 SV=2;>tr|A2A9K3|A2A9K3_MOUSE Coiled-coil domain containing 21 OS=Mus musculus GN=Ccdc21 PE=4 SV=1;>tr|Q8C1L6|Q8C1L6_MOUSE Protein Ccdc21 OS=Mus musculus GN=Ccdc21 PE=2 SV=1	3	2	2	2	2	1	2	2	2	1	2	2	2	1	2	2	3.3	3.3	3.3	85.339	761	761;759;77	4	3	4	4	15	1.1011e-45	NaN	NaN	NaN	0	NaN	NaN	NaN	0	NaN	NaN	NaN	0	NaN	NaN
Q8R1A4;A2A9M5;Q8R1A4-2;E9PX48;A2A9M4;A2AW79;F6ZJ55	Q8R1A4;A2A9M5;Q8R1A4-2;E9PX48	73;73;73;72;22;8;7	73;73;73;72;22;8;7	69;69;69;68;19;8;7	Dedicator of cytokinesis protein 7	Dock7	>sp|Q8R1A4|DOCK7_MOUSE Dedicator of cytokinesis protein 7 OS=Mus musculus GN=Dock7 PE=1 SV=3;>tr|A2A9M5|A2A9M5_MOUSE Dedicator of cytokinesis 7 OS=Mus musculus GN=Dock7 PE=4 SV=1;>sp|Q8R1A4-2|DOCK7_MOUSE Isoform 2 of Dedicator of cytokinesis protein 7 OS=M	7	73	73	69	50	37	43	39	50	37	43	39	48	36	41	37	43.5	43.5	41.5	241.44	2130	2130;2128;2128;2098;727;241;255	176	149	151	172	648	0	0.79969	0.89634	28.142	207	0.7562	0.88242	27.772	59	0.82212	0.92562	37.279	39	0.82749	0.81809
P58058;A2A9P0;A2A9N9	P58058;A2A9P0;A2A9N9	2;2;1	2;2;1	2;2;1	NAD kinase	Nadk	>sp|P58058|NADK_MOUSE NAD kinase OS=Mus musculus GN=Nadk PE=1 SV=2;>tr|A2A9P0|A2A9P0_MOUSE NAD kinase (Fragment) OS=Mus musculus GN=Nadk PE=4 SV=1;>tr|A2A9N9|A2A9N9_MOUSE NAD kinase (Fragment) OS=Mus musculus GN=Nadk PE=4 SV=1	3	2	2	2	2	1	2	1	2	1	2	1	2	1	2	1	5.9	5.9	5.9	48.597	439	439;85;70	14	4	8	6	32	4.163e-15	NaN	NaN	NaN	0	NaN	NaN	NaN	0	NaN	NaN	NaN	0	NaN	NaN
P24788;A2A9P6;P24788-2;Q64434	P24788;A2A9P6;P24788-2	12;12;8;1	12;12;8;1	12;12;8;1	Cyclin-dependent kinase 11B	Cdk11b	>sp|P24788|CD11B_MOUSE Cyclin-dependent kinase 11B OS=Mus musculus GN=Cdk11b PE=1 SV=2;>tr|A2A9P6|A2A9P6_MOUSE Cell division cycle 2-like 1 OS=Mus musculus GN=Cdk11b PE=4 SV=1;>sp|P24788-2|CD11B_MOUSE Isoform 2 of Cyclin-dependent kinase 11B OS=Mus musculu	4	12	12	12	4	7	5	8	4	7	5	8	4	7	5	8	15.9	15.9	15.9	91.512	784	784;750;439;451	15	20	12	25	72	6.2028e-53	1.0366	1.053	14.028	7	0.70707	0.96149	NaN	1	0.77483	0.99158	NaN	1	1.3181	1.2354
Q8R516;Q8R516-2;A2A9P8;Q8R516-3	Q8R516;Q8R516-2;A2A9P8;Q8R516-3	1;1;1;1	1;1;1;1	1;1;1;1	E3 ubiquitin-protein ligase MIB2	Mib2	>sp|Q8R516|MIB2_MOUSE E3 ubiquitin-protein ligase MIB2 OS=Mus musculus GN=Mib2 PE=1 SV=2;>sp|Q8R516-2|MIB2_MOUSE Isoform 2 of E3 ubiquitin-protein ligase MIB2 OS=Mus musculus GN=Mib2;>tr|A2A9P8|A2A9P8_MOUSE E3 ubiquitin-protein ligase MIB2 (Fragment) OS=Mu	4	1	1	1	1	1	1	1	1	1	1	1	1	1	1	1	1.1	1.1	1.1	105.96	973	973;921;375;294	4	3	4	4	15	1.1822e-07	NaN	NaN	NaN	0	NaN	NaN	NaN	0	NaN	NaN	NaN	0	NaN	NaN
A2A9Q2;Q8BHG1;A6PWC3;Q3V3G9	A2A9Q2;Q8BHG1;A6PWC3	48;48;44;19	48;48;44;19	48;48;44;19	Nardilysin	Nrd1	>tr|A2A9Q2|A2A9Q2_MOUSE Nardilysin OS=Mus musculus GN=Nrd1 PE=3 SV=1;>sp|Q8BHG1|NRDC_MOUSE Nardilysin OS=Mus musculus GN=Nrd1 PE=1 SV=1;>tr|A6PWC3|A6PWC3_MOUSE Nardilysin OS=Mus musculus GN=Nrd1 PE=3 SV=1	4	48	48	48	30	30	41	35	30	30	41	35	30	30	41	35	48	48	48	140.62	1229	1229;1161;1117;395	73	87	83	73	316	0	0.96974	1.0745	22.936	287	0.6297	0.90533	16.416	64	0.67916	0.89658	18.156	79	1.2561	1.2781
Q3U2P1;A2AA71;Q3U2P1-2;A2AA72	Q3U2P1;A2AA71	20;20;7;7	19;19;7;7	19;19;7;7	Protein transport protein Sec24A	Sec24a	>sp|Q3U2P1|SC24A_MOUSE Protein transport protein Sec24A OS=Mus musculus GN=Sec24a PE=1 SV=1;>tr|A2AA71|A2AA71_MOUSE Protein transport protein Sec24A OS=Mus musculus GN=Sec24a PE=4 SV=1	4	20	19	19	11	12	13	9	11	12	12	9	11	12	12	9	22.2	21.5	21.5	118.78	1090	1090;1089;592;591	30	25	34	21	110	1.3735e-75	1.0481	1.0332	59.521	76	0.39638	0.56312	38.738	18	0.47422	0.62886	24.5	17	1.3969	1.39
Q6NXN1;A2AA85;Q6NXN1-2;A2AA86	Q6NXN1;A2AA85;Q6NXN1-2;A2AA86	9;9;9;9	9;9;9;9	9;9;9;9	UPF0485 protein C1orf144 homolog	D4Ertd22e	>sp|Q6NXN1|SZRD1_MOUSE SUZ domain-containing protein 1 OS=Mus musculus GN=Szrd1 PE=1 SV=1;>tr|A2AA85|A2AA85_MOUSE Novel protein (D4Ertd22e) (Fragment) OS=Mus musculus GN=Szrd1 PE=4 SV=1;>sp|Q6NXN1-2|SZRD1_MOUSE Isoform 2 of SUZ domain-containing protein 1	4	9	9	9	4	5	4	5	4	5	4	5	4	5	4	5	58.6	58.6	58.6	16.998	152	152;146;133;132	10	14	8	12	44	6.5646e-83	1.2075	1.1646	38.3	12	0.44954	0.66321	3.3732	3	0.44653	0.61122	21.646	2	1.4852	1.3985
A2AAE1-3;A2AAE1-2;A2AAE1;A2AAE1-6;A2AAE1-4;F6RPM4;F6YAT5;A2AB97;A2AAE1-5;F6YB09	A2AAE1-3;A2AAE1-2;A2AAE1;A2AAE1-6;A2AAE1-4	7;7;7;7;7;1;1;1;1;1	7;7;7;7;7;1;1;1;1;1	7;7;7;7;7;1;1;1;1;1	Uncharacterized protein KIAA1109	Kiaa1109	>sp|A2AAE1-3|K1109_MOUSE Isoform 3 of Uncharacterized protein KIAA1109 OS=Mus musculus GN=Kiaa1109;>sp|A2AAE1-2|K1109_MOUSE Isoform 2 of Uncharacterized protein KIAA1109 OS=Mus musculus GN=Kiaa1109;>sp|A2AAE1|K1109_MOUSE Uncharacterized protein KIAA1109 OS	10	7	7	7	3	4	2	4	3	4	2	4	3	4	2	4	1.5	1.5	1.5	561.33	5058	5058;5026;5005;4970;4618;1711;1586;1507;877;228	6	11	5	11	33	3.4925e-101	0.66103	1.0081	15.335	5	0.57357	0.89936	16.135	2	0.60453	0.84392	NaN	1	NaN	NaN
O35250;A2AAN0;O35250-2;A2AAN3;A2AAN4	O35250;A2AAN0;O35250-2	6;6;6;1;1	6;6;6;1;1	6;6;6;1;1	Exocyst complex component 7	Exoc7	>sp|O35250|EXOC7_MOUSE Exocyst complex component 7 OS=Mus musculus GN=Exoc7 PE=1 SV=2;>tr|A2AAN0|A2AAN0_MOUSE Exocyst complex component 7 OS=Mus musculus GN=Exoc7 PE=4 SV=1;>sp|O35250-2|EXOC7_MOUSE Isoform 2 of Exocyst complex component 7 OS=Mus musculus G	5	6	6	6	2	2	4	1	2	2	4	1	2	2	4	1	13.8	13.8	13.8	79.959	697	697;684;653;288;105	3	3	4	1	11	3.7648e-15	1.0958	1.37	39.409	11	1.1295	1.6333	10.049	3	1.0958	1.37	15.932	3	0.7525	0.72185
A2AAY5	A2AAY5	9	8	8	SH3 and PX domain-containing protein 2B	Sh3pxd2b	>sp|A2AAY5|SPD2B_MOUSE SH3 and PX domain-containing protein 2B OS=Mus musculus GN=Sh3pxd2b PE=1 SV=1	1	9	8	8	5	5	3	4	5	4	3	4	5	4	3	4	15	13.9	13.9	101.52	908	908	26	59	23	50	158	1.6218e-47	0.91182	1.0469	140.8	10	0.1801	0.25876	39.263	3	0.15189	0.1873	43.392	2	3.348	3.0287
Q99PQ2-2;Q99PQ2;A2AB83	Q99PQ2-2;Q99PQ2;A2AB83	1;1;1	1;1;1	1;1;1	E3 ubiquitin-protein ligase TRIM11	Trim11	>sp|Q99PQ2-2|TRI11_MOUSE Isoform 2 of E3 ubiquitin-protein ligase TRIM11 OS=Mus musculus GN=Trim11;>sp|Q99PQ2|TRI11_MOUSE E3 ubiquitin-protein ligase TRIM11 OS=Mus musculus GN=Trim11 PE=1 SV=1;>tr|A2AB83|A2AB83_MOUSE E3 ubiquitin-protein ligase TRIM11 OS=M	3	1	1	1	1	1	1	1	1	1	1	1	1	1	1	1	3.3	3.3	3.3	54.313	483	483;467;253	5	7	4	4	20	0.00017153	NaN	NaN	NaN	0	NaN	NaN	NaN	0	NaN	NaN	NaN	0	NaN	NaN
A2ABV5;A2ABV5-2;A2BDN7;A2BDP0;A2ABV5-3;A2ABV5-4	A2ABV5;A2ABV5-2;A2BDN7;A2BDP0	12;7;7;6;5;4	12;7;7;6;5;4	12;7;7;6;5;4	Mediator of RNA polymerase II transcription subunit 14	Med14	>sp|A2ABV5|MED14_MOUSE Mediator of RNA polymerase II transcription subunit 14 OS=Mus musculus GN=Med14 PE=1 SV=1;>sp|A2ABV5-2|MED14_MOUSE Isoform 2 of Mediator of RNA polymerase II transcription subunit 14 OS=Mus musculus GN=Med14;>tr|A2BDN7|A2BDN7_MOUSE M	6	12	12	12	2	8	7	3	2	8	7	3	2	8	7	3	14	14	14	160.96	1459	1459;770;700;798;471;362	2	12	13	7	34	2.4652e-54	1.2573	1.2375	34.256	22	0.58489	0.77887	NaN	1	0.54512	0.7077	19.443	8	1.4213	1.3861
Q922E4;A2ABY3	Q922E4;A2ABY3	5;5	5;5	5;5	Ethanolamine-phosphate cytidylyltransferase	Pcyt2	>sp|Q922E4|PCY2_MOUSE Ethanolamine-phosphate cytidylyltransferase OS=Mus musculus GN=Pcyt2 PE=1 SV=1;>tr|A2ABY3|A2ABY3_MOUSE Ethanolamine-phosphate cytidylyltransferase OS=Mus musculus GN=Pcyt2 PE=4 SV=1	2	5	5	5	3	1	3	1	3	1	3	1	3	1	3	1	18.8	18.8	18.8	45.234	404	404;386	4	2	4	2	12	2.3884e-17	0.84313	0.98694	39.162	12	0.53779	0.82735	9.7387	4	0.50705	0.67415	13.012	2	1.7777	1.7101
A2ABZ0	A2ABZ0	7	1	1		Pycr1	>tr|A2ABZ0|A2ABZ0_MOUSE Pyrroline-5-carboxylate reductase 1 (Fragment) OS=Mus musculus GN=Pycr1 PE=4 SV=1	1	7	1	1	4	5	5	5	0	0	0	1	0	0	0	1	39.6	9.8	9.8	17.37	164	164				1	1	1.1384e-28	NaN	NaN	NaN	0	NaN	NaN	NaN	0	NaN	NaN	NaN	0	NaN	NaN
O54864-2;A2AC19;O54864	O54864-2;A2AC19;O54864	1;1;1	1;1;1	1;1;1	Histone-lysine N-methyltransferase SUV39H1	Suv39h1	>sp|O54864-2|SUV91_MOUSE Isoform 2 of Histone-lysine N-methyltransferase SUV39H1 OS=Mus musculus GN=Suv39h1;>tr|A2AC19|A2AC19_MOUSE Histone-lysine N-methyltransferase SUV39H1 OS=Mus musculus GN=Suv39h1 PE=3 SV=1;>sp|O54864|SUV91_MOUSE Histone-lysine N-meth	3	1	1	1	1	1	1	1	1	1	1	1	1	1	1	1	3.3	3.3	3.3	51.889	453	453;413;412	16	14	14	13	57	3.2856e-21	NaN	NaN	NaN	0	NaN	NaN	NaN	0	NaN	NaN	NaN	0	NaN	NaN
A2ACM0;Q8K4Q0;Q8K4Q0-2;Q8K4Q0-3;E9PXZ5;F7CN67;Q8K4Q0-4;F7BQS0;F6U5L3	A2ACM0;Q8K4Q0;Q8K4Q0-2	6;6;4;2;1;1;1;1;1	6;6;4;2;1;1;1;1;1	6;6;4;2;1;1;1;1;1	Regulatory-associated protein of mTOR	Rptor	>tr|A2ACM0|A2ACM0_MOUSE Novel protein containing six WD40 domains at C-terminus OS=Mus musculus GN=Rptor PE=4 SV=1;>sp|Q8K4Q0|RPTOR_MOUSE Regulatory-associated protein of mTOR OS=Mus musculus GN=Rptor PE=1 SV=1;>sp|Q8K4Q0-2|RPTOR_MOUSE Isoform 2 of Regulat	9	6	6	6	4	1	2	5	4	1	2	5	4	1	2	5	5.8	5.8	5.8	149.5	1335	1335;1335;658;307;387;264;248;172;89	27	21	23	33	104	0	0.99098	0.97918	32.671	12	0.57825	0.85258	47.02	6	NaN	NaN	NaN	0	0.98056	0.93716
A2ACV6;E1U8D0	A2ACV6;E1U8D0	10;8	10;8	10;8		9830001H06Rik;Soga	>tr|A2ACV6|A2ACV6_MOUSE Novel protein OS=Mus musculus GN=9830001H06Rik PE=4 SV=1;>sp|E1U8D0|SOGA1_MOUSE Protein SOGA1 OS=Mus musculus GN=Soga1 PE=1 SV=3	2	10	10	10	5	5	6	3	5	5	6	3	5	5	6	3	7.7	7.7	7.7	183.14	1654	1654;1418	12	10	6	5	33	1.0645e-19	1.7153	1.8404	138.46	14	17.459	21.273	135.37	4	1.4351	1.3838	31.541	3	2.2021	2.2064
Q9QXG2;A2AD03;Q3UR39	Q9QXG2;A2AD03;Q3UR39	6;6;4	6;6;4	6;6;4	Rab proteins geranylgeranyltransferase component A 1	Chm	>sp|Q9QXG2|RAE1_MOUSE Rab proteins geranylgeranyltransferase component A 1 OS=Mus musculus GN=Chm PE=2 SV=1;>tr|A2AD03|A2AD03_MOUSE Choroidermia OS=Mus musculus GN=Chm PE=4 SV=1;>tr|Q3UR39|Q3UR39_MOUSE Choroidermia OS=Mus musculus GN=Chm PE=2 SV=1	3	6	6	6	3	1	4	2	3	1	4	2	3	1	4	2	14.9	14.9	14.9	73.976	665	665;662;623	4	1	8	3	16	1.2394e-11	1.1497	1.1255	32.674	15	0.58908	0.72829	19.918	4	NaN	NaN	NaN	0	1.2846	1.1787
A2ADA5	A2ADA5	2	2	2	tRNA pseudouridine synthase-like 1	Pusl1	>sp|A2ADA5|PUSL1_MOUSE tRNA pseudouridine synthase-like 1 OS=Mus musculus GN=Pusl1 PE=2 SV=1	1	2	2	2	1	0	2	0	1	0	2	0	1	0	2	0	8.2	8.2	8.2	31.992	291	291	2		4		6	1.33e-05	0.85135	0.9702	104.12	4	1.5916	2.4075	3.5024	2	NaN	NaN	NaN	0	0.45892	0.39677
A2ADH1;F6WHL0;Q9CQY5;F6TBV1;Q9CQY5-3;Q9CQY5-2	A2ADH1;F6WHL0;Q9CQY5;F6TBV1;Q9CQY5-3;Q9CQY5-2	7;7;7;6;6;6	7;7;7;6;6;6	7;7;7;6;6;6	Magnesium transporter protein 1	Magt1	>tr|A2ADH1|A2ADH1_MOUSE Magnesium transporter 1 OS=Mus musculus GN=Magt1 PE=4 SV=1;>tr|F6WHL0|F6WHL0_MOUSE Magnesium transporter protein 1 (Fragment) OS=Mus musculus GN=Magt1 PE=4 SV=1;>sp|Q9CQY5|MAGT1_MOUSE Magnesium transporter protein 1 OS=Mus musculus	6	7	7	7	6	2	7	2	6	2	7	2	6	2	7	2	24.5	24.5	24.5	41.637	368	368;343;335;312;312;306	18	4	12	4	38	8.8465e-44	1.2014	1.8222	52.239	33	1.3209	1.9398	12.259	16	1.178	1.7736	6.5913	4	0.72556	0.65261
Q8R3G1;A2ADR8	Q8R3G1;A2ADR8	6;6	6;6	6;6	Nuclear inhibitor of protein phosphatase 1	Ppp1r8	>sp|Q8R3G1|PP1R8_MOUSE Nuclear inhibitor of protein phosphatase 1 OS=Mus musculus GN=Ppp1r8 PE=1 SV=1;>tr|A2ADR8|A2ADR8_MOUSE Nuclear inhibitor of protein phosphatase 1 OS=Mus musculus GN=Ppp1r8 PE=4 SV=1	2	6	6	6	2	4	6	0	2	4	6	0	2	4	6	0	29.3	29.3	29.3	38.527	351	351;350	2	5	8		15	7.6857e-110	0.98147	1.1229	45.542	15	0.63594	0.96305	21.712	2	0.46269	0.57931	26.929	5	1.3313	1.3033
A2ADY9	A2ADY9	5	5	5	Protein DDI1 homolog 2	Ddi2	>sp|A2ADY9|DDI2_MOUSE Protein DDI1 homolog 2 OS=Mus musculus GN=Ddi2 PE=1 SV=1	1	5	5	5	3	1	4	1	3	1	4	1	3	1	4	1	18.3	18.3	18.3	44.59	399	399	4	4	6	2	16	1.4777e-24	0.71228	0.96442	22.811	15	0.65404	1.0005	12.267	4	0.70841	0.93995	4.7995	3	0.83973	0.81738
A2AE27;Q9DBT5;A2AE22;F7ATG4;F7D159;F6WIB6;O08739;A2AE25	A2AE27;Q9DBT5	20;20;6;4;2;2;1;1	20;20;6;4;2;2;1;1	20;20;6;4;2;2;1;1	AMP deaminase 2	Ampd2	>tr|A2AE27|A2AE27_MOUSE AMP deaminase 2 OS=Mus musculus GN=Ampd2 PE=4 SV=1;>sp|Q9DBT5|AMPD2_MOUSE AMP deaminase 2 OS=Mus musculus GN=Ampd2 PE=1 SV=1	8	20	20	20	12	0	12	7	12	0	12	7	12	0	12	7	26.1	26.1	26.1	94.695	824	824;798;102;256;216;154;766;165	17		18	11	46	1.1454e-58	1.7377	1.7355	80.457	38	0.30664	0.43121	61.305	15	NaN	NaN	NaN	0	1.9947	2.0663
A2AEG2;Q80Z25	A2AEG2;Q80Z25	4;4	4;4	3;3	Oral-facial-digital syndrome 1 protein homolog	Ofd1	>tr|A2AEG2|A2AEG2_MOUSE Oral-facial-digital syndrome 1 gene homolog (Human) OS=Mus musculus GN=Ofd1 PE=4 SV=1;>sp|Q80Z25|OFD1_MOUSE Oral-facial-digital syndrome 1 protein homolog OS=Mus musculus GN=Ofd1 PE=1 SV=1	2	4	4	3	1	2	2	2	1	2	2	2	1	2	1	2	3.7	3.7	3	117.63	1019	1019;1017	5	3	5	3	16	3.0118e-13	0.96911	0.96975	3.8285	2	NaN	NaN	NaN	0	NaN	NaN	NaN	0	0.97006	0.94385
A2AEM2;Q99LI2	A2AEM2;Q99LI2	8;8	8;8	8;8	Chloride channel CLIC-like protein 1	Clcc1	>tr|A2AEM2|A2AEM2_MOUSE Chloride channel CLIC-like 1 OS=Mus musculus GN=Clcc1 PE=4 SV=1;>sp|Q99LI2|CLCC1_MOUSE Chloride channel CLIC-like protein 1 OS=Mus musculus GN=Clcc1 PE=1 SV=1	2	8	8	8	3	3	6	5	3	3	6	5	3	3	6	5	19.9	19.9	19.9	61.239	544	544;539	3	4	8	9	24	2.1371e-26	0.6957	0.7261	39.825	13	1.1652	1.6175	NaN	1	0.85179	1.1894	17.164	4	0.62234	0.6022
A2AES4;A2AES5;Q3U2S4;Q3U2S4-2;A2AES3	A2AES4;A2AES5;Q3U2S4;Q3U2S4-2;A2AES3	4;4;4;3;3	4;4;4;3;3	4;4;4;3;3	OTU domain-containing protein 5	Otud5	>tr|A2AES4|A2AES4_MOUSE OTU domain containing 5 OS=Mus musculus GN=Otud5 PE=4 SV=1;>tr|A2AES5|A2AES5_MOUSE OTU domain containing 5 OS=Mus musculus GN=Otud5 PE=4 SV=1;>sp|Q3U2S4|OTUD5_MOUSE OTU domain-containing protein 5 OS=Mus musculus GN=Otud5 PE=1 SV=2;	5	4	4	4	4	4	4	4	4	4	4	4	4	4	4	4	8.8	8.8	8.8	60.749	571	571;567;566;523;517	19	29	21	31	100	3.6947e-33	NaN	NaN	NaN	0	NaN	NaN	NaN	0	NaN	NaN	NaN	0	NaN	NaN
A2AEW1;Q64092;A2AEW0;Q64092-4;Q64092-2;Q64092-3;A2AEW2	A2AEW1;Q64092;A2AEW0;Q64092-4;Q64092-2;Q64092-3	3;3;3;3;2;2;1	3;3;3;3;2;2;1	3;3;3;3;2;2;1	Transcription factor E3	Tfe3	>tr|A2AEW1|A2AEW1_MOUSE Transcription factor E3 OS=Mus musculus GN=Tfe3 PE=4 SV=1;>sp|Q64092|TFE3_MOUSE Transcription factor E3 OS=Mus musculus GN=Tfe3 PE=1 SV=2;>tr|A2AEW0|A2AEW0_MOUSE Transcription factor E3 OS=Mus musculus GN=Tfe3 PE=4 SV=1;>sp|Q64092-4	7	3	3	3	3	1	2	2	3	1	2	2	3	1	2	2	6.3	6.3	6.3	61.475	572	572;572;537;537;467;432;136	19	7	16	16	58	1.436e-68	NaN	NaN	NaN	0	NaN	NaN	NaN	0	NaN	NaN	NaN	0	NaN	NaN
A2AEW8;Q8VD04;A2AEW9;A2AEW5;A2AEW6	A2AEW8;Q8VD04;A2AEW9	5;5;5;2;2	5;5;5;2;2	5;5;5;2;2	GRIP1-associated protein 1	Gripap1	>tr|A2AEW8|A2AEW8_MOUSE GRIP1 associated protein 1 OS=Mus musculus GN=Gripap1 PE=2 SV=1;>sp|Q8VD04|GRAP1_MOUSE GRIP1-associated protein 1 OS=Mus musculus GN=Gripap1 PE=1 SV=1;>tr|A2AEW9|A2AEW9_MOUSE GRIP1 associated protein 1 OS=Mus musculus GN=Gripap1 PE=	5	5	5	5	1	0	3	2	1	0	3	2	1	0	3	2	6	6	6	95.912	837	837;806;792;485;469	1		4	2	7	7.1815e-10	0.86061	0.89652	24.987	7	0.59647	0.77972	NaN	1	NaN	NaN	NaN	0	0.94296	0.95967
A2AEX6;A2AEX8;P97447;A2AEY1;A2AEY0;A2AEX9	A2AEX6;A2AEX8;P97447;A2AEY1	12;12;12;9;3;2	12;12;12;9;3;2	3;3;3;0;0;0	Four and a half LIM domains protein 1	Fhl1	>tr|A2AEX6|A2AEX6_MOUSE Four and a half LIM domains 1 OS=Mus musculus GN=Fhl1 PE=4 SV=1;>tr|A2AEX8|A2AEX8_MOUSE Four and a half LIM domains 1 OS=Mus musculus GN=Fhl1 PE=4 SV=1;>sp|P97447|FHL1_MOUSE Four and a half LIM domains protein 1 OS=Mus musculus GN=F	6	12	12	3	11	9	11	9	11	9	11	9	3	0	3	2	52.1	52.1	14.2	35.08	309	309;296;280;235;89;72	29	16	34	18	97	0	1.3513	1.2826	118.92	94	0.15935	0.22667	94.494	29	0.18446	0.25135	56.436	15	1.6113	1.4782
A2AF47	A2AF47	33	33	4	Dedicator of cytokinesis protein 11	Dock11	>sp|A2AF47|DOC11_MOUSE Dedicator of cytokinesis protein 11 OS=Mus musculus GN=Dock11 PE=1 SV=1	1	33	33	4	20	13	16	18	20	13	16	18	4	1	3	1	19.2	19.2	2.4	237.77	2073	2073	33	27	34	26	120	1.2593e-101	0.67984	0.83724	83.993	96	0.33085	0.40391	54.507	25	0.36721	0.40505	23.882	22	1.9168	1.9578
A2AF67;Q8BIK4-3	A2AF67	30;1	1;0	1;0		Dock11	>tr|A2AF67|A2AF67_MOUSE Dedicator of cytokinesis 11 OS=Mus musculus GN=Dock11 PE=4 SV=1	2	30	1	1	16	13	13	17	0	1	0	0	0	1	0	0	18.9	0.6	0.6	218.24	1902	1902;689		1			1	2.2039e-95	NaN	NaN	NaN	0	NaN	NaN	NaN	0	NaN	NaN	NaN	0	NaN	NaN
A2AFF6;O35638;Q3UQG8	A2AFF6;O35638	14;14;1	14;14;1	12;12;1	Cohesin subunit SA-2	Stag2	>tr|A2AFF6|A2AFF6_MOUSE Cohesin subunit SA-2 OS=Mus musculus GN=Stag2 PE=4 SV=1;>sp|O35638|STAG2_MOUSE Cohesin subunit SA-2 OS=Mus musculus GN=Stag2 PE=1 SV=3	3	14	14	12	5	5	8	9	5	5	8	9	4	4	7	8	14.6	14.6	13.2	145.7	1268	1268;1231;146	7	10	15	17	49	1.9797e-37	1.1703	1.1325	31.909	48	0.46645	0.65664	5.3519	6	0.57101	0.77996	28.409	10	1.2245	1.1788
A2AFJ8	A2AFJ8	3	1	1		Arhgef6	>tr|A2AFJ8|A2AFJ8_MOUSE Rac/Cdc42 guanine nucleotide exchange factor (GEF) 6 OS=Mus musculus GN=Arhgef6 PE=4 SV=1	1	3	1	1	2	3	2	2	0	1	0	0	0	1	0	0	5.8	2.9	2.9	55.13	483	483		1			1	6.6236e-191	NaN	NaN	NaN	0	NaN	NaN	NaN	0	NaN	NaN	NaN	0	NaN	NaN
A2AFQ0;Q7TMY8;Q7TMY8-3;Q7TMY8-4;Q7TMY8-2;F6XP90;F6UYC1	A2AFQ0;Q7TMY8;Q7TMY8-3;Q7TMY8-4;Q7TMY8-2	127;127;124;105;92;34;6	127;127;124;105;92;34;6	127;127;124;105;92;34;6	E3 ubiquitin-protein ligase HUWE1	Huwe1	>tr|A2AFQ0|A2AFQ0_MOUSE E3 ubiquitin-protein ligase HUWE1 OS=Mus musculus GN=Huwe1 PE=4 SV=1;>sp|Q7TMY8|HUWE1_MOUSE E3 ubiquitin-protein ligase HUWE1 OS=Mus musculus GN=Huwe1 PE=1 SV=5;>sp|Q7TMY8-3|HUWE1_MOUSE Isoform 3 of E3 ubiquitin-protein ligase HUWE1	7	127	127	127	70	60	112	88	70	60	112	88	70	60	112	88	38	38	38	482.69	4378	4378;4377;4362;3832;3364;1176;150	140	124	333	180	777	0	0.60153	0.58471	54.657	680	0.94653	1.3942	26.728	118	1.0874	1.4543	29.95	103	0.5454	0.49381
Q8BX17;A2AFQ9;F7CKD6	Q8BX17;A2AFQ9	42;42;5	1;1;0	1;1;0	Gem-associated protein 5	Gemin5	>sp|Q8BX17|GEMI5_MOUSE Gem-associated protein 5 OS=Mus musculus GN=Gemin5 PE=1 SV=2;>tr|A2AFQ9|A2AFQ9_MOUSE Gem (Nuclear organelle) associated protein 5 OS=Mus musculus GN=Gemin5 PE=4 SV=1	3	42	1	1	15	21	19	25	1	1	1	1	1	1	1	1	37.9	0.8	0.8	166.59	1502	1502;1501;177	1	1	2	4	8	1.2172e-184	NaN	NaN	NaN	0	NaN	NaN	NaN	0	NaN	NaN	NaN	0	NaN	NaN
A2AG58;A2AG58-2	A2AG58;A2AG58-2	6;6	6;6	6;6	Uncharacterized protein CXorf23 homolog		>sp|A2AG58|CX023_MOUSE Uncharacterized protein CXorf23 homolog OS=Mus musculus PE=2 SV=1;>sp|A2AG58-2|CX023_MOUSE Isoform 2 of Uncharacterized protein CXorf23 homolog OS=Mus musculus	2	6	6	6	2	2	4	2	2	2	4	2	2	2	4	2	8.6	8.6	8.6	90.11	752	752;674	4	2	7	5	18	2.6092e-17	NaN	NaN	NaN	0	NaN	NaN	NaN	0	NaN	NaN	NaN	0	NaN	NaN
A2AG68;Q64430	A2AG68;Q64430	8;8	8;8	8;8	Copper-transporting ATPase 1	Atp7a	>tr|A2AG68|A2AG68_MOUSE ATPase, Cu++ transporting, alpha polypeptide OS=Mus musculus GN=Atp7a PE=3 SV=1;>sp|Q64430|ATP7A_MOUSE Copper-transporting ATPase 1 OS=Mus musculus GN=Atp7a PE=1 SV=3	2	8	8	8	2	2	4	1	2	2	4	1	2	2	4	1	8.4	8.4	8.4	162.03	1492	1492;1491	2	3	4	1	10	1.7044e-18	0.89985	0.90841	24.918	6	NaN	NaN	NaN	0	1.1821	1.511	NaN	1	0.81095	0.84135
A2AGH6;A2AGH9;A2AGH6-2;A2AGH8;A2AGH6-3	A2AGH6;A2AGH9;A2AGH6-2;A2AGH8	11;11;11;11;3	11;11;11;11;3	10;10;10;10;2	Mediator of RNA polymerase II transcription subunit 12	Med12	>sp|A2AGH6|MED12_MOUSE Mediator of RNA polymerase II transcription subunit 12 OS=Mus musculus GN=Med12 PE=2 SV=1;>tr|A2AGH9|A2AGH9_MOUSE Mediator of RNA polymerase II transcription subunit 12 OS=Mus musculus GN=Med12 PE=4 SV=1;>sp|A2AGH6-2|MED12_MOUSE Isof	5	11	11	10	5	5	8	6	5	5	8	6	5	4	8	5	6.9	6.9	6.1	244.56	2190	2190;2182;2169;2157;866	10	8	9	12	39	4.8725e-30	1.2169	1.1422	33.703	23	0.67252	0.72825	12.932	7	0.54216	0.71017	60.684	3	1.2506	1.2354
E9PW34;A2AGL3;A2AGL3-2	E9PW34;A2AGL3;A2AGL3-2	8;8;8	8;8;8	7;7;7	Ryanodine receptor 3	Ryr3	>tr|E9PW34|E9PW34_MOUSE Ryanodine receptor 3 OS=Mus musculus GN=Ryr3 PE=4 SV=1;>sp|A2AGL3|RYR3_MOUSE Ryanodine receptor 3 OS=Mus musculus GN=Ryr3 PE=1 SV=1;>sp|A2AGL3-2|RYR3_MOUSE Isoform 2 of Ryanodine receptor 3 OS=Mus musculus GN=Ryr3	3	8	8	7	4	3	0	3	4	3	0	3	3	3	0	3	2	2	1.8	554.56	4888	4888;4863;4834	4	7		4	15	8.821e-13	0.94041	1.2506	59.014	13	0.58128	0.78662	60.724	2	0.9478	1.3821	59.557	7	NaN	NaN
Q9D9K3;A2AGL5	Q9D9K3;A2AGL5	1;1	1;1	1;1	Cell death regulator Aven	Aven	>sp|Q9D9K3|AVEN_MOUSE Cell death regulator Aven OS=Mus musculus GN=Aven PE=1 SV=2;>tr|A2AGL5|A2AGL5_MOUSE Apoptosis, caspase activation inhibitor OS=Mus musculus GN=Aven PE=4 SV=1	2	1	1	1	1	0	1	0	1	0	1	0	1	0	1	0	6.4	6.4	6.4	37.195	342	342;217	2		1		3	1.1526e-07	0.55277	0.90639	13.922	3	0.54861	0.87986	4.2002	2	NaN	NaN	NaN	0	1.1706	1.1136
Q9DCL4;A2AGM2	Q9DCL4;A2AGM2	1;1	1;1	1;1	Probable methyltransferase-like protein 15	Mettl15	>sp|Q9DCL4|MET15_MOUSE Probable methyltransferase-like protein 15 OS=Mus musculus GN=Mettl15 PE=2 SV=2;>tr|A2AGM2|A2AGM2_MOUSE Methyltransferase 5 domain containing 1 (Fragment) OS=Mus musculus GN=Mettl15 PE=4 SV=1	2	1	1	1	0	0	1	0	0	0	1	0	0	0	1	0	5.4	5.4	5.4	45.281	406	406;230			1		1	0.000722	0.70467	0.80049	NaN	1	NaN	NaN	NaN	0	NaN	NaN	NaN	0	0.70467	0.80049
A2AGQ4;E9QN47;Q80U28-14;A2AGQ6;A2AGQ5;A2AGR0;Q80U28;A2AGQ9;Q80U28-15;A2AGQ7;Q80U28-2;A2AGQ8;Q80U28-3;A2AGQ2;A2AGQ3;Q80U28-4;Q80U28-5;Q80U28-6;Q80U28-7;Q80U28-8;Q80U28-9;Q80U28-10;Q80U28-11;A2AGR1;Q80U28-12;A6PWP8;Q80U28-13	A2AGQ4;E9QN47;Q80U28-14;A2AGQ6;A2AGQ5;A2AGR0;Q80U28;A2AGQ9;Q80U28-15;A2AGQ7;Q80U28-2;A2AGQ8;Q80U28-3;A2AGQ2;A2AGQ3;Q80U28-4;Q80U28-5;Q80U28-6;Q80U28-7;Q80U28-8;Q80U28-9;Q80U28-10;Q80U28-11;A2AGR1;Q80U28-12;A6PWP8;Q80U28-13	3;3;3;3;3;3;3;3;3;3;3;3;3;3;3;3;3;3;3;3;3;3;3;3;3;3;3	3;3;3;3;3;3;3;3;3;3;3;3;3;3;3;3;3;3;3;3;3;3;3;3;3;3;3	3;3;3;3;3;3;3;3;3;3;3;3;3;3;3;3;3;3;3;3;3;3;3;3;3;3;3	MAP kinase-activating death domain protein	Madd	>tr|A2AGQ4|A2AGQ4_MOUSE MAP kinase-activating death domain protein OS=Mus musculus GN=Madd PE=4 SV=1;>tr|E9QN47|E9QN47_MOUSE MAP kinase-activating death domain protein OS=Mus musculus GN=Madd PE=4 SV=2;>sp|Q80U28-14|MADD_MOUSE Isoform 14 of MAP kinase-acti	27	3	3	3	0	1	2	1	0	1	2	1	0	1	2	1	1.8	1.8	1.8	181.18	1632	1632;1627;1627;1602;1593;1577;1577;1574;1574;1573;1567;1562;1558;1554;1541;1528;1525;1521;1509;1508;1506;1497;1489;1475;1128;1115;1115		2	2	4	8	4.0415e-08	1.3754	1.2035	NaN	1	NaN	NaN	NaN	0	NaN	NaN	NaN	0	1.3754	1.2035
A2AH75;Q60575-3	A2AH75;Q60575-3	11;11	5;5	5;5		Kif1b	>tr|A2AH75|A2AH75_MOUSE Kinesin family member 1B OS=Mus musculus GN=Kif1b PE=3 SV=1;>sp|Q60575-3|KIF1B_MOUSE Isoform 3 of Kinesin-like protein KIF1B OS=Mus musculus GN=Kif1b	2	11	5	5	4	5	8	7	2	2	4	4	2	2	4	4	9	3.4	3.4	130.05	1150	1150;1150	16	8	13	9	46	4.2052e-24	1.1725	1.1275	15.583	2	NaN	NaN	NaN	0	NaN	NaN	NaN	0	1.3749	1.2588
A2AH85;O08810;G3UZ34;G3UXK8	A2AH85;O08810;G3UZ34	46;46;45;4	45;45;44;3	45;45;44;3	116 kDa U5 small nuclear ribonucleoprotein component	Eftud2	>tr|A2AH85|A2AH85_MOUSE 116 kDa U5 small nuclear ribonucleoprotein component OS=Mus musculus GN=Eftud2 PE=4 SV=1;>sp|O08810|U5S1_MOUSE 116 kDa U5 small nuclear ribonucleoprotein component OS=Mus musculus GN=Eftud2 PE=2 SV=1;>tr|G3UZ34|G3UZ34_MOUSE 116 kDa	4	46	45	45	31	21	31	33	30	20	30	32	30	20	30	32	63.4	62.3	62.3	109.49	972	972;971;962;85	65	44	58	61	228	0	0.85648	0.94311	17.609	223	0.76877	1.0962	13.816	64	0.76838	1.0337	17.218	43	0.91218	0.86952
A2AHC3;A2AHC3-2;A2AHC4	A2AHC3	6;2;2	6;2;2	6;2;2	Calmodulin-regulated spectrin-associated protein 1	Camsap1	>sp|A2AHC3|CAMP1_MOUSE Calmodulin-regulated spectrin-associated protein 1 OS=Mus musculus GN=Camsap1 PE=1 SV=1	3	6	6	6	3	4	4	6	3	4	4	6	3	4	4	6	5.1	5.1	5.1	175.89	1581	1581;1082;1077	32	29	27	37	125	1.7509e-107	NaN	NaN	NaN	0	NaN	NaN	NaN	0	NaN	NaN	NaN	0	NaN	NaN
Q8BWJ3;A2AHQ7	Q8BWJ3;A2AHQ7	2;2	2;2	2;2	Phosphorylase b kinase regulatory subunit alpha, liver isoform	Phka2	>sp|Q8BWJ3|KPB2_MOUSE Phosphorylase b kinase regulatory subunit alpha, liver isoform OS=Mus musculus GN=Phka2 PE=1 SV=1;>tr|A2AHQ7|A2AHQ7_MOUSE Phosphorylase b kinase regulatory subunit alpha, liver isoform OS=Mus musculus GN=Phka2 PE=4 SV=1	2	2	2	2	1	1	2	1	1	1	2	1	1	1	2	1	2.9	2.9	2.9	138.49	1235	1235;1191	18	9	11	17	55	6.0722e-120	2.4635	2.3055	NaN	1	NaN	NaN	NaN	0	NaN	NaN	NaN	0	2.4635	2.3055
Q64373;Q64373-4;Q64373-3;Q9QWX2;Q64373-2;A2AHX9;A2AHX8;A2AHX7	Q64373;Q64373-4;Q64373-3;Q9QWX2;Q64373-2;A2AHX9;A2AHX8;A2AHX7	4;4;4;4;4;4;3;3	4;4;4;4;4;4;3;3	4;4;4;4;4;4;3;3	Bcl-2-like protein 1	Bcl2l1	>sp|Q64373|B2CL1_MOUSE Bcl-2-like protein 1 OS=Mus musculus GN=Bcl2l1 PE=1 SV=1;>sp|Q64373-4|B2CL1_MOUSE Isoform Bcl-X(delta-TM) of Bcl-2-like protein 1 OS=Mus musculus GN=Bcl2l1;>sp|Q64373-3|B2CL1_MOUSE Isoform Bcl-X(beta) of Bcl-2-like protein 1 OS=Mus m	8	4	4	4	2	0	4	0	2	0	4	0	2	0	4	0	18.9	18.9	18.9	26.132	233	233;214;209;188;170;154;96;78	3		7		10	1.7792e-23	1.0679	1.0193	8.7804	10	0.62654	0.92173	16.528	3	NaN	NaN	NaN	0	1.0922	1.0205
O88708;A2AI40;CON__Q2YDI2	O88708;A2AI40	3;3;1	3;3;1	3;3;1	Origin recognition complex subunit 4	Orc4	>sp|O88708|ORC4_MOUSE Origin recognition complex subunit 4 OS=Mus musculus GN=Orc4 PE=1 SV=2;>tr|A2AI40|A2AI40_MOUSE Origin recognition complex subunit 4 (Fragment) OS=Mus musculus GN=Orc4 PE=4 SV=1	3	3	3	3	1	1	2	2	1	1	2	2	1	1	2	2	10.9	10.9	10.9	49.981	433	433;238;436	2	2	3	4	11	1.7574e-08	1.5169	1.5091	53.296	9	0.4804	0.64118	24.814	2	0.49791	0.61619	3.9977	2	1.6531	1.6309
A2AI52;Q80U87	A2AI52;Q80U87	20;20	20;20	20;20	Ubiquitin carboxyl-terminal hydrolase;Ubiquitin carboxyl-terminal hydrolase 8	Usp8	>tr|A2AI52|A2AI52_MOUSE Ubiquitin carboxyl-terminal hydrolase OS=Mus musculus GN=Usp8 PE=3 SV=1;>sp|Q80U87|UBP8_MOUSE Ubiquitin carboxyl-terminal hydrolase 8 OS=Mus musculus GN=Usp8 PE=1 SV=2	2	20	20	20	6	12	16	15	6	12	16	15	6	12	16	15	21.6	21.6	21.6	123.89	1091	1091;1080	9	20	20	20	69	1.6482e-73	1.3032	1.3086	41.784	48	0.47007	0.68942	22.795	8	0.55626	0.72888	22.15	11	1.3847	1.3603
Q923J1;A2AI57;F6QKC0	Q923J1;A2AI57	6;6;1	6;6;1	6;6;1	Transient receptor potential cation channel subfamily M member 7	Trpm7	>sp|Q923J1|TRPM7_MOUSE Transient receptor potential cation channel subfamily M member 7 OS=Mus musculus GN=Trpm7 PE=1 SV=1;>tr|A2AI57|A2AI57_MOUSE Transient receptor potential cation channel subfamily M member 7 OS=Mus musculus GN=Trpm7 PE=4 SV=1	3	6	6	6	4	4	2	3	4	4	2	3	4	4	2	3	4	4	4	212.4	1863	1863;1862;268	16	19	14	24	73	1.2769e-27	0.88066	1.1929	NaN	1	NaN	NaN	NaN	0	0.88066	1.1929	NaN	1	NaN	NaN
Q9D711;A2AIH8	Q9D711;A2AIH8	2;2	2;2	2;2	Pirin	Pir	>sp|Q9D711|PIR_MOUSE Pirin OS=Mus musculus GN=Pir PE=2 SV=1;>tr|A2AIH8|A2AIH8_MOUSE Pirin (Fragment) OS=Mus musculus GN=Pir PE=3 SV=1	2	2	2	2	1	1	1	1	1	1	1	1	1	1	1	1	7.2	7.2	7.2	32.066	290	290;253	3	2	1	1	7	1.8314e-12	0.78803	0.858	44.337	4	NaN	NaN	NaN	0	0.87987	1.1696	4.1988	2	0.4858	0.48247
E9PZY8;A2AIV2;A2AIV2-2	E9PZY8;A2AIV2	5;5;2	5;5;2	5;5;2	Protein virilizer homolog	1110037F02Rik;Kiaa1429	>tr|E9PZY8|E9PZY8_MOUSE Protein 1110037F02Rik OS=Mus musculus GN=1110037F02Rik PE=4 SV=1;>sp|A2AIV2|VIR_MOUSE Protein virilizer homolog OS=Mus musculus GN=Kiaa1429 PE=1 SV=1	3	5	5	5	3	2	4	3	3	2	4	3	3	2	4	3	4.4	4.4	4.4	207.17	1861	1861;1811;1139	9	27	13	25	74	2.3651e-105	1.4245	1.4061	16.658	2	NaN	NaN	NaN	0	NaN	NaN	NaN	0	1.4245	1.4061
Q9JII1;A2AIX0	Q9JII1;A2AIX0	6;6	6;6	6;6	72 kDa inositol polyphosphate 5-phosphatase	Inpp5e	>sp|Q9JII1|INP5E_MOUSE 72 kDa inositol polyphosphate 5-phosphatase OS=Mus musculus GN=Inpp5e PE=1 SV=1;>tr|A2AIX0|A2AIX0_MOUSE 72 kDa inositol polyphosphate 5-phosphatase OS=Mus musculus GN=Inpp5e PE=4 SV=1	2	6	6	6	3	6	2	6	3	6	2	6	3	6	2	6	11.3	11.3	11.3	71.914	647	647;605	14	33	5	31	83	1.808e-16	NaN	NaN	NaN	0	NaN	NaN	NaN	0	NaN	NaN	NaN	0	NaN	NaN
A2AIX1;E9QAT4;F7BPW6;F6T8X6	A2AIX1;E9QAT4	21;21;10;1	21;21;10;1	21;21;10;1		Sec16a	>tr|A2AIX1|A2AIX1_MOUSE Protein Sec16a OS=Mus musculus GN=Sec16a PE=4 SV=1;>tr|E9QAT4|E9QAT4_MOUSE Protein Sec16a OS=Mus musculus GN=Sec16a PE=4 SV=1	4	21	21	21	10	14	9	10	10	14	9	10	10	14	9	10	13.2	13.2	13.2	256.47	2377	2377;2357;907;247	20	34	14	23	91	5.8712e-102	0.61373	0.65834	70.949	46	0.21639	0.32713	52.596	12	0.30772	0.4379	36.077	13	1.1998	1.1454
A2AJ15;A2AJ14	A2AJ15	10;1	10;1	10;1	Endoplasmic reticulum mannosyl-oligosaccharide 1,2-alpha-mannosidase	Man1b1	>sp|A2AJ15|MA1B1_MOUSE Endoplasmic reticulum mannosyl-oligosaccharide 1,2-alpha-mannosidase OS=Mus musculus GN=Man1b1 PE=2 SV=1	2	10	10	10	4	4	7	5	4	4	7	5	4	4	7	5	20.1	20.1	20.1	75.149	658	658;238	7	5	10	7	29	2.0676e-24	0.97006	1.0363	17.681	28	0.77058	1.0664	16.812	7	0.66038	0.87549	6.3681	5	1.1976	1.1454
Q3TIX6;A2AJ72;F7AM43;A2AJ71;F6S444	Q3TIX6;A2AJ72	13;13;2;2;1	11;11;2;2;1	11;11;2;2;1		Fubp3	>tr|Q3TIX6|Q3TIX6_MOUSE Protein Fubp3 OS=Mus musculus GN=Fubp3 PE=2 SV=1;>tr|A2AJ72|A2AJ72_MOUSE Far upstream element (FUSE) binding protein 3 OS=Mus musculus GN=Fubp3 PE=4 SV=1	5	13	11	11	10	5	5	5	8	5	3	5	8	5	3	5	30.6	29	29	61.959	575	575;569;264;97;185	15	5	5	5	30	1.1635e-68	0.44513	0.61191	59.989	24	0.36117	0.51147	36.117	12	0.42936	0.59975	18.137	5	1.5962	1.5002
A2AJG0;Q80UU2	A2AJG0;Q80UU2	3;3	3;3	3;3	Ribonuclease P protein subunit p38	Rpp38	>tr|A2AJG0|A2AJG0_MOUSE Ribonuclease P protein subunit p38 OS=Mus musculus GN=Rpp38 PE=4 SV=1;>sp|Q80UU2|RPP38_MOUSE Ribonuclease P protein subunit p38 OS=Mus musculus GN=Rpp38 PE=2 SV=1	2	3	3	3	2	0	3	0	2	0	3	0	2	0	3	0	21.1	21.1	21.1	31.189	280	280;280	3		3		6	7.2518e-38	0.75765	0.94642	19.072	6	0.48782	0.74736	11.518	3	NaN	NaN	NaN	0	1.0631	1.0071
O70311;A2AJH3;Q8CFK1	O70311;A2AJH3;Q8CFK1	17;17;15	13;13;11	13;13;11	Glycylpeptide N-tetradecanoyltransferase 2;Glycylpeptide N-tetradecanoyltransferase	Nmt2	>sp|O70311|NMT2_MOUSE Glycylpeptide N-tetradecanoyltransferase 2 OS=Mus musculus GN=Nmt2 PE=1 SV=1;>tr|A2AJH3|A2AJH3_MOUSE Glycylpeptide N-tetradecanoyltransferase OS=Mus musculus GN=Nmt2 PE=3 SV=1;>tr|Q8CFK1|Q8CFK1_MOUSE Glycylpeptide N-tetradecanoyltrans	3	17	13	13	12	6	9	9	10	5	6	7	10	5	6	7	47.1	37.2	37.2	60.484	529	529;498;485	20	5	14	12	51	0	1.7928	1.6144	92.651	37	0.21646	0.34007	23.963	12	0.27298	0.36043	25.302	4	2.3815	2.2023
A2AJI0;A8Y5P4;A2AJI0-2;A2AJI1;F6WF36	A2AJI0;A8Y5P4;A2AJI0-2;A2AJI1;F6WF36	31;31;29;28;23	31;31;29;28;23	31;31;29;28;23	MAP7 domain-containing protein 1	Map7d1;Mtap7d1	>sp|A2AJI0|MA7D1_MOUSE MAP7 domain-containing protein 1 OS=Mus musculus GN=Map7d1 PE=1 SV=1;>tr|A8Y5P4|A8Y5P4_MOUSE Microtubule-associated protein 7 domain containing 1 OS=Mus musculus GN=Mtap7d1 PE=4 SV=1;>sp|A2AJI0-2|MA7D1_MOUSE Isoform 2 of MAP7 domain-	5	31	31	31	21	21	22	17	21	21	22	17	21	21	22	17	41.8	41.8	41.8	93.275	846	846;814;809;774;591	117	80	116	89	402	0	0.86089	1.0188	19.796	51	0.83969	1.1512	13.405	10	0.82309	1.0628	14.119	12	0.95624	0.91459
A2AJQ0;A2AJP9;Q3UV70	A2AJQ0;A2AJP9;Q3UV70	5;3;3	5;3;3	2;0;0	[Pyruvate dehydrogenase [acetyl-transferring]]-phosphatase 1, mitochondrial	Pdp1	>tr|A2AJQ0|A2AJQ0_MOUSE Protein phosphatase 2C, magnesium dependent, catalytic subunit OS=Mus musculus GN=Pdp1 PE=3 SV=2;>tr|A2AJP9|A2AJP9_MOUSE MCG54027, isoform CRA_a OS=Mus musculus GN=Pdp1 PE=3 SV=2;>sp|Q3UV70|PDP1_MOUSE [Pyruvate dehydrogenase [acetyl	3	5	5	2	3	1	3	0	3	1	3	0	1	1	1	0	7.5	7.5	1.8	67.615	597	597;563;538	5	1	3		9	8.6534e-21	2.2612	3.045	135.14	5	2.6685	3.9064	23.052	3	NaN	NaN	NaN	0	0.35605	0.33323
A2AJT5;A2AJT4;A2AJT3	A2AJT5;A2AJT4;A2AJT3	5;4;3	5;4;3	5;4;3	Arginine/serine-rich protein PNISR	Sfrs18;Pnisr	>tr|A2AJT5|A2AJT5_MOUSE Protein Sfrs18 OS=Mus musculus GN=Sfrs18 PE=4 SV=1;>sp|A2AJT4|PNISR_MOUSE Arginine/serine-rich protein PNISR OS=Mus musculus GN=Pnisr PE=1 SV=1;>tr|A2AJT3|A2AJT3_MOUSE MCG2929, isoform CRA_a OS=Mus musculus GN=Sfrs18 PE=4 SV=1	3	5	5	5	4	2	3	2	4	2	3	2	4	2	3	2	5.2	5.2	5.2	93.194	814	814;805;373	15	11	10	10	46	1.8033e-12	0.6307	0.72119	21.861	2	0.46484	0.6179	NaN	1	NaN	NaN	NaN	0	0.85574	0.84175
Q8K2F0-2;Q8K2F0;A2AKA9	Q8K2F0-2;Q8K2F0;A2AKA9	2;2;2	1;1;1	1;1;1	Bromodomain-containing protein 3	Brd3	>sp|Q8K2F0-2|BRD3_MOUSE Isoform 2 of Bromodomain-containing protein 3 OS=Mus musculus GN=Brd3;>sp|Q8K2F0|BRD3_MOUSE Bromodomain-containing protein 3 OS=Mus musculus GN=Brd3 PE=1 SV=2;>tr|A2AKA9|A2AKA9_MOUSE Bromodomain containing 3 (Fragment) OS=Mus muscul	3	2	1	1	1	2	2	1	1	1	1	1	1	1	1	1	2.6	1.5	1.5	81.51	743	743;726;682	6	9	3	4	22	1.4301e-06	NaN	NaN	NaN	0	NaN	NaN	NaN	0	NaN	NaN	NaN	0	NaN	NaN
A2AKB9;A2AKB9-2;A2AKB9-4	A2AKB9;A2AKB9-2;A2AKB9-4	2;2;2	2;2;2	2;2;2	DDB1- and CUL4-associated factor 10	Dcaf10	>sp|A2AKB9|DCA10_MOUSE DDB1- and CUL4-associated factor 10 OS=Mus musculus GN=Dcaf10 PE=2 SV=1;>sp|A2AKB9-2|DCA10_MOUSE Isoform 2 of DDB1- and CUL4-associated factor 10 OS=Mus musculus GN=Dcaf10;>sp|A2AKB9-4|DCA10_MOUSE Isoform 4 of DDB1- and CUL4-associat	3	2	2	2	1	1	1	0	1	1	1	0	1	1	1	0	4.1	4.1	4.1	61.558	566	566;529;225	2	1	1		4	5.6029e-06	0.61368	0.89023	NaN	1	NaN	NaN	NaN	0	0.61368	0.89023	NaN	1	NaN	NaN
A2AKD7;Q61234	A2AKD7;Q61234	9;8	9;8	9;8	Alpha-1-syntrophin	Snta1	>tr|A2AKD7|A2AKD7_MOUSE Alpha-1-syntrophin OS=Mus musculus GN=Snta1 PE=4 SV=1;>sp|Q61234|SNTA1_MOUSE Alpha-1-syntrophin OS=Mus musculus GN=Snta1 PE=1 SV=1	2	9	9	9	4	4	6	3	4	4	6	3	4	4	6	3	24.8	24.8	24.8	53.282	499	499;503	12	16	21	17	66	5.5933e-84	0.49045	0.45216	100.05	15	3.3216	4.9466	7.9346	2	1.3776	1.9527	116.35	2	0.47864	0.44078
A2AKG8;E9PYJ6;A2AKG8-2	A2AKG8;E9PYJ6	20;19;4	20;19;4	19;18;4	Focadhesin	Focad;BC057079	>sp|A2AKG8|FOCAD_MOUSE Focadhesin OS=Mus musculus GN=Focad PE=2 SV=1;>tr|E9PYJ6|E9PYJ6_MOUSE Protein BC057079 OS=Mus musculus GN=BC057079 PE=4 SV=1	3	20	20	19	6	4	14	17	6	4	14	17	5	4	14	17	17.1	17.1	16.5	198.95	1798	1798;1712;335	12	5	22	25	64	1.8968e-56	0.84147	0.83333	24.036	64	1.0004	1.2684	11.768	12	0.95091	1.2031	17.144	5	0.77131	0.75654
A2AKG8-3	A2AKG8-3	2	1	1			>sp|A2AKG8-3|FOCAD_MOUSE Isoform 3 of Focadhesin OS=Mus musculus GN=Focad	1	2	1	1	2	1	1	1	1	1	1	1	1	1	1	1	13.2	7.4	7.4	23.097	204	204	1	2	2	1	6	1.202e-05	NaN	NaN	NaN	0	NaN	NaN	NaN	0	NaN	NaN	NaN	0	NaN	NaN
Q8JZX5;Q9D1G5;A2AKH7;B0R031	Q8JZX5;Q9D1G5;A2AKH7	4;4;4;1	4;4;4;1	4;4;4;1	Leucine-rich repeat-containing protein 57	Lrrc57	>tr|Q8JZX5|Q8JZX5_MOUSE Leucine rich repeat containing 57 OS=Mus musculus GN=Lrrc57 PE=2 SV=1;>sp|Q9D1G5|LRC57_MOUSE Leucine-rich repeat-containing protein 57 OS=Mus musculus GN=Lrrc57 PE=2 SV=1;>tr|A2AKH7|A2AKH7_MOUSE Leucine rich repeat containing 57 (Fr	4	4	4	4	3	2	3	2	3	2	3	2	3	2	3	2	18.8	18.8	18.8	26.726	239	239;239;219;124	5	3	6	2	16	1.0823e-11	0.90631	1.037	16.53	16	0.7196	1.0674	15.522	5	0.85267	1.171	29.066	3	1.0187	0.96289
A2AKU9	A2AKU9	15	1	1	ATP synthase gamma chain	Atp5c1	>tr|A2AKU9|A2AKU9_MOUSE ATP synthase gamma chain OS=Mus musculus GN=Atp5c1 PE=3 SV=1	1	15	1	1	11	11	15	12	1	1	1	1	1	1	1	1	49.8	4	4	32.77	297	297	1	2	2	1	6	4.199e-266	NaN	NaN	NaN	0	NaN	NaN	NaN	0	NaN	NaN	NaN	0	NaN	NaN
Q8BG05;A2AL12;A2AL13	Q8BG05;A2AL12	26;26;4	24;24;3	3;3;0	Heterogeneous nuclear ribonucleoprotein A3	Hnrnpa3	>sp|Q8BG05|ROA3_MOUSE Heterogeneous nuclear ribonucleoprotein A3 OS=Mus musculus GN=Hnrnpa3 PE=1 SV=1;>tr|A2AL12|A2AL12_MOUSE Heterogeneous nuclear ribonucleoprotein A3 OS=Mus musculus GN=Hnrnpa3 PE=4 SV=1	3	26	24	3	14	17	19	16	14	16	19	14	1	2	3	1	51.5	49.6	8.2	39.652	379	379;318;194	47	47	62	45	201	0	0.93618	1.0456	22.319	162	0.72022	0.82711	21.887	34	0.76833	0.96726	19.541	40	1.0569	1.1441
A2AL50;Q8C0I1;H3BKN2;A2AL49;H3BIY5;H3BJ14	A2AL50;Q8C0I1;H3BKN2;A2AL49	25;25;23;19;1;1	25;25;23;19;1;1	25;25;23;19;1;1	Alkyldihydroxyacetonephosphate synthase, peroxisomal	Agps	>tr|A2AL50|A2AL50_MOUSE Alkyldihydroxyacetonephosphate synthase, peroxisomal OS=Mus musculus GN=Agps PE=4 SV=1;>sp|Q8C0I1|ADAS_MOUSE Alkyldihydroxyacetonephosphate synthase, peroxisomal OS=Mus musculus GN=Agps PE=1 SV=1;>tr|H3BKN2|H3BKN2_MOUSE Alkyldihydro	6	25	25	25	22	16	17	17	22	16	17	17	22	16	17	17	48.6	48.6	48.6	74.342	671	671;645;568;508;57;24	75	44	66	55	240	0	0.91889	1.0157	24.405	133	0.8574	1.2139	23.236	43	0.84856	1.2011	26.374	23	0.95462	0.92687
Q8BSY0;A2AL85;Q8CBM2;A2AL81;Q3TU40;A2AL78;Q6P8S1;A2AL79;A2AL83;A2AL75;A2AL76;A2AL74;Q9CR06;A2AL77;A2AL71	Q8BSY0;A2AL85;Q8CBM2	31;31;30;2;2;2;2;2;2;1;1;1;1;1;1	31;31;30;2;2;2;2;2;2;1;1;1;1;1;1	30;30;29;2;2;2;2;2;2;1;1;1;1;1;1	Aspartyl/asparaginyl beta-hydroxylase	Asph	>sp|Q8BSY0|ASPH_MOUSE Aspartyl/asparaginyl beta-hydroxylase OS=Mus musculus GN=Asph PE=2 SV=1;>tr|A2AL85|A2AL85_MOUSE Aspartate-beta-hydroxylase OS=Mus musculus GN=Asph PE=4 SV=1;>tr|Q8CBM2|Q8CBM2_MOUSE Aspartate-beta-hydroxylase OS=Mus musculus GN=Asph PE	15	31	31	30	21	19	28	24	21	19	28	24	21	19	27	24	46	46	45.1	83.041	741	741;725;658;310;294;245;212;197;163;272;261;215;207;149;73	70	43	68	62	243	0	0.9153	1.0151	42.315	238	0.77305	1.0782	59.201	68	0.75324	1.0165	31.34	41	0.96542	0.9466
Q62276;A2ALA4;Q62276-2	Q62276;A2ALA4;Q62276-2	6;6;6	6;6;6	6;6;6	Mediator of RNA polymerase II transcription subunit 22	Med22	>sp|Q62276|MED22_MOUSE Mediator of RNA polymerase II transcription subunit 22 OS=Mus musculus GN=Med22 PE=2 SV=2;>tr|A2ALA4|A2ALA4_MOUSE Mediator complex subunit 22 (Fragment) OS=Mus musculus GN=Med22 PE=4 SV=1;>sp|Q62276-2|MED22_MOUSE Isoform 2 of Mediato	3	6	6	6	2	2	6	2	2	2	6	2	2	2	6	2	30.5	30.5	30.5	22.282	200	200;168;140	4	4	12	4	24	3.1931e-60	1.3078	1.2249	44.433	24	0.60613	0.89167	5.9518	4	0.55995	0.82221	67.348	4	1.3947	1.3144
A2ALA6;P09925	A2ALA6;P09925	2;2	2;2	2;2	Surfeit locus protein 1	Surf1	>tr|A2ALA6|A2ALA6_MOUSE Surfeit gene 1 OS=Mus musculus GN=Surf1 PE=4 SV=1;>sp|P09925|SURF1_MOUSE Surfeit locus protein 1 OS=Mus musculus GN=Surf1 PE=2 SV=3	2	2	2	2	1	0	2	0	1	0	2	0	1	0	2	0	12.7	12.7	12.7	38.497	338	338;306	1		3		4	6.7059e-27	1.2505	1.1438	40.503	4	0.54376	0.84585	NaN	1	NaN	NaN	NaN	0	1.7929	1.5466
Q8CBC7;Q8JZY1;A2ALH2;F6Q475	Q8CBC7;Q8JZY1;A2ALH2	6;6;6;2	6;6;6;2	6;6;6;2		Ftsj1	>tr|Q8CBC7|Q8CBC7_MOUSE Ftsj homolog 1 (E. coli) OS=Mus musculus GN=Ftsj1 PE=2 SV=1;>tr|Q8JZY1|Q8JZY1_MOUSE FtsJ homolog 1 (E. coli) OS=Mus musculus GN=Ftsj1 PE=2 SV=1;>tr|A2ALH2|A2ALH2_MOUSE Ftsj homolog 1 (E. coli) OS=Mus musculus GN=Ftsj1 PE=3 SV=1	4	6	6	6	2	1	5	0	2	1	5	0	2	1	5	0	25.9	25.9	25.9	35.585	324	324;322;308;111	4	1	8		13	7.7976e-16	0.59353	0.90255	57.042	11	0.49871	0.72884	27.174	4	0.37398	0.50179	NaN	1	1.2125	1.0935
Q0VF55;A2ALL9;Q8C048	Q0VF55;A2ALL9;Q8C048	10;10;10	1;1;1	1;1;1		Atp2b3	>tr|Q0VF55|Q0VF55_MOUSE ATPase, Ca++ transporting, plasma membrane 3 OS=Mus musculus GN=Atp2b3 PE=2 SV=1;>tr|A2ALL9|A2ALL9_MOUSE ATPase, Ca++ transporting, plasma membrane 3 OS=Mus musculus GN=Atp2b3 PE=3 SV=1;>tr|Q8C048|Q8C048_MOUSE ATPase, Ca++ transport	3	10	1	1	4	4	8	6	1	0	0	0	1	0	0	0	9.3	1.1	1.1	134.36	1220	1220;1173;1144	1				1	2.7644e-192	NaN	NaN	NaN	0	NaN	NaN	NaN	0	NaN	NaN	NaN	0	NaN	NaN
Q3V0C5-2;Q3V0C5-5;Q3V0C5;A2ALR9;A2ALR8;Q3V0C5-3;Q3V0C5-4	Q3V0C5-2;Q3V0C5-5;Q3V0C5;A2ALR9;A2ALR8;Q3V0C5-3;Q3V0C5-4	2;2;2;2;2;2;2	2;2;2;2;2;2;2	2;2;2;2;2;2;2	Ubiquitin carboxyl-terminal hydrolase 48	Usp48	>sp|Q3V0C5-2|UBP48_MOUSE Isoform 2 of Ubiquitin carboxyl-terminal hydrolase 48 OS=Mus musculus GN=Usp48;>sp|Q3V0C5-5|UBP48_MOUSE Isoform 5 of Ubiquitin carboxyl-terminal hydrolase 48 OS=Mus musculus GN=Usp48;>sp|Q3V0C5|UBP48_MOUSE Ubiquitin carboxyl-termin	7	2	2	2	0	0	2	0	0	0	2	0	0	0	2	0	2.7	2.7	2.7	123.72	1080	1080;1053;1052;1036;631;485;484			2		2	9.0002e-07	1.0251	1.001	68.902	2	NaN	NaN	NaN	0	NaN	NaN	NaN	0	1.0251	1.001
A7TU71;A2ALU4;A2ALU4-2	A7TU71;A2ALU4;A2ALU4-2	7;7;4	7;7;4	7;7;4	Protein Shroom2	Shroom2	>tr|A7TU71|A7TU71_MOUSE Protein Shroom2 OS=Mus musculus GN=Shroom2 PE=2 SV=1;>sp|A2ALU4|SHRM2_MOUSE Protein Shroom2 OS=Mus musculus GN=Shroom2 PE=1 SV=1;>sp|A2ALU4-2|SHRM2_MOUSE Isoform 2 of Protein Shroom2 OS=Mus musculus GN=Shroom2	3	7	7	7	4	5	7	4	4	5	7	4	4	5	7	4	5.6	5.6	5.6	165.26	1487	1487;1481;446	28	31	27	33	119	2.8257e-51	0.69004	0.71684	96.276	8	0.3136	0.39393	NaN	1	0.33169	0.38305	25.402	2	2.87	3.0794
A2ALW5;A2ALW5-2;F2Z3Z8;F2Z410;G3UZK1	A2ALW5;A2ALW5-2	7;5;1;1;1	7;5;1;1;1	7;5;1;1;1	DnaJ homolog subfamily C member 25	Dnajc25	>sp|A2ALW5|DJC25_MOUSE DnaJ homolog subfamily C member 25 OS=Mus musculus GN=Dnajc25 PE=2 SV=1;>sp|A2ALW5-2|DJC25_MOUSE Isoform 2 of DnaJ homolog subfamily C member 25 OS=Mus musculus GN=Dnajc25	5	7	7	7	4	2	5	2	4	2	5	2	4	2	5	2	28	28	28	41.937	357	357;238;159;152;150	5	3	6	4	18	1.1541e-20	0.6598	0.60854	95.386	18	2.301	2.9058	27.017	5	2.5825	3.3333	9.9452	3	0.44077	0.46376
A2AM05;A2AM05-4;A2AM05-3	A2AM05;A2AM05-4	3;3;1	3;3;1	3;3;1	Centlein	Cntln	>sp|A2AM05|CNTLN_MOUSE Centlein OS=Mus musculus GN=Cntln PE=1 SV=1;>sp|A2AM05-4|CNTLN_MOUSE Isoform 4 of Centlein OS=Mus musculus GN=Cntln	3	3	3	3	1	1	2	2	1	1	2	2	1	1	2	2	2.4	2.4	2.4	160.75	1397	1397;1396;262	1	8	2	5	16	2.2217e-07	1.0832	1.1539	53.69	4	2.3851	2.9935	NaN	1	NaN	NaN	NaN	0	0.91	1.0242
Q9R207;A2AMG5	Q9R207;A2AMG5	2;2	2;2	2;2	Nibrin	Nbn	>sp|Q9R207|NBN_MOUSE Nibrin OS=Mus musculus GN=Nbn PE=1 SV=1;>tr|A2AMG5|A2AMG5_MOUSE Nibrin (Fragment) OS=Mus musculus GN=Nbn PE=4 SV=1	2	2	2	2	1	1	2	1	1	1	2	1	1	1	2	1	3.1	3.1	3.1	83.794	751	751;548	12	9	16	11	48	7.7882e-10	2.2479	2.321	NaN	1	NaN	NaN	NaN	0	NaN	NaN	NaN	0	2.2479	2.321
Q80XI3-3;A2AMI2;Q80XI3;Q80XI3-4;Q80XI3-2;A2AMI7;A2AMI6;Q8BQR8;A2AMI4	Q80XI3-3;A2AMI2;Q80XI3;Q80XI3-4;Q80XI3-2;A2AMI7	14;14;14;14;14;10;3;1;1	9;9;9;9;9;5;3;1;1	9;9;9;9;9;5;3;1;1	Eukaryotic translation initiation factor 4 gamma 3	Eif4g3	>sp|Q80XI3-3|IF4G3_MOUSE Isoform 3 of Eukaryotic translation initiation factor 4 gamma 3 OS=Mus musculus GN=Eif4g3;>tr|A2AMI2|A2AMI2_MOUSE Eukaryotic translation initiation factor 4 gamma 3 OS=Mus musculus GN=Eif4g3 PE=4 SV=1;>sp|Q80XI3|IF4G3_MOUSE Eukaryo	9	14	9	9	9	6	12	5	4	3	8	2	4	3	8	2	10.6	7.5	7.5	176.06	1590	1590;1579;1579;1578;1560;1002;509;235;183	11	9	19	7	46	4.4641e-47	0.44384	0.44474	46.972	10	0.96538	1.127	NaN	1	0.8358	1.0262	NaN	1	0.39752	0.40133
F6VQ19;Q3UMG5;Q3UMG5-3;Q3UMG5-2;F7AAC3;A2AMP0	F6VQ19;Q3UMG5;Q3UMG5-3;Q3UMG5-2;F7AAC3;A2AMP0	1;1;1;1;1;1	1;1;1;1;1;1	1;1;1;1;1;1	Leucine-rich repeat and calponin homology domain-containing protein 2	Lrch2	>tr|F6VQ19|F6VQ19_MOUSE Leucine-rich repeat and calponin homology domain-containing protein 2 (Fragment) OS=Mus musculus GN=Lrch2 PE=4 SV=1;>sp|Q3UMG5|LRCH2_MOUSE Leucine-rich repeat and calponin homology domain-containing protein 2 OS=Mus musculus GN=Lrch	6	1	1	1	1	1	1	1	1	1	1	1	1	1	1	1	1.9	1.9	1.9	85.997	784	784;773;756;751;464;452	5	3	2	6	16	5.8754e-06	NaN	NaN	NaN	0	NaN	NaN	NaN	0	NaN	NaN	NaN	0	NaN	NaN
Q91VX2;A2AMY5;F6PYV5;A2AMY7;F6WTC8	Q91VX2;A2AMY5	17;17;5;2;1	17;17;5;2;1	17;17;5;2;1	Ubiquitin-associated protein 2	Ubap2	>sp|Q91VX2|UBAP2_MOUSE Ubiquitin-associated protein 2 OS=Mus musculus GN=Ubap2 PE=2 SV=1;>tr|A2AMY5|A2AMY5_MOUSE Ubiquitin-associated protein 2 OS=Mus musculus GN=Ubap2 PE=4 SV=1	5	17	17	17	11	7	10	9	11	7	10	9	11	7	10	9	23.5	23.5	23.5	117.96	1132	1132;1131;245;227;140	17	18	23	19	77	3.8708e-85	0.93606	0.93094	113.94	65	0.1649	0.23125	72.536	15	0.42264	0.55198	77.377	15	2.5375	2.4582
A2AN08;A2AN08-3;A2AN08-5;A2AN08-2;F6SSP6;A2AN08-4	A2AN08;A2AN08-3;A2AN08-5	210;210;207;94;73;19	210;210;207;94;73;19	210;210;207;94;73;19	E3 ubiquitin-protein ligase UBR4	Ubr4	>sp|A2AN08|UBR4_MOUSE E3 ubiquitin-protein ligase UBR4 OS=Mus musculus GN=Ubr4 PE=1 SV=1;>sp|A2AN08-3|UBR4_MOUSE Isoform 3 of E3 ubiquitin-protein ligase UBR4 OS=Mus musculus GN=Ubr4;>sp|A2AN08-5|UBR4_MOUSE Isoform 5 of E3 ubiquitin-protein ligase UBR4 OS=	6	210	210	210	121	117	183	147	121	117	183	147	121	117	183	147	50.3	50.3	50.3	572.28	5180	5180;5156;5208;2021;2065;474	272	246	503	303	1324	0	1.2668	1.1133	34.884	1183	0.49185	0.7521	22.238	225	0.51897	0.72531	26.192	227	1.3658	1.2836
Q8VEH2;A2AN61;Q3UUV0	Q8VEH2;A2AN61;Q3UUV0	1;1;1	1;1;1	1;1;1		Ciz1	>tr|Q8VEH2|Q8VEH2_MOUSE CDKN1A interacting zinc finger protein OS=Mus musculus GN=Ciz1 PE=2 SV=1;>tr|A2AN61|A2AN61_MOUSE CDKN1A interacting zinc finger protein OS=Mus musculus GN=Ciz1 PE=4 SV=1;>tr|Q3UUV0|Q3UUV0_MOUSE CDKN1A interacting zinc finger protein	3	1	1	1	1	1	1	1	1	1	1	1	1	1	1	1	1.5	1.5	1.5	93.552	845	845;821;791	4	5	5	2	16	0.00097653	NaN	NaN	NaN	0	NaN	NaN	NaN	0	NaN	NaN	NaN	0	NaN	NaN
A2ANX3	A2ANX3	1	1	1		Atp8b4	>tr|A2ANX3|A2ANX3_MOUSE ATPase, class I, type 8B, member 4 OS=Mus musculus GN=Atp8b4 PE=4 SV=1	1	1	1	1	1	0	1	0	1	0	1	0	1	0	1	0	1	1	1	135.14	1194	1194	3		3		6	0.0036113	1.1906	1.0776	148.73	6	5.9068	4.3444	5.3821	3	NaN	NaN	NaN	0	0.22421	0.28382
A2ANY6;J3QMC5	A2ANY6;J3QMC5	126;125	126;125	125;124	Midasin	Mdn1	>tr|A2ANY6|A2ANY6_MOUSE Midasin OS=Mus musculus GN=Mdn1 PE=3 SV=1;>tr|J3QMC5|J3QMC5_MOUSE Midasin OS=Mus musculus GN=Mdn1 PE=3 SV=1	2	126	126	125	57	36	105	73	57	36	105	73	56	35	105	72	30.1	30.1	30	630.33	5589	5589;5582	92	58	188	116	454	0	1.1884	1.0921	24.645	425	0.64982	0.9198	22.676	85	0.70186	0.89122	29.173	51	1.2668	1.1335
A2AP24;Q8K2H2;F6VDQ9	A2AP24;Q8K2H2	8;8;3	8;8;3	8;8;3	OTU domain-containing protein 6B	Otud6b	>tr|A2AP24|A2AP24_MOUSE OTU domain containing 6B OS=Mus musculus GN=Otud6b PE=4 SV=2;>sp|Q8K2H2|OTU6B_MOUSE OTU domain-containing protein 6B OS=Mus musculus GN=Otud6b PE=2 SV=1	3	8	8	8	7	2	6	3	7	2	6	3	7	2	6	3	33.8	33.8	33.8	37.187	325	325;294;118	11	3	11	3	28	5.848e-73	0.52449	0.75738	41.79	23	0.43263	0.67756	11.189	9	0.65299	0.80692	NaN	1	1.2158	1.113
A2APB8	A2APB8	9	9	9	Targeting protein for Xklp2	Tpx2	>sp|A2APB8|TPX2_MOUSE Targeting protein for Xklp2 OS=Mus musculus GN=Tpx2 PE=1 SV=1	1	9	9	9	7	5	8	6	7	5	8	6	7	5	8	6	11	11	11	85.893	745	745	47	31	34	27	139	2.3961e-51	0.84538	1.1467	28.236	3	0.84538	1.2894	NaN	1	NaN	NaN	NaN	0	0.78808	0.75361
A2APF7;Q9QY24;Q9QY24-2	A2APF7;Q9QY24;Q9QY24-2	4;4;2	4;4;2	4;4;2	Z-DNA-binding protein 1	Zbp1	>tr|A2APF7|A2APF7_MOUSE Z-DNA binding protein 1 OS=Mus musculus GN=Zbp1 PE=4 SV=1;>sp|Q9QY24|ZBP1_MOUSE Z-DNA-binding protein 1 OS=Mus musculus GN=Zbp1 PE=1 SV=1;>sp|Q9QY24-2|ZBP1_MOUSE Isoform 2 of Z-DNA-binding protein 1 OS=Mus musculus GN=Zbp1	3	4	4	4	2	3	0	3	2	3	0	3	2	3	0	3	15.6	15.6	15.6	44.271	411	411;411;187	2	8		4	14	1.5892e-30	0.81278	1.0272	NaN	1	NaN	NaN	NaN	0	0.81278	1.0272	NaN	1	NaN	NaN
Q9Z238;A2API1	Q9Z238;A2API1	1;1	1;1	1;1	G1/S-specific cyclin-E2	Ccne2	>sp|Q9Z238|CCNE2_MOUSE G1/S-specific cyclin-E2 OS=Mus musculus GN=Ccne2 PE=2 SV=1;>tr|A2API1|A2API1_MOUSE Cyclin E2 OS=Mus musculus GN=Ccne2 PE=3 SV=1	2	1	1	1	1	0	1	0	1	0	1	0	1	0	1	0	5	5	5	46.669	404	404;403	3		3		6	5.4919e-05	NaN	NaN	NaN	0	NaN	NaN	NaN	0	NaN	NaN	NaN	0	NaN	NaN
Q80V86;A2API3	Q80V86;A2API3	2;2	2;2	2;2	Integrator complex subunit 8	Ints8	>sp|Q80V86|INT8_MOUSE Integrator complex subunit 8 OS=Mus musculus GN=Ints8 PE=2 SV=1;>tr|A2API3|A2API3_MOUSE Integrator complex subunit 8 OS=Mus musculus GN=Ints8 PE=4 SV=1	2	2	2	2	0	0	2	0	0	0	2	0	0	0	2	0	4.1	4.1	4.1	113.35	995	995;978			2		2	1.4599e-05	1.0591	1.0185	11.949	2	NaN	NaN	NaN	0	NaN	NaN	NaN	0	1.0591	1.0185
A2API5;Q9JI18;E9Q202	A2API5;Q9JI18;E9Q202	4;4;4	1;1;1	1;1;1	Low-density lipoprotein receptor-related protein 1B	Lrp1b	>tr|A2API5|A2API5_MOUSE Low density lipoprotein-related protein 1B (Deleted in tumors) OS=Mus musculus GN=Lrp1b PE=4 SV=1;>sp|Q9JI18|LRP1B_MOUSE Low-density lipoprotein receptor-related protein 1B OS=Mus musculus GN=Lrp1b PE=2 SV=1;>tr|E9Q202|E9Q202_MOUSE	3	4	1	1	4	3	4	3	1	1	1	1	1	1	1	1	0.7	0.2	0.2	517.03	4630	4630;4599;3357	2	2	3	2	9	4.4086e-12	0.64127	0.74268	65.144	9	1.3461	1.8355	24.094	2	1.2668	1.7277	3.2921	2	0.62393	0.47404
F7AA26;A2API8;O54931;O54931-2;O54931-4;O54931-5;O54931-3;A2API9;A2APJ1	F7AA26;A2API8;O54931;O54931-2;O54931-4;O54931-5;O54931-3	16;16;15;15;14;14;13;2;1	16;16;15;15;14;14;13;2;1	16;16;15;15;14;14;13;2;1	A-kinase anchor protein 2	Gm20459;Akap2	>tr|F7AA26|F7AA26_MOUSE Protein Gm20459 (Fragment) OS=Mus musculus GN=Gm20459 PE=4 SV=1;>tr|A2API8|A2API8_MOUSE A kinase (PRKA) anchor protein 2 OS=Mus musculus GN=Akap2 PE=4 SV=1;>sp|O54931|AKAP2_MOUSE A-kinase anchor protein 2 OS=Mus musculus GN=Akap2 PE	9	16	16	16	10	3	8	6	10	3	8	6	10	3	8	6	20.7	20.7	20.7	125.98	1137	1137;921;893;880;769;756;795;187;177	30	18	23	16	87	1.6801e-77	1.4271	1.3657	74.239	21	0.25125	0.37615	18.167	7	0.252	0.31836	NaN	1	1.5706	1.568
A2APM2;P15379;P15379-7;P15379-8;A2APM1;P15379-4;P15379-9;P15379-10;Q80X37;E9QKM8;P15379-5;P15379-11;A2APM4;P15379-6;A2APM3;P15379-3;A2APM5;Q3U8S1;P15379-2;P15379-13;P15379-12	A2APM2;P15379;P15379-7;P15379-8;A2APM1;P15379-4;P15379-9;P15379-10;Q80X37;E9QKM8;P15379-5;P15379-11;A2APM4;P15379-6;A2APM3;P15379-3;A2APM5;Q3U8S1;P15379-2	8;8;8;8;8;8;8;8;8;8;8;8;8;8;8;8;8;8;8;2;2	8;8;8;8;8;8;8;8;8;8;8;8;8;8;8;8;8;8;8;2;2	8;8;8;8;8;8;8;8;8;8;8;8;8;8;8;8;8;8;8;2;2	CD44 antigen	Cd44	>tr|A2APM2|A2APM2_MOUSE CD44 antigen OS=Mus musculus GN=Cd44 PE=4 SV=1;>sp|P15379|CD44_MOUSE CD44 antigen OS=Mus musculus GN=Cd44 PE=1 SV=3;>sp|P15379-7|CD44_MOUSE Isoform 2 of CD44 antigen OS=Mus musculus GN=Cd44;>sp|P15379-8|CD44_MOUSE Isoform 3 of CD44	21	8	8	8	8	5	8	5	8	5	8	5	8	5	8	5	10.1	10.1	10.1	85.837	780	780;778;736;697;657;654;617;616;580;577;576;575;498;496;464;461;434;365;363;592;580	103	57	96	65	321	2.4776e-56	0.91213	1.008	17.227	54	0.74736	1.1334	15.944	17	0.8616	1.2109	7.9677	9	1.0137	0.91926
A2APY7;A2APY7-2	A2APY7;A2APY7-2	2;1	2;1	2;1	Probable methyltransferase C20orf7 homolog, mitochondrial		>sp|A2APY7|NDUF5_MOUSE NADH dehydrogenase [ubiquinone] 1 alpha subcomplex assembly factor 5 OS=Mus musculus GN=Ndufaf5 PE=2 SV=1;>sp|A2APY7-2|NDUF5_MOUSE Isoform 2 of NADH dehydrogenase [ubiquinone] 1 alpha subcomplex assembly factor 5 OS=Mus musculus GN=N	2	2	2	2	1	0	2	0	1	0	2	0	1	0	2	0	10.2	10.2	10.2	38.404	343	343;156	1		2		3	8.3857e-06	0.95052	0.9881	13.434	3	0.72479	1.1399	NaN	1	NaN	NaN	NaN	0	0.99795	0.92798
A2AQ19	A2AQ19	1	1	1	RNA polymerase-associated protein RTF1 homolog	Rtf1	>sp|A2AQ19|RTF1_MOUSE RNA polymerase-associated protein RTF1 homolog OS=Mus musculus GN=Rtf1 PE=2 SV=1	1	1	1	1	0	0	1	1	0	0	1	1	0	0	1	1	2	2	2	80.796	715	715			1	1	2	0.00041663	1.6158	1.5649	1.9366	2	NaN	NaN	NaN	0	NaN	NaN	NaN	0	1.5963	1.5436
Q80TY0;A2AQ41;A2AQ45;A2AQ42;A2AQ44;A2AQ43;Q80TY0-3;Q80TY0-2;Q80TY0-4;Q80TY0-5;A2AQ47;F6VVN1	Q80TY0;A2AQ41;A2AQ45;A2AQ42;A2AQ44;A2AQ43;Q80TY0-3;Q80TY0-2;Q80TY0-4;Q80TY0-5;A2AQ47	6;6;5;5;5;5;5;5;4;4;3;1	6;6;5;5;5;5;5;5;4;4;3;1	6;6;5;5;5;5;5;5;4;4;3;1	Formin-binding protein 1	Fnbp1	>sp|Q80TY0|FNBP1_MOUSE Formin-binding protein 1 OS=Mus musculus GN=Fnbp1 PE=1 SV=2;>tr|A2AQ41|A2AQ41_MOUSE Formin binding protein 1 OS=Mus musculus GN=Fnbp1 PE=4 SV=1;>tr|A2AQ45|A2AQ45_MOUSE Formin binding protein 1 OS=Mus musculus GN=Fnbp1 PE=4 SV=1;>tr|A	12	6	6	6	1	4	5	4	1	4	5	4	1	4	5	4	17.4	17.4	17.4	71.343	616	616;615;591;586;559;554;551;550;522;338;160;388	6	11	10	12	39	3.17e-27	1.0893	1.0617	15.602	6	NaN	NaN	NaN	0	0.57872	0.74198	NaN	1	1.0815	1.0243
A2AQ53	A2AQ53	67	67	8		Fbn1	>tr|A2AQ53|A2AQ53_MOUSE Fibrillin 1 OS=Mus musculus GN=Fbn1 PE=4 SV=1	1	67	67	8	25	22	62	23	25	22	62	23	3	5	5	3	30.1	30.1	3.8	312.3	2873	2873	46	42	118	33	239	0	0.6939	0.8253	63.141	225	1.7188	2.4519	15.801	41	1.7229	2.1647	48.181	35	0.62668	0.76932
Q8CFQ3;A2AQA7	Q8CFQ3;A2AQA7	3;3	3;3	3;3	Intron-binding protein aquarius	Aqr	>sp|Q8CFQ3|AQR_MOUSE Intron-binding protein aquarius OS=Mus musculus GN=Aqr PE=2 SV=2;>tr|A2AQA7|A2AQA7_MOUSE Aquarius OS=Mus musculus GN=Aqr PE=4 SV=1	2	3	3	3	0	2	3	3	0	2	3	3	0	2	3	3	3.9	3.9	3.9	170.29	1481	1481;1400		4	5	6	15	1.2507e-12	1.1849	1.1908	10.804	15	NaN	NaN	NaN	0	0.93524	1.197	15.034	4	1.2624	1.1731
Q922B9;A2AQD6;Q922B9-3;A2AQD5	Q922B9;A2AQD6;Q922B9-3;A2AQD5	2;2;2;1	2;2;2;1	2;2;2;1	Sperm-specific antigen 2 homolog	Ssfa2	>sp|Q922B9|SSFA2_MOUSE Sperm-specific antigen 2 homolog OS=Mus musculus GN=Ssfa2 PE=1 SV=3;>tr|A2AQD6|A2AQD6_MOUSE Sperm specific antigen 2 OS=Mus musculus GN=Ssfa2 PE=4 SV=1;>sp|Q922B9-3|SSFA2_MOUSE Isoform 3 of Sperm-specific antigen 2 homolog OS=Mus mus	4	2	2	2	1	2	1	2	1	2	1	2	1	2	1	2	2.4	2.4	2.4	136.95	1252	1252;1219;1101;1230	21	24	19	23	87	4.3724e-22	NaN	NaN	NaN	0	NaN	NaN	NaN	0	NaN	NaN	NaN	0	NaN	NaN
P16951;P16951-2;G3UXC3;A2AQE9;P16951-3;F6Z2B2;A2AQF0	P16951;P16951-2;G3UXC3;A2AQE9;P16951-3;F6Z2B2	3;3;3;3;2;2;1	3;3;3;3;2;2;1	3;3;3;3;2;2;1	Cyclic AMP-dependent transcription factor ATF-2	Atf2	>sp|P16951|ATF2_MOUSE Cyclic AMP-dependent transcription factor ATF-2 OS=Mus musculus GN=Atf2 PE=1 SV=2;>sp|P16951-2|ATF2_MOUSE Isoform 2 of Cyclic AMP-dependent transcription factor ATF-2 OS=Mus musculus GN=Atf2;>tr|G3UXC3|G3UXC3_MOUSE Cyclic AMP-dependen	7	3	3	3	2	3	2	2	2	3	2	2	2	3	2	2	8.8	8.8	8.8	52.297	487	487;389;377;207;447;212;229	4	11	6	10	31	0	NaN	NaN	NaN	0	NaN	NaN	NaN	0	NaN	NaN	NaN	0	NaN	NaN
A2AQN4;A2AQN5;Q9QXG4;F7CU63;D6RHA7	A2AQN4;A2AQN5;Q9QXG4	10;10;10;3;3	10;10;10;3;3	10;10;10;3;3	Acetyl-coenzyme A synthetase, cytoplasmic	Acss2	>tr|A2AQN4|A2AQN4_MOUSE Acetyl-coenzyme A synthetase, cytoplasmic OS=Mus musculus GN=Acss2 PE=4 SV=1;>tr|A2AQN5|A2AQN5_MOUSE Acetyl-coenzyme A synthetase, cytoplasmic OS=Mus musculus GN=Acss2 PE=4 SV=1;>sp|Q9QXG4|ACSA_MOUSE Acetyl-coenzyme A synthetase, cy	5	10	10	10	6	6	5	6	6	6	5	6	6	6	5	6	21.8	21.8	21.8	80.386	714	714;706;701;293;124	52	40	45	59	196	6.3606e-163	1.6666	1.8415	48.662	22	0.57881	0.90456	31.356	5	1.3385	1.836	62.853	5	2.1866	2.0647
A2AQU8;Q9D975	A2AQU8;Q9D975	3;3	3;3	3;3	Sulfiredoxin-1	Srxn1	>tr|A2AQU8|A2AQU8_MOUSE Sulfiredoxin 1 homolog (S. cerevisiae) OS=Mus musculus GN=Srxn1 PE=4 SV=1;>sp|Q9D975|SRXN1_MOUSE Sulfiredoxin-1 OS=Mus musculus GN=Srxn1 PE=2 SV=1	2	3	3	3	0	2	0	3	0	2	0	3	0	2	0	3	31.6	31.6	31.6	16.063	155	155;136		3		7	10	1.1773e-15	1.0646	0.98437	8.1275	10	NaN	NaN	NaN	0	0.65553	0.94275	7.22	3	NaN	NaN
A2AR02;A2AR01	A2AR02	5;1	5;1	5;1	Peptidyl-prolyl cis-trans isomerase G	Ppig	>sp|A2AR02|PPIG_MOUSE Peptidyl-prolyl cis-trans isomerase G OS=Mus musculus GN=Ppig PE=1 SV=1	2	5	5	5	0	3	2	4	0	3	2	4	0	3	2	4	4.4	4.4	4.4	88.324	752	752;127		6	5	9	20	1.574e-12	1.4804	1.3374	NaN	1	NaN	NaN	NaN	0	NaN	NaN	NaN	0	1.4804	1.3374
Q8BKH7;A2AR12;Q8BKH7-2;Q8BKH7-3	Q8BKH7;A2AR12;Q8BKH7-2;Q8BKH7-3	3;3;3;2	3;3;3;2	3;3;3;2	Target of rapamycin complex 2 subunit MAPKAP1	Mapkap1	>sp|Q8BKH7|SIN1_MOUSE Target of rapamycin complex 2 subunit MAPKAP1 OS=Mus musculus GN=Mapkap1 PE=1 SV=1;>tr|A2AR12|A2AR12_MOUSE Mitogen-activated protein kinase associated protein 1 (Fragment) OS=Mus musculus GN=Mapkap1 PE=4 SV=1;>sp|Q8BKH7-2|SIN1_MOUSE I	4	3	3	3	2	2	2	1	2	2	2	1	2	2	2	1	4.2	4.2	4.2	59.008	522	522;518;486;330	5	2	5	1	13	7.141e-08	0.49743	0.66672	0.51324	2	0.47344	0.66915	NaN	1	0.52265	0.66431	NaN	1	NaN	NaN
O54819;A2ARA0	O54819;A2ARA0	1;1	1;1	1;1	Tissue factor pathway inhibitor	Tfpi	>sp|O54819|TFPI1_MOUSE Tissue factor pathway inhibitor OS=Mus musculus GN=Tfpi PE=2 SV=1;>tr|A2ARA0|A2ARA0_MOUSE Tissue factor pathway inhibitor OS=Mus musculus GN=Tfpi PE=4 SV=1	2	1	1	1	1	1	1	1	1	1	1	1	1	1	1	1	5.2	5.2	5.2	34.986	306	306;300	9	6	9	12	36	6.9671e-88	1.5626	1.5725	53.663	35	0.48827	0.61146	8.4505	8	0.59576	0.66165	4.2009	6	1.6328	1.7516
Q8C0L0;A2ARI0	Q8C0L0;A2ARI0	2;2	2;2	2;2	Thioredoxin-related transmembrane protein 4	Tmx4	>sp|Q8C0L0|TMX4_MOUSE Thioredoxin-related transmembrane protein 4 OS=Mus musculus GN=Tmx4 PE=1 SV=2;>tr|A2ARI0|A2ARI0_MOUSE Thioredoxin domain containing 13 OS=Mus musculus GN=Tmx4 PE=4 SV=1	2	2	2	2	2	1	2	1	2	1	2	1	2	1	2	1	7.5	7.5	7.5	37.131	335	335;183	3	2	3	2	10	1.4617e-05	0.67365	0.71479	53.241	10	0.9171	1.2845	33.825	3	1.1417	1.475	10.054	2	0.46311	0.48178
A2ARP1;A2ARP1-2;A2ARP1-3;F6RMX0;F6VID9;F7AST3;F6Q5C6;A2ARP1-7	A2ARP1;A2ARP1-2;A2ARP1-3;F6RMX0	5;5;5;3;2;2;2;1	3;3;3;2;1;2;1;0	3;3;3;2;1;2;1;0	Inositol hexakisphosphate and diphosphoinositol-pentakisphosphate kinase 1	Ppip5k1	>sp|A2ARP1|VIP1_MOUSE Inositol hexakisphosphate and diphosphoinositol-pentakisphosphate kinase 1 OS=Mus musculus GN=Ppip5k1 PE=2 SV=1;>sp|A2ARP1-2|VIP1_MOUSE Isoform 2 of Inositol hexakisphosphate and diphosphoinositol-pentakisphosphate kinase 1 OS=Mus mus	8	5	3	3	2	3	2	3	2	1	1	2	2	1	1	2	3.9	2.2	2.2	159.92	1436	1436;1416;1415;198;284;271;257;671	3	1	4	3	11	7.5731e-57	0.67367	1.0206	29.016	3	0.67367	1.0206	NaN	1	0.74382	1.1011	NaN	1	NaN	NaN
A2ARP8;Q9QYR6-2;Q9QYR6	A2ARP8;Q9QYR6-2;Q9QYR6	88;88;88	86;86;86	86;86;86	Microtubule-associated protein 1A;MAP1 light chain LC2	Mtap1a;Map1a	>tr|A2ARP8|A2ARP8_MOUSE Microtubule-associated protein 1 A OS=Mus musculus GN=Mtap1a PE=4 SV=1;>sp|Q9QYR6-2|MAP1A_MOUSE Isoform 2 of Microtubule-associated protein 1A OS=Mus musculus GN=Map1a;>sp|Q9QYR6|MAP1A_MOUSE Microtubule-associated protein 1A OS=Mus	3	88	86	86	40	55	71	57	38	53	69	55	38	53	69	55	38.2	37.4	37.4	325.88	3014	3014;3000;2776	189	191	233	222	835	0	1.1565	1.223	76.443	306	0.4489	0.61751	53.565	58	0.30602	0.41055	50.736	69	1.6492	1.8797
A2ARV4;A2ARV5	A2ARV4	4;1	4;1	4;1	Low-density lipoprotein receptor-related protein 2	Lrp2	>sp|A2ARV4|LRP2_MOUSE Low-density lipoprotein receptor-related protein 2 OS=Mus musculus GN=Lrp2 PE=1 SV=1	2	4	4	4	1	2	4	0	1	2	4	0	1	2	4	0	0.8	0.8	0.8	519.2	4660	4660;1363	6	2	10		18	1.6772e-14	0.9079	0.90686	47.801	4	NaN	NaN	NaN	0	1.4146	2.0649	NaN	1	0.8875	0.85631
A2AS03;E9QAM5;A2AS05	A2AS03;E9QAM5;A2AS05	23;23;23	23;23;23	23;23;23		BC006779	>tr|A2AS03|A2AS03_MOUSE Novel protein, possible orthologue of human peroxisomal proliferator-activated receptor A interacting complex 285 PRIC285 OS=Mus musculus GN=BC006779 PE=4 SV=1;>tr|E9QAM5|E9QAM5_MOUSE Protein BC006779 OS=Mus musculus GN=BC006779 PE=	3	23	23	23	10	5	16	11	10	5	16	11	10	5	16	11	11.4	11.4	11.4	334	2970	2970;2947;2903	19	10	28	21	78	4.0528e-178	2.1512	2.0647	102.27	76	0.2514	0.37419	30.045	19	0.30422	0.38419	13.421	10	2.9122	3.104
Q68FH0;A2AS45;Q68FH0-2;A2AS44	Q68FH0;A2AS45;Q68FH0-2;A2AS44	5;5;5;4	5;5;5;4	3;3;3;3	Plakophilin-4	Pkp4	>sp|Q68FH0|PKP4_MOUSE Plakophilin-4 OS=Mus musculus GN=Pkp4 PE=1 SV=1;>tr|A2AS45|A2AS45_MOUSE Plakophilin 4 OS=Mus musculus GN=Pkp4 PE=4 SV=1;>sp|Q68FH0-2|PKP4_MOUSE Isoform 2 of Plakophilin-4 OS=Mus musculus GN=Pkp4;>tr|A2AS44|A2AS44_MOUSE Plakophilin 4 (	4	5	5	3	2	4	2	3	2	4	2	3	2	2	2	3	4.8	4.8	2.4	131.55	1190	1190;1163;1147;803	10	13	7	10	40	2.9891e-40	NaN	NaN	NaN	0	NaN	NaN	NaN	0	NaN	NaN	NaN	0	NaN	NaN
A2AS47;Q68FH0-3	A2AS47;Q68FH0-3	3;2	1;1	1;1		Pkp4	>tr|A2AS47|A2AS47_MOUSE Plakophilin 4 OS=Mus musculus GN=Pkp4 PE=4 SV=1;>sp|Q68FH0-3|PKP4_MOUSE Isoform 3 of Plakophilin-4 OS=Mus musculus GN=Pkp4	2	3	1	1	0	2	1	0	0	0	1	0	0	0	1	0	4.9	1.6	1.6	95.208	849	849;296			1		1	9.6557e-07	NaN	NaN	NaN	0	NaN	NaN	NaN	0	NaN	NaN	NaN	0	NaN	NaN
O54826;A2AS70;A2AS72	O54826;A2AS70;A2AS72	1;1;1	1;1;1	1;1;1	Protein AF-10	Mllt10	>sp|O54826|AF10_MOUSE Protein AF-10 OS=Mus musculus GN=Mllt10 PE=1 SV=2;>tr|A2AS70|A2AS70_MOUSE Myeloid/lymphoid or mixed lineage-leukemia translocation to 10 homolog (Drosophila) OS=Mus musculus GN=Mllt10 PE=4 SV=1;>tr|A2AS72|A2AS72_MOUSE Myeloid/lymphoid	3	1	1	1	1	1	1	1	1	1	1	1	1	1	1	1	0.8	0.8	0.8	113.03	1068	1068;990;525	5	4	4	6	19	1.6953e-06	NaN	NaN	NaN	0	NaN	NaN	NaN	0	NaN	NaN	NaN	0	NaN	NaN
Q8C3Q9;A2AS93;A2AS92	Q8C3Q9;A2AS93;A2AS92	1;1;1	1;1;1	1;1;1	Caspase	Casp9	>tr|Q8C3Q9|Q8C3Q9_MOUSE Caspase OS=Mus musculus GN=Casp9 PE=2 SV=1;>tr|A2AS93|A2AS93_MOUSE Caspase OS=Mus musculus GN=Casp9 PE=3 SV=1;>tr|A2AS92|A2AS92_MOUSE Caspase 9 (Fragment) OS=Mus musculus GN=Casp9 PE=4 SV=1	3	1	1	1	0	1	0	0	0	1	0	0	0	1	0	0	5.7	5.7	5.7	49.979	454	454;405;215		1			1	4.3991e-10	0.39954	0.54299	NaN	1	NaN	NaN	NaN	0	0.39954	0.54299	NaN	1	NaN	NaN
A2AS98;P28660;P28660-2	A2AS98;P28660;P28660-2	35;35;32	35;35;32	33;33;30	Nck-associated protein 1	Nckap1	>tr|A2AS98|A2AS98_MOUSE NCK-associated protein 1 OS=Mus musculus GN=Nckap1 PE=4 SV=1;>sp|P28660|NCKP1_MOUSE Nck-associated protein 1 OS=Mus musculus GN=Nckap1 PE=1 SV=2;>sp|P28660-2|NCKP1_MOUSE Isoform 2 of Nck-associated protein 1 OS=Mus musculus GN=Nckap	3	35	35	33	26	22	25	15	26	22	25	15	26	20	23	14	38.7	38.7	36.9	129.51	1134	1134;1128;1037	61	45	61	40	207	0	0.86766	1.0006	13.931	205	0.74476	1.0725	10.59	60	0.79223	1.0355	12.965	45	0.95409	0.92692
A2ASS6;A2ASS6-2	A2ASS6;A2ASS6-2	45;36	1;1	1;1	Titin	Ttn	>sp|A2ASS6|TITIN_MOUSE Titin OS=Mus musculus GN=Ttn PE=1 SV=1;>sp|A2ASS6-2|TITIN_MOUSE Isoform 2 of Titin OS=Mus musculus GN=Ttn	2	45	1	1	12	15	10	19	0	0	1	0	0	0	1	0	1.4	0	0	3906.4	35213	35213;26886			1		1	1.799e-69	1.0205	1.0761	NaN	1	NaN	NaN	NaN	0	NaN	NaN	NaN	0	1.0205	1.0761
Q5HZG4;A2ASY0;Q5HZG4-2	Q5HZG4;A2ASY0	5;5;1	5;5;1	5;5;1	Transcription initiation factor TFIID subunit 3	Taf3	>sp|Q5HZG4|TAF3_MOUSE Transcription initiation factor TFIID subunit 3 OS=Mus musculus GN=Taf3 PE=1 SV=2;>tr|A2ASY0|A2ASY0_MOUSE TAF3 RNA polymerase II, TATA box binding protein (TBP)-associated factor OS=Mus musculus GN=Taf3 PE=4 SV=1	3	5	5	5	4	4	5	4	4	4	5	4	4	4	5	4	7	7	7	105.11	932	932;779;191	32	27	20	24	103	1.6126e-17	NaN	NaN	NaN	0	NaN	NaN	NaN	0	NaN	NaN	NaN	0	NaN	NaN
A2AT37;F6Q3G7	A2AT37	11;4	11;4	11;4		Upf2	>tr|A2AT37|A2AT37_MOUSE Protein Upf2 OS=Mus musculus GN=Upf2 PE=2 SV=1	2	11	11	11	4	6	7	5	4	6	7	5	4	6	7	5	12.1	12.1	12.1	147.55	1269	1269;523	5	8	12	6	31	2.3308e-54	1.0289	1.0101	43.378	31	0.49347	0.69233	5.8494	5	0.47904	0.6262	41.076	8	1.3746	1.3601
Q99JX3;A2ATI9;Q99JX3-2;A2ATI6;A2ATI8	Q99JX3;A2ATI9;Q99JX3-2;A2ATI6;A2ATI8	12;12;10;9;9	12;12;10;9;9	12;12;10;9;9	Golgi reassembly-stacking protein 2	Gorasp2	>sp|Q99JX3|GORS2_MOUSE Golgi reassembly-stacking protein 2 OS=Mus musculus GN=Gorasp2 PE=1 SV=3;>tr|A2ATI9|A2ATI9_MOUSE Golgi reassembly stacking protein 2 OS=Mus musculus GN=Gorasp2 PE=4 SV=1;>sp|Q99JX3-2|GORS2_MOUSE Isoform 2 of Golgi reassembly-stacking	5	12	12	12	8	10	11	10	8	10	11	10	8	10	11	10	37.5	37.5	37.5	47.038	451	451;431;383;351;317	23	34	30	31	118	0	0.66149	0.94302	75.683	84	0.53281	0.81468	86.412	13	0.5888	0.83691	65.387	26	1.2432	1.1732
A2ATK9;A2ATL0;A2ATL1	A2ATK9;A2ATL0;A2ATL1	5;5;5	5;5;5	5;5;5		Fam171a1	>tr|A2ATK9|A2ATK9_MOUSE Family with sequence similarity 171, member A1 OS=Mus musculus GN=Fam171a1 PE=2 SV=1;>tr|A2ATL0|A2ATL0_MOUSE Family with sequence similarity 171, member A1 OS=Mus musculus GN=Fam171a1 PE=4 SV=1;>tr|A2ATL1|A2ATL1_MOUSE Family with se	3	5	5	5	3	2	4	4	3	2	4	4	3	2	4	4	7.4	7.4	7.4	97.961	892	892;887;767	15	12	10	13	50	4.4358e-15	NaN	NaN	NaN	0	NaN	NaN	NaN	0	NaN	NaN	NaN	0	NaN	NaN
Q8C854;Q8C854-3;A2ATP6;A2ATP5;Q8C854-2;G8JL68;Q8C854-1;F6XJA1	Q8C854;Q8C854-3;A2ATP6;A2ATP5;Q8C854-2;G8JL68;Q8C854-1;F6XJA1	16;16;16;16;14;13;13;12	16;16;16;16;14;13;13;12	16;16;16;16;14;13;13;12	Myelin expression factor 2	Myef2	>sp|Q8C854|MYEF2_MOUSE Myelin expression factor 2 OS=Mus musculus GN=Myef2 PE=1 SV=1;>sp|Q8C854-3|MYEF2_MOUSE Isoform 2 of Myelin expression factor 2 OS=Mus musculus GN=Myef2;>tr|A2ATP6|A2ATP6_MOUSE Myelin basic protein expression factor 2, repressor OS=Mu	8	16	16	16	8	5	14	7	8	5	14	7	8	5	14	7	37.7	37.7	37.7	63.294	591	591;574;567;550;498;530;488;446	17	9	26	14	66	4.7441e-91	0.99954	1.0451	24.224	66	0.7593	1.0902	39.208	17	0.72472	0.96964	18.95	9	1.0992	1.0284
A2ATU0	A2ATU0	1	1	1	Probable 2-oxoglutarate dehydrogenase E1 component DHKTD1, mitochondrial	Dhtkd1	>sp|A2ATU0|DHTK1_MOUSE Probable 2-oxoglutarate dehydrogenase E1 component DHKTD1, mitochondrial OS=Mus musculus GN=Dhtkd1 PE=2 SV=1	1	1	1	1	0	1	0	1	0	1	0	1	0	1	0	1	2.7	2.7	2.7	102.79	921	921		1		1	2	1.0991e-07	0.61921	0.67966	102.4	2	NaN	NaN	NaN	0	1.1098	1.402	NaN	1	NaN	NaN
Q64012;A2AU62;Q64012-2;A2AU61;A2AU60	Q64012;A2AU62;Q64012-2;A2AU61;A2AU60	11;11;11;10;7	11;11;11;10;7	11;11;11;10;7	RNA-binding protein Raly	Raly;C130057N11Rik	>sp|Q64012|RALY_MOUSE RNA-binding protein Raly OS=Mus musculus GN=Raly PE=1 SV=3;>tr|A2AU62|A2AU62_MOUSE HnRNP-associated with lethal yellow (Fragment) OS=Mus musculus GN=C130057N11Rik PE=4 SV=1;>sp|Q64012-2|RALY_MOUSE Isoform 1 of RNA-binding protein Raly	5	11	11	11	6	5	10	5	6	5	10	5	6	5	10	5	31.7	31.7	31.7	33.188	312	312;298;296;211;141	75	48	67	71	261	3.5647e-268	0.96056	1.0613	46.425	22	0.72725	1.1307	17.932	6	0.77727	0.93377	22.861	2	1.0922	0.99039
A2AU91;P70399;A2AU89;P70399-3;A2AU90;P70399-2;F6QNC8;F6ZRL3;F6S5E4;F7CE65	A2AU91;P70399;A2AU89;P70399-3;A2AU90	18;18;17;17;11;7;5;2;1;1	18;18;17;17;11;7;5;2;1;1	18;18;17;17;11;7;5;2;1;1	Tumor suppressor p53-binding protein 1	Trp53bp1;Tp53bp1	>tr|A2AU91|A2AU91_MOUSE Protein Trp53bp1 OS=Mus musculus GN=Trp53bp1 PE=4 SV=1;>sp|P70399|TP53B_MOUSE Tumor suppressor p53-binding protein 1 OS=Mus musculus GN=Tp53bp1 PE=1 SV=2;>tr|A2AU89|A2AU89_MOUSE Protein Trp53bp1 OS=Mus musculus GN=Trp53bp1 PE=4 SV=2	10	18	18	18	10	11	7	14	10	11	7	14	10	11	7	14	13.1	13.1	13.1	212.73	1969	1969;1957;1919;1913;1018;1014;190;166;81;48	58	56	26	73	213	0	0.27974	0.4072	85.219	13	0.21337	0.32293	20.264	5	0.28939	0.4072	44.889	5	NaN	NaN
A2AUD5;Q9CYZ2;Q3TAI4	A2AUD5;Q9CYZ2;Q3TAI4	17;17;17	17;17;17	4;4;4	Tumor protein D54	Tpd52l2	>tr|A2AUD5|A2AUD5_MOUSE Tumor protein D52-like 2 OS=Mus musculus GN=Tpd52l2 PE=4 SV=1;>sp|Q9CYZ2|TPD54_MOUSE Tumor protein D54 OS=Mus musculus GN=Tpd52l2 PE=1 SV=1;>tr|Q3TAI4|Q3TAI4_MOUSE Tumor protein D52-like 2 OS=Mus musculus GN=Tpd52l2 PE=2 SV=1	3	17	17	4	14	14	16	16	14	14	16	16	4	3	4	4	63.3	63.3	12.7	25.067	229	229;220;206	74	69	93	66	302	0	0.7991	0.94904	29.675	151	0.69561	1.0846	20.763	31	0.71416	1.0124	25.898	44	0.87758	0.82962
A2AUK5;A2AUK8;Q9Z2H5;Q9Z2H5-2;Q9Z2H5-3;A2AUK7;A2AUK6	A2AUK5;A2AUK8;Q9Z2H5;Q9Z2H5-2;Q9Z2H5-3;A2AUK7;A2AUK6	13;13;10;10;8;8;8	11;11;8;8;6;6;7	7;7;5;5;3;2;3	Band 4.1-like protein 1	Epb4.1l1;Epb41l1	>tr|A2AUK5|A2AUK5_MOUSE Erythrocyte protein band 4.1-like 1 OS=Mus musculus GN=Epb4.1l1 PE=4 SV=1;>tr|A2AUK8|A2AUK8_MOUSE Erythrocyte protein band 4.1-like 1 OS=Mus musculus GN=Epb4.1l1 PE=4 SV=1;>sp|Q9Z2H5|E41L1_MOUSE Band 4.1-like protein 1 OS=Mus muscul	7	13	11	7	11	7	7	9	10	6	5	8	7	6	4	6	19.2	17	10.2	98.314	879	879;867;879;867;731;730;631	53	37	34	53	177	6.8867e-177	0.40108	0.5673	0.27726	4	0.40108	0.5673	0.27726	4	NaN	NaN	NaN	0	NaN	NaN
A2AUM0;Q9QZ05;A2AUM1;Q9QZ05-3;Q9QZ05-2;A2AUM2;A2AUL9;Q9QZ05-4;Q9QZ05-6;Q9QZ05-5	A2AUM0;Q9QZ05;A2AUM1;Q9QZ05-3;Q9QZ05-2;A2AUM2;A2AUL9;Q9QZ05-4;Q9QZ05-6	6;6;5;5;5;5;4;3;3;1	6;6;5;5;5;5;4;3;3;1	6;6;5;5;5;5;4;3;3;1	Eukaryotic translation initiation factor 2-alpha kinase 4	Eif2ak4	>tr|A2AUM0|A2AUM0_MOUSE Eukaryotic translation initiation factor 2 alpha kinase 4 OS=Mus musculus GN=Eif2ak4 PE=4 SV=1;>sp|Q9QZ05|E2AK4_MOUSE Eukaryotic translation initiation factor 2-alpha kinase 4 OS=Mus musculus GN=Eif2ak4 PE=1 SV=2;>tr|A2AUM1|A2AUM1_M	10	6	6	6	1	1	5	1	1	1	5	1	1	1	5	1	5.9	5.9	5.9	186.5	1648	1648;1648;1570;1570;1536;1527;653;1370;532;347	1	2	9	1	13	8.7956e-14	1.2747	1.2346	14.147	4	NaN	NaN	NaN	0	NaN	NaN	NaN	0	1.2747	1.2346
A7UAK5;A7UAK8;A2AUP4;A2AUP5;Q7TS91;A2AUP1;A2AUP3	A7UAK5;A7UAK8;A2AUP4;A2AUP5;Q7TS91;A2AUP1;A2AUP3	1;1;1;1;1;1;1	1;1;1;1;1;1;1	1;1;1;1;1;1;1		Pfkfb3	>tr|A7UAK5|A7UAK5_MOUSE 6-phosphofructo-2-kinase/fructose-2, 6-biphosphatase 3 splice variant 2 OS=Mus musculus GN=Pfkfb3 PE=2 SV=1;>tr|A7UAK8|A7UAK8_MOUSE 6-phosphofructo-2-kinase/fructose-2, 6-biphosphatase 3 splice variant 5 OS=Mus musculus GN=Pfkfb3 PE	7	1	1	1	0	0	1	1	0	0	1	1	0	0	1	1	2.5	2.5	2.5	63.652	555	555;543;542;535;526;520;513			1	2	3	2.0573e-05	NaN	NaN	NaN	0	NaN	NaN	NaN	0	NaN	NaN	NaN	0	NaN	NaN
Q3UHC7;B7ZD29;A2AUX3;A2AUX4;A2AUX5;F6RK07;Q3UHC7-2;Q3UHC7-3	Q3UHC7;B7ZD29;A2AUX3;A2AUX4;A2AUX5;F6RK07;Q3UHC7-2;Q3UHC7-3	5;5;5;5;5;5;5;4	5;5;5;5;5;5;5;4	2;2;2;2;2;2;2;1	Disabled homolog 2-interacting protein	Dab2ip	>sp|Q3UHC7|DAB2P_MOUSE Disabled homolog 2-interacting protein OS=Mus musculus GN=Dab2ip PE=1 SV=1;>tr|B7ZD29|B7ZD29_MOUSE Disabled homolog 2 (Drosophila) interacting protein OS=Mus musculus GN=Dab2ip PE=4 SV=1;>tr|A2AUX3|A2AUX3_MOUSE Disabled homolog 2 (Dr	8	5	5	2	3	4	4	1	3	4	4	1	2	1	2	0	6.3	6.3	1.9	131.72	1189	1189;1154;1132;1132;1124;1083;1065;1138	14	7	10	3	34	2.3667e-19	0.76343	0.96702	NaN	1	NaN	NaN	NaN	0	0.76343	0.96702	NaN	1	NaN	NaN
A2AUY4;F6R4Y5;A2AUY3	A2AUY4	6;2;1	6;2;1	6;2;1		Baz2b	>tr|A2AUY4|A2AUY4_MOUSE Bromodomain adjacent to zinc finger domain, 2B OS=Mus musculus GN=Baz2b PE=4 SV=1	3	6	6	6	3	2	5	2	3	2	5	2	3	2	5	2	3	3	3	234	2123	2123;253;296	15	12	27	14	68	6.3444e-20	0.82594	0.80857	29.15	5	NaN	NaN	NaN	0	NaN	NaN	NaN	0	0.86024	0.83817
A2AVJ5;B0R106;B0R105;B0R102;B0R103	A2AVJ5;B0R106;B0R105;B0R102;B0R103	1;1;1;1;1	1;1;1;1;1	1;1;1;1;1	Proline-rich protein 5-like	Prr5l	>sp|A2AVJ5|PRR5L_MOUSE Proline-rich protein 5-like OS=Mus musculus GN=Prr5l PE=2 SV=1;>tr|B0R106|B0R106_MOUSE Novel protein (2600010E01Rik) (Fragment) OS=Mus musculus GN=Prr5l PE=4 SV=1;>tr|B0R105|B0R105_MOUSE Novel protein (2600010E01Rik) (Fragment) OS=Mu	5	1	1	1	1	1	1	1	1	1	1	1	1	1	1	1	3.2	3.2	3.2	40.982	370	370;128;95;51;37	4	6	5	4	19	1.4319e-06	NaN	NaN	NaN	0	NaN	NaN	NaN	0	NaN	NaN	NaN	0	NaN	NaN
Q99PL5;A2AVJ7;Q99PL5-2;Q99PL5-3;Q99PL5-4;Q99PL5-6;Q99PL5-7;Q99PL5-8;Q99PL5-5;Q99PL5-9;Q99PL5-10;Q99PL5-11;Q99PL5-12	Q99PL5;A2AVJ7	77;77;13;13;13;13;13;13;12;10;10;9;8	77;77;13;13;13;13;13;13;12;10;10;9;8	77;77;13;13;13;13;13;13;12;10;10;9;8	Ribosome-binding protein 1	Rrbp1	>sp|Q99PL5|RRBP1_MOUSE Ribosome-binding protein 1 OS=Mus musculus GN=Rrbp1 PE=2 SV=2;>tr|A2AVJ7|A2AVJ7_MOUSE Ribosome binding protein 1 OS=Mus musculus GN=Rrbp1 PE=4 SV=1	13	77	77	77	67	58	66	63	67	58	66	63	67	58	66	63	44.9	44.9	44.9	172.88	1605	1605;1464;842;701;641;380;380;330;398;284;250;229;209	401	295	430	268	1394	0	1.0972	1.2149	64.227	1328	1.7258	2.3532	30.517	381	1.6943	1.8957	24.448	286	0.56315	0.57022
Q8R3H9;A2AVQ9;A2AVR1	Q8R3H9;A2AVQ9;A2AVR1	1;1;1	1;1;1	1;1;1	Tetratricopeptide repeat protein 4	Ttc4	>sp|Q8R3H9|TTC4_MOUSE Tetratricopeptide repeat protein 4 OS=Mus musculus GN=Ttc4 PE=2 SV=1;>tr|A2AVQ9|A2AVQ9_MOUSE Tetratricopeptide repeat domain 4 OS=Mus musculus GN=Ttc4 PE=4 SV=1;>tr|A2AVR1|A2AVR1_MOUSE Tetratricopeptide repeat domain 4 (Fragment) OS=M	3	1	1	1	0	0	1	0	0	0	1	0	0	0	1	0	2.8	2.8	2.8	44.338	386	386;286;241			1		1	0.00012851	0.83779	0.84967	NaN	1	NaN	NaN	NaN	0	NaN	NaN	NaN	0	0.83779	0.84967
A2AW86;Q60767	A2AW86;Q60767	22;22	22;22	22;22	Lymphocyte antigen 75	Ly75	>tr|A2AW86|A2AW86_MOUSE Lymphocyte antigen 75 OS=Mus musculus GN=Ly75 PE=4 SV=1;>sp|Q60767|LY75_MOUSE Lymphocyte antigen 75 OS=Mus musculus GN=Ly75 PE=1 SV=2	2	22	22	22	12	12	13	18	12	12	13	18	12	12	13	18	15.8	15.8	15.8	197.38	1723	1723;1723	24	26	29	33	112	1.1654e-73	0.77315	0.88774	34.947	84	1.1367	1.361	17.251	17	1.2523	1.2648	20.192	18	0.66881	0.68777
A2AWA9;A2AWA9-2;A2AWA7;A2AWA9-3;A2AWB0;A6H6A9-3	A2AWA9;A2AWA9-2	33;21;14;9;2;1	33;21;14;9;2;1	33;21;14;9;2;1	Rab GTPase-activating protein 1	Rabgap1	>sp|A2AWA9|RBGP1_MOUSE Rab GTPase-activating protein 1 OS=Mus musculus GN=Rabgap1 PE=2 SV=1;>sp|A2AWA9-2|RBGP1_MOUSE Isoform 2 of Rab GTPase-activating protein 1 OS=Mus musculus GN=Rabgap1	6	33	33	33	18	21	26	20	18	21	26	20	18	21	26	20	35.2	35.2	35.2	120.8	1064	1064;809;455;366;148;370	28	35	40	34	137	2.1871e-240	1.1344	1.1779	34.965	119	0.50151	0.71645	19.495	23	0.49891	0.66417	25.316	30	1.3221	1.3162
A2AWI7;Q8R3V5;Q8R3V5-1;Q8R3V5-3;A2AWI9	A2AWI7;Q8R3V5;Q8R3V5-1;Q8R3V5-3;A2AWI9	4;4;4;4;4	3;3;3;3;3	3;3;3;3;3	Endophilin-B2	Sh3glb2	>tr|A2AWI7|A2AWI7_MOUSE Endophilin-B2 OS=Mus musculus GN=Sh3glb2 PE=4 SV=1;>sp|Q8R3V5|SHLB2_MOUSE Endophilin-B2 OS=Mus musculus GN=Sh3glb2 PE=2 SV=2;>sp|Q8R3V5-1|SHLB2_MOUSE Isoform 1 of Endophilin-B2 OS=Mus musculus GN=Sh3glb2;>sp|Q8R3V5-3|SHLB2_MOUSE Iso	5	4	3	3	2	1	4	3	1	1	3	2	1	1	3	2	11.6	9.7	9.7	44.907	404	404;400;395;379;374	2	5	4	3	14	6.2398e-12	0.99625	1.1001	27.251	14	0.53219	0.82936	10.088	2	0.55468	0.7521	20.638	5	1.239	1.2209
E9QLG3;A2AWL7;H7BX50;A2AWL7-3;A2AWL7-2;A2AWL7-4	E9QLG3;A2AWL7;H7BX50;A2AWL7-3;A2AWL7-2	5;5;5;4;4;1	5;5;5;4;4;1	5;5;5;4;4;1	MAX gene-associated protein	Mga	>tr|E9QLG3|E9QLG3_MOUSE MAX gene-associated protein OS=Mus musculus GN=Mga PE=4 SV=1;>sp|A2AWL7|MGAP_MOUSE MAX gene-associated protein OS=Mus musculus GN=Mga PE=2 SV=1;>tr|H7BX50|H7BX50_MOUSE MAX gene-associated protein OS=Mus musculus GN=Mga PE=4 SV=1;>sp	6	5	5	5	2	1	3	3	2	1	3	3	2	1	3	3	2.1	2.1	2.1	333.13	3042	3042;3003;2833;2924;2295;671	2	2	4	5	13	2.0901e-10	NaN	NaN	NaN	0	NaN	NaN	NaN	0	NaN	NaN	NaN	0	NaN	NaN
A2AWN8;P59326	A2AWN8;P59326	6;6	2;2	2;2	YTH domain family protein 1	Ythdf1	>tr|A2AWN8|A2AWN8_MOUSE YTH domain family 1 OS=Mus musculus GN=Ythdf1 PE=4 SV=1;>sp|P59326|YTHD1_MOUSE YTH domain family protein 1 OS=Mus musculus GN=Ythdf1 PE=2 SV=1	2	6	2	2	6	6	5	5	2	2	1	1	2	2	1	1	11.8	4.1	4.1	63.899	586	586;559	3	2	2	1	8	2.1106e-34	4.9002	5.9454	215.92	3	4.9002	5.9454	NaN	1	12.059	18.525	NaN	1	NaN	NaN
A2BDX0;Q9Z103	A2BDX0;Q9Z103	7;5	7;5	7;5	Activity-dependent neuroprotector homeobox protein	Adnp	>tr|A2BDX0|A2BDX0_MOUSE Activity-dependent neuroprotective protein OS=Mus musculus GN=Adnp PE=3 SV=1;>sp|Q9Z103|ADNP_MOUSE Activity-dependent neuroprotector homeobox protein OS=Mus musculus GN=Adnp PE=2 SV=1	2	7	7	7	3	5	4	4	3	5	4	4	3	5	4	4	8.3	8.3	8.3	124.31	1108	1108;828	16	11	27	24	78	1.7517e-63	1.2036	1.3982	97.621	2	NaN	NaN	NaN	0	0.55144	0.70109	NaN	1	2.6271	2.7883
A2BE28;A2BE28-2	A2BE28;A2BE28-2	5;5	5;5	5;5	Ribosomal biogenesis protein LAS1L	Las1l	>sp|A2BE28|LAS1L_MOUSE Ribosomal biogenesis protein LAS1L OS=Mus musculus GN=Las1l PE=1 SV=1;>sp|A2BE28-2|LAS1L_MOUSE Isoform 2 of Ribosomal biogenesis protein LAS1L OS=Mus musculus GN=Las1l	2	5	5	5	0	0	3	2	0	0	3	2	0	0	3	2	7.6	7.6	7.6	89.413	776	776;759			3	4	7	1.8908e-11	0.78624	0.77424	25.297	7	NaN	NaN	NaN	0	NaN	NaN	NaN	0	0.95663	1.0007
Q9EQU5;A2BE93;A2BE92;Q9EQU5-3	Q9EQU5;A2BE93;A2BE92;Q9EQU5-3	16;16;15;11	16;16;15;11	5;5;5;5	Protein SET	Set	>sp|Q9EQU5|SET_MOUSE Protein SET OS=Mus musculus GN=Set PE=1 SV=1;>tr|A2BE93|A2BE93_MOUSE Protein SET (Fragment) OS=Mus musculus GN=Set PE=3 SV=1;>tr|A2BE92|A2BE92_MOUSE Protein SET (Fragment) OS=Mus musculus GN=Set PE=3 SV=1;>sp|Q9EQU5-3|SET_MOUSE Isoform	4	16	16	5	13	12	12	15	13	12	12	15	5	2	4	4	46.7	46.7	17.3	33.377	289	289;215;151;146	76	49	69	74	268	0	1.3005	1.0621	84.117	146	0.27945	0.38438	34.453	40	0.32369	0.37885	22.388	29	1.8058	1.849
P70175;A2BEE9;Q52KF7;A2BEF2	P70175;A2BEE9;Q52KF7;A2BEF2	2;2;2;1	2;2;2;1	2;2;2;1	Disks large homolog 3	Dlg3	>sp|P70175|DLG3_MOUSE Disks large homolog 3 OS=Mus musculus GN=Dlg3 PE=1 SV=1;>tr|A2BEE9|A2BEE9_MOUSE Discs, large homolog 3 (Drosophila) OS=Mus musculus GN=Dlg3 PE=4 SV=1;>tr|Q52KF7|Q52KF7_MOUSE Discs, large homolog 3 (Drosophila) OS=Mus musculus GN=Dlg3	4	2	2	2	0	1	2	1	0	1	2	1	0	1	2	1	2.7	2.7	2.7	93.481	849	849;835;817;512		2	2	1	5	7.0496e-07	0.95096	0.97085	20.92	5	NaN	NaN	NaN	0	0.52806	0.70376	2.6816	2	1.0308	1.0168
A2BFB0;O08609;A2BFB1;O08609-3;A2BFB2;O08609-2;A2BFA9	A2BFB0;O08609;A2BFB1;O08609-3;A2BFB2;O08609-2;A2BFA9	3;3;2;2;2;2;2	3;3;2;2;2;2;2	3;3;2;2;2;2;2	Max-like protein X	Mlx	>tr|A2BFB0|A2BFB0_MOUSE MAX-like protein X OS=Mus musculus GN=Mlx PE=4 SV=1;>sp|O08609|MLX_MOUSE Max-like protein X OS=Mus musculus GN=Mlx PE=1 SV=1;>tr|A2BFB1|A2BFB1_MOUSE MAX-like protein X OS=Mus musculus GN=Mlx PE=4 SV=1;>sp|O08609-3|MLX_MOUSE Isoform	7	3	3	3	2	1	1	2	2	1	1	2	2	1	1	2	12.8	12.8	12.8	33.355	298	298;298;244;244;214;214;127	7	2	6	5	20	6.4144e-14	0.92529	1.1645	NaN	1	0.92529	1.1645	NaN	1	NaN	NaN	NaN	0	NaN	NaN
A2BGN7;Q9D8X0	A2BGN7;Q9D8X0	2;2	2;2	2;2	Protein MANBAL	Manbal	>tr|A2BGN7|A2BGN7_MOUSE Mannosidase beta A lysosomal-like OS=Mus musculus GN=Manbal PE=4 SV=1;>sp|Q9D8X0|MANBL_MOUSE Protein MANBAL OS=Mus musculus GN=Manbal PE=2 SV=2	2	2	2	2	0	2	0	2	0	2	0	2	0	2	0	2	40	40	40	9.3679	85	85;85		6		4	10	1.8882e-10	0.97821	1.3652	52.587	10	NaN	NaN	NaN	0	1.0909	1.5971	17.59	6	NaN	NaN
A2BH06	A2BH06	16	1	1		Rpl11	>tr|A2BH06|A2BH06_MOUSE 60S ribosomal protein L11 (Fragment) OS=Mus musculus GN=Rpl11 PE=3 SV=1	1	16	1	1	10	11	12	12	0	0	1	0	0	0	1	0	72.1	5.8	5.8	19.676	172	172			1		1	0	1.1676	1.1269	NaN	1	NaN	NaN	NaN	0	NaN	NaN	NaN	0	1.1676	1.1269
E9QAQ7;A2BH40-2;A2BH40-4;A2BH40;A2BH40-3	E9QAQ7;A2BH40-2;A2BH40-4;A2BH40;A2BH40-3	5;5;5;4;4	4;4;4;3;3	4;4;4;3;3	AT-rich interactive domain-containing protein 1A	Arid1a	>tr|E9QAQ7|E9QAQ7_MOUSE AT-rich interactive domain-containing protein 1A OS=Mus musculus GN=Arid1a PE=4 SV=1;>sp|A2BH40-2|ARI1A_MOUSE Isoform 2 of AT-rich interactive domain-containing protein 1A OS=Mus musculus GN=Arid1a;>sp|A2BH40-4|ARI1A_MOUSE Isoform 4	5	5	4	4	4	5	5	5	3	4	4	4	3	4	4	4	3.1	2.8	2.8	242.67	2287	2287;1903;1902;2283;2066	11	11	8	12	42	2.6699e-219	0.71122	0.8384	27.246	11	0.52315	0.72661	2.715	3	0.66686	0.78639	11.959	4	1.2045	1.2006
A2BIE1	A2BIE1	2	2	2		Qser1	>tr|A2BIE1|A2BIE1_MOUSE Glutamine and serine rich 1 OS=Mus musculus GN=Qser1 PE=4 SV=2	1	2	2	2	0	0	1	1	0	0	1	1	0	0	1	1	1.5	1.5	1.5	185.38	1698	1698			1	1	2	3.5402e-05	1.2852	1.1998	NaN	1	NaN	NaN	NaN	0	NaN	NaN	NaN	0	1.2852	1.1998
A2CG35;P35283	A2CG35;P35283	11;11	11;11	11;11	Ras-related protein Rab-12	Rab12	>tr|A2CG35|A2CG35_MOUSE RAB12, member RAS oncogene family OS=Mus musculus GN=Rab12 PE=3 SV=1;>sp|P35283|RAB12_MOUSE Ras-related protein Rab-12 OS=Mus musculus GN=Rab12 PE=1 SV=3	2	11	11	11	5	4	10	6	5	4	10	6	5	4	10	6	34.7	34.7	34.7	32.238	291	291;243	60	33	51	52	196	2.0059e-187	0.64314	0.55887	77.017	27	1.3619	1.9488	47.151	7	1.3465	1.9957	2.6147	3	0.57324	0.50436
A2CG63;A2CG63-2;F6R6U0	A2CG63;A2CG63-2;F6R6U0	5;5;4	5;5;4	5;5;4	AT-rich interactive domain-containing protein 4B	Arid4b	>sp|A2CG63|ARI4B_MOUSE AT-rich interactive domain-containing protein 4B OS=Mus musculus GN=Arid4b PE=2 SV=1;>sp|A2CG63-2|ARI4B_MOUSE Isoform 2 of AT-rich interactive domain-containing protein 4B OS=Mus musculus GN=Arid4b;>tr|F6R6U0|F6R6U0_MOUSE AT-rich int	3	5	5	5	4	4	2	3	4	4	2	3	4	4	2	3	3.6	3.6	3.6	147.64	1314	1314;1227;618	7	6	2	5	20	1.8027e-15	NaN	NaN	NaN	0	NaN	NaN	NaN	0	NaN	NaN	NaN	0	NaN	NaN
Q9Z148;A2CG76;Q9Z148-3;Q9Z148-2;A2CG77	Q9Z148;A2CG76;Q9Z148-3;Q9Z148-2	4;4;4;4;1	4;4;4;4;1	4;4;4;4;1	Histone-lysine N-methyltransferase EHMT2	Ehmt2	>sp|Q9Z148|EHMT2_MOUSE Histone-lysine N-methyltransferase EHMT2 OS=Mus musculus GN=Ehmt2 PE=1 SV=2;>tr|A2CG76|A2CG76_MOUSE Euchromatic histone lysine N-methyltransferase 2 OS=Mus musculus GN=Ehmt2 PE=3 SV=1;>sp|Q9Z148-3|EHMT2_MOUSE Isoform 3 of Histone-lys	5	4	4	4	2	2	3	3	2	2	3	3	2	2	3	3	4.8	4.8	4.8	138.04	1263	1263;1229;1206;1172;442	4	8	3	15	30	2.1588e-47	NaN	NaN	NaN	0	NaN	NaN	NaN	0	NaN	NaN	NaN	0	NaN	NaN
A2RSJ4	A2RSJ4	4	4	4	UHRF1-binding protein 1-like	Uhrf1bp1l	>sp|A2RSJ4|UH1BL_MOUSE UHRF1-binding protein 1-like OS=Mus musculus GN=Uhrf1bp1l PE=2 SV=2	1	4	4	4	1	0	3	2	1	0	3	2	1	0	3	2	4.2	4.2	4.2	161.94	1457	1457	2		4	2	8	9.0998e-11	1.0597	0.99291	9.3829	2	NaN	NaN	NaN	0	NaN	NaN	NaN	0	1.0677	1.061
A2RSQ0	A2RSQ0	4	3	3	DENN domain-containing protein 5B	Dennd5b	>sp|A2RSQ0|DEN5B_MOUSE DENN domain-containing protein 5B OS=Mus musculus GN=Dennd5b PE=1 SV=2	1	4	3	3	2	2	2	3	1	2	2	3	1	2	2	3	3.9	2.6	2.6	144.63	1274	1274	7	3	7	9	26	4.8175e-09	0.63319	0.63165	27.252	2	NaN	NaN	NaN	0	NaN	NaN	NaN	0	0.53076	0.52094
A2RSX9;E9Q3G5;E9QAY5	A2RSX9;E9Q3G5;E9QAY5	13;12;10	1;0;0	1;0;0		Arfip1	>tr|A2RSX9|A2RSX9_MOUSE Arfip1 protein OS=Mus musculus GN=Arfip1 PE=2 SV=1;>tr|E9Q3G5|E9Q3G5_MOUSE Protein Arfip1 OS=Mus musculus GN=Arfip1 PE=4 SV=1;>tr|E9QAY5|E9QAY5_MOUSE Protein Arfip1 OS=Mus musculus GN=Arfip1 PE=4 SV=1	3	13	1	1	7	7	11	8	0	0	1	0	0	0	1	0	56.3	4.1	4.1	38.416	341	341;366;252			1		1	0	0.17392	0.16728	NaN	1	NaN	NaN	NaN	0	NaN	NaN	NaN	0	0.17392	0.16728
A2RSY6-2;A2RSY6;A2RSY6-3	A2RSY6-2;A2RSY6	6;5;2	6;5;2	6;5;2	TRMT1-like protein	Trmt1l	>sp|A2RSY6-2|TRM1L_MOUSE Isoform 2 of TRMT1-like protein OS=Mus musculus GN=Trmt1l;>sp|A2RSY6|TRM1L_MOUSE TRMT1-like protein OS=Mus musculus GN=Trmt1l PE=2 SV=1	3	6	6	6	1	0	6	2	1	0	6	2	1	0	6	2	12.4	12.4	12.4	74.522	671	671;728;285	2		9	4	15	2.364e-78	1.0799	1.1316	16.855	14	0.92425	1.2326	0.49697	2	NaN	NaN	NaN	0	1.0799	1.0961
A2RTF1	A2RTF1	3	3	3	Cation channel sperm-associated protein subunit beta	Catsperb	>sp|A2RTF1|CTSRB_MOUSE Cation channel sperm-associated protein subunit beta OS=Mus musculus GN=Catsperb PE=1 SV=1	1	3	3	3	2	0	1	1	2	0	1	1	2	0	1	1	4.3	4.3	4.3	126.11	1109	1109	2		1	2	5	6.8254e-06	1.4995	1.462	53.943	4	0.70489	0.9367	NaN	1	NaN	NaN	NaN	0	0.96496	0.88181
A2RTH5	A2RTH5	3	3	3		Lcmt1	>tr|A2RTH5|A2RTH5_MOUSE Leucine carboxyl methyltransferase 1 OS=Mus musculus GN=Lcmt1 PE=2 SV=1	1	3	3	3	1	1	3	1	1	1	3	1	1	1	3	1	9.3	9.3	9.3	38.192	332	332	12	4	9	8	33	6.6687e-08	0.83774	0.79477	NaN	1	NaN	NaN	NaN	0	NaN	NaN	NaN	0	0.83774	0.79477
Q6PHQ9;A3KFU5;A3KFU8;D3Z5M2;Q91YZ8;G5E8X2	Q6PHQ9;A3KFU5;A3KFU8;D3Z5M2;Q91YZ8	28;28;27;27;27;2	16;16;15;15;15;1	15;15;14;14;14;0		Pabpc4;Gm10110	>tr|Q6PHQ9|Q6PHQ9_MOUSE MCG5546, isoform CRA_c OS=Mus musculus GN=Pabpc4 PE=2 SV=1;>tr|A3KFU5|A3KFU5_MOUSE Poly A binding protein, cytoplasmic 4 OS=Mus musculus GN=Pabpc4 PE=4 SV=1;>tr|A3KFU8|A3KFU8_MOUSE Poly A binding protein, cytoplasmic 4 OS=Mus muscul	6	28	16	15	24	17	19	18	13	9	10	10	12	9	9	10	40.8	25.2	23.8	72.242	660	660;631;644;615;615;370	22	14	26	26	88	0	1.4107	1.3235	35.29	88	0.51305	0.75039	10.096	22	0.51701	0.74786	13.749	14	1.5633	1.4735
Q8BLX7;A3KFV4;A3KFV7;A3KFV3;E9Q0X4	Q8BLX7;A3KFV4;A3KFV7;A3KFV3;E9Q0X4	4;4;2;2;2	4;4;2;2;2	4;4;2;2;2	Collagen alpha-1(XVI) chain	Col16a1	>sp|Q8BLX7|COGA1_MOUSE Collagen alpha-1(XVI) chain OS=Mus musculus GN=Col16a1 PE=2 SV=2;>tr|A3KFV4|A3KFV4_MOUSE Collagen alpha-1(XVI) chain OS=Mus musculus GN=Col16a1 PE=4 SV=1;>tr|A3KFV7|A3KFV7_MOUSE Collagen alpha-1(XVI) chain (Fragment) OS=Mus musculus	5	4	4	4	1	2	2	2	1	2	2	2	1	2	2	2	4.4	4.4	4.4	155.8	1580	1580;1340;1283;1058;1046	3	3	3	5	14	9.0097e-119	0.33935	0.32577	63.98	4	NaN	NaN	NaN	0	0.82154	1.1285	NaN	1	0.33935	0.32577
A3KG93;Q6ZQ88;G8JL40;F6Z4I3;F6ZC60	A3KG93;Q6ZQ88;G8JL40	17;17;17;7;3	17;17;17;7;3	17;17;17;7;3	Lysine-specific histone demethylase 1A	Kdm1a	>tr|A3KG93|A3KG93_MOUSE Amine oxidase (Flavin containing) domain 2 OS=Mus musculus GN=Kdm1a PE=4 SV=1;>sp|Q6ZQ88|KDM1A_MOUSE Lysine-specific histone demethylase 1A OS=Mus musculus GN=Kdm1a PE=1 SV=2;>tr|G8JL40|G8JL40_MOUSE Lysine-specific histone demethyla	5	17	17	17	5	1	11	8	5	1	11	8	5	1	11	8	29	29	29	94.658	873	873;853;683;322;250	5	2	16	8	31	1.3352e-126	1.7451	1.6028	45.811	31	0.46079	0.61114	16.671	5	0.40783	0.54434	9.0517	2	1.812	1.676
A3KGB4	A3KGB4	19	19	19	TBC1 domain family member 8B	Tbc1d8b	>sp|A3KGB4|TBC8B_MOUSE TBC1 domain family member 8B OS=Mus musculus GN=Tbc1d8b PE=2 SV=1	1	19	19	19	7	7	18	7	7	7	18	7	7	7	18	7	27.6	27.6	27.6	127.89	1114	1114	11	8	23	10	52	2.9886e-89	0.57626	0.57657	68.304	52	1.3808	2.0195	29.07	11	1.4072	1.862	14.607	8	0.51962	0.4993
A3KGF9	A3KGF9	4	4	4	Uncharacterized protein C15orf52 homolog		>sp|A3KGF9|CO052_MOUSE Uncharacterized protein C15orf52 homolog OS=Mus musculus PE=1 SV=1	1	4	4	4	1	2	2	2	1	2	2	2	1	2	2	2	7.9	7.9	7.9	58.688	545	545	6	5	3	6	20	1.2687e-10	1.39	1.3644	86.746	3	NaN	NaN	NaN	0	2.8313	4.0373	NaN	1	1.39	1.3644
A3KGQ6;Q9D898	A3KGQ6;Q9D898	6;6	6;6	6;6	Actin-related protein 2/3 complex subunit 5;Actin-related protein 2/3 complex subunit 5-like protein	Arpc5l	>tr|A3KGQ6|A3KGQ6_MOUSE Actin-related protein 2/3 complex subunit 5 OS=Mus musculus GN=Arpc5l PE=3 SV=1;>sp|Q9D898|ARP5L_MOUSE Actin-related protein 2/3 complex subunit 5-like protein OS=Mus musculus GN=Arpc5l PE=1 SV=1	2	6	6	6	4	5	6	3	4	5	6	3	4	5	6	3	63.4	63.4	63.4	17.109	153	153;153	10	9	14	9	42	3.1055e-69	0.95	0.98577	12.725	42	0.71194	1.0602	11.664	10	0.7446	1.0381	20.875	9	1.0194	0.96023
Q9D8V0-4;A3KGR9;Q6PGJ8;Q9D8V0-2	Q9D8V0-4;A3KGR9	5;5;2;1	1;1;0;0	1;1;0;0		H13	>sp|Q9D8V0-4|HM13_MOUSE Isoform 4 of Minor histocompatibility antigen H13 OS=Mus musculus GN=Hm13;>tr|A3KGR9|A3KGR9_MOUSE Histocompatibility 13 (Fragment) OS=Mus musculus GN=H13 PE=4 SV=1	4	5	1	1	4	2	5	3	0	0	1	0	0	0	1	0	19.3	5.3	5.3	43.363	394	394;347;224;173			1		1	9.1214e-43	NaN	NaN	NaN	0	NaN	NaN	NaN	0	NaN	NaN	NaN	0	NaN	NaN
A3KGU7	A3KGU7	201	1	0		Spna2	>tr|A3KGU7|A3KGU7_MOUSE Protein Spna2 OS=Mus musculus GN=Spna2 PE=4 SV=1	1	201	1	0	148	159	163	164	0	1	1	1	0	0	0	0	76.2	0.8	0	285.15	2477	2477		2	1	3	6	0	0.83332	1.0153	24.95	6	NaN	NaN	NaN	0	0.86085	1.1545	2.4162	2	0.67737	0.79132
9;1491463;1491464;1491465;1491466;1491467;1491468;1491469;1491470;1491471;1491472;1491473;1491474;1491475;1491476;1491477;1491478;1491479;1491480;1491481;1491482;1491483;1491484;1491485;1491486;1491487;1491488;1491489;1491490;1491491;1491492;1491493;1491494;1491495;1491496;1491497;1491498;1491499;1491500;1491501;1491502;1491503;1491504;1491505;1491506;1491507;1491508;1491509;1491510;1491511;14915…	37823;37839;71021;82488;87533;91165;91189;98420;107091;107101;135262;142925;219444;222231;222850;231937;264288;264298;264315;265409;265430;269366;271957;272141;275860;275872;277079;277177;277339;281471;299418;303541;311179;315712;315732;316253;321032;329005;331142;332843;333577;335034;335367;338858;338859;347810;348177;370641;370668;370711;370713;371575;371584;382640;385858;390572;392298;394423;3…	216;217;218;219;220;221;222;223;224;225;226;227;228;229;230;231;232;233;234;235;236;237;238;239;240;241;242;243;244;245;246	384;385;386;387;388;6869	109;278;380;467;483;541;653;773;850;906;936;963;1163;1179;1198;1352;1439;1440;1461;1617;1730;1778;1895;2177;2277;2307;2309;2335;2336;2366;2450	1029;1031;1217;1322;1323;1550
E9Q921;A3KMF4;O88573;B1AVP1	E9Q921;A3KMF4;O88573;B1AVP1	5;5;4;4	5;5;4;4	5;5;4;4	AF4/FMR2 family member 1	Aff1	>tr|E9Q921|E9Q921_MOUSE AF4/FMR2 family member 1 OS=Mus musculus GN=Aff1 PE=4 SV=1;>tr|A3KMF4|A3KMF4_MOUSE AF4/FMR2 family member 1 OS=Mus musculus GN=Aff1 PE=2 SV=1;>sp|O88573|AFF1_MOUSE AF4/FMR2 family member 1 OS=Mus musculus GN=Aff1 PE=2 SV=2;>tr|B1AVP	4	5	5	5	3	3	3	4	3	3	3	4	3	3	3	4	4.6	4.6	4.6	132.55	1226	1226;1218;1216;871	9	10	12	10	41	3.6815e-33	NaN	NaN	NaN	0	NaN	NaN	NaN	0	NaN	NaN	NaN	0	NaN	NaN
Q8K0T0;A3QM89;Q7M6W1	Q8K0T0;A3QM89;Q7M6W1	2;2;2	2;2;2	2;2;2	Reticulon-1	Rtn1	>sp|Q8K0T0|RTN1_MOUSE Reticulon-1 OS=Mus musculus GN=Rtn1 PE=1 SV=1;>tr|A3QM89|A3QM89_MOUSE Reticulon 1 (Fragment) OS=Mus musculus GN=Rtn1 PE=4 SV=1;>tr|Q7M6W1|Q7M6W1_MOUSE RTN1-C OS=Mus musculus GN=Rtn1 PE=2 SV=1	3	2	2	2	2	1	2	1	2	1	2	1	2	1	2	1	2.1	2.1	2.1	83.571	780	780;253;208	7	4	7	4	22	5.7836e-07	0.98945	1.0644	24.684	22	0.98131	1.5322	22.537	7	0.97109	1.4839	3.2653	4	1.0183	0.94151
A5D6P2;G3XA13;Q99NH2;B7ZNY3;F6S7Z1;E0CXL4;E0CZE2;E0CY24;E0CZ83;Q99NH2-2;Q99NH2-4;E0CXR8;F6TSJ9;E0CX45;F6UGU7;Q99NH2-3;E9PYJ2;Q99NH2-5;Q4JJC0;F6URI7;F6TB42;F6T4Y3	A5D6P2;G3XA13;Q99NH2;B7ZNY3;F6S7Z1;E0CXL4;E0CZE2;E0CY24;E0CZ83;Q99NH2-2;Q99NH2-4;E0CXR8;F6TSJ9;E0CX45;F6UGU7;Q99NH2-3;E9PYJ2;Q99NH2-5	9;8;8;8;7;7;7;6;6;6;6;5;5;5;5;5;5;5;2;2;1;1	9;8;8;8;7;7;7;6;6;6;6;5;5;5;5;5;5;5;2;2;1;1	9;8;8;8;7;7;7;6;6;6;6;5;5;5;5;5;5;5;2;2;1;1	Partitioning defective 3 homolog	Pard3	>tr|A5D6P2|A5D6P2_MOUSE Par-3 (Partitioning defective 3) homolog (C. elegans) OS=Mus musculus GN=Pard3 PE=2 SV=1;>tr|G3XA13|G3XA13_MOUSE Par-3 (Partitioning defective 3) homolog (C. elegans) OS=Mus musculus GN=Pard3 PE=4 SV=1;>sp|Q99NH2|PARD3_MOUSE Partiti	22	9	9	9	5	6	4	9	5	6	4	9	5	6	4	9	7.6	7.6	7.6	149.08	1334	1334;1333;1333;1319;1324;1289;1024;1247;1095;1029;895;990;984;943;919;744;741;606;422;269;116;102	16	26	18	31	91	5.2372e-35	NaN	NaN	NaN	0	NaN	NaN	NaN	0	NaN	NaN	NaN	0	NaN	NaN
A5D6P6;Q9D030	A5D6P6;Q9D030	2;2	2;2	2;2	Twist-related protein 2	Twist2	>tr|A5D6P6|A5D6P6_MOUSE Twist homolog 2 (Drosophila) OS=Mus musculus GN=Twist2 PE=2 SV=1;>sp|Q9D030|TWST2_MOUSE Twist-related protein 2 OS=Mus musculus GN=Twist2 PE=1 SV=1	2	2	2	2	1	1	1	2	1	1	1	2	1	1	1	2	10	10	10	18.124	160	160;160	10	1	2	4	17	2.2839e-46	NaN	NaN	NaN	0	NaN	NaN	NaN	0	NaN	NaN	NaN	0	NaN	NaN
A6H5X4;A6H5X4-3;A6H5X4-2;B4XVP9	A6H5X4;A6H5X4-3;A6H5X4-2	3;3;2;1	3;3;2;1	3;3;2;1	PHD finger protein 11	Phf11	>sp|A6H5X4|PH11L_MOUSE PHD finger protein 11-like OS=Mus musculus GN=Phf11l PE=2 SV=1;>sp|A6H5X4-3|PH11L_MOUSE Isoform 3 of PHD finger protein 11-like OS=Mus musculus GN=Phf11l;>sp|A6H5X4-2|PH11L_MOUSE Isoform 2 of PHD finger protein 11-like OS=Mus musculu	4	3	3	3	2	2	2	2	2	2	2	2	2	2	2	2	10.1	10.1	10.1	37.728	337	337;320;269;339	6	8	4	6	24	1.9215e-11	2.5889	2.749	5.5627	2	NaN	NaN	NaN	0	NaN	NaN	NaN	0	2.5889	2.749
A6H5Z3;A6H5Z3-2	A6H5Z3;A6H5Z3-2	8;6	8;6	8;6	Exocyst complex component 6B	Exoc6b	>sp|A6H5Z3|EXC6B_MOUSE Exocyst complex component 6B OS=Mus musculus GN=Exoc6b PE=2 SV=1;>sp|A6H5Z3-2|EXC6B_MOUSE Isoform 2 of Exocyst complex component 6B OS=Mus musculus GN=Exoc6b	2	8	8	8	2	2	5	5	2	2	5	5	2	2	5	5	15.6	15.6	15.6	94.128	810	810;678	3	2	7	8	20	1.4093e-30	0.8253	0.80218	24.629	19	1.0543	1.386	5.2738	3	1.0563	1.3395	NaN	1	0.73834	0.75056
A6H6A5;Q00175;E9QPW3	A6H6A5;Q00175;E9QPW3	5;5;4	5;5;4	5;5;4	Progesterone receptor	Pgr	>tr|A6H6A5|A6H6A5_MOUSE Progesterone receptor OS=Mus musculus GN=Pgr PE=2 SV=1;>sp|Q00175|PRGR_MOUSE Progesterone receptor OS=Mus musculus GN=Pgr PE=1 SV=1;>tr|E9QPW3|E9QPW3_MOUSE Progesterone receptor OS=Mus musculus GN=Pgr PE=3 SV=1	3	5	5	5	2	4	2	3	2	4	2	3	2	4	2	3	10	10	10	98.98	926	926;923;761	6	9	5	11	31	7.7186e-38	0.2683	0.25777	112.34	10	2.3576	3.0185	90.048	2	0.95093	1.2006	NaN	1	0.22764	0.23262
A6H6A9;A6H6A9-2	A6H6A9;A6H6A9-2	2;2	2;2	2;2	Rab GTPase-activating protein 1-like	Rabgap1l	>sp|A6H6A9|RBG1L_MOUSE Rab GTPase-activating protein 1-like OS=Mus musculus GN=Rabgap1l PE=1 SV=1;>sp|A6H6A9-2|RBG1L_MOUSE Isoform 2 of Rab GTPase-activating protein 1-like OS=Mus musculus GN=Rabgap1l	2	2	2	2	1	1	2	1	1	1	2	1	1	1	2	1	3.1	3.1	3.1	92.403	815	815;477	7	11	7	8	33	3.0727e-17	NaN	NaN	NaN	0	NaN	NaN	NaN	0	NaN	NaN	NaN	0	NaN	NaN
A6H6E9;F6SJC5;E9Q190	A6H6E9;F6SJC5	3;2;1	3;2;1	3;2;1	Tetratricopeptide repeat protein 23-like	Ttc23l	>sp|A6H6E9|TT23L_MOUSE Tetratricopeptide repeat protein 23-like OS=Mus musculus GN=Ttc23l PE=2 SV=1;>tr|F6SJC5|F6SJC5_MOUSE Tetratricopeptide repeat protein 23-like (Fragment) OS=Mus musculus GN=Ttc23l PE=4 SV=1	3	3	3	3	1	2	2	1	1	2	2	1	1	2	2	1	6.6	6.6	6.6	51.532	458	458;179;209	4	3	5	2	14	4.2271e-08	0.81436	0.83485	113.09	14	2.2374	3.0242	88.356	4	1.0666	1.2892	139.87	3	0.49772	0.50885
A6H6S0;G5E876	A6H6S0;G5E876	1;1	1;1	1;1		Herc3	>tr|A6H6S0|A6H6S0_MOUSE Hect domain and RLD 3 OS=Mus musculus GN=Herc3 PE=2 SV=1;>tr|G5E876|G5E876_MOUSE Hect domain and RLD 3, isoform CRA_a OS=Mus musculus GN=Herc3 PE=4 SV=1	2	1	1	1	0	1	0	1	0	1	0	1	0	1	0	1	1.4	1.4	1.4	117.35	1050	1050;913		3		4	7	0.0027618	NaN	NaN	NaN	0	NaN	NaN	NaN	0	NaN	NaN	NaN	0	NaN	NaN
A6H8H2-2;A6H8H2;E9Q449;F6WXD7	A6H8H2-2;A6H8H2;E9Q449	10;10;9;2	10;10;9;2	10;10;9;2		Dennd4c	>sp|A6H8H2-2|DEN4C_MOUSE Isoform 2 of DENN domain-containing protein 4C OS=Mus musculus GN=Dennd4c;>sp|A6H8H2|DEN4C_MOUSE DENN domain-containing protein 4C OS=Mus musculus GN=Dennd4c PE=1 SV=1;>tr|E9Q449|E9Q449_MOUSE DENN domain-containing protein 4C OS=Mu	4	10	10	10	7	8	6	7	7	8	6	7	7	8	6	7	7.2	7.2	7.2	216.45	1955	1955;1906;1615;244	48	52	34	60	194	1.4536e-118	NaN	NaN	NaN	0	NaN	NaN	NaN	0	NaN	NaN	NaN	0	NaN	NaN
J3QQ59;K7N713;E9Q5P1;E9PUT9;E9PVJ0;E9PW72;E9QAJ8;K7N6W8;E9Q501;E9Q7N2;A6NAS4;A6NAS7;E9PUV8;E9PW80;E9Q257;E9Q7M8;K7N6Y2;K7N707;K7N708;K7N757;Q5FWC9;E9Q3J8;F7B1L1;J3QK73;K7N751;E9Q324;K7N6X2;A6NAS8;A6NAS9;K7N6U6;K7N6U2;K7N6V4;K7N6X1;E9Q369;K7N738;J3QM74;J3QNK3;J3KMQ9;K7N6Y4;K7N721;A6NAT8;E9Q9Z8;K7N6T7;E9Q058;K7N6Y8;A6NAT4;E9PZI7;E9PZQ5;Q8C7R2;Q9D073;E9Q7N1;J3QMF6;J3QN62;J3QNM4;K7N6W6;E9Q6N2;E9Q032;…	J3QQ59;K7N713;E9Q5P1;E9PUT9;E9PVJ0;E9PW72;E9QAJ8;K7N6W8;E9Q501;E9Q7N2;A6NAS4;A6NAS7;E9PUV8;E9PW80;E9Q257;E9Q7M8;K7N6Y2;K7N707;K7N708;K7N757;Q5FWC9;E9Q3J8;F7B1L1;J3QK73;K7N751;E9Q324;K7N6X2;A6NAS8;A6NAS9;K7N6U6;K7N6U2;K7N6V4;K7N6X1;E9Q369;K7N738;J3QM74;J3QNK3;J3KMQ9;K7N6Y4;K7N721;A6NAT8;E9Q9Z8;K7N6T7;E9Q058;K7N6Y8;A6NAT4;E9PZI7;E9PZQ5;Q8C7R2;Q9D073;E9Q7N1;J3QMF6;J3QN62;J3QNM4;K7N6W6;E9Q6N2;E9Q032;…	2;2;2;2;2;2;2;2;2;2;2;2;2;2;2;2;2;2;2;2;2;2;2;2;2;2;2;2;2;2;1;1;1;1;1;1;1;1;1;1;1;1;1;1;1;1;1;1;1;1;1;1;1;1;1;1;1;1;1;1	1;1;1;1;1;1;1;1;1;1;1;1;1;1;1;1;1;1;1;1;1;1;1;1;1;1;1;1;1;1;0;0;1;0;1;1;1;0;0;0;0;0;0;1;0;0;0;0;0;0;0;0;0;0;0;0;0;0;0;0	1;1;1;1;1;1;1;1;1;1;1;1;1;1;1;1;1;1;1;1;1;1;1;1;1;1;1;1;1;1;0;0;1;0;1;1;1;0;0;0;0;0;0;1;0;0;0;0;0;0;0;0;0;0;0;0;0;0;0;0		Gm3636;Gm3252;Gm3468;Gm3173;Gm10406;Gm10128;Gm8237;Gm5796;Gm3558;Gm3483;Gm8281;Gm3164;Gm3095;Gm3752;Gm2897;2610042L04Rik;Gm3358;Gm3512;Gm8206	>tr|J3QQ59|J3QQ59_MOUSE Protein Gm3383 OS=Mus musculus GN=LOC100861615 PE=4 SV=1;>tr|K7N713|K7N713_MOUSE Protein Gm3264 OS=Mus musculus GN=Gm3264 PE=4 SV=1;>tr|E9Q5P1|E9Q5P1_MOUSE Protein Gm3636 OS=Mus musculus GN=Gm3636 PE=4 SV=1;>tr|E9PUT9|E9PUT9_MOUSE P	60	2	1	1	1	1	1	1	0	1	0	1	0	1	0	1	9.3	4.2	4.2	30.858	259	259;238;227;216;216;216;216;216;211;207;205;205;205;205;205;205;205;205;205;205;205;204;203;203;203;197;186;171;171;171;270;267;263;238;227;205;205;205;188;186;172;172;172;166;158;150;150;150;150;150;148;148;148;148;148;146;133;133;131;131		2		1	3	1.2154e-07	0.73731	0.98845	5.4253	3	NaN	NaN	NaN	0	0.71972	1.0223	4.7597	2	NaN	NaN
A6P3E4;Q91Y86;G3X8U9;Q7TSJ7;D3Z1Z4	A6P3E4;Q91Y86;G3X8U9;Q7TSJ7;D3Z1Z4	3;3;2;2;2	3;3;2;2;2	3;3;2;2;2	Mitogen-activated protein kinase 8	Mapk8	>tr|A6P3E4|A6P3E4_MOUSE JNK1 beta1 protein kinase OS=Mus musculus GN=Mapk8 PE=2 SV=1;>sp|Q91Y86|MK08_MOUSE Mitogen-activated protein kinase 8 OS=Mus musculus GN=Mapk8 PE=1 SV=1;>tr|G3X8U9|G3X8U9_MOUSE Mitogen activated protein kinase 8, isoform CRA_b OS=Mu	5	3	3	3	2	0	2	1	2	0	2	1	2	0	2	1	8.3	8.3	8.3	44.021	384	384;384;427;427;308	2		4	1	7	5.7689e-09	0.87676	0.93966	32.804	2	0.66463	0.74513	NaN	1	NaN	NaN	NaN	0	1.1566	1.185
Q80U16;A6PW28;Q80U16-2;Q80U16-5;Q80U16-6;Q80U16-7;Q80U16-3;Q80U16-4	Q80U16;A6PW28;Q80U16-2;Q80U16-5;Q80U16-6;Q80U16-7;Q80U16-3;Q80U16-4	4;4;4;4;4;4;3;3	4;4;4;4;4;4;3;3	4;4;4;4;4;4;3;3	Protein FAM65B	Fam65b	>sp|Q80U16|FA65B_MOUSE Protein FAM65B OS=Mus musculus GN=Fam65b PE=1 SV=2;>tr|A6PW28|A6PW28_MOUSE Likely orthologue of H. sapiens chromosome 6 open reading frame 32 (C6orf32) OS=Mus musculus GN=RP23-461O24.1 PE=4 SV=1;>sp|Q80U16-2|FA65B_MOUSE Isoform 2 of	8	4	4	4	3	1	2	3	3	1	2	3	3	1	2	3	4	4	4	118.97	1078	1078;1053;672;633;629;605;389;388	13	1	13	5	32	8.3413e-22	0.38909	0.6203	18.711	3	0.37856	0.58593	8.0605	2	NaN	NaN	NaN	0	NaN	NaN
A6PW47;Q99K74;Q99K74-2;Q99K74-3;A6PW46	A6PW47;Q99K74;Q99K74-2;Q99K74-3	7;7;7;6;1	7;7;7;6;1	7;7;7;6;1	Mediator of RNA polymerase II transcription subunit 24	Med24	>tr|A6PW47|A6PW47_MOUSE Mediator complex subunit 24 OS=Mus musculus GN=Med24 PE=4 SV=1;>sp|Q99K74|MED24_MOUSE Mediator of RNA polymerase II transcription subunit 24 OS=Mus musculus GN=Med24 PE=1 SV=1;>sp|Q99K74-2|MED24_MOUSE Isoform 2 of Mediator of RNA po	5	7	7	7	3	1	6	3	3	1	6	3	3	1	6	3	10.9	10.9	10.9	111.86	1006	1006;987;956;758;90	4	1	8	6	19	4.4923e-78	1.0543	1.0833	17.413	11	0.62743	0.84329	5.7425	3	NaN	NaN	NaN	0	1.2059	1.2073
A6PW84;Q3V1T4;A2A7Q5;Q3V1T4-3;Q3V1T4-2;F2Z499	A6PW84;Q3V1T4;A2A7Q5;Q3V1T4-3;Q3V1T4-2	25;25;24;20;14;9	25;25;24;20;14;9	24;24;23;19;14;9	Prolyl 3-hydroxylase 1	Lepre1	>tr|A6PW84|A6PW84_MOUSE Leprecan 1 OS=Mus musculus GN=Lepre1 PE=4 SV=1;>sp|Q3V1T4|P3H1_MOUSE Prolyl 3-hydroxylase 1 OS=Mus musculus GN=Lepre1 PE=2 SV=2;>tr|A2A7Q5|A2A7Q5_MOUSE Leprecan 1 OS=Mus musculus GN=Lepre1 PE=4 SV=1;>sp|Q3V1T4-3|P3H1_MOUSE Isoform 3	6	25	25	24	21	8	20	15	21	8	20	15	21	8	19	14	42.5	42.5	41.4	84.472	746	746;739;748;560;543;363	36	14	40	29	119	0	0.60442	0.59508	85.238	113	2.0413	2.8771	17.122	34	2.3233	3.0562	18.447	12	0.49809	0.49902
A6PWE0	A6PWE0	2	1	1		Gm15698	>tr|A6PWE0|A6PWE0_MOUSE Novel protein OS=Mus musculus GN=Gm15698 PE=4 SV=1	1	2	1	1	1	1	2	1	0	0	1	0	0	0	1	0	6.2	5.6	5.6	18.413	161	161			1		1	4.3772e-05	NaN	NaN	NaN	0	NaN	NaN	NaN	0	NaN	NaN	NaN	0	NaN	NaN
E9Q284;Q5SU73;A6PWE1	E9Q284;Q5SU73;A6PWE1	4;4;4	4;4;4	4;4;4	Coilin	Coil	>tr|E9Q284|E9Q284_MOUSE Coilin OS=Mus musculus GN=Coil PE=4 SV=1;>sp|Q5SU73|COIL_MOUSE Coilin OS=Mus musculus GN=Coil PE=2 SV=1;>tr|A6PWE1|A6PWE1_MOUSE Coilin (Fragment) OS=Mus musculus GN=Coil PE=4 SV=1	3	4	4	4	2	3	3	1	2	3	3	1	2	3	3	1	11.2	11.2	11.2	62.262	573	573;570;547	3	6	5	3	17	1.0517e-18	NaN	NaN	NaN	0	NaN	NaN	NaN	0	NaN	NaN	NaN	0	NaN	NaN
Q9CWU6;A6PWX9;F6V305;A6PWX7;A6PWX8;Q9CWU6-2;D6RJ83	Q9CWU6;A6PWX9;F6V305;A6PWX7;A6PWX8	5;5;4;4;3;2;1	5;5;4;4;3;2;1	2;2;2;2;0;0;0	Ubiquinol-cytochrome c reductase complex chaperone CBP3 homolog	Uqcc	>sp|Q9CWU6|UQCC_MOUSE Ubiquinol-cytochrome c reductase complex chaperone CBP3 homolog OS=Mus musculus GN=Uqcc PE=2 SV=1;>tr|A6PWX9|A6PWX9_MOUSE Ubiquinol-cytochrome c reductase complex chaperone CBP3 homolog OS=Mus musculus GN=Uqcc PE=4 SV=1;>tr|F6V305|F6V	7	5	5	2	2	0	5	2	2	0	5	2	1	0	2	1	19.3	19.3	5.8	34.299	295	295;269;243;227;262;158;120	3		10	3	16	5.0393e-17	1.1457	1.1282	14.59	16	0.74489	1.108	17.984	3	NaN	NaN	NaN	0	1.1697	1.1282
A6X8Z5;Q640N3;E9QMX7;Q640N3-2	A6X8Z5	17;1;1;1	17;1;1;1	17;1;1;1	Rho GTPase-activating protein 31	Arhgap31	>sp|A6X8Z5|RHG31_MOUSE Rho GTPase-activating protein 31 OS=Mus musculus GN=Arhgap31 PE=1 SV=1	4	17	17	17	9	12	9	8	9	12	9	8	9	12	9	8	12.8	12.8	12.8	155.27	1425	1425;1101;1093;1093	78	50	40	49	217	8.7999e-146	1.1901	1.6161	58.901	10	2.582	3.2874	18.577	2	0.84036	1.1074	48.481	4	1.7254	1.6378
A6X919	A6X919	1	1	1	Protein dpy-19 homolog 1	Dpy19l1	>sp|A6X919|D19L1_MOUSE Protein dpy-19 homolog 1 OS=Mus musculus GN=Dpy19l1 PE=2 SV=1	1	1	1	1	1	1	1	1	1	1	1	1	1	1	1	1	2.8	2.8	2.8	84.186	746	746	2	1	2	1	6	4.9954e-56	NaN	NaN	NaN	0	NaN	NaN	NaN	0	NaN	NaN	NaN	0	NaN	NaN
A6ZI47	A6ZI47	16	1	1	Fructose-bisphosphate aldolase	Aldoart2	>tr|A6ZI47|A6ZI47_MOUSE Fructose-bisphosphate aldolase OS=Mus musculus GN=Aldoart2 PE=2 SV=1	1	16	1	1	13	12	14	14	1	0	0	0	1	0	0	0	29.1	2.2	2.2	39.37	364	364	1				1	0	1.3848	1.3535	NaN	1	1.3848	1.3535	NaN	1	NaN	NaN	NaN	0	NaN	NaN
A8C756;A8C756-2;A8C756-3;A8C756-5;A8C756-4	A8C756	29;9;6;3;3	29;9;6;3;3	29;9;6;3;3	Thyroid adenoma-associated protein homolog	Thada	>sp|A8C756|THADA_MOUSE Thyroid adenoma-associated protein homolog OS=Mus musculus GN=Thada PE=2 SV=1	5	29	29	29	17	9	26	6	17	9	26	6	17	9	26	6	20.4	20.4	20.4	217.29	1938	1938;668;500;362;347	29	15	48	21	113	2.1843e-111	1.5088	1.4526	64.095	79	0.37122	0.49674	18.983	24	0.44978	0.53637	29.373	10	1.764	1.7288
P70271;Q5SWV3;A8Y5C3	P70271;Q5SWV3;A8Y5C3	2;2;2	2;2;2	2;2;2	PDZ and LIM domain protein 4	Pdlim4	>sp|P70271|PDLI4_MOUSE PDZ and LIM domain protein 4 OS=Mus musculus GN=Pdlim4 PE=1 SV=3;>tr|Q5SWV3|Q5SWV3_MOUSE PDZ and LIM domain 4 OS=Mus musculus GN=Pdlim4 PE=2 SV=1;>tr|A8Y5C3|A8Y5C3_MOUSE PDZ and LIM domain 4 (Fragment) OS=Mus musculus GN=Pdlim4 PE=4	3	2	2	2	2	1	2	2	2	1	2	2	2	1	2	2	8.8	8.8	8.8	35.556	330	330;246;121	14	6	11	7	38	7.7842e-42	NaN	NaN	NaN	0	NaN	NaN	NaN	0	NaN	NaN	NaN	0	NaN	NaN
Q9EST3;Q9EST3-2;A8Y5K6;Q5NBZ7	Q9EST3;Q9EST3-2;A8Y5K6	4;4;4;1	4;4;4;1	4;4;4;1	Eukaryotic translation initiation factor 4E transporter	Eif4enif1	>sp|Q9EST3|4ET_MOUSE Eukaryotic translation initiation factor 4E transporter OS=Mus musculus GN=Eif4enif1 PE=1 SV=2;>sp|Q9EST3-2|4ET_MOUSE Isoform 2 of Eukaryotic translation initiation factor 4E transporter OS=Mus musculus GN=Eif4enif1;>tr|A8Y5K6|A8Y5K6_M	4	4	4	4	4	4	4	4	4	4	4	4	4	4	4	4	3.9	3.9	3.9	107.98	983	983;959;808;194	57	48	41	34	180	1.3253e-17	NaN	NaN	NaN	0	NaN	NaN	NaN	0	NaN	NaN	NaN	0	NaN	NaN
Q8BSN5;B0QZH9	Q8BSN5;B0QZH9	1;1	1;1	1;1	PHD finger protein 23	Phf23	>sp|Q8BSN5|PHF23_MOUSE PHD finger protein 23 OS=Mus musculus GN=Phf23 PE=2 SV=2;>tr|B0QZH9|B0QZH9_MOUSE PHD finger protein 23 (Fragment) OS=Mus musculus GN=Phf23 PE=4 SV=1	2	1	1	1	0	1	1	1	0	1	1	1	0	1	1	1	3.7	3.7	3.7	43.546	401	401;193		2	2	2	6	0.00030126	NaN	NaN	NaN	0	NaN	NaN	NaN	0	NaN	NaN	NaN	0	NaN	NaN
Q5F293;B0QZJ2	Q5F293;B0QZJ2	2;2	2;2	2;2		Zbtb4	>tr|Q5F293|Q5F293_MOUSE Protein Zbtb4 OS=Mus musculus GN=Zbtb4 PE=2 SV=1;>tr|B0QZJ2|B0QZJ2_MOUSE Protein Zbtb4 (Fragment) OS=Mus musculus GN=Zbtb4 PE=4 SV=1	2	2	2	2	1	1	1	1	1	1	1	1	1	1	1	1	2.4	2.4	2.4	102.66	982	982;136	2	1	2	2	7	7.6056e-33	0.4189	0.61313	5.1927	2	0.4189	0.61313	5.1927	2	NaN	NaN	NaN	0	NaN	NaN
B0QZN5;P63044	B0QZN5;P63044	5;5	2;2	2;2	Vesicle-associated membrane protein 2	Vamp2	>tr|B0QZN5|B0QZN5_MOUSE Vesicle-associated membrane 2 OS=Mus musculus GN=Vamp2 PE=4 SV=1;>sp|P63044|VAMP2_MOUSE Vesicle-associated membrane protein 2 OS=Mus musculus GN=Vamp2 PE=1 SV=2	2	5	2	2	2	3	4	4	0	0	1	1	0	0	1	1	42.3	27.6	27.6	17.862	163	163;116			4	1	5	4.9837e-301	0.69518	0.65409	18.397	5	NaN	NaN	NaN	0	NaN	NaN	NaN	0	0.71568	0.67625
O55101;B0QZP8;H3BIZ8;H3BKF4;H3BJ78;H3BJY1	O55101;B0QZP8;H3BIZ8;H3BKF4;H3BJ78;H3BJY1	1;1;1;1;1;1	1;1;1;1;1;1	1;1;1;1;1;1	Synaptogyrin-2	Syngr2	>sp|O55101|SNG2_MOUSE Synaptogyrin-2 OS=Mus musculus GN=Syngr2 PE=2 SV=1;>tr|B0QZP8|B0QZP8_MOUSE Synaptogyrin 2 OS=Mus musculus GN=Syngr2 PE=4 SV=1;>tr|H3BIZ8|H3BIZ8_MOUSE Synaptogyrin 2, isoform CRA_b OS=Mus musculus GN=Syngr2 PE=4 SV=1;>tr|H3BKF4|H3BKF4_	6	1	1	1	1	1	1	1	1	1	1	1	1	1	1	1	4.5	4.5	4.5	24.778	224	224;194;177;155;147;46	2	2	1	4	9	0.00010042	0.69261	0.65546	55.853	9	1.19	1.79	9.1285	2	1.1008	1.6345	5.4585	2	0.59156	0.56158
Q5SS80;B0QZT2;Q5SS80-2	Q5SS80;B0QZT2;Q5SS80-2	2;2;2	2;2;2	2;2;2	Dehydrogenase/reductase SDR family member 13	Dhrs13	>sp|Q5SS80|DHR13_MOUSE Dehydrogenase/reductase SDR family member 13 OS=Mus musculus GN=Dhrs13 PE=1 SV=1;>tr|B0QZT2|B0QZT2_MOUSE Dehydrogenase/reductase (SDR family) member 13 OS=Mus musculus GN=Dhrs13 PE=4 SV=1;>sp|Q5SS80-2|DHR13_MOUSE Isoform 2 of Dehydro	3	2	2	2	2	0	2	1	2	0	2	1	2	0	2	1	8.2	8.2	8.2	40.744	376	376;326;285	3		4	3	10	2.571e-12	0.81537	0.89407	15.746	10	0.79166	0.90655	15.741	3	NaN	NaN	NaN	0	0.80575	0.84471
Q9CQJ7;Q9CQJ7-2;B0QZU1	Q9CQJ7;Q9CQJ7-2;B0QZU1	1;1;1	1;1;1	1;1;1	Securin	Pttg1	>sp|Q9CQJ7|PTTG1_MOUSE Securin OS=Mus musculus GN=Pttg1 PE=1 SV=1;>sp|Q9CQJ7-2|PTTG1_MOUSE Isoform 2 of Securin OS=Mus musculus GN=Pttg1;>tr|B0QZU1|B0QZU1_MOUSE Pituitary tumor-transforming 1 (Fragment) OS=Mus musculus GN=Pttg1 PE=4 SV=1	3	1	1	1	1	1	1	1	1	1	1	1	1	1	1	1	5.5	5.5	5.5	21.725	199	199;188;99	14	13	11	14	52	1.9675e-07	NaN	NaN	NaN	0	NaN	NaN	NaN	0	NaN	NaN	NaN	0	NaN	NaN
B0V2M3;Q99PP2;B8JJA0;Q99PP2-2	B0V2M3;Q99PP2;B8JJA0	7;4;4;1	7;4;4;1	7;4;4;1	Zinc finger protein 318	Zfp318;Znf318	>tr|B0V2M3|B0V2M3_MOUSE Protein Zfp318 OS=Mus musculus GN=Zfp318 PE=4 SV=1;>sp|Q99PP2|ZN318_MOUSE Zinc finger protein 318 (Fragment) OS=Mus musculus GN=Znf318 PE=1 SV=2;>tr|B8JJA0|B8JJA0_MOUSE Protein Zfp318 OS=Mus musculus GN=Zfp318 PE=4 SV=1	4	7	7	7	1	1	0	6	1	1	0	6	1	1	0	6	3.8	3.8	3.8	246.32	2237	2237;2064;1154;981	1	4		13	18	3.3276e-15	0.26171	0.35847	NaN	1	0.26171	0.35847	NaN	1	NaN	NaN	NaN	0	NaN	NaN
Q91VY5;B0V2M9;Q91VY5-2;B0V2M7	Q91VY5;B0V2M9;Q91VY5-2;B0V2M7	2;2;2;1	2;2;2;1	2;2;2;1	Lysine-specific demethylase 4B	Kdm4b	>sp|Q91VY5|KDM4B_MOUSE Lysine-specific demethylase 4B OS=Mus musculus GN=Kdm4b PE=1 SV=1;>tr|B0V2M9|B0V2M9_MOUSE Jumonji domain containing 2B OS=Mus musculus GN=Kdm4b PE=4 SV=1;>sp|Q91VY5-2|KDM4B_MOUSE Isoform 2 of Lysine-specific demethylase 4B OS=Mus mus	4	2	2	2	1	2	1	1	1	2	1	1	1	2	1	1	2.8	2.8	2.8	121.6	1086	1086;1021;1021;208	2	3	2	3	10	2.4155e-11	NaN	NaN	NaN	0	NaN	NaN	NaN	0	NaN	NaN	NaN	0	NaN	NaN
Q3UH70;B0V2V7;Q9ESU6;B0V2V8;Q9ESU6-2;B0V2V6;D6RGP2	Q3UH70;B0V2V7;Q9ESU6	8;8;8;3;3;2;1	8;8;8;3;3;2;1	7;7;7;2;2;2;1	Bromodomain-containing protein 4	Brd4	>tr|Q3UH70|Q3UH70_MOUSE Bromodomain-containing protein 4 OS=Mus musculus GN=Brd4 PE=2 SV=1;>tr|B0V2V7|B0V2V7_MOUSE Bromodomain containing 4 OS=Mus musculus GN=Brd4 PE=4 SV=1;>sp|Q9ESU6|BRD4_MOUSE Bromodomain-containing protein 4 OS=Mus musculus GN=Brd4 PE=	7	8	8	7	1	5	4	4	1	5	4	4	1	4	3	4	8.7	8.7	8.1	156.05	1401	1401;1400;1400;745;723;557;146	3	10	7	7	27	2.5016e-36	0.81111	0.99511	45.443	5	NaN	NaN	NaN	0	0.80848	0.98097	49.841	3	1.2823	1.2345
B1APX2;Q3UE31	B1APX2;Q3UE31	8;7	8;7	8;7	Uncharacterized protein KIAA0930 homolog	5031439G07Rik	>tr|B1APX2|B1APX2_MOUSE Novel protein OS=Mus musculus GN=5031439G07Rik PE=4 SV=1;>sp|Q3UE31|K0930_MOUSE Uncharacterized protein KIAA0930 homolog OS=Mus musculus PE=1 SV=2	2	8	8	8	7	4	4	7	7	4	4	7	7	4	4	7	18.6	18.6	18.6	50.235	447	447;404	58	33	48	44	183	7.8527e-43	1.1166	1.3058	49.238	4	1.3241	1.782	10.383	2	NaN	NaN	NaN	0	NaN	NaN
B1AQ77;CON__A2A4G1;Q61414	B1AQ77;CON__A2A4G1;Q61414	5;5;5	1;1;1	1;1;1	Keratin, type I cytoskeletal 15	Krt15	>tr|B1AQ77|B1AQ77_MOUSE Keratin 15 OS=Mus musculus GN=Krt15 PE=3 SV=1;>A2A4G1 TREMBL:A2A4G1 Tax_Id=10090 Gene_Symbol=Krt15 Keratin complex 1, acidic, gene 15;>sp|Q61414|K1C15_MOUSE Keratin, type I cytoskeletal 15 OS=Mus musculus GN=Krt15 PE=1 SV=2	3	5	1	1	2	4	2	4	0	1	0	0	0	1	0	0	10.7	3.7	3.7	49.493	456	456;456;452		1			1	9.1818e-17	0.85002	1.0562	NaN	1	NaN	NaN	NaN	0	0.85002	1.0562	NaN	1	NaN	NaN
B1AQF4;Q9D7X3;H3BKL8;Q3V2Y9;H3BKD1	B1AQF4;Q9D7X3;H3BKL8;Q3V2Y9;H3BKD1	6;6;4;4;3	6;6;4;4;3	6;6;4;4;3	Dual specificity protein phosphatase 3	Dusp3	>tr|B1AQF4|B1AQF4_MOUSE Dual specificity phosphatase 3 (Vaccinia virus phosphatase VH1-related) OS=Mus musculus GN=Dusp3 PE=4 SV=1;>sp|Q9D7X3|DUS3_MOUSE Dual specificity protein phosphatase 3 OS=Mus musculus GN=Dusp3 PE=1 SV=1;>tr|H3BKL8|H3BKL8_MOUSE Dual-	5	6	6	6	5	5	5	5	5	5	5	5	5	5	5	5	41.4	41.4	41.4	23.223	210	210;185;145;117;118	15	17	11	10	53	1.8808e-180	0.34775	0.48336	57.515	51	0.28163	0.4167	13.614	15	0.32805	0.4539	19.567	16	1.4365	1.3292
B1AQJ2;B0QZF8	B1AQJ2;B0QZF8	4;2	4;2	4;2	Ubiquitin carboxyl-terminal hydrolase 36	Usp36	>sp|B1AQJ2|UBP36_MOUSE Ubiquitin carboxyl-terminal hydrolase 36 OS=Mus musculus GN=Usp36 PE=2 SV=1;>tr|B0QZF8|B0QZF8_MOUSE Ubiquitin carboxyl-terminal hydrolase 36 (Fragment) OS=Mus musculus GN=Usp36 PE=4 SV=1	2	4	4	4	2	1	2	2	2	1	2	2	2	1	2	2	4.6	4.6	4.6	119.91	1098	1098;890	13	3	15	12	43	1.0261e-18	1.0001	0.77351	NaN	1	1.0001	0.77351	NaN	1	NaN	NaN	NaN	0	NaN	NaN
G3X9T7;O08573;B1AQR8;O08573-2	G3X9T7;O08573;B1AQR8;O08573-2	12;12;12;12	12;12;12;12	12;12;12;12	Galectin-9	Lgals9	>tr|G3X9T7|G3X9T7_MOUSE Galectin-9 OS=Mus musculus GN=Lgals9 PE=4 SV=1;>sp|O08573|LEG9_MOUSE Galectin-9 OS=Mus musculus GN=Lgals9 PE=1 SV=1;>tr|B1AQR8|B1AQR8_MOUSE Galectin-9 OS=Mus musculus GN=Lgals9 PE=4 SV=1;>sp|O08573-2|LEG9_MOUSE Isoform Short of Gale	4	12	12	12	6	9	10	7	6	9	10	7	6	9	10	7	46.2	46.2	46.2	40.021	353	353;353;352;322	23	28	46	28	125	1.1101e-217	1.094	1.0871	43.071	122	0.58395	0.8142	29.235	22	0.52914	0.73155	39.628	28	1.3421	1.2785
B1AQY2;Q69ZH9;F8VQ11;D6RDB5	B1AQY2;Q69ZH9;F8VQ11;D6RDB5	12;12;11;6	12;12;11;6	9;9;8;6	Rho GTPase-activating protein 23	Arhgap23	>tr|B1AQY2|B1AQY2_MOUSE Rho GTPase activating protein 23 OS=Mus musculus GN=Arhgap23 PE=4 SV=1;>sp|Q69ZH9|RHG23_MOUSE Rho GTPase-activating protein 23 OS=Mus musculus GN=Arhgap23 PE=1 SV=2;>tr|F8VQ11|F8VQ11_MOUSE Rho GTPase-activating protein 23 OS=Mus mus	4	12	12	9	6	6	8	8	6	6	8	8	4	4	5	6	11.1	11.1	7.5	162.21	1488	1488;1483;1277;634	17	23	13	19	72	1.2257e-47	0.87294	0.97966	59.391	2	0.47284	0.64371	NaN	1	NaN	NaN	NaN	0	NaN	NaN
B1AQZ0;B1AQY9;Q8CHH9-2;Q8CHH9;B7ZC46;E0CYM4	B1AQZ0;B1AQY9;Q8CHH9-2;Q8CHH9;B7ZC46	13;13;13;13;12;1	9;9;9;9;8;1	9;9;9;9;8;1	Septin-8	2008-09-01	>tr|B1AQZ0|B1AQZ0_MOUSE Septin 8 OS=Mus musculus GN=Sept8 PE=3 SV=1;>tr|B1AQY9|B1AQY9_MOUSE Septin 8 OS=Mus musculus GN=Sept8 PE=3 SV=1;>sp|Q8CHH9-2|SEPT8_MOUSE Isoform 2 of Septin-8 OS=Mus musculus GN=Sept8;>sp|Q8CHH9|SEPT8_MOUSE Septin-8 OS=Mus musculus	6	13	9	9	8	5	6	7	6	3	3	4	6	3	3	4	32.2	25	25	55.874	484	484;442;430;429;440;51	12	7	4	4	27	1.9954e-85	1.0388	1.5066	68.194	21	1.1222	1.7094	13.039	8	1.2044	1.8331	35.322	5	0.46805	0.45306
B1AQZ2;P28741;Q3UI47;Q3TET1;B1AQZ5;F6V6Z9	B1AQZ2;P28741;Q3UI47;Q3TET1;B1AQZ5	6;6;6;6;3;1	6;6;6;6;3;1	6;6;6;6;3;1	Kinesin-like protein KIF3A	Kif3a	>tr|B1AQZ2|B1AQZ2_MOUSE Kinesin family member 3A OS=Mus musculus GN=Kif3a PE=3 SV=1;>sp|P28741|KIF3A_MOUSE Kinesin-like protein KIF3A OS=Mus musculus GN=Kif3a PE=1 SV=2;>tr|Q3UI47|Q3UI47_MOUSE Kinesin family member 3A OS=Mus musculus GN=Kif3a PE=2 SV=1;>tr	6	6	6	6	1	2	5	3	1	2	5	3	1	2	5	3	10.5	10.5	10.5	82.633	725	725;701;698;694;185;178	4	5	10	8	27	5.3068e-55	2.1253	2.0072	74.803	13	NaN	NaN	NaN	0	0.35911	0.44397	NaN	1	2.1445	2.009
B1AR10;B1AR09	B1AR10;B1AR09	3;3	3;3	3;3		Mllt6	>tr|B1AR10|B1AR10_MOUSE Myeloid/lymphoid or mixed lineage-leukemia translocation to 6 homolog (Drosophila) OS=Mus musculus GN=Mllt6 PE=4 SV=1;>tr|B1AR09|B1AR09_MOUSE Myeloid/lymphoid or mixed lineage-leukemia translocation to 6 homolog (Drosophila) OS=Mus	2	3	3	3	0	2	0	2	0	2	0	2	0	2	0	2	4.1	4.1	4.1	113.26	1109	1109;1079		3		2	5	2.4673e-40	NaN	NaN	NaN	0	NaN	NaN	NaN	0	NaN	NaN	NaN	0	NaN	NaN
B1AR17;E9Q614;F7C528;F6V4V3	B1AR17;E9Q614;F7C528	15;15;15;3	5;5;5;1	4;4;4;0		Chd3	>tr|B1AR17|B1AR17_MOUSE Chromodomain helicase DNA binding protein 3 OS=Mus musculus GN=Chd3 PE=4 SV=1;>tr|E9Q614|E9Q614_MOUSE Protein Chd3 OS=Mus musculus GN=Chd3 PE=4 SV=1;>tr|F7C528|F7C528_MOUSE Protein Chd3 (Fragment) OS=Mus musculus GN=Chd3 PE=4 SV=1	4	15	5	4	3	9	9	8	1	2	3	3	1	2	2	3	10.3	4.1	3	232.74	2055	2055;2021;1886;198	21	20	23	24	88	2.7385e-195	1.6262	1.8372	43.144	3	NaN	NaN	NaN	0	NaN	NaN	NaN	0	1.6262	1.8372
B1AR74;Q8CCN5;Q0VF62;F7C0F2;F7CPM1;B1AR76;Q8CCN5-2;F6VJ09	B1AR74;Q8CCN5;Q0VF62;F7C0F2;F7CPM1;B1AR76	3;3;3;3;3;3;1;1	3;3;3;3;3;3;1;1	3;3;3;3;3;3;1;1	Breast carcinoma-amplified sequence 3 homolog	Bcas3	>tr|B1AR74|B1AR74_MOUSE Breast carcinoma amplified sequence 3 OS=Mus musculus GN=Bcas3 PE=4 SV=1;>sp|Q8CCN5|BCAS3_MOUSE Breast carcinoma-amplified sequence 3 homolog OS=Mus musculus GN=Bcas3 PE=1 SV=2;>tr|Q0VF62|Q0VF62_MOUSE Bcas3 protein OS=Mus musculus G	8	3	3	3	3	3	3	3	3	3	3	3	3	3	3	3	5.2	5.2	5.2	102.77	943	943;928;913;693;477;458;527;86	17	21	22	18	78	6.7125e-35	0.6415	0.71973	40.72	14	0.78081	0.99057	29.109	2	0.92505	1.0772	16.509	4	0.63633	0.69572
B1ARD6;F6UG04;F8VQC3	B1ARD6;F6UG04	29;21;6	29;21;6	25;19;5		Slfn9	>tr|B1ARD6|B1ARD6_MOUSE Protein Slfn9 OS=Mus musculus GN=Slfn9 PE=4 SV=1;>tr|F6UG04|F6UG04_MOUSE Protein Slfn9 (Fragment) OS=Mus musculus GN=Slfn9 PE=4 SV=1	3	29	29	25	9	9	26	20	9	9	26	20	8	7	22	18	38.6	38.6	32.4	103.99	910	910;642;847	14	17	48	40	119	2.6735e-212	2.6342	2.5721	94.707	102	0.33164	0.45928	51.9	13	0.3365	0.44947	34.116	13	2.7693	2.8037
B1ART2;B1ART1;F6XI52	B1ART2;B1ART1	8;8;3	8;8;3	8;8;3		Vps13d	>tr|B1ART2|B1ART2_MOUSE Protein Vps13d OS=Mus musculus GN=Vps13d PE=4 SV=1;>tr|B1ART1|B1ART1_MOUSE Protein Vps13d OS=Mus musculus GN=Vps13d PE=4 SV=1	3	8	8	8	2	1	5	3	2	1	5	3	2	1	5	3	2	2	2	490.18	4384	4384;4359;1078	4	2	5	3	14	1.6652e-13	0.96655	0.93456	78.653	6	1.0074	1.5291	NaN	1	NaN	NaN	NaN	0	1.0822	0.974
E9PVY8;B1ARU4;E9QA63;Q9QXZ0;Q9QXZ0-2;E9QNP1;Q9QXZ0-4;F6YKN8;F6RCJ3;F7AB76;Q9CYG3	E9PVY8;B1ARU4;E9QA63;Q9QXZ0;Q9QXZ0-2;E9QNP1;Q9QXZ0-4	181;181;177;176;155;152;152;16;12;10;9	180;180;176;175;155;152;152;16;12;10;9	0;0;0;0;0;0;0;0;0;0;0	Microtubule-actin cross-linking factor 1	Macf1	>tr|E9PVY8|E9PVY8_MOUSE Microtubule-actin cross-linking factor 1 OS=Mus musculus GN=Macf1 PE=4 SV=2;>tr|B1ARU4|B1ARU4_MOUSE Microtubule-actin cross-linking factor 1 OS=Mus musculus GN=Macf1 PE=4 SV=1;>tr|E9QA63|E9QA63_MOUSE Microtubule-actin cross-linking	11	181	180	0	87	68	147	118	86	67	146	117	0	0	0	0	32.9	32.8	0	831.87	7355	7355;7353;7351;7354;5327;5478;5478;544;452;370;393	163	120	308	190	781	0	0.71106	0.71039	67.435	661	1.5623	2.3435	34.942	129	1.4867	2.0989	30.165	99	0.5978	0.57501
Q99LY9;B1ARW4	Q99LY9;B1ARW4	6;6	6;6	6;6	NADH dehydrogenase [ubiquinone] iron-sulfur protein 5	Ndufs5	>sp|Q99LY9|NDUS5_MOUSE NADH dehydrogenase [ubiquinone] iron-sulfur protein 5 OS=Mus musculus GN=Ndufs5 PE=1 SV=3;>tr|B1ARW4|B1ARW4_MOUSE NADH dehydrogenase (Ubiquinone) Fe-S protein 5 (Fragment) OS=Mus musculus GN=Ndufs5 PE=4 SV=1	2	6	6	6	1	5	1	6	1	5	1	6	1	5	1	6	40.6	40.6	40.6	12.648	106	106;91	1	8	1	9	19	7.0181e-17	1.1472	1.3384	23.352	19	0.46308	0.66599	NaN	1	0.8093	1.1619	22.711	8	1.2928	1.3384
Q07243;B1ARW6	Q07243;B1ARW6	1;1	1;1	1;1	Metal regulatory transcription factor 1	Mtf1	>sp|Q07243|MTF1_MOUSE Metal regulatory transcription factor 1 OS=Mus musculus GN=Mtf1 PE=2 SV=2;>tr|B1ARW6|B1ARW6_MOUSE Metal regulatory transcription factor 1 (Fragment) OS=Mus musculus GN=Mtf1 PE=4 SV=1	2	1	1	1	1	1	1	1	1	1	1	1	1	1	1	1	1.9	1.9	1.9	72.602	675	675;142	1	4	2	3	10	2.1606e-20	NaN	NaN	NaN	0	NaN	NaN	NaN	0	NaN	NaN	NaN	0	NaN	NaN
Q9D032;B1AS37;Q9D032-2;B1AS34;D6RG78	Q9D032;B1AS37;Q9D032-2;B1AS34	3;3;3;2;1	1;1;1;0;0	1;1;1;0;0	Single-stranded DNA-binding protein 3	Ssbp3	>sp|Q9D032|SSBP3_MOUSE Single-stranded DNA-binding protein 3 OS=Mus musculus GN=Ssbp3 PE=2 SV=2;>tr|B1AS37|B1AS37_MOUSE Single-stranded DNA binding protein 3 OS=Mus musculus GN=Ssbp3 PE=4 SV=1;>sp|Q9D032-2|SSBP3_MOUSE Isoform 2 of Single-stranded DNA-bindi	5	3	1	1	1	2	3	1	1	1	1	1	1	1	1	1	11.1	4.4	4.4	40.421	388	388;368;361;226;49	13	11	12	6	42	6.8477e-135	NaN	NaN	NaN	0	NaN	NaN	NaN	0	NaN	NaN	NaN	0	NaN	NaN
Q66T02;Q66T02-2;B1AS67	Q66T02;Q66T02-2;B1AS67	3;3;3	3;3;3	3;3;3	Pleckstrin homology domain-containing family G member 5	Plekhg5	>sp|Q66T02|PKHG5_MOUSE Pleckstrin homology domain-containing family G member 5 OS=Mus musculus GN=Plekhg5 PE=1 SV=1;>sp|Q66T02-2|PKHG5_MOUSE Isoform 2 of Pleckstrin homology domain-containing family G member 5 OS=Mus musculus GN=Plekhg5;>tr|B1AS67|B1AS67_M	3	3	3	3	1	3	1	2	1	3	1	2	1	3	1	2	3.1	3.1	3.1	118.92	1073	1073;1071;1060	2	7	2	3	14	2.9787e-16	NaN	NaN	NaN	0	NaN	NaN	NaN	0	NaN	NaN	NaN	0	NaN	NaN
B1ASA5	B1ASA5	1	1	1		Zfp362	>tr|B1ASA5|B1ASA5_MOUSE Protein Zfp362 OS=Mus musculus GN=Zfp362 PE=2 SV=1	1	1	1	1	1	1	1	0	1	1	1	0	1	1	1	0	3.6	3.6	3.6	45.672	418	418	2	2	2		6	6.8914e-05	NaN	NaN	NaN	0	NaN	NaN	NaN	0	NaN	NaN	NaN	0	NaN	NaN
B1ASK8;Q6P073;B0QZM1;B0QZM2	B1ASK8;Q6P073;B0QZM1	5;5;3;2	5;5;3;2	5;5;3;2	Ubiquitin-conjugating enzyme E2 J2	Ube2j2	>tr|B1ASK8|B1ASK8_MOUSE Ubiquitin-conjugating enzyme E2 J2 OS=Mus musculus GN=Ube2j2 PE=4 SV=1;>sp|Q6P073|UB2J2_MOUSE Ubiquitin-conjugating enzyme E2 J2 OS=Mus musculus GN=Ube2j2 PE=1 SV=1;>tr|B0QZM1|B0QZM1_MOUSE Ubiquitin-conjugating enzyme E2 J2 OS=Mus m	4	5	5	5	3	0	2	1	3	0	2	1	3	0	2	1	38.7	38.7	38.7	30.292	271	271;259;232;120	4		2	1	7	1.6816e-18	0.65117	0.79759	13.491	7	0.56729	0.87147	16.675	4	NaN	NaN	NaN	0	0.83585	0.78157
B1ASP2;P52332;E9QJS1;Q9R117	B1ASP2;P52332	40;39;1;1	40;39;1;1	40;39;1;1	Tyrosine-protein kinase;Tyrosine-protein kinase JAK1	Jak1	>tr|B1ASP2|B1ASP2_MOUSE Tyrosine-protein kinase OS=Mus musculus GN=Jak1 PE=3 SV=1;>sp|P52332|JAK1_MOUSE Tyrosine-protein kinase JAK1 OS=Mus musculus GN=Jak1 PE=1 SV=1	4	40	40	40	10	17	33	24	10	17	33	24	10	17	33	24	48.6	48.6	48.6	133.35	1153	1153;1153;1207;1180	20	29	52	42	143	0	0.4159	0.41652	113.39	141	3.2633	4.7137	42.868	20	2.8941	3.8482	15.253	29	0.35496	0.35872
Q9DCZ4;B1ASQ2;Q9D186	Q9DCZ4;B1ASQ2;Q9D186	8;8;8	8;8;8	8;8;8	Apolipoprotein O	Apoo	>sp|Q9DCZ4|APOO_MOUSE Apolipoprotein O OS=Mus musculus GN=Apoo PE=2 SV=1;>tr|B1ASQ2|B1ASQ2_MOUSE Apolipoprotein O OS=Mus musculus GN=Apoo PE=4 SV=1;>tr|Q9D186|Q9D186_MOUSE Apolipoprotein O OS=Mus musculus GN=Apoo PE=2 SV=1	3	8	8	8	3	4	7	6	3	4	7	6	3	4	7	6	51.9	51.9	51.9	24.136	212	212;198;164	6	8	13	11	38	2.7843e-78	1.0142	1.0618	15.386	37	0.81073	1.2314	21.786	6	0.8183	1.1633	17.761	8	1.0142	0.96371
E9Q1Q1;E9QLW6;B1AST7;Q60592;B1AST8;B1AST5;B1AST6	E9Q1Q1;E9QLW6;B1AST7;Q60592;B1AST8	13;13;13;13;13;2;2	12;12;12;12;12;2;2	11;11;11;11;11;2;2	Microtubule-associated serine/threonine-protein kinase 2	Mast2	>tr|E9Q1Q1|E9Q1Q1_MOUSE Microtubule-associated serine/threonine-protein kinase 2 OS=Mus musculus GN=Mast2 PE=4 SV=1;>tr|E9QLW6|E9QLW6_MOUSE Microtubule-associated serine/threonine-protein kinase 2 OS=Mus musculus GN=Mast2 PE=4 SV=1;>tr|B1AST7|B1AST7_MOUSE	7	13	12	11	10	10	9	10	9	10	9	10	9	10	9	9	9.1	8.7	8.2	198.05	1800	1800;1794;1739;1734;1733;203;144	65	53	61	51	230	9.5474e-140	1.141	1.0444	NaN	1	NaN	NaN	NaN	0	NaN	NaN	NaN	0	NaN	NaN
B1ASU0;P59823	B1ASU0;P59823	2;2	2;2	2;2	Interleukin-1 receptor accessory protein-like 1	Il1rapl1	>tr|B1ASU0|B1ASU0_MOUSE Interleukin 1 receptor accessory protein-like 1 OS=Mus musculus GN=Il1rapl1 PE=4 SV=1;>sp|P59823|IRPL1_MOUSE Interleukin-1 receptor accessory protein-like 1 OS=Mus musculus GN=Il1rapl1 PE=1 SV=1	2	2	2	2	2	0	0	0	2	0	0	0	2	0	0	0	3.2	3.2	3.2	79.78	696	696;695	3				3	0.00024816	2.0449	2.9999	1.7799	2	2.0449	2.9999	1.7799	2	NaN	NaN	NaN	0	NaN	NaN
B1ASU9;O55047;O55047-2;O55047-3;B7ZC85;F6XSD0;D6RHM1;B7ZC84	B1ASU9;O55047;O55047-2;O55047-3	7;5;5;4;3;3;1;1	7;5;5;4;3;3;1;1	4;2;3;1;1;2;1;1	Serine/threonine-protein kinase tousled-like 2	Tlk2	>tr|B1ASU9|B1ASU9_MOUSE Serine/threonine-protein kinase tousled-like 2 OS=Mus musculus GN=Tlk2 PE=4 SV=1;>sp|O55047|TLK2_MOUSE Serine/threonine-protein kinase tousled-like 2 OS=Mus musculus GN=Tlk2 PE=1 SV=2;>sp|O55047-2|TLK2_MOUSE Isoform 2 of Serine/thre	8	7	7	4	3	2	2	1	3	2	2	1	1	2	1	0	13.1	13.1	8.1	85.341	750	750;718;697;602;633;235;112;93	4	3	2	1	10	2.0165e-19	0.75961	0.77525	54.981	5	0.49301	0.69659	8.3091	2	NaN	NaN	NaN	0	1.2995	1.3374
K4DI59;P97386;Q80ZH7;Q3UC82;P97386-2;B1AT03;Q3TJN5;G3UYI8	K4DI59;P97386;Q80ZH7;Q3UC82;P97386-2;B1AT03;Q3TJN5	4;4;4;4;4;4;3;1	4;4;4;4;4;4;3;1	4;4;4;4;4;4;3;1	DNA ligase 3;DNA ligase	Lig3	>tr|K4DI59|K4DI59_MOUSE DNA ligase OS=Mus musculus GN=Lig3 PE=3 SV=1;>sp|P97386|DNLI3_MOUSE DNA ligase 3 OS=Mus musculus GN=Lig3 PE=1 SV=2;>tr|Q80ZH7|Q80ZH7_MOUSE DNA ligase OS=Mus musculus GN=Lig3 PE=2 SV=1;>tr|Q3UC82|Q3UC82_MOUSE DNA ligase OS=Mus muscul	8	4	4	4	1	2	3	4	1	2	3	4	1	2	3	4	5.8	5.8	5.8	113.16	1016	1016;1015;1012;1011;956;953;431;174	7	6	11	10	34	3.4859e-131	1.12	0.98691	1.994	4	NaN	NaN	NaN	0	NaN	NaN	NaN	0	1.1176	1.0034
Q8CHV6;B1AT25	Q8CHV6;B1AT25	1;1	1;1	1;1	Transcriptional adapter 2-alpha	Tada2a	>sp|Q8CHV6|TAD2A_MOUSE Transcriptional adapter 2-alpha OS=Mus musculus GN=Tada2a PE=1 SV=1;>tr|B1AT25|B1AT25_MOUSE Transcriptional adapter 2-alpha (Fragment) OS=Mus musculus GN=Tada2a PE=4 SV=1	2	1	1	1	0	1	0	1	0	1	0	1	0	1	0	1	3.4	3.4	3.4	51.338	443	443;235		6		4	10	0.00063631	NaN	NaN	NaN	0	NaN	NaN	NaN	0	NaN	NaN	NaN	0	NaN	NaN
B1AT82;Q9D0M1;B1AT84;B1AT83	B1AT82;Q9D0M1;B1AT84	13;13;8;6	13;13;8;6	11;11;7;6	Phosphoribosyl pyrophosphate synthase-associated protein 1	Prpsap1	>tr|B1AT82|B1AT82_MOUSE MCG6846, isoform CRA_c OS=Mus musculus GN=Prpsap1 PE=4 SV=1;>sp|Q9D0M1|KPRA_MOUSE Phosphoribosyl pyrophosphate synthase-associated protein 1 OS=Mus musculus GN=Prpsap1 PE=1 SV=1;>tr|B1AT84|B1AT84_MOUSE Phosphoribosyl pyrophosphate s	4	13	13	11	8	7	11	11	8	7	11	11	8	7	9	10	46.5	46.5	41	42.467	385	385;356;175;195	19	16	25	23	83	1.0322e-243	0.7768	0.82399	23.241	83	0.78357	0.87092	17.323	19	0.81971	0.97795	18.547	16	0.75491	0.80458
B1ATC3;B7ZC94;Q3UHC0	B1ATC3;B7ZC94;Q3UHC0	3;3;3	3;3;3	3;3;3	Trinucleotide repeat-containing gene 6C protein	Tnrc6c	>tr|B1ATC3|B1ATC3_MOUSE Trinucleotide repeat containing 6C OS=Mus musculus GN=Tnrc6c PE=4 SV=1;>tr|B7ZC94|B7ZC94_MOUSE Trinucleotide repeat containing 6C (Fragment) OS=Mus musculus GN=Tnrc6c PE=4 SV=1;>sp|Q3UHC0|TNR6C_MOUSE Trinucleotide repeat-containing	3	3	3	3	0	2	1	1	0	2	1	1	0	2	1	1	2.3	2.3	2.3	198.21	1900	1900;1732;1690		4	1	6	11	4.7772e-24	0.77833	0.78016	NaN	1	NaN	NaN	NaN	0	NaN	NaN	NaN	0	0.77833	0.78016
Q8K296;B1ATD4;B1ATD5;Q8K296-2	Q8K296;B1ATD4;B1ATD5;Q8K296-2	3;3;3;3	3;3;3;3	3;3;3;3	Myotubularin-related protein 3	Mtmr3	>sp|Q8K296|MTMR3_MOUSE Myotubularin-related protein 3 OS=Mus musculus GN=Mtmr3 PE=1 SV=2;>tr|B1ATD4|B1ATD4_MOUSE Myotubularin related protein 3 (Fragment) OS=Mus musculus GN=Mtmr3 PE=4 SV=1;>tr|B1ATD5|B1ATD5_MOUSE MCG9626, isoform CRA_b OS=Mus musculus GN=	4	3	3	3	1	2	2	1	1	2	2	1	1	2	2	1	4.3	4.3	4.3	133.84	1196	1196;1167;1159;1075	2	6	5	4	17	1.9254e-65	1.077	1.0709	17.123	2	NaN	NaN	NaN	0	NaN	NaN	NaN	0	1.077	1.0709
B1ATI0;B1AV77;P47740;P47739	B1ATI0;B1AV77;P47740	13;13;13;1	13;13;13;1	13;13;13;1	Aldehyde dehydrogenase;Fatty aldehyde dehydrogenase	Aldh3a2	>tr|B1ATI0|B1ATI0_MOUSE Aldehyde dehydrogenase OS=Mus musculus GN=Aldh3a2 PE=3 SV=1;>tr|B1AV77|B1AV77_MOUSE Aldehyde dehydrogenase OS=Mus musculus GN=Aldh3a2 PE=3 SV=1;>sp|P47740|AL3A2_MOUSE Fatty aldehyde dehydrogenase OS=Mus musculus GN=Aldh3a2 PE=2 SV=2	4	13	13	13	2	8	8	5	2	8	8	5	2	8	8	5	30.6	30.6	30.6	59.276	532	532;487;484;453	4	16	9	7	36	6.3525e-58	1.0304	1.4665	53.769	36	1.0627	1.5764	34.111	4	1.1084	1.6457	10.588	16	0.59475	0.55965
Q60780;Q3U432;B1ATI9;Q60780-2	Q60780;Q3U432;B1ATI9;Q60780-2	2;2;2;1	2;2;2;1	2;2;2;1	Growth arrest-specific protein 7	Gas7	>sp|Q60780|GAS7_MOUSE Growth arrest-specific protein 7 OS=Mus musculus GN=Gas7 PE=1 SV=1;>tr|Q3U432|Q3U432_MOUSE Growth arrest-specific protein 7 OS=Mus musculus GN=Gas7 PE=2 SV=1;>tr|B1ATI9|B1ATI9_MOUSE Growth arrest specific 7 OS=Mus musculus GN=Gas7 PE=	4	2	2	2	0	0	1	1	0	0	1	1	0	0	1	1	6.4	6.4	6.4	48.173	421	421;416;412;340			1	3	4	1.1572e-09	NaN	NaN	NaN	0	NaN	NaN	NaN	0	NaN	NaN	NaN	0	NaN	NaN
Q80Y81;Q80Y81-2;B1ATP7;B1ATP9	Q80Y81;Q80Y81-2;B1ATP7	29;29;29;6	29;29;29;6	29;29;29;6	Zinc phosphodiesterase ELAC protein 2	Elac2	>sp|Q80Y81|RNZ2_MOUSE Zinc phosphodiesterase ELAC protein 2 OS=Mus musculus GN=Elac2 PE=1 SV=1;>sp|Q80Y81-2|RNZ2_MOUSE Isoform 2 of Zinc phosphodiesterase ELAC protein 2 OS=Mus musculus GN=Elac2;>tr|B1ATP7|B1ATP7_MOUSE ElaC homolog 2 (E. coli) OS=Mus muscu	4	29	29	29	19	4	20	14	19	4	20	14	19	4	20	14	45.5	45.5	45.5	92.718	831	831;824;823;208	32	7	30	34	103	2.4697e-190	0.99036	1.0176	14.884	78	0.69122	0.95066	18.183	26	0.71404	0.95286	18.528	7	1.065	1.0691
Q64518;E9Q559;Q64518-3;B1ATS5;Q64518-2;B1ATS4	Q64518;E9Q559;Q64518-3;B1ATS5;Q64518-2;B1ATS4	8;8;8;8;8;8	1;1;1;1;1;1	1;1;1;1;1;1	Sarcoplasmic/endoplasmic reticulum calcium ATPase 3	Atp2a3	>sp|Q64518|AT2A3_MOUSE Sarcoplasmic/endoplasmic reticulum calcium ATPase 3 OS=Mus musculus GN=Atp2a3 PE=2 SV=3;>tr|E9Q559|E9Q559_MOUSE Sarcoplasmic/endoplasmic reticulum calcium ATPase 3 OS=Mus musculus GN=Atp2a3 PE=3 SV=1;>sp|Q64518-3|AT2A3_MOUSE Isoform	6	8	1	1	5	5	7	4	0	1	0	0	0	1	0	0	7.4	0.7	0.7	113.64	1038	1038;1026;1025;1020;999;981		1			1	3.2576e-246	0.88783	1.3711	NaN	1	NaN	NaN	NaN	0	0.88783	1.3711	NaN	1	NaN	NaN
Q3UMA3;Q99LI8;B1ATZ1;B1ATZ0;B1ATY9;F6VV02	Q3UMA3;Q99LI8;B1ATZ1;B1ATZ0;B1ATY9	13;13;13;13;7;3	13;13;13;13;7;3	13;13;13;13;7;3	Hepatocyte growth factor-regulated tyrosine kinase substrate	Hgs	>tr|Q3UMA3|Q3UMA3_MOUSE Hepatocyte growth factor-regulated tyrosine kinase substrate OS=Mus musculus GN=Hgs PE=2 SV=1;>sp|Q99LI8|HGS_MOUSE Hepatocyte growth factor-regulated tyrosine kinase substrate OS=Mus musculus GN=Hgs PE=1 SV=2;>tr|B1ATZ1|B1ATZ1_MOUSE	6	13	13	13	12	6	8	8	12	6	8	8	12	6	8	8	25	25	25	86.142	776	776;775;767;766;245;294	22	11	15	16	64	9.616e-87	0.89657	0.96598	28.64	64	0.49137	0.68436	38.246	22	0.59834	0.79102	22.575	11	1.027	1.0236
B1AU74;Q9CWP6;Q9CWP6-3;Q9CWP6-2;Q9CWP6-4	B1AU74;Q9CWP6;Q9CWP6-3;Q9CWP6-2	9;9;9;9;3	9;9;9;9;3	9;9;9;9;3	Motile sperm domain-containing protein 2	Mospd2	>tr|B1AU74|B1AU74_MOUSE Motile sperm domain containing 2 OS=Mus musculus GN=Mospd2 PE=4 SV=1;>sp|Q9CWP6|MSPD2_MOUSE Motile sperm domain-containing protein 2 OS=Mus musculus GN=Mospd2 PE=1 SV=2;>sp|Q9CWP6-3|MSPD2_MOUSE Isoform 3 of Motile sperm domain-conta	5	9	9	9	3	1	6	4	3	1	6	4	3	1	6	4	21.2	21.2	21.2	59.81	518	518;518;486;481;164	5	2	10	8	25	5.0431e-22	0.39444	0.38114	102.49	23	2.4748	3.42	10.538	4	2.0916	2.9348	5.615	2	0.35329	0.32134
B1AU75;Q99MD9;B1AU76;Q99MD9-2	B1AU75;Q99MD9;B1AU76	36;35;19;16	36;35;19;16	36;35;19;16	Nuclear autoantigenic sperm protein	Nasp	>tr|B1AU75|B1AU75_MOUSE Nuclear autoantigenic sperm protein OS=Mus musculus GN=Nasp PE=4 SV=1;>sp|Q99MD9|NASP_MOUSE Nuclear autoantigenic sperm protein OS=Mus musculus GN=Nasp PE=1 SV=2;>tr|B1AU76|B1AU76_MOUSE Nuclear autoantigenic sperm protein OS=Mus mus	4	36	36	36	29	20	21	22	29	20	21	22	29	20	21	22	58.6	58.6	58.6	84.012	773	773;773;448;421	70	50	58	49	227	0	0.5709	0.81099	105.82	202	0.19264	0.26758	57.734	60	0.22137	0.31069	53.876	46	1.7116	1.5561
B1AUF1;Q60698;B1AUF2	B1AUF1;Q60698;B1AUF2	1;1;1	1;1;1	1;1;1	Ski oncogene	Ski	>tr|B1AUF1|B1AUF1_MOUSE Ski oncogene OS=Mus musculus GN=Ski PE=4 SV=1;>sp|Q60698|SKI_MOUSE Ski oncogene OS=Mus musculus GN=Ski PE=2 SV=2;>tr|B1AUF2|B1AUF2_MOUSE Ski oncogene OS=Mus musculus GN=Ski PE=4 SV=1	3	1	1	1	1	0	0	0	1	0	0	0	1	0	0	0	1.8	1.8	1.8	80.361	727	727;725;675	2				2	0.0014323	NaN	NaN	NaN	0	NaN	NaN	NaN	0	NaN	NaN	NaN	0	NaN	NaN
B1AUN2;Q3UKV0;B1AUN3	B1AUN2;Q3UKV0;B1AUN3	16;15;15	16;15;15	16;15;15		Eif2b3	>tr|B1AUN2|B1AUN2_MOUSE Eukaryotic translation initiation factor 2B, subunit 3 OS=Mus musculus GN=Eif2b3 PE=4 SV=1;>tr|Q3UKV0|Q3UKV0_MOUSE Protein Eif2b3 OS=Mus musculus GN=Eif2b3 PE=2 SV=1;>tr|B1AUN3|B1AUN3_MOUSE Eukaryotic translation initiation factor 2	3	16	16	16	15	5	9	6	15	5	9	6	15	5	9	6	43.8	43.8	43.8	50.488	452	452;445;401	25	13	14	9	61	4.0381e-55	0.54694	0.8023	38.264	58	0.46732	0.70428	20.854	24	0.53847	0.70915	23.395	11	1.5635	1.4625
Q9R1K9;B1AUQ7;P41209	Q9R1K9;B1AUQ7	5;5;1	5;5;1	5;5;1	Centrin-2	Cetn2	>sp|Q9R1K9|CETN2_MOUSE Centrin-2 OS=Mus musculus GN=Cetn2 PE=1 SV=1;>tr|B1AUQ7|B1AUQ7_MOUSE Centrin 2 (Fragment) OS=Mus musculus GN=Cetn2 PE=4 SV=1	3	5	5	5	1	0	2	2	1	0	2	2	1	0	2	2	22.1	22.1	22.1	19.796	172	172;111;172	1		3	7	11	2.772e-11	1.6536	1.5477	9.9397	3	NaN	NaN	NaN	0	NaN	NaN	NaN	0	1.6536	1.5477
B1AUR6;G8JL47;B1AUR6-2;G3UXR9;G3UYM2	B1AUR6;G8JL47;B1AUR6-2;G3UXR9;G3UYM2	2;2;2;1;1	2;2;2;1;1	2;2;2;1;1	Protein MMS22-like	Mms22l	>sp|B1AUR6|MMS22_MOUSE Protein MMS22-like OS=Mus musculus GN=Mms22l PE=2 SV=1;>tr|G8JL47|G8JL47_MOUSE Protein MMS22-like OS=Mus musculus GN=Mms22l PE=4 SV=1;>sp|B1AUR6-2|MMS22_MOUSE Isoform 2 of Protein MMS22-like OS=Mus musculus GN=Mms22l;>tr|G3UXR9|G3UXR	5	2	2	2	2	2	2	2	2	2	2	2	2	2	2	2	2	2	2	140.58	1238	1238;1198;963;734;101	5	6	6	3	20	1.1576e-07	0.93501	1.0423	23.185	7	0.93501	1.188	NaN	1	1.0775	1.3834	3.6701	2	0.85855	0.86451
Q9QY36;B1AUY7;B1AUY8	Q9QY36;B1AUY7;B1AUY8	11;11;11	11;11;11	3;3;3	N-alpha-acetyltransferase 10	Naa10	>sp|Q9QY36|NAA10_MOUSE N-alpha-acetyltransferase 10 OS=Mus musculus GN=Naa10 PE=1 SV=1;>tr|B1AUY7|B1AUY7_MOUSE N-acetyltransferase ARD1 homolog OS=Mus musculus GN=Naa10 PE=4 SV=1;>tr|B1AUY8|B1AUY8_MOUSE N-acetyltransferase ARD1 homolog OS=Mus musculus GN=N	3	11	11	3	6	3	11	3	6	3	11	3	2	1	3	1	51.1	51.1	14.9	26.519	235	235;233;220	17	7	32	15	71	4.9209e-51	1.0528	1.002	36.296	47	0.64065	1.0157	42.066	10	0.67541	0.91141	12.98	3	1.0931	1.0029
Q78IK4;B1AV14	Q78IK4;B1AV14	4;4	4;4	4;4	Apolipoprotein O-like	Apool	>sp|Q78IK4|APOOL_MOUSE Apolipoprotein O-like OS=Mus musculus GN=Apool PE=2 SV=1;>tr|B1AV14|B1AV14_MOUSE Apolipoprotein O-like OS=Mus musculus GN=Apool PE=4 SV=1	2	4	4	4	4	1	3	1	4	1	3	1	4	1	3	1	25.3	25.3	25.3	29.26	265	265;192	9	2	4	2	17	7.8664e-27	0.85405	1.2687	14.994	17	0.7617	1.1826	13.241	9	0.79268	1.1109	6.6325	2	1.5396	1.4033
B1AV39;Q6IE82	B1AV39;Q6IE82	1;1	1;1	1;1	Protein Jade-3	Phf16	>tr|B1AV39|B1AV39_MOUSE PHD finger protein 16 OS=Mus musculus GN=Phf16 PE=4 SV=1;>sp|Q6IE82|JADE3_MOUSE Protein Jade-3 OS=Mus musculus GN=Phf16 PE=2 SV=1	2	1	1	1	1	1	1	1	1	1	1	1	1	1	1	1	1.7	1.7	1.7	93.585	824	824;823	5	5	2	9	21	1.1947e-60	NaN	NaN	NaN	0	NaN	NaN	NaN	0	NaN	NaN	NaN	0	NaN	NaN
Q8BR70;B1AV66;B1AV65	Q8BR70;B1AV66;B1AV65	1;1;1	1;1;1	1;1;1	Protein YIPF6	Yipf6	>sp|Q8BR70|YIPF6_MOUSE Protein YIPF6 OS=Mus musculus GN=Yipf6 PE=2 SV=1;>tr|B1AV66|B1AV66_MOUSE Protein YIPF6 (Fragment) OS=Mus musculus GN=Yipf6 PE=4 SV=1;>tr|B1AV65|B1AV65_MOUSE Protein YIPF6 (Fragment) OS=Mus musculus GN=Yipf6 PE=4 SV=1	3	1	1	1	1	1	1	1	1	1	1	1	1	1	1	1	6.8	6.8	6.8	26.087	236	236;198;55	4	2	1	5	12	5.8178e-88	NaN	NaN	NaN	0	NaN	NaN	NaN	0	NaN	NaN	NaN	0	NaN	NaN
B1AV75;Q3UJP5	B1AV75;Q3UJP5	2;2	2;2	2;2	Protein C8orf37 homolog	2610301B20Rik	>tr|B1AV75|B1AV75_MOUSE Novel protein OS=Mus musculus GN=2610301B20Rik PE=4 SV=1;>sp|Q3UJP5|CH037_MOUSE Protein C8orf37 homolog OS=Mus musculus PE=1 SV=1	2	2	2	2	2	1	2	0	2	1	2	0	2	1	2	0	12.9	12.9	12.9	23.935	210	210;209	3	1	4		8	1.5495e-09	0.79979	0.92841	22.507	8	0.50466	0.77109	21.711	3	0.44201	0.53698	NaN	1	1.0044	0.95151
B1AVH7	B1AVH7	3	3	3	TBC1 domain family member 2A	Tbc1d2	>sp|B1AVH7|TBD2A_MOUSE TBC1 domain family member 2A OS=Mus musculus GN=Tbc1d2 PE=2 SV=1	1	3	3	3	0	0	2	2	0	0	2	2	0	0	2	2	4.3	4.3	4.3	104.26	922	922			4	2	6	8.3361e-09	1.6685	1.5642	NaN	1	NaN	NaN	NaN	0	NaN	NaN	NaN	0	NaN	NaN
B1AVZ0	B1AVZ0	5	5	5	Uracil phosphoribosyltransferase homolog	Uprt	>sp|B1AVZ0|UPP_MOUSE Uracil phosphoribosyltransferase homolog OS=Mus musculus GN=Uprt PE=2 SV=1	1	5	5	5	2	0	4	0	2	0	4	0	2	0	4	0	29.7	29.7	29.7	34.278	310	310	4		6		10	3.4815e-16	0.76949	0.77534	11.206	10	0.56486	0.77224	8.324	4	NaN	NaN	NaN	0	0.88328	0.79037
Q9Z2C5;B1AW21;Q3UDN6	Q9Z2C5;B1AW21	5;5;1	5;5;1	4;4;1	Myotubularin	Mtm1	>sp|Q9Z2C5|MTM1_MOUSE Myotubularin OS=Mus musculus GN=Mtm1 PE=1 SV=2;>tr|B1AW21|B1AW21_MOUSE Myotubularin OS=Mus musculus GN=Mtm1 PE=4 SV=1	3	5	5	4	2	0	2	2	2	0	2	2	1	0	1	2	10.9	10.9	9.5	69.558	603	603;572;162	3		5	2	10	4.3837e-10	0.78963	0.84847	38.223	10	0.91195	1.1844	27.479	3	NaN	NaN	NaN	0	0.64893	0.61374
B1AWD9;B1AWD8;O08585;B1AWE1;Q6PFA2;B1AWE0	B1AWD9;B1AWD8;O08585;B1AWE1;Q6PFA2;B1AWE0	10;10;10;10;10;10	10;10;10;10;10;10	10;10;10;10;10;10	Clathrin light chain A	Clta	>tr|B1AWD9|B1AWD9_MOUSE Clathrin light chain A OS=Mus musculus GN=Clta PE=4 SV=1;>tr|B1AWD8|B1AWD8_MOUSE Clathrin light chain A OS=Mus musculus GN=Clta PE=4 SV=1;>sp|O08585|CLCA_MOUSE Clathrin light chain A OS=Mus musculus GN=Clta PE=1 SV=2;>tr|B1AWE1|B1AW	6	10	10	10	7	9	9	7	7	9	9	7	7	9	9	7	32.3	32.3	32.3	27.061	248	248;236;235;230;218;216	23	26	21	21	91	0	0.81291	0.96066	16.192	64	0.70122	1.0198	12.974	13	0.74852	1.0829	13.377	22	0.88085	0.83753
B1AWL2;B1AWL5;B1AWL4	B1AWL2	5;1;1	5;1;1	5;1;1		Zfp462	>tr|B1AWL2|B1AWL2_MOUSE Protein Zfp462 OS=Mus musculus GN=Zfp462 PE=4 SV=1	3	5	5	5	3	3	4	4	3	3	4	4	3	3	4	4	1.9	1.9	1.9	282.71	2495	2495;1408;1407	11	8	6	8	33	1.8496e-18	1.0146	1.0264	12.121	6	0.70942	0.98837	NaN	1	0.6582	0.86957	NaN	1	1.2882	1.252
B1AXD8	B1AXD8	4	4	4	Akirin-2	Akirin2	>sp|B1AXD8|AKIR2_MOUSE Akirin-2 OS=Mus musculus GN=Akirin2 PE=2 SV=1	1	4	4	4	2	3	4	3	2	3	4	3	2	3	4	3	28.4	28.4	28.4	22.113	201	201	7	13	9	11	40	2.6514e-128	1.2118	1.1687	NaN	1	NaN	NaN	NaN	0	NaN	NaN	NaN	0	1.2118	1.1687
B1AXH8;Q3UQX8;Q61909	B1AXH8;Q3UQX8;Q61909	3;3;3	3;3;3	3;3;3	Protein CBFA2T1	Runx1t1	>tr|B1AXH8|B1AXH8_MOUSE Protein CBFA2T1 OS=Mus musculus GN=Runx1t1 PE=4 SV=1;>tr|Q3UQX8|Q3UQX8_MOUSE Protein CBFA2T1 OS=Mus musculus GN=Runx1t1 PE=2 SV=1;>sp|Q61909|MTG8_MOUSE Protein CBFA2T1 OS=Mus musculus GN=Runx1t1 PE=2 SV=1	3	3	3	3	1	1	1	3	1	1	1	3	1	1	1	3	7.1	7.1	7.1	67.508	604	604;584;577	5	2	4	8	19	5.9123e-17	NaN	NaN	NaN	0	NaN	NaN	NaN	0	NaN	NaN	NaN	0	NaN	NaN
J3QMP9;Q62036;B1AXI9	J3QMP9;Q62036;B1AXI9	3;3;3	3;3;3	3;3;3	5-azacytidine-induced protein 1	Azi1	>tr|J3QMP9|J3QMP9_MOUSE 5-azacytidine-induced protein 1 OS=Mus musculus GN=Azi1 PE=4 SV=1;>sp|Q62036|AZI1_MOUSE 5-azacytidine-induced protein 1 OS=Mus musculus GN=Azi1 PE=1 SV=2;>tr|B1AXI9|B1AXI9_MOUSE 5-azacytidine induced 1 OS=Mus musculus GN=Azi1 PE=2 S	3	3	3	3	0	2	1	2	0	2	1	2	0	2	1	2	4	4	4	120.33	1060	1060;1060;1059		7	1	4	12	2.082e-09	0.32707	0.45138	NaN	1	NaN	NaN	NaN	0	0.32707	0.45138	NaN	1	NaN	NaN
Q3U3N6;B1AXJ1;B1AXJ2	Q3U3N6;B1AXJ1;B1AXJ2	2;2;2	2;2;2	2;2;2	AP-4 complex accessory subunit tepsin	2410002I01Rik	>sp|Q3U3N6|AP4AT_MOUSE AP-4 complex accessory subunit tepsin OS=Mus musculus GN=Enthd2 PE=1 SV=1;>tr|B1AXJ1|B1AXJ1_MOUSE Novel protein OS=Mus musculus GN=Enthd2 PE=4 SV=1;>tr|B1AXJ2|B1AXJ2_MOUSE Novel protein OS=Mus musculus GN=Enthd2 PE=4 SV=1	3	2	2	2	1	2	1	2	1	2	1	2	1	2	1	2	5.9	5.9	5.9	60.761	573	573;567;505	2	4	3	3	12	4.6637e-10	NaN	NaN	NaN	0	NaN	NaN	NaN	0	NaN	NaN	NaN	0	NaN	NaN
B1AXY5;P15535;P15535-2	B1AXY5;P15535;P15535-2	2;1;1	2;1;1	2;1;1	Beta-1,4-galactosyltransferase 1;Lactose synthase A protein;N-acetyllactosamine synthase;Beta-N-acetylglucosaminylglycopeptide beta-1,4-galactosyltransferase;Beta-N-acetylglucosaminyl-glycolipid beta-1,4-galactosyltransferase;Processed beta-1,4-galactosyltransferase 1	B4galt1	>tr|B1AXY5|B1AXY5_MOUSE Beta-1,4-galactosyltransferase 1 OS=Mus musculus GN=B4galt1 PE=4 SV=1;>sp|P15535|B4GT1_MOUSE Beta-1,4-galactosyltransferase 1 OS=Mus musculus GN=B4galt1 PE=2 SV=1;>sp|P15535-2|B4GT1_MOUSE Isoform Short of Beta-1,4-galactosyltransfer	3	2	2	2	0	1	0	1	0	1	0	1	0	1	0	1	7.8	7.8	7.8	37.688	346	346;399;386		1		1	2	7.9676e-06	0.63252	0.68765	18.961	2	NaN	NaN	NaN	0	0.59929	0.78632	NaN	1	NaN	NaN
B1AY10;B1AY10-3;B1AY10-2	B1AY10;B1AY10-3;B1AY10-2	2;2;2	2;2;2	2;2;2	Transcriptional repressor NF-X1	Nfx1	>sp|B1AY10|NFX1_MOUSE Transcriptional repressor NF-X1 OS=Mus musculus GN=Nfx1 PE=2 SV=1;>sp|B1AY10-3|NFX1_MOUSE Isoform 3 of Transcriptional repressor NF-X1 OS=Mus musculus GN=Nfx1;>sp|B1AY10-2|NFX1_MOUSE Isoform 2 of Transcriptional repressor NF-X1 OS=Mus	3	2	2	2	1	1	2	1	1	1	2	1	1	1	2	1	1.2	1.2	1.2	123.81	1114	1114;818;804	8	3	7	3	21	6.3478e-12	NaN	NaN	NaN	0	NaN	NaN	NaN	0	NaN	NaN	NaN	0	NaN	NaN
E9PV45;B1AY13;B1AY13-2	E9PV45;B1AY13	37;37;5	37;37;5	37;37;5	Ubiquitin carboxyl-terminal hydrolase;Ubiquitin carboxyl-terminal hydrolase 24	Usp24	>tr|E9PV45|E9PV45_MOUSE Ubiquitin carboxyl-terminal hydrolase OS=Mus musculus GN=Usp24 PE=3 SV=1;>sp|B1AY13|UBP24_MOUSE Ubiquitin carboxyl-terminal hydrolase 24 OS=Mus musculus GN=Usp24 PE=1 SV=1	3	37	37	37	15	13	21	15	15	13	21	15	15	13	21	15	19.4	19.4	19.4	294.13	2618	2618;2617;418	40	33	50	35	158	4.524e-156	0.94666	0.97177	19.721	90	0.61818	0.89824	17.641	21	0.61989	0.85981	14.19	18	1.0753	1.0851
Q9DC11;B1AY85;B1AY86	Q9DC11;B1AY85;B1AY86	2;2;2	2;2;2	2;2;2	Plexin domain-containing protein 2	Plxdc2	>sp|Q9DC11|PXDC2_MOUSE Plexin domain-containing protein 2 OS=Mus musculus GN=Plxdc2 PE=1 SV=1;>tr|B1AY85|B1AY85_MOUSE Plexin domain containing 2 OS=Mus musculus GN=Plxdc2 PE=4 SV=1;>tr|B1AY86|B1AY86_MOUSE Plexin domain containing 2 OS=Mus musculus GN=Plxdc	3	2	2	2	1	2	0	0	1	2	0	0	1	2	0	0	3.2	3.2	3.2	59.616	530	530;528;479	1	6			7	3.5456e-05	NaN	NaN	NaN	0	NaN	NaN	NaN	0	NaN	NaN	NaN	0	NaN	NaN
B1AYB5;B1AYB6;B1AYB7;F6Q8U1	B1AYB5;B1AYB6;B1AYB7	6;6;4;1	6;6;4;1	6;6;4;1	Methyl-CpG-binding domain protein 5	Mbd5	>tr|B1AYB5|B1AYB5_MOUSE Methyl-CpG binding domain protein 5 OS=Mus musculus GN=Mbd5 PE=4 SV=1;>sp|B1AYB6|MBD5_MOUSE Methyl-CpG-binding domain protein 5 OS=Mus musculus GN=Mbd5 PE=2 SV=1;>tr|B1AYB7|B1AYB7_MOUSE Methyl-CpG binding domain protein 5 OS=Mus mus	4	6	6	6	2	3	0	2	2	3	0	2	2	3	0	2	5.8	5.8	5.8	183.59	1728	1728;1498;856;1067	2	4		4	10	4.8005e-11	0.83999	1.1816	50.914	4	0.6388	1.0141	15.219	2	1.5412	1.8942	60.339	2	NaN	NaN
Q9Z0T9;B1AYG6;B1AYG7	Q9Z0T9;B1AYG6;B1AYG7	1;1;1	1;1;1	1;1;1	Integrin beta-6;Integrin beta	Itgb6	>sp|Q9Z0T9|ITB6_MOUSE Integrin beta-6 OS=Mus musculus GN=Itgb6 PE=2 SV=1;>tr|B1AYG6|B1AYG6_MOUSE Integrin beta OS=Mus musculus GN=Itgb6 PE=3 SV=1;>tr|B1AYG7|B1AYG7_MOUSE Integrin beta (Fragment) OS=Mus musculus GN=Itgb6 PE=3 SV=1	3	1	1	1	1	1	1	1	1	1	1	1	1	1	1	1	1.1	1.1	1.1	86.041	787	787;764;755	4	4	6	4	18	2.1534e-06	0.74696	0.77197	48.283	18	1.3217	1.7541	15.178	4	1.3341	1.7927	7.9442	4	0.69054	0.68748
Q8C5N3;B1AYU7;Q8C5N3-2;B1AYU4;A2AK42;B1AYU8;J3QM48;J3QNR0;B1AYU9	Q8C5N3;B1AYU7;Q8C5N3-2;B1AYU4;A2AK42	10;10;10;8;7;2;1;1;1	10;10;10;8;7;2;1;1;1	10;10;10;8;7;2;1;1;1	Pre-mRNA-splicing factor CWC22 homolog	Cwc22;OTTMUSG00000013393	>sp|Q8C5N3|CWC22_MOUSE Pre-mRNA-splicing factor CWC22 homolog OS=Mus musculus GN=Cwc22 PE=1 SV=1;>tr|B1AYU7|B1AYU7_MOUSE Novel protein OS=Mus musculus GN=Cwc22 PE=4 SV=1;>sp|Q8C5N3-2|CWC22_MOUSE Isoform 2 of Pre-mRNA-splicing factor CWC22 homolog OS=Mus mu	9	10	10	10	4	5	7	10	4	5	7	10	4	5	7	10	12	12	12	104.77	908	908;903;902;723;830;139;243;243;109	24	33	25	38	120	5.2603e-112	1.4004	1.3757	41.83	16	0.42799	0.63689	17.834	2	0.5847	0.81513	21.098	3	1.6728	1.5683
Q3UMF0;B1AZ14;Q3UMF0-2;B1AZ15;Q3UMF0-4;Q3UMF0-3;B1AZ26	Q3UMF0;B1AZ14;Q3UMF0-2;B1AZ15;Q3UMF0-4;Q3UMF0-3	25;25;25;25;25;25;6	25;25;25;25;25;25;6	25;25;25;25;25;25;6	Cordon-bleu protein-like 1	Cobll1	>sp|Q3UMF0|COBL1_MOUSE Cordon-bleu protein-like 1 OS=Mus musculus GN=Cobll1 PE=1 SV=2;>tr|B1AZ14|B1AZ14_MOUSE Cobl-like 1 OS=Mus musculus GN=Cobll1 PE=4 SV=1;>sp|Q3UMF0-2|COBL1_MOUSE Isoform 2 of Cordon-bleu protein-like 1 OS=Mus musculus GN=Cobll1;>tr|B1A	7	25	25	25	11	14	22	11	11	14	22	11	11	14	22	11	26	26	26	137.38	1273	1273;1241;1241;1240;1203;1202;347	109	75	120	83	387	2.5519e-261	0.87645	0.90084	36.029	32	0.57839	0.74284	19.997	3	0.7297	0.92219	33.829	6	0.96944	0.90937
Q8BKX1;Q8BKX1-2;B1AZ46;Q8BKX1-3;Q8BKX1-4	Q8BKX1;Q8BKX1-2;B1AZ46;Q8BKX1-3;Q8BKX1-4	17;17;17;17;15	17;17;17;17;15	17;17;17;17;15	Brain-specific angiogenesis inhibitor 1-associated protein 2	Baiap2	>sp|Q8BKX1|BAIP2_MOUSE Brain-specific angiogenesis inhibitor 1-associated protein 2 OS=Mus musculus GN=Baiap2 PE=1 SV=2;>sp|Q8BKX1-2|BAIP2_MOUSE Isoform 2 of Brain-specific angiogenesis inhibitor 1-associated protein 2 OS=Mus musculus GN=Baiap2;>tr|B1AZ46|	5	17	17	17	5	3	15	7	5	3	15	7	5	3	15	7	38.7	38.7	38.7	59.236	535	535;522;521;513;482	17	7	30	14	68	3.5577e-100	0.98614	0.93458	25.741	33	0.77095	1.0957	18.389	5	1.2415	1.7894	NaN	1	0.99316	0.90206
B1AZI6;Q8C690;F6SBF2;F6RBN0;F6VK25;B8A4C2;F6W2C7;B1AZI7;F6QCT0	B1AZI6	23;4;2;2;2;2;2;1;1	23;4;2;2;2;2;2;1;1	11;4;2;1;2;2;2;0;0	THO complex subunit 2	Thoc2	>sp|B1AZI6|THOC2_MOUSE THO complex subunit 2 OS=Mus musculus GN=Thoc2 PE=3 SV=1	9	23	23	11	16	8	10	11	16	8	10	11	7	5	4	5	18.5	18.5	7.7	182.77	1594	1594;232;165;125;117;109;86;87;53	30	20	23	31	104	8.2294e-63	0.91053	1.0447	27.262	66	0.70222	0.93942	35.025	25	0.79634	0.90292	14.691	10	1.2168	1.178
B1AZP2;B7ZNS2;B1AZP2-3;B1AZP2-2;E9PUF2;F6YMR0;I1E4X0;H3BJW9;H3BJD4;H3BKJ0;H3BL90	B1AZP2;B7ZNS2;B1AZP2-3;B1AZP2-2;E9PUF2;F6YMR0;I1E4X0;H3BJW9	4;4;4;3;3;3;3;2;1;1;1	4;4;4;3;3;3;3;2;1;1;1	4;4;4;3;3;3;3;2;1;1;1	Disks large-associated protein 4	Dlgap4	>sp|B1AZP2|DLGP4_MOUSE Disks large-associated protein 4 OS=Mus musculus GN=Dlgap4 PE=1 SV=1;>tr|B7ZNS2|B7ZNS2_MOUSE Disks large-associated protein 4 OS=Mus musculus GN=Dlgap4 PE=2 SV=1;>sp|B1AZP2-3|DLGP4_MOUSE Isoform 3 of Disks large-associated protein 4	11	4	4	4	0	3	3	1	0	3	3	1	0	3	3	1	5.2	5.2	5.2	108.04	992	992;975;453;989;285;266;244;122;110;68;42		10	8	3	21	1.781e-37	1.8288	2.0467	7.9628	4	NaN	NaN	NaN	0	NaN	NaN	NaN	0	1.8288	2.0467
B1B0E8;Q62377;B1B0E9;B1B0F0;B1B0F1	B1B0E8;Q62377	4;2;1;1;1	4;2;1;1;1	4;2;1;1;1	U2 small nuclear ribonucleoprotein auxiliary factor 35 kDa subunit-related protein 2	Zrsr2	>tr|B1B0E8|B1B0E8_MOUSE U2 small nuclear ribonucleoprotein auxiliary factor 35 kDa subunit-related protein 2 OS=Mus musculus GN=Zrsr2 PE=4 SV=1;>sp|Q62377|U2AFM_MOUSE U2 small nuclear ribonucleoprotein auxiliary factor 35 kDa subunit-related protein 2 OS=M	5	4	4	4	1	3	2	3	1	3	2	3	1	3	2	3	7	7	7	64.448	541	541;462;144;113;71	3	10	9	10	32	7.8257e-15	0.67553	0.97241	NaN	1	NaN	NaN	NaN	0	0.67553	0.97241	NaN	1	NaN	NaN
B1B1A8;Q6PDN3;Q6PDN3-3;Q6PDN3-2	B1B1A8;Q6PDN3;Q6PDN3-3;Q6PDN3-2	2;2;1;1	2;2;1;1	2;2;1;1	Myosin light chain kinase, smooth muscle;Myosin light chain kinase, smooth muscle, deglutamylated form	Mylk	>tr|B1B1A8|B1B1A8_MOUSE Myosin light chain kinase, smooth muscle OS=Mus musculus GN=Mylk PE=2 SV=1;>sp|Q6PDN3|MYLK_MOUSE Myosin light chain kinase, smooth muscle OS=Mus musculus GN=Mylk PE=1 SV=3;>sp|Q6PDN3-3|MYLK_MOUSE Isoform 3 of Myosin light chain kina	4	2	2	2	1	1	1	2	1	1	1	2	1	1	1	2	0.9	0.9	0.9	213.61	1950	1950;1941;1031;687	4	1	3	3	11	3.2903e-05	0.87398	1.0015	32.652	10	0.65316	0.82925	45.988	4	0.63415	0.78678	NaN	1	1.115	1.2019
G5E8P7;Q2M3X8-3;Q2M3X8;Q2M3X8-2;B1B1B8	G5E8P7;Q2M3X8-3;Q2M3X8;Q2M3X8-2;B1B1B8	3;3;3;3;3	2;2;2;2;2	2;2;2;2;2	Phosphatase and actin regulator 1	Phactr1	>tr|G5E8P7|G5E8P7_MOUSE Phosphatase and actin regulator 1 OS=Mus musculus GN=Phactr1 PE=1 SV=1;>sp|Q2M3X8-3|PHAR1_MOUSE Isoform 3 of Phosphatase and actin regulator 1 OS=Mus musculus GN=Phactr1;>sp|Q2M3X8|PHAR1_MOUSE Phosphatase and actin regulator 1 OS=Mu	5	3	2	2	1	2	1	1	0	2	0	0	0	2	0	0	5.4	3.2	3.2	73.57	649	649;642;580;573;557		3			3	7.1256e-08	1.9297	2.829	1.3937	2	NaN	NaN	NaN	0	1.9297	2.829	1.3937	2	NaN	NaN
Q9D773;B1B1D8;B1B1D7	Q9D773;B1B1D8	5;5;2	5;5;2	5;5;2	39S ribosomal protein L2, mitochondrial	Mrpl2	>sp|Q9D773|RM02_MOUSE 39S ribosomal protein L2, mitochondrial OS=Mus musculus GN=Mrpl2 PE=2 SV=1;>tr|B1B1D8|B1B1D8_MOUSE 39S ribosomal protein L2, mitochondrial OS=Mus musculus GN=Mrpl2 PE=4 SV=1	3	5	5	5	3	0	3	1	3	0	3	1	3	0	3	1	24.5	24.5	24.5	33.34	306	306;304;247	6		6	1	13	2.4687e-83	0.76881	0.78328	42.328	13	0.8257	1.3349	15.354	6	NaN	NaN	NaN	0	0.7205	0.65247
E9PVU7;F6QFD1;Q01063;B2KF84;B2KF57;B1PSD9;Q01063-2;B1AWC9;Q8VBU5;B1AWC8;Q01063-3;A6XDB0;A6XDB1;Q80VK8;F6YIS2;G3UWT3	E9PVU7;F6QFD1;Q01063;B2KF84;B2KF57;B1PSD9;Q01063-2;B1AWC9;Q8VBU5;B1AWC8;Q01063-3;A6XDB0;A6XDB1;Q80VK8;F6YIS2;G3UWT3	2;2;2;2;2;2;2;1;1;1;1;1;1;1;1;1	2;2;2;2;2;2;2;1;1;1;1;1;1;1;1;1	1;1;1;1;1;1;1;0;0;0;1;1;1;0;1;0	cAMP-specific 3,5-cyclic phosphodiesterase 4D	Pde4d;Pde4b	>tr|E9PVU7|E9PVU7_MOUSE cAMP-specific 3,5-cyclic phosphodiesterase 4D OS=Mus musculus GN=Pde4d PE=3 SV=1;>tr|F6QFD1|F6QFD1_MOUSE cAMP-specific 3,5-cyclic phosphodiesterase 4D (Fragment) OS=Mus musculus GN=Pde4d PE=3 SV=1;>sp|Q01063|PDE4D_MOUSE cAMP-spe	16	2	2	1	2	1	1	1	2	1	1	1	1	0	0	0	3	3	1.7	90.758	803	803;754;747;703;700;698;678;736;721;659;584;517;504;212;207;166	4	4	2	4	14	3.1419e-07	0.38276	0.57693	NaN	1	0.38276	0.57693	NaN	1	NaN	NaN	NaN	0	NaN	NaN
B2KF50	B2KF50	4	4	4		Uhrf1bp1	>tr|B2KF50|B2KF50_MOUSE Protein Uhrf1bp1 OS=Mus musculus GN=Uhrf1bp1 PE=4 SV=1	1	4	4	4	1	1	3	3	1	1	3	3	1	1	3	3	3.9	3.9	3.9	157.01	1429	1429	4	3	9	13	29	9.677e-82	1.1617	1.132	45.606	2	NaN	NaN	NaN	0	NaN	NaN	NaN	0	0.79944	0.81995
B2KF52;Q3TT38	B2KF52;Q3TT38	2;2	2;2	2;2	Uncharacterized protein C6orf106 homolog	D17Wsu92e	>tr|B2KF52|B2KF52_MOUSE Novel protein OS=Mus musculus GN=D17Wsu92e PE=4 SV=1;>sp|Q3TT38|CF106_MOUSE Uncharacterized protein C6orf106 homolog OS=Mus musculus GN=D17Wsu92e PE=2 SV=2	2	2	2	2	2	2	2	2	2	2	2	2	2	2	2	2	4.7	4.7	4.7	32.179	295	295;291	40	27	34	20	121	7.8287e-95	NaN	NaN	NaN	0	NaN	NaN	NaN	0	NaN	NaN	NaN	0	NaN	NaN
Q505B7;B2KGA7;Q505B7-2;A8Y5E9;F7BCB7	Q505B7;B2KGA7;Q505B7-2;A8Y5E9	5;5;5;3;1	5;5;5;3;1	5;5;5;3;1	Protein archease	Zbtb8os	>sp|Q505B7|ARCH_MOUSE Protein archease OS=Mus musculus GN=Zbtb8os PE=2 SV=2;>tr|B2KGA7|B2KGA7_MOUSE Protein archease OS=Mus musculus GN=Zbtb8os PE=4 SV=1;>sp|Q505B7-2|ARCH_MOUSE Isoform 2 of Protein archease OS=Mus musculus GN=Zbtb8os;>tr|A8Y5E9|A8Y5E9_MOU	5	5	5	5	2	1	3	3	2	1	3	3	2	1	3	3	27.4	27.4	27.4	19.727	168	168;167;146;136;54	4	2	5	7	18	3.3747e-19	0.94863	0.9238	14.216	18	0.69087	0.97573	9.1799	4	0.64313	0.86135	8.8268	2	0.96091	0.92235
B2KGF0;Q8VEE0	B2KGF0;Q8VEE0	2;2	2;2	2;2	Ribulose-phosphate 3-epimerase	Rpe	>tr|B2KGF0|B2KGF0_MOUSE Ribulose-phosphate 3-epimerase OS=Mus musculus GN=Rpe PE=3 SV=1;>sp|Q8VEE0|RPE_MOUSE Ribulose-phosphate 3-epimerase OS=Mus musculus GN=Rpe PE=2 SV=1	2	2	2	2	2	1	2	2	2	1	2	2	2	1	2	2	11.9	11.9	11.9	25.647	235	235;228	6	2	6	5	19	2.4102e-98	1.0321	0.98547	27.093	18	0.52183	0.76487	4.4418	5	0.45042	0.64954	6.9914	2	1.1171	1.0675
B2M1R6;P61979-3;H3BKD0;D3Z5X4;H3BKI8;H3BJS9	B2M1R6;P61979-3;H3BKD0;D3Z5X4	28;28;20;18;12;5	1;1;1;1;1;1	1;1;1;1;1;1		Hnrnpk;Gm7964	>tr|B2M1R6|B2M1R6_MOUSE Heterogeneous nuclear ribonucleoprotein K OS=Mus musculus GN=Hnrnpk PE=2 SV=1;>sp|P61979-3|HNRPK_MOUSE Isoform 3 of Heterogeneous nuclear ribonucleoprotein K OS=Mus musculus GN=Hnrnpk;>tr|H3BKD0|H3BKD0_MOUSE Heterogeneous nuclear ri	6	28	1	1	25	23	21	23	0	0	0	1	0	0	0	1	64.5	2.7	2.7	48.562	440	440;439;299;439;178;87				2	2	0	0.82567	0.7442	10.611	2	NaN	NaN	NaN	0	NaN	NaN	NaN	0	NaN	NaN
B2RPZ5;Q8CDU6;D6REW0	B2RPZ5;Q8CDU6;D6REW0	1;1;1	1;1;1	1;1;1	Probable E3 ubiquitin-protein ligase HECTD2	Hectd2	>tr|B2RPZ5|B2RPZ5_MOUSE Hectd2 protein OS=Mus musculus GN=Hectd2 PE=2 SV=1;>sp|Q8CDU6|HECD2_MOUSE Probable E3 ubiquitin-protein ligase HECTD2 OS=Mus musculus GN=Hectd2 PE=2 SV=2;>tr|D6REW0|D6REW0_MOUSE Probable E3 ubiquitin-protein ligase HECTD2 OS=Mus mus	3	1	1	1	1	1	1	1	1	1	1	1	1	1	1	1	2.3	2.3	2.3	87.859	775	775;774;90	4	1	1	1	7	6.0075e-09	NaN	NaN	NaN	0	NaN	NaN	NaN	0	NaN	NaN	NaN	0	NaN	NaN
G5E8D8;Q2VPU4;B2RQ56;Q2VPU4-2	G5E8D8;Q2VPU4;B2RQ56;Q2VPU4-2	1;1;1;1	1;1;1;1	1;1;1;1	MLX-interacting protein	Mlxip	>tr|G5E8D8|G5E8D8_MOUSE MLX interacting protein, isoform CRA_a OS=Mus musculus GN=Mlxip PE=4 SV=1;>sp|Q2VPU4|MLXIP_MOUSE MLX-interacting protein OS=Mus musculus GN=Mlxip PE=1 SV=1;>tr|B2RQ56|B2RQ56_MOUSE MLX interacting protein OS=Mus musculus GN=Mlxip PE=	4	1	1	1	1	1	1	1	1	1	1	1	1	1	1	1	1.1	1.1	1.1	100.77	917	917;917;614;614	11	6	3	3	23	0.0012911	NaN	NaN	NaN	0	NaN	NaN	NaN	0	NaN	NaN	NaN	0	NaN	NaN
F8VQH0;Q4JIM5;B2RQ57;P00520;P00520-3;P00520-2	F8VQH0;Q4JIM5;B2RQ57	5;5;5;1;1;1	5;5;5;1;1;1	4;4;4;0;0;0	Abelson tyrosine-protein kinase 2	Abl2	>tr|F8VQH0|F8VQH0_MOUSE Abelson tyrosine-protein kinase 2 OS=Mus musculus GN=Abl2 PE=4 SV=1;>sp|Q4JIM5|ABL2_MOUSE Abelson tyrosine-protein kinase 2 OS=Mus musculus GN=Abl2 PE=1 SV=1;>tr|B2RQ57|B2RQ57_MOUSE Abelson tyrosine-protein kinase 2 OS=Mus musculus	6	5	5	4	4	3	3	4	4	3	3	4	4	3	3	3	4.5	4.5	3.8	128.22	1182	1182;1182;1078;1123;1118;1117	42	30	34	34	140	2.8411e-66	NaN	NaN	NaN	0	NaN	NaN	NaN	0	NaN	NaN	NaN	0	NaN	NaN
E9PWR4;B2RQ71;B7ZMZ7	E9PWR4;B2RQ71;B7ZMZ7	6;6;6	5;5;5	4;4;4		Dip2c	>tr|E9PWR4|E9PWR4_MOUSE Protein Dip2c OS=Mus musculus GN=Dip2c PE=4 SV=1;>tr|B2RQ71|B2RQ71_MOUSE Dip2c protein OS=Mus musculus GN=Dip2c PE=2 SV=1;>tr|B7ZMZ7|B7ZMZ7_MOUSE Dip2c protein OS=Mus musculus GN=Dip2c PE=2 SV=1	3	6	5	4	3	1	4	3	3	1	3	3	3	1	3	2	5.3	3.6	3	171.07	1557	1557;1556;1527	7	2	7	4	20	2.5653e-12	2.0669	1.952	NaN	1	NaN	NaN	NaN	0	NaN	NaN	NaN	0	NaN	NaN
B2RQC2	B2RQC2	3	3	3	Ubiquitin carboxyl-terminal hydrolase 42	Usp42	>sp|B2RQC2|UBP42_MOUSE Ubiquitin carboxyl-terminal hydrolase 42 OS=Mus musculus GN=Usp42 PE=2 SV=1	1	3	3	3	3	3	2	3	3	3	2	3	3	3	2	3	3.4	3.4	3.4	146.22	1324	1324	11	5	7	13	36	2.4081e-13	NaN	NaN	NaN	0	NaN	NaN	NaN	0	NaN	NaN	NaN	0	NaN	NaN
B2RQC6;E9QAI5;G3UWN2;B7ZN27;E9QAT6;Q8C196	B2RQC6;E9QAI5;G3UWN2;B7ZN27	109;109;104;104;47;2	109;109;104;104;47;2	102;102;97;97;47;2		Cad	>tr|B2RQC6|B2RQC6_MOUSE Carbamoyl-phosphate synthetase 2, aspartate transcarbamylase, and dihydroorotase OS=Mus musculus GN=Cad PE=2 SV=1;>tr|E9QAI5|E9QAI5_MOUSE Protein Cad OS=Mus musculus GN=Cad PE=3 SV=1;>tr|G3UWN2|G3UWN2_MOUSE Protein Cad OS=Mus muscul	6	109	109	102	81	83	95	90	81	83	95	90	76	77	89	85	66	66	62	243.24	2225	2225;2162;2164;2154;971;1500	301	328	360	277	1266	0	0.89092	1.0044	57.498	929	0.44273	0.5445	28.7	200	0.46988	0.55808	26.741	249	1.381	1.3246
B2RQE8	B2RQE8	2	2	2	Rho GTPase-activating protein 42	Arhgap42	>sp|B2RQE8|RHG42_MOUSE Rho GTPase-activating protein 42 OS=Mus musculus GN=Arhgap42 PE=2 SV=1	1	2	2	2	1	2	0	0	1	2	0	0	1	2	0	0	3.6	3.6	3.6	94.635	841	841	1	3			4	0.0001189	NaN	NaN	NaN	0	NaN	NaN	NaN	0	NaN	NaN	NaN	0	NaN	NaN
B2RQG2	B2RQG2	4	4	4		Phf3	>tr|B2RQG2|B2RQG2_MOUSE PHD finger protein 3 OS=Mus musculus GN=Phf3 PE=2 SV=1	1	4	4	4	3	2	4	2	3	2	4	2	3	2	4	2	1.9	1.9	1.9	225.54	2025	2025	18	14	14	14	60	1.3384e-244	1.1251	1.0246	NaN	1	NaN	NaN	NaN	0	NaN	NaN	NaN	0	1.1251	1.0246
B2RQS1;Q9ERG2	B2RQS1;Q9ERG2	15;14	15;14	14;13	Striatin-3	Strn3	>tr|B2RQS1|B2RQS1_MOUSE Striatin-3 OS=Mus musculus GN=Strn3 PE=2 SV=1;>sp|Q9ERG2|STRN3_MOUSE Striatin-3 OS=Mus musculus GN=Strn3 PE=1 SV=1	2	15	15	14	11	3	12	10	11	3	12	10	10	2	11	9	25.8	25.8	24.4	77.731	712	712;796	38	22	47	35	142	4.3264e-300	1.3212	1.2587	58.183	49	0.5726	0.81192	20.861	18	0.76856	1.0004	NaN	1	1.4544	1.424
B2RR83	B2RR83	5	5	5	Probable ATP-dependent RNA helicase YTHDC2	Ythdc2	>sp|B2RR83|YTDC2_MOUSE Probable ATP-dependent RNA helicase YTHDC2 OS=Mus musculus GN=Ythdc2 PE=2 SV=1	1	5	5	5	1	2	3	1	1	2	3	1	1	2	3	1	4.5	4.5	4.5	161.09	1445	1445	1	5	4	2	12	1.736e-10	0.94632	0.96181	16.63	3	NaN	NaN	NaN	0	0.61941	0.89215	NaN	1	1.1162	1.0861
B2RRE7;G3UXM1;G3UXQ0	B2RRE7	8;2;1	8;2;1	8;2;1	OTU domain-containing protein 4	Otud4	>sp|B2RRE7|OTUD4_MOUSE OTU domain-containing protein 4 OS=Mus musculus GN=Otud4 PE=1 SV=1	3	8	8	8	5	6	3	4	5	6	3	4	5	6	3	4	8.4	8.4	8.4	123.05	1107	1107;204;211	9	8	7	6	30	1.8776e-35	0.43262	0.58459	59.795	15	0.34877	0.48758	13.993	5	0.43158	0.55842	26.877	5	1.6806	1.6221
B2RRI2;Q689Z5-2;Q689Z5;Q7TNB8;Q7TNB8-2;Q7TNB8-3	B2RRI2;Q689Z5-2;Q689Z5	10;10;10;2;2;2	10;10;10;2;2;2	10;10;10;2;2;2	Protein strawberry notch homolog 1	Sbno1	>tr|B2RRI2|B2RRI2_MOUSE Protein strawberry notch homolog 1 OS=Mus musculus GN=Sbno1 PE=2 SV=1;>sp|Q689Z5-2|SBNO1_MOUSE Isoform 2 of Protein strawberry notch homolog 1 OS=Mus musculus GN=Sbno1;>sp|Q689Z5|SBNO1_MOUSE Protein strawberry notch homolog 1 OS=Mus	6	10	10	10	2	5	9	2	2	5	9	2	2	5	9	2	13.4	13.4	13.4	153.92	1391	1391;1391;1390;1349;1348;655	3	8	16	2	29	6.6073e-62	1.5354	1.5025	55.697	26	0.62421	0.91985	5.5909	3	0.43058	0.54831	18.386	8	1.9178	1.8073
B2RS91	B2RS91	1	1	1	RNA polymerase I-specific transcription initiation factor RRN3	Rrn3	>sp|B2RS91|RRN3_MOUSE RNA polymerase I-specific transcription initiation factor RRN3 OS=Mus musculus GN=Rrn3 PE=1 SV=1	1	1	1	1	0	0	1	0	0	0	1	0	0	0	1	0	1.7	1.7	1.7	74.517	656	656			2		2	0.00055933	0.91278	0.89169	5.843	2	NaN	NaN	NaN	0	NaN	NaN	NaN	0	0.91278	0.89169
Q6AW69;B2RSU6;Q6AW69-4;Q6AW69-5;D3Z3H4;Q6AW69-3	Q6AW69;B2RSU6;Q6AW69-4;Q6AW69-5;D3Z3H4;Q6AW69-3	23;23;23;23;21;21	23;23;23;23;21;21	23;23;23;23;21;21	Cingulin-like protein 1	Cgnl1	>sp|Q6AW69|CGNL1_MOUSE Cingulin-like protein 1 OS=Mus musculus GN=Cgnl1 PE=1 SV=2;>tr|B2RSU6|B2RSU6_MOUSE Cingulin-like 1 OS=Mus musculus GN=Cgnl1 PE=2 SV=1;>sp|Q6AW69-4|CGNL1_MOUSE Isoform 4 of Cingulin-like protein 1 OS=Mus musculus GN=Cgnl1;>sp|Q6AW69-5	6	23	23	23	11	15	17	15	11	15	17	15	11	15	17	15	19.7	19.7	19.7	148.23	1298	1298;1297;1297;1294;1226;1226	46	56	48	59	209	8.7587e-301	0.94217	0.95294	36.861	33	1.0606	1.4802	46.896	3	0.79815	1.0041	32.325	8	0.90403	0.89824
B2RT41	B2RT41	8	8	8		Zfc3h1	>tr|B2RT41|B2RT41_MOUSE Protein Zfc3h1 OS=Mus musculus GN=Zfc3h1 PE=2 SV=1	1	8	8	8	4	6	5	6	4	6	5	6	4	6	5	6	4.7	4.7	4.7	225.05	1992	1992	17	23	21	25	86	3.6426e-42	0.90309	0.85717	22.964	6	NaN	NaN	NaN	0	0.53982	0.80497	8.353	2	0.95552	0.85417
Q61315;B2RUG9;Q61315-2;E9QLQ9;Q61315-3;Q61315-4	Q61315;B2RUG9;Q61315-2;E9QLQ9;Q61315-3;Q61315-4	7;7;7;7;7;7	7;7;7;7;7;7	7;7;7;7;7;7	Adenomatous polyposis coli protein	Apc	>sp|Q61315|APC_MOUSE Adenomatous polyposis coli protein OS=Mus musculus GN=Apc PE=1 SV=1;>tr|B2RUG9|B2RUG9_MOUSE Adenomatosis polyposis coli OS=Mus musculus GN=Apc PE=2 SV=1;>sp|Q61315-2|APC_MOUSE Isoform 2 of Adenomatous polyposis coli protein OS=Mus musc	6	7	7	7	4	1	3	3	4	1	3	3	4	1	3	3	3.6	3.6	3.6	311.09	2845	2845;2842;2811;2808;2744;2710	4	1	4	6	15	7.542e-23	0.98987	1.0028	7.9876	4	0.82668	1.0362	NaN	1	NaN	NaN	NaN	0	NaN	NaN
B2RUJ8	B2RUJ8	5	1	1		Arhgap12	>tr|B2RUJ8|B2RUJ8_MOUSE Rho GTPase activating protein 12 OS=Mus musculus GN=Arhgap12 PE=2 SV=1	1	5	1	1	2	4	2	2	0	1	0	0	0	1	0	0	7.7	2.1	2.1	92.659	813	813		1			1	3.8328e-14	NaN	NaN	NaN	0	NaN	NaN	NaN	0	NaN	NaN	NaN	0	NaN	NaN
B2RUR4	B2RUR4	2	2	2	Keratinocyte proline-rich protein	Kprp	>sp|B2RUR4|KPRP_MOUSE Keratinocyte proline-rich protein OS=Mus musculus GN=Kprp PE=1 SV=1	1	2	2	2	0	0	2	0	0	0	2	0	0	0	2	0	4.4	4.4	4.4	71.739	657	657			3		3	1.0867e-06	NaN	NaN	NaN	0	NaN	NaN	NaN	0	NaN	NaN	NaN	0	NaN	NaN
B2RUR8;D3Z210	B2RUR8	3;1	3;1	3;1		Otud7b	>tr|B2RUR8|B2RUR8_MOUSE OTU domain containing 7B OS=Mus musculus GN=Otud7b PE=2 SV=1	2	3	3	3	1	1	1	1	1	1	1	1	1	1	1	1	6	6	6	91.982	840	840;196	2	1	2	1	6	9.6998e-09	0.39207	0.50908	72.024	4	0.25874	0.34528	15.566	2	0.52677	0.67234	NaN	1	NaN	NaN
B2RVL6	B2RVL6	4	4	4	Zinc finger CCHC domain-containing protein 24	Zcchc24	>sp|B2RVL6|ZCH24_MOUSE Zinc finger CCHC domain-containing protein 24 OS=Mus musculus GN=Zcchc24 PE=2 SV=1	1	4	4	4	2	1	2	0	2	1	2	0	2	1	2	0	34	34	34	26.96	241	241	3	2	3		8	1.1031e-17	0.64791	0.80254	30.483	8	0.57328	0.80616	7.1102	3	0.8503	1.2466	4.4897	2	0.65751	0.59529
B2RW11	B2RW11	6	6	6		Ankrd34a	>tr|B2RW11|B2RW11_MOUSE Ankyrin repeat domain 34A OS=Mus musculus GN=Ankrd34a PE=2 SV=1	1	6	6	6	2	5	1	2	2	5	1	2	2	5	1	2	16	16	16	52.45	495	495	18	11	4	7	40	7.5695e-53	NaN	NaN	NaN	0	NaN	NaN	NaN	0	NaN	NaN	NaN	0	NaN	NaN
B2RWS6;E9PYJ8	B2RWS6;E9PYJ8	12;12	12;12	5;5	Histone acetyltransferase p300	Ep300	>sp|B2RWS6|EP300_MOUSE Histone acetyltransferase p300 OS=Mus musculus GN=Ep300 PE=1 SV=1;>tr|E9PYJ8|E9PYJ8_MOUSE Histone acetyltransferase p300 OS=Mus musculus GN=Ep300 PE=4 SV=1	2	12	12	5	5	4	8	5	5	4	8	5	3	2	3	0	6.9	6.9	3.2	263.76	2415	2415;2412	14	13	23	7	57	1.7752e-101	1.4236	1.4343	43.871	18	0.42076	0.57102	10.277	2	0.43607	0.56664	NaN	1	1.4077	1.4075
B2RXC1;B2RXC1-2	B2RXC1	17;1	17;1	17;1	Trafficking protein particle complex subunit 11	Trappc11	>sp|B2RXC1|TPC11_MOUSE Trafficking protein particle complex subunit 11 OS=Mus musculus GN=Trappc11 PE=2 SV=1	2	17	17	17	7	7	10	9	7	7	10	9	7	7	10	9	24	24	24	128.39	1133	1133;176	9	12	13	13	47	2.3652e-45	0.85448	0.98012	23.186	46	0.84407	1.1803	22.014	9	0.81805	1.0735	14.486	12	0.85636	0.82712
B2RXC2	B2RXC2	5	5	5		Itpkb	>tr|B2RXC2|B2RXC2_MOUSE Inositol 1,4,5-trisphosphate 3-kinase B OS=Mus musculus GN=Itpkb PE=2 SV=1	1	5	5	5	4	4	3	3	4	4	3	3	4	4	3	3	5.9	5.9	5.9	102.67	942	942	16	8	9	5	38	1.7725e-22	NaN	NaN	NaN	0	NaN	NaN	NaN	0	NaN	NaN	NaN	0	NaN	NaN
B2RXC6	B2RXC6	7	6	6	DNA-directed RNA polymerase	Polr3a	>tr|B2RXC6|B2RXC6_MOUSE DNA-directed RNA polymerase OS=Mus musculus GN=Polr3a PE=2 SV=1	1	7	6	6	2	3	4	2	2	3	4	1	2	3	4	1	7.8	7.1	7.1	155.74	1390	1390	3	4	7	2	16	4.6272e-18	0.839	0.93616	13.673	16	0.63493	0.88349	9.6572	3	0.69271	0.85096	12.517	4	1.079	1.03
B2RXE2	B2RXE2	1	1	1	Sodium/hydrogen exchanger	Slc9a5	>tr|B2RXE2|B2RXE2_MOUSE Sodium/hydrogen exchanger OS=Mus musculus GN=Slc9a5 PE=2 SV=1	1	1	1	1	0	1	1	1	0	1	1	1	0	1	1	1	1.4	1.4	1.4	99.007	898	898		3	2	6	11	0.0011749	NaN	NaN	NaN	0	NaN	NaN	NaN	0	NaN	NaN	NaN	0	NaN	NaN
B2RXS4;Q3UH93;Q9QZC2	B2RXS4	41;1;1	41;1;1	41;1;1	Plexin-B2	Plxnb2	>sp|B2RXS4|PLXB2_MOUSE Plexin-B2 OS=Mus musculus GN=Plxnb2 PE=1 SV=1	3	41	41	41	31	26	32	25	31	26	32	25	31	26	32	25	30.6	30.6	30.6	206.23	1842	1842;1925;1574	55	63	73	52	243	1.9746e-250	0.90013	1.0242	39.183	235	1.0731	1.571	17.45	52	1.1098	1.4705	18.975	61	0.73305	0.72242
B2RXW8	B2RXW8	17	17	14		Ppfia1	>tr|B2RXW8|B2RXW8_MOUSE Ppfia1 protein OS=Mus musculus GN=Ppfia1 PE=2 SV=1	1	17	17	14	10	10	12	9	10	10	12	9	9	9	10	7	16.1	16.1	13.3	140.13	1241	1241	54	42	42	46	184	5.7949e-118	0.74618	0.73526	52.715	22	1.0904	1.6215	14.193	7	1.1093	1.4525	9.4009	3	0.54097	0.51026
B2RXX4;Q6ZPE2;D6RG52;F7AWK3	B2RXX4;Q6ZPE2	11;11;5;3	11;11;5;3	11;11;5;3	Myotubularin-related protein 5	Sbf1	>tr|B2RXX4|B2RXX4_MOUSE Myotubularin-related protein 5 OS=Mus musculus GN=Sbf1 PE=2 SV=1;>sp|Q6ZPE2|MTMR5_MOUSE Myotubularin-related protein 5 OS=Mus musculus GN=Sbf1 PE=1 SV=2	4	11	11	11	3	6	11	5	3	6	11	5	3	6	11	5	8.7	8.7	8.7	211.43	1893	1893;1867;403;258	16	22	23	25	86	4.488e-34	0.82708	0.80692	26.199	34	0.97591	1.2884	12.078	3	0.92169	1.1088	11.732	8	0.7577	0.74713
B2RY04	B2RY04	20	19	19	Dedicator of cytokinesis protein 5	Dock5	>sp|B2RY04|DOCK5_MOUSE Dedicator of cytokinesis protein 5 OS=Mus musculus GN=Dock5 PE=1 SV=2	1	20	19	19	7	9	18	7	6	8	17	6	6	8	17	6	15.1	14.6	14.6	214.43	1868	1868	27	25	26	18	96	4.4336e-78	1.0781	1.0729	45.573	30	0.63065	0.8241	30.06	7	0.50541	0.6209	6.2097	4	1.3796	1.3202
B2RY56-2;B2RY56;B2RY56-3	B2RY56-2;B2RY56	24;23;8	24;23;8	24;23;8	RNA-binding protein 25	Rbm25	>sp|B2RY56-2|RBM25_MOUSE Isoform 2 of RNA-binding protein 25 OS=Mus musculus GN=Rbm25;>sp|B2RY56|RBM25_MOUSE RNA-binding protein 25 OS=Mus musculus GN=Rbm25 PE=1 SV=1	3	24	24	24	13	14	13	12	13	14	13	12	13	14	13	12	38.3	38.3	38.3	99.551	838	838;841;299	34	28	32	28	122	9.1311e-216	0.82686	0.97172	52.643	76	0.38738	0.56861	33.614	23	0.45917	0.61532	20.468	17	1.7789	1.6966
B5B2N2;B5B2N7;Q6P7T9;O88942;O88942-2;Q9DBQ6;O88942-3	B5B2N2;B5B2N7;Q6P7T9;O88942;O88942-2;Q9DBQ6;O88942-3	3;3;3;3;3;3;3	3;3;3;3;3;3;3	3;3;3;3;3;3;3	Nuclear factor of activated T-cells, cytoplasmic 1	Nfatc1	>tr|B5B2N2|B5B2N2_MOUSE Nuclear factor of activated T-cells c1 isoform IA-IXL OS=Mus musculus GN=Nfatc1 PE=2 SV=1;>tr|B5B2N7|B5B2N7_MOUSE Nuclear factor of activated T-cells c1 isoform IB-IXL OS=Mus musculus GN=Nfatc1 PE=2 SV=1;>tr|Q6P7T9|Q6P7T9_MOUSE Nucl	7	3	3	3	3	1	1	2	3	1	1	2	3	1	1	2	4.6	4.6	4.6	101.61	939	939;925;827;717;703;703;681	5	4	1	3	13	1.1312e-08	NaN	NaN	NaN	0	NaN	NaN	NaN	0	NaN	NaN	NaN	0	NaN	NaN
Q8BTM8;B7FAU9;B7FAV1;F6XC15;J3JS91;F6Z2C0;Q8BTM8-2;F7AVL7	Q8BTM8;B7FAU9;B7FAV1	181;181;178;42;20;18;18;6	181;181;178;42;20;18;18;6	167;167;164;32;18;18;12;6	Filamin-A	Flna	>sp|Q8BTM8|FLNA_MOUSE Filamin-A OS=Mus musculus GN=Flna PE=1 SV=5;>tr|B7FAU9|B7FAU9_MOUSE Filamin, alpha OS=Mus musculus GN=Flna PE=4 SV=1;>tr|B7FAV1|B7FAV1_MOUSE Filamin, alpha (Fragment) OS=Mus musculus GN=Flna PE=4 SV=1	8	181	181	167	146	161	163	165	146	161	163	165	133	148	150	151	76.6	76.6	74.3	281.22	2647	2647;2639;2583;511;277;281;249;74	1215	1348	1592	1480	5635	0	0.80738	0.95171	73.147	4423	1.0789	1.5703	55.963	890	1.0592	1.5033	42.777	1059	0.69435	0.74323
211;598212;598213;598214;598215;598216;598217;598218;598219;598220;598221;598222;598223;598224;598225;598226;598227;598228;598229;598230;598231;598232;598233;598234;600686;600687;600688;600689;600690;600691;600692;600693;600694;600695;600696;600697;600698;600699;600700;600701;600702;600703;600704;600705;600706;600707;600708;600709;600710;600711;600712;600713;600714;600715;600716;600717;600718;600…	44321;44322;44323;44324;44325;44326;44327;44328;44329;44330;44331;44332;44333;44334;44335;44336;44337;44338;44339;44340;44341;44342;44343;44344;44345;44346;44347;44348;44349;44350;44351;44352;44353;44354;44355;44356;44357;44358;44359;44360;44361;44362;44363;44364;44365;44366;44367;44368;44369;44370;44371;44372;44373;44374;44375;44376;44377;44378;44379;44380;44381;44382;44383;44384;44385;44386;443…
46;217747;217748;217749;217750;217751;217752;217753;217754;217755;217756;217757;217758;217759;217760;217761;217762;217763;217764;217765;217766;217767;217768;217769;217770;217771;217772;217773;217774;217775;217776;217777;217778;217779;217780;217781;217782;217783;217784;217785;217786;217787;217788;217789;217790;217791;217792;217793;217794;217795;217796;217797;217798;217799;217800;217801;217802;2178…
18;821119;821120;821121;821122;821123;821124;821125;821126;821127;825257;825258;825259;825260;825261;825262;825263;825264;825265;825266;825267;825268;825269;825270;825271;825272;825273;825274;825275;825276;825277;825278;825279;825280;825281;825282;825283;865889;865890;865891;865892;865893;865894;865895;865896;865897;907236;907237;907238;907239;907240;907241;907242;907243;907244;907245;907246;9072…
779;1547780;1547781;1547782;1547783;1547784;1547785;1547786;1547787;1547788;1547789;1547790;1547791;1547792;1547793;1547794;1547795;1547796;1547797;1547798;1547799;1547800;1547801;1547802;1547803;1547804;1547805;1547806;1547807;1547808;1547809;1547810;1547811;1547812;1547813;1547814;1547815;1547816;1547817;1547818;1547819;1547820;1547821;1547822;1547823;1547824;1547825;1547826;1547827;1547828;154…
213;1763214;1763215;1763216;1763217;1763218;1763219;1763220;1763221;1763222;1763223;1763224;1763225;1763226;1763227;1763228;1763229;1763230;1763231;1763232;1763233;1763234;1763235;1763236;1763237;1763238;1763239;1763240;1763241;1763242;1763243;1763244;1763245;1763246;1763247;1763248;1763249;1763250;1763251;1763252;1763253;1763254;1763255;1763256;1763257;1763258;1763259;1763260;1763261;1763262;176…	44358;45349;46292;46337;46453;52142;54457;65504;68214;71586;74177;78522;85972;95937;108127;116545;129552;140883;148760;199180;200618;203106;203150;207654;217131;217244;219302;223074;223089;223102;223907;223987;224043;225044;249983;250151;250156;261537;264589;264641;289101;298219;315907;331915;331974;331991;334939;335736;337619;346982;348574;360786;390137;409014;423366;440062;466260;467051;488395;…	332;333;334;335;336;337;338;339;340;341;342;343;344;345;346;347;348;349	667;668;669;670;671;672;673;674;675;676;677;678;679;6921;6922;6923	28;102;229;258;297;450;660;746;849;1462;1777;1842;2174;2207;2209;2474;2490;2589	16;20;1010;1084;1459;2128;2131;2152;2179;2180;2182;2284;2327;2336;2414;2599
Q91W39;B7ZC24;B7ZC23;A2A5L3	Q91W39;B7ZC24;B7ZC23;A2A5L3	2;2;1;1	2;2;1;1	2;2;1;1	Nuclear receptor coactivator 5	Ncoa5	>sp|Q91W39|NCOA5_MOUSE Nuclear receptor coactivator 5 OS=Mus musculus GN=Ncoa5 PE=1 SV=1;>tr|B7ZC24|B7ZC24_MOUSE Nuclear receptor coactivator 5 OS=Mus musculus GN=Ncoa5 PE=4 SV=1;>tr|B7ZC23|B7ZC23_MOUSE Nuclear receptor coactivator 5 OS=Mus musculus GN=Nco	4	2	2	2	2	1	2	1	2	1	2	1	2	1	2	1	5.2	5.2	5.2	65.318	579	579;406;299;68	14	11	18	15	58	9.2991e-15	1.0528	1.2404	79.944	4	1.819	2.4896	7.3409	2	NaN	NaN	NaN	0	0.62905	0.62536
F6X4N5;Q8BVI5;F7CJY7;B7ZCB8;B7ZCB9	F6X4N5;Q8BVI5;F7CJY7;B7ZCB8;B7ZCB9	2;2;2;2;1	2;2;2;2;1	2;2;2;2;1	Syntaxin-16	Stx16	>tr|F6X4N5|F6X4N5_MOUSE Syntaxin-16 OS=Mus musculus GN=Stx16 PE=3 SV=1;>sp|Q8BVI5|STX16_MOUSE Syntaxin-16 OS=Mus musculus GN=Stx16 PE=1 SV=3;>tr|F7CJY7|F7CJY7_MOUSE Syntaxin-16 (Fragment) OS=Mus musculus GN=Stx16 PE=4 SV=1;>tr|B7ZCB8|B7ZCB8_MOUSE Syntaxin	5	2	2	2	0	0	1	1	0	0	1	1	0	0	1	1	14.7	14.7	14.7	37.171	327	327;326;258;164;89			1	2	3	8.2722e-08	1.0486	0.99776	16.778	3	NaN	NaN	NaN	0	NaN	NaN	NaN	0	0.82224	0.81697
Q9R123;B7ZCE0	Q9R123;B7ZCE0	1;1	1;1	1;1	N-acetyltransferase 6	Nat6	>sp|Q9R123|NAT6_MOUSE N-acetyltransferase 6 OS=Mus musculus GN=Nat6 PE=1 SV=1;>tr|B7ZCE0|B7ZCE0_MOUSE N-acetyltransferase 6 (Fragment) OS=Mus musculus GN=Nat6 PE=4 SV=1	2	1	1	1	1	1	1	1	1	1	1	1	1	1	1	1	3.5	3.5	3.5	34.583	314	314;204	2	4	5	1	12	0.00069272	NaN	NaN	NaN	0	NaN	NaN	NaN	0	NaN	NaN	NaN	0	NaN	NaN
B7ZCJ1;B7ZCJ0;Q6DFV3;G3UWM5;A2BHQ2;G3UX38	B7ZCJ1;B7ZCJ0;Q6DFV3	15;15;15;4;2;1	15;15;15;4;2;1	15;15;15;4;2;1	Rho GTPase-activating protein 21	Arhgap21	>tr|B7ZCJ1|B7ZCJ1_MOUSE Rho GTPase activating protein 21 OS=Mus musculus GN=Arhgap21 PE=4 SV=1;>tr|B7ZCJ0|B7ZCJ0_MOUSE Rho GTPase activating protein 21 OS=Mus musculus GN=Arhgap21 PE=4 SV=1;>sp|Q6DFV3|RHG21_MOUSE Rho GTPase-activating protein 21 OS=Mus mus	6	15	15	15	8	7	10	7	8	7	10	7	8	7	10	7	9	9	9	216.98	1955	1955;1945;1944;1263;145;396	19	19	26	18	82	5.4289e-66	1.3911	1.5615	53.953	2	NaN	NaN	NaN	0	NaN	NaN	NaN	0	1.3911	1.5615
B7ZCL8	B7ZCL8	14	14	1		Mpp1	>tr|B7ZCL8|B7ZCL8_MOUSE 55 kDa erythrocyte membrane protein OS=Mus musculus GN=Mpp1 PE=4 SV=1	1	14	14	1	10	8	10	8	10	8	10	8	0	1	0	1	49.6	49.6	2.2	49.784	446	446	20	20	20	20	80	9.7683e-97	0.92916	1.2062	55.847	53	1.2536	1.9334	17.142	14	1.11	1.6473	14.771	12	0.69905	0.63583
B7ZCT1;Q9CX84;Q8BFU4;B7ZCT0	B7ZCT1;Q9CX84;Q8BFU4;B7ZCT0	1;1;1;1	1;1;1;1	1;1;1;1	Regulator of G-protein signaling 19	Rgs19	>tr|B7ZCT1|B7ZCT1_MOUSE Regulator of G-protein signaling 19 OS=Mus musculus GN=Rgs19 PE=4 SV=1;>sp|Q9CX84|RGS19_MOUSE Regulator of G-protein signaling 19 OS=Mus musculus GN=Rgs19 PE=2 SV=1;>tr|Q8BFU4|Q8BFU4_MOUSE GAIP/RGS19 short isoform OS=Mus musculus GN	4	1	1	1	1	1	1	1	1	1	1	1	1	1	1	1	6.6	6.6	6.6	27.494	243	243;216;194;160	15	7	9	9	40	6.2379e-34	NaN	NaN	NaN	0	NaN	NaN	NaN	0	NaN	NaN	NaN	0	NaN	NaN
J3QNK8;Q8CBW3;B7ZCU0;Q8CBW3-3;Q8CBW3-4;B7ZCU3;B7ZCU4;Q8CBW3-2;B7ZCU5;B7ZCU2;Q8CBW3-5	J3QNK8;Q8CBW3;B7ZCU0;Q8CBW3-3;Q8CBW3-4;B7ZCU3;B7ZCU4;Q8CBW3-2;B7ZCU5;B7ZCU2;Q8CBW3-5	11;11;11;11;11;11;11;11;11;11;11	11;11;11;11;11;11;11;11;11;11;11	10;10;10;10;10;10;10;10;10;10;10	Abl interactor 1	Abi1	>tr|J3QNK8|J3QNK8_MOUSE Abl interactor 1 OS=Mus musculus GN=Abi1 PE=4 SV=1;>sp|Q8CBW3|ABI1_MOUSE Abl interactor 1 OS=Mus musculus GN=Abi1 PE=1 SV=3;>tr|B7ZCU0|B7ZCU0_MOUSE Abl interactor 1 OS=Mus musculus GN=Abi1 PE=4 SV=1;>sp|Q8CBW3-3|ABI1_MOUSE Isoform 3	11	11	11	10	7	1	9	4	7	1	9	4	6	1	9	4	26.8	26.8	24.9	52.345	481	481;481;480;476;475;452;451;446;422;393;388	14	4	16	9	43	3.615e-28	1.0672	0.99743	20.495	20	0.49781	0.76406	8.711	6	NaN	NaN	NaN	0	1.2079	1.1147
B7ZMP1;B7ZMP1-2;E9Q1R1	B7ZMP1;B7ZMP1-2;E9Q1R1	2;1;1	2;1;1	2;1;1	Probable Xaa-Pro aminopeptidase 3	Xpnpep3	>sp|B7ZMP1|XPP3_MOUSE Probable Xaa-Pro aminopeptidase 3 OS=Mus musculus GN=Xpnpep3 PE=2 SV=1;>sp|B7ZMP1-2|XPP3_MOUSE Isoform 2 of Probable Xaa-Pro aminopeptidase 3 OS=Mus musculus GN=Xpnpep3;>tr|E9Q1R1|E9Q1R1_MOUSE Probable Xaa-Pro aminopeptidase 3 OS=Mus	3	2	2	2	2	1	2	2	2	1	2	2	2	1	2	2	8.7	8.7	8.7	56.677	506	506;386;205	4	2	4	3	13	2.3686e-23	0.75716	0.70301	46.076	13	1.0886	1.5938	4.9788	4	0.90738	1.2619	22.092	2	0.69083	0.64598
Q8CHP6;B7ZNA5;D3YY34;E9QPT4;Q8CHP6-2;F8WIN6	Q8CHP6;B7ZNA5;D3YY34;E9QPT4;Q8CHP6-2	4;4;4;3;3;1	4;4;4;3;3;1	4;4;4;3;3;1	Polyhomeotic-like protein 3	Phc3	>sp|Q8CHP6|PHC3_MOUSE Polyhomeotic-like protein 3 OS=Mus musculus GN=Phc3 PE=1 SV=2;>tr|B7ZNA5|B7ZNA5_MOUSE Phc3 protein OS=Mus musculus GN=Phc3 PE=2 SV=1;>tr|D3YY34|D3YY34_MOUSE Polyhomeotic-like protein 3 OS=Mus musculus GN=Phc3 PE=4 SV=1;>tr|E9QPT4|E9QP	6	4	4	4	2	2	2	2	2	2	2	2	2	2	2	2	3.8	3.8	3.8	105.35	981	981;951;948;715;715;595	3	4	3	6	16	5.4501e-09	NaN	NaN	NaN	0	NaN	NaN	NaN	0	NaN	NaN	NaN	0	NaN	NaN
B7ZNL3	B7ZNL3	33	2	0		Tpm1	>tr|B7ZNL3|B7ZNL3_MOUSE Tpm1 protein OS=Mus musculus GN=Tpm1 PE=2 SV=1	1	33	2	0	23	25	28	28	1	1	1	1	0	0	0	0	75.4	3.9	0	32.637	284	284	1	1	2	1	5	0	0.96636	0.93579	168.67	5	5.1004	8.1147	NaN	1	3.3042	4.2611	NaN	1	0.21798	0.20863
B7ZNL9;F8VQE6	B7ZNL9;F8VQE6	2;2	2;2	2;2		Tatdn2	>tr|B7ZNL9|B7ZNL9_MOUSE Protein Tatdn2 OS=Mus musculus GN=Tatdn2 PE=2 SV=1;>tr|F8VQE6|F8VQE6_MOUSE Protein Tatdn2 OS=Mus musculus GN=Tatdn2 PE=4 SV=1	2	2	2	2	1	2	1	1	1	2	1	1	1	2	1	1	3.6	3.6	3.6	87.561	783	783;722	5	5	1	6	17	4.2759e-06	NaN	NaN	NaN	0	NaN	NaN	NaN	0	NaN	NaN	NaN	0	NaN	NaN
Q80TH2-2;B7ZNX6;Q80TH2;Q80TH2-1	Q80TH2-2;B7ZNX6;Q80TH2;Q80TH2-1	7;7;6;6	7;7;6;6	7;7;6;6	Protein LAP2	Erbb2ip	>sp|Q80TH2-2|LAP2_MOUSE Isoform 2 of Protein LAP2 OS=Mus musculus GN=Erbb2ip;>tr|B7ZNX6|B7ZNX6_MOUSE Erbb2ip protein OS=Mus musculus GN=Erbb2ip PE=2 SV=1;>sp|Q80TH2|LAP2_MOUSE Protein LAP2 OS=Mus musculus GN=Erbb2ip PE=1 SV=3;>sp|Q80TH2-1|LAP2_MOUSE Isofor	4	7	7	7	3	4	6	3	3	4	6	3	3	4	6	3	7.5	7.5	7.5	162.18	1450	1450;1411;1402;1376	20	20	18	19	77	2.5709e-31	1.6986	1.8643	83.733	8	0.75466	0.97092	86.354	2	0.49513	0.58961	61.92	2	2.5028	2.4241
Q65Z40;B7ZP47;F6YCH1	Q65Z40;B7ZP47	6;6;2	6;6;2	6;6;2	Wings apart-like protein homolog	Wapal	>sp|Q65Z40|WAPL_MOUSE Wings apart-like protein homolog OS=Mus musculus GN=Wapal PE=1 SV=2;>tr|B7ZP47|B7ZP47_MOUSE Wapal protein OS=Mus musculus GN=Wapal PE=2 SV=1	3	6	6	6	1	4	4	2	1	4	4	2	1	4	4	2	7.7	7.7	7.7	134.07	1200	1200;1194;430	1	6	6	5	18	2.7199e-24	1.2222	1.1991	61.236	13	NaN	NaN	NaN	0	0.39792	0.52453	21.39	6	1.5726	1.5148
B7ZWK0;P51954;F6R259	B7ZWK0;P51954	4;4;1	4;4;1	4;4;1	Serine/threonine-protein kinase Nek1	Nek1	>tr|B7ZWK0|B7ZWK0_MOUSE Nek1 protein OS=Mus musculus GN=Nek1 PE=2 SV=1;>sp|P51954|NEK1_MOUSE Serine/threonine-protein kinase Nek1 OS=Mus musculus GN=Nek1 PE=1 SV=2	3	4	4	4	1	3	1	3	1	3	1	3	1	3	1	3	5	5	5	139.66	1231	1231;1203;251	10	12	2	16	40	1.4845e-11	NaN	NaN	NaN	0	NaN	NaN	NaN	0	NaN	NaN	NaN	0	NaN	NaN
Q6ZQ08-4;Q6ZQ08;Q6ZQ08-2;B7ZWL1;Q6ZQ08-3	Q6ZQ08-4;Q6ZQ08;Q6ZQ08-2;B7ZWL1	65;65;65;65;14	65;65;65;65;14	65;65;65;65;14	CCR4-NOT transcription complex subunit 1	Cnot1	>sp|Q6ZQ08-4|CNOT1_MOUSE Isoform 4 of CCR4-NOT transcription complex subunit 1 OS=Mus musculus GN=Cnot1;>sp|Q6ZQ08|CNOT1_MOUSE CCR4-NOT transcription complex subunit 1 OS=Mus musculus GN=Cnot1 PE=1 SV=2;>sp|Q6ZQ08-2|CNOT1_MOUSE Isoform 2 of CCR4-NOT transc	5	65	65	65	35	31	44	35	35	31	44	35	35	31	44	35	37.8	37.8	37.8	266.9	2376	2376;2375;2371;2326;494	74	70	90	75	309	0	0.94981	0.98461	39.642	297	0.55075	0.67249	32.518	72	0.62029	0.69406	27.545	67	1.1525	1.1215
J3QN94;Q99PN3;B8JJ56;Q99PN3-2;B8JJ57;B8JJ53	J3QN94;Q99PN3;B8JJ56;Q99PN3-2;B8JJ57;B8JJ53	1;1;1;1;1;1	1;1;1;1;1;1	1;1;1;1;1;1	Tripartite motif-containing protein 26	Trim26	>tr|J3QN94|J3QN94_MOUSE Tripartite motif-containing protein 26 OS=Mus musculus GN=Trim26 PE=4 SV=1;>sp|Q99PN3|TRI26_MOUSE Tripartite motif-containing protein 26 OS=Mus musculus GN=Trim26 PE=2 SV=3;>tr|B8JJ56|B8JJ56_MOUSE Tripartite motif-containing 26 (Fra	6	1	1	1	0	0	1	0	0	0	1	0	0	0	1	0	3.5	3.5	3.5	62.751	545	545;545;394;326;253;195			2		2	0.00033304	1.1988	1.1445	0.70215	2	NaN	NaN	NaN	0	NaN	NaN	NaN	0	1.1988	1.1445
B8JJ92;Q52KR6;F6Q8C0	B8JJ92;Q52KR6	8;8;1	1;1;0	1;1;0		Acin1	>tr|B8JJ92|B8JJ92_MOUSE Apoptotic chromatin condensation inducer 1 OS=Mus musculus GN=Acin1 PE=4 SV=1;>tr|Q52KR6|Q52KR6_MOUSE Acin1 protein OS=Mus musculus GN=Acin1 PE=2 SV=1	3	8	1	1	6	6	7	5	1	0	0	1	1	0	0	1	13.8	1.2	1.2	67.113	580	580;552;141	1			1	2	2.9315e-133	0.94407	1.0011	14.108	2	0.63869	0.90603	NaN	1	NaN	NaN	NaN	0	NaN	NaN
B8JJC1;Q8BJ37;D3Z075	B8JJC1;Q8BJ37	7;7;1	7;7;1	7;7;1	Tyrosyl-DNA phosphodiesterase 1	Tdp1	>tr|B8JJC1|B8JJC1_MOUSE Tyrosyl-DNA phosphodiesterase 1 OS=Mus musculus GN=Tdp1 PE=4 SV=1;>sp|Q8BJ37|TYDP1_MOUSE Tyrosyl-DNA phosphodiesterase 1 OS=Mus musculus GN=Tdp1 PE=2 SV=2	3	7	7	7	3	5	6	5	3	5	6	5	3	5	6	5	14	14	14	68.59	609	609;609;52	15	10	20	15	60	9.5012e-56	2.1187	2.0556	15.383	4	NaN	NaN	NaN	0	NaN	NaN	NaN	0	2.0827	2.0641
B8JK87;Q8K371;Q3TP05;B8JK81;B8JK86;B8JK82	B8JK87;Q8K371;Q3TP05;B8JK81;B8JK86;B8JK82	4;4;3;2;2;2	4;4;3;2;2;2	4;4;3;2;2;2	Angiomotin-like protein 2	Amotl2	>tr|B8JK87|B8JK87_MOUSE Angiomotin like 2 OS=Mus musculus GN=Amotl2 PE=4 SV=1;>sp|Q8K371|AMOL2_MOUSE Angiomotin-like protein 2 OS=Mus musculus GN=Amotl2 PE=2 SV=1;>tr|Q3TP05|Q3TP05_MOUSE Angiomotin-like protein 2 OS=Mus musculus GN=Amotl2 PE=2 SV=1;>tr|B8J	6	4	4	4	2	2	3	2	2	2	3	2	2	2	3	2	7	7	7	88.934	805	805;772;718;554;220;193	5	3	6	8	22	9.7177e-25	NaN	NaN	NaN	0	NaN	NaN	NaN	0	NaN	NaN	NaN	0	NaN	NaN
B8QI36;B8QI34;Q8BSS9	B8QI36;B8QI34;Q8BSS9	5;3;3	2;1;1	2;1;1	Liprin-alpha-2	Ppfia4;Ppfia2	>tr|B8QI36|B8QI36_MOUSE Liprin-alpha 4 OS=Mus musculus GN=Ppfia4 PE=2 SV=1;>tr|B8QI34|B8QI34_MOUSE Liprin-alpha 2 OS=Mus musculus GN=Ppfia2 PE=2 SV=1;>sp|Q8BSS9|LIPA2_MOUSE Liprin-alpha-2 OS=Mus musculus GN=Ppfia2 PE=1 SV=2	3	5	2	2	2	2	2	3	1	1	0	1	1	1	0	1	4.4	1.4	1.4	133.71	1187	1187;1257;1257	1	1		2	4	9.8381e-13	1.1248	1.2375	54.086	4	0.64072	0.79791	NaN	1	0.51119	0.72014	NaN	1	NaN	NaN
B8ZXI1;B8ZXI1-2	B8ZXI1;B8ZXI1-2	7;5	7;5	7;5	Queuine tRNA-ribosyltransferase subunit QTRTD1	Qtrtd1	>sp|B8ZXI1|QTRD1_MOUSE Queuine tRNA-ribosyltransferase subunit QTRTD1 OS=Mus musculus GN=Qtrtd1 PE=1 SV=2;>sp|B8ZXI1-2|QTRD1_MOUSE Isoform 2 of Queuine tRNA-ribosyltransferase subunit QTRTD1 OS=Mus musculus GN=Qtrtd1	2	7	7	7	2	4	5	3	2	4	5	3	2	4	5	3	23.9	23.9	23.9	46.288	415	415;344	2	4	6	4	16	1.7189e-26	1.1395	1.1995	45.753	16	0.36189	0.53702	7.6852	2	0.52295	0.66751	2.8823	4	1.4112	1.3802
B9EHJ3	B9EHJ3	17	1	1		Tjp1	>tr|B9EHJ3|B9EHJ3_MOUSE Tight junction protein ZO-1 OS=Mus musculus GN=Tjp1 PE=2 SV=1	1	17	1	1	5	8	11	8	0	1	0	1	0	1	0	1	13.3	0.9	0.9	188.85	1685	1685		6		5	11	2.1581e-63	NaN	NaN	NaN	0	NaN	NaN	NaN	0	NaN	NaN	NaN	0	NaN	NaN
B9EHJ7;Q9EPQ8;E9QKY7;Q9EPQ8-2	B9EHJ7;Q9EPQ8;E9QKY7;Q9EPQ8-2	8;8;8;8	8;8;8;8	8;8;8;8	Transcription factor 20	Tcf20	>tr|B9EHJ7|B9EHJ7_MOUSE Tcf20 protein OS=Mus musculus GN=Tcf20 PE=2 SV=1;>sp|Q9EPQ8|TCF20_MOUSE Transcription factor 20 OS=Mus musculus GN=Tcf20 PE=1 SV=2;>tr|E9QKY7|E9QKY7_MOUSE Transcription factor 20 OS=Mus musculus GN=Tcf20 PE=4 SV=1;>sp|Q9EPQ8-2|TCF20	4	8	8	8	6	6	7	6	6	6	7	6	6	6	7	6	4.2	4.2	4.2	215.68	1987	1987;1983;1965;1965	23	15	21	16	75	1.2748e-44	0.55424	0.51458	6.1734	2	NaN	NaN	NaN	0	NaN	NaN	NaN	0	0.55424	0.51458
B9EID4;G3XA57;G3UW57	B9EID4;G3XA57;G3UW57	4;4;4	2;2;2	2;2;2		Rab11fip2	>tr|B9EID4|B9EID4_MOUSE Protein Rab11fip2 OS=Mus musculus GN=Rab11fip2 PE=2 SV=1;>tr|G3XA57|G3XA57_MOUSE Protein Rab11fip2 OS=Mus musculus GN=Rab11fip2 PE=4 SV=1;>tr|G3UW57|G3UW57_MOUSE Protein Rab11fip2 OS=Mus musculus GN=Rab11fip2 PE=4 SV=1	3	4	2	2	2	3	2	2	1	2	0	1	1	2	0	1	9.8	5.1	5.1	59.988	529	529;512;370	5	6		3	14	2.6771e-141	NaN	NaN	NaN	0	NaN	NaN	NaN	0	NaN	NaN	NaN	0	NaN	NaN
B9EIF6;P23949	B9EIF6;P23949	5;4	5;4	5;4	Zinc finger protein 36, C3H1 type-like 2	Zfp36l2	>tr|B9EIF6|B9EIF6_MOUSE Zinc finger protein 36, C3H type-like 2 OS=Mus musculus GN=Zfp36l2 PE=2 SV=1;>sp|P23949|TISD_MOUSE Zinc finger protein 36, C3H1 type-like 2 OS=Mus musculus GN=Zfp36l2 PE=2 SV=1	2	5	5	5	4	3	3	5	4	3	3	5	4	3	3	5	16.3	16.3	16.3	50.069	484	484;367	14	16	14	17	61	9.7486e-29	1.4535	1.2643	19.681	2	NaN	NaN	NaN	0	NaN	NaN	NaN	0	NaN	NaN
B9EJ54;E9Q880	B9EJ54	79;14	79;14	79;14		Nup205	>tr|B9EJ54|B9EJ54_MOUSE MCG21756, isoform CRA_b OS=Mus musculus GN=Nup205 PE=2 SV=1	2	79	79	79	35	49	69	47	35	49	69	47	35	49	69	47	50.9	50.9	50.9	227.46	2008	2008;322	94	100	146	114	454	0	1.047	1.0577	25.467	440	0.84099	1.0637	20.851	94	0.82852	0.88563	30.031	94	1.114	1.0558
B9EJ80	B9EJ80	10	10	10		Pdzd8	>tr|B9EJ80|B9EJ80_MOUSE PDZ domain containing 8 OS=Mus musculus GN=Pdzd8 PE=2 SV=1	1	10	10	10	8	3	4	5	8	3	4	5	8	3	4	5	9.6	9.6	9.6	127.74	1147	1147	37	21	27	20	105	1.9756e-50	0.81581	0.98999	32.724	7	0.71676	0.98999	36.209	5	NaN	NaN	NaN	0	0.81581	0.78722
B9EJ86;G3X9N6	B9EJ86;G3X9N6	6;4	6;4	5;3	Oxysterol-binding protein	Osbpl8	>tr|B9EJ86|B9EJ86_MOUSE Oxysterol-binding protein OS=Mus musculus GN=Osbpl8 PE=2 SV=1;>tr|G3X9N6|G3X9N6_MOUSE Oxysterol-binding protein OS=Mus musculus GN=Osbpl8 PE=3 SV=1	2	6	6	5	0	1	5	4	0	1	5	4	0	1	4	4	7.9	7.9	6.5	101.27	889	889;847		1	7	8	16	5.0539e-34	0.48728	0.47293	19.183	7	NaN	NaN	NaN	0	NaN	NaN	NaN	0	0.51157	0.48966
B9EJR8	B9EJR8	7	7	7		Heatr2	>tr|B9EJR8|B9EJR8_MOUSE HEAT repeat containing 2 OS=Mus musculus GN=Heatr2 PE=2 SV=1	1	7	7	7	4	3	4	3	4	3	4	3	4	3	4	3	15.5	15.5	15.5	93.85	853	853	8	5	7	5	25	6.7778e-28	0.64362	0.8453	60.329	23	0.36176	0.49306	8.7316	8	0.48043	0.62375	24.361	4	1.7487	1.7512
B9EKI3;D6RJK7	B9EKI3;D6RJK7	10;6	10;6	10;6	TATA element modulatory factor	Tmf1	>sp|B9EKI3|TMF1_MOUSE TATA element modulatory factor OS=Mus musculus GN=Tmf1 PE=1 SV=2;>tr|D6RJK7|D6RJK7_MOUSE TATA element modulatory factor OS=Mus musculus GN=Tmf1 PE=4 SV=1	2	10	10	10	1	5	7	2	1	5	7	2	1	5	7	2	13	13	13	121.8	1091	1091;784	2	8	10	6	26	1.6113e-46	1.3884	1.46	33.994	9	NaN	NaN	NaN	0	1.0106	1.2756	62.116	2	1.3884	1.46
B9EKS2;Q6ZPY7;Q6ZPY7-2	B9EKS2;Q6ZPY7;Q6ZPY7-2	10;9;6	10;9;6	10;9;6	Lysine-specific demethylase 3B	Kdm3b	>tr|B9EKS2|B9EKS2_MOUSE Jumonji domain containing 1B OS=Mus musculus GN=Kdm3b PE=2 SV=1;>sp|Q6ZPY7|KDM3B_MOUSE Lysine-specific demethylase 3B OS=Mus musculus GN=Kdm3b PE=1 SV=2;>sp|Q6ZPY7-2|KDM3B_MOUSE Isoform 2 of Lysine-specific demethylase 3B OS=Mus mus	3	10	10	10	4	4	7	3	4	4	7	3	4	4	7	3	8.9	8.9	8.9	191.46	1762	1762;1562;1124	14	7	15	6	42	1.5607e-26	2.1764	2.0872	104.77	12	0.20433	0.25653	9.1379	3	0.24102	0.30242	NaN	1	2.3321	2.2668
CON__ENSEMBL:ENSBTAP00000006074	CON__ENSEMBL:ENSBTAP00000006074	2	2	2			>ENSEMBL:ENSBTAP00000006074 (Bos taurus) 81 kDa protein	1	2	2	2	1	2	1	0	1	2	1	0	1	2	1	0	4	4	4	80.674	747	747	5	3	4		12	8.4329e-06	0.23979	0.24209	49.375	7	0.23979	0.29483	79.129	3	0.14228	0.16397	NaN	1	0.24051	0.24209
CON__ENSEMBL:ENSBTAP00000007350;P01029	CON__ENSEMBL:ENSBTAP00000007350	68;7	68;7	12;0			>ENSEMBL:ENSBTAP00000007350 (Bos taurus) similar to Complement C4-A precursor	2	68	68	12	43	42	57	51	43	42	57	51	7	8	8	10	47.6	47.6	10.4	192.99	1742	1742;1738	177	178	274	269	898	0	0.082538	0.089953	134.07	763	0.097188	0.13852	144.94	137	0.075932	0.10302	102.53	163	0.065768	0.061296
CON__ENSEMBL:ENSBTAP00000016046;Q08879;Q08879-2	CON__ENSEMBL:ENSBTAP00000016046	10;4;2	10;4;2	10;4;2			>ENSEMBL:ENSBTAP00000016046 (Bos taurus) similar to fibulin-1 C isoform 1	3	10	10	10	7	3	5	6	7	3	5	6	7	3	5	6	21.8	21.8	21.8	77.456	706	706;705;685	13	4	10	8	35	3.557e-226	0.16046	0.22884	146.48	22	0.18583	0.26045	81.022	9	1.0167	1.3717	246.78	4	0.074827	0.078434
CON__ENSEMBL:ENSBTAP00000018229;CON__Q3MHN5	CON__ENSEMBL:ENSBTAP00000018229;CON__Q3MHN5	3;3	3;3	3;3			>ENSEMBL:ENSBTAP00000018229 (Bos taurus) 54 kDa protein;>Q3MHN5 SWISS-PROT:Q3MHN5 (Bos taurus) Vitamin D-binding protein precursor	2	3	3	3	1	1	1	1	1	1	1	1	1	1	1	1	7.8	7.8	7.8	53.661	475	475;474	2	2	1	2	7	3.9761e-08	0.57845	0.83719	83.366	7	0.26909	0.35816	97.057	2	0.56509	0.83662	0.096151	2	3.0983	2.7706
CON__ENSEMBL:ENSBTAP00000024146	CON__ENSEMBL:ENSBTAP00000024146	77	77	74			>ENSEMBL:ENSBTAP00000024146 (Bos taurus) similar to alpha-2-macroglobulin isoform 1	1	77	77	74	63	61	76	68	63	61	76	68	60	59	73	66	66.2	66.2	64.7	164.34	1477	1477	555	537	987	910	2989	0	0.084535	0.090908	136.61	2684	0.087306	0.12044	145.09	480	0.095529	0.13325	113.2	494	0.074783	0.071649
1703476;1703477;1703478;1703479;1703480;1703481;1703482;1703483;1703484;1703485;1703486;1703487;1703488;1703489;1703490;1703491;1703492;1703493;1703494;1703495;1703496;1703497;1703498;1703499;1703500;1703501;1703502;1703503;1703504;1703505;1703506;1703507;1703508;1703509;1703510;1703511;1703512;1703513;1703514;1703515;1703516;1703517;1703518;1703519;1703520;1703521;1703522;1703523;1703524;1703525…	14336;59892;82015;99831;123536;123633;146856;184405;188254;244258;253195;267373;269798;275745;288249;311459;312185;385835;395919;475356;477935;500635;510242;531486;566504;575573;580725;583995;597878;611699;621710;664167;667295;706750;736326;761197;761273;769156;776353;777951;936636;946216;966246;995246;995265;1085733;1094817;1141930;1161500;1174848;1189409;1237798;1248571;1295701;1303910;1303913;…	382;383;384;385;386;387;388;389;390;391		32;101;500;607;668;675;803;963;1116;1212
CON__ENSEMBL:ENSBTAP00000032840	CON__ENSEMBL:ENSBTAP00000032840	26	26	25			>ENSEMBL:ENSBTAP00000032840 (Bos taurus) similar to apolipoprotein B, partial	1	26	26	25	13	10	20	20	13	10	20	20	12	9	19	19	40	40	38.5	92.273	825	825	20	16	47	44	127	2.126e-175	0.10614	0.10527	108.57	95	0.059696	0.097584	153.05	14	0.19028	0.23237	95.524	15	0.12045	0.12008
CON__ENSEMBL:ENSBTAP00000034412	CON__ENSEMBL:ENSBTAP00000034412	8	8	8			>ENSEMBL:ENSBTAP00000034412 (Bos taurus) similar to C4b-binding protein alpha chain	1	8	8	8	2	2	6	4	2	2	6	4	2	2	6	4	34.7	34.7	34.7	22.336	199	199	2	2	12	7	23	9.7702e-27	0.18915	0.18036	96.989	19	0.25519	0.37637	30.524	2	1.2621	1.9447	NaN	1	0.13838	0.13445
CON__ENSEMBL:ENSBTAP00000037665	CON__ENSEMBL:ENSBTAP00000037665	16	16	16			>ENSEMBL:ENSBTAP00000037665 (Bos taurus) similar to Pregnancy zone protein, partial	1	16	16	16	13	9	15	14	13	9	15	14	13	9	15	14	40.1	40.1	40.1	65.19	578	578	68	74	120	105	367	0	0.11705	0.12612	114.04	305	0.082923	0.11842	142.41	56	0.12678	0.17268	81.477	69	0.14046	0.13367
CON__P00761	CON__P00761	9	9	9			>P00761 SWISS-PROT:P00761|TRYP_PIG Trypsin - Sus scrofa (Pig).	1	9	9	9	6	7	7	8	6	7	7	8	6	7	7	8	49.8	49.8	49.8	24.409	231	231	232	141	274	140	787	0	0.024574	0.027427	153.04	469	0.012832	0.014886	149.19	133	0.033767	0.047366	107.52	84	0.021198	0.018916
CON__P01030	CON__P01030	61	5	5			>P01030 SWISS-PROT:P01030 (Bos taurus) similar to Complement C4-A precursor	1	61	5	5	38	35	52	44	2	1	3	3	2	1	3	3	41.5	4.3	4.3	192.79	1741	1741	3	1	4	5	13	0	0.064739	0.069242	82.137	10	0.12719	0.18959	33.112	2	0.066452	0.081262	NaN	1	0.091185	0.097078
CON__P01044-1;CON__Q2KJ62;CON__P01045-1	CON__P01044-1;CON__Q2KJ62;CON__P01045-1	4;4;4	4;4;4	4;4;4			>P01044-1 SWISS-PROT:P01044-1 (Bos taurus) Isoform HMW of Kininogen-1 precursor;>Q2KJ62 TREMBL:Q2KJ62 (Bos taurus) KNG protein;>P01045-1 SWISS-PROT:P01045-1 (Bos taurus) Isoform HMW of Kininogen-2 precursor	3	4	4	4	2	1	1	1	2	1	1	1	2	1	1	1	6.3	6.3	6.3	68.889	621	621;621;619	2	1	2	1	6	5.8697e-09	0.54808	0.69994	32.39	2	0.41801	0.55667	NaN	1	0.71862	0.88009	NaN	1	NaN	NaN
CON__P01966	CON__P01966	8	8	8			>P01966 SWISS-PROT:P01966 (Bos taurus) Hemoglobin subunit alpha	1	8	8	8	3	6	0	5	3	6	0	5	3	6	0	5	80.3	80.3	80.3	15.184	142	142	5	14		20	39	2.1892e-33	0.1217	0.12472	108.99	34	0.14899	0.21236	77.224	5	0.12381	0.18392	102.96	10	NaN	NaN
CON__P02533;CON__P08779;Q61781;CON__Q9QWL7;Q9QWL7;CON__Q04695;CON__Q3ZAW8;CON__Q9Z2K1;Q9Z2K1	CON__P02533;CON__P08779;Q61781;CON__Q9QWL7;Q9QWL7;CON__Q04695;CON__Q3ZAW8;CON__Q9Z2K1;Q9Z2K1	6;5;4;4;4;4;3;3;3	3;2;2;2;2;2;1;1;1	2;1;1;1;1;1;1;1;1	Keratin, type I cytoskeletal 14;Keratin, type I cytoskeletal 17;Keratin, type I cytoskeletal 16	Krt14;Krt17;Krt16	>P02533 SWISS-PROT:P02533 Tax_Id=9606 Gene_Symbol=KRT14 Keratin, type I cytoskeletal 14;>P08779 SWISS-PROT:P08779 Tax_Id=9606 Gene_Symbol=KRT16 Keratin, type I cytoskeletal 16;>sp|Q61781|K1C14_MOUSE Keratin, type I cytoskeletal 14 OS=Mus musculus GN=Krt14	9	6	3	2	2	3	3	5	0	0	1	2	0	0	1	1	11.9	7	5.1	51.621	472	472;473;484;433;433;432;474;469;469			1	3	4	9.1227e-19	0.066919	0.066268	14.329	3	NaN	NaN	NaN	0	NaN	NaN	NaN	0	NaN	NaN
CON__P02584	CON__P02584	12	3	3			>P02584 SWISS-PROT:P02584 (Bos taurus) Profilin-1	1	12	3	3	3	12	3	11	1	3	1	2	1	3	1	2	88.6	42.9	42.9	15.057	140	140	3	8	2	8	21	0	1.2239	1.139	22.594	7	NaN	NaN	NaN	0	0.53706	0.81556	11.153	3	NaN	NaN
CON__P02662	CON__P02662	6	6	6			>P02662 SWISS-PROT:P02662 Alpha-S1-casein - Bos taurus (Bovine).	1	6	6	6	0	0	6	0	0	0	6	0	0	0	6	0	35.7	35.7	35.7	22.975	199	199			18		18	2.1171e-49	0.033777	0.031954	97.543	10	NaN	NaN	NaN	0	NaN	NaN	NaN	0	0.033777	0.031954
CON__P02663	CON__P02663	3	3	3			>P02663 SWISS-PROT:P02663 Alpha-S2-casein [Contains: Casocidin-1 - Bos taurus (Bovine).	1	3	3	3	0	0	3	0	0	0	3	0	0	0	3	0	15	15	15	24.348	207	207			5		5	3.3386e-16	0.07482	0.073491	274.57	3	NaN	NaN	NaN	0	NaN	NaN	NaN	0	0.07482	0.073491
CON__P02666	CON__P02666	2	2	2			>P02666 SWISS-PROT:P02666 Beta-casein - Bos taurus (Bovine).	1	2	2	2	0	0	2	0	0	0	2	0	0	0	2	0	16.7	16.7	16.7	23.583	209	209			6		6	2.1701e-100	0.15204	0.14459	58.568	3	NaN	NaN	NaN	0	NaN	NaN	NaN	0	0.15204	0.14459
CON__P02668	CON__P02668	4	4	4			>P02668 SWISS-PROT:P02668 Kappa-casein [Contains: Casoxin C; Casoxin 6; Casoxin A; Casoxin B; Casoplatelin] - Bos taurus (Bovine).	1	4	4	4	0	0	4	0	0	0	4	0	0	0	4	0	40.2	40.2	40.2	18.974	169	169			10		10	2.8686e-20	0.030327	0.029256	NaN	1	NaN	NaN	NaN	0	NaN	NaN	NaN	0	0.030327	0.029256
CON__P02754	CON__P02754	4	4	4			>P02754 SWISS-PROT:P02754 Beta-lactoglobulin - Bos taurus (Bovine).	1	4	4	4	0	2	4	0	0	2	4	0	0	2	4	0	32.7	32.7	32.7	18.281	162	162		6	8		14	9.2029e-117	0.070264	0.07452	78.484	11	NaN	NaN	NaN	0	0.04646	0.052953	105.56	6	0.077173	0.07452
CON__P02768-1	CON__P02768-1	6	2	2			>P02768-1 SWISS-PROT:P02768-1 Tax_Id=9606 Gene_Symbol=ALB Isoform 1 of Serum albumin precursor	1	6	2	2	4	5	5	4	1	1	2	0	1	1	2	0	10.7	4.4	4.4	69.366	609	609	1	1	2		4	6.9744e-50	0.92142	0.97388	7.3073	4	0.84492	1.1206	NaN	1	0.65751	0.96383	NaN	1	1.0397	0.97266
CON__P02769;P07724	CON__P02769	50;1	50;1	46;1			>P02769 SWISS-PROT:P02769 (Bos taurus) Bovine serum albumin precursor	2	50	50	46	43	37	43	42	43	37	43	42	40	33	40	38	76.6	76.6	70.3	69.293	607	607;608	306	151	425	243	1125	0	0.065541	0.07531	121.7	892	0.059864	0.083134	109.77	241	0.070392	0.089726	98.986	123	0.061084	0.056806
CON__P02777	CON__P02777	6	6	6			>P02777 SWISS-PROT:P02777 (Bos taurus) similar to Platelet factor 4	1	6	6	6	1	6	2	4	1	6	2	4	1	6	2	4	17.4	17.4	17.4	24.241	230	230	2	15	3	20	40	1.0275e-113	0.10283	0.10678	114.3	31	0.18453	0.26235	NaN	1	0.052207	0.07792	109.71	13	0.10863	0.10678
CON__P04258	CON__P04258	18	4	4			>P04258 SWISS-PROT:P04258 (Bos taurus) Similar to Collagen alpha 1(III) chain	1	18	4	4	9	5	17	6	2	1	4	1	2	1	4	1	14.5	3.5	3.5	138.44	1466	1466	6	3	7	2	18	4.8681e-247	0.35426	0.50435	141.5	18	0.20317	0.2942	68.605	6	0.15913	0.19689	47.239	3	3.3807	3.1665
CON__P04264;CON__H-INV:HIT000016045	CON__P04264	30;2	30;2	18;0			>P04264 SWISS-PROT:P04264 Tax_Id=9606 Gene_Symbol=KRT1 Keratin, type II cytoskeletal 1	2	30	30	18	17	27	25	20	17	27	25	20	10	16	14	11	48.8	48.8	33.9	66.017	644	644;99	212	271	302	224	1009	0	0.10345	0.12095	127.44	781	0.10474	0.15144	131.35	170	0.10038	0.13616	110.46	216	0.097303	0.094874
CON__P06868	CON__P06868	3	3	3			>P06868 SWISS-PROT:P06868 (Bos taurus) Plasminogen precursor	1	3	3	3	1	1	2	1	1	1	2	1	1	1	2	1	4.9	4.9	4.9	91.215	812	812	1	3	4	2	10	1.3693e-07	1.1104	1.0489	169.87	3	0.047613	0.06406	NaN	1	NaN	NaN	NaN	0	1.2544	1.2029
CON__P12763;P29699	CON__P12763	13;1	13;1	13;1			>P12763 SWISS-PROT:P12763 (Bos taurus) Alpha-2-HS-glycoprotein precursor	2	13	13	13	11	11	12	11	11	11	12	11	11	11	12	11	53.2	53.2	53.2	38.418	359	359;345	153	198	163	133	647	0	0.089693	0.10401	104.68	254	0.066504	0.095544	101.08	56	0.096839	0.12482	87.451	77	0.063308	0.062525
CON__P13645;CON__P02535-1;P02535;A2A513;P02535-2;P02535-3;CON__Q7Z3Y8;CON__P08730-1;P08730;P08730-2;CON__Q7Z3Y7;CON__Q148H6;CON__Q7Z3Z0;A1L317;CON__REFSEQ:XP_986630;CON__O76013;A6BLY7;B1ATJ5;CON__A2AB72;Q9Z320;Q8VCW2;CON__A2A5Y0;Q61765;Q61897	CON__P13645	30;10;10;10;10;10;4;4;4;4;3;3;2;1;1;1;1;1;1;1;1;1;1;1	30;10;10;10;10;10;4;4;4;4;3;3;2;1;1;1;1;1;1;1;1;1;1;1	25;6;6;6;6;6;1;0;0;0;1;1;1;0;0;0;0;0;0;0;0;0;0;0			>P13645 SWISS-PROT:P13645 Tax_Id=9606 Gene_Symbol=KRT10 Keratin, type I cytoskeletal 10	24	30	30	25	16	25	24	18	16	25	24	18	14	21	21	15	56.3	56.3	50.4	59.51	593	593;570;570;561;561;462;459;437;437;311;486;464;450;512;476;467;462;453;453;448;446;416;416;404	122	216	306	143	787	0	0.13258	0.14449	121.15	644	0.14874	0.21416	131.21	94	0.08522	0.11956	124.83	192	0.14911	0.14252
CON__P15497	CON__P15497	12	12	12			>P15497 SWISS-PROT:P15497 (Bos taurus) Apolipoprotein A-I precursor	1	12	12	12	4	4	11	5	4	4	11	5	4	4	11	5	44.9	44.9	44.9	30.276	265	265	6	6	17	14	43	3.3622e-82	0.10619	0.10579	92.499	41	0.095031	0.14727	101.35	6	0.075747	0.10553	49	6	0.089935	0.079858
CON__P28800	CON__P28800	2	2	2			>P28800 SWISS-PROT:P28800 (Bos taurus) Alpha-2-antiplasmin precursor	1	2	2	2	1	1	2	1	1	1	2	1	1	1	2	1	7.1	7.1	7.1	54.71	492	492	4	5	10	4	23	4.5191e-35	2.0225	1.9204	353.21	2	NaN	NaN	NaN	0	NaN	NaN	NaN	0	2.0225	1.9204
CON__P34955	CON__P34955	19	19	19			>P34955 SWISS-PROT:P34955 (Bos taurus) Alpha-1-antiproteinase precursor	1	19	19	19	18	17	18	18	18	17	18	18	18	17	18	18	37	37	37	46.103	416	416	129	161	215	179	684	0	0.082802	0.097809	129.47	553	0.085367	0.12922	125.77	100	0.092158	0.12972	115.55	140	0.050024	0.048036
CON__P35527	CON__P35527	22	21	21			>P35527 SWISS-PROT:P35527 Tax_Id=9606 Gene_Symbol=KRT9 Keratin, type I cytoskeletal 9	1	22	21	21	11	18	16	19	11	17	16	18	11	17	16	18	52.8	52.8	52.8	62.129	623	623	57	110	122	104	393	0	0.1063	0.12406	99.916	295	0.10866	0.15423	91.207	46	0.10139	0.12842	89.447	87	0.094445	0.089282
CON__P35908;CON__Q6NXH9;Q6NXH9	CON__P35908	30;3;3	27;2;2	20;0;0			>P35908 SWISS-PROT:P35908 Tax_Id=9606 Gene_Symbol=KRT2 Keratin, type II cytoskeletal 2 epidermal	3	30	27	20	9	28	21	13	7	26	18	11	4	19	14	6	60	56.9	46.4	65.865	645	645;539;539	63	102	116	48	329	0	0.11283	0.12794	98.909	294	0.090943	0.13793	98.228	58	0.085406	0.11927	90.686	90	0.13552	0.13766
CON__P41361	CON__P41361	8	8	8			>P41361 SWISS-PROT:P41361 (Bos taurus) Antithrombin-III precursor	1	8	8	8	3	5	6	4	3	5	6	4	3	5	6	4	26.2	26.2	26.2	52.347	465	465	7	11	10	6	34	5.0727e-23	0.19194	0.22901	96.097	27	0.15237	0.21008	29.014	5	0.16211	0.24157	111.44	9	0.21751	0.1882
CON__P60712;P60710;E9Q1F2;E9Q606;E9QAZ1;F8WGM8;E9Q2D1;F6WX90;E9Q3M9	CON__P60712;P60710;E9Q1F2	44;44;33;16;14;10;8;3;1	2;2;2;2;2;0;2;0;0	0;0;0;0;0;0;0;0;0	Actin, cytoplasmic 1;Actin, cytoplasmic 1, N-terminally processed	Actb	>P60712 SWISS-PROT:P60712 (Bos taurus) Actin, cytoplasmic 1;>sp|P60710|ACTB_MOUSE Actin, cytoplasmic 1 OS=Mus musculus GN=Actb PE=1 SV=1;>tr|E9Q1F2|E9Q1F2_MOUSE Actin, cytoplasmic 1 OS=Mus musculus GN=Actb PE=3 SV=1	9	44	2	0	34	36	41	37	2	1	1	1	0	0	0	0	99.5	4.8	0	41.736	375	375;375;295;150;125;105;108;43;1175	27	21	19	17	84	0	1.0497	1.2215	42.235	80	1.3152	1.5579	40.019	26	1.3985	1.5206	25.186	20	0.7838	0.84745
6;368987;368988;368989;368990;368991;368992;368993;368994;368995;368996;368997;368998;368999;369000;369001;369002;369003;369004;369005;369006;369007;369008;369009;369010;369011;369012;369013;369014;369015;369016;369017;369018;369019;369020;369021;369022;369023;369024;369025;369026;369027;369028;369029;369030;369031;369032;369033;369034;369035;369036;369037;369038;369039;369040;369041;369042;36904…
0;853761;853762;853763;853764;853765;853766;853767;853768;853769;853770;853771;853772;853773;853774;853775;853776;853777;853778;853779;853780;853781;853782;853783;853784;853785;853786;853787;853788;853789;853790;853791;853792;853793;853794;853795;853796;853797;853798;853799;853800;853801;853802;853803;853804;853805;853806;853807;853808;853809;853810;853811;853812;853813;853814;853815;853816;85381…
8;1564969;1564970;1564971;1564972;1564973;1564974;1564975;1564976;1564977;1564978;1564979;1564980;1564981;1564982;1564983;1564984;1564985;1564986;1564987;1564988;1564989;1564990;1564991;1564992;1564993;1564994;1564995;1564996;1564997;1564998;1564999;1565000;1565001;1565002;1565003;1565004;1565005;1565006;1565007;1565008;1565009;1565010;1565011;1565012;1565013;1565014;1565015;1565016;1565017;15650…	64607;190262;190504;205507;205531;214384;232986;255664;276915;276953;279988;310295;310570;368967;369626;371455;371806;475634;613292;613375;643871;643910;699925;699971;709750;709759;765755;776941;834224;852650;860737;860748;1045205;1072005;1079357;1208306;1208370;1268069;1485226;1565073;1586285;1586419;1766349;1772618	421;422;423;424;425;426;427;428;429;430;431;432;433;434	752;753	16;44;47;119;123;132;153;190;227;269;283;305;325;355	239;323
CON__Q03247	CON__Q03247	4	4	4			>Q03247 SWISS-PROT:Q03247 (Bos taurus) Apolipoprotein E precursor	1	4	4	4	0	0	3	2	0	0	3	2	0	0	3	2	13.6	13.6	13.6	35.979	316	316			4	3	7	4.1713e-12	0.19922	0.18275	144.42	7	NaN	NaN	NaN	0	NaN	NaN	NaN	0	0.18422	0.16895
CON__Q05443	CON__Q05443	2	2	2			>Q05443 SWISS-PROT:Q05443 (Bos taurus) Lumican precursor	1	2	2	2	0	0	2	0	0	0	2	0	0	0	2	0	6.1	6.1	6.1	38.756	342	342			4		4	2.268e-05	0.048721	0.04787	44.483	2	NaN	NaN	NaN	0	NaN	NaN	NaN	0	0.048721	0.04787
CON__Q0IIK2;CON__Q29443;CON__Q2HJF0;Q921I1;F7BAE9;F7CJN9	CON__Q0IIK2;CON__Q29443	37;36;2;1;1;1	37;36;2;1;1;1	36;35;1;0;0;0			>Q0IIK2 TREMBL:Q0IIK2 (Bos taurus) Transferrin;>Q29443 SWISS-PROT:Q29443 Serotransferrin - Bos taurus (Bovine).	6	37	37	36	23	18	33	25	23	18	33	25	23	18	32	24	61.2	61.2	61.2	77.738	704	704;685;622;697;278;249	133	88	195	96	512	0	0.045332	0.04862	165.02	450	0.039954	0.05679	157.29	125	0.062948	0.085518	145.9	72	0.025171	0.023717
CON__Q0V8M9;Q61704;E9PVS1	CON__Q0V8M9	19;5;5	19;5;5	19;5;5			>Q0V8M9 TREMBL:Q0V8M9;Q9TRI0 (Bos taurus) similar to inter-alpha (globulin) inhibitor H3 isoform 2	3	19	19	19	9	9	17	14	9	9	17	14	9	9	17	14	26.3	26.3	26.3	99.536	891	891;889;699	23	23	65	64	175	1.0819e-174	0.075961	0.082758	120.72	154	0.094289	0.13071	137.42	17	0.10738	0.14499	91.489	22	0.049311	0.047021
CON__Q28065	CON__Q28065	5	5	5			>Q28065 SWISS-PROT:Q28065 (Bos taurus) C4b-binding protein alpha chain precursor	1	5	5	5	0	2	4	3	0	2	4	3	0	2	4	3	9.8	9.8	9.8	68.886	610	610		2	5	5	12	1.4677e-50	0.15723	0.14732	68.404	10	NaN	NaN	NaN	0	0.31257	0.42182	26.063	2	0.091055	0.080531
CON__Q28194	CON__Q28194	26	8	8			>Q28194 TREMBL:Q28194 (Bos taurus) Thrombospondin-1	1	26	8	8	18	14	25	13	4	2	8	3	4	2	8	3	25.8	8.5	8.5	129.39	1170	1170	5	7	14	7	33	6.8809e-208	0.21958	0.24088	141.21	22	0.17782	0.25908	58.094	3	0.14839	0.18351	49.475	2	0.28013	0.27234
CON__Q2UVX4	CON__Q2UVX4	5	5	4			>Q2UVX4 SWISS-PROT:Q2UVX4 (Bos taurus) Complement C3 precursor	1	5	5	4	1	0	5	1	1	0	5	1	0	0	4	1	3.5	3.5	2.7	187.37	1662	1662	2		7	1	10	5.1493e-12	0.15956	0.18754	101.95	6	0.278	0.38497	29.403	2	NaN	NaN	NaN	0	0.091529	0.087564
CON__Q3SX09;CON__P02070;A8DUK4;P02088;P02089;P02104;E9Q223	CON__Q3SX09	11;3;2;2;2;1;1	11;3;2;2;2;1;1	11;3;2;2;2;1;1			>Q3SX09 TREMBL:Q3SX09 (Bos taurus) similar to HBG protein	7	11	11	11	0	8	0	11	0	8	0	11	0	8	0	11	61.2	61.2	61.2	22.06	201	201;145;147;147;147;147;103		21		26	47	5.4023e-172	0.084005	0.07779	133.01	37	NaN	NaN	NaN	0	0.17774	0.25821	149.96	15	NaN	NaN
CON__Q3SX14	CON__Q3SX14	22	1	1			>Q3SX14 TREMBL:Q3SX14 (Bos taurus) Similar to Gelsolin	1	22	1	1	15	15	20	18	0	1	0	1	0	1	0	1	29.4	1.4	1.4	85.686	781	781		1		2	3	0	1.0322	0.99365	14.937	3	NaN	NaN	NaN	0	0.5952	0.81019	NaN	1	NaN	NaN
CON__Q3SZ57	CON__Q3SZ57	10	10	10			>Q3SZ57 SWISS-PROT:Q3SZ57 (Bos taurus) Alpha-fetoprotein precursor	1	10	10	10	1	2	9	2	1	2	9	2	1	2	9	2	23.4	23.4	23.4	68.587	610	610	9	4	17	4	34	1.2515e-40	0.12962	0.16096	89.566	29	0.13681	0.17555	44.769	9	0.12248	0.14452	23.33	4	0.1268	0.12576
CON__Q3SZV7	CON__Q3SZV7	22	22	22			>Q3SZV7 TREMBL:Q3SZV7 (Bos taurus) Similar to hemopexin	1	22	22	22	14	14	19	17	14	14	19	17	14	14	19	17	57	57	57	52.295	460	460	56	38	102	79	275	0	0.090402	0.096002	99.636	203	0.07335	0.10799	99.922	43	0.1272	0.18058	78.995	27	0.082856	0.077311
CON__Q3T052	CON__Q3T052	8	8	8			>Q3T052 TREMBL:Q3T052;Q5EA67 (Bos taurus) Inter-alpha (Globulin) inhibitor H4	1	8	8	8	1	2	5	2	1	2	5	2	1	2	5	2	13.4	13.4	13.4	101.51	916	916	1	2	15	2	20	4.6988e-96	0.15124	0.14291	117.14	14	NaN	NaN	NaN	0	0.27866	0.38516	147.53	2	0.13912	0.12738
CON__Q3TTY5;Q3TTY5	CON__Q3TTY5;Q3TTY5	8;8	1;1	1;1	Keratin, type II cytoskeletal 2 epidermal	Krt2	>Q3TTY5 SWISS-PROT:Q3TTY5 Tax_Id=10090 Gene_Symbol=Krt2 Keratin, type II cytoskeletal 2 epidermal;>sp|Q3TTY5|K22E_MOUSE Keratin, type II cytoskeletal 2 epidermal OS=Mus musculus GN=Krt2 PE=1 SV=1	2	8	1	1	1	7	5	4	0	1	1	0	0	1	1	0	10.3	2.4	2.4	70.922	707	707;707		1	2		3	1.0721e-28	NaN	NaN	NaN	0	NaN	NaN	NaN	0	NaN	NaN	NaN	0	NaN	NaN
CON__Q3ZBS7	CON__Q3ZBS7	5	5	5			>Q3ZBS7 TREMBL:Q3ZBS7 (Bos taurus) Vitronectin	1	5	5	5	3	3	3	2	3	3	3	2	3	3	3	2	11	11	11	54.099	484	484	4	10	7	5	26	2.2177e-13	0.24218	0.32395	92.285	23	0.43838	0.67292	NaN	1	0.26091	0.34562	79.954	10	0.11718	0.11315
CON__Q7Z3Y9	CON__Q7Z3Y9	2	1	1			>Q7Z3Y9 SWISS-PROT:Q7Z3Y9 Tax_Id=9606 Gene_Symbol=KRT26 Keratin, type I cytoskeletal 26	1	2	1	1	1	1	2	1	0	0	1	0	0	0	1	0	3.8	1.9	1.9	51.91	468	468			1		1	2.3811e-11	0.99819	1.0202	NaN	1	NaN	NaN	NaN	0	NaN	NaN	NaN	0	0.99819	1.0202
CON__Q9TRI1;G3X977;Q61703	CON__Q9TRI1	4;1;1	4;1;1	4;1;1			>Q9TRI1 TREMBL:Q9TRI1 (Bos taurus) similar to inter-alpha-trypsin inhibitor heavy chain2	3	4	4	4	1	0	3	0	1	0	3	0	1	0	3	0	5.5	5.5	5.5	106.19	946	946;950;946	1		3		4	2.7832e-09	0.67308	0.60527	74.243	3	NaN	NaN	NaN	0	NaN	NaN	NaN	0	0.67308	0.60527
CON__Q9TTE1	CON__Q9TTE1	12	12	8			>Q9TTE1 SWISS-PROT:Q9TTE1 (Bos taurus) Endopin-1 precursor	1	12	12	8	3	4	8	11	3	4	8	11	2	3	6	7	31.4	31.4	25.3	46.203	411	411	8	10	36	37	91	5.3581e-125	0.1219	0.11515	81.967	64	0.23468	0.29241	88.628	5	0.11684	0.16075	69.037	6	0.12745	0.11457
CON__Q9U6Y5	CON__Q9U6Y5	1	1	1			>Q9U6Y5 SWISS-PROT:Q9U6Y5 Green fluorescent protein (GFP-Cter-HisTag)	1	1	1	1	0	0	1	0	0	0	1	0	0	0	1	0	9.2	9.2	9.2	28.106	249	249			3		3	0.0004403	0.14832	0.14316	12.466	2	NaN	NaN	NaN	0	NaN	NaN	NaN	0	0.14832	0.14316
CON__REFSEQ:XP_001252647	CON__REFSEQ:XP_001252647	7	6	3			>REFSEQ:XP_001252647 (Bos taurus) similar to endopin 2B	1	7	6	3	1	2	2	6	1	2	2	5	0	1	1	2	16.3	14.4	6.7	46.897	417	417	8	4	5	13	30	4.6552e-12	0.14131	0.16024	101.19	10	NaN	NaN	NaN	0	0.10681	0.14913	143.36	3	NaN	NaN
CON__Streptavidin	CON__Streptavidin	1	1	1			>Streptavidin (S.avidinii)	1	1	1	1	0	1	0	0	0	1	0	0	0	1	0	0	11.2	11.2	11.2	16.622	160	160		2			2	8.7978e-24	0.23391	0.27419	129.93	2	NaN	NaN	NaN	0	0.23391	0.27419	129.93	2	NaN	NaN
Q52KF3-3;D3YTL8;Q52KF3-2;Q52KF3;D3Z495	Q52KF3-3;D3YTL8;Q52KF3-2;Q52KF3;D3Z495	2;2;2;2;2	2;2;2;2;2	2;2;2;2;2	Protein spire homolog 1	Spire1	>sp|Q52KF3-3|SPIR1_MOUSE Isoform 3 of Protein spire homolog 1 OS=Mus musculus GN=Spire1;>tr|D3YTL8|D3YTL8_MOUSE Protein spire homolog 1 OS=Mus musculus GN=Spire1 PE=4 SV=1;>sp|Q52KF3-2|SPIR1_MOUSE Isoform 2 of Protein spire homolog 1 OS=Mus musculus GN=Spi	5	2	2	2	2	1	1	1	2	1	1	1	2	1	1	1	3.4	3.4	3.4	75.039	656	656;643;599;598;515	9	2	8	1	20	6.0219e-06	NaN	NaN	NaN	0	NaN	NaN	NaN	0	NaN	NaN	NaN	0	NaN	NaN
Q9D0N7;D3Z616;D3YTP6	Q9D0N7;D3Z616;D3YTP6	1;1;1	1;1;1	1;1;1	Chromatin assembly factor 1 subunit B	Chaf1b	>sp|Q9D0N7|CAF1B_MOUSE Chromatin assembly factor 1 subunit B OS=Mus musculus GN=Chaf1b PE=2 SV=1;>tr|D3Z616|D3Z616_MOUSE Chromatin assembly factor 1 subunit B (Fragment) OS=Mus musculus GN=Chaf1b PE=4 SV=1;>tr|D3YTP6|D3YTP6_MOUSE Chromatin assembly factor	3	1	1	1	1	0	1	1	1	0	1	1	1	0	1	1	1.9	1.9	1.9	63.131	572	572;96;79	2		2	1	5	6.0934e-05	1.0493	1.0751	17.366	5	0.7211	0.91413	22.933	2	NaN	NaN	NaN	0	1.0988	1.0901
D3YTQ3;F6VQH5;Q9Z130	D3YTQ3;F6VQH5;Q9Z130	7;5;5	6;4;4	6;4;4	Heterogeneous nuclear ribonucleoprotein D-like	Hnrpdl	>tr|D3YTQ3|D3YTQ3_MOUSE Heterogeneous nuclear ribonucleoprotein D-like OS=Mus musculus GN=Hnrpdl PE=4 SV=1;>tr|F6VQH5|F6VQH5_MOUSE Heterogeneous nuclear ribonucleoprotein D-like (Fragment) OS=Mus musculus GN=Hnrpdl PE=4 SV=1;>sp|Q9Z130|HNRDL_MOUSE Heteroge	3	7	6	6	5	3	4	4	4	2	3	3	4	2	3	3	18.3	16.4	16.4	46.27	420	420;323;301	6	6	5	6	23	1.0208e-60	0.84941	0.85992	50.672	13	1.1638	1.8625	37.126	4	1.3833	1.6847	9.8534	2	0.82054	0.7933
Q9Z2D8;D3YTR4;D3YTR5;Q9Z2D8-2;F6WZH1;Q9Z2E1;F6UPR7	Q9Z2D8;D3YTR4;D3YTR5;Q9Z2D8-2;F6WZH1	6;6;6;6;5;1;1	6;6;6;6;5;1;1	6;6;6;6;5;1;1	Methyl-CpG-binding domain protein 3	Mbd3	>sp|Q9Z2D8|MBD3_MOUSE Methyl-CpG-binding domain protein 3 OS=Mus musculus GN=Mbd3 PE=1 SV=1;>tr|D3YTR4|D3YTR4_MOUSE Methyl-CpG-binding domain protein 3 OS=Mus musculus GN=Mbd3 PE=4 SV=1;>tr|D3YTR5|D3YTR5_MOUSE Methyl-CpG-binding domain protein 3 OS=Mus mus	7	6	6	6	2	2	4	4	2	2	4	4	2	2	4	4	22.8	22.8	22.8	32.168	285	285;281;261;253;185;414;72	5	4	7	7	23	1.2653e-16	1.3702	1.2329	52.003	22	0.44598	0.62759	15.381	5	0.52356	0.72185	12.374	4	1.885	1.8567
D3YTS1;D3Z569;Q9R0P6;D3YWT0	D3YTS1;D3Z569;Q9R0P6;D3YWT0	10;10;10;10	10;10;10;10	10;10;10;10	Signal peptidase complex catalytic subunit SEC11A	Sec11a	>tr|D3YTS1|D3YTS1_MOUSE Sec11-like 1 (S. cerevisiae), isoform CRA_d OS=Mus musculus GN=Sec11a PE=4 SV=1;>tr|D3Z569|D3Z569_MOUSE Sec11-like 1 (S. cerevisiae), isoform CRA_e OS=Mus musculus GN=Sec11a PE=4 SV=1;>sp|Q9R0P6|SC11A_MOUSE Signal peptidase complex	4	10	10	10	5	7	9	8	5	7	9	8	5	7	9	8	38.9	38.9	38.9	27.931	247	247;190;179;170	9	21	38	22	90	5.684e-86	0.95258	0.9068	38.817	85	1.1167	1.6643	2.6534	8	1.1037	1.6446	10.504	20	0.88321	0.85274
D3YTT6;D3Z194;D3YVF7	D3YTT6;D3Z194	5;5;1	1;1;0	1;1;0	Oxysterol-binding protein	Osbpl3	>tr|D3YTT6|D3YTT6_MOUSE Oxysterol-binding protein OS=Mus musculus GN=Osbpl3 PE=3 SV=1;>tr|D3Z194|D3Z194_MOUSE Oxysterol-binding protein OS=Mus musculus GN=Osbpl3 PE=3 SV=1	3	5	1	1	2	4	3	5	1	1	1	1	1	1	1	1	8.7	2.1	2.1	100.5	886	886;850;144	3	9	2	6	20	1.4393e-80	NaN	NaN	NaN	0	NaN	NaN	NaN	0	NaN	NaN	NaN	0	NaN	NaN
Q3U0K8;Q3U0K8-3;D3YTU2;Q3U0K8-2	Q3U0K8;Q3U0K8-3;D3YTU2;Q3U0K8-2	6;6;6;4	6;6;6;4	6;6;6;4	2-oxoglutarate and iron-dependent oxygenase domain-containing protein 1	Ogfod1	>sp|Q3U0K8|OGFD1_MOUSE 2-oxoglutarate and iron-dependent oxygenase domain-containing protein 1 OS=Mus musculus GN=Ogfod1 PE=2 SV=1;>sp|Q3U0K8-3|OGFD1_MOUSE Isoform 3 of 2-oxoglutarate and iron-dependent oxygenase domain-containing protein 1 OS=Mus musculus	4	6	6	6	1	2	6	1	1	2	6	1	1	2	6	1	24.4	24.4	24.4	62.734	545	545;544;530;502	5	6	10	5	26	1.7934e-177	1.2246	1.1772	30.218	25	0.56114	0.72875	8.5248	5	0.59024	0.76077	7.6851	5	1.4506	1.3252
D3YTV3;Q9DBV3	D3YTV3;Q9DBV3	3;3	3;3	3;3	Probable ATP-dependent RNA helicase DHX34	Dhx34	>tr|D3YTV3|D3YTV3_MOUSE Probable ATP-dependent RNA helicase DHX34 OS=Mus musculus GN=Dhx34 PE=4 SV=1;>sp|Q9DBV3|DHX34_MOUSE Probable ATP-dependent RNA helicase DHX34 OS=Mus musculus GN=Dhx34 PE=2 SV=2	2	3	3	3	0	1	1	2	0	1	1	2	0	1	1	2	3.9	3.9	3.9	128.62	1145	1145;1145		1	1	2	4	1.935e-05	0.60718	0.63409	NaN	1	NaN	NaN	NaN	0	NaN	NaN	NaN	0	0.60718	0.63409
Q9EPQ7;D3YU00	Q9EPQ7;D3YU00	2;2	2;2	2;2	StAR-related lipid transfer protein 5	Stard5	>sp|Q9EPQ7|STAR5_MOUSE StAR-related lipid transfer protein 5 OS=Mus musculus GN=Stard5 PE=2 SV=2;>tr|D3YU00|D3YU00_MOUSE StAR-related lipid transfer (START) domain containing 5, isoform CRA_a OS=Mus musculus GN=Stard5 PE=4 SV=1	2	2	2	2	1	1	1	2	1	1	1	2	1	1	1	2	15.5	15.5	15.5	23.922	213	213;206	2	3	2	3	10	2.1118e-07	0.92457	1.0031	115.6	10	0.15376	0.22492	0.50913	2	0.32512	0.40364	43.983	3	3.1155	2.8769
Q8BUL6;D3YU01;F6YLP9	Q8BUL6;D3YU01;F6YLP9	1;1;1	1;1;1	1;1;1	Pleckstrin homology domain-containing family A member 1	Plekha1	>sp|Q8BUL6|PKHA1_MOUSE Pleckstrin homology domain-containing family A member 1 OS=Mus musculus GN=Plekha1 PE=1 SV=1;>tr|D3YU01|D3YU01_MOUSE Pleckstrin homology domain-containing family A member 1 OS=Mus musculus GN=Plekha1 PE=4 SV=1;>tr|F6YLP9|F6YLP9_MOUSE	3	1	1	1	1	1	1	1	1	1	1	1	1	1	1	1	2.3	2.3	2.3	43.371	383	383;334;155	5	3	4	4	16	0.0015032	NaN	NaN	NaN	0	NaN	NaN	NaN	0	NaN	NaN	NaN	0	NaN	NaN
D3YU05	D3YU05	18	1	1	Glyceraldehyde-3-phosphate dehydrogenase	Gm6316	>tr|D3YU05|D3YU05_MOUSE Glyceraldehyde-3-phosphate dehydrogenase OS=Mus musculus GN=Gm6316 PE=3 SV=1	1	18	1	1	16	15	17	16	0	1	0	1	0	1	0	1	43.4	3.2	3.2	36.541	339	339		1		2	3	0	0.80963	0.81633	33.557	3	NaN	NaN	NaN	0	0.97938	1.4341	NaN	1	NaN	NaN
Q8K2T1;D3YU12;G5E8S7;Q8K2T1-2;Q8K2T1-3	Q8K2T1;D3YU12;G5E8S7;Q8K2T1-2;Q8K2T1-3	14;14;10;10;7	14;14;10;10;7	14;14;10;10;7	NmrA-like family domain-containing protein 1	Nmral1	>sp|Q8K2T1|NMRL1_MOUSE NmrA-like family domain-containing protein 1 OS=Mus musculus GN=Nmral1 PE=1 SV=1;>tr|D3YU12|D3YU12_MOUSE NmrA-like family domain-containing protein 1 OS=Mus musculus GN=Nmral1 PE=4 SV=1;>tr|G5E8S7|G5E8S7_MOUSE NmrA-like family domain	5	14	14	14	7	8	10	7	7	8	10	7	7	8	10	7	55.7	55.7	55.7	34.376	309	309;299;291;243;182	12	16	13	14	55	2.1472e-87	0.91341	0.99967	25.661	55	0.65214	0.94982	18.27	12	0.61751	0.87071	11.634	16	1.2236	1.1666
Q8VCM8;D3YU17	Q8VCM8;D3YU17	19;19	19;19	19;19	Nicalin	Ncln	>sp|Q8VCM8|NCLN_MOUSE Nicalin OS=Mus musculus GN=Ncln PE=2 SV=2;>tr|D3YU17|D3YU17_MOUSE Nicalin OS=Mus musculus GN=Ncln PE=4 SV=1	2	19	19	19	12	9	14	12	12	9	14	12	12	9	14	12	34.1	34.1	34.1	62.907	563	563;562	29	24	33	27	113	3.3012e-82	0.83515	0.77871	52.964	113	1.2318	1.8725	16.185	29	1.1739	1.7387	14.028	24	0.68925	0.6521
Q9WU40-2;D3YU56;Q9WU40;E9QP59	Q9WU40-2;D3YU56;Q9WU40;E9QP59	3;3;3;3	3;3;3;3	3;3;3;3	Inner nuclear membrane protein Man1	Lemd3	>sp|Q9WU40-2|MAN1_MOUSE Isoform 2 of Inner nuclear membrane protein Man1 OS=Mus musculus GN=Lemd3;>tr|D3YU56|D3YU56_MOUSE Inner nuclear membrane protein Man1 OS=Mus musculus GN=Lemd3 PE=4 SV=1;>sp|Q9WU40|MAN1_MOUSE Inner nuclear membrane protein Man1 OS=Mu	4	3	3	3	1	1	2	2	1	1	2	2	1	1	2	2	5.2	5.2	5.2	102.74	943	943;940;921;918	5	3	4	6	18	1.3984e-10	1.1082	1.3065	54.46	16	1.2893	1.6895	7.4895	5	1.4611	1.7429	7.1058	3	0.52439	0.54686
Q9WVM3;D3YU58	Q9WVM3;D3YU58	7;7	7;7	7;7	Anaphase-promoting complex subunit 7	Anapc7	>sp|Q9WVM3|APC7_MOUSE Anaphase-promoting complex subunit 7 OS=Mus musculus GN=Anapc7 PE=2 SV=3;>tr|D3YU58|D3YU58_MOUSE Anaphase-promoting complex subunit 7 OS=Mus musculus GN=Anapc7 PE=4 SV=1	2	7	7	7	0	2	7	1	0	2	7	1	0	2	7	1	20	20	20	63.02	565	565;503		2	10	1	13	7.3126e-33	0.99481	0.98882	79.952	13	NaN	NaN	NaN	0	1.0321	1.3529	0.91629	2	0.93465	0.85315
P49025-5;D3YU89;E9QL53;P49025;D3Z1U0;P49025-4;F6SBR5;P49025-3	P49025-5;D3YU89;E9QL53;P49025;D3Z1U0;P49025-4;F6SBR5;P49025-3	8;8;8;8;8;8;8;8	8;8;8;8;8;8;8;8	8;8;8;8;8;8;8;8	Citron Rho-interacting kinase	Cit	>sp|P49025-5|CTRO_MOUSE Isoform 5 of Citron Rho-interacting kinase OS=Mus musculus GN=Cit;>tr|D3YU89|D3YU89_MOUSE Citron Rho-interacting kinase OS=Mus musculus GN=Cit PE=4 SV=1;>tr|E9QL53|E9QL53_MOUSE Citron Rho-interacting kinase OS=Mus musculus GN=Cit PE	8	8	8	8	3	3	3	2	3	3	3	2	3	3	3	2	4.4	4.4	4.4	238.84	2085	2085;2070;2055;2055;2028;2012;1642;1597	16	6	5	6	33	2.227e-17	1.2648	1.3574	35.002	4	0.66558	0.75697	NaN	1	1.1755	1.3831	NaN	1	1.6605	1.7197
D3YUC9	D3YUC9	4	1	1		Msrb3	>tr|D3YUC9|D3YUC9_MOUSE Methionine-R-sulfoxide reductase B3, mitochondrial OS=Mus musculus GN=Msrb3 PE=4 SV=1	1	4	1	1	1	1	4	1	1	1	1	1	1	1	1	1	53.5	9.6	9.6	12.058	114	114	4	5	4	4	17	5.7605e-60	NaN	NaN	NaN	0	NaN	NaN	NaN	0	NaN	NaN	NaN	0	NaN	NaN
Q69Z89;D3YWJ9;Q69Z89-5;Q69Z89-2;Q69Z89-4;D3YUE9	Q69Z89;D3YWJ9;Q69Z89-5;Q69Z89-2;Q69Z89-4;D3YUE9	1;1;1;1;1;1	1;1;1;1;1;1	1;1;1;1;1;1	Ras-associating and dilute domain-containing protein	Radil	>sp|Q69Z89|RADIL_MOUSE Ras-associating and dilute domain-containing protein OS=Mus musculus GN=Radil PE=1 SV=2;>tr|D3YWJ9|D3YWJ9_MOUSE Ras-associating and dilute domain-containing protein OS=Mus musculus GN=Radil PE=4 SV=1;>sp|Q69Z89-5|RADIL_MOUSE Isoform	6	1	1	1	1	1	1	1	1	1	1	1	1	1	1	1	1.5	1.5	1.5	120.35	1099	1099;1093;1070;1050;475;80	5	4	4	3	16	8.6019e-55	NaN	NaN	NaN	0	NaN	NaN	NaN	0	NaN	NaN	NaN	0	NaN	NaN
E9PXE2;E9QPM7;Q64096;E9PXE1;G3UX72;E9PY12;E9PY13;E9Q863;G3UXP9;D3YUF4;D3YUF3;F6VR53;F6WPM5;F7BZ65;F6ZFQ8	E9PXE2;E9QPM7;Q64096;E9PXE1;G3UX72;E9PY12;E9PY13;E9Q863;G3UXP9;D3YUF4;D3YUF3;F6VR53;F6WPM5;F7BZ65;F6ZFQ8	1;1;1;1;1;1;1;1;1;1;1;1;1;1;1	1;1;1;1;1;1;1;1;1;1;1;1;1;1;1	1;1;1;1;1;1;1;1;1;1;1;1;1;1;1	Guanine nucleotide exchange factor DBS	Mcf2l	>tr|E9PXE2|E9PXE2_MOUSE Guanine nucleotide exchange factor DBS OS=Mus musculus GN=Mcf2l PE=4 SV=1;>tr|E9QPM7|E9QPM7_MOUSE Guanine nucleotide exchange factor DBS OS=Mus musculus GN=Mcf2l PE=4 SV=1;>sp|Q64096|MCF2L_MOUSE Guanine nucleotide exchange factor DB	15	1	1	1	0	0	1	0	0	0	1	0	0	0	1	0	1.7	1.7	1.7	132.39	1175	1175;1149;1149;1125;1118;1101;1097;1067;1059;1046;866;807;295;254;151			3		3	0.0011474	NaN	NaN	NaN	0	NaN	NaN	NaN	0	NaN	NaN	NaN	0	NaN	NaN
Q8K4J6;Q8K4J6-2;D3YUI2;D3YUG5	Q8K4J6;Q8K4J6-2;D3YUI2;D3YUG5	5;5;5;5	5;5;5;5	5;5;5;5	MKL/myocardin-like protein 1	Mkl1	>sp|Q8K4J6|MKL1_MOUSE MKL/myocardin-like protein 1 OS=Mus musculus GN=Mkl1 PE=1 SV=2;>sp|Q8K4J6-2|MKL1_MOUSE Isoform 2 of MKL/myocardin-like protein 1 OS=Mus musculus GN=Mkl1;>tr|D3YUI2|D3YUI2_MOUSE MKL/myocardin-like protein 1 OS=Mus musculus GN=Mkl1 PE=4	4	5	5	5	4	4	5	4	4	4	5	4	4	4	5	4	5.3	5.3	5.3	102.54	964	964;929;879;705	26	22	27	28	103	4.8406e-58	0.88105	0.84174	NaN	1	NaN	NaN	NaN	0	NaN	NaN	NaN	0	0.88105	0.84174
Q6IFT4;D3YUH8;Q6IFT4-2	Q6IFT4;D3YUH8;Q6IFT4-2	2;2;1	2;2;1	2;2;1	Rho GTPase-activating protein 20	Arhgap20	>sp|Q6IFT4|RHG20_MOUSE Rho GTPase-activating protein 20 OS=Mus musculus GN=Arhgap20 PE=2 SV=1;>tr|D3YUH8|D3YUH8_MOUSE Rho GTPase-activating protein 20 OS=Mus musculus GN=Arhgap20 PE=4 SV=1;>sp|Q6IFT4-2|RHG20_MOUSE Isoform 2 of Rho GTPase-activating protein	3	2	2	2	2	1	1	1	2	1	1	1	2	1	1	1	1.6	1.6	1.6	131.37	1182	1182;1146;217	7	3	1	3	14	1.0184e-05	NaN	NaN	NaN	0	NaN	NaN	NaN	0	NaN	NaN	NaN	0	NaN	NaN
Q61161;D3YUH9	Q61161;D3YUH9	1;1	1;1	1;1	Mitogen-activated protein kinase kinase kinase kinase 2	Map4k2	>sp|Q61161|M4K2_MOUSE Mitogen-activated protein kinase kinase kinase kinase 2 OS=Mus musculus GN=Map4k2 PE=1 SV=1;>tr|D3YUH9|D3YUH9_MOUSE Mitogen-activated protein kinase kinase kinase kinase 2 (Fragment) OS=Mus musculus GN=Map4k2 PE=4 SV=1	2	1	1	1	1	1	0	1	1	1	0	1	1	1	0	1	1.3	1.3	1.3	91.264	821	821;351	2	5		1	8	0.0027133	NaN	NaN	NaN	0	NaN	NaN	NaN	0	NaN	NaN	NaN	0	NaN	NaN
D3YUJ3;E9Q226	D3YUJ3;E9Q226	5;5	4;4	4;4		Ccnyl1	>tr|D3YUJ3|D3YUJ3_MOUSE Protein Ccnyl1 OS=Mus musculus GN=Ccnyl1 PE=3 SV=1;>tr|E9Q226|E9Q226_MOUSE Protein Ccnyl1 OS=Mus musculus GN=Ccnyl1 PE=3 SV=1	2	5	4	4	2	3	5	3	1	2	4	2	1	2	4	2	9.8	7.6	7.6	41.6	367	367;291	24	21	23	25	93	2.2949e-88	NaN	NaN	NaN	0	NaN	NaN	NaN	0	NaN	NaN	NaN	0	NaN	NaN
Q91YT0;D3YUM1;D3Z1U9;D3Z0K1;D3YXX5;D6RG60	Q91YT0;D3YUM1;D3Z1U9;D3Z0K1	12;12;10;6;4;2	12;12;10;6;4;2	12;12;10;6;4;2	NADH dehydrogenase [ubiquinone] flavoprotein 1, mitochondrial	Ndufv1	>sp|Q91YT0|NDUV1_MOUSE NADH dehydrogenase [ubiquinone] flavoprotein 1, mitochondrial OS=Mus musculus GN=Ndufv1 PE=1 SV=1;>tr|D3YUM1|D3YUM1_MOUSE NADH dehydrogenase [ubiquinone] flavoprotein 1, mitochondrial OS=Mus musculus GN=Ndufv1 PE=4 SV=1;>tr|D3Z1U9|D3	6	12	12	12	4	2	6	9	4	2	6	9	4	2	6	9	40.5	40.5	40.5	50.834	464	464;455;385;146;115;120	7	2	8	15	32	1.7414e-103	1.2598	1.1619	30.937	32	0.60598	0.97279	13.11	7	0.74104	1.0915	4.5705	2	1.348	1.2367
D3YUP1;Q9WVG6;Q9WVG6-2;D6RFA7	D3YUP1;Q9WVG6;Q9WVG6-2	14;14;14;2	14;14;14;2	14;14;14;2	Histone-arginine methyltransferase CARM1	Carm1	>tr|D3YUP1|D3YUP1_MOUSE Histone-arginine methyltransferase CARM1 OS=Mus musculus GN=Carm1 PE=4 SV=1;>sp|Q9WVG6|CARM1_MOUSE Histone-arginine methyltransferase CARM1 OS=Mus musculus GN=Carm1 PE=1 SV=2;>sp|Q9WVG6-2|CARM1_MOUSE Isoform 2 of Histone-arginine me	4	14	14	14	5	7	12	12	5	7	12	12	5	7	12	12	27.2	27.2	27.2	70.322	651	651;608;585;162	15	12	22	21	70	1.7446e-133	1.1905	1.0975	31.077	67	0.4508	0.74763	37.143	15	0.56676	0.79376	29.536	11	1.3024	1.1874
E9PW37;E9PYD8;D3YUS5	E9PW37;E9PYD8;D3YUS5	4;4;4	4;4;4	4;4;4		Rasal2	>tr|E9PW37|E9PW37_MOUSE Protein Rasal2 OS=Mus musculus GN=Rasal2 PE=4 SV=1;>tr|E9PYD8|E9PYD8_MOUSE Protein Rasal2 OS=Mus musculus GN=Rasal2 PE=4 SV=1;>tr|D3YUS5|D3YUS5_MOUSE Protein Rasal2 OS=Mus musculus GN=Rasal2 PE=4 SV=1	3	4	4	4	0	2	2	1	0	2	2	1	0	2	2	1	3.7	3.7	3.7	144.59	1286	1286;1268;1261		3	2	1	6	1.0036e-08	0.47212	0.5889	NaN	1	NaN	NaN	NaN	0	0.47212	0.5889	NaN	1	NaN	NaN
D3YUV1	D3YUV1	16	16	1		Nrbp1	>tr|D3YUV1|D3YUV1_MOUSE Nuclear receptor-binding protein OS=Mus musculus GN=Nrbp1 PE=4 SV=1	1	16	16	1	8	7	12	10	8	7	12	10	0	1	0	1	35.5	35.5	1.3	60.85	543	543	27	11	35	26	99	1.7863e-193	1.2228	1.1395	34.289	53	0.50374	0.75195	21.429	12	0.53132	0.74152	37.563	9	1.3621	1.2533
Q8BZH4;Q0VGT3;D3YUX1;D3YUW8	Q8BZH4;Q0VGT3;D3YUX1;D3YUW8	3;3;3;3	3;3;3;3	3;3;3;3	Pogo transposable element with ZNF domain	Pogz	>sp|Q8BZH4|POGZ_MOUSE Pogo transposable element with ZNF domain OS=Mus musculus GN=Pogz PE=1 SV=2;>tr|Q0VGT3|Q0VGT3_MOUSE Pogo transposable element with ZNF domain OS=Mus musculus GN=Pogz PE=2 SV=1;>tr|D3YUX1|D3YUX1_MOUSE Pogo transposable element with ZNF	4	3	3	3	2	1	1	2	2	1	1	2	2	1	1	2	3.1	3.1	3.1	154.91	1409	1409;1400;1356;1314	2	4	2	8	16	4.4669e-09	0.8439	1.2247	NaN	1	0.8439	1.2247	NaN	1	NaN	NaN	NaN	0	NaN	NaN
Q8VBX6-3;Q8VBX6-4;D3YUX2;Q8VBX6;Q8VBX6-2;A3KG81;A3KG84;F7D0H8;A3KG80;A3KG82;Q8VBX6-5	Q8VBX6-3;Q8VBX6-4;D3YUX2;Q8VBX6;Q8VBX6-2;A3KG81	10;10;10;10;10;5;2;2;2;2;1	10;10;10;10;10;5;2;2;2;2;1	10;10;10;10;10;5;2;2;2;2;1	Multiple PDZ domain protein	Mpdz	>sp|Q8VBX6-3|MPDZ_MOUSE Isoform 3 of Multiple PDZ domain protein OS=Mus musculus GN=Mpdz;>sp|Q8VBX6-4|MPDZ_MOUSE Isoform 4 of Multiple PDZ domain protein OS=Mus musculus GN=Mpdz;>tr|D3YUX2|D3YUX2_MOUSE Multiple PDZ domain protein OS=Mus musculus GN=Mpdz PE	11	10	10	10	4	4	5	4	4	4	5	4	4	4	5	4	6.9	6.9	6.9	220.48	2072	2072;2057;2056;2055;2022;1015;495;241;147;138;87	7	8	11	20	46	1.736e-102	0.70553	0.88446	56.57	6	0.51918	0.55209	NaN	1	0.70553	0.88446	56.025	4	NaN	NaN
Q0VEE6;D3YV79	Q0VEE6;D3YV79	3;3	3;3	3;3	Zinc finger protein 800	Znf800;Zfp800	>sp|Q0VEE6|ZN800_MOUSE Zinc finger protein 800 OS=Mus musculus GN=Znf800 PE=1 SV=1;>tr|D3YV79|D3YV79_MOUSE Protein Zfp800 (Fragment) OS=Mus musculus GN=Zfp800 PE=4 SV=1	2	3	3	3	3	0	2	2	3	0	2	2	3	0	2	2	3.6	3.6	3.6	74.812	662	662;469	5		3	3	11	8.8563e-15	NaN	NaN	NaN	0	NaN	NaN	NaN	0	NaN	NaN	NaN	0	NaN	NaN
Q9JJ78;D3YVF2	Q9JJ78;D3YVF2	5;5	5;5	5;5	Lymphokine-activated killer T-cell-originated protein kinase	Pbk	>sp|Q9JJ78|TOPK_MOUSE Lymphokine-activated killer T-cell-originated protein kinase OS=Mus musculus GN=Pbk PE=2 SV=1;>tr|D3YVF2|D3YVF2_MOUSE Lymphokine-activated killer T-cell-originated protein kinase (Fragment) OS=Mus musculus GN=Pbk PE=4 SV=1	2	5	5	5	3	1	4	2	3	1	4	2	3	1	4	2	18.8	18.8	18.8	36.744	330	330;120	6	2	8	4	20	3.8745e-36	1.2268	1.1251	32.63	7	0.40664	0.61551	2.8409	2	NaN	NaN	NaN	0	1.2391	1.176
Q9D9M2;P62069;D3YVU0;D3YVJ5	Q9D9M2;P62069;D3YVU0;D3YVJ5	1;1;1;1	1;1;1;1	1;1;1;1	Ubiquitin carboxyl-terminal hydrolase 12;Ubiquitin carboxyl-terminal hydrolase 46	Usp12;Usp46	>sp|Q9D9M2|UBP12_MOUSE Ubiquitin carboxyl-terminal hydrolase 12 OS=Mus musculus GN=Usp12 PE=2 SV=2;>sp|P62069|UBP46_MOUSE Ubiquitin carboxyl-terminal hydrolase 46 OS=Mus musculus GN=Usp46 PE=1 SV=1;>tr|D3YVU0|D3YVU0_MOUSE Ubiquitin carboxyl-terminal hydrol	4	1	1	1	0	0	1	1	0	0	1	1	0	0	1	1	5.4	5.4	5.4	42.913	370	370;366;339;122			1	1	2	0.00010317	0.8236	0.83203	0.21365	2	NaN	NaN	NaN	0	NaN	NaN	NaN	0	0.86628	0.83329
Q9QY73;D3YVM2	Q9QY73;D3YVM2	5;5	5;5	5;5	Transmembrane protein 59	Tmem59	>sp|Q9QY73|TMM59_MOUSE Transmembrane protein 59 OS=Mus musculus GN=Tmem59 PE=1 SV=2;>tr|D3YVM2|D3YVM2_MOUSE Transmembrane protein 59 OS=Mus musculus GN=Tmem59 PE=4 SV=1	2	5	5	5	1	2	3	3	1	2	3	3	1	2	3	3	23.5	23.5	23.5	36.313	323	323;256	1	2	3	5	11	1.1766e-22	0.44791	0.4167	131.25	11	3.1637	4.0264	NaN	1	3.8673	5.6217	15.526	2	0.45425	0.4211
O55102;D3YVM8;D3Z4L7	O55102;D3YVM8	3;3;1	3;3;1	3;3;1	Biogenesis of lysosome-related organelles complex 1 subunit 1	Bloc1s1	>sp|O55102|BL1S1_MOUSE Biogenesis of lysosome-related organelles complex 1 subunit 1 OS=Mus musculus GN=Bloc1s1 PE=1 SV=2;>tr|D3YVM8|D3YVM8_MOUSE Biogenesis of lysosome-related organelles complex 1 subunit 1 OS=Mus musculus GN=Bloc1s1 PE=4 SV=1	3	3	3	3	0	3	0	3	0	3	0	3	0	3	0	3	25.6	25.6	25.6	14.281	125	125;121;94		6		7	13	6.9889e-10	0.78047	0.74409	64.605	13	NaN	NaN	NaN	0	1.4712	2.0874	21.833	6	NaN	NaN
D3YVN7;Q8BFR5;Q8BFR5-2	D3YVN7;Q8BFR5;Q8BFR5-2	27;27;23	27;27;23	27;27;23	Elongation factor Tu;Elongation factor Tu, mitochondrial	Gm9755;Tufm	>tr|D3YVN7|D3YVN7_MOUSE Elongation factor Tu OS=Mus musculus GN=Gm9755 PE=3 SV=1;>sp|Q8BFR5|EFTU_MOUSE Elongation factor Tu, mitochondrial OS=Mus musculus GN=Tufm PE=1 SV=1;>sp|Q8BFR5-2|EFTU_MOUSE Isoform 2 of Elongation factor Tu, mitochondrial OS=Mus mus	3	27	27	27	19	16	24	15	19	16	24	15	19	16	24	15	63.9	63.9	63.9	49.538	452	452;452;435	51	44	57	36	188	1.8723e-297	0.821	1.0001	82.246	183	0.99781	1.5631	76.81	49	0.9584	1.2437	41.155	42	0.63151	0.62243
Q8C5W3-2;Q8C5W3;D3YVP4	Q8C5W3-2;Q8C5W3;D3YVP4	4;4;4	4;4;4	4;4;4	Tubulin-specific chaperone cofactor E-like protein	Tbcel	>sp|Q8C5W3-2|TBCEL_MOUSE Isoform 2 of Tubulin-specific chaperone cofactor E-like protein OS=Mus musculus GN=Tbcel;>sp|Q8C5W3|TBCEL_MOUSE Tubulin-specific chaperone cofactor E-like protein OS=Mus musculus GN=Tbcel PE=1 SV=1;>tr|D3YVP4|D3YVP4_MOUSE Tubulin-s	3	4	4	4	1	3	2	2	1	3	2	2	1	3	2	2	4.8	4.8	4.8	49.923	442	442;424;68	1	5	5	4	15	8.4725e-10	NaN	NaN	NaN	0	NaN	NaN	NaN	0	NaN	NaN	NaN	0	NaN	NaN
G5E860;Q99LG0;D3YVU1	G5E860;Q99LG0;D3YVU1	1;1;1	1;1;1	1;1;1	Ubiquitin carboxyl-terminal hydrolase;Ubiquitin carboxyl-terminal hydrolase 16	Usp16	>tr|G5E860|G5E860_MOUSE Ubiquitin carboxyl-terminal hydrolase OS=Mus musculus GN=Usp16 PE=3 SV=1;>sp|Q99LG0|UBP16_MOUSE Ubiquitin carboxyl-terminal hydrolase 16 OS=Mus musculus GN=Usp16 PE=1 SV=1;>tr|D3YVU1|D3YVU1_MOUSE Ubiquitin carboxyl-terminal hydrolas	3	1	1	1	0	0	1	1	0	0	1	1	0	0	1	1	1.7	1.7	1.7	93.433	825	825;825;754			1	2	3	0.00114	NaN	NaN	NaN	0	NaN	NaN	NaN	0	NaN	NaN	NaN	0	NaN	NaN
Q6P1G2;E9QL25;D3YVU4;D3YVU7;Q6P1G2-2;Q6P1G2-3;D3YUE3;D3YV31	Q6P1G2;E9QL25;D3YVU4;D3YVU7;Q6P1G2-2;Q6P1G2-3	3;3;3;3;2;2;1;1	3;3;3;3;2;2;1;1	3;3;3;3;2;2;1;1	Lysine-specific demethylase 2B	Kdm2b	>sp|Q6P1G2|KDM2B_MOUSE Lysine-specific demethylase 2B OS=Mus musculus GN=Kdm2b PE=1 SV=1;>tr|E9QL25|E9QL25_MOUSE Lysine-specific demethylase 2B OS=Mus musculus GN=Kdm2b PE=4 SV=1;>tr|D3YVU4|D3YVU4_MOUSE Lysine-specific demethylase 2B OS=Mus musculus GN=Kdm	8	3	3	3	1	0	1	2	1	0	1	2	1	0	1	2	2.4	2.4	2.4	149.73	1309	1309;1303;1271;1254;776;656;514;286	1		1	2	4	3.4547e-06	1.023	1.1312	56.199	2	0.54786	0.76023	NaN	1	NaN	NaN	NaN	0	NaN	NaN
E9Q1U2;D3YVV9;Q91YE8;Q91YE8-2	E9Q1U2;D3YVV9;Q91YE8;Q91YE8-2	2;2;2;1	2;2;2;1	2;2;2;1	Synaptopodin-2	Synpo2	>tr|E9Q1U2|E9Q1U2_MOUSE Synaptopodin-2 OS=Mus musculus GN=Synpo2 PE=4 SV=1;>tr|D3YVV9|D3YVV9_MOUSE Synaptopodin-2 OS=Mus musculus GN=Synpo2 PE=4 SV=1;>sp|Q91YE8|SYNP2_MOUSE Synaptopodin-2 OS=Mus musculus GN=Synpo2 PE=1 SV=2;>sp|Q91YE8-2|SYNP2_MOUSE Isoform	4	2	2	2	1	1	2	1	1	1	2	1	1	1	2	1	2.1	2.1	2.1	135.76	1257	1257;1198;1087;757	6	3	9	1	19	1.7441e-12	NaN	NaN	NaN	0	NaN	NaN	NaN	0	NaN	NaN	NaN	0	NaN	NaN
D3YVW2;Q8BXA1;F6RUD1	D3YVW2;Q8BXA1	18;16;2	18;16;2	18;16;2	Golgi integral membrane protein 4	Golim4	>tr|D3YVW2|D3YVW2_MOUSE Golgi integral membrane protein 4 OS=Mus musculus GN=Golim4 PE=4 SV=1;>sp|Q8BXA1|GOLI4_MOUSE Golgi integral membrane protein 4 OS=Mus musculus GN=Golim4 PE=1 SV=1	3	18	18	18	12	6	15	13	12	6	15	13	12	6	15	13	34.3	34.3	34.3	79.904	683	683;655;144	23	12	31	26	92	0	0.50757	0.47151	94.499	73	2.4164	3.362	32.128	18	1.8155	2.3939	42.448	8	0.42974	0.41355
D3YVY9;Q14AI0	D3YVY9;Q14AI0	2;2	2;2	2;2	Sister chromatid cohesion protein DCC1	Dscc1;DSCC1	>tr|D3YVY9|D3YVY9_MOUSE Protein Dscc1 OS=Mus musculus GN=Dscc1 PE=4 SV=1;>sp|Q14AI0|DCC1_MOUSE Sister chromatid cohesion protein DCC1 OS=Mus musculus GN=DSCC1 PE=2 SV=1	2	2	2	2	0	1	1	0	0	1	1	0	0	1	1	0	4.8	4.8	4.8	52.071	462	462;399		2	1		3	4.0921e-09	0.9203	1.021	44.47	2	NaN	NaN	NaN	0	0.59161	0.7455	NaN	1	1.4316	1.3982
P58059;D3YVZ9	P58059;D3YVZ9	1;1	1;1	1;1	28S ribosomal protein S21, mitochondrial	Mrps21	>sp|P58059|RT21_MOUSE 28S ribosomal protein S21, mitochondrial OS=Mus musculus GN=Mrps21 PE=2 SV=1;>tr|D3YVZ9|D3YVZ9_MOUSE 28S ribosomal protein S21, mitochondrial (Fragment) OS=Mus musculus GN=Mrps21 PE=4 SV=1	2	1	1	1	0	1	0	1	0	1	0	1	0	1	0	1	14.9	14.9	14.9	10.561	87	87;44		2		2	4	7.5991e-10	0.86126	1.0156	37.485	4	NaN	NaN	NaN	0	0.95727	1.4125	4.7233	2	NaN	NaN
I1E4X5;Q8BWQ6;D3YW19;D3YW20;Q8BWQ6-3;Q8BWQ6-2;H3BJE8;F6RR19	I1E4X5;Q8BWQ6;D3YW19;D3YW20;Q8BWQ6-3	22;22;22;19;17;10;4;4	22;22;22;19;17;10;4;4	22;22;22;19;17;10;4;4	UPF0505 protein C16orf62 homolog	9030624J02Rik	>tr|I1E4X5|I1E4X5_MOUSE Protein 9030624J02Rik OS=Mus musculus GN=9030624J02Rik PE=4 SV=1;>sp|Q8BWQ6|CP062_MOUSE UPF0505 protein C16orf62 homolog OS=Mus musculus PE=2 SV=2;>tr|D3YW19|D3YW19_MOUSE Protein 9030624J02Rik (Fragment) OS=Mus musculus GN=9030624J0	8	22	22	22	12	5	15	13	12	5	15	13	12	5	15	13	33.6	33.6	33.6	111.98	991	991;963;940;874;728;434;245;203	21	8	24	20	73	1.0436e-85	0.85098	0.8409	54.665	72	0.98383	1.3436	33.54	21	0.98403	1.3043	9.1739	7	0.74095	0.6881
D3YW41;Q6ZWZ4;D3Z3R1;D3Z7M8;P47964;D3YX71	D3YW41;Q6ZWZ4;D3Z3R1;D3Z7M8;P47964	6;6;6;5;3;2	6;6;6;5;3;2	6;6;6;5;3;2	60S ribosomal protein L36	Rpl36-ps3;Rpl36;Gm5745;Gm5614	>tr|D3YW41|D3YW41_MOUSE 60S ribosomal protein L36 OS=Mus musculus GN=Rpl36-ps3 PE=3 SV=1;>tr|Q6ZWZ4|Q6ZWZ4_MOUSE 60S ribosomal protein L36 OS=Mus musculus GN=Rpl36 PE=3 SV=1;>tr|D3Z3R1|D3Z3R1_MOUSE 60S ribosomal protein L36 OS=Mus musculus GN=Gm5745 PE=3 S	6	6	6	6	6	5	6	6	6	5	6	6	6	5	6	6	37.1	37.1	37.1	12.256	105	105;105;104;105;105;104	50	29	51	30	160	2.7616e-158	0.91639	0.99584	24.043	158	0.63877	0.94441	33.74	48	0.63964	0.96743	18.79	29	1.0702	1.0363
D3YW48	D3YW48	15	15	1		Capns1	>tr|D3YW48|D3YW48_MOUSE Calpain small subunit 1 (Fragment) OS=Mus musculus GN=Capns1 PE=4 SV=1	1	15	15	1	10	12	12	11	10	12	12	11	1	0	1	0	93.4	93.4	21.2	25.31	241	241	61	53	112	62	288	0	0.82708	0.80521	76.781	251	0.42386	0.64843	103.47	55	0.42622	0.61126	58.366	50	1.4222	1.2834
D3YW52;Q61838	D3YW52;Q61838	3;3	2;2	2;2	Alpha-2-macroglobulin;Alpha-2-macroglobulin 165 kDa subunit;Alpha-2-macroglobulin 35 kDa subunit	Pzp;A2m	>tr|D3YW52|D3YW52_MOUSE Protein Pzp OS=Mus musculus GN=Pzp PE=4 SV=1;>sp|Q61838|A2M_MOUSE Alpha-2-macroglobulin OS=Mus musculus GN=A2m PE=1 SV=3	2	3	2	2	1	3	3	3	0	2	2	2	0	2	2	2	1.7	1.2	1.2	167.28	1507	1507;1495		4	4	5	13	2.7964e-08	0.081892	0.079751	82.824	11	NaN	NaN	NaN	0	0.13115	0.19675	32.392	2	0.050046	0.046931
Q9CWT3;D3YW62;D3Z4P6	Q9CWT3;D3YW62;D3Z4P6	1;1;1	1;1;1	1;1;1	Sorting nexin-10	Snx10	>sp|Q9CWT3|SNX10_MOUSE Sorting nexin-10 OS=Mus musculus GN=Snx10 PE=2 SV=1;>tr|D3YW62|D3YW62_MOUSE Sorting nexin-10 (Fragment) OS=Mus musculus GN=Snx10 PE=4 SV=1;>tr|D3Z4P6|D3Z4P6_MOUSE Sorting nexin-10 (Fragment) OS=Mus musculus GN=Snx10 PE=4 SV=1	3	1	1	1	0	0	1	0	0	0	1	0	0	0	1	0	8	8	8	23.542	201	201;177;96			2		2	9.1614e-05	1.6137	1.5646	5.6429	2	NaN	NaN	NaN	0	NaN	NaN	NaN	0	1.6137	1.5646
Q8R1S0;D3YW66;D6RG57;F6ZE40	Q8R1S0;D3YW66;D6RG57;F6ZE40	2;2;1;1	2;2;1;1	2;2;1;1	Ubiquinone biosynthesis monooxygenase COQ6	Coq6	>sp|Q8R1S0|COQ6_MOUSE Ubiquinone biosynthesis monooxygenase COQ6 OS=Mus musculus GN=Coq6 PE=2 SV=3;>tr|D3YW66|D3YW66_MOUSE Ubiquinone biosynthesis monooxygenase COQ6 OS=Mus musculus GN=Coq6 PE=4 SV=1;>tr|D6RG57|D6RG57_MOUSE Ubiquinone biosynthesis monooxyg	4	2	2	2	1	1	2	1	1	1	2	1	1	1	2	1	4	4	4	51.392	476	476;432;282;200	10	2	4	4	20	3.2961e-05	0.68168	0.86782	55.328	20	0.67917	0.87439	26.997	10	0.53255	0.6662	8.728	2	0.39479	0.40592
Q9JM93;D3Z6F1;D3YWC2	Q9JM93;D3Z6F1;D3YWC2	1;1;1	1;1;1	1;1;1	ADP-ribosylation factor-like protein 6-interacting protein 4	Arl6ip4	>sp|Q9JM93|AR6P4_MOUSE ADP-ribosylation factor-like protein 6-interacting protein 4 OS=Mus musculus GN=Arl6ip4 PE=1 SV=1;>tr|D3Z6F1|D3Z6F1_MOUSE ADP-ribosylation factor-like protein 6-interacting protein 4 (Fragment) OS=Mus musculus GN=Arl6ip4 PE=4 SV=1;>t	3	1	1	1	1	1	1	1	1	1	1	1	1	1	1	1	7	7	7	25.524	229	229;227;200	4	4	2	4	14	2.2874e-102	NaN	NaN	NaN	0	NaN	NaN	NaN	0	NaN	NaN	NaN	0	NaN	NaN
Q6P9S0;D3YWC9;F7D291	Q6P9S0;D3YWC9;F7D291	2;2;1	2;2;1	2;2;1	MTSS1-like protein	Mtss1l	>sp|Q6P9S0|MTSSL_MOUSE MTSS1-like protein OS=Mus musculus GN=Mtss1l PE=1 SV=1;>tr|D3YWC9|D3YWC9_MOUSE MTSS1-like protein OS=Mus musculus GN=Mtss1l PE=4 SV=1;>tr|F7D291|F7D291_MOUSE MTSS1-like protein (Fragment) OS=Mus musculus GN=Mtss1l PE=4 SV=1	3	2	2	2	1	1	0	1	1	1	0	1	1	1	0	1	3.6	3.6	3.6	76.843	715	715;653;364	1	8		1	10	4.843e-06	NaN	NaN	NaN	0	NaN	NaN	NaN	0	NaN	NaN	NaN	0	NaN	NaN
D3YWE6	D3YWE6	2	2	2		Mn1	>tr|D3YWE6|D3YWE6_MOUSE Protein Mn1 OS=Mus musculus GN=Mn1 PE=4 SV=1	1	2	2	2	1	2	1	0	1	2	1	0	1	2	1	0	1.7	1.7	1.7	134.07	1297	1297	2	4	1		7	1.9841e-05	NaN	NaN	NaN	0	NaN	NaN	NaN	0	NaN	NaN	NaN	0	NaN	NaN
D3YWJ4;Q8K2I1	D3YWJ4;Q8K2I1	4;4	4;4	4;4	Protein farnesyltransferase subunit beta	Fntb	>tr|D3YWJ4|D3YWJ4_MOUSE Protein farnesyltransferase subunit beta OS=Mus musculus GN=Fntb PE=4 SV=1;>sp|Q8K2I1|FNTB_MOUSE Protein farnesyltransferase subunit beta OS=Mus musculus GN=Fntb PE=1 SV=1	2	4	4	4	1	3	3	3	1	3	3	3	1	3	3	3	11.9	11.9	11.9	52.784	471	471;437	1	5	5	4	15	3.4063e-13	1.1809	1.1157	43.971	14	0.43638	0.61373	NaN	1	0.67385	0.83593	14.805	5	1.4079	1.3537
Q9CRC9;D3YWR1;Q9CRC9-2;G3UXF5;D6RCJ1	Q9CRC9;D3YWR1;Q9CRC9-2;G3UXF5	8;8;7;6;1	6;6;5;5;1	6;6;5;5;1	Glucosamine-6-phosphate isomerase 2	Gnpda2	>sp|Q9CRC9|GNPI2_MOUSE Glucosamine-6-phosphate isomerase 2 OS=Mus musculus GN=Gnpda2 PE=2 SV=1;>tr|D3YWR1|D3YWR1_MOUSE Glucosamine-6-phosphate isomerase 2 OS=Mus musculus GN=Gnpda2 PE=3 SV=1;>sp|Q9CRC9-2|GNPI2_MOUSE Isoform 2 of Glucosamine-6-phosphate iso	5	8	6	6	5	3	8	5	4	2	6	4	4	2	6	4	48.9	40.6	40.6	31.083	276	276;270;274;180;48	8	4	11	6	29	1.9756e-116	0.70847	0.61881	42.833	29	0.83709	1.2619	7.9331	8	0.86269	1.2125	6.6307	4	0.63966	0.56872
D3Z3N4;D3YWT1;D3Z6Y3	D3Z3N4;D3YWT1;D3Z6Y3	2;2;1	2;2;1	2;2;1		Hnrnph3	>tr|D3Z3N4|D3Z3N4_MOUSE MCG11326, isoform CRA_a OS=Mus musculus GN=Hnrnph3 PE=4 SV=1;>tr|D3YWT1|D3YWT1_MOUSE MCG11326, isoform CRA_b OS=Mus musculus GN=Hnrnph3 PE=4 SV=1;>tr|D3Z6Y3|D3Z6Y3_MOUSE Protein Hnrnph3 OS=Mus musculus GN=Hnrnph3 PE=4 SV=1	3	2	2	2	1	0	1	0	1	0	1	0	1	0	1	0	8.7	8.7	8.7	36.869	346	346;331;71	4		1		5	2.2215e-07	1.3262	1.8323	60.265	5	1.4608	1.9892	12.641	4	NaN	NaN	NaN	0	0.51247	0.5191
E9Q0V4;E9PXT1;P63030;D3Z5S0;D3YWY6;D3Z786	E9Q0V4;E9PXT1;P63030;D3Z5S0;D3YWY6;D3Z786	3;3;3;3;3;2	3;3;3;3;3;2	3;3;3;3;3;2	Brain protein 44-like protein	Brp44l;Gm3452	>tr|E9Q0V4|E9Q0V4_MOUSE Mitochondrial pyruvate carrier 1 OS=Mus musculus GN=Mpc1 PE=4 SV=1;>tr|E9PXT1|E9PXT1_MOUSE Protein LOC100047509 OS=Mus musculus GN=Mpc1-ps PE=4 SV=1;>sp|P63030|MPC1_MOUSE Mitochondrial pyruvate carrier 1 OS=Mus musculus GN=Mpc1 PE=1	6	3	3	3	0	1	0	3	0	1	0	3	0	1	0	3	18	18	18	18.36	167	167;109;109;86;85;78		1		4	5	1.8521e-20	0.80112	0.72319	49.135	5	NaN	NaN	NaN	0	1.5129	2.0425	NaN	1	NaN	NaN
Q8K368;D3YX57;Q8K368-4;F7ALG5;Q8K368-2;F2Z414;D3YVC7	Q8K368;D3YX57;Q8K368-4;F7ALG5	13;13;9;9;5;4;1	12;12;9;9;5;4;1	12;12;9;9;5;4;1	Fanconi anemia group I protein homolog	Fanci	>sp|Q8K368|FANCI_MOUSE Fanconi anemia group I protein homolog OS=Mus musculus GN=Fanci PE=1 SV=2;>tr|D3YX57|D3YX57_MOUSE Fanconi anemia group I protein homolog OS=Mus musculus GN=Fanci PE=4 SV=1;>sp|Q8K368-4|FANCI_MOUSE Isoform 4 of Fanconi anemia group I	7	13	12	12	1	5	10	4	0	5	9	3	0	5	9	3	10.9	10.4	10.4	149.32	1330	1330;1325;878;850;394;300;73		10	12	5	27	3.0365e-32	1.3383	1.3253	50.166	25	NaN	NaN	NaN	0	0.43563	0.55828	8.3385	9	1.687	1.6806
D3YX76;A2AE91;D3YVP9;D3YVP8	D3YX76	20;7;6;4	2;2;2;2	2;2;2;2		Gstm2	>tr|D3YX76|D3YX76_MOUSE Glutathione S-transferase Mu 2 OS=Mus musculus GN=Gstm2 PE=3 SV=1	4	20	2	2	15	17	19	17	1	0	1	0	1	0	1	0	85.9	4.9	4.9	21.669	184	184;184;154;123	1		2		3	0	1.8244	1.7176	2.0579	2	NaN	NaN	NaN	0	NaN	NaN	NaN	0	1.8244	1.7176
Q9CXK4;D3YXA7	Q9CXK4;D3YXA7	2;2	2;2	2;2	Sugar transporter SWEET1	Slc50a1	>sp|Q9CXK4|SWET1_MOUSE Sugar transporter SWEET1 OS=Mus musculus GN=Slc50a1 PE=2 SV=1;>tr|D3YXA7|D3YXA7_MOUSE Sugar transporter SWEET1 OS=Mus musculus GN=Slc50a1 PE=4 SV=1	2	2	2	2	0	1	2	1	0	1	2	1	0	1	2	1	9	9	9	24.649	221	221;167		2	3	2	7	3.2826e-06	0.76815	0.80955	12.821	7	NaN	NaN	NaN	0	0.69283	1.014	0.61763	2	0.76815	0.78482
D3Z1Z1;Q3ULF4;D3YXB7;D3YZN4;D3Z342;G3UX97	D3Z1Z1;Q3ULF4;D3YXB7;D3YZN4	4;4;4;3;1;1	4;4;4;3;1;1	4;4;4;3;1;1	Paraplegin	Spg7	>tr|D3Z1Z1|D3Z1Z1_MOUSE Paraplegin OS=Mus musculus GN=Spg7 PE=3 SV=1;>sp|Q3ULF4|SPG7_MOUSE Paraplegin OS=Mus musculus GN=Spg7 PE=1 SV=1;>tr|D3YXB7|D3YXB7_MOUSE Paraplegin OS=Mus musculus GN=Spg7 PE=4 SV=1;>tr|D3YZN4|D3YZN4_MOUSE Paraplegin OS=Mus musculus	6	4	4	4	0	1	2	3	0	1	2	3	0	1	2	3	4.4	4.4	4.4	86.007	781	781;781;744;676;230;209		3	2	4	9	2.7458e-10	1.2736	1.2862	22.363	8	NaN	NaN	NaN	0	0.78233	1.1363	34.037	2	1.5285	1.4976
Q91W82;D3YXD1;P52483;D3YW10;H3BL69;H3BL23;H3BKX9;B2FDH0;H3BJB5	Q91W82;D3YXD1;P52483;D3YW10;H3BL69;H3BL23;H3BKX9;B2FDH0	4;4;3;3;2;2;2;2;1	4;4;3;3;2;2;2;2;1	2;2;1;2;0;0;1;1;1	Ubiquitin-conjugating enzyme E2 E2;Ubiquitin-conjugating enzyme E2 E3	Ube2e2;Ube2e3	>sp|Q91W82|UB2E2_MOUSE Ubiquitin-conjugating enzyme E2 E2 OS=Mus musculus GN=Ube2e2 PE=2 SV=1;>tr|D3YXD1|D3YXD1_MOUSE Ubiquitin-conjugating enzyme E2 E2 (Fragment) OS=Mus musculus GN=Ube2e2 PE=3 SV=2;>sp|P52483|UB2E3_MOUSE Ubiquitin-conjugating enzyme E2 E	9	4	4	2	4	2	4	4	4	2	4	4	2	1	2	2	26.9	26.9	17.4	22.241	201	201;181;207;108;167;146;118;104;92	9	3	7	7	26	1.6277e-17	1.5961	1.4758	101.1	21	0.35684	0.54193	166.41	7	0.35036	0.45486	9.1947	3	1.6484	1.4894
D3YXK1	D3YXK1	1	1	1	Atherin	Samd1	>sp|D3YXK1|SAMD1_MOUSE Atherin OS=Mus musculus GN=Samd1 PE=3 SV=1	1	1	1	1	1	1	1	1	1	1	1	1	1	1	1	1	3.5	3.5	3.5	54.532	519	519	5	4	4	5	18	1.1224e-65	NaN	NaN	NaN	0	NaN	NaN	NaN	0	NaN	NaN	NaN	0	NaN	NaN
D3YXK2	D3YXK2	10	10	5	Scaffold attachment factor B1	Safb	>sp|D3YXK2|SAFB1_MOUSE Scaffold attachment factor B1 OS=Mus musculus GN=Safb PE=1 SV=2	1	10	10	5	7	6	6	7	7	6	6	7	3	3	3	3	9.8	9.8	5.2	105.1	937	937	92	73	69	89	323	2.0831e-251	0.85263	1.1851	NaN	1	0.85263	1.1851	NaN	1	NaN	NaN	NaN	0	NaN	NaN
Q9D1G2;D3YXP6;Q9D1G2-2;Q9D1G2-3	Q9D1G2;D3YXP6;Q9D1G2-2	13;13;11;6	13;13;11;6	13;13;11;6	Phosphomevalonate kinase	Pmvk	>sp|Q9D1G2|PMVK_MOUSE Phosphomevalonate kinase OS=Mus musculus GN=Pmvk PE=2 SV=3;>tr|D3YXP6|D3YXP6_MOUSE Phosphomevalonate kinase OS=Mus musculus GN=Pmvk PE=4 SV=1;>sp|Q9D1G2-2|PMVK_MOUSE Isoform 2 of Phosphomevalonate kinase OS=Mus musculus GN=Pmvk	4	13	13	13	7	9	10	10	7	9	10	10	7	9	10	10	56.2	56.2	56.2	21.916	192	192;158;171;117	16	19	29	29	93	9.3546e-89	2.1892	2.1147	64.736	93	0.40414	0.59588	19.331	16	0.45434	0.62397	17.711	19	2.4829	2.4137
Q60953;D3YXR5;D3Z3A6;Q60953-2;F7BTZ2;F6XUT1;D6RII9	Q60953;D3YXR5;D3Z3A6;Q60953-2;F7BTZ2	10;10;10;9;9;1;1	10;10;10;9;9;1;1	10;10;10;9;9;1;1	Protein PML	Pml	>sp|Q60953|PML_MOUSE Protein PML OS=Mus musculus GN=Pml PE=1 SV=3;>tr|D3YXR5|D3YXR5_MOUSE Protein PML OS=Mus musculus GN=Pml PE=4 SV=1;>tr|D3Z3A6|D3Z3A6_MOUSE Protein PML OS=Mus musculus GN=Pml PE=4 SV=1;>sp|Q60953-2|PML_MOUSE Isoform 2 of Protein PML OS=M	7	10	10	10	6	7	8	6	6	7	8	6	6	7	8	6	16.9	16.9	16.9	98.241	885	885;641;632;839;578;124;53	34	48	33	46	161	4.4658e-118	1.1681	1.1234	28.831	4	0.56492	0.74336	NaN	1	NaN	NaN	NaN	0	1.3031	1.2436
E9PYD1;D3YXS7;F6S0H0;F6ZXW2;D3Z100;F7AR27	E9PYD1;D3YXS7;F6S0H0;F6ZXW2;D3Z100;F7AR27	2;2;1;1;1;1	2;2;1;1;1;1	2;2;1;1;1;1		Fam98c	>tr|E9PYD1|E9PYD1_MOUSE Protein Fam98c OS=Mus musculus GN=Fam98c PE=4 SV=1;>tr|D3YXS7|D3YXS7_MOUSE Protein Fam98c (Fragment) OS=Mus musculus GN=Fam98c PE=4 SV=1;>tr|F6S0H0|F6S0H0_MOUSE Protein Fam98c (Fragment) OS=Mus musculus GN=Fam98c PE=4 SV=1;>tr|F6ZXW	6	2	2	2	0	1	1	1	0	1	1	1	0	1	1	1	10.2	10.2	10.2	37.271	344	344;273;259;213;142;135		3	1	5	9	7.8256e-05	1.1066	1.1125	NaN	1	NaN	NaN	NaN	0	NaN	NaN	NaN	0	1.1066	1.1125
Q9D945;Q9D945-2;D3YXW1	Q9D945;Q9D945-2;D3YXW1	4;4;4	4;4;4	4;4;4	Protein LLP homolog	Llph	>sp|Q9D945|LLPH_MOUSE Protein LLP homolog OS=Mus musculus GN=Llph PE=2 SV=1;>sp|Q9D945-2|LLPH_MOUSE Isoform 2 of Protein LLP homolog OS=Mus musculus GN=Llph;>tr|D3YXW1|D3YXW1_MOUSE Protein LLP homolog (Fragment) OS=Mus musculus GN=Llph PE=4 SV=1	3	4	4	4	2	1	3	1	2	1	3	1	2	1	3	1	29.2	29.2	29.2	15.391	130	130;129;123	4	2	10	4	20	4.4179e-33	1.1658	1.1068	18.326	20	0.56281	0.765	15.522	4	0.7155	1.0212	10.346	2	1.169	1.116
Q91YS4;D3YXZ3;O88448;D3Z5Y7	Q91YS4;D3YXZ3;O88448	8;8;8;1	2;2;2;1	2;2;2;1	Kinesin light chain 2	Klc2	>tr|Q91YS4|Q91YS4_MOUSE Kinesin light chain 2 OS=Mus musculus GN=Klc2 PE=2 SV=1;>tr|D3YXZ3|D3YXZ3_MOUSE Kinesin light chain 2 OS=Mus musculus GN=Klc2 PE=4 SV=1;>sp|O88448|KLC2_MOUSE Kinesin light chain 2 OS=Mus musculus GN=Klc2 PE=1 SV=1	4	8	2	2	6	6	7	6	1	1	2	1	1	1	2	1	17.9	4.8	4.8	68.419	619	619;617;599;167	30	24	21	20	95	2.7412e-45	1.1282	1.085	NaN	1	NaN	NaN	NaN	0	NaN	NaN	NaN	0	1.1282	1.085
D3YY09;Q9D6N5;F6T9K1	D3YY09;Q9D6N5;F6T9K1	5;5;5	5;5;5	1;1;1	Dr1-associated corepressor	Drap1	>tr|D3YY09|D3YY09_MOUSE Dr1-associated corepressor OS=Mus musculus GN=Drap1 PE=4 SV=1;>sp|Q9D6N5|NC2A_MOUSE Dr1-associated corepressor OS=Mus musculus GN=Drap1 PE=2 SV=3;>tr|F6T9K1|F6T9K1_MOUSE Dr1-associated corepressor OS=Mus musculus GN=Drap1 PE=4 SV=2	3	5	5	1	3	3	5	3	3	3	5	3	0	0	1	0	21.7	21.7	4.7	23.161	212	212;205;182	3	11	12	10	36	2.458e-28	1.3922	1.2325	36.878	36	0.55825	0.70266	67.986	3	0.46564	0.64981	13.69	11	1.4354	1.2642
Q8VDK1;Q8VDK1-2;D3YY53;D3Z3I3;D3Z2Y2	Q8VDK1;Q8VDK1-2;D3YY53;D3Z3I3;D3Z2Y2	4;4;4;4;3	4;4;4;4;3	4;4;4;4;3	Nitrilase homolog 1	Nit1	>sp|Q8VDK1|NIT1_MOUSE Nitrilase homolog 1 OS=Mus musculus GN=Nit1 PE=2 SV=2;>sp|Q8VDK1-2|NIT1_MOUSE Isoform 2 of Nitrilase homolog 1 OS=Mus musculus GN=Nit1;>tr|D3YY53|D3YY53_MOUSE Nitrilase homolog 1 OS=Mus musculus GN=Nit1 PE=4 SV=1;>tr|D3Z3I3|D3Z3I3_MOU	5	4	4	4	1	0	3	1	1	0	3	1	1	0	3	1	19.8	19.8	19.8	35.705	323	323;290;239;132;87	1		4	2	7	1.0141e-10	1.4808	1.4049	36	7	0.39711	0.56783	NaN	1	NaN	NaN	NaN	0	1.6023	1.4939
Q8VDS8;Q8VDS8-3;D3YY98;Q8VDS8-2	Q8VDS8;Q8VDS8-3;D3YY98;Q8VDS8-2	5;5;5;3	5;5;5;3	5;5;5;3	Syntaxin-18	Stx18	>sp|Q8VDS8|STX18_MOUSE Syntaxin-18 OS=Mus musculus GN=Stx18 PE=2 SV=2;>sp|Q8VDS8-3|STX18_MOUSE Isoform 3 of Syntaxin-18 OS=Mus musculus GN=Stx18;>tr|D3YY98|D3YY98_MOUSE Syntaxin-18 (Fragment) OS=Mus musculus GN=Stx18 PE=4 SV=1;>sp|Q8VDS8-2|STX18_MOUSE Isof	4	5	5	5	4	1	4	1	4	1	4	1	4	1	4	1	19.8	19.8	19.8	38.381	334	334;308;252;308	6	2	7	2	17	1.5655e-12	0.93012	1.0237	12.453	14	0.88696	0.98688	13.147	5	0.91291	1.0756	7.2747	2	0.9304	0.99818
D3YYC3;O88974-4;G5E8N3;O88974;O88974-7;O88974-6;O88974-5;O88974-3;O88974-2	D3YYC3;O88974-4;G5E8N3;O88974;O88974-7	3;3;3;3;2;1;1;1;1	3;3;3;3;2;1;1;1;1	3;3;3;3;2;1;1;1;1	Histone-lysine N-methyltransferase SETDB1	Setdb1	>tr|D3YYC3|D3YYC3_MOUSE Histone-lysine N-methyltransferase SETDB1 OS=Mus musculus GN=Setdb1 PE=3 SV=1;>sp|O88974-4|SETB1_MOUSE Isoform 4 of Histone-lysine N-methyltransferase SETDB1 OS=Mus musculus GN=Setdb1;>tr|G5E8N3|G5E8N3_MOUSE Histone-lysine N-methylt	9	3	3	3	3	0	1	1	3	0	1	1	3	0	1	1	2.8	2.8	2.8	144.64	1308	1308;1308;1307;1307;755;527;526;500;488	5		2	1	8	1.4552e-06	0.44311	0.54552	63.035	8	0.38979	0.51437	8.4387	5	NaN	NaN	NaN	0	1.6914	1.6841
D3YYD5	D3YYD5	10	1	1		Vps29	>tr|D3YYD5|D3YYD5_MOUSE Vacuolar protein sorting-associated protein 29 (Fragment) OS=Mus musculus GN=Vps29 PE=4 SV=1	1	10	1	1	6	7	9	5	0	0	1	0	0	0	1	0	89.5	8.1	8.1	13.723	124	124			1		1	1.032e-169	NaN	NaN	NaN	0	NaN	NaN	NaN	0	NaN	NaN	NaN	0	NaN	NaN
P60898;D3YYI3;D3Z3Z8	P60898;D3YYI3;D3Z3Z8	1;1;1	1;1;1	1;1;1	DNA-directed RNA polymerase II subunit RPB9;DNA-directed RNA polymerase subunit	Polr2i	>sp|P60898|RPB9_MOUSE DNA-directed RNA polymerase II subunit RPB9 OS=Mus musculus GN=Polr2i PE=2 SV=1;>tr|D3YYI3|D3YYI3_MOUSE DNA-directed RNA polymerase subunit OS=Mus musculus GN=Polr2i PE=3 SV=1;>tr|D3Z3Z8|D3Z3Z8_MOUSE DNA-directed RNA polymerase II sub	3	1	1	1	0	1	0	1	0	1	0	1	0	1	0	1	18.4	18.4	18.4	14.523	125	125;103;83		2		3	5	1.5144e-10	1.1889	1.1701	23.286	5	NaN	NaN	NaN	0	0.55073	0.81977	6.646	2	NaN	NaN
D3YYI5	D3YYI5	21	1	1	Glyceraldehyde-3-phosphate dehydrogenase	Gm7293	>tr|D3YYI5|D3YYI5_MOUSE Glyceraldehyde-3-phosphate dehydrogenase OS=Mus musculus GN=Gm7293 PE=3 SV=1	1	21	1	1	16	16	20	18	0	1	0	1	0	1	0	1	62.5	3.6	3.6	36.303	336	336		1		1	2	0	0.96664	1.0775	18.717	2	NaN	NaN	NaN	0	0.89454	1.23	NaN	1	NaN	NaN
1711427;1711428;1711429;1711430;1711431;1711432;1711433;1711434;1711435;1711436;1711437;1711438;1711439;1711440;1711441;1711442;1711443;1711444;1711445;1711446;1711447;1711448;1711449;1711450;1711451;1711452;1711453;1711454;1711455;1711456;1711457;1711458;1711459;1711460;1711461;1711462;1711463;1711464;1711465;1711466;1711467;1711468;1711469;1711470;1711471;1711472;1711473;1711474;1711475;1711476…	196016;541111;763134;871300;917639;1015644;1171719;1171721;1306224;1306276;1568033;1603886;1623687;1630228;1631038;1631396;1631448;1633108;1639070;1711417;1711677	446;447;477;478;479;480;481	765;766;6942;6943;6956;6957;6958	43;46;131;134;176;329;332	149;152;154;155;178;183;185
D3YYI7	D3YYI7	1	1	1	Probable E3 ubiquitin-protein ligase RNF217	Rnf217	>sp|D3YYI7|RN217_MOUSE Probable E3 ubiquitin-protein ligase RNF217 OS=Mus musculus GN=Rnf217 PE=3 SV=2	1	1	1	1	1	1	1	1	1	1	1	1	1	1	1	1	3.1	3.1	3.1	56.036	515	515	8	2	8	2	20	6.6707e-07	NaN	NaN	NaN	0	NaN	NaN	NaN	0	NaN	NaN	NaN	0	NaN	NaN
Q8R001;Q8R001-2;E9Q6X0;D3YYK8;Q3TG90	Q8R001;Q8R001-2;E9Q6X0;D3YYK8;Q3TG90	10;10;10;10;6	10;10;10;10;6	9;9;9;9;5	Microtubule-associated protein RP/EB family member 2	Mapre2	>sp|Q8R001|MARE2_MOUSE Microtubule-associated protein RP/EB family member 2 OS=Mus musculus GN=Mapre2 PE=1 SV=1;>sp|Q8R001-2|MARE2_MOUSE Isoform 2 of Microtubule-associated protein RP/EB family member 2 OS=Mus musculus GN=Mapre2;>tr|E9Q6X0|E9Q6X0_MOUSE Mic	5	10	10	9	4	3	8	4	4	3	8	4	3	3	7	3	33.4	33.4	30.4	36.946	326	326;317;284;260;171	5	5	13	9	32	2.0919e-150	0.80663	0.87409	46.104	27	0.80291	0.94805	48.391	4	0.85102	1.0674	43.057	4	0.82121	0.79799
E9PVY0;Q3UU96;D3YYN8;H7BX44;Q3UU96-2;F6Q5A5;F6S5Z6;F6YZJ7;F6W0C2	E9PVY0;Q3UU96;D3YYN8;H7BX44;Q3UU96-2;F6Q5A5;F6S5Z6	10;10;10;10;9;7;5;4;2	6;6;6;6;6;6;4;3;2	6;6;6;6;6;6;4;3;2	Serine/threonine-protein kinase MRCK alpha	Cdc42bpa	>tr|E9PVY0|E9PVY0_MOUSE Serine/threonine-protein kinase MRCK alpha OS=Mus musculus GN=Cdc42bpa PE=4 SV=1;>sp|Q3UU96|MRCKA_MOUSE Serine/threonine-protein kinase MRCK alpha OS=Mus musculus GN=Cdc42bpa PE=1 SV=2;>tr|D3YYN8|D3YYN8_MOUSE Serine/threonine-protei	9	10	6	6	5	5	8	5	4	3	5	2	4	3	5	2	6.2	4	4	196.92	1732	1732;1719;1691;1638;1534;1048;984;732;185	7	7	8	6	28	7.8088e-25	0.85023	0.99113	34.62	14	0.93367	1.3053	30.451	4	0.71439	1.0516	6.4577	3	0.5914	0.59526
P15116;D3YYT0;P39038	P15116;D3YYT0	11;11;1	11;11;1	11;11;1	Cadherin-2	Cdh2	>sp|P15116|CADH2_MOUSE Cadherin-2 OS=Mus musculus GN=Cdh2 PE=1 SV=2;>tr|D3YYT0|D3YYT0_MOUSE Cadherin-2 OS=Mus musculus GN=Cdh2 PE=3 SV=1	3	11	11	11	6	5	7	3	6	5	7	3	6	5	7	3	20.8	20.8	20.8	99.795	906	906;849;913	13	9	12	3	37	9.57e-74	1.3073	1.9037	83.142	37	1.4737	2.2994	34.474	13	1.8013	2.4396	35.61	9	0.52957	0.51163
D3YYT1;Q922P9	D3YYT1;Q922P9	8;7	8;7	8;7	Putative oxidoreductase GLYR1	Glyr1	>tr|D3YYT1|D3YYT1_MOUSE Putative oxidoreductase GLYR1 OS=Mus musculus GN=Glyr1 PE=4 SV=1;>sp|Q922P9|GLYR1_MOUSE Putative oxidoreductase GLYR1 OS=Mus musculus GN=Glyr1 PE=2 SV=1	2	8	8	8	1	2	8	2	1	2	8	2	1	2	8	2	17.9	17.9	17.9	60.435	552	552;546	7	4	24	7	42	1.1925e-36	1.1488	1.062	11.959	16	NaN	NaN	NaN	0	0.93753	1.2576	NaN	1	1.1488	1.0299
Q9JHE7;D3YYU6;D3YZR1;D3Z6S3	Q9JHE7;D3YYU6;D3YZR1;D3Z6S3	2;2;2;2	2;2;2;2	2;2;2;2	Protein TSSC4	Tssc4	>sp|Q9JHE7|TSSC4_MOUSE Protein TSSC4 OS=Mus musculus GN=Tssc4 PE=2 SV=1;>tr|D3YYU6|D3YYU6_MOUSE Protein TSSC4 (Fragment) OS=Mus musculus GN=Tssc4 PE=4 SV=2;>tr|D3YZR1|D3YZR1_MOUSE Protein TSSC4 (Fragment) OS=Mus musculus GN=Tssc4 PE=4 SV=1;>tr|D3Z6S3|D3Z6S	4	2	2	2	1	0	0	1	1	0	0	1	1	0	0	1	6.9	6.9	6.9	33.569	317	317;266;217;196	1			1	2	6.7444e-07	NaN	NaN	NaN	0	NaN	NaN	NaN	0	NaN	NaN	NaN	0	NaN	NaN
D3YYU8;F7AD47	D3YYU8;F7AD47	13;7	13;7	13;7		Obsl1	>tr|D3YYU8|D3YYU8_MOUSE Protein Obsl1 OS=Mus musculus GN=Obsl1 PE=4 SV=1;>tr|F7AD47|F7AD47_MOUSE Protein Obsl1 (Fragment) OS=Mus musculus GN=Obsl1 PE=4 SV=1	2	13	13	13	5	8	7	3	5	8	7	3	5	8	7	3	10	10	10	197.93	1804	1804;1162	12	17	11	6	46	1.3359e-41	0.84932	0.92727	38.807	30	1.0171	1.4188	59.11	7	0.50399	0.66619	34.581	13	1.0033	0.97077
O35144;D3YZ08;O35144-2	O35144;D3YZ08;O35144-2	2;2;2	2;2;2	2;2;2	Telomeric repeat-binding factor 2	Terf2	>sp|O35144|TERF2_MOUSE Telomeric repeat-binding factor 2 OS=Mus musculus GN=Terf2 PE=1 SV=3;>tr|D3YZ08|D3YZ08_MOUSE Telomeric repeat-binding factor 2 OS=Mus musculus GN=Terf2 PE=4 SV=1;>sp|O35144-2|TERF2_MOUSE Isoform 2 of Telomeric repeat-binding factor 2	3	2	2	2	2	2	2	2	2	2	2	2	2	2	2	2	4.4	4.4	4.4	60.263	541	541;540;470	34	24	32	30	120	6.2063e-140	NaN	NaN	NaN	0	NaN	NaN	NaN	0	NaN	NaN	NaN	0	NaN	NaN
Q9CY66;Q9CY66-2;Q9CY66-3;D3YZ09;F6SL78	Q9CY66;Q9CY66-2;Q9CY66-3;D3YZ09	7;7;7;7;3	7;7;7;7;3	7;7;7;7;3	H/ACA ribonucleoprotein complex subunit 1	Gar1	>sp|Q9CY66|GAR1_MOUSE H/ACA ribonucleoprotein complex subunit 1 OS=Mus musculus GN=Gar1 PE=2 SV=1;>sp|Q9CY66-2|GAR1_MOUSE Isoform 2 of H/ACA ribonucleoprotein complex subunit 1 OS=Mus musculus GN=Gar1;>sp|Q9CY66-3|GAR1_MOUSE Isoform 3 of H/ACA ribonucleopr	5	7	7	7	4	2	5	4	4	2	5	4	4	2	5	4	34.2	34.2	34.2	23.474	231	231;229;217;198;79	6	5	13	6	30	3.5052e-30	0.84512	0.79869	94.608	30	1.2663	1.9468	49.549	6	1.3624	1.8512	99.649	5	0.82131	0.73508
D3YZ61;Q9ES30	D3YZ61;Q9ES30	2;2	2;2	2;2	Complement C1q tumor necrosis factor-related protein 3	C1qtnf3	>tr|D3YZ61|D3YZ61_MOUSE Complement C1q tumor necrosis factor-related protein 3 OS=Mus musculus GN=C1qtnf3 PE=4 SV=1;>sp|Q9ES30|C1QT3_MOUSE Complement C1q tumor necrosis factor-related protein 3 OS=Mus musculus GN=C1qtnf3 PE=2 SV=1	2	2	2	2	1	1	1	1	1	1	1	1	1	1	1	1	7.5	7.5	7.5	34.984	319	319;246	2	2	2	2	8	2.2848e-07	10.106	14.46	181.83	6	10.106	14.46	7.2659	2	13.087	18.483	16.718	2	NaN	NaN
D3Z4J3;Q99104;D3YZ62;F6TDE5;D6RFU0;B8JK05;F6Z2S4;D3Z135	D3Z4J3;Q99104;D3YZ62	22;22;22;8;2;1;1;1	22;22;22;8;2;1;1;1	17;17;17;8;1;1;1;0	Unconventional myosin-Va	Myo5a	>tr|D3Z4J3|D3Z4J3_MOUSE Unconventional myosin-Va OS=Mus musculus GN=Myo5a PE=4 SV=1;>sp|Q99104|MYO5A_MOUSE Unconventional myosin-Va OS=Mus musculus GN=Myo5a PE=1 SV=2;>tr|D3YZ62|D3YZ62_MOUSE Unconventional myosin-Va OS=Mus musculus GN=Myo5a PE=4 SV=1	8	22	22	17	8	14	9	12	8	14	9	12	6	10	7	11	15.1	15.1	11.2	215.52	1855	1855;1853;1828;585;47;228;217;183	14	26	18	29	87	5.0367e-85	0.96508	1.0541	28.555	87	0.74705	0.87704	12.628	14	0.73663	0.99258	26.147	26	1.1256	1.1
Q6PF93;E9QLS6;Q6PF93-2;D3YZ98;E9Q824	Q6PF93;E9QLS6;Q6PF93-2;D3YZ98;E9Q824	2;2;2;2;2	2;2;2;2;2	2;2;2;2;2	Phosphatidylinositol 3-kinase catalytic subunit type 3	Pik3c3	>sp|Q6PF93|PK3C3_MOUSE Phosphatidylinositol 3-kinase catalytic subunit type 3 OS=Mus musculus GN=Pik3c3 PE=1 SV=1;>tr|E9QLS6|E9QLS6_MOUSE Phosphatidylinositol 3-kinase catalytic subunit type 3 OS=Mus musculus GN=Pik3c3 PE=4 SV=1;>sp|Q6PF93-2|PK3C3_MOUSE Is	5	2	2	2	1	2	1	1	1	2	1	1	1	2	1	1	4.2	4.2	4.2	101.49	887	887;848;848;756;513	1	5	2	2	10	1.7066e-05	0.77913	0.94201	NaN	1	NaN	NaN	NaN	0	0.77913	0.94201	NaN	1	NaN	NaN
Q9CY57;Q9CY57-2;E9PW20;Q9CY57-3;D3Z7T7;Q9CY57-4;Q9CY57-5;D3YZA1	Q9CY57;Q9CY57-2;E9PW20;Q9CY57-3;D3Z7T7;Q9CY57-4;Q9CY57-5;D3YZA1	3;3;3;3;3;3;3;3	3;3;3;3;3;3;3;3	3;3;3;3;3;3;3;3	Friend of PRMT1 protein	Fop;2500003M10Rik	>sp|Q9CY57|CHTOP_MOUSE Chromatin target of PRMT1 protein OS=Mus musculus GN=Chtop PE=1 SV=2;>sp|Q9CY57-2|CHTOP_MOUSE Isoform 2 of Chromatin target of PRMT1 protein OS=Mus musculus GN=Chtop;>tr|E9PW20|E9PW20_MOUSE Uncharacterized protein OS=Mus musculus GN=	8	3	3	3	0	0	2	1	0	0	2	1	0	0	2	1	12	12	12	26.585	249	249;224;203;202;195;178;177;124			4	1	5	9.1044e-38	1.5491	1.499	21.011	5	NaN	NaN	NaN	0	NaN	NaN	NaN	0	1.645	1.5925
F8WHD9;O88559;D3YZC2;O88559-2;F7CJP6	F8WHD9;O88559;D3YZC2;O88559-2;F7CJP6	2;2;2;2;1	2;2;2;2;1	2;2;2;2;1	Menin	Men1	>tr|F8WHD9|F8WHD9_MOUSE Menin OS=Mus musculus GN=Men1 PE=4 SV=1;>sp|O88559|MEN1_MOUSE Menin OS=Mus musculus GN=Men1 PE=1 SV=2;>tr|D3YZC2|D3YZC2_MOUSE Menin OS=Mus musculus GN=Men1 PE=4 SV=1;>sp|O88559-2|MEN1_MOUSE Isoform 2 of Menin OS=Mus musculus GN=Men1	5	2	2	2	1	2	1	2	1	2	1	2	1	2	1	2	7.3	7.3	7.3	68.059	616	616;611;576;556;108	4	7	2	8	21	1.6041e-22	1.9248	2.6204	80.617	13	1.9821	2.6753	2.3682	4	2.3868	2.7866	3.4477	3	0.38015	0.39088
Q8BL95;D3YZC4;D6REH7	Q8BL95;D3YZC4;D6REH7	1;1;1	1;1;1	1;1;1		1110004E09Rik	>tr|Q8BL95|Q8BL95_MOUSE Protein 1110004E09Rik OS=Mus musculus GN=1110004E09Rik PE=2 SV=1;>tr|D3YZC4|D3YZC4_MOUSE Protein 1110004E09Rik (Fragment) OS=Mus musculus GN=1110004E09Rik PE=4 SV=1;>tr|D6REH7|D6REH7_MOUSE Protein 1110004E09Rik OS=Mus musculus GN=11	3	1	1	1	1	0	0	0	1	0	0	0	1	0	0	0	9	9	9	33.19	290	290;198;145	1				1	0.00023108	0.7012	1.0521	NaN	1	0.7012	1.0521	NaN	1	NaN	NaN	NaN	0	NaN	NaN
D3YZC8;Q8R3B7;D3YZC7;Q8R3B7-2	D3YZC8;Q8R3B7;D3YZC7	3;3;3;1	3;3;3;1	3;3;3;1	Bromodomain-containing protein 8	Brd8	>tr|D3YZC8|D3YZC8_MOUSE Bromodomain-containing protein 8 OS=Mus musculus GN=Brd8 PE=4 SV=1;>sp|Q8R3B7|BRD8_MOUSE Bromodomain-containing protein 8 OS=Mus musculus GN=Brd8 PE=1 SV=2;>tr|D3YZC7|D3YZC7_MOUSE Bromodomain-containing protein 8 OS=Mus musculus GN=	4	3	3	3	3	2	1	2	3	2	1	2	3	2	1	2	3.7	3.7	3.7	102.87	954	954;951;881;878	8	13	5	13	39	8.1803e-20	NaN	NaN	NaN	0	NaN	NaN	NaN	0	NaN	NaN	NaN	0	NaN	NaN
Q64213;Q64213-3;D3YZD0;D3YZC9;E9Q4Q2;Q64213-2;D3YVH4;F8WHF9;D6RDB7	Q64213;Q64213-3;D3YZD0;D3YZC9;E9Q4Q2;Q64213-2;D3YVH4	16;16;16;16;16;16;13;3;1	16;16;16;16;16;16;13;3;1	16;16;16;16;16;16;13;3;1	Splicing factor 1	Sf1	>sp|Q64213|SF01_MOUSE Splicing factor 1 OS=Mus musculus GN=Sf1 PE=1 SV=6;>sp|Q64213-3|SF01_MOUSE Isoform 3 of Splicing factor 1 OS=Mus musculus GN=Sf1;>tr|D3YZD0|D3YZD0_MOUSE Splicing factor 1 OS=Mus musculus GN=Sf1 PE=4 SV=1;>tr|D3YZC9|D3YZC9_MOUSE Splici	9	16	16	16	13	9	14	14	13	9	14	14	13	9	14	14	30.6	30.6	30.6	70.402	653	653;639;638;571;548;548;267;110;84	39	26	50	43	158	6.0089e-277	1.4053	1.3356	52.175	131	0.39902	0.58081	21.653	35	0.4722	0.66386	43.985	18	1.559	1.5117
D3YZD8;D3Z442;Q8R0P4;D3Z1Q3;Q8R0P4-2;Q8CF11;D3YX09;D3YWY5	D3YZD8;D3Z442;Q8R0P4;D3Z1Q3;Q8R0P4-2;Q8CF11;D3YX09	5;5;5;3;3;3;3;2	5;5;5;3;3;3;3;2	5;5;5;3;3;3;3;2	UPF0366 protein C11orf67 homolog	1810020D17Rik	>tr|D3YZD8|D3YZD8_MOUSE Protein 1810020D17Rik OS=Mus musculus GN=1810020D17Rik PE=4 SV=1;>tr|D3Z442|D3Z442_MOUSE Protein 1810020D17Rik OS=Mus musculus GN=1810020D17Rik PE=4 SV=1;>sp|Q8R0P4|AAMDC_MOUSE Mth938 domain-containing protein OS=Mus musculus GN=Aam	8	5	5	5	0	0	0	5	0	0	0	5	0	0	0	5	36	36	36	16.358	150	150;139;122;118;90;68;52;128				8	8	8.5082e-12	0.87156	0.82423	12.539	7	NaN	NaN	NaN	0	NaN	NaN	NaN	0	NaN	NaN
D3YZI0	D3YZI0	1	1	1		Olfr287	>tr|D3YZI0|D3YZI0_MOUSE Protein Olfr287 (Fragment) OS=Mus musculus GN=Olfr287 PE=3 SV=1	1	1	1	1	1	0	1	0	1	0	1	0	1	0	1	0	9.1	9.1	9.1	23.539	209	209	4		1		5	0.0023322	1.5586	2.3173	82.802	5	1.5863	2.4228	5.923	4	NaN	NaN	NaN	0	0.39044	0.38253
Q9CX13;D3YZJ4	Q9CX13;D3YZJ4	1;1	1;1	1;1	Protein cornichon homolog 4	Cnih4	>sp|Q9CX13|CNIH4_MOUSE Protein cornichon homolog 4 OS=Mus musculus GN=Cnih4 PE=2 SV=1;>tr|D3YZJ4|D3YZJ4_MOUSE Protein cornichon homolog 4 OS=Mus musculus GN=Cnih4 PE=4 SV=1	2	1	1	1	1	0	1	0	1	0	1	0	1	0	1	0	14.4	14.4	14.4	16.089	139	139;111	2		2		4	0.00077222	0.83884	0.98463	9.1922	4	0.62553	0.93653	11.006	2	NaN	NaN	NaN	0	1.078	1.015
D3YZN8;D3YVI2	D3YZN8	5;2	1;1	1;1		Unc45a	>tr|D3YZN8|D3YZN8_MOUSE Protein unc-45 homolog A (Fragment) OS=Mus musculus GN=Unc45a PE=4 SV=1	2	5	1	1	0	1	3	3	0	0	1	1	0	0	1	1	37.7	5.7	5.7	19.446	175	175;84			2	2	4	4.8788e-67	0.92617	0.91264	10.995	4	NaN	NaN	NaN	0	NaN	NaN	NaN	0	0.92617	0.95163
D3YZP9;F6SXB0	D3YZP9	11;1	11;1	11;1	Coiled-coil domain-containing protein 6	Ccdc6	>sp|D3YZP9|CCDC6_MOUSE Coiled-coil domain-containing protein 6 OS=Mus musculus GN=Ccdc6 PE=3 SV=1	2	11	11	11	4	6	7	4	4	6	7	4	4	6	7	4	25.4	25.4	25.4	52.938	469	469;137	25	17	21	20	83	2.7725e-51	0.85159	1.2372	38.912	17	0.9684	1.3963	6.6307	4	0.90045	1.2632	47.267	5	0.71804	0.67679
Q8VEA8;D3YZQ6;Q8VEA8-2;D3Z4X4	Q8VEA8;D3YZQ6;Q8VEA8-2;D3Z4X4	2;2;1;1	2;2;1;1	2;2;1;1	Ras-related protein Rab-7b	Rab7b;5430435G22Rik	>sp|Q8VEA8|RAB7B_MOUSE Ras-related protein Rab-7b OS=Mus musculus GN=Rab7b PE=1 SV=1;>tr|D3YZQ6|D3YZQ6_MOUSE Protein 5430435G22Rik OS=Mus musculus GN=5430435G22Rik PE=4 SV=1;>sp|Q8VEA8-2|RAB7B_MOUSE Isoform 2 of Ras-related protein Rab-7b OS=Mus musculus G	4	2	2	2	0	0	2	0	0	0	2	0	0	0	2	0	16.1	16.1	16.1	22.502	199	199;106;157;85			2		2	2.1506e-05	0.71037	0.7206	52.267	2	NaN	NaN	NaN	0	NaN	NaN	NaN	0	0.71037	0.7206
P18911;D3YZY4	P18911;D3YZY4	1;1	1;1	1;1	Retinoic acid receptor gamma	Rarg	>sp|P18911|RARG_MOUSE Retinoic acid receptor gamma OS=Mus musculus GN=Rarg PE=1 SV=3;>tr|D3YZY4|D3YZY4_MOUSE Retinoic acid receptor gamma (Fragment) OS=Mus musculus GN=Rarg PE=3 SV=1	2	1	1	1	1	1	1	1	1	1	1	1	1	1	1	1	2.8	2.8	2.8	50.891	458	458;227	3	6	2	5	16	0.00026551	NaN	NaN	NaN	0	NaN	NaN	NaN	0	NaN	NaN	NaN	0	NaN	NaN
D3YZZ5;E9Q7G1	D3YZZ5;E9Q7G1	11;10	11;10	11;10		Tmed7	>tr|D3YZZ5|D3YZZ5_MOUSE Protein Tmed7 OS=Mus musculus GN=Tmed7 PE=3 SV=1;>tr|E9Q7G1|E9Q7G1_MOUSE Protein Tmed7 OS=Mus musculus GN=Tmed7 PE=3 SV=1	2	11	11	11	8	7	10	6	8	7	10	6	8	7	10	6	53.6	53.6	53.6	25.2	224	224;188	26	18	33	19	96	1.9907e-43	1.0233	1.3156	19.554	96	0.92575	1.4119	18.096	26	0.97685	1.4245	11.678	18	1.3141	1.2415
D3Z041;P41216;D3Z457;F6WNZ2	D3Z041;P41216	7;7;1;1	5;5;1;0	5;5;1;0	Long-chain-fatty-acid--CoA ligase 1	Acsl1	>tr|D3Z041|D3Z041_MOUSE Long-chain-fatty-acid--CoA ligase 1 OS=Mus musculus GN=Acsl1 PE=4 SV=1;>sp|P41216|ACSL1_MOUSE Long-chain-fatty-acid--CoA ligase 1 OS=Mus musculus GN=Acsl1 PE=1 SV=2	4	7	5	5	2	2	4	4	0	1	2	2	0	1	2	2	11.2	8.3	8.3	78.034	699	699;699;137;95		1	2	3	6	7.5981e-19	0.65398	0.62162	37.087	5	NaN	NaN	NaN	0	NaN	NaN	NaN	0	0.54403	0.516
Q8C7R4;D3Z061	Q8C7R4;D3Z061	43;43	43;43	43;43	Ubiquitin-like modifier-activating enzyme 6	Uba6	>sp|Q8C7R4|UBA6_MOUSE Ubiquitin-like modifier-activating enzyme 6 OS=Mus musculus GN=Uba6 PE=1 SV=1;>tr|D3Z061|D3Z061_MOUSE Ubiquitin-like modifier-activating enzyme 6 OS=Mus musculus GN=Uba6 PE=4 SV=1	2	43	43	43	36	30	27	30	36	30	27	30	36	30	27	30	54.9	54.9	54.9	117.96	1053	1053;1022	77	61	72	71	281	0	1.064	1.01	40.214	238	0.46671	0.65147	15.63	61	0.47842	0.63614	22.621	53	1.3944	1.3766
Q8K400;D3Z079;D3Z2Q2;Q8K400-2;F6WXQ4	Q8K400;D3Z079;D3Z2Q2;Q8K400-2;F6WXQ4	2;2;1;1;1	2;2;1;1;1	2;2;1;1;1	Syntaxin-binding protein 5	Stxbp5	>sp|Q8K400|STXB5_MOUSE Syntaxin-binding protein 5 OS=Mus musculus GN=Stxbp5 PE=1 SV=3;>tr|D3Z079|D3Z079_MOUSE Syntaxin-binding protein 5 OS=Mus musculus GN=Stxbp5 PE=4 SV=1;>tr|D3Z2Q2|D3Z2Q2_MOUSE Syntaxin-binding protein 5 OS=Mus musculus GN=Stxbp5 PE=4 S	5	2	2	2	1	1	0	0	1	1	0	0	1	1	0	0	3	3	3	127.65	1152	1152;1116;1099;398;264	1	4			5	5.0161e-08	NaN	NaN	NaN	0	NaN	NaN	NaN	0	NaN	NaN	NaN	0	NaN	NaN
D3Z081;Q8CHP0	D3Z081;Q8CHP0	4;4	4;4	4;4	Zinc finger CCCH domain-containing protein 3	Gm7353;Zc3h3	>tr|D3Z081|D3Z081_MOUSE Uncharacterized protein OS=Mus musculus GN=Gm7353 PE=4 SV=1;>sp|Q8CHP0|ZC3H3_MOUSE Zinc finger CCCH domain-containing protein 3 OS=Mus musculus GN=Zc3h3 PE=2 SV=1	2	4	4	4	1	3	1	0	1	3	1	0	1	3	1	0	4	4	4	103.26	950	950;950	5	4	5		14	1.5599e-08	1.7475	2.1565	13.044	4	NaN	NaN	NaN	0	1.7475	2.1565	13.044	4	NaN	NaN
D3Z099	D3Z099	7	1	1		Qdpr	>tr|D3Z099|D3Z099_MOUSE Dihydropteridine reductase (Fragment) OS=Mus musculus GN=Qdpr PE=4 SV=1	1	7	1	1	3	4	4	5	0	1	0	0	0	1	0	0	51.1	10.2	10.2	14.853	137	137		1			1	2.1973e-220	NaN	NaN	NaN	0	NaN	NaN	NaN	0	NaN	NaN	NaN	0	NaN	NaN
Q3U717;Q8BJZ3;Q8BJZ3-2;D3Z225;D3Z0A5	Q3U717;Q8BJZ3;Q8BJZ3-2;D3Z225;D3Z0A5	2;2;2;2;2	2;2;2;2;2	2;2;2;2;2	Protein lifeguard 3	Tmbim1	>tr|Q3U717|Q3U717_MOUSE Protein lifeguard 3 OS=Mus musculus GN=Tmbim1 PE=2 SV=1;>sp|Q8BJZ3|LFG3_MOUSE Protein lifeguard 3 OS=Mus musculus GN=Tmbim1 PE=1 SV=1;>sp|Q8BJZ3-2|LFG3_MOUSE Isoform 2 of Protein lifeguard 3 OS=Mus musculus GN=Tmbim1;>tr|D3Z225|D3Z2	5	2	2	2	1	1	2	1	1	1	2	1	1	1	2	1	4.9	4.9	4.9	34.379	309	309;309;164;98;93	8	8	5	8	29	2.7076e-07	NaN	NaN	NaN	0	NaN	NaN	NaN	0	NaN	NaN	NaN	0	NaN	NaN
O88545;D3Z0F5;F6QK86	O88545;D3Z0F5	16;16;6	16;16;6	16;16;6	COP9 signalosome complex subunit 6	Cops6	>sp|O88545|CSN6_MOUSE COP9 signalosome complex subunit 6 OS=Mus musculus GN=Cops6 PE=1 SV=1;>tr|D3Z0F5|D3Z0F5_MOUSE COP9 signalosome complex subunit 6 OS=Mus musculus GN=Cops6 PE=4 SV=1	3	16	16	16	15	6	15	5	15	6	15	5	15	6	15	5	60.8	60.8	60.8	35.88	324	324;297;122	34	13	31	12	90	2.1628e-140	0.67809	0.91781	30.625	90	0.50645	0.78555	11.211	34	0.53266	0.72927	16.497	13	1.3939	1.2971
Q99MD6;G3X8P6;D3Z0H7	Q99MD6;G3X8P6;D3Z0H7	1;1;1	1;1;1	1;1;1	Thioredoxin reductase 3	Txnrd3	>sp|Q99MD6|TRXR3_MOUSE Thioredoxin reductase 3 (Fragment) OS=Mus musculus GN=Txnrd3 PE=1 SV=2;>tr|G3X8P6|G3X8P6_MOUSE Thioredoxin reductase 3 OS=Mus musculus GN=Txnrd3 PE=3 SV=1;>tr|D3Z0H7|D3Z0H7_MOUSE Thioredoxin reductase 3 OS=Mus musculus GN=Txnrd3 PE=4	3	1	1	1	1	0	0	0	1	0	0	0	1	0	0	0	5.2	5.2	5.2	76.132	697	697;615;501	2				2	1.6826e-18	0.40426	0.6058	0.17752	2	0.40426	0.6058	0.17752	2	NaN	NaN	NaN	0	NaN	NaN
Q3UBX0;D3Z0I8;D3YX08;D3Z3Z2;D3Z7P2	Q3UBX0;D3Z0I8;D3YX08;D3Z3Z2;D3Z7P2	5;5;4;4;4	5;5;4;4;4	5;5;4;4;4	Transmembrane protein 109	Tmem109	>sp|Q3UBX0|TM109_MOUSE Transmembrane protein 109 OS=Mus musculus GN=Tmem109 PE=1 SV=2;>tr|D3Z0I8|D3Z0I8_MOUSE Transmembrane protein 109 (Fragment) OS=Mus musculus GN=Tmem109 PE=4 SV=1;>tr|D3YX08|D3YX08_MOUSE Transmembrane protein 109 OS=Mus musculus GN=Tme	5	5	5	5	4	3	5	3	4	3	5	3	4	3	5	3	12.3	12.3	12.3	26.306	243	243;213;115;93;73	7	9	13	9	38	2.934e-55	0.8691	0.83377	41.063	38	1.1133	1.613	25.033	7	1.2012	1.6716	11.366	9	0.79351	0.7579
D3Z0L8;D3Z761	D3Z0L8;D3Z761	15;11	1;1	1;1		Actn4	>tr|D3Z0L8|D3Z0L8_MOUSE Alpha-actinin-4 (Fragment) OS=Mus musculus GN=Actn4 PE=4 SV=1;>tr|D3Z761|D3Z761_MOUSE Alpha-actinin-4 (Fragment) OS=Mus musculus GN=Actn4 PE=4 SV=1	2	15	1	1	13	13	13	15	0	0	0	1	0	0	0	1	74.8	4.9	4.9	23.309	206	206;133				1	1	0	NaN	NaN	NaN	0	NaN	NaN	NaN	0	NaN	NaN	NaN	0	NaN	NaN
D3Z0M6;O88485;Q3TYJ3;O88485-2	D3Z0M6;O88485;Q3TYJ3;O88485-2	4;4;4;4	1;1;1;1	1;1;1;1	Cytoplasmic dynein 1 intermediate chain 1	Dync1i1	>tr|D3Z0M6|D3Z0M6_MOUSE Cytoplasmic dynein 1 intermediate chain 1 OS=Mus musculus GN=Dync1i1 PE=4 SV=1;>sp|O88485|DC1I1_MOUSE Cytoplasmic dynein 1 intermediate chain 1 OS=Mus musculus GN=Dync1i1 PE=1 SV=2;>tr|Q3TYJ3|Q3TYJ3_MOUSE Cytoplasmic dynein 1 interm	4	4	1	1	2	2	1	3	1	0	1	0	1	0	1	0	11.6	5.3	5.3	72.889	645	645;628;617;608	2		1		3	5.2749e-12	0.58415	0.86017	2.0454	3	0.58126	0.86383	2.8718	2	NaN	NaN	NaN	0	0.96042	0.86017
D3Z0M9	D3Z0M9	11	11	11		Ddx23	>tr|D3Z0M9|D3Z0M9_MOUSE MCG18410, isoform CRA_a OS=Mus musculus GN=Ddx23 PE=3 SV=1	1	11	11	11	6	4	6	6	6	4	6	6	6	4	6	6	16.2	16.2	16.2	95.493	819	819	9	7	6	16	38	4.1764e-52	0.94357	1.0095	23.17	36	0.93323	1.318	16.537	9	0.92491	1.2377	23.344	6	0.81962	0.80709
G3UWC5;P70284;P70284-2;D3Z0Q5;E0CYI0	G3UWC5;P70284;P70284-2;D3Z0Q5;E0CYI0	1;1;1;1;1	1;1;1;1;1	1;1;1;1;1	Homeobox protein TGIF1	Tgif1	>tr|G3UWC5|G3UWC5_MOUSE Homeobox protein TGIF1 OS=Mus musculus GN=Tgif1 PE=3 SV=1;>sp|P70284|TGIF1_MOUSE Homeobox protein TGIF1 OS=Mus musculus GN=Tgif1 PE=2 SV=2;>sp|P70284-2|TGIF1_MOUSE Isoform 2 of Homeobox protein TGIF1 OS=Mus musculus GN=Tgif1;>tr|D3Z	5	1	1	1	1	1	1	1	1	1	1	1	1	1	1	1	4.9	4.9	4.9	33.239	305	305;272;252;242;158	9	11	14	15	49	3.2823e-21	NaN	NaN	NaN	0	NaN	NaN	NaN	0	NaN	NaN	NaN	0	NaN	NaN
Q9Z1E4;D3Z0Q6	Q9Z1E4;D3Z0Q6	10;10	10;10	10;10	Glycogen [starch] synthase, muscle	Gys1	>sp|Q9Z1E4|GYS1_MOUSE Glycogen [starch] synthase, muscle OS=Mus musculus GN=Gys1 PE=1 SV=2;>tr|D3Z0Q6|D3Z0Q6_MOUSE Glycogen [starch] synthase, muscle OS=Mus musculus GN=Gys1 PE=4 SV=1	2	10	10	10	5	3	8	7	5	3	8	7	5	3	8	7	19.1	19.1	19.1	83.926	738	738;674	13	16	30	26	85	3.8781e-41	0.52681	0.59987	21.698	20	0.49506	0.73803	15.07	4	0.45657	0.61849	6.9748	2	0.58892	0.53645
Q8BGB2;D3Z0R8;D6RG81	Q8BGB2;D3Z0R8	4;4;1	4;4;1	4;4;1	Tetratricopeptide repeat protein 7A	Ttc7a;Ttc7	>sp|Q8BGB2|TTC7A_MOUSE Tetratricopeptide repeat protein 7A OS=Mus musculus GN=Ttc7a PE=1 SV=1;>tr|D3Z0R8|D3Z0R8_MOUSE Protein Ttc7 OS=Mus musculus GN=Ttc7 PE=4 SV=1	3	4	4	4	4	2	2	2	4	2	2	2	4	2	2	2	5.6	5.6	5.6	96.155	858	858;822;210	10	16	8	8	42	4.3032e-22	1.2841	1.6822	108.82	2	1.2841	1.6822	108.82	2	NaN	NaN	NaN	0	NaN	NaN
D3Z0T5	D3Z0T5	11	1	1		Cnpy4	>tr|D3Z0T5|D3Z0T5_MOUSE Protein canopy homolog 4 (Fragment) OS=Mus musculus GN=Cnpy4 PE=4 SV=1	1	11	1	1	6	7	9	8	0	0	0	1	0	0	0	1	56.9	6.2	6.2	18.056	160	160				1	1	4.3454e-159	1.3516	1.373	NaN	1	NaN	NaN	NaN	0	NaN	NaN	NaN	0	NaN	NaN
Q9ES28;Q9ES28-7;Q9ES28-2;Q9ES28-3;Q9ES28-4;Q9ES28-8;D3Z0V2;Q9ES28-5;Q9ES28-6;F6WMJ3;H3BJ53	Q9ES28;Q9ES28-7;Q9ES28-2;Q9ES28-3;Q9ES28-4;Q9ES28-8;D3Z0V2;Q9ES28-5;Q9ES28-6	18;18;18;18;18;18;18;16;16;3;1	18;18;18;18;18;18;18;16;16;3;1	15;15;15;15;15;15;15;13;13;0;0	Rho guanine nucleotide exchange factor 7	Arhgef7	>sp|Q9ES28|ARHG7_MOUSE Rho guanine nucleotide exchange factor 7 OS=Mus musculus GN=Arhgef7 PE=1 SV=2;>sp|Q9ES28-7|ARHG7_MOUSE Isoform G of Rho guanine nucleotide exchange factor 7 OS=Mus musculus GN=Arhgef7;>sp|Q9ES28-2|ARHG7_MOUSE Isoform A of Rho guanine	11	18	18	15	9	12	16	13	9	12	16	13	7	9	14	11	24.7	24.7	21.9	97.055	862	862;810;803;787;751;705;630;782;689;795;302	118	94	73	98	383	5.3601e-265	1.2078	1.1778	31.794	35	0.59995	0.8727	19.567	4	0.68008	0.93154	48.321	7	1.2526	1.2037
D3Z0X5;Q6PDH0-2;D3Z4N0;Q6PDH0;E9PWB1;F6RUK9;F6RYD0;E9PWW4;E9Q307;E9Q340;F7B296;F7AWU3;D3YVQ3	D3Z0X5;Q6PDH0-2;D3Z4N0;Q6PDH0;E9PWB1;F6RUK9	24;24;24;24;24;22;11;4;4;2;2;1;1	24;24;24;24;24;22;11;4;4;2;2;1;1	23;23;23;23;23;21;10;3;3;1;2;1;1	Pleckstrin homology-like domain family B member 1	Phldb1	>tr|D3Z0X5|D3Z0X5_MOUSE Pleckstrin homology-like domain family B member 1 OS=Mus musculus GN=Phldb1 PE=4 SV=1;>sp|Q6PDH0-2|PHLB1_MOUSE Isoform 2 of Pleckstrin homology-like domain family B member 1 OS=Mus musculus GN=Phldb1;>tr|D3Z4N0|D3Z4N0_MOUSE Pleckstr	13	24	24	23	18	17	18	17	18	17	18	17	18	17	17	17	18	18	17.5	158.69	1449	1449;1449;1382;1371;1324;1131;832;684;641;495;212;262;221	92	98	74	100	364	0	0.62286	0.58525	65.613	9	0.261	0.36542	NaN	1	0.37511	0.48535	NaN	1	1.3277	1.2647
D3Z0Y8;Q9CQX0;F6SXD2	D3Z0Y8;Q9CQX0;F6SXD2	1;1;1	1;1;1	1;1;1	Ubiquitin thioesterase OTUB2	Otub2	>tr|D3Z0Y8|D3Z0Y8_MOUSE Ubiquitin thioesterase OTUB2 OS=Mus musculus GN=Otub2 PE=4 SV=1;>sp|Q9CQX0|OTUB2_MOUSE Ubiquitin thioesterase OTUB2 OS=Mus musculus GN=Otub2 PE=2 SV=1;>tr|F6SXD2|F6SXD2_MOUSE Ubiquitin thioesterase OTUB2 (Fragment) OS=Mus musculus G	3	1	1	1	1	1	1	1	1	1	1	1	1	1	1	1	4	4	4	37.065	323	323;234;142	2	1	1	1	5	7.8938e-10	0.26403	0.37274	93.277	5	0.2552	0.35676	6.1959	2	0.25999	0.30957	NaN	1	2.0724	1.9805
Q8BHI7;D3Z136;D3Z0Z6	Q8BHI7;D3Z136;D3Z0Z6	1;1;1	1;1;1	1;1;1	Elongation of very long chain fatty acids protein 5	Elovl5	>sp|Q8BHI7|ELOV5_MOUSE Elongation of very long chain fatty acids protein 5 OS=Mus musculus GN=Elovl5 PE=1 SV=1;>tr|D3Z136|D3Z136_MOUSE Elongation of very long chain fatty acids protein 5 (Fragment) OS=Mus musculus GN=Elovl5 PE=4 SV=1;>tr|D3Z0Z6|D3Z0Z6_MOUS	3	1	1	1	0	0	1	0	0	0	1	0	0	0	1	0	4.3	4.3	4.3	35.332	299	299;180;71			11		11	2.2407e-06	0.68462	0.63722	10.231	11	NaN	NaN	NaN	0	NaN	NaN	NaN	0	0.68462	0.63722
D6REV1;F6WV21;Q8BZ32;D3Z112;D6RI62	D6REV1;F6WV21;Q8BZ32;D3Z112;D6RI62	2;2;2;2;2	2;2;2;2;2	2;2;2;2;2	Putative Polycomb group protein ASXL2	Asxl2	>tr|D6REV1|D6REV1_MOUSE Putative Polycomb group protein ASXL2 OS=Mus musculus GN=Asxl2 PE=4 SV=2;>tr|F6WV21|F6WV21_MOUSE Putative Polycomb group protein ASXL2 OS=Mus musculus GN=Asxl2 PE=4 SV=1;>sp|Q8BZ32|ASXL2_MOUSE Putative Polycomb group protein ASXL2 O	5	2	2	2	0	2	1	1	0	2	1	1	0	2	1	1	2.1	2.1	2.1	147.06	1370	1370;1370;1370;597;404		2	2	1	5	6.2349e-06	0.59888	0.77749	NaN	1	NaN	NaN	NaN	0	0.59888	0.77749	NaN	1	NaN	NaN
Q62393;D3Z7X7;Q62393-2;D3Z125;D3Z637;F8WHQ1;Q62393-3;E9PUA7;D3Z2U2	Q62393;D3Z7X7;Q62393-2;D3Z125;D3Z637;F8WHQ1;Q62393-3;E9PUA7	8;8;8;8;8;7;7;7;3	8;8;8;8;8;7;7;7;3	8;8;8;8;8;7;7;7;3	Tumor protein D52	Tpd52	>sp|Q62393|TPD52_MOUSE Tumor protein D52 OS=Mus musculus GN=Tpd52 PE=1 SV=2;>tr|D3Z7X7|D3Z7X7_MOUSE Tumor protein D52 (Fragment) OS=Mus musculus GN=Tpd52 PE=4 SV=1;>sp|Q62393-2|TPD52_MOUSE Isoform 2 of Tumor protein D52 OS=Mus musculus GN=Tpd52;>tr|D3Z125|	9	8	8	8	4	4	8	5	4	4	8	5	4	4	8	5	33.5	33.5	33.5	24.313	224	224;206;185;179;162;247;199;194;77	5	7	17	15	44	4.6077e-45	0.98416	0.91605	45.309	24	0.45011	0.67924	13.047	4	0.54776	0.74057	7.5439	5	1.0471	0.95418
D3Z175	D3Z175	1	1	1		Gm5519	>tr|D3Z175|D3Z175_MOUSE MCG142459 OS=Mus musculus GN=Gm5519 PE=3 SV=1	1	1	1	1	1	0	0	0	1	0	0	0	1	0	0	0	6.5	6.5	6.5	19.532	170	170	1				1	0.013206	NaN	NaN	NaN	0	NaN	NaN	NaN	0	NaN	NaN	NaN	0	NaN	NaN
D3Z357;Q6P2L6;D3Z197;Q6P2L6-2;Q6P2L6-4;D3YUP2;Q6P2L6-3	D3Z357;Q6P2L6;D3Z197;Q6P2L6-2;Q6P2L6-4	6;6;6;4;4;1;1	6;6;6;4;4;1;1	6;6;6;4;4;1;1	Histone-lysine N-methyltransferase NSD3	Whsc1l1	>tr|D3Z357|D3Z357_MOUSE Histone-lysine N-methyltransferase NSD3 OS=Mus musculus GN=Whsc1l1 PE=4 SV=1;>sp|Q6P2L6|NSD3_MOUSE Histone-lysine N-methyltransferase NSD3 OS=Mus musculus GN=Whsc1l1 PE=1 SV=2;>tr|D3Z197|D3Z197_MOUSE Histone-lysine N-methyltransfera	7	6	6	6	3	5	3	4	3	5	3	4	3	5	3	4	4.8	4.8	4.8	161.65	1446	1446;1439;1397;655;621;495;484	8	15	7	18	48	3.3267e-40	NaN	NaN	NaN	0	NaN	NaN	NaN	0	NaN	NaN	NaN	0	NaN	NaN
P70662;P70662-3;D3Z1C5;P70662-2	P70662;P70662-3;D3Z1C5;P70662-2	2;2;2;2	2;2;2;2	2;2;2;2	LIM domain-binding protein 1	Ldb1	>sp|P70662|LDB1_MOUSE LIM domain-binding protein 1 OS=Mus musculus GN=Ldb1 PE=1 SV=2;>sp|P70662-3|LDB1_MOUSE Isoform 3 of LIM domain-binding protein 1 OS=Mus musculus GN=Ldb1;>tr|D3Z1C5|D3Z1C5_MOUSE LIM domain-binding protein 1 OS=Mus musculus GN=Ldb1 PE=4	4	2	2	2	1	1	1	2	1	1	1	2	1	1	1	2	8.8	8.8	8.8	46.502	411	411;375;373;319	2	1	5	7	15	4.6315e-37	NaN	NaN	NaN	0	NaN	NaN	NaN	0	NaN	NaN	NaN	0	NaN	NaN
Q8C0M0-3;Q8C0M0;D3Z1F9;Q8C0M0-2	Q8C0M0-3;Q8C0M0;D3Z1F9;Q8C0M0-2	3;3;3;3	3;3;3;3	3;3;3;3	WD repeat-containing protein 59	Wdr59	>sp|Q8C0M0-3|WDR59_MOUSE Isoform 3 of WD repeat-containing protein 59 OS=Mus musculus GN=Wdr59;>sp|Q8C0M0|WDR59_MOUSE WD repeat-containing protein 59 OS=Mus musculus GN=Wdr59 PE=1 SV=2;>tr|D3Z1F9|D3Z1F9_MOUSE WD repeat domain 59, isoform CRA_b OS=Mus muscu	4	3	3	3	1	2	2	1	1	2	2	1	1	2	2	1	3.3	3.3	3.3	112.07	993	993;992;991;974	1	4	3	2	10	7.9636e-08	1.0709	1.0199	NaN	1	NaN	NaN	NaN	0	NaN	NaN	NaN	0	1.0709	1.0199
Q9D273;D3Z1G7;Q9D273-2	Q9D273;D3Z1G7;Q9D273-2	2;2;1	2;2;1	2;2;1	Cob(I)yrinic acid a,c-diamide adenosyltransferase, mitochondrial	Mmab	>sp|Q9D273|MMAB_MOUSE Cob(I)yrinic acid a,c-diamide adenosyltransferase, mitochondrial OS=Mus musculus GN=Mmab PE=2 SV=1;>tr|D3Z1G7|D3Z1G7_MOUSE Cob(I)yrinic acid a,c-diamide adenosyltransferase, mitochondrial OS=Mus musculus GN=Mmab PE=4 SV=1;>sp|Q9D273-2	3	2	2	2	1	1	1	1	1	1	1	1	1	1	1	1	12.2	12.2	12.2	26.273	237	237;180;257	2	2	1	1	6	2.575e-06	1.1483	1.6212	47.169	5	1.5009	2.2647	NaN	1	1.2108	1.668	4.0196	2	0.94572	0.90246
E9PVA6;Q9JLQ2;D3Z1I2;J3QK07;Q80XR8;F7BIK4;F6WV69;F6U8T2	E9PVA6;Q9JLQ2;D3Z1I2;J3QK07;Q80XR8;F7BIK4;F6WV69	3;3;3;3;3;3;2;1	2;2;2;2;2;2;1;1	2;2;2;2;2;2;1;1	ARF GTPase-activating protein GIT2	Git2	>tr|E9PVA6|E9PVA6_MOUSE ARF GTPase-activating protein GIT2 OS=Mus musculus GN=Git2 PE=4 SV=1;>sp|Q9JLQ2|GIT2_MOUSE ARF GTPase-activating protein GIT2 OS=Mus musculus GN=Git2 PE=1 SV=2;>tr|D3Z1I2|D3Z1I2_MOUSE ARF GTPase-activating protein GIT2 OS=Mus muscul	8	3	2	2	1	1	2	2	0	1	2	2	0	1	2	2	8	6.1	6.1	84.456	759	759;708;681;680;679;603;249;311		4	5	4	13	7.0267e-11	1.1109	1.0516	9.5371	13	NaN	NaN	NaN	0	0.80786	1.0156	5.2304	4	1.1171	1.0553
F8VQD1;E9Q4Y5;D3Z1N4;Q8BSQ9;Q8BSQ9-2;E9Q7L2;E9Q7L3;D3YYF2;D3Z1W6;F6THL5;D3Z3R4;D6RI94;D6RIL0;D3Z1M8;D3YYG4	F8VQD1;E9Q4Y5;D3Z1N4;Q8BSQ9;Q8BSQ9-2;E9Q7L2;E9Q7L3;D3YYF2;D3Z1W6;F6THL5	4;4;4;3;3;3;3;3;2;2;1;1;1;1;1	4;4;4;3;3;3;3;3;2;2;1;1;1;1;1	4;4;4;3;3;3;3;3;2;2;1;1;1;1;1	Protein polybromo-1	Pbrm1	>tr|F8VQD1|F8VQD1_MOUSE Protein polybromo-1 OS=Mus musculus GN=Pbrm1 PE=4 SV=1;>tr|E9Q4Y5|E9Q4Y5_MOUSE Protein polybromo-1 OS=Mus musculus GN=Pbrm1 PE=4 SV=1;>tr|D3Z1N4|D3Z1N4_MOUSE Protein polybromo-1 OS=Mus musculus GN=Pbrm1 PE=4 SV=1;>sp|Q8BSQ9|PB1_MOUS	15	4	4	4	1	3	3	4	1	3	3	4	1	3	3	4	3.3	3.3	3.3	194.71	1704	1704;1689;1652;1634;1602;1597;1582;1461;1582;1085;931;860;856;91;84	5	13	8	17	43	8.5529e-23	NaN	NaN	NaN	0	NaN	NaN	NaN	0	NaN	NaN	NaN	0	NaN	NaN
P97496;Q3UNN4;P97496-2;D3Z1X8;Q3UZD0	P97496;Q3UNN4;P97496-2;D3Z1X8	33;33;33;33;14	33;33;33;33;14	26;26;26;26;14	SWI/SNF complex subunit SMARCC1	Smarcc1	>sp|P97496|SMRC1_MOUSE SWI/SNF complex subunit SMARCC1 OS=Mus musculus GN=Smarcc1 PE=1 SV=2;>tr|Q3UNN4|Q3UNN4_MOUSE SWI/SNF complex subunit SMARCC1 OS=Mus musculus GN=Smarcc1 PE=2 SV=1;>sp|P97496-2|SMRC1_MOUSE Isoform 2 of SWI/SNF complex subunit SMARCC1 O	5	33	33	26	22	17	19	17	22	17	19	17	17	13	14	14	39.2	39.2	33.7	122.89	1104	1104;1098;1075;952;485	69	78	55	82	284	0	0.79277	0.88261	77.028	106	0.27879	0.37608	48.259	29	0.32821	0.42853	44.606	27	2.1556	2.1316
D3Z1Y5;Q8BL80-2;Q8BL80-3	D3Z1Y5;Q8BL80-2;Q8BL80-3	6;5;5	6;5;5	1;0;0		Arhgap22	>tr|D3Z1Y5|D3Z1Y5_MOUSE Rho GTPase activating protein 22 OS=Mus musculus GN=Arhgap22 PE=4 SV=1;>sp|Q8BL80-2|RHG22_MOUSE Isoform 2 of Rho GTPase-activating protein 22 OS=Mus musculus GN=Arhgap22;>sp|Q8BL80-3|RHG22_MOUSE Isoform 3 of Rho GTPase-activating pr	3	6	6	1	5	2	4	4	5	2	4	4	1	0	0	0	10.6	10.6	1.3	58.889	537	537;571;502	17	6	15	11	49	3.529e-37	8.4941	10.876	169.8	4	8.5952	11.084	41.052	3	NaN	NaN	NaN	0	NaN	NaN
Q99K90;D3Z216;D3Z564	Q99K90;D3Z216;D3Z564	1;1;1	1;1;1	1;1;1	TGF-beta-activated kinase 1 and MAP3K7-binding protein 2	Tab2	>sp|Q99K90|TAB2_MOUSE TGF-beta-activated kinase 1 and MAP3K7-binding protein 2 OS=Mus musculus GN=Tab2 PE=1 SV=1;>tr|D3Z216|D3Z216_MOUSE TGF-beta-activated kinase 1 and MAP3K7-binding protein 2 (Fragment) OS=Mus musculus GN=Tab2 PE=4 SV=1;>tr|D3Z564|D3Z564	3	1	1	1	1	1	1	1	1	1	1	1	1	1	1	1	1.6	1.6	1.6	76.441	693	693;553;385	5	7	4	7	23	6.5969e-15	NaN	NaN	NaN	0	NaN	NaN	NaN	0	NaN	NaN	NaN	0	NaN	NaN
G3UW67;Q9JIB0;D3Z237	G3UW67;Q9JIB0;D3Z237	1;1;1	1;1;1	1;1;1	Ran guanine nucleotide release factor	Gm4535;Rangrf;Gm10355	>tr|G3UW67|G3UW67_MOUSE MCG133827 OS=Mus musculus GN=Gm4535 PE=4 SV=1;>sp|Q9JIB0|MOG1_MOUSE Ran guanine nucleotide release factor OS=Mus musculus GN=Rangrf PE=1 SV=1;>tr|D3Z237|D3Z237_MOUSE Uncharacterized protein OS=Mus musculus GN=Gm10355 PE=4 SV=1	3	1	1	1	1	0	1	1	1	0	1	1	1	0	1	1	9.7	9.7	9.7	20.425	185	185;185;172	2		2	2	6	0.00018333	0.7375	0.76178	9.1058	6	0.5373	0.76803	2.3127	2	NaN	NaN	NaN	0	0.83805	0.81717
D3Z285	D3Z285	4	1	1		Nfu1	>tr|D3Z285|D3Z285_MOUSE NFU1 iron-sulfur cluster scaffold homolog, mitochondrial (Fragment) OS=Mus musculus GN=Nfu1 PE=4 SV=1	1	4	1	1	3	4	3	3	1	1	1	1	1	1	1	1	25.6	7.5	7.5	22.028	199	199	2	3	5	1	11	1.5727e-113	0.887	0.86519	31.132	11	1.057	1.5808	6.1601	2	0.98358	1.3053	15.829	3	0.86957	0.77823
O54916;E9Q632;D3Z2E3;F6R6F1;O54916-4;O54916-3;D6RIN6;F6YT69;O54916-2;B9EI38;A2AFI8;Q80XA6;B1AV20;F7AB82	O54916;E9Q632;D3Z2E3;F6R6F1;O54916-4;O54916-3	12;12;12;11;11;11;3;3;3;1;1;1;1;1	12;12;12;11;11;11;3;3;3;1;1;1;1;1	12;12;12;11;11;11;3;3;3;1;1;1;1;1	RalBP1-associated Eps domain-containing protein 1	Reps1	>sp|O54916|REPS1_MOUSE RalBP1-associated Eps domain-containing protein 1 OS=Mus musculus GN=Reps1 PE=1 SV=2;>tr|E9Q632|E9Q632_MOUSE RalBP1-associated Eps domain-containing protein 1 OS=Mus musculus GN=Reps1 PE=4 SV=1;>tr|D3Z2E3|D3Z2E3_MOUSE RalBP1-associat	14	12	12	12	4	6	6	5	4	6	6	5	4	6	6	5	19.2	19.2	19.2	86.518	795	795;768;705;755;743;716;220;211;210;648;647;521;518;240	14	13	18	8	53	4.7561e-37	0.94428	1.0517	37.581	9	0.33814	0.4538	NaN	1	0.70292	0.85711	28.932	2	1.0469	1.0931
E9Q3L4;D3Z2E7	E9Q3L4;D3Z2E7	2;2	1;1	1;1		AI607873	>tr|E9Q3L4|E9Q3L4_MOUSE Protein AI607873 OS=Mus musculus GN=AI607873 PE=4 SV=2;>tr|D3Z2E7|D3Z2E7_MOUSE Protein AI607873 OS=Mus musculus GN=AI607873 PE=4 SV=1	2	2	1	1	1	1	2	0	1	1	1	0	1	1	1	0	3.3	1.2	1.2	104.49	978	978;971	2	1	2		5	1.1971e-44	0.26339	0.33925	140.2	5	0.19832	0.27858	11.799	2	0.26339	0.33925	NaN	1	4.1521	3.8197
Q99PU8-3;Q99PU8;Q99PU8-2;D3Z2J3;D3Z1G8;D3YXL7	Q99PU8-3;Q99PU8;Q99PU8-2;D3Z2J3	26;26;26;26;4;1	26;26;26;26;4;1	26;26;26;26;4;1	Putative ATP-dependent RNA helicase DHX30	Dhx30	>sp|Q99PU8-3|DHX30_MOUSE Isoform 3 of Putative ATP-dependent RNA helicase DHX30 OS=Mus musculus GN=Dhx30;>sp|Q99PU8|DHX30_MOUSE Putative ATP-dependent RNA helicase DHX30 OS=Mus musculus GN=Dhx30 PE=2 SV=1;>sp|Q99PU8-2|DHX30_MOUSE Isoform 2 of Putative ATP-	6	26	26	26	1	10	20	16	1	10	20	16	1	10	20	16	25.9	25.9	25.9	136.49	1223	1223;1217;1194;1186;175;101	1	14	28	24	67	1.0764e-76	0.91014	0.92439	15.099	64	0.67207	0.87275	NaN	1	0.84331	1.104	14.096	14	0.90993	0.90976
Q64362;D3Z632;D3Z2J4	Q64362;D3Z632;D3Z2J4	2;2;2	2;2;2	2;2;2	AKT-interacting protein	Aktip	>sp|Q64362|AKTIP_MOUSE AKT-interacting protein OS=Mus musculus GN=Aktip PE=2 SV=1;>tr|D3Z632|D3Z632_MOUSE AKT-interacting protein OS=Mus musculus GN=Aktip PE=4 SV=1;>tr|D3Z2J4|D3Z2J4_MOUSE AKT-interacting protein (Fragment) OS=Mus musculus GN=Aktip PE=4 SV	3	2	2	2	0	0	1	1	0	0	1	1	0	0	1	1	7.9	7.9	7.9	32.941	292	292;277;273			1	2	3	4.6755e-07	0.61034	0.5631	12.326	3	NaN	NaN	NaN	0	NaN	NaN	NaN	0	0.55487	0.50781
Q9CR88;D3Z2K2	Q9CR88;D3Z2K2	2;2	2;2	2;2	28S ribosomal protein S14, mitochondrial	Mrps14	>sp|Q9CR88|RT14_MOUSE 28S ribosomal protein S14, mitochondrial OS=Mus musculus GN=Mrps14 PE=2 SV=1;>tr|D3Z2K2|D3Z2K2_MOUSE 28S ribosomal protein S14, mitochondrial OS=Mus musculus GN=Mrps14 PE=4 SV=1	2	2	2	2	0	2	0	1	0	2	0	1	0	2	0	1	17.2	17.2	17.2	14.92	128	128;122		3		4	7	3.911e-06	0.77057	0.80748	33.238	7	NaN	NaN	NaN	0	0.87173	1.3164	18.999	3	NaN	NaN
D3Z2R5	D3Z2R5	3	3	3		Sepn1	>tr|D3Z2R5|D3Z2R5_MOUSE Protein Sepn1 OS=Mus musculus GN=Sepn1 PE=4 SV=1	1	3	3	3	2	2	3	2	2	2	3	2	2	2	3	2	8.8	8.8	8.8	62.445	557	557	6	7	7	12	32	8.3806e-97	0.62463	0.60049	63.621	17	1.7044	2.3362	NaN	1	1.9835	2.4126	1.527	3	0.56462	0.54032
Q61009;D3Z2V4;F7C5U2	Q61009;D3Z2V4	6;6;1	6;6;1	6;6;1	Scavenger receptor class B member 1	Scarb1	>sp|Q61009|SCRB1_MOUSE Scavenger receptor class B member 1 OS=Mus musculus GN=Scarb1 PE=1 SV=1;>tr|D3Z2V4|D3Z2V4_MOUSE Scavenger receptor class B member 1 OS=Mus musculus GN=Scarb1 PE=4 SV=1	3	6	6	6	5	2	5	2	5	2	5	2	5	2	5	2	21.8	21.8	21.8	56.753	509	509;506;176	11	4	11	6	32	6.57e-27	1.0807	1.1664	40.038	31	1.1113	1.5586	12.507	11	0.93507	1.3547	14.113	4	0.92346	0.84035
E9QM75;Q9WUU8;D3Z2W0;Q9WUU8-3;Q9WUU8-2;D3Z3B6	E9QM75;Q9WUU8;D3Z2W0;Q9WUU8-3;Q9WUU8-2;D3Z3B6	1;1;1;1;1;1	1;1;1;1;1;1	1;1;1;1;1;1	TNFAIP3-interacting protein 1	Tnip1	>tr|E9QM75|E9QM75_MOUSE TNFAIP3-interacting protein 1 OS=Mus musculus GN=Tnip1 PE=4 SV=1;>sp|Q9WUU8|TNIP1_MOUSE TNFAIP3-interacting protein 1 OS=Mus musculus GN=Tnip1 PE=1 SV=1;>tr|D3Z2W0|D3Z2W0_MOUSE TNFAIP3-interacting protein 1 OS=Mus musculus GN=Tnip1	6	1	1	1	1	1	1	0	1	1	1	0	1	1	1	0	2.6	2.6	2.6	72.95	647	647;647;646;646;594;272	4	3	5		12	2.7108e-06	NaN	NaN	NaN	0	NaN	NaN	NaN	0	NaN	NaN	NaN	0	NaN	NaN
Q9D708;D3Z2Y6	Q9D708;D3Z2Y6	3;3	3;3	3;3		S100a16	>tr|Q9D708|Q9D708_MOUSE Protein S100a16 OS=Mus musculus GN=S100a16 PE=2 SV=1;>tr|D3Z2Y6|D3Z2Y6_MOUSE Protein S100a16 (Fragment) OS=Mus musculus GN=S100a16 PE=4 SV=1	2	3	3	3	2	3	3	3	2	3	3	3	2	3	3	3	25.8	25.8	25.8	14.324	124	124;73	3	6	5	6	20	1.7751e-19	0.14863	0.13741	288.72	20	12.379	17.791	16.873	3	10.297	15.275	39.601	6	0.039475	0.037303
F8WIA1;D3Z2Z1;Q922J3;Q922J3-2;D3Z3M7;F6RCU2;Q8C0S5;F6RAY2	F8WIA1;D3Z2Z1;Q922J3;Q922J3-2;D3Z3M7;F6RCU2;Q8C0S5	37;37;37;34;33;24;20;5	32;32;32;29;28;20;18;5	23;23;23;20;19;11;17;5	CAP-Gly domain-containing linker protein 1	Clip1	>tr|F8WIA1|F8WIA1_MOUSE CAP-Gly domain-containing linker protein 1 OS=Mus musculus GN=Clip1 PE=4 SV=1;>tr|D3Z2Z1|D3Z2Z1_MOUSE CAP-Gly domain-containing linker protein 1 OS=Mus musculus GN=Clip1 PE=4 SV=1;>sp|Q922J3|CLIP1_MOUSE CAP-Gly domain-containing lin	8	37	32	23	24	22	24	25	20	19	19	22	15	12	14	17	29.9	26.7	19.4	161.23	1437	1437;1426;1391;1315;1320;1066;840;172	40	26	34	37	137	0	0.79563	0.90002	42.899	129	0.96965	1.2743	38.969	37	1.105	1.4493	20.065	24	0.61397	0.59966
Q8CIG3;Q8CIG3-2;D3Z353	Q8CIG3;Q8CIG3-2;D3Z353	1;1;1	1;1;1	1;1;1	Lysine-specific histone demethylase 1B	Kdm1b	>sp|Q8CIG3|KDM1B_MOUSE Lysine-specific histone demethylase 1B OS=Mus musculus GN=Kdm1b PE=1 SV=1;>sp|Q8CIG3-2|KDM1B_MOUSE Isoform 2 of Lysine-specific histone demethylase 1B OS=Mus musculus GN=Kdm1b;>tr|D3Z353|D3Z353_MOUSE Lysine-specific histone demethyla	3	1	1	1	0	1	1	0	0	1	1	0	0	1	1	0	1.6	1.6	1.6	92.632	826	826;726;176		2	2		4	2.556e-34	NaN	NaN	NaN	0	NaN	NaN	NaN	0	NaN	NaN	NaN	0	NaN	NaN
Q921C5-2;Q921C5;D3Z390;Q921C5-3	Q921C5-2;Q921C5;D3Z390	11;11;11;4	11;11;11;4	11;11;11;4	Protein bicaudal D homolog 2	Bicd2	>sp|Q921C5-2|BICD2_MOUSE Isoform 2 of Protein bicaudal D homolog 2 OS=Mus musculus GN=Bicd2;>sp|Q921C5|BICD2_MOUSE Protein bicaudal D homolog 2 OS=Mus musculus GN=Bicd2 PE=1 SV=1;>tr|D3Z390|D3Z390_MOUSE Bicaudal D homolog 2 (Drosophila), isoform CRA_a OS=M	4	11	11	11	8	2	8	4	8	2	8	4	8	2	8	4	14.6	14.6	14.6	96.646	851	851;820;746;338	21	7	15	11	54	9.3094e-33	1.0135	1.0294	77.888	17	1.0995	1.4521	95.275	9	NaN	NaN	NaN	0	1.0135	1.0197
Q9DCL8;D3Z3A0	Q9DCL8;D3Z3A0	7;7	7;7	7;7	Protein phosphatase inhibitor 2	Ppp1r2	>sp|Q9DCL8|IPP2_MOUSE Protein phosphatase inhibitor 2 OS=Mus musculus GN=Ppp1r2 PE=1 SV=3;>tr|D3Z3A0|D3Z3A0_MOUSE MCG126099, isoform CRA_b OS=Mus musculus GN=Ppp1r2 PE=4 SV=1	2	7	7	7	3	5	6	6	3	5	6	6	3	5	6	6	31.6	31.6	31.6	23.119	206	206;195	5	11	12	14	42	7.6996e-65	0.93725	0.85931	48.365	30	0.36039	0.49746	25.211	3	0.4251	0.51701	46.276	7	0.99704	1.0472
D3Z3A8;Q8C170-2;Q8C170	D3Z3A8;Q8C170-2;Q8C170	7;7;7	7;7;7	7;7;7	Unconventional myosin-IXa	Myo9a	>tr|D3Z3A8|D3Z3A8_MOUSE Unconventional myosin-IXa OS=Mus musculus GN=Myo9a PE=4 SV=1;>sp|Q8C170-2|MYO9A_MOUSE Isoform 2 of Unconventional myosin-IXa OS=Mus musculus GN=Myo9a;>sp|Q8C170|MYO9A_MOUSE Unconventional myosin-IXa OS=Mus musculus GN=Myo9a PE=1 SV=	3	7	7	7	6	5	4	4	6	5	4	4	6	5	4	4	3	3	3	301.83	2631	2631;2613;2542	29	20	19	21	89	1.2812e-37	0.12159	0.1486	NaN	1	NaN	NaN	NaN	0	0.12159	0.1486	NaN	1	NaN	NaN
D3Z4V2;D3Z3F1;Q9D824;Q9D824-2;Q9D824-3;D3Z619;Q9D824-4	D3Z4V2;D3Z3F1;Q9D824;Q9D824-2;Q9D824-3;D3Z619;Q9D824-4	9;9;9;8;8;8;6	9;9;9;8;8;8;6	9;9;9;8;8;8;6	Pre-mRNA 3-end-processing factor FIP1	Fip1l1	>tr|D3Z4V2|D3Z4V2_MOUSE Pre-mRNA 3-end-processing factor FIP1 OS=Mus musculus GN=Fip1l1 PE=4 SV=1;>tr|D3Z3F1|D3Z3F1_MOUSE Pre-mRNA 3-end-processing factor FIP1 OS=Mus musculus GN=Fip1l1 PE=4 SV=1;>sp|Q9D824|FIP1_MOUSE Pre-mRNA 3-end-processing factor FI	7	9	9	9	8	6	6	4	8	6	6	4	8	6	6	4	21.8	21.8	21.8	66.64	595	595;589;581;545;536;530;508	42	49	53	35	179	1.5503e-206	0.37901	0.52574	54.389	19	0.30722	0.43315	18.456	8	0.37141	0.49432	20.64	5	1.4533	1.321
D3Z3Q3;Q921U8;Q921U8-2;Q921U8-3;Q921U8-4;D3YZ10;D3Z525	D3Z3Q3;Q921U8;Q921U8-2	6;6;6;2;2;1;1	6;6;6;2;2;1;1	5;5;5;1;1;1;1	Smoothelin	Smtn	>tr|D3Z3Q3|D3Z3Q3_MOUSE Smoothelin OS=Mus musculus GN=Smtn PE=4 SV=1;>sp|Q921U8|SMTN_MOUSE Smoothelin OS=Mus musculus GN=Smtn PE=2 SV=2;>sp|Q921U8-2|SMTN_MOUSE Isoform L2 of Smoothelin OS=Mus musculus GN=Smtn	7	6	6	5	3	2	4	0	3	2	4	0	2	2	3	0	8	8	6.7	103.04	946	946;923;921;469;467;141;122	6	3	10		19	3.2386e-13	0.46103	0.63006	22.723	3	0.42365	0.58402	10.729	2	NaN	NaN	NaN	0	0.94149	0.84635
Q9WUQ2;D3Z3S1;F6XLZ3	Q9WUQ2;D3Z3S1	9;9;2	9;9;2	9;9;2	Prolactin regulatory element-binding protein	Preb	>sp|Q9WUQ2|PREB_MOUSE Prolactin regulatory element-binding protein OS=Mus musculus GN=Preb PE=1 SV=1;>tr|D3Z3S1|D3Z3S1_MOUSE Prolactin regulatory element binding, isoform CRA_b OS=Mus musculus GN=Preb PE=4 SV=1	3	9	9	9	5	2	7	5	5	2	7	5	5	2	7	5	31.7	31.7	31.7	45.437	417	417;350;95	7	2	11	8	28	3.4497e-223	1.0024	1.043	18.535	28	0.78236	0.85826	14.905	7	0.71783	0.89067	10.51	2	1.0076	1.0379
G3X9X7;O54967;D3Z3U6;O54967-3;D3Z3U5;O54967-2;D3Z3U7	G3X9X7;O54967;D3Z3U6;O54967-3;D3Z3U5;O54967-2;D3Z3U7	4;4;4;4;4;4;4	4;4;4;4;4;4;4	4;4;4;4;4;4;4	Activated CDC42 kinase 1	Tnk2	>tr|G3X9X7|G3X9X7_MOUSE Activated CDC42 kinase 1 OS=Mus musculus GN=Tnk2 PE=3 SV=1;>sp|O54967|ACK1_MOUSE Activated CDC42 kinase 1 OS=Mus musculus GN=Tnk2 PE=1 SV=2;>tr|D3Z3U6|D3Z3U6_MOUSE Activated CDC42 kinase 1 OS=Mus musculus GN=Tnk2 PE=3 SV=1;>sp|O5496	7	4	4	4	3	2	4	3	3	2	4	3	3	2	4	3	5.2	5.2	5.2	117	1055	1055;1055;1040;1040;1023;1008;550	15	7	8	12	42	1.6786e-51	NaN	NaN	NaN	0	NaN	NaN	NaN	0	NaN	NaN	NaN	0	NaN	NaN
Q11204;D3Z3V2	Q11204;D3Z3V2	2;2	2;2	2;2	CMP-N-acetylneuraminate-beta-galactosamide-alpha-2,3-sialyltransferase 2	St3gal2	>sp|Q11204|SIA4B_MOUSE CMP-N-acetylneuraminate-beta-galactosamide-alpha-2,3-sialyltransferase 2 OS=Mus musculus GN=St3gal2 PE=2 SV=2;>tr|D3Z3V2|D3Z3V2_MOUSE CMP-N-acetylneuraminate-beta-galactosamide-alpha-2,3-sialyltransferase 2 OS=Mus musculus GN=St3gal2	2	2	2	2	0	0	2	0	0	0	2	0	0	0	2	0	6	6	6	40.129	350	350;303			2		2	1.1995e-05	0.62088	0.677	27.026	2	NaN	NaN	NaN	0	NaN	NaN	NaN	0	0.62088	0.677
Q99N95;D3Z456;F6W7C7	Q99N95;D3Z456;F6W7C7	8;8;6	8;8;6	8;8;6	39S ribosomal protein L3, mitochondrial	Mrpl3	>sp|Q99N95|RM03_MOUSE 39S ribosomal protein L3, mitochondrial OS=Mus musculus GN=Mrpl3 PE=2 SV=1;>tr|D3Z456|D3Z456_MOUSE 39S ribosomal protein L3, mitochondrial OS=Mus musculus GN=Mrpl3 PE=3 SV=1;>tr|F6W7C7|F6W7C7_MOUSE 39S ribosomal protein L3, mitochondr	3	8	8	8	4	2	7	1	4	2	7	1	4	2	7	1	29.9	29.9	29.9	39.109	348	348;304;114	5	2	11	1	19	5.8567e-44	0.83956	0.83109	33.145	19	0.94559	1.4819	37.856	5	0.90782	1.1287	2.4022	2	0.81461	0.76162
Q6P9N1;D3Z481;Q3TTP7	Q6P9N1;D3Z481;Q3TTP7	3;3;3	3;3;3	3;3;3	Hyccin	Fam126a	>sp|Q6P9N1|HYCCI_MOUSE Hyccin OS=Mus musculus GN=Fam126a PE=1 SV=2;>tr|D3Z481|D3Z481_MOUSE Hyccin OS=Mus musculus GN=Fam126a PE=4 SV=1;>tr|Q3TTP7|Q3TTP7_MOUSE Hyccin OS=Mus musculus GN=Fam126a PE=2 SV=1	3	3	3	3	1	0	1	1	1	0	1	1	1	0	1	1	6.7	6.7	6.7	57.306	521	521;420;370	3		1	1	5	7.5408e-08	7.0914	6.9677	NaN	1	NaN	NaN	NaN	0	NaN	NaN	NaN	0	NaN	NaN
Q9WTZ1;D3Z497	Q9WTZ1;D3Z497	1;1	1;1	1;1	RING-box protein 2	Rnf7;Gm7075	>sp|Q9WTZ1|RBX2_MOUSE RING-box protein 2 OS=Mus musculus GN=Rnf7 PE=2 SV=1;>tr|D3Z497|D3Z497_MOUSE Uncharacterized protein OS=Mus musculus GN=Gm7075 PE=4 SV=1	2	1	1	1	0	0	0	1	0	0	0	1	0	0	0	1	10.6	10.6	10.6	12.707	113	113;112				2	2	1.5743e-06	0.7591	0.71811	2.3682	2	NaN	NaN	NaN	0	NaN	NaN	NaN	0	NaN	NaN
D3Z4B2;Q9CWZ7	D3Z4B2;Q9CWZ7	11;11	11;11	11;11	Gamma-soluble NSF attachment protein	Napg	>tr|D3Z4B2|D3Z4B2_MOUSE Gamma-soluble NSF attachment protein (Fragment) OS=Mus musculus GN=Napg PE=4 SV=1;>sp|Q9CWZ7|SNAG_MOUSE Gamma-soluble NSF attachment protein OS=Mus musculus GN=Napg PE=1 SV=1	2	11	11	11	7	0	10	2	7	0	10	2	7	0	10	2	34	34	34	39.366	353	353;312	11		17	3	31	2.0492e-240	1.0325	1.0311	52.607	29	0.68079	1.0907	83.634	11	NaN	NaN	NaN	0	1.0882	1.002
D3Z4C0;Q91VS8	D3Z4C0;Q91VS8	5;3	5;3	5;3	FERM, RhoGEF and pleckstrin domain-containing protein 2	Farp2	>tr|D3Z4C0|D3Z4C0_MOUSE FERM, RhoGEF and pleckstrin domain-containing protein 2 OS=Mus musculus GN=Farp2 PE=4 SV=1;>sp|Q91VS8|FARP2_MOUSE FERM, RhoGEF and pleckstrin domain-containing protein 2 OS=Mus musculus GN=Farp2 PE=1 SV=2	2	5	5	5	2	2	2	3	2	2	2	3	2	2	2	3	6.8	6.8	6.8	87.861	795	795;1065	5	4	4	6	19	1.8049e-12	NaN	NaN	NaN	0	NaN	NaN	NaN	0	NaN	NaN	NaN	0	NaN	NaN
Q3TCJ1;D3Z4D8	Q3TCJ1;D3Z4D8	3;3	3;3	3;3	BRISC complex subunit Abro1	Fam175b	>sp|Q3TCJ1|F175B_MOUSE BRISC complex subunit Abro1 OS=Mus musculus GN=Fam175b PE=2 SV=1;>tr|D3Z4D8|D3Z4D8_MOUSE BRISC complex subunit Abro1 OS=Mus musculus GN=Fam175b PE=4 SV=1	2	3	3	3	0	1	3	0	0	1	3	0	0	1	3	0	8.7	8.7	8.7	46.942	415	415;283		2	4		6	2.5325e-84	0.82219	0.78027	11.455	5	NaN	NaN	NaN	0	0.61155	0.88236	NaN	1	0.84239	0.76302
Q8BZS9-2;Q8BZS9;D3Z4E3	Q8BZS9-2;Q8BZS9;D3Z4E3	1;1;1	1;1;1	1;1;1	Putative pre-mRNA-splicing factor ATP-dependent RNA helicase DHX32	Dhx32	>sp|Q8BZS9-2|DHX32_MOUSE Isoform 2 of Putative pre-mRNA-splicing factor ATP-dependent RNA helicase DHX32 OS=Mus musculus GN=Dhx32;>sp|Q8BZS9|DHX32_MOUSE Putative pre-mRNA-splicing factor ATP-dependent RNA helicase DHX32 OS=Mus musculus GN=Dhx32 PE=2 SV=2;>	3	1	1	1	0	0	1	1	0	0	1	1	0	0	1	1	1.6	1.6	1.6	84.773	751	751;744;611			2	1	3	0.0006613	0.4564	0.42941	12.708	3	NaN	NaN	NaN	0	NaN	NaN	NaN	0	0.44973	0.42241
D3Z4L9;Q61333;G3UXC6;G3UWJ7;G3XA62	D3Z4L9;Q61333	4;4;1;1;1	4;4;1;1;1	4;4;1;1;1	Tumor necrosis factor alpha-induced protein 2	Tnfaip2	>tr|D3Z4L9|D3Z4L9_MOUSE Tumor necrosis factor alpha-induced protein 2 OS=Mus musculus GN=Tnfaip2 PE=4 SV=2;>sp|Q61333|TNAP2_MOUSE Tumor necrosis factor alpha-induced protein 2 OS=Mus musculus GN=Tnfaip2 PE=2 SV=2	5	4	4	4	0	0	4	3	0	0	4	3	0	0	4	3	6.8	6.8	6.8	79.933	708	708;691;151;128;115			10	4	14	2.9131e-15	1.6186	1.5375	12.378	10	NaN	NaN	NaN	0	NaN	NaN	NaN	0	1.6028	1.5695
D3Z4S3	D3Z4S3	5	5	5	Putative peptidyl-tRNA hydrolase PTRHD1	Ptrhd1	>sp|D3Z4S3|PTRD1_MOUSE Putative peptidyl-tRNA hydrolase PTRHD1 OS=Mus musculus GN=Ptrhd1 PE=3 SV=1	1	5	5	5	0	1	0	5	0	1	0	5	0	1	0	5	45.7	45.7	45.7	16.037	140	140		2		7	9	4.1589e-11	1.6692	1.5653	37.943	9	NaN	NaN	NaN	0	0.52211	0.71811	21.227	2	NaN	NaN
Q8BTY8;D3Z4T4;Q8BTY8-2;Q8BTY8-3;Q8BTY8-4	Q8BTY8;D3Z4T4;Q8BTY8-2;Q8BTY8-3	15;15;14;10;6	15;15;14;10;6	15;15;14;10;6	Sec1 family domain-containing protein 2	Scfd2	>sp|Q8BTY8|SCFD2_MOUSE Sec1 family domain-containing protein 2 OS=Mus musculus GN=Scfd2 PE=2 SV=1;>tr|D3Z4T4|D3Z4T4_MOUSE Sec1 family domain-containing protein 2 OS=Mus musculus GN=Scfd2 PE=4 SV=1;>sp|Q8BTY8-2|SCFD2_MOUSE Isoform 2 of Sec1 family domain-co	5	15	15	15	7	3	9	6	7	3	9	6	7	3	9	6	30.1	30.1	30.1	74.75	684	684;639;644;477;334	14	4	15	10	43	2.2418e-134	0.85449	0.84071	39.145	41	1.1588	1.5685	12.766	14	1.1069	1.4714	7.7693	4	0.76408	0.74237
D3Z4U0;D3Z4T9;Q9R020;E9PUD0;Q9R020-2	D3Z4U0;D3Z4T9;Q9R020;E9PUD0;Q9R020-2	15;14;14;12;12	15;14;14;12;12	15;14;14;12;12	Zinc finger Ran-binding domain-containing protein 2	Zranb2	>tr|D3Z4U0|D3Z4U0_MOUSE Zinc finger Ran-binding domain-containing protein 2 OS=Mus musculus GN=Zranb2 PE=4 SV=1;>tr|D3Z4T9|D3Z4T9_MOUSE Zinc finger Ran-binding domain-containing protein 2 OS=Mus musculus GN=Zranb2 PE=4 SV=1;>sp|Q9R020|ZRAB2_MOUSE Zinc fing	5	15	15	15	8	9	13	8	8	9	13	8	8	9	13	8	47	47	47	37.294	330	330;340;330;293;293	22	29	24	26	101	1.4584e-165	0.90696	0.99361	53.96	27	0.39141	0.5752	45.682	7	0.41285	0.54643	9.5847	7	1.5181	1.4131
D3Z4X1	D3Z4X1	9	1	1		Pgls	>tr|D3Z4X1|D3Z4X1_MOUSE 6-phosphogluconolactonase OS=Mus musculus GN=Pgls PE=4 SV=1	1	9	1	1	6	8	8	8	0	1	0	0	0	1	0	0	90.8	10.3	10.3	18.666	174	174		1			1	0	NaN	NaN	NaN	0	NaN	NaN	NaN	0	NaN	NaN	NaN	0	NaN	NaN
P56542;D3Z512	P56542;D3Z512	2;2	2;2	2;2	Deoxyribonuclease-2-alpha	Dnase2;Dnase2a	>sp|P56542|DNS2A_MOUSE Deoxyribonuclease-2-alpha OS=Mus musculus GN=Dnase2 PE=2 SV=1;>tr|D3Z512|D3Z512_MOUSE Protein Dnase2a OS=Mus musculus GN=Dnase2a PE=4 SV=1	2	2	2	2	2	1	1	2	2	1	1	2	2	1	1	2	9.3	9.3	9.3	38.81	353	353;332	2	4	4	3	13	6.5954e-08	0.97893	0.94158	39.024	13	0.6797	0.94887	33.67	2	0.43571	0.60643	45.115	4	1.1959	1.1227
Q9Z0X0;D3Z5F0	Q9Z0X0;D3Z5F0	1;1	1;1	1;1	Cdc42 effector protein 5	Cdc42ep5	>sp|Q9Z0X0|BORG3_MOUSE Cdc42 effector protein 5 OS=Mus musculus GN=Cdc42ep5 PE=1 SV=2;>tr|D3Z5F0|D3Z5F0_MOUSE Cdc42 effector protein 5 (Fragment) OS=Mus musculus GN=Cdc42ep5 PE=4 SV=1	2	1	1	1	0	1	0	0	0	1	0	0	0	1	0	0	8.7	8.7	8.7	15.545	150	150;79		6			6	0.00032248	NaN	NaN	NaN	0	NaN	NaN	NaN	0	NaN	NaN	NaN	0	NaN	NaN
D3Z5F7;P70345;P70345-2	D3Z5F7	12;2;2	12;2;2	2;2;2		Gm20521	>tr|D3Z5F7|D3Z5F7_MOUSE Protein Gm20521 OS=Mus musculus GN=Gm20521 PE=4 SV=1	3	12	12	2	2	2	9	5	2	2	9	5	0	0	2	0	37.8	37.8	8.4	37.244	333	333;193;178	17	25	25	13	80	9.089e-31	1.2275	1.3822	41.277	13	0.52525	0.56362	NaN	1	NaN	NaN	NaN	0	1.2972	1.4179
D3Z5I1;Q3UPF5;Q3UPF5-2;G3X9X5	D3Z5I1;Q3UPF5;Q3UPF5-2;G3X9X5	13;12;12;8	13;12;12;8	13;12;12;8	Zinc finger CCCH-type antiviral protein 1	Zc3hav1	>tr|D3Z5I1|D3Z5I1_MOUSE Zinc finger CCCH-type antiviral protein 1 OS=Mus musculus GN=Zc3hav1 PE=4 SV=1;>sp|Q3UPF5|ZCCHV_MOUSE Zinc finger CCCH-type antiviral protein 1 OS=Mus musculus GN=Zc3hav1 PE=1 SV=1;>sp|Q3UPF5-2|ZCCHV_MOUSE Isoform 2 of Zinc finger C	4	13	13	13	10	6	8	8	10	6	8	8	10	6	8	8	17.5	17.5	17.5	112.53	996	996;946;789;673	36	29	26	25	116	0	0.77171	0.9645	55.518	57	0.43354	0.6046	16.426	13	0.77021	0.9407	43.148	17	1.3636	1.3237
Q91W78;D3Z5I2	Q91W78;D3Z5I2	1;1	1;1	1;1	UPF0406 protein C16orf57 homolog	AA960436	>sp|Q91W78|USB1_MOUSE Putative U6 snRNA phosphodiesterase OS=Mus musculus GN=Usb1 PE=2 SV=1;>tr|D3Z5I2|D3Z5I2_MOUSE Protein AA960436 (Fragment) OS=Mus musculus GN=AA960436 PE=4 SV=1	2	1	1	1	0	1	0	1	0	1	0	1	0	1	0	1	4.9	4.9	4.9	30.25	267	267;113		1		1	2	2.7512e-06	0.87696	1.0422	37.246	2	NaN	NaN	NaN	0	0.53712	0.80089	NaN	1	NaN	NaN
Q9CXK9;D3Z5I9	Q9CXK9;D3Z5I9	7;7	7;7	7;7	RNA-binding protein 33	Rbm33	>sp|Q9CXK9|RBM33_MOUSE RNA-binding protein 33 OS=Mus musculus GN=Rbm33 PE=1 SV=2;>tr|D3Z5I9|D3Z5I9_MOUSE RNA-binding protein 33 OS=Mus musculus GN=Rbm33 PE=4 SV=1	2	7	7	7	3	5	4	6	3	5	4	6	3	5	4	6	5.8	5.8	5.8	137.32	1231	1231;1191	8	14	7	14	43	2.0563e-20	0.61565	0.57024	6.9672	2	NaN	NaN	NaN	0	NaN	NaN	NaN	0	0.62302	0.59904
D3Z5J3;E9QNA7;E9PYX6;E9Q6A3;Q62417-7;Q62417-2;Q62417-4;Q62417-6;Q62417-5	D3Z5J3;E9QNA7;E9PYX6;E9Q6A3;Q62417-7;Q62417-2;Q62417-4;Q62417-6;Q62417-5	6;5;5;5;4;4;4;4;4	6;5;5;5;4;4;4;4;4	2;2;1;2;1;1;1;1;1		Sorbs1	>tr|D3Z5J3|D3Z5J3_MOUSE Sorbin and SH3 domain-containing protein 1 OS=Mus musculus GN=Sorbs1 PE=4 SV=1;>tr|E9QNA7|E9QNA7_MOUSE Sorbin and SH3 domain-containing protein 1 OS=Mus musculus GN=Sorbs1 PE=4 SV=1;>tr|E9PYX6|E9PYX6_MOUSE Sorbin and SH3 domain-cont	9	6	6	2	3	5	3	2	3	5	3	2	1	1	0	0	8.2	8.2	3.2	103.98	938	938;740;724;714;836;740;714;695;684	16	10	7	4	37	1.0173e-85	NaN	NaN	NaN	0	NaN	NaN	NaN	0	NaN	NaN	NaN	0	NaN	NaN
Q9Z1T6;D3Z5N5;Q9Z1T6-1;Q9Z1T6-3	Q9Z1T6;D3Z5N5;Q9Z1T6-1	6;6;6;2	6;6;6;2	6;6;6;2	1-phosphatidylinositol 3-phosphate 5-kinase	Pikfyve	>sp|Q9Z1T6|FYV1_MOUSE 1-phosphatidylinositol 3-phosphate 5-kinase OS=Mus musculus GN=Pikfyve PE=1 SV=3;>tr|D3Z5N5|D3Z5N5_MOUSE 1-phosphatidylinositol 3-phosphate 5-kinase OS=Mus musculus GN=Pikfyve PE=4 SV=2;>sp|Q9Z1T6-1|FYV1_MOUSE Isoform 2 of 1-phosphati	4	6	6	6	1	1	6	2	1	1	6	2	1	1	6	2	3.7	3.7	3.7	236.87	2097	2097;2052;2052;497	10	5	11	7	33	2.1069e-17	1.3417	1.3407	9.1408	3	NaN	NaN	NaN	0	NaN	NaN	NaN	0	1.3417	1.3407
D3Z5N6;Q61103;F8WIP7	D3Z5N6;Q61103;F8WIP7	3;3;2	3;3;2	3;3;2	Zinc finger protein ubi-d4	Dpf2	>tr|D3Z5N6|D3Z5N6_MOUSE Zinc finger protein ubi-d4 OS=Mus musculus GN=Dpf2 PE=4 SV=1;>sp|Q61103|REQU_MOUSE Zinc finger protein ubi-d4 OS=Mus musculus GN=Dpf2 PE=1 SV=1;>tr|F8WIP7|F8WIP7_MOUSE Zinc finger protein ubi-d4 (Fragment) OS=Mus musculus GN=Dpf2 PE	3	3	3	3	2	1	2	1	2	1	2	1	2	1	2	1	9.9	9.9	9.9	45.854	405	405;391;214	5	4	3	4	16	2.6435e-99	1.0424	1.2318	9.0789	2	0.79987	1.1552	NaN	1	NaN	NaN	NaN	0	1.3585	1.3135
D3Z5N8;Q6KAU7-3;E9QKB6;G5E8T4;Q6KAU7;Q6KAU7-2	D3Z5N8;Q6KAU7-3;E9QKB6;G5E8T4;Q6KAU7;Q6KAU7-2	1;1;1;1;1;1	1;1;1;1;1;1	1;1;1;1;1;1	Pleckstrin homology domain-containing family G member 2	Plekhg2	>tr|D3Z5N8|D3Z5N8_MOUSE Pleckstrin homology domain-containing family G member 2 OS=Mus musculus GN=Plekhg2 PE=4 SV=1;>sp|Q6KAU7-3|PKHG2_MOUSE Isoform 3 of Pleckstrin homology domain-containing family G member 2 OS=Mus musculus GN=Plekhg2;>tr|E9QKB6|E9QKB6_	6	1	1	1	1	1	1	1	1	1	1	1	1	1	1	1	1.2	1.2	1.2	146.04	1365	1365;1365;1341;1340;1340;1298	31	15	23	30	99	4.1342e-15	NaN	NaN	NaN	0	NaN	NaN	NaN	0	NaN	NaN	NaN	0	NaN	NaN
E9QKQ3;Q9Z2Q2;K4DI66;H7BX94;Q9Z2Q2-2;F6ZLH4;Q9Z2Q2-3;D3Z5V3	E9QKQ3;Q9Z2Q2;K4DI66;H7BX94;Q9Z2Q2-2;F6ZLH4;Q9Z2Q2-3;D3Z5V3	2;2;2;2;2;2;2;2	2;2;2;2;2;2;2;2	2;2;2;2;2;2;2;2	Protein C16orf88 homolog	2310008H09Rik;Tsg118	>tr|E9QKQ3|E9QKQ3_MOUSE Protein 2310008H09Rik OS=Mus musculus GN=2310008H09Rik PE=4 SV=1;>sp|Q9Z2Q2|CP088_MOUSE Protein C16orf88 homolog OS=Mus musculus GN=Tsg118 PE=1 SV=2;>tr|K4DI66|K4DI66_MOUSE Protein 2310008H09Rik OS=Mus musculus GN=2310008H09Rik PE=4	8	2	2	2	1	2	1	1	1	2	1	1	1	2	1	1	6.6	6.6	6.6	59.679	532	532;478;370;347;318;317;295;192	5	6	4	3	18	7.3611e-244	NaN	NaN	NaN	0	NaN	NaN	NaN	0	NaN	NaN	NaN	0	NaN	NaN
O09012;D3Z600;O09012-2	O09012;D3Z600;O09012-2	13;13;13	13;13;13	13;13;13	Peroxisomal targeting signal 1 receptor	Pex5	>sp|O09012|PEX5_MOUSE Peroxisomal targeting signal 1 receptor OS=Mus musculus GN=Pex5 PE=2 SV=2;>tr|D3Z600|D3Z600_MOUSE Peroxisomal targeting signal 1 receptor OS=Mus musculus GN=Pex5 PE=4 SV=1;>sp|O09012-2|PEX5_MOUSE Isoform 2 of Peroxisomal targeting sig	3	13	13	13	5	1	10	5	5	1	10	5	5	1	10	5	31.5	31.5	31.5	70.755	639	639;632;602	9	1	16	6	32	4.1505e-109	1.1083	1.055	22.017	26	0.66751	0.85476	16.457	7	NaN	NaN	NaN	0	1.167	1.081
Q78FW7;Q60585;D3Z614	Q78FW7;Q60585;D3Z614	1;1;1	1;1;1	1;1;1	Zinc finger protein 30	Zfp30	>tr|Q78FW7|Q78FW7_MOUSE Brain specifically expressed BSG3 OS=Mus musculus GN=Zfp30 PE=2 SV=1;>sp|Q60585|ZFP30_MOUSE Zinc finger protein 30 OS=Mus musculus GN=Zfp30 PE=2 SV=2;>tr|D3Z614|D3Z614_MOUSE Zinc finger protein 30 OS=Mus musculus GN=Zfp30 PE=4 SV=1	3	1	1	1	1	1	1	1	1	1	1	1	1	1	1	1	1.8	1.8	1.8	64.362	548	548;533;467	4	4	2	3	13	0.00061197	NaN	NaN	NaN	0	NaN	NaN	NaN	0	NaN	NaN	NaN	0	NaN	NaN
Q9QZ88;D3Z645;Q9QZ88-2;D3YW98	Q9QZ88;D3Z645;Q9QZ88-2;D3YW98	13;13;12;7	13;13;12;7	4;4;3;1	Vacuolar protein sorting-associated protein 29	Vps29	>sp|Q9QZ88|VPS29_MOUSE Vacuolar protein sorting-associated protein 29 OS=Mus musculus GN=Vps29 PE=1 SV=1;>tr|D3Z645|D3Z645_MOUSE Vacuolar protein sorting-associated protein 29 OS=Mus musculus GN=Vps29 PE=4 SV=1;>sp|Q9QZ88-2|VPS29_MOUSE Isoform 2 of Vacuola	4	13	13	4	9	10	11	9	9	10	11	9	3	3	3	4	68.7	68.7	20.3	20.495	182	182;144;186;91	25	37	35	29	126	4.3304e-193	0.84986	0.88591	30.552	126	0.7928	1.2034	25.513	25	0.86304	1.2106	19.159	37	0.8398	0.79256
D3Z656;Q8CHC4;F7BQW7;E9Q7S0;D3Z1M7;F7CD11;F6VSS8;F6XIX0	D3Z656;Q8CHC4;F7BQW7;E9Q7S0	8;8;6;6;3;2;2;1	8;8;6;6;3;2;2;1	8;8;6;6;3;2;2;1	Synaptojanin-1	Synj1	>tr|D3Z656|D3Z656_MOUSE Synaptojanin-1 OS=Mus musculus GN=Synj1 PE=4 SV=1;>sp|Q8CHC4|SYNJ1_MOUSE Synaptojanin-1 OS=Mus musculus GN=Synj1 PE=1 SV=3;>tr|F7BQW7|F7BQW7_MOUSE Synaptojanin-1 (Fragment) OS=Mus musculus GN=Synj1 PE=4 SV=1;>tr|E9Q7S0|E9Q7S0_MOUSE	8	8	8	8	7	3	3	3	7	3	3	3	7	3	3	3	7.3	7.3	7.3	176.33	1607	1607;1574;1324;1309;693;189;119;103	26	11	12	18	67	1.0017e-89	0.50794	0.66104	68.524	8	0.50763	0.6266	50.428	5	0.25687	0.33936	NaN	1	1.3766	1.3535
Q9CWY4;D3Z684	Q9CWY4;D3Z684	2;2	2;2	2;2	Gem-associated protein 7	Gemin7	>sp|Q9CWY4|GEMI7_MOUSE Gem-associated protein 7 OS=Mus musculus GN=Gemin7 PE=2 SV=1;>tr|D3Z684|D3Z684_MOUSE Gem-associated protein 7 (Fragment) OS=Mus musculus GN=Gemin7 PE=4 SV=1	2	2	2	2	2	2	0	1	2	2	0	1	2	2	0	1	28.7	28.7	28.7	14.251	129	129;81	3	5		1	9	2.5417e-06	0.49442	0.76765	23.274	4	0.43009	0.68056	NaN	1	0.49442	0.76765	7.2356	2	NaN	NaN
D3Z6C3;P97351;D3Z7W7	D3Z6C3;P97351;D3Z7W7	32;32;28	32;32;28	32;32;28	40S ribosomal protein S3a	Gm10119;Rps3a;Gm9000	>tr|D3Z6C3|D3Z6C3_MOUSE Uncharacterized protein OS=Mus musculus GN=Gm10119 PE=3 SV=1;>sp|P97351|RS3A_MOUSE 40S ribosomal protein S3a OS=Mus musculus GN=Rps3a PE=1 SV=3;>tr|D3Z7W7|D3Z7W7_MOUSE Uncharacterized protein OS=Mus musculus GN=Gm9000 PE=3 SV=1	3	32	32	32	25	27	26	26	25	27	26	26	25	27	26	26	78.8	78.8	78.8	29.824	264	264;264;264	121	125	167	133	546	0	0.88772	0.99224	33.208	346	0.70661	1.0457	24.928	73	0.71516	1.0255	31.621	78	1.0235	0.9613
Q8BJ48;D3Z6C9	Q8BJ48;D3Z6C9	1;1	1;1	1;1	N-acetylglucosamine-1-phosphodiester alpha-N-acetylglucosaminidase	Nagpa	>sp|Q8BJ48|NAGPA_MOUSE N-acetylglucosamine-1-phosphodiester alpha-N-acetylglucosaminidase OS=Mus musculus GN=Nagpa PE=2 SV=2;>tr|D3Z6C9|D3Z6C9_MOUSE N-acetylglucosamine-1-phosphodiester alpha-N-acetylglucosaminidase OS=Mus musculus GN=Nagpa PE=4 SV=1	2	1	1	1	0	0	1	1	0	0	1	1	0	0	1	1	2.3	2.3	2.3	56.043	517	517;374			2	1	3	0.00031321	0.84927	0.82474	12.354	3	NaN	NaN	NaN	0	NaN	NaN	NaN	0	0.93294	0.91543
Q5EBH1;D3Z6G2	Q5EBH1;D3Z6G2	1;1	1;1	1;1	Ras association domain-containing protein 5	Rassf5	>sp|Q5EBH1|RASF5_MOUSE Ras association domain-containing protein 5 OS=Mus musculus GN=Rassf5 PE=1 SV=1;>tr|D3Z6G2|D3Z6G2_MOUSE Ras association domain-containing protein 5 OS=Mus musculus GN=Rassf5 PE=4 SV=1	2	1	1	1	1	1	1	1	1	1	1	1	1	1	1	1	3.9	3.9	3.9	46.713	413	413;321	10	4	2	7	23	7.36e-40	NaN	NaN	NaN	0	NaN	NaN	NaN	0	NaN	NaN	NaN	0	NaN	NaN
Q6PER3;D3Z6G3;D3YUY6	Q6PER3;D3Z6G3;D3YUY6	6;6;4	3;3;1	3;3;1	Microtubule-associated protein RP/EB family member 3	Mapre3	>sp|Q6PER3|MARE3_MOUSE Microtubule-associated protein RP/EB family member 3 OS=Mus musculus GN=Mapre3 PE=1 SV=1;>tr|D3Z6G3|D3Z6G3_MOUSE Microtubule-associated protein RP/EB family member 3 OS=Mus musculus GN=Mapre3 PE=4 SV=1;>tr|D3YUY6|D3YUY6_MOUSE Microtu	3	6	3	3	4	3	6	4	1	2	3	1	1	2	3	1	22.8	15.7	15.7	31.966	281	281;266;141	1	4	6	1	12	2.2338e-23	0.82631	0.86059	27.908	12	0.76111	1.0797	NaN	1	0.99596	1.2498	15.112	4	0.79674	0.74756
Q9WUB4;D3Z6H3;D3Z4E5;F6XWI6;D3Z6A1	Q9WUB4;D3Z6H3;D3Z4E5	5;5;4;1;1	5;5;4;1;1	5;5;4;1;1	Dynactin subunit 6	Dctn6	>sp|Q9WUB4|DCTN6_MOUSE Dynactin subunit 6 OS=Mus musculus GN=Dctn6 PE=1 SV=1;>tr|D3Z6H3|D3Z6H3_MOUSE Dynactin 6, isoform CRA_b OS=Mus musculus GN=Dctn6 PE=4 SV=1;>tr|D3Z4E5|D3Z4E5_MOUSE Dynactin subunit 6 OS=Mus musculus GN=Dctn6 PE=4 SV=1	5	5	5	5	3	2	4	2	3	2	4	2	3	2	4	2	27.4	27.4	27.4	20.67	190	190;185;195;163;103	5	4	14	3	26	4.1789e-16	0.88428	0.91566	22.745	25	0.89378	1.3253	3.4288	5	0.86945	1.0186	11.631	3	0.90244	0.8561
Q921W4;D3Z6I4;D3YZD6;Q921W4-2;F7BGV1	Q921W4;D3Z6I4;D3YZD6;Q921W4-2;F7BGV1	10;10;8;7;6	10;10;8;7;6	5;5;3;2;3	Quinone oxidoreductase-like protein 1	Cryzl1	>sp|Q921W4|QORL1_MOUSE Quinone oxidoreductase-like protein 1 OS=Mus musculus GN=Cryzl1 PE=2 SV=1;>tr|D3Z6I4|D3Z6I4_MOUSE Crystallin, zeta (Quinone reductase)-like 1, isoform CRA_h OS=Mus musculus GN=Cryzl1 PE=4 SV=1;>tr|D3YZD6|D3YZD6_MOUSE Quinone oxidored	5	10	10	5	8	4	7	3	8	4	7	3	4	1	4	1	37.1	37.1	17	38.725	348	348;333;300;231;220	15	5	12	7	39	2.9857e-73	0.53847	0.65039	66.709	36	0.38175	0.42031	19.522	15	0.44351	0.52901	16.362	4	1.5629	1.6929
Q6SKR2;D3Z6J0;E9PXT7;Q6PRU9	Q6SKR2;D3Z6J0;E9PXT7;Q6PRU9	4;4;2;2	4;4;2;2	4;4;2;2		N6amt1	>tr|Q6SKR2|Q6SKR2_MOUSE HemK methyltransferase family member 2, isoform CRA_c OS=Mus musculus GN=N6amt1 PE=2 SV=1;>tr|D3Z6J0|D3Z6J0_MOUSE HemK methyltransferase family member 2, isoform CRA_b OS=Mus musculus GN=N6amt1 PE=4 SV=1;>tr|E9PXT7|E9PXT7_MOUSE Prot	4	4	4	4	1	1	2	4	1	1	2	4	1	1	2	4	24.8	24.8	24.8	22.983	214	214;181;150;138	2	1	3	8	14	6.3621e-13	0.75037	0.73347	27.43	14	0.94012	1.4068	3.1999	2	0.78525	1.006	NaN	1	0.70526	0.68269
Q8BM55;D3Z6S1;Q8BM55-2;Q8BM55-3	Q8BM55;D3Z6S1	18;18;8;8	18;18;8;8	18;18;8;8	Transmembrane protein 214	Tmem214	>sp|Q8BM55|TM214_MOUSE Transmembrane protein 214 OS=Mus musculus GN=Tmem214 PE=2 SV=1;>tr|D3Z6S1|D3Z6S1_MOUSE Transmembrane protein 214 OS=Mus musculus GN=Tmem214 PE=4 SV=1	4	18	18	18	12	5	13	7	12	5	13	7	12	5	13	7	33.8	33.8	33.8	76.429	687	687;642;384;374	18	8	22	11	59	6.0536e-73	1.1021	1.1982	23.971	59	0.82189	1.1994	34.355	18	0.92337	1.2606	6.602	8	1.259	1.1932
Q91W40;D3Z710	Q91W40;D3Z710	4;4	3;3	3;3	Kinesin light chain 3	Klc3	>sp|Q91W40|KLC3_MOUSE Kinesin light chain 3 OS=Mus musculus GN=Klc3 PE=1 SV=1;>tr|D3Z710|D3Z710_MOUSE Kinesin light chain 3 OS=Mus musculus GN=Klc3 PE=4 SV=1	2	4	3	3	3	2	4	2	2	2	3	2	2	2	3	2	9.4	6.7	6.7	56.005	508	508;505	9	15	10	28	62	2.3392e-37	0.90337	0.92574	NaN	1	NaN	NaN	NaN	0	NaN	NaN	NaN	0	0.90337	0.92574
Q9DB90;Q9DB90-2;D3Z719	Q9DB90;Q9DB90-2;D3Z719	6;6;6	6;6;6	6;6;6	Protein SMG9	Smg9;1500002O20Rik	>sp|Q9DB90|SMG9_MOUSE Protein SMG9 OS=Mus musculus GN=Smg9 PE=2 SV=1;>sp|Q9DB90-2|SMG9_MOUSE Isoform 2 of Protein SMG9 OS=Mus musculus GN=Smg9;>tr|D3Z719|D3Z719_MOUSE Uncharacterized protein (Fragment) OS=Mus musculus GN=Smg9 PE=4 SV=1	3	6	6	6	5	3	6	3	5	3	6	3	5	3	6	3	17.3	17.3	17.3	57.62	520	520;234;210	10	11	19	19	59	1.1833e-30	0.63705	0.74672	NaN	1	NaN	NaN	NaN	0	NaN	NaN	NaN	0	0.63705	0.74672
P63139;D3Z723	P63139;D3Z723	2;2	2;2	2;2	Nuclear transcription factor Y subunit beta	Nfyb	>sp|P63139|NFYB_MOUSE Nuclear transcription factor Y subunit beta OS=Mus musculus GN=Nfyb PE=1 SV=1;>tr|D3Z723|D3Z723_MOUSE Nuclear transcription factor Y subunit beta (Fragment) OS=Mus musculus GN=Nfyb PE=4 SV=1	2	2	2	2	0	1	2	0	0	1	2	0	0	1	2	0	16.4	16.4	16.4	22.787	207	207;106		1	3		4	1.1798e-08	1.1879	1.0664	16.596	4	NaN	NaN	NaN	0	0.61922	0.90937	NaN	1	1.2903	1.1629
D3Z742	D3Z742	2	2	1		1600021P15Rik	>tr|D3Z742|D3Z742_MOUSE MCG125361, isoform CRA_a OS=Mus musculus GN=Mb21d2 PE=4 SV=1	1	2	2	1	0	1	0	1	0	1	0	1	0	1	0	0	6.1	6.1	1.4	55.656	491	491		1		2	3	2.1568e-11	1.3139	1.8601	NaN	1	NaN	NaN	NaN	0	1.3139	1.8601	NaN	1	NaN	NaN
D3Z780;Q61749-2;Q61749;F7CPG6	D3Z780;Q61749-2;Q61749	16;16;16;3	16;16;16;3	16;16;16;3	Translation initiation factor eIF-2B subunit delta	Eif2b4	>tr|D3Z780|D3Z780_MOUSE Translation initiation factor eIF-2B subunit delta OS=Mus musculus GN=Eif2b4 PE=4 SV=1;>sp|Q61749-2|EI2BD_MOUSE Isoform 2 of Translation initiation factor eIF-2B subunit delta OS=Mus musculus GN=Eif2b4;>sp|Q61749|EI2BD_MOUSE Transla	4	16	16	16	10	5	14	12	10	5	14	12	10	5	14	12	42.2	42.2	42.2	62.352	566	566;544;524;163	17	5	25	22	69	1.0563e-178	1.5681	1.4247	43.059	69	0.39355	0.58107	15.28	17	0.48581	0.67195	22.756	5	1.6667	1.5584
P31750;D3Z783;D3YXX3;D3YYP9	P31750;D3Z783;D3YXX3	14;14;9;6	14;14;9;6	11;11;8;5	RAC-alpha serine/threonine-protein kinase	Akt1	>sp|P31750|AKT1_MOUSE RAC-alpha serine/threonine-protein kinase OS=Mus musculus GN=Akt1 PE=1 SV=2;>tr|D3Z783|D3Z783_MOUSE RAC-alpha serine/threonine-protein kinase OS=Mus musculus GN=Akt1 PE=4 SV=2;>tr|D3YXX3|D3YXX3_MOUSE RAC-alpha serine/threonine-protein	4	14	14	11	5	6	11	2	5	6	11	2	4	5	8	2	32.5	32.5	26.7	55.707	480	480;437;202;134	7	10	16	5	38	1.4121e-64	1.4625	1.3503	35.897	33	0.53377	0.77698	11.365	7	0.62619	0.81827	24.915	6	1.7034	1.5151
Q80ZM7;D3Z793;D3Z7S8;Q05C74;D3Z7C2;D6RIQ7	Q80ZM7;D3Z793;D3Z7S8	3;3;3;1;1;1	3;3;3;1;1;1	3;3;3;1;1;1	Transcription initiation factor IIA subunit 2	Gtf2a2	>sp|Q80ZM7|T2AG_MOUSE Transcription initiation factor IIA subunit 2 OS=Mus musculus GN=Gtf2a2 PE=2 SV=2;>tr|D3Z793|D3Z793_MOUSE Transcription initiation factor IIA subunit 2 (Fragment) OS=Mus musculus GN=Gtf2a2 PE=3 SV=1;>tr|D3Z7S8|D3Z7S8_MOUSE Transcripti	6	3	3	3	0	2	0	3	0	2	0	3	0	2	0	3	29.4	29.4	29.4	12.473	109	109;91;87;76;68;62		7		5	12	6.0559e-10	0.85279	1.035	36.467	10	NaN	NaN	NaN	0	0.49238	0.66814	10.473	5	NaN	NaN
P61957;D3Z794;H7BWX9	P61957;D3Z794;H7BWX9	4;4;4	4;4;4	3;3;3	Small ubiquitin-related modifier 2	Sumo2	>sp|P61957|SUMO2_MOUSE Small ubiquitin-related modifier 2 OS=Mus musculus GN=Sumo2 PE=2 SV=1;>tr|D3Z794|D3Z794_MOUSE Small ubiquitin-related modifier 2 OS=Mus musculus GN=Sumo2 PE=4 SV=1;>tr|H7BWX9|H7BWX9_MOUSE Small ubiquitin-related modifier 2 OS=Mus mus	3	4	4	3	2	3	2	4	2	3	2	4	1	2	1	3	33.7	33.7	21.1	10.871	95	95;71;53	7	6	7	10	30	1.0754e-62	0.74004	1.0196	11.659	16	0.68988	1.0112	2.9304	4	0.67789	1.043	5.2483	4	1.0895	1.0442
Q80U62;Q80U62-2;Q80U62-3;D3Z7B1;Q80U62-4	Q80U62;Q80U62-2;Q80U62-3;D3Z7B1;Q80U62-4	2;2;2;2;2	2;2;2;2;2	2;2;2;2;2	Run domain Beclin-1 interacting and cystein-rich containing protein	Kiaa0226;1700021K19Rik	>sp|Q80U62|RUBIC_MOUSE Run domain Beclin-1 interacting and cystein-rich containing protein OS=Mus musculus GN=Kiaa0226 PE=1 SV=2;>sp|Q80U62-2|RUBIC_MOUSE Isoform 2 of Run domain Beclin-1 interacting and cystein-rich containing protein OS=Mus musculus GN=Ki	5	2	2	2	1	2	1	2	1	2	1	2	1	2	1	2	3.3	3.3	3.3	106.86	956	956;941;927;880;866	6	6	4	7	23	3.9073e-100	NaN	NaN	NaN	0	NaN	NaN	NaN	0	NaN	NaN	NaN	0	NaN	NaN
D3Z7B5;Q8BWY9;D6RGL3	D3Z7B5;Q8BWY9	25;25;3	25;25;3	25;25;3	Protein CIP2A	C330027C09Rik;Kiaa1524	>tr|D3Z7B5|D3Z7B5_MOUSE Protein C330027C09Rik OS=Mus musculus GN=C330027C09Rik PE=4 SV=1;>sp|Q8BWY9|CIP2A_MOUSE Protein CIP2A OS=Mus musculus GN=Kiaa1524 PE=2 SV=3	3	25	25	25	13	1	21	15	13	1	21	15	13	1	21	15	29.4	29.4	29.4	102.13	907	907;907;35	23	11	44	31	109	1.1959e-120	1.3802	1.3328	53.181	69	0.59674	0.8182	8.8161	16	NaN	NaN	NaN	0	1.4319	1.3884
D3Z7D3;F8WI56;Q8BWT5	D3Z7D3;F8WI56;Q8BWT5	4;4;3	1;1;0	1;1;0	Disco-interacting protein 2 homolog A	Dip2a	>tr|D3Z7D3|D3Z7D3_MOUSE Disco-interacting protein 2 homolog A OS=Mus musculus GN=Dip2a PE=4 SV=1;>tr|F8WI56|F8WI56_MOUSE Disco-interacting protein 2 homolog A OS=Mus musculus GN=Dip2a PE=4 SV=1;>sp|Q8BWT5|DIP2A_MOUSE Disco-interacting protein 2 homolog A O	3	4	1	1	1	2	3	3	0	1	1	1	0	1	1	1	3.8	1	1	170.58	1572	1572;1562;1523		3	2	2	7	1.8235e-11	NaN	NaN	NaN	0	NaN	NaN	NaN	0	NaN	NaN	NaN	0	NaN	NaN
Q9D9W0;D3Z7D4	Q9D9W0;D3Z7D4	2;2	2;2	2;2	Uncharacterized protein C21orf56 homolog	1700027D21Rik	>sp|Q9D9W0|SPC1L_MOUSE Speriolin-like protein OS=Mus musculus GN=Spatc1l PE=2 SV=1;>tr|D3Z7D4|D3Z7D4_MOUSE Protein 1700027D21Rik OS=Mus musculus GN=1700027D21Rik PE=4 SV=1	2	2	2	2	1	2	1	1	1	2	1	1	1	2	1	1	2.9	2.9	2.9	38.163	342	342;195	3	4	1	4	12	0.00013852	10.337	11.565	68.439	3	NaN	NaN	NaN	0	8.3907	9.676	25.226	2	30.771	30.389
D3Z7D5	D3Z7D5	24	2	2		Col6a2	>tr|D3Z7D5|D3Z7D5_MOUSE Collagen alpha-2(VI) chain OS=Mus musculus GN=Col6a2 PE=4 SV=1	1	24	2	2	18	20	22	17	1	1	2	0	1	1	2	0	33	2.5	2.5	98.987	933	933	2	1	3		6	0	0.70775	0.8261	79.237	6	1.1412	1.545	25.911	2	2.1119	2.5418	NaN	1	0.51385	0.52454
Q2NL51;D3Z7E5	Q2NL51;D3Z7E5	8;8	5;5	5;5	Glycogen synthase kinase-3 alpha	Gsk3a	>sp|Q2NL51|GSK3A_MOUSE Glycogen synthase kinase-3 alpha OS=Mus musculus GN=Gsk3a PE=1 SV=2;>tr|D3Z7E5|D3Z7E5_MOUSE Glycogen synthase kinase-3 alpha OS=Mus musculus GN=Gsk3a PE=4 SV=1	2	8	5	5	5	3	2	4	3	1	0	2	3	1	0	2	28.2	22.2	22.2	51.66	490	490;486	5	1		2	8	1.7415e-27	0.305	0.48617	23.918	4	0.30355	0.47049	28.957	3	0.30646	0.50237	NaN	1	NaN	NaN
D3Z7I0;Q3UU56;Q8BL74;D3Z2L1	D3Z7I0;Q3UU56;Q8BL74;D3Z2L1	2;2;2;1	2;2;2;1	2;2;2;1	General transcription factor 3C polypeptide 2	Gtf3c2	>tr|D3Z7I0|D3Z7I0_MOUSE General transcription factor 3C polypeptide 2 OS=Mus musculus GN=Gtf3c2 PE=4 SV=1;>tr|Q3UU56|Q3UU56_MOUSE General transcription factor 3C polypeptide 2 OS=Mus musculus GN=Gtf3c2 PE=2 SV=1;>sp|Q8BL74|TF3C2_MOUSE General transcription	4	2	2	2	1	1	1	2	1	1	1	2	1	1	1	2	2	2	2	104.72	950	950;907;907;228	9	4	10	8	31	2.0286e-06	NaN	NaN	NaN	0	NaN	NaN	NaN	0	NaN	NaN	NaN	0	NaN	NaN
D3Z7J6	D3Z7J6	7	1	1		Eif2b2	>tr|D3Z7J6|D3Z7J6_MOUSE Translation initiation factor eIF-2B subunit beta (Fragment) OS=Mus musculus GN=Eif2b2 PE=4 SV=1	1	7	1	1	1	1	7	2	0	0	1	0	0	0	1	0	39.9	3.9	3.9	25.369	228	228			1		1	2.0897e-86	1.1918	1.2301	NaN	1	NaN	NaN	NaN	0	NaN	NaN	NaN	0	1.1918	1.2301
O35381;D3Z7M9;D3YYE1;F6UFG6;Q64G17	O35381;D3Z7M9;D3YYE1;F6UFG6	16;16;14;12;4	16;16;14;12;4	13;13;11;9;2	Acidic leucine-rich nuclear phosphoprotein 32 family member A	Anp32a	>sp|O35381|AN32A_MOUSE Acidic leucine-rich nuclear phosphoprotein 32 family member A OS=Mus musculus GN=Anp32a PE=1 SV=1;>tr|D3Z7M9|D3Z7M9_MOUSE Acidic leucine-rich nuclear phosphoprotein 32 family member A OS=Mus musculus GN=Anp32a PE=4 SV=1;>tr|D3YYE1|D3	5	16	16	13	13	13	15	11	13	13	15	11	10	10	12	8	50.6	50.6	44.1	28.537	247	247;233;198;138;123	41	36	41	30	148	0	0.83571	0.98423	48.346	132	0.4367	0.60009	21.963	35	0.4485	0.61733	29.709	33	1.598	1.5265
D3Z7P0;Q8K3W0;Q8K3W0-1;E9Q0U3;Q8K3W0-5;Q8K3W0-6;Q8K3W0-4;E9Q8Q1	D3Z7P0;Q8K3W0;Q8K3W0-1;E9Q0U3;Q8K3W0-5	8;8;6;5;4;3;3;3	8;8;6;5;4;3;3;3	8;8;6;5;4;3;3;3	BRCA1-A complex subunit BRE	Bre	>tr|D3Z7P0|D3Z7P0_MOUSE BRCA1-A complex subunit BRE OS=Mus musculus GN=Bre PE=4 SV=1;>sp|Q8K3W0|BRE_MOUSE BRCA1-A complex subunit BRE OS=Mus musculus GN=Bre PE=1 SV=2;>sp|Q8K3W0-1|BRE_MOUSE Isoform 1 of BRCA1-A complex subunit BRE OS=Mus musculus GN=Bre;>t	8	8	8	8	3	4	6	3	3	4	6	3	3	4	6	3	30.6	30.6	30.6	43.749	385	385;383;420;205;374;319;245;43	13	6	10	6	35	5.5398e-47	0.94574	0.93729	20.303	23	0.58501	0.71854	15.004	5	0.6335	0.85774	8.8313	4	0.9672	0.96594
D3Z7P3;D3Z7P4;F7B327	D3Z7P3;D3Z7P4	28;20;5	4;4;4	4;4;4	Glutaminase kidney isoform, mitochondrial	Gls	>sp|D3Z7P3|GLSK_MOUSE Glutaminase kidney isoform, mitochondrial OS=Mus musculus GN=Gls PE=1 SV=1;>tr|D3Z7P4|D3Z7P4_MOUSE Glutaminase kidney isoform, mitochondrial OS=Mus musculus GN=Gls PE=3 SV=1	3	28	4	4	16	13	22	19	2	1	2	2	2	1	2	2	55.2	9.1	9.1	73.963	674	674;491;205	5	4	5	4	18	0	0.85266	0.93879	40.062	18	0.97357	1.3707	8.0051	5	0.92937	1.2165	7.3616	4	0.57945	0.55995
D3Z7P3-2;F6RDM4	D3Z7P3-2	28;3	28;3	2;2			>sp|D3Z7P3-2|GLSK_MOUSE Isoform 2 of Glutaminase kidney isoform, mitochondrial OS=Mus musculus GN=Gls	2	28	28	2	18	13	24	20	18	13	24	20	2	0	2	2	59.2	59.2	3.8	65.994	603	603;123	75	50	99	75	299	0	0.90045	0.90296	27.883	297	0.72828	0.96332	33.819	75	0.91913	1.1806	22.706	49	0.88443	0.81785
D3Z7P5	D3Z7P5	8	1	1		Gls	>tr|D3Z7P5|D3Z7P5_MOUSE Glutaminase kidney isoform, mitochondrial OS=Mus musculus GN=Gls PE=4 SV=1	1	8	1	1	7	4	7	6	0	0	0	1	0	0	0	1	38	5.5	5.5	30.364	274	274				1	1	6.6302e-117	NaN	NaN	NaN	0	NaN	NaN	NaN	0	NaN	NaN	NaN	0	NaN	NaN
D3Z7Q5	D3Z7Q5	6	1	1		Pdcd5	>tr|D3Z7Q5|D3Z7Q5_MOUSE Programmed cell death protein 5 OS=Mus musculus GN=Pdcd5 PE=4 SV=1	1	6	1	1	3	5	1	5	1	0	0	0	1	0	0	0	37.6	8.8	8.8	21.985	205	205	1				1	6.9772e-226	1.7753	2.2555	NaN	1	1.7753	2.2555	NaN	1	NaN	NaN	NaN	0	NaN	NaN
D4QGC2;E9Q6E8	D4QGC2;E9Q6E8	1;1	1;1	1;1		Maml3	>tr|D4QGC2|D4QGC2_MOUSE Mastermind-2 OS=Mus musculus GN=Maml3 PE=2 SV=1;>tr|E9Q6E8|E9Q6E8_MOUSE Protein Maml3 OS=Mus musculus GN=Maml3 PE=4 SV=1	2	1	1	1	0	1	0	0	0	1	0	0	0	1	0	0	1.4	1.4	1.4	121.66	1135	1135;489		1			1	0.0071127	0.86807	1.0889	NaN	1	NaN	NaN	NaN	0	0.86807	1.0889	NaN	1	NaN	NaN
Q9CQ89;D5MCW4;Q9CQ89-3	Q9CQ89;D5MCW4;Q9CQ89-3	2;2;1	2;2;1	2;2;1	Protein CutA	Cuta	>sp|Q9CQ89|CUTA_MOUSE Protein CutA OS=Mus musculus GN=Cuta PE=2 SV=3;>tr|D5MCW4|D5MCW4_MOUSE Protein CutA OS=Mus musculus GN=Cuta PE=2 SV=1;>sp|Q9CQ89-3|CUTA_MOUSE Isoform 2 of Protein CutA OS=Mus musculus GN=Cuta	3	2	2	2	1	2	1	2	1	2	1	2	1	2	1	2	18.1	18.1	18.1	18.865	177	177;154;136	2	4	2	4	12	1.0923e-26	0.86413	1.024	6.9788	12	0.67986	1.014	4.4504	2	0.65463	0.97433	4.6498	4	1.089	1.0253
Q8VDW4;D6RCG4	Q8VDW4;D6RCG4	1;1	1;1	1;1	Ubiquitin-conjugating enzyme E2 W	Ube2w	>sp|Q8VDW4|UBE2W_MOUSE Ubiquitin-conjugating enzyme E2 W OS=Mus musculus GN=Ube2w PE=1 SV=1;>tr|D6RCG4|D6RCG4_MOUSE Ubiquitin-conjugating enzyme E2 W OS=Mus musculus GN=Ube2w PE=4 SV=1	2	1	1	1	0	0	1	0	0	0	1	0	0	0	1	0	11.9	11.9	11.9	17.345	151	151;76			2		2	2.6613e-05	1.7605	1.7539	21.455	2	NaN	NaN	NaN	0	NaN	NaN	NaN	0	1.7605	1.7539
O35216;D6RCV6;D6RJ71	O35216;D6RCV6;D6RJ71	2;2;2	2;2;2	2;2;2	Histone H3-like centromeric protein A	Cenpa	>sp|O35216|CENPA_MOUSE Histone H3-like centromeric protein A OS=Mus musculus GN=Cenpa PE=2 SV=1;>tr|D6RCV6|D6RCV6_MOUSE Centromere protein A, isoform CRA_c OS=Mus musculus GN=Cenpa PE=4 SV=1;>tr|D6RJ71|D6RJ71_MOUSE Centromere protein A, isoform CRA_a OS=Mu	3	2	2	2	2	1	2	2	2	1	2	2	2	1	2	2	8.2	8.2	8.2	15.509	134	134;42;39	9	6	3	7	25	2.2174e-06	NaN	NaN	NaN	0	NaN	NaN	NaN	0	NaN	NaN	NaN	0	NaN	NaN
Q80TA1;Q8CET7;D6RE20	Q80TA1;Q8CET7;D6RE20	3;3;3	3;3;3	3;3;3	Ethanolaminephosphotransferase 1	Ept1	>sp|Q80TA1|EPT1_MOUSE Ethanolaminephosphotransferase 1 OS=Mus musculus GN=Ept1 PE=2 SV=3;>tr|Q8CET7|Q8CET7_MOUSE DNA segment, Chr 5, Wayne State University 178, expressed, isoform CRA_c OS=Mus musculus GN=Ept1 PE=2 SV=1;>tr|D6RE20|D6RE20_MOUSE DNA segment,	3	3	3	3	2	0	3	0	2	0	3	0	2	0	3	0	10.3	10.3	10.3	45.363	398	398;198;66	2		7		9	9.4204e-12	0.89314	0.80891	26.892	9	0.8738	1.4009	0.47777	2	NaN	NaN	NaN	0	0.92891	0.80732
Q3U466;D6RE34	Q3U466;D6RE34	1;1	1;1	1;1		Cln6	>tr|Q3U466|Q3U466_MOUSE Protein Cln6 OS=Mus musculus GN=Cln6 PE=2 SV=1;>tr|D6RE34|D6RE34_MOUSE Protein Cln6 OS=Mus musculus GN=Cln6 PE=4 SV=1	2	1	1	1	0	0	1	0	0	0	1	0	0	0	1	0	5.5	5.5	5.5	35.859	308	308;40			2		2	9.5719e-05	0.92864	0.90089	4.0251	2	NaN	NaN	NaN	0	NaN	NaN	NaN	0	0.92864	0.90089
Q8BX51;D6RFA5	Q8BX51;D6RFA5	1;1	1;1	1;1	Zeta-sarcoglycan	Sgcz	>sp|Q8BX51|SGCZ_MOUSE Zeta-sarcoglycan OS=Mus musculus GN=Sgcz PE=2 SV=1;>tr|D6RFA5|D6RFA5_MOUSE Zeta-sarcoglycan OS=Mus musculus GN=Sgcz PE=4 SV=1	2	1	1	1	1	0	1	1	1	0	1	1	1	0	1	1	3.9	3.9	3.9	34.461	311	311;209	2		1	4	7	0.0012272	NaN	NaN	NaN	0	NaN	NaN	NaN	0	NaN	NaN	NaN	0	NaN	NaN
Q9D8V7;D6RFV4;D3Z5H3	Q9D8V7;D6RFV4;D3Z5H3	2;2;1	2;2;1	2;2;1	Signal peptidase complex catalytic subunit SEC11C	Sec11c	>sp|Q9D8V7|SC11C_MOUSE Signal peptidase complex catalytic subunit SEC11C OS=Mus musculus GN=Sec11c PE=2 SV=3;>tr|D6RFV4|D6RFV4_MOUSE Sec11-like 3 (S. cerevisiae), isoform CRA_c OS=Mus musculus GN=Sec11c PE=4 SV=1;>tr|D3Z5H3|D3Z5H3_MOUSE Signal peptidase co	3	2	2	2	1	1	1	1	1	1	1	1	1	1	1	1	7.8	7.8	7.8	21.66	192	192;99;101	2	1	2	1	6	6.3132e-07	1.2363	1.4823	104.04	6	2.5335	3.765	4.6092	2	2.0565	2.9803	NaN	1	0.48589	0.46053
Q80XP8;D6RG49	Q80XP8;D6RG49	2;2	2;2	2;2	Protein FAM76B	Fam76b	>sp|Q80XP8|FA76B_MOUSE Protein FAM76B OS=Mus musculus GN=Fam76b PE=2 SV=1;>tr|D6RG49|D6RG49_MOUSE Protein FAM76B OS=Mus musculus GN=Fam76b PE=4 SV=1	2	2	2	2	1	1	1	2	1	1	1	2	1	1	1	2	7.4	7.4	7.4	38.555	339	339;233	5	6	4	7	22	6.052e-92	1.028	1.0201	32.906	3	NaN	NaN	NaN	0	NaN	NaN	NaN	0	NaN	NaN
E9PW44;E9Q5K9;E9Q7Z8;D6RG95	E9PW44;E9Q5K9;E9Q7Z8;D6RG95	3;3;3;3	3;3;3;3	3;3;3;3		Ythdc1	>tr|E9PW44|E9PW44_MOUSE Protein Ythdc1 OS=Mus musculus GN=Ythdc1 PE=4 SV=1;>tr|E9Q5K9|E9Q5K9_MOUSE Protein Ythdc1 OS=Mus musculus GN=Ythdc1 PE=4 SV=1;>tr|E9Q7Z8|E9Q7Z8_MOUSE Protein Ythdc1 OS=Mus musculus GN=Ythdc1 PE=4 SV=1;>tr|D6RG95|D6RG95_MOUSE Protein	4	3	3	3	2	3	1	2	2	3	1	2	2	3	1	2	5.3	5.3	5.3	85.648	736	736;728;710;545	27	23	20	22	92	9.1716e-17	1.7854	2.6718	2.5454	2	1.685	2.6241	NaN	1	1.8917	2.7203	NaN	1	NaN	NaN
D6RGQ8	D6RGQ8	3	1	1		Arhgef11	>tr|D6RGQ8|D6RGQ8_MOUSE Protein Arhgef11 OS=Mus musculus GN=Arhgef11 PE=4 SV=1	1	3	1	1	0	1	0	2	0	1	0	0	0	1	0	0	8.1	1.2	1.2	67.455	608	608		1			1	3.1712e-46	1.5732	2.0681	NaN	1	NaN	NaN	NaN	0	1.5732	2.0681	NaN	1	NaN	NaN
Q8C4C9;Q9QYI4;D6RHR9	Q8C4C9;Q9QYI4;D6RHR9	5;5;5	5;5;5	5;5;5	DnaJ homolog subfamily B member 12	Dnajb12	>tr|Q8C4C9|Q8C4C9_MOUSE DnaJ (Hsp40) homolog, subfamily B, member 12, isoform CRA_d OS=Mus musculus GN=Dnajb12 PE=2 SV=1;>sp|Q9QYI4|DJB12_MOUSE DnaJ homolog subfamily B member 12 OS=Mus musculus GN=Dnajb12 PE=2 SV=2;>tr|D6RHR9|D6RHR9_MOUSE DnaJ homolog sub	3	5	5	5	2	1	5	1	2	1	5	1	2	1	5	1	13.5	13.5	13.5	42.432	378	378;376;126	4	1	10	1	16	2.7395e-104	0.9604	1.1036	16.193	14	0.95366	1.3357	10.16	4	0.96211	1.1975	NaN	1	0.95391	0.9629
Q6P5E8;D6RI30	Q6P5E8;D6RI30	1;1	1;1	1;1	Diacylglycerol kinase theta	Dgkq	>sp|Q6P5E8|DGKQ_MOUSE Diacylglycerol kinase theta OS=Mus musculus GN=Dgkq PE=1 SV=1;>tr|D6RI30|D6RI30_MOUSE Diacylglycerol kinase theta OS=Mus musculus GN=Dgkq PE=4 SV=1	2	1	1	1	1	1	1	1	1	1	1	1	1	1	1	1	1.6	1.6	1.6	102.25	934	934;257	2	6	9	10	27	6.4736e-15	NaN	NaN	NaN	0	NaN	NaN	NaN	0	NaN	NaN	NaN	0	NaN	NaN
E9PUE2;Q9QZL6;D6RJJ7;G3UWN7	E9PUE2;Q9QZL6;D6RJJ7;G3UWN7	2;2;2;1	2;2;2;1	2;2;2;1	Ubiquitin carboxyl-terminal hydrolase;Ubiquitin carboxyl-terminal hydrolase 21	Usp21	>tr|E9PUE2|E9PUE2_MOUSE Ubiquitin carboxyl-terminal hydrolase OS=Mus musculus GN=Usp21 PE=3 SV=1;>sp|Q9QZL6|UBP21_MOUSE Ubiquitin carboxyl-terminal hydrolase 21 OS=Mus musculus GN=Usp21 PE=1 SV=1;>tr|D6RJJ7|D6RJJ7_MOUSE Ubiquitin carboxyl-terminal hydrolas	4	2	2	2	0	1	1	0	0	1	1	0	0	1	1	0	5.1	5.1	5.1	62.619	566	566;566;451;162		2	1		3	6.963e-05	0.66518	0.84035	NaN	1	NaN	NaN	NaN	0	NaN	NaN	NaN	0	0.66518	0.84035
E0CX20;Q6PGH1	E0CX20;Q6PGH1	10;7	10;7	10;7	Protein BUD31 homolog	Bud31	>tr|E0CX20|E0CX20_MOUSE Protein BUD31 homolog OS=Mus musculus GN=Bud31 PE=4 SV=1;>sp|Q6PGH1|BUD31_MOUSE Protein BUD31 homolog OS=Mus musculus GN=Bud31 PE=2 SV=1	2	10	10	10	7	7	10	8	7	7	10	8	7	7	10	8	58.3	58.3	58.3	17	144	144;103	14	19	34	30	97	1.8834e-56	1.4265	1.3451	42.859	96	0.4462	0.65938	5.4476	14	0.4476	0.62964	19.258	19	1.6377	1.5458
Q923B0;E0CX39;E0CZ04;Q923B0-2;H3BKQ5	Q923B0;E0CX39;E0CZ04;Q923B0-2	6;6;6;4;1	6;6;6;4;1	6;6;6;4;1	Gamma-glutamylaminecyclotransferase	A2ld1	>sp|Q923B0|GGACT_MOUSE Gamma-glutamylaminecyclotransferase OS=Mus musculus GN=Ggact PE=1 SV=1;>tr|E0CX39|E0CX39_MOUSE Gamma-glutamylaminecyclotransferase (Fragment) OS=Mus musculus GN=A2ld1 PE=4 SV=1;>tr|E0CZ04|E0CZ04_MOUSE Gamma-glutamylaminecyclotransfer	5	6	6	6	0	1	6	2	0	1	6	2	0	1	6	2	54.4	54.4	54.4	17.08	149	149;122;105;79;37		2	17	3	22	8.289e-27	0.88441	0.84406	10.015	22	NaN	NaN	NaN	0	0.77977	1.1097	0.36364	2	0.88036	0.84204
Q8BYJ6;E0CX53;E9Q6Q8;H7BX82;Q8BYJ6-3;Q8BYJ6-2;Q8BYJ6-4;F6SUV7	Q8BYJ6;E0CX53;E9Q6Q8;H7BX82;Q8BYJ6-3;Q8BYJ6-2;Q8BYJ6-4;F6SUV7	3;3;3;3;3;3;3;2	3;3;3;3;3;3;3;2	3;3;3;3;3;3;3;2	TBC1 domain family member 4	Tbc1d4	>sp|Q8BYJ6|TBCD4_MOUSE TBC1 domain family member 4 OS=Mus musculus GN=Tbc1d4 PE=1 SV=2;>tr|E0CX53|E0CX53_MOUSE TBC1 domain family member 4 OS=Mus musculus GN=Tbc1d4 PE=4 SV=1;>tr|E9Q6Q8|E9Q6Q8_MOUSE TBC1 domain family member 4 OS=Mus musculus GN=Tbc1d4 PE=	8	3	3	3	1	2	0	3	1	2	0	3	1	2	0	3	2.5	2.5	2.5	147.45	1307	1307;1306;1243;839;818;810;809;957	1	7		12	20	4.8539e-10	0.38684	0.38654	NaN	1	NaN	NaN	NaN	0	NaN	NaN	NaN	0	NaN	NaN
Q80Z96;Q3UXU7;F8WI52;E0CX72	Q80Z96;Q3UXU7;F8WI52;E0CX72	1;1;1;1	1;1;1;1	1;1;1;1	Vang-like protein 1	Vangl1	>sp|Q80Z96|VANG1_MOUSE Vang-like protein 1 OS=Mus musculus GN=Vangl1 PE=1 SV=2;>tr|Q3UXU7|Q3UXU7_MOUSE Vang-like protein 1 OS=Mus musculus GN=Vangl1 PE=2 SV=1;>tr|F8WI52|F8WI52_MOUSE Vang-like protein 1 OS=Mus musculus GN=Vangl1 PE=4 SV=1;>tr|E0CX72|E0CX72	4	1	1	1	1	0	1	0	1	0	1	0	1	0	1	0	3.6	3.6	3.6	60.063	526	526;476;393;137	1		2		3	0.0006602	NaN	NaN	NaN	0	NaN	NaN	NaN	0	NaN	NaN	NaN	0	NaN	NaN
Q8BS45;E0CYE0;E0CX73;E0CXQ7	Q8BS45;E0CYE0;E0CX73;E0CXQ7	1;1;1;1	1;1;1;1	1;1;1;1	Tetratricopeptide repeat protein 26	Ttc26	>sp|Q8BS45|TTC26_MOUSE Tetratricopeptide repeat protein 26 OS=Mus musculus GN=Ttc26 PE=2 SV=1;>tr|E0CYE0|E0CYE0_MOUSE Tetratricopeptide repeat protein 26 (Fragment) OS=Mus musculus GN=Ttc26 PE=4 SV=1;>tr|E0CX73|E0CX73_MOUSE Tetratricopeptide repeat protein	4	1	1	1	0	1	0	1	0	1	0	1	0	1	0	1	2.7	2.7	2.7	64.15	554	554;210;203;101		1		2	3	0.00099071	NaN	NaN	NaN	0	NaN	NaN	NaN	0	NaN	NaN	NaN	0	NaN	NaN
Q8R3P9;E0CX75;Q8R3P9-2	Q8R3P9;E0CX75;Q8R3P9-2	1;1;1	1;1;1	1;1;1	Ankyrin repeat domain-containing protein 32	Ankrd32	>sp|Q8R3P9|ANR32_MOUSE Ankyrin repeat domain-containing protein 32 OS=Mus musculus GN=Ankrd32 PE=2 SV=3;>tr|E0CX75|E0CX75_MOUSE Ankyrin repeat domain-containing protein 32 (Fragment) OS=Mus musculus GN=Ankrd32 PE=4 SV=1;>sp|Q8R3P9-2|ANR32_MOUSE Isoform 2 o	3	1	1	1	1	1	1	1	1	1	1	1	1	1	1	1	1.4	1.4	1.4	121	1054	1054;289;250	3	2	11	5	21	0.00014264	NaN	NaN	NaN	0	NaN	NaN	NaN	0	NaN	NaN	NaN	0	NaN	NaN
E0CX95	E0CX95	1	1	1		Zmiz1	>tr|E0CX95|E0CX95_MOUSE Zinc finger MIZ domain-containing protein 1 (Fragment) OS=Mus musculus GN=Zmiz1 PE=4 SV=1	1	1	1	1	1	0	1	0	1	0	1	0	1	0	1	0	7.8	7.8	7.8	15.893	154	154	2		9		11	0.0010782	NaN	NaN	NaN	0	NaN	NaN	NaN	0	NaN	NaN	NaN	0	NaN	NaN
Q9D2C7;E0CX98;E0CXR0;E0CZE8	Q9D2C7;E0CX98;E0CXR0;E0CZE8	2;2;2;2	2;2;2;2	2;2;2;2	Bax inhibitor 1	Tmbim6	>sp|Q9D2C7|BI1_MOUSE Bax inhibitor 1 OS=Mus musculus GN=Tmbim6 PE=2 SV=1;>tr|E0CX98|E0CX98_MOUSE Bax inhibitor 1 (Fragment) OS=Mus musculus GN=Tmbim6 PE=3 SV=1;>tr|E0CXR0|E0CXR0_MOUSE Bax inhibitor 1 (Fragment) OS=Mus musculus GN=Tmbim6 PE=3 SV=1;>tr|E0CZE	4	2	2	2	2	2	2	2	2	2	2	2	2	2	2	2	3.8	3.8	3.8	26.477	237	237;235;204;32	7	6	8	9	30	4.3405e-06	0.81964	0.77443	78.768	30	1.9544	2.7409	13.472	7	1.7439	1.9959	25.624	6	0.44992	0.42635
E0CXB9;Q61301;Q61301-3;Q61301-2;Q8BS72	E0CXB9;Q61301;Q61301-3;Q61301-2	11;11;11;11;5	2;2;2;2;1	2;2;2;2;1	Catenin alpha-2	Ctnna2	>tr|E0CXB9|E0CXB9_MOUSE Catenin alpha-2 OS=Mus musculus GN=Ctnna2 PE=4 SV=1;>sp|Q61301|CTNA2_MOUSE Catenin alpha-2 OS=Mus musculus GN=Ctnna2 PE=1 SV=3;>sp|Q61301-3|CTNA2_MOUSE Isoform 3 of Catenin alpha-2 OS=Mus musculus GN=Ctnna2;>sp|Q61301-2|CTNA2_MOUSE	5	11	2	2	9	8	8	10	1	1	1	2	1	1	1	2	12.6	2.6	2.6	106.73	966	966;953;918;905;356	6	2	8	7	23	0	0.97241	1.136	12.715	23	0.92347	1.2408	7.6584	6	0.95484	1.2779	6.13	2	1.1044	1.0518
E0CXC2;Q8VC56;G3UZ59;G3UWU4	E0CXC2	8;2;2;1	2;2;0;1	2;2;0;1		Rnf8	>tr|E0CXC2|E0CXC2_MOUSE E3 ubiquitin-protein ligase RNF8 OS=Mus musculus GN=Rnf8 PE=4 SV=1	4	8	2	2	5	3	6	4	1	0	1	0	1	0	1	0	12.1	4.3	4.3	81.37	719	719;488;68;212	1		1		2	1.4575e-43	1.4026	1.2447	29.294	2	1.2463	1.0118	NaN	1	NaN	NaN	NaN	0	1.5785	1.5312
E0CXJ3	E0CXJ3	10	1	1		Eif2s2	>tr|E0CXJ3|E0CXJ3_MOUSE Eukaryotic translation initiation factor 2 subunit 2 (Fragment) OS=Mus musculus GN=Eif2s2 PE=4 SV=1	1	10	1	1	10	7	9	5	1	1	0	1	1	1	0	1	71.2	6.8	6.8	13.625	118	118	7	3		8	18	1.7466e-223	0.63178	0.84657	32.415	18	0.48907	0.67453	13.779	7	0.52258	0.66003	10.204	3	NaN	NaN
Q9CQ73;E0CXK9;E0CX59	Q9CQ73;E0CXK9;E0CX59	7;7;6	7;7;6	7;7;6		Pkp2	>tr|Q9CQ73|Q9CQ73_MOUSE Plakophilin 2 OS=Mus musculus GN=Pkp2 PE=2 SV=1;>tr|E0CXK9|E0CXK9_MOUSE Protein Pkp2 OS=Mus musculus GN=Pkp2 PE=4 SV=1;>tr|E0CX59|E0CX59_MOUSE Protein Pkp2 OS=Mus musculus GN=Pkp2 PE=4 SV=1	3	7	7	7	2	3	5	5	2	3	5	5	2	3	5	5	10.9	10.9	10.9	88.103	795	795;477;303	4	8	6	11	29	2.0699e-15	1.3851	1.3529	34.025	2	NaN	NaN	NaN	0	NaN	NaN	NaN	0	1.3851	1.3529
E9Q4S1;E9Q8J6;E9Q7S6;E9PYP0;E9PX38;E9PXX4;E9PUL4;E0CXQ1	E9Q4S1;E9Q8J6;E9Q7S6;E9PYP0;E9PX38;E9PXX4;E9PUL4;E0CXQ1	1;1;1;1;1;1;1;1	1;1;1;1;1;1;1;1	1;1;1;1;1;1;1;1	High affinity cAMP-specific and IBMX-insensitive 3,5-cyclic phosphodiesterase 8B	Pde8b	>sp|E9Q4S1|PDE8B_MOUSE High affinity cAMP-specific and IBMX-insensitive 3,5-cyclic phosphodiesterase 8B OS=Mus musculus GN=Pde8b PE=2 SV=1;>tr|E9Q8J6|E9Q8J6_MOUSE High affinity cAMP-specific and IBMX-insensitive 3,5-cyclic phosphodiesterase 8B OS=Mus m	8	1	1	1	1	1	0	1	1	1	0	1	1	1	0	1	1.3	1.3	1.3	96.738	865	865;838;830;788;780;730;674;329	2	3		2	7	7.6674e-05	NaN	NaN	NaN	0	NaN	NaN	NaN	0	NaN	NaN	NaN	0	NaN	NaN
Q08122-4;Q08122;Q08122-1;Q08122-2;E0CXS9;F8WIE2;E0CY14;E0CXS2;J3KMT7;E0CXU1;Q3TY99;F6TS96;E0CY76;E0CYM5	Q08122-4;Q08122;Q08122-1;Q08122-2;E0CXS9;F8WIE2;E0CY14;E0CXS2;J3KMT7;E0CXU1;Q3TY99;F6TS96;E0CY76	7;7;7;7;7;7;7;7;6;6;6;6;5;3	7;7;7;7;7;7;7;7;6;6;6;6;5;3	7;7;7;7;7;7;7;7;6;6;6;6;5;3	Transducin-like enhancer protein 3	Tle3	>sp|Q08122-4|TLE3_MOUSE Isoform 4 of Transducin-like enhancer protein 3 OS=Mus musculus GN=Tle3;>sp|Q08122|TLE3_MOUSE Transducin-like enhancer protein 3 OS=Mus musculus GN=Tle3 PE=1 SV=3;>sp|Q08122-1|TLE3_MOUSE Isoform 1 of Transducin-like enhancer protein	14	7	7	7	4	3	5	5	4	3	5	5	4	3	5	5	13	13	13	84.507	782	782;772;771;769;767;764;762;760;783;716;712;702;335;236	19	15	14	18	66	2.5056e-105	0.78271	0.7743	13.104	3	NaN	NaN	NaN	0	NaN	NaN	NaN	0	0.78271	0.7743
Q9CR64;Q9CR64-2;E0CY07	Q9CR64;Q9CR64-2;E0CY07	3;3;3	3;3;3	3;3;3	Protein kish-A	Tmem167a;Tmem167	>sp|Q9CR64|KISHA_MOUSE Protein kish-A OS=Mus musculus GN=Tmem167a PE=2 SV=1;>sp|Q9CR64-2|KISHA_MOUSE Isoform 2 of Protein kish-A OS=Mus musculus GN=Tmem167a;>tr|E0CY07|E0CY07_MOUSE MCG116561, isoform CRA_b OS=Mus musculus GN=Tmem167 PE=4 SV=1	3	3	3	3	0	0	1	2	0	0	1	2	0	0	1	2	58.3	58.3	58.3	8.0738	72	72;60;56			1	3	4	1.6958e-07	0.85423	0.80133	7.1185	3	NaN	NaN	NaN	0	NaN	NaN	NaN	0	NaN	NaN
Q08775;Q08775-2;Q08775-8;Q08775-5;F8WHN7;Q08775-3;E9PUK7;E0CY45;Q08775-7;Q08775-4	Q08775;Q08775-2;Q08775-8;Q08775-5;F8WHN7;Q08775-3;E9PUK7;E0CY45;Q08775-7;Q08775-4	1;1;1;1;1;1;1;1;1;1	1;1;1;1;1;1;1;1;1;1	1;1;1;1;1;1;1;1;1;1	Runt-related transcription factor 2	Runx2	>sp|Q08775|RUNX2_MOUSE Runt-related transcription factor 2 OS=Mus musculus GN=Runx2 PE=1 SV=2;>sp|Q08775-2|RUNX2_MOUSE Isoform 2 of Runt-related transcription factor 2 OS=Mus musculus GN=Runx2;>sp|Q08775-8|RUNX2_MOUSE Isoform 8 of Runt-related transcriptio	10	1	1	1	1	1	1	1	1	1	1	1	1	1	1	1	3.6	3.6	3.6	66.204	607	607;596;548;528;514;513;506;492;360;306	2	5	2	3	12	1.1266e-07	NaN	NaN	NaN	0	NaN	NaN	NaN	0	NaN	NaN	NaN	0	NaN	NaN
E0CY51	E0CY51	3	1	1		Tkt	>tr|E0CY51|E0CY51_MOUSE Transketolase OS=Mus musculus GN=Tkt PE=4 SV=1	1	3	1	1	1	3	1	2	0	1	0	0	0	1	0	0	100	50	50	4.5171	42	42		1			1	1.1804e-09	NaN	NaN	NaN	0	NaN	NaN	NaN	0	NaN	NaN	NaN	0	NaN	NaN
E0CYA9;Q9CQ36	E0CYA9;Q9CQ36	6;6	6;6	6;6	DNA polymerase epsilon subunit 4	Pole4	>tr|E0CYA9|E0CYA9_MOUSE DNA polymerase epsilon subunit 4 OS=Mus musculus GN=Pole4 PE=4 SV=1;>sp|Q9CQ36|DPOE4_MOUSE DNA polymerase epsilon subunit 4 OS=Mus musculus GN=Pole4 PE=2 SV=1	2	6	6	6	1	2	6	3	1	2	6	3	1	2	6	3	63.9	63.9	63.9	12.455	119	119;118	2	3	11	5	21	1.3743e-94	1.3818	1.3153	31.108	14	0.42474	0.63502	8.7233	2	0.51304	0.73388	NaN	1	1.4588	1.3904
E0CYB4;E0CZD4	E0CYB4;E0CZD4	7;7	1;1	1;1		Actr1b	>tr|E0CYB4|E0CYB4_MOUSE Beta-centractin (Fragment) OS=Mus musculus GN=Actr1b PE=3 SV=1;>tr|E0CZD4|E0CZD4_MOUSE Beta-centractin (Fragment) OS=Mus musculus GN=Actr1b PE=3 SV=1	2	7	1	1	6	2	6	2	1	0	0	0	1	0	0	0	63.1	11.4	11.4	16.818	149	149;142	1				1	1.9846e-47	2.3517	3.3396	NaN	1	2.3517	3.3396	NaN	1	NaN	NaN	NaN	0	NaN	NaN
F7DEU6;P50096;E0CYE2;E0CXK0;F6XXH9	F7DEU6;P50096;E0CYE2	13;13;13;6;3	10;10;10;3;3	10;10;10;3;3	Inosine-5-monophosphate dehydrogenase;Inosine-5-monophosphate dehydrogenase 1	Impdh1	>tr|F7DEU6|F7DEU6_MOUSE Inosine-5-monophosphate dehydrogenase (Fragment) OS=Mus musculus GN=Impdh1 PE=3 SV=1;>sp|P50096|IMDH1_MOUSE Inosine-5-monophosphate dehydrogenase 1 OS=Mus musculus GN=Impdh1 PE=2 SV=2;>tr|E0CYE2|E0CYE2_MOUSE Inosine-5-monophospha	5	13	10	10	7	6	8	10	5	5	6	8	5	5	6	8	28.2	25.2	25.2	60.863	568	568;514;489;231;187	13	11	11	15	50	1.623e-65	1.442	1.303	62.587	33	0.39317	0.64395	49.215	9	0.40914	0.6623	45.433	8	2.4733	2.2298
Q9D0U6;E0CYF5;E0CYK4	Q9D0U6;E0CYF5;E0CYK4	2;2;2	2;2;2	2;2;2	Repressor of RNA polymerase III transcription MAF1 homolog	Maf1	>sp|Q9D0U6|MAF1_MOUSE Repressor of RNA polymerase III transcription MAF1 homolog OS=Mus musculus GN=Maf1 PE=2 SV=1;>tr|E0CYF5|E0CYF5_MOUSE Repressor of RNA polymerase III transcription MAF1 homolog OS=Mus musculus GN=Maf1 PE=4 SV=1;>tr|E0CYK4|E0CYK4_MOUSE	3	2	2	2	1	2	1	1	1	2	1	1	1	2	1	1	15.1	15.1	15.1	28.78	258	258;213;202	4	5	2	4	15	7.7355e-23	NaN	NaN	NaN	0	NaN	NaN	NaN	0	NaN	NaN	NaN	0	NaN	NaN
Q8C6G8;E0CYH4;F8WH48;F7DFQ2	Q8C6G8;E0CYH4	5;5;2;1	5;5;2;1	5;5;2;1	WD repeat-containing protein 26	Wdr26	>sp|Q8C6G8|WDR26_MOUSE WD repeat-containing protein 26 OS=Mus musculus GN=Wdr26 PE=1 SV=3;>tr|E0CYH4|E0CYH4_MOUSE WD repeat-containing protein 26 OS=Mus musculus GN=Wdr26 PE=4 SV=1	4	5	5	5	4	2	3	3	4	2	3	3	4	2	3	3	9	9	9	70.543	641	641;625;183;147	17	12	7	12	48	1.1065e-26	0.93617	0.9694	28.439	9	0.66017	0.90377	17.242	2	NaN	NaN	NaN	0	1.1876	1.1948
E0CYH7;E0CYM1;Q6P6L0;Q6P6L0-3	E0CYH7;E0CYM1;Q6P6L0;Q6P6L0-3	13;13;12;12	13;13;12;12	12;12;11;11	Filamin A-interacting protein 1-like	Filip1l	>tr|E0CYH7|E0CYH7_MOUSE Filamin A-interacting protein 1-like OS=Mus musculus GN=Filip1l PE=4 SV=1;>tr|E0CYM1|E0CYM1_MOUSE Filamin A-interacting protein 1-like OS=Mus musculus GN=Filip1l PE=4 SV=1;>sp|Q6P6L0|FIL1L_MOUSE Filamin A-interacting protein 1-like	4	13	13	12	8	4	10	5	8	4	10	5	7	4	9	4	13.7	13.7	13.1	129.84	1131	1131;893;1131;893	25	16	32	23	96	1.1111e-145	2.3405	2.1867	72.617	15	0.29605	0.38996	77.147	3	NaN	NaN	NaN	0	2.5514	2.2938
E0CYN9;E0CYK9	E0CYN9;E0CYK9	6;5	1;1	1;1		Osgep	>tr|E0CYN9|E0CYN9_MOUSE Probable tRNA threonylcarbamoyladenosine biosynthesis protein Osgep OS=Mus musculus GN=Osgep PE=4 SV=1;>tr|E0CYK9|E0CYK9_MOUSE Probable tRNA threonylcarbamoyladenosine biosynthesis protein Osgep (Fragment) OS=Mus musculus GN=Osgep P	2	6	1	1	2	2	3	3	0	1	0	0	0	1	0	0	37.8	4.7	4.7	27.961	254	254;156		1			1	1.5291e-36	NaN	NaN	NaN	0	NaN	NaN	NaN	0	NaN	NaN	NaN	0	NaN	NaN
E0CYQ0;E0CYD2;F6SYN4;E0CZ97;F7B6A4;F7C1U0	E0CYQ0;E0CYD2;F6SYN4;E0CZ97;F7B6A4;F7C1U0	7;6;6;6;6;4	7;6;6;6;6;4	7;6;6;6;6;4		Kctd17	>tr|E0CYQ0|E0CYQ0_MOUSE MCG13350, isoform CRA_b OS=Mus musculus GN=Kctd17 PE=4 SV=1;>tr|E0CYD2|E0CYD2_MOUSE Protein Kctd17 OS=Mus musculus GN=Kctd17 PE=4 SV=1;>tr|F6SYN4|F6SYN4_MOUSE Protein Kctd17 OS=Mus musculus GN=Kctd17 PE=4 SV=1;>tr|E0CZ97|E0CZ97_MOUS	6	7	7	7	2	3	6	2	2	3	6	2	2	3	6	2	39.9	39.9	39.9	33.342	296	296;250;225;213;206;210	3	8	12	6	29	4.9625e-34	0.39514	0.41057	99.555	29	2.0566	3.0782	35.021	3	1.7176	2.3742	21.174	8	0.33922	0.33939
E9QM73;Q3UH66-5;E9QMI8;Q3UH66;Q3UH66-3;E0CYT1;E9QJQ9;Q3UH66-4;E9QMI9;Q3UH66-7;E0CZE3;Q3UH66-2;E9Q6Q2;Q3UH66-6;F6SRP4	E9QM73;Q3UH66-5;E9QMI8;Q3UH66;Q3UH66-3;E0CYT1;E9QJQ9;Q3UH66-4;E9QMI9;Q3UH66-7;E0CZE3;Q3UH66-2;E9Q6Q2;Q3UH66-6;F6SRP4	5;5;5;5;5;5;5;5;5;5;5;5;5;5;3	2;2;2;2;2;2;2;2;2;2;2;2;2;2;2	2;2;2;2;2;2;2;2;2;2;2;2;2;2;2	Serine/threonine-protein kinase WNK2	Wnk2	>tr|E9QM73|E9QM73_MOUSE Serine/threonine-protein kinase WNK2 OS=Mus musculus GN=Wnk2 PE=4 SV=1;>sp|Q3UH66-5|WNK2_MOUSE Isoform 5 of Serine/threonine-protein kinase WNK2 OS=Mus musculus GN=Wnk2;>tr|E9QMI8|E9QMI8_MOUSE Serine/threonine-protein kinase WNK2 OS	15	5	2	2	0	2	4	3	0	0	1	1	0	0	1	1	2.5	1.2	1.2	234.04	2213	2213;2213;2149;2149;2149;2137;2101;2101;2092;2092;2065;2065;1991;1991;708			1	1	2	3.036e-10	0.77969	0.836	41.185	2	NaN	NaN	NaN	0	NaN	NaN	NaN	0	0.53331	0.62479
E0CYV0;E9PWE0;F7D432;P23506-2;P23506;F6V9F1;F6TXE3	E0CYV0;E9PWE0;F7D432;P23506-2;P23506;F6V9F1	16;16;16;16;16;9;4	16;16;16;16;16;9;4	16;16;16;16;16;9;4	Protein-L-isoaspartate O-methyltransferase;Protein-L-isoaspartate(D-aspartate) O-methyltransferase	Pcmt1	>tr|E0CYV0|E0CYV0_MOUSE Protein-L-isoaspartate O-methyltransferase OS=Mus musculus GN=Pcmt1 PE=3 SV=1;>tr|E9PWE0|E9PWE0_MOUSE Protein-L-isoaspartate O-methyltransferase OS=Mus musculus GN=Pcmt1 PE=3 SV=1;>tr|F7D432|F7D432_MOUSE Protein-L-isoaspartate O-met	7	16	16	16	9	11	14	11	9	11	14	11	9	11	14	11	55.6	55.6	55.6	30.441	286	286;285;271;228;227;177;111	23	27	39	23	112	0	0.83783	0.93966	15.878	112	0.65397	1.0968	18.082	23	0.71379	1.0145	15.196	27	0.9309	0.87595
Q9D291;Q8BIB9;E0CYV4	Q9D291;Q8BIB9;E0CYV4	4;4;4	4;4;4	4;4;4	Desumoylating isopeptidase 2	Pppde1	>sp|Q9D291|DESI2_MOUSE Desumoylating isopeptidase 2 OS=Mus musculus GN=Desi2 PE=2 SV=1;>tr|Q8BIB9|Q8BIB9_MOUSE Desumoylating isopeptidase 2 OS=Mus musculus GN=Desi2 PE=2 SV=1;>tr|E0CYV4|E0CYV4_MOUSE Desumoylating isopeptidase 2 (Fragment) OS=Mus musculus G	3	4	4	4	1	0	3	3	1	0	3	3	1	0	3	3	29.4	29.4	29.4	21.434	194	194;178;136	1		5	3	9	2.1567e-16	0.67131	0.63227	44.487	9	1.2791	1.842	NaN	1	NaN	NaN	NaN	0	0.65126	0.58731
E0CZ22;G3XA21;D3Z624	E0CZ22;G3XA21;D3Z624	17;17;9	17;17;9	13;13;5		Heatr7a	>tr|E0CZ22|E0CZ22_MOUSE Protein Heatr7a OS=Mus musculus GN=Heatr7a PE=4 SV=1;>tr|G3XA21|G3XA21_MOUSE MCG134445, isoform CRA_a OS=Mus musculus GN=Heatr7a PE=4 SV=1;>tr|D3Z624|D3Z624_MOUSE Protein Heatr7a OS=Mus musculus GN=Heatr7a PE=4 SV=2	3	17	17	13	5	9	9	15	5	9	9	15	4	7	6	12	14.9	14.9	12.1	181.79	1640	1640;1631;1094	8	19	24	26	77	1.1218e-76	0.89829	0.90216	20.801	75	0.50234	0.66869	17.976	8	0.52787	0.64259	15.901	18	0.96236	0.93033
E9QAK8;Q6NZK5;E9QPX6;E0CZ24	E9QAK8;Q6NZK5;E9QPX6;E0CZ24	2;2;2;2	2;2;2;2	2;2;2;2	Uncharacterized protein KIAA1328	AW554918;Kiaa1328	>tr|E9QAK8|E9QAK8_MOUSE Protein AW554918 OS=Mus musculus GN=AW554918 PE=4 SV=1;>sp|Q6NZK5|K1328_MOUSE Uncharacterized protein KIAA1328 OS=Mus musculus GN=Kiaa1328 PE=2 SV=2;>tr|E9QPX6|E9QPX6_MOUSE Protein AW554918 OS=Mus musculus GN=AW554918 PE=4 SV=1;>tr|	4	2	2	2	1	1	1	1	1	1	1	1	1	1	1	1	3.3	3.3	3.3	69.85	612	612;612;579;376	5	1	2	3	11	1.5807e-10	0.27742	0.39945	NaN	1	NaN	NaN	NaN	0	0.27742	0.39945	NaN	1	NaN	NaN
Q8CIV8;E0CZ81;E0CXJ6	Q8CIV8;E0CZ81	3;3;1	3;3;1	3;3;1	Tubulin-specific chaperone E	Tbce	>sp|Q8CIV8|TBCE_MOUSE Tubulin-specific chaperone E OS=Mus musculus GN=Tbce PE=1 SV=1;>tr|E0CZ81|E0CZ81_MOUSE Tubulin-specific chaperone E OS=Mus musculus GN=Tbce PE=4 SV=1	3	3	3	3	1	0	1	1	1	0	1	1	1	0	1	1	8.4	8.4	8.4	59.085	524	524;428;75	1		1	1	3	2.3465e-07	1.096	1.0605	21.674	3	0.57848	0.88597	NaN	1	NaN	NaN	NaN	0	1.4305	1.364
E0CZB3;E9QJZ1;Q9EPV8;E0CY38;E0CYW1;E0CY91;G3UWR6	E0CZB3;E9QJZ1;Q9EPV8;E0CY38;E0CYW1;E0CY91	3;2;2;2;2;2;1	3;2;2;2;2;2;1	3;2;2;2;2;2;1	Ubiquitin-like protein 5	Ubl5;Gm2001	>tr|E0CZB3|E0CZB3_MOUSE Ubiquitin-like protein 5 OS=Mus musculus GN=Ubl5 PE=4 SV=1;>tr|E9QJZ1|E9QJZ1_MOUSE Protein Gm16381 OS=Mus musculus GN=Gm16381 PE=4 SV=1;>sp|Q9EPV8|UBL5_MOUSE Ubiquitin-like protein 5 OS=Mus musculus GN=Ubl5 PE=1 SV=1;>tr|E0CY38|E0CY	7	3	3	3	0	3	0	1	0	3	0	1	0	3	0	1	26.5	26.5	26.5	13.052	113	113;73;73;72;56;47;80		4		2	6	1.323e-06	0.929	1.063	12.735	6	NaN	NaN	NaN	0	0.72839	1.0646	16.197	4	NaN	NaN
Q8VBW6;E0CZE0	Q8VBW6;E0CZE0	19;19	19;19	19;19	NEDD8-activating enzyme E1 regulatory subunit	Nae1	>sp|Q8VBW6|ULA1_MOUSE NEDD8-activating enzyme E1 regulatory subunit OS=Mus musculus GN=Nae1 PE=2 SV=1;>tr|E0CZE0|E0CZE0_MOUSE NEDD8-activating enzyme E1 regulatory subunit OS=Mus musculus GN=Nae1 PE=4 SV=1	2	19	19	19	11	11	15	8	11	11	15	8	11	11	15	8	53.6	53.6	53.6	60.273	534	534;510	18	19	26	14	77	0	0.83485	0.89631	13.717	76	0.58242	0.88421	11.268	17	0.63646	0.92553	14.829	19	0.95286	0.88567
E2JF22;E9PUQ9;F7AC58;F6PYU5;F6QY99	E2JF22;E9PUQ9;F7AC58	16;16;14;4;2	16;16;14;4;2	15;15;13;4;2	Piezo-type mechanosensitive ion channel component 1	Piezo1;Fam38a	>sp|E2JF22|PIEZ1_MOUSE Piezo-type mechanosensitive ion channel component 1 OS=Mus musculus GN=Piezo1 PE=2 SV=1;>tr|E9PUQ9|E9PUQ9_MOUSE Protein Fam38a OS=Mus musculus GN=Fam38a PE=4 SV=1;>tr|F7AC58|F7AC58_MOUSE Protein Fam38a (Fragment) OS=Mus musculus GN=F	5	16	16	15	6	9	12	9	6	9	12	9	5	9	12	9	7.4	7.4	7.1	292	2547	2547;2546;2109;1085;1003	21	33	29	30	113	4.0378e-58	0.83496	0.85536	34.358	50	1.0983	1.536	23.14	8	1.0711	1.4856	26.744	13	0.69598	0.7917
E9PU87;F6S7W6;Q6P4S6;F6U6U5;F6U8X4;Q6P4S6-2	E9PU87;F6S7W6;Q6P4S6;F6U6U5	13;12;12;11;5;5	13;12;12;11;5;5	13;12;12;11;5;5	Serine/threonine-protein kinase SIK3	Sik3	>tr|E9PU87|E9PU87_MOUSE Serine/threonine-protein kinase SIK3 OS=Mus musculus GN=Sik3 PE=4 SV=1;>tr|F6S7W6|F6S7W6_MOUSE Serine/threonine-protein kinase SIK3 (Fragment) OS=Mus musculus GN=Sik3 PE=4 SV=1;>sp|Q6P4S6|SIK3_MOUSE Serine/threonine-protein kinase S	6	13	13	13	10	8	8	8	10	8	8	8	10	8	8	8	12.5	12.5	12.5	150.66	1369	1369;1319;1311;1214;506;487	64	62	36	51	213	1.6557e-96	0.74076	0.95945	3.2536	2	0.74076	0.95945	3.2536	2	NaN	NaN	NaN	0	NaN	NaN
Q91X20;E9PU93;D3YYA0;D6RI55;D6RET1	Q91X20;E9PU93;D3YYA0	7;7;6;2;1	7;7;6;2;1	7;7;6;2;1	Set1/Ash2 histone methyltransferase complex subunit ASH2	Ash2l	>sp|Q91X20|ASH2L_MOUSE Set1/Ash2 histone methyltransferase complex subunit ASH2 OS=Mus musculus GN=Ash2l PE=1 SV=1;>tr|E9PU93|E9PU93_MOUSE Set1/Ash2 histone methyltransferase complex subunit ASH2 OS=Mus musculus GN=Ash2l PE=4 SV=1;>tr|D3YYA0|D3YYA0_MOUSE S	5	7	7	7	6	5	3	3	6	5	3	3	6	5	3	3	14.4	14.4	14.4	68.249	623	623;534;501;346;352	14	10	5	9	38	1.6027e-63	0.80249	1.0487	12.218	21	0.71377	0.98908	13.941	9	0.7021	0.947	11.25	5	1.21	1.1128
E9PU96;Q571H0	E9PU96;Q571H0	8;8	8;8	8;8	Nucleolar pre-ribosomal-associated protein 1	Urb1	>tr|E9PU96|E9PU96_MOUSE Nucleolar pre-ribosomal-associated protein 1 OS=Mus musculus GN=Urb1 PE=4 SV=1;>sp|Q571H0|NPA1P_MOUSE Nucleolar pre-ribosomal-associated protein 1 OS=Mus musculus GN=Urb1 PE=2 SV=2	2	8	8	8	0	2	5	4	0	2	5	4	0	2	5	4	5.2	5.2	5.2	254.84	2277	2277;2274		3	5	6	14	4.7154e-16	1.1046	1.1881	22.891	12	NaN	NaN	NaN	0	1.1702	1.2601	0.1111	2	1.0401	1.0322
Q5BLK4;E9PUA2	Q5BLK4;E9PUA2	7;7	7;7	7;7	Terminal uridylyltransferase 7	Zcchc6	>sp|Q5BLK4|TUT7_MOUSE Terminal uridylyltransferase 7 OS=Mus musculus GN=Zcchc6 PE=1 SV=3;>tr|E9PUA2|E9PUA2_MOUSE Terminal uridylyltransferase 7 OS=Mus musculus GN=Zcchc6 PE=4 SV=1	2	7	7	7	4	2	2	3	4	2	2	3	4	2	2	3	6.2	6.2	6.2	169.1	1491	1491;1474	4	7	2	3	16	6.5634e-20	0.95	1.004	51.019	10	0.49916	0.63888	7.775	4	1.3181	1.9069	NaN	1	1.6462	1.5986
E9PUA3;Q8R0S2-2;Q8R0S2	E9PUA3;Q8R0S2-2;Q8R0S2	5;5;5	5;5;5	5;5;5	IQ motif and SEC7 domain-containing protein 1	Iqsec1	>tr|E9PUA3|E9PUA3_MOUSE IQ motif and SEC7 domain-containing protein 1 OS=Mus musculus GN=Iqsec1 PE=4 SV=1;>sp|Q8R0S2-2|IQEC1_MOUSE Isoform 2 of IQ motif and SEC7 domain-containing protein 1 OS=Mus musculus GN=Iqsec1;>sp|Q8R0S2|IQEC1_MOUSE IQ motif and SEC7	3	5	5	5	2	3	5	2	2	3	5	2	2	3	5	2	4.9	4.9	4.9	122.65	1099	1099;962;961	10	16	9	10	45	8.4856e-85	1.4425	1.3606	2.9961	2	NaN	NaN	NaN	0	NaN	NaN	NaN	0	1.4425	1.3606
Q9QWT9;E9PUA5;Q9QWT9-2;Q9QWT9-3;G3UXN2	Q9QWT9;E9PUA5;Q9QWT9-2;Q9QWT9-3	7;7;7;7;2	7;7;7;7;2	7;7;7;7;2	Kinesin-like protein KIFC1	Kifc1;Kifc5b	>sp|Q9QWT9|KIFC1_MOUSE Kinesin-like protein KIFC1 OS=Mus musculus GN=Kifc1 PE=1 SV=2;>tr|E9PUA5|E9PUA5_MOUSE Protein Kifc5b OS=Mus musculus GN=Kifc5b PE=3 SV=1;>sp|Q9QWT9-2|KIFC1_MOUSE Isoform 2 of Kinesin-like protein KIFC1 OS=Mus musculus GN=Kifc1;>sp|Q9	5	7	7	7	4	2	2	1	4	2	2	1	4	2	2	1	10.5	10.5	10.5	74.152	674	674;672;631;611;218	5	3	3	1	12	4.7024e-12	1.1357	1.0646	74.638	7	0.58134	0.72553	90.976	5	NaN	NaN	NaN	0	1.1357	1.0646
E9PUB7;Q2YDW2;D3YX87;Q2YDW2-2	E9PUB7;Q2YDW2;D3YX87;Q2YDW2-2	8;8;7;6	8;8;7;6	8;8;7;6	Protein misato homolog 1	Msto1	>tr|E9PUB7|E9PUB7_MOUSE Protein misato homolog 1 OS=Mus musculus GN=Msto1 PE=4 SV=1;>sp|Q2YDW2|MSTO1_MOUSE Protein misato homolog 1 OS=Mus musculus GN=Msto1 PE=2 SV=1;>tr|D3YX87|D3YX87_MOUSE Protein misato homolog 1 OS=Mus musculus GN=Msto1 PE=4 SV=1;>sp|Q	4	8	8	8	6	1	2	3	6	1	2	3	6	1	2	3	20.9	20.9	20.9	61.207	556	556;556;586;444	8	1	2	4	15	1.0637e-23	0.61196	0.86686	25.74	15	0.57704	0.82657	6.5421	8	0.52463	0.72623	NaN	1	1.0944	1.0154
E9PUC5;Q2PFD7-3;Q8C0E9	E9PUC5;Q2PFD7-3;Q8C0E9	2;1;1	1;0;1	1;0;1		Psd3	>tr|E9PUC5|E9PUC5_MOUSE PH and SEC7 domain-containing protein 3 OS=Mus musculus GN=Psd3 PE=4 SV=1;>sp|Q2PFD7-3|PSD3_MOUSE Isoform 3 of PH and SEC7 domain-containing protein 3 OS=Mus musculus GN=Psd3;>tr|Q8C0E9|Q8C0E9_MOUSE PH and SEC7 domain-containing pro	3	2	1	1	1	0	1	0	0	0	1	0	0	0	1	0	7.4	2.9	2.9	42.299	376	376;518;390			1		1	1.0377e-23	NaN	NaN	NaN	0	NaN	NaN	NaN	0	NaN	NaN	NaN	0	NaN	NaN
Q5SSL4-2;Q5SSL4;E9PUE7;Q5SSL4-4;Q5SSL4-3;H3BJY3;H3BKV6;H3BKT3;H3BL84	Q5SSL4-2;Q5SSL4;E9PUE7;Q5SSL4-4;Q5SSL4-3	6;6;6;5;4;2;1;1;1	6;6;6;5;4;2;1;1;1	5;5;5;4;3;1;1;1;1	Active breakpoint cluster region-related protein	Abr	>sp|Q5SSL4-2|ABR_MOUSE Isoform 2 of Active breakpoint cluster region-related protein OS=Mus musculus GN=Abr;>sp|Q5SSL4|ABR_MOUSE Active breakpoint cluster region-related protein OS=Mus musculus GN=Abr PE=2 SV=1;>tr|E9PUE7|E9PUE7_MOUSE Active breakpoint clu	9	6	6	5	0	0	5	1	0	0	5	1	0	0	4	1	8.4	8.4	7.2	98.987	871	871;859;813;822;641;146;161;128;92			6	1	7	7.6684e-12	0.73357	0.73059	7.6335	5	NaN	NaN	NaN	0	NaN	NaN	NaN	0	0.73357	0.73059
Q61210-5;E9PUF7;Q61210;Q61210-2;Q61210-4;Q61210-3;F6ZN61;D3YVJ9	Q61210-5;E9PUF7;Q61210;Q61210-2;Q61210-4;Q61210-3;F6ZN61	25;25;25;25;21;19;13;1	25;25;25;25;21;19;13;1	25;25;25;25;21;19;13;1	Rho guanine nucleotide exchange factor 1	Arhgef1	>sp|Q61210-5|ARHG1_MOUSE Isoform 5 of Rho guanine nucleotide exchange factor 1 OS=Mus musculus GN=Arhgef1;>tr|E9PUF7|E9PUF7_MOUSE Rho guanine nucleotide exchange factor 1 OS=Mus musculus GN=Arhgef1 PE=4 SV=1;>sp|Q61210|ARHG1_MOUSE Rho guanine nucleotide ex	8	25	25	25	7	2	16	18	7	2	16	18	7	2	16	18	34.8	34.8	34.8	109.25	979	979;976;920;919;856;791;616;101	14	4	32	26	76	2.652e-118	1.0574	1.0314	28.535	73	0.53346	0.78898	14.741	14	0.63959	0.79338	17.282	4	1.0953	1.0431
Q61211-2;Q61211;E9PUG7;Q8C8I3	Q61211-2;Q61211;E9PUG7;Q8C8I3	2;2;2;2	2;2;2;2	2;2;2;2	Eukaryotic translation initiation factor 2D	Eif2d	>sp|Q61211-2|EIF2D_MOUSE Isoform 2 of Eukaryotic translation initiation factor 2D OS=Mus musculus GN=Eif2d;>sp|Q61211|EIF2D_MOUSE Eukaryotic translation initiation factor 2D OS=Mus musculus GN=Eif2d PE=2 SV=3;>tr|E9PUG7|E9PUG7_MOUSE Eukaryotic translation	4	2	2	2	1	0	1	0	1	0	1	0	1	0	1	0	6.5	6.5	6.5	64.568	587	587;570;552;453	1		1		2	3.0741e-08	0.66802	0.79427	57.798	2	0.35328	0.5278	NaN	1	NaN	NaN	NaN	0	1.2632	1.1953
E9PUH7;D3YZ00;B1AUB6;A2ADI3;Q02780-5;B1AUB8	E9PUH7;D3YZ00	8;7;3;3;2;2	8;7;3;3;2;2	0;0;0;0;0;0	Nuclear factor 1	Nfix	>tr|E9PUH7|E9PUH7_MOUSE Nuclear factor 1 OS=Mus musculus GN=Nfix PE=3 SV=1;>tr|D3YZ00|D3YZ00_MOUSE Nuclear factor 1 (Fragment) OS=Mus musculus GN=Nfix PE=3 SV=1	6	8	8	0	3	4	7	4	3	4	7	4	0	0	0	0	23.9	23.9	0	54.161	494	494;488;225;175;466;380	6	19	16	14	55	1.7644e-113	0.77054	0.77882	28.934	11	0.83462	1.0879	23.983	3	NaN	NaN	NaN	0	0.7184	0.64937
E9PUI5;Q8K012;E9PUK3;Q8K012-2	E9PUI5;Q8K012;E9PUK3;Q8K012-2	5;5;5;5	5;5;5;5	5;5;5;5	Formin-binding protein 1-like	Fnbp1l	>tr|E9PUI5|E9PUI5_MOUSE Formin-binding protein 1-like OS=Mus musculus GN=Fnbp1l PE=4 SV=1;>sp|Q8K012|FBP1L_MOUSE Formin-binding protein 1-like OS=Mus musculus GN=Fnbp1l PE=1 SV=2;>tr|E9PUK3|E9PUK3_MOUSE Formin-binding protein 1-like OS=Mus musculus GN=Fnbp	4	5	5	5	3	3	3	3	3	3	3	3	3	3	3	3	10.2	10.2	10.2	70.465	609	609;605;551;550	43	20	40	36	139	8.5818e-18	1.5641	1.5353	NaN	1	NaN	NaN	NaN	0	NaN	NaN	NaN	0	1.5641	1.5353
E9PUM4;Q71LX4	E9PUM4;Q71LX4	50;43	29;26	29;26	Talin-2	Tln2	>tr|E9PUM4|E9PUM4_MOUSE Talin-2 OS=Mus musculus GN=Tln2 PE=4 SV=1;>sp|Q71LX4|TLN2_MOUSE Talin-2 OS=Mus musculus GN=Tln2 PE=1 SV=3	2	50	29	29	18	26	40	31	3	9	23	14	3	9	23	14	23.7	17.5	17.5	271.66	2542	2542;2375	7	21	40	42	110	0	0.24541	0.24976	175.77	76	5.3314	5.6296	42.343	2	5.8028	7.7078	41.011	15	0.1224	0.12484
Q9Z138;E9PUN5;Q9Z139	Q9Z138;E9PUN5	6;6;1	6;6;1	6;6;1	Tyrosine-protein kinase transmembrane receptor ROR2	Ror2	>sp|Q9Z138|ROR2_MOUSE Tyrosine-protein kinase transmembrane receptor ROR2 OS=Mus musculus GN=Ror2 PE=1 SV=2;>tr|E9PUN5|E9PUN5_MOUSE Tyrosine-protein kinase transmembrane receptor ROR2 OS=Mus musculus GN=Ror2 PE=4 SV=1	3	6	6	6	5	1	1	2	5	1	1	2	5	1	1	2	8.3	8.3	8.3	105	944	944;932;937	5	6	2	2	15	3.7078e-13	1.0084	1.4329	45.635	4	1.0397	1.5021	8.4118	3	NaN	NaN	NaN	0	NaN	NaN
E9PUQ5;Q921M4;Q921M4-2;A2AN46;A2AN45;A2AN48;A2AN44;A2AN42	E9PUQ5;Q921M4;Q921M4-2	34;32;32;11;10;9;7;4	34;32;32;11;10;9;7;4	34;32;32;11;10;9;7;4	Golgin subfamily A member 2	Golga2	>tr|E9PUQ5|E9PUQ5_MOUSE Golgin subfamily A member 2 OS=Mus musculus GN=Golga2 PE=4 SV=1;>sp|Q921M4|GOGA2_MOUSE Golgin subfamily A member 2 OS=Mus musculus GN=Golga2 PE=1 SV=3;>sp|Q921M4-2|GOGA2_MOUSE Isoform 2 of Golgin subfamily A member 2 OS=Mus musculus	8	34	34	34	20	18	27	21	20	18	27	21	20	18	27	21	44.8	44.8	44.8	116.28	1026	1026;999;967;331;272;282;250;201	36	36	45	41	158	6.4987e-181	1.1253	1.4425	39.016	148	1.053	1.5064	41.888	35	0.85277	1.1536	35.436	33	1.4304	1.4624
E9PUQ7;Q3UYU2;Q8BNV1;F6ZHN3;F6SY41	E9PUQ7;Q3UYU2;Q8BNV1;F6ZHN3	14;14;12;8;2	14;14;12;8;2	14;14;12;8;2	tRNA (uracil-5-)-methyltransferase homolog A	Trmt2a	>tr|E9PUQ7|E9PUQ7_MOUSE tRNA (uracil-5-)-methyltransferase homolog A OS=Mus musculus GN=Trmt2a PE=4 SV=1;>tr|Q3UYU2|Q3UYU2_MOUSE HpaII tinys locus 9c, isoform CRA_a OS=Mus musculus GN=Trmt2a PE=2 SV=1;>sp|Q8BNV1|TRM2A_MOUSE tRNA (uracil-5-)-methyltransfera	5	14	14	14	9	2	7	6	9	2	7	6	9	2	7	6	30.5	30.5	30.5	67.634	613	613;613;574;281;70	11	3	10	7	31	1.0258e-54	1.0583	1.0708	47.13	30	0.47111	0.6916	18.131	11	0.511	0.71358	33.561	3	1.7927	1.7065
E9PUQ8	E9PUQ8	3	3	3		Dgkd	>tr|E9PUQ8|E9PUQ8_MOUSE Protein Dgkd OS=Mus musculus GN=Dgkd PE=4 SV=1	1	3	3	3	2	1	1	2	2	1	1	2	2	1	1	2	2	2	2	135.21	1220	1220	5	4	2	3	14	4.3019e-06	2.4663	2.1725	NaN	1	NaN	NaN	NaN	0	NaN	NaN	NaN	0	NaN	NaN
E9PUR0;E9Q1M6;F7DE17;F7C545	E9PUR0;E9Q1M6	14;14;4;4	5;5;4;1	4;4;3;1		Ankhd1	>tr|E9PUR0|E9PUR0_MOUSE Protein Ankhd1 OS=Mus musculus GN=Ankhd1 PE=4 SV=1;>tr|E9Q1M6|E9Q1M6_MOUSE Protein Ankhd1 OS=Mus musculus GN=Ankhd1 PE=4 SV=1	4	14	5	4	11	7	10	9	3	2	4	1	2	1	3	1	7.3	2.2	1.6	269.67	2548	2548;2485;1021;214	11	3	12	1	27	6.1572e-159	3.3117	3.4358	NaN	1	NaN	NaN	NaN	0	NaN	NaN	NaN	0	3.3117	3.4358
E9PYV1;E9PUR6;P06537-2;P06537;P06537-4;P06537-3;E9Q310;E9Q8A6;D3YTK8;D3Z280	E9PYV1;E9PUR6;P06537-2;P06537;P06537-4;P06537-3;E9Q310	5;5;5;5;4;4;4;2;1;1	5;5;5;5;4;4;4;2;1;1	5;5;5;5;4;4;4;2;1;1	Glucocorticoid receptor	Nr3c1	>tr|E9PYV1|E9PYV1_MOUSE Glucocorticoid receptor OS=Mus musculus GN=Nr3c1 PE=3 SV=1;>tr|E9PUR6|E9PUR6_MOUSE Glucocorticoid receptor OS=Mus musculus GN=Nr3c1 PE=3 SV=1;>sp|P06537-2|GCR_MOUSE Isoform 2 of Glucocorticoid receptor OS=Mus musculus GN=Nr3c1;>sp|P	10	5	5	5	2	2	5	1	2	2	5	1	2	2	5	1	9.2	9.2	9.2	87.319	793	793;792;784;783;757;756;488;130;49;24	4	3	7	2	16	1.7131e-156	0.82901	0.86138	51.78	7	0.26087	0.34332	NaN	1	0.69053	0.86138	NaN	1	0.98927	1.011
Q8K4R9;E9PUT4;Q8K4R9-2;Q8K4R9-3;E9QQ48	Q8K4R9;E9PUT4;Q8K4R9-2;Q8K4R9-3	5;5;5;5;1	5;5;5;5;1	5;5;5;5;1	Disks large-associated protein 5	Dlgap5	>sp|Q8K4R9|DLGP5_MOUSE Disks large-associated protein 5 OS=Mus musculus GN=Dlgap5 PE=1 SV=2;>tr|E9PUT4|E9PUT4_MOUSE Disks large-associated protein 5 OS=Mus musculus GN=Dlgap5 PE=4 SV=1;>sp|Q8K4R9-2|DLGP5_MOUSE Isoform 2 of Disks large-associated protein 5	5	5	5	5	3	3	4	3	3	3	4	3	3	3	4	3	6.4	6.4	6.4	90.195	808	808;758;758;627;303	4	8	8	4	24	2.7992e-15	1.6396	1.6323	88.955	3	0.28967	0.4281	NaN	1	NaN	NaN	NaN	0	1.6396	1.6323
E9PUU4	E9PUU4	43	43	2		Gemin5	>tr|E9PUU4|E9PUU4_MOUSE Gem-associated protein 5 OS=Mus musculus GN=Gemin5 PE=4 SV=1	1	43	43	2	16	22	20	26	16	22	20	26	2	2	2	2	37.9	37.9	0.9	166.75	1503	1503	29	34	32	42	137	1.2597e-192	1.6777	1.6406	107.32	96	0.19571	0.26747	29.019	20	0.27015	0.32464	27.832	23	2.7071	2.5726
E9PV14	E9PV14	7	1	1		Epb4.1l1	>tr|E9PV14|E9PV14_MOUSE Protein Epb4.1l1 (Fragment) OS=Mus musculus GN=Epb4.1l1 PE=4 SV=1	1	7	1	1	4	1	4	3	0	0	1	0	0	0	1	0	8.1	0.7	0.7	117.17	1064	1064			2		2	4.3474e-15	1.2195	1.1234	4.3966	2	NaN	NaN	NaN	0	NaN	NaN	NaN	0	1.2195	1.1234
E9PV35;E9PWV9;P27699;P27699-5;D3Z2U7;F6QKL8;F6XRJ7;D3Z7M6;P27699-6;F6W4F5;D3YXV5;P27699-7;F6Q346;P27699-8;P27699-9;D3Z011;F6RB97;D3Z0R0;P27699-2;P27699-3;D3Z4K8;P27699-10;P27699-4;F6U9F5;D3Z773;Q3TTH6;Q9CQ87	E9PV35;E9PWV9;P27699;P27699-5;D3Z2U7;F6QKL8;F6XRJ7;D3Z7M6;P27699-6;F6W4F5;D3YXV5;P27699-7;F6Q346;P27699-8;P27699-9;D3Z011;F6RB97;D3Z0R0;P27699-2;P27699-3;D3Z4K8;P27699-10;P27699-4;F6U9F5;D3Z773;Q3TTH6;Q9CQ87	2;2;1;1;1;1;1;1;1;1;1;1;1;1;1;1;1;1;1;1;1;1;1;1;1;1;1	2;2;1;1;1;1;1;1;1;1;1;1;1;1;1;1;1;1;1;1;1;1;1;1;1;1;1	2;2;1;1;1;1;1;1;1;1;1;1;1;1;1;1;1;1;1;1;1;1;1;1;1;1;1	cAMP-responsive element modulator	Crem	>tr|E9PV35|E9PV35_MOUSE cAMP-responsive element modulator OS=Mus musculus GN=Crem PE=4 SV=1;>tr|E9PWV9|E9PWV9_MOUSE cAMP-responsive element modulator OS=Mus musculus GN=Crem PE=4 SV=1;>sp|P27699|CREM_MOUSE cAMP-responsive element modulator OS=Mus musculus	27	2	2	2	0	2	0	1	0	2	0	1	0	2	0	1	8.2	8.2	8.2	32.537	304	304;304;357;345;341;335;331;329;308;298;296;294;284;282;282;280;272;268;245;245;243;233;233;223;217;173;124		4		1	5	3.2074e-05	NaN	NaN	NaN	0	NaN	NaN	NaN	0	NaN	NaN	NaN	0	NaN	NaN
E9PV41;E9PXV7;O08808;D3Z074;Q6NS79	E9PV41;E9PXV7;O08808;D3Z074;Q6NS79	44;43;43;41;41	44;43;43;41;41	44;43;43;41;41	Protein diaphanous homolog 1	Diap1;Diaph1	>tr|E9PV41|E9PV41_MOUSE Protein Diap1 OS=Mus musculus GN=Diap1 PE=4 SV=1;>tr|E9PXV7|E9PXV7_MOUSE Protein Diap1 OS=Mus musculus GN=Diap1 PE=4 SV=1;>sp|O08808|DIAP1_MOUSE Protein diaphanous homolog 1 OS=Mus musculus GN=Diaph1 PE=1 SV=1;>tr|D3Z074|D3Z074_MOUS	5	44	44	44	17	23	36	19	17	23	36	19	17	23	36	19	42.2	42.2	42.2	140.4	1264	1264;1255;1255;1220;1220	30	44	69	43	186	7.9864e-257	1.3194	1.2754	36.054	183	0.5417	0.76058	14.963	29	0.54327	0.71353	14.318	44	1.4335	1.4296
O35143;E9PV44	O35143;E9PV44	7;7	7;7	7;7	ATPase inhibitor, mitochondrial	Atpif1	>sp|O35143|ATIF1_MOUSE ATPase inhibitor, mitochondrial OS=Mus musculus GN=Atpif1 PE=2 SV=2;>tr|E9PV44|E9PV44_MOUSE ATPase inhibitor, mitochondrial OS=Mus musculus GN=Atpif1 PE=4 SV=1	2	7	7	7	0	4	0	6	0	4	0	6	0	4	0	6	25.5	25.5	25.5	12.159	106	106;74		10		14	24	9.7902e-23	0.54097	0.54024	91.239	24	NaN	NaN	NaN	0	1.9588	2.9398	11.08	10	NaN	NaN
E9PV82;E9PV65	E9PV82;E9PV65	1;1	1;1	1;1		Fam53a	>tr|E9PV82|E9PV82_MOUSE Protein Fam53a OS=Mus musculus GN=Fam53a PE=4 SV=1;>tr|E9PV65|E9PV65_MOUSE Protein Fam53a OS=Mus musculus GN=Fam53a PE=4 SV=1	2	1	1	1	1	1	0	1	1	1	0	1	1	1	0	1	2.5	2.5	2.5	43.083	402	402;321	2	2		2	6	7.8625e-05	NaN	NaN	NaN	0	NaN	NaN	NaN	0	NaN	NaN	NaN	0	NaN	NaN
Q61026;E9PV80;D3Z4F6	Q61026;E9PV80;D3Z4F6	5;5;3	5;5;3	5;5;3	Nuclear receptor coactivator 2	Ncoa2	>sp|Q61026|NCOA2_MOUSE Nuclear receptor coactivator 2 OS=Mus musculus GN=Ncoa2 PE=1 SV=3;>tr|E9PV80|E9PV80_MOUSE Nuclear receptor coactivator 2 OS=Mus musculus GN=Ncoa2 PE=4 SV=1;>tr|D3Z4F6|D3Z4F6_MOUSE Nuclear receptor coactivator 2 (Fragment) OS=Mus musc	3	5	5	5	2	2	2	4	2	2	2	4	2	2	2	4	4	4	4	158.46	1462	1462;1393;115	10	9	13	19	51	7.0503e-41	NaN	NaN	NaN	0	NaN	NaN	NaN	0	NaN	NaN	NaN	0	NaN	NaN
E9PVA2;Q9DB85	E9PVA2;Q9DB85	5;5	5;5	5;5	Ribosomal RNA-processing protein 8	Rrp8	>tr|E9PVA2|E9PVA2_MOUSE Ribosomal RNA-processing protein 8 OS=Mus musculus GN=Rrp8 PE=4 SV=1;>sp|Q9DB85|RRP8_MOUSE Ribosomal RNA-processing protein 8 OS=Mus musculus GN=Rrp8 PE=1 SV=1	2	5	5	5	2	2	4	2	2	2	4	2	2	2	4	2	13.1	13.1	13.1	56.511	503	503;457	10	4	10	8	32	1.8264e-14	1.3283	1.2166	53.345	6	0.41635	0.56354	NaN	1	0.53967	0.66605	NaN	1	1.3283	1.2166
E9PVA3	E9PVA3	10	1	1		Gm1966	>tr|E9PVA3|E9PVA3_MOUSE Protein Gm1966 OS=Mus musculus GN=Gm1966 PE=4 SV=1	1	10	1	1	7	5	8	5	0	0	1	1	0	0	1	1	11.1	1.4	1.4	107.08	931	931			2	2	4	3.7128e-37	2.4402	2.4056	121.98	4	NaN	NaN	NaN	0	NaN	NaN	NaN	0	6.5879	6.366
E9PVA8;Q8BIX2	E9PVA8	158;65	158;65	158;65		Gcn1l1	>tr|E9PVA8|E9PVA8_MOUSE Protein Gcn1l1 OS=Mus musculus GN=Gcn1l1 PE=4 SV=1	2	158	158	158	100	123	134	109	100	123	134	109	100	123	134	109	66.1	66.1	66.1	293.02	2671	2671;1054	256	319	322	381	1278	0	1.0163	1.0195	33.978	1266	0.54423	0.68226	25.028	256	0.57631	0.82552	19.817	317	1.1715	1.1479
E9PVC5;E9Q770	E9PVC5	82;35	82;35	1;1		Eif4g1	>tr|E9PVC5|E9PVC5_MOUSE Eukaryotic translation initiation factor 4 gamma 1 OS=Mus musculus GN=Eif4g1 PE=4 SV=1	2	82	82	1	61	60	75	57	61	60	75	57	1	1	1	1	51.3	51.3	0.6	175.46	1594	1594;958	307	268	313	323	1211	0	1.0702	1.2261	66.254	874	0.46885	0.64577	66.257	219	0.48295	0.5179	70.133	183	1.4056	1.3748
E9PVG7;F8VPL5;P97820	E9PVG7;F8VPL5;P97820	19;19;19	19;19;19	10;10;10	Mitogen-activated protein kinase kinase kinase kinase 4	Map4k4	>tr|E9PVG7|E9PVG7_MOUSE Mitogen-activated protein kinase kinase kinase kinase 4 OS=Mus musculus GN=Map4k4 PE=4 SV=2;>tr|F8VPL5|F8VPL5_MOUSE Mitogen-activated protein kinase kinase kinase kinase 4 OS=Mus musculus GN=Map4k4 PE=4 SV=1;>sp|P97820|M4K4_MOUSE Mi	3	19	19	10	10	10	13	6	10	10	13	6	6	6	6	5	15.3	15.3	9.2	146.72	1288	1288;1234;1233	57	34	35	32	158	0	0.75494	1.0119	49.703	42	0.3912	0.55323	34.898	13	0.59253	0.73412	46.426	10	1.3255	1.3167
E9PVN6;Q9CR63	E9PVN6	7;1	1;1	1;1		Gm20498	>tr|E9PVN6|E9PVN6_MOUSE Protein Gm20498 OS=Mus musculus GN=Gm20498 PE=4 SV=1	2	7	1	1	3	6	1	7	0	0	0	1	0	0	0	1	54.4	7.7	7.7	20.443	182	182;106				1	1	1.3478e-57	1.6871	1.4736	NaN	1	NaN	NaN	NaN	0	NaN	NaN	NaN	0	NaN	NaN
Q8R0J2;Q9R0Q9;F6XX36;Q5F2B1;E9PVP3;F6ZGG4	Q8R0J2;Q9R0Q9;F6XX36;Q5F2B1;E9PVP3;F6ZGG4	2;2;2;2;2;1	2;2;2;2;2;1	2;2;2;2;2;1	Mannose-P-dolichol utilization defect 1 protein	Mpdu1	>tr|Q8R0J2|Q8R0J2_MOUSE Mannose-P-dolichol utilization defect 1 OS=Mus musculus GN=Mpdu1 PE=2 SV=1;>sp|Q9R0Q9|MPU1_MOUSE Mannose-P-dolichol utilization defect 1 protein OS=Mus musculus GN=Mpdu1 PE=2 SV=1;>tr|F6XX36|F6XX36_MOUSE Mannose-P-dolichol utilizati	6	2	2	2	1	0	2	1	1	0	2	1	1	0	2	1	10.1	10.1	10.1	26.438	247	247;247;197;149;120;129	3		4	1	8	1.2465e-06	0.81382	0.85455	25.675	8	0.81664	1.2243	3.6832	3	NaN	NaN	NaN	0	0.79329	0.7743
P70429;E9PVP4;F8WJB9;P70429-2	P70429;E9PVP4;F8WJB9;P70429-2	2;2;2;2	2;2;2;2	2;2;2;2	Ena/VASP-like protein	Evl	>sp|P70429|EVL_MOUSE Ena/VASP-like protein OS=Mus musculus GN=Evl PE=1 SV=2;>tr|E9PVP4|E9PVP4_MOUSE Ena/VASP-like protein OS=Mus musculus GN=Evl PE=4 SV=1;>tr|F8WJB9|F8WJB9_MOUSE Ena/VASP-like protein OS=Mus musculus GN=Evl PE=4 SV=1;>sp|P70429-2|EVL_MOUSE	4	2	2	2	1	0	2	1	1	0	2	1	1	0	2	1	7	7	7	44.337	414	414;401;399;393	1		2	4	7	2.2623e-06	1.5401	1.5305	NaN	1	NaN	NaN	NaN	0	NaN	NaN	NaN	0	1.5401	1.5305
E9Q174;E9PVU0;E9Q3L1;E9Q175	E9Q174;E9PVU0;E9Q3L1;E9Q175	6;6;6;6	6;6;6;6	2;2;2;2		Myo6	>tr|E9Q174|E9Q174_MOUSE Unconventional myosin-VI OS=Mus musculus GN=Myo6 PE=4 SV=1;>tr|E9PVU0|E9PVU0_MOUSE Unconventional myosin-VI OS=Mus musculus GN=Myo6 PE=4 SV=1;>tr|E9Q3L1|E9Q3L1_MOUSE Unconventional myosin-VI OS=Mus musculus GN=Myo6 PE=4 SV=1;>tr|E9Q	4	6	6	2	3	1	1	2	3	1	1	2	1	0	1	0	5.9	5.9	2.3	148.14	1284	1284;1266;1262;1253	5	1	2	2	10	1.4988e-13	0.76338	0.98886	27.758	7	0.77583	1.0774	9.0832	5	NaN	NaN	NaN	0	0.63857	0.62214
E9PVX6	E9PVX6	23	23	23		Mki67	>tr|E9PVX6|E9PVX6_MOUSE Protein Mki67 OS=Mus musculus GN=Mki67 PE=4 SV=1	1	23	23	23	16	15	20	12	16	15	20	12	16	15	20	12	9.2	9.2	9.2	350.86	3177	3177	96	45	72	45	258	2.0889e-159	0.44956	0.67441	48.257	13	0.44412	0.6709	5.0901	4	0.46101	0.65738	15.216	3	1.7023	1.5178
Q9JMD0;E9PW12;Q99LA2;Q8CCB2;B1AQG7	Q9JMD0;E9PW12;Q99LA2;Q8CCB2;B1AQG7	6;6;6;3;3	6;6;6;3;3	6;6;6;3;3		Zfp207	>tr|Q9JMD0|Q9JMD0_MOUSE Protein Zfp207 OS=Mus musculus GN=Zfp207 PE=2 SV=1;>tr|E9PW12|E9PW12_MOUSE Protein Zfp207 OS=Mus musculus GN=Zfp207 PE=4 SV=1;>tr|Q99LA2|Q99LA2_MOUSE Protein Zfp207 OS=Mus musculus GN=Zfp207 PE=2 SV=1;>tr|Q8CCB2|Q8CCB2_MOUSE Protein	5	6	6	6	4	3	6	4	4	3	6	4	4	3	6	4	13.9	13.9	13.9	52.792	495	495;479;464;329;227	8	6	21	8	43	2.5842e-51	1.248	1.1463	45.67	42	0.419	0.63398	8.5866	8	0.46878	0.64498	11.178	6	1.2677	1.1615
Q80U70;E9PW15	Q80U70;E9PW15	1;1	1;1	1;1	Polycomb protein Suz12	Suz12	>sp|Q80U70|SUZ12_MOUSE Polycomb protein Suz12 OS=Mus musculus GN=Suz12 PE=1 SV=2;>tr|E9PW15|E9PW15_MOUSE Polycomb protein Suz12 OS=Mus musculus GN=Suz12 PE=4 SV=1	2	1	1	1	0	1	0	0	0	1	0	0	0	1	0	0	2.4	2.4	2.4	83.025	741	741;718		1			1	3.1273e-05	NaN	NaN	NaN	0	NaN	NaN	NaN	0	NaN	NaN	NaN	0	NaN	NaN
E9PW39;D3YVL0;P23249;D3YYR1	E9PW39;D3YVL0;P23249	47;46;46;5	47;46;46;5	47;46;46;5	Putative helicase MOV-10	Mov10	>tr|E9PW39|E9PW39_MOUSE Putative helicase MOV-10 OS=Mus musculus GN=Mov10 PE=4 SV=1;>tr|D3YVL0|D3YVL0_MOUSE Putative helicase MOV-10 OS=Mus musculus GN=Mov10 PE=4 SV=1;>sp|P23249|MOV10_MOUSE Putative helicase MOV-10 OS=Mus musculus GN=Mov10 PE=1 SV=2	4	47	47	47	18	7	35	34	18	7	35	34	18	7	35	34	49.8	49.8	49.8	120.97	1077	1077;1004;1004;155	44	17	65	57	183	2.3398e-264	1.9131	1.771	71.459	153	0.30336	0.43216	33.482	39	0.34571	0.45438	25.671	8	2.1683	2.0442
E9PW43	E9PW43	3	1	1		Gm10320	>tr|E9PW43|E9PW43_MOUSE Protein Gm10320 OS=Mus musculus GN=Gm10320 PE=4 SV=1	1	3	1	1	2	2	1	2	1	0	0	0	1	0	0	0	29.2	10.6	10.6	11.788	113	113	1				1	2.9196e-12	1.2211	1.6627	NaN	1	1.2211	1.6627	NaN	1	NaN	NaN	NaN	0	NaN	NaN
E9PWB2;E9Q3W1;Q8BK63;E9Q4G7;H7BXB1;F6YBC9	E9PWB2;E9Q3W1;Q8BK63;E9Q4G7;H7BXB1	10;10;10;10;9;4	10;10;10;10;9;4	1;1;1;1;0;1	Casein kinase I isoform alpha	Csnk1a1	>tr|E9PWB2|E9PWB2_MOUSE Casein kinase I isoform alpha OS=Mus musculus GN=Csnk1a1 PE=3 SV=1;>tr|E9Q3W1|E9Q3W1_MOUSE Casein kinase I isoform alpha OS=Mus musculus GN=Csnk1a1 PE=3 SV=1;>sp|Q8BK63|KC1A_MOUSE Casein kinase I isoform alpha OS=Mus musculus GN=Csn	6	10	10	1	9	4	9	5	9	4	9	5	1	1	1	1	34	34	5.6	43.402	374	374;365;337;336;334;159	17	8	23	10	58	1.1893e-188	0.99433	1.0382	28.721	57	0.5518	0.82784	15.482	17	0.64277	0.79699	12.124	8	1.3093	1.2556
E9PWB4;P53564-5	E9PWB4;P53564-5	3;3	1;1	1;1		Cux1	>tr|E9PWB4|E9PWB4_MOUSE Homeobox protein cut-like 1 OS=Mus musculus GN=Cux1 PE=3 SV=1;>sp|P53564-5|CUX1_MOUSE Isoform 6 of Homeobox protein cut-like 1 OS=Mus musculus GN=Cux1	2	3	1	1	1	1	1	0	0	0	1	0	0	0	1	0	9.3	1.7	1.7	49.036	460	460;460			1		1	3.4578e-06	NaN	NaN	NaN	0	NaN	NaN	NaN	0	NaN	NaN	NaN	0	NaN	NaN
Q61183;E9PZR3;E9PWC8;E9QAN2;Q61183-3;Q61183-4;Q61183-2;E9QAY4;A1L349;Q9WVP6;F6VTN8;F7CXD5;E9PVN7;E9Q5Z1;F7DC29	Q61183;E9PZR3;E9PWC8;E9QAN2;Q61183-3;Q61183-4;Q61183-2	14;14;14;13;11;11;11;6;5;5;5;4;4;3;1	14;14;14;13;11;11;11;6;5;5;5;4;4;3;1	11;11;11;10;8;8;8;4;3;3;5;4;3;3;0	Poly(A) polymerase alpha	Papola	>sp|Q61183|PAPOA_MOUSE Poly(A) polymerase alpha OS=Mus musculus GN=Papola PE=1 SV=4;>tr|E9PZR3|E9PZR3_MOUSE Poly(A) polymerase alpha OS=Mus musculus GN=Papola PE=4 SV=1;>tr|E9PWC8|E9PWC8_MOUSE Poly(A) polymerase alpha OS=Mus musculus GN=Papola PE=4 SV=1;>t	15	14	14	11	6	2	8	2	6	2	8	2	6	2	5	2	27.5	27.5	23.8	82.308	739	739;718;693;732;681;657;375;168;642;641;419;322;111;66;95	10	3	10	2	25	5.7239e-58	0.54895	0.77091	83.179	20	0.31434	0.4221	25.066	10	0.54752	0.73041	NaN	1	2.4213	2.3635
E9PWE8;Q62188;Q3TT92;D3YUS0;D3Z567	E9PWE8;Q62188;Q3TT92	36;29;29;11;5	36;29;29;11;5	31;24;24;8;5	Dihydropyrimidinase-related protein 3	Dpysl3	>tr|E9PWE8|E9PWE8_MOUSE Dihydropyrimidinase-related protein 3 OS=Mus musculus GN=Dpysl3 PE=4 SV=1;>sp|Q62188|DPYL3_MOUSE Dihydropyrimidinase-related protein 3 OS=Mus musculus GN=Dpysl3 PE=1 SV=1;>tr|Q3TT92|Q3TT92_MOUSE Dihydropyrimidinase-related protein 3	5	36	36	31	29	24	33	30	29	24	33	30	24	21	28	25	74.7	74.7	66.2	73.884	683	683;570;568;216;103	175	97	174	127	573	0	1.0357	1.0074	16.521	401	0.60766	0.93171	16.683	117	0.62919	0.88667	17.16	60	1.171	1.0374
E9PWG2;E9PY51	E9PWG2;E9PY51	15;9	15;9	15;9		Trappc8	>tr|E9PWG2|E9PWG2_MOUSE Protein Trappc8 OS=Mus musculus GN=Trappc8 PE=4 SV=1;>tr|E9PY51|E9PY51_MOUSE Protein Trappc8 OS=Mus musculus GN=Trappc8 PE=4 SV=1	2	15	15	15	2	8	10	7	2	8	10	7	2	8	10	7	14.5	14.5	14.5	160.91	1437	1437;822	5	12	16	13	46	1.8297e-39	0.8254	0.89593	18.637	31	0.64798	0.87404	NaN	1	0.79091	1.0238	24.366	10	0.84469	0.86411
E9PWG6	E9PWG6	38	38	38		Ncapg	>tr|E9PWG6|E9PWG6_MOUSE Protein Ncapg OS=Mus musculus GN=Ncapg PE=4 SV=1	1	38	38	38	28	27	25	17	28	27	25	17	28	27	25	17	55.8	55.8	55.8	112.87	1004	1004	57	43	59	37	196	0	0.9867	1.1172	41.279	187	0.46108	0.64299	17.638	53	0.4975	0.65891	29.958	42	1.4346	1.4745
E9PWI3;G3UW40	E9PWI3;G3UW40	3;3	3;3	3;3		Mcc	>tr|E9PWI3|E9PWI3_MOUSE Protein Mcc OS=Mus musculus GN=Mcc PE=4 SV=1;>tr|G3UW40|G3UW40_MOUSE MCG4620, isoform CRA_b OS=Mus musculus GN=Mcc PE=4 SV=1	2	3	3	3	1	2	1	3	1	2	1	3	1	2	1	3	4.3	4.3	4.3	111.99	1003	1003;828	4	7	4	4	19	3.3821e-131	NaN	NaN	NaN	0	NaN	NaN	NaN	0	NaN	NaN	NaN	0	NaN	NaN
E9PWJ7;E9QAF2	E9PWJ7;E9QAF2	1;1	1;1	1;1		Abca16	>tr|E9PWJ7|E9PWJ7_MOUSE Protein Abca16 OS=Mus musculus GN=Abca16 PE=4 SV=1;>tr|E9QAF2|E9QAF2_MOUSE Protein Abca16 OS=Mus musculus GN=Abca16 PE=4 SV=1	2	1	1	1	0	1	0	0	0	1	0	0	0	1	0	0	0.9	0.9	0.9	192.27	1678	1678;1677		1			1	0.0052749	NaN	NaN	NaN	0	NaN	NaN	NaN	0	NaN	NaN	NaN	0	NaN	NaN
Q8C8K1;P54761;E9PWK7	Q8C8K1;P54761;E9PWK7	9;9;9	7;7;7	4;4;4	Ephrin type-B receptor 4	Ephb4	>tr|Q8C8K1|Q8C8K1_MOUSE Ephrin type-B receptor 4 OS=Mus musculus GN=Ephb4 PE=2 SV=1;>sp|P54761|EPHB4_MOUSE Ephrin type-B receptor 4 OS=Mus musculus GN=Ephb4 PE=1 SV=2;>tr|E9PWK7|E9PWK7_MOUSE Ephrin type-B receptor 4 OS=Mus musculus GN=Ephb4 PE=4 SV=1	3	9	7	4	7	2	5	4	6	2	3	2	3	2	1	1	11.1	9.2	4.5	109.75	996	996;987;935	11	4	7	4	26	4.2519e-47	0.86961	1.1262	65.358	16	1.3622	1.95	15.559	8	0.67385	0.82968	NaN	1	0.54952	0.5292
E9PWQ3;D3YWD1	E9PWQ3;D3YWD1	138;79	138;79	13;13		Col6a3	>tr|E9PWQ3|E9PWQ3_MOUSE Protein Col6a3 OS=Mus musculus GN=Col6a3 PE=4 SV=2;>tr|D3YWD1|D3YWD1_MOUSE Protein Col6a3 (Fragment) OS=Mus musculus GN=Col6a3 PE=4 SV=2	2	138	138	13	81	86	117	107	81	86	117	107	3	6	10	10	55.4	55.4	7.1	353.93	3284	3284;1703	179	253	385	309	1126	0	0.56343	0.63215	99.057	1105	2.8638	4.1997	34.946	178	2.6381	3.6954	28.608	246	0.48465	0.55074
E9PWT1;E9QLK7;E9PZA7;F7CGG2;Q80YV3;D3YY11	E9PWT1;E9QLK7;E9PZA7;F7CGG2;Q80YV3	43;43;43;39;26;1	43;43;43;39;26;1	43;43;43;39;26;1	Transformation/transcription domain-associated protein	Trrap	>tr|E9PWT1|E9PWT1_MOUSE Transformation/transcription domain-associated protein OS=Mus musculus GN=Trrap PE=4 SV=1;>tr|E9QLK7|E9QLK7_MOUSE Transformation/transcription domain-associated protein OS=Mus musculus GN=Trrap PE=4 SV=1;>tr|E9PZA7|E9PZA7_MOUSE Tran	6	43	43	43	6	15	35	13	6	15	35	13	6	15	35	13	15.4	15.4	15.4	437.22	3858	3858;3847;3829;3587;2565;59	11	23	48	20	102	1.472e-126	1.1701	1.2313	21.676	93	0.75583	1.1016	19.204	11	0.79445	1.0223	20.881	19	1.2773	1.3376
F6Q8A4;F6RQA2;Q505N6;P18653;E9PWV3;G3UZI3;F6UG16;E9Q6Q5;Q8C0P0-2;B1B0X1;A2CEE8	F6Q8A4;F6RQA2;Q505N6;P18653;E9PWV3;G3UZI3	8;8;8;8;8;6;2;1;1;1;1	1;1;1;1;1;1;0;0;0;0;0	1;1;1;1;1;1;0;0;0;0;0	Ribosomal protein S6 kinase;Ribosomal protein S6 kinase alpha-1	Rps6ka1	>tr|F6Q8A4|F6Q8A4_MOUSE Ribosomal protein S6 kinase (Fragment) OS=Mus musculus GN=Rps6ka1 PE=3 SV=1;>tr|F6RQA2|F6RQA2_MOUSE Ribosomal protein S6 kinase OS=Mus musculus GN=Rps6ka1 PE=3 SV=1;>tr|Q505N6|Q505N6_MOUSE Ribosomal protein S6 kinase OS=Mus musculus	11	8	1	1	7	4	6	7	1	1	1	1	1	1	1	1	11.6	2.2	2.2	83.676	741	741;736;735;724;719;625;129;658;342;203;163	5	3	7	3	18	2.1837e-29	NaN	NaN	NaN	0	NaN	NaN	NaN	0	NaN	NaN	NaN	0	NaN	NaN
E9Q4Y2;E9PWW9	E9Q4Y2;E9PWW9	11;11	11;11	11;11		Rsf1	>tr|E9Q4Y2|E9Q4Y2_MOUSE Protein Rsf1 OS=Mus musculus GN=Rsf1 PE=4 SV=1;>tr|E9PWW9|E9PWW9_MOUSE Protein Rsf1 OS=Mus musculus GN=Rsf1 PE=4 SV=1	2	11	11	11	3	5	6	8	3	5	6	8	3	5	6	8	8.6	8.6	8.6	161.75	1441	1441;1426	28	28	21	40	117	4.661e-221	1.5699	1.8522	97.151	3	NaN	NaN	NaN	0	0.44144	0.58337	NaN	1	3.9573	4.0215
Q811L6;E9QPR4;E9PWX8;E9Q1M8;Q811L6-2;E9Q4Q9;E9Q6G0;F7AIF3	Q811L6;E9QPR4;E9PWX8	11;11;11;3;3;3;3;1	10;10;10;2;2;2;2;1	10;10;10;2;2;2;2;1	Microtubule-associated serine/threonine-protein kinase 4	Mast4	>sp|Q811L6|MAST4_MOUSE Microtubule-associated serine/threonine-protein kinase 4 OS=Mus musculus GN=Mast4 PE=1 SV=3;>tr|E9QPR4|E9QPR4_MOUSE Microtubule-associated serine/threonine-protein kinase 4 OS=Mus musculus GN=Mast4 PE=4 SV=1;>tr|E9PWX8|E9PWX8_MOUSE M	8	11	10	10	6	6	6	5	5	6	6	5	5	6	6	5	4.7	4.4	4.4	284	2618	2618;2441;2426;1210;1043;993;868;212	25	14	19	15	73	8.104e-36	0.8301	1.022	3.3058	3	0.76204	1.022	NaN	1	0.8301	1.0807	NaN	1	NaN	NaN
Q8C0C7;E9PWY9;D6RIJ2	Q8C0C7;E9PWY9	20;20;3	20;20;3	20;20;3	Phenylalanine--tRNA ligase alpha subunit	Farsa	>sp|Q8C0C7|SYFA_MOUSE Phenylalanine--tRNA ligase alpha subunit OS=Mus musculus GN=Farsa PE=2 SV=1;>tr|E9PWY9|E9PWY9_MOUSE Phenylalanine--tRNA ligase alpha subunit OS=Mus musculus GN=Farsa PE=4 SV=1	3	20	20	20	17	12	18	13	17	12	18	13	17	12	18	13	52.8	52.8	52.8	57.598	508	508;507;105	44	26	41	33	144	0	1.0835	1.0184	25.48	130	0.51531	0.78699	12.525	41	0.53926	0.80716	11.669	22	1.3184	1.2519
Q7TT79;E9PX19;F6Q8J5	Q7TT79;E9PX19;F6Q8J5	3;3;2	3;3;2	3;3;2	Microcephalin	Mcph1	>sp|Q7TT79|MCPH1_MOUSE Microcephalin OS=Mus musculus GN=Mcph1 PE=2 SV=1;>tr|E9PX19|E9PX19_MOUSE Microcephalin OS=Mus musculus GN=Mcph1 PE=4 SV=1;>tr|F6Q8J5|F6Q8J5_MOUSE Microcephalin (Fragment) OS=Mus musculus GN=Mcph1 PE=4 SV=1	3	3	3	3	1	1	1	2	1	1	1	2	1	1	1	2	4.3	4.3	4.3	90.372	822	822;600;256	1	1	1	4	7	3.5392e-20	0.84002	0.77096	NaN	1	NaN	NaN	NaN	0	NaN	NaN	NaN	0	0.84002	0.77096
Q8K4B0;E9PX23;F8WHY8	Q8K4B0;E9PX23;F8WHY8	6;6;6	4;4;4	4;4;4	Metastasis-associated protein MTA1	Mta1	>sp|Q8K4B0|MTA1_MOUSE Metastasis-associated protein MTA1 OS=Mus musculus GN=Mta1 PE=1 SV=1;>tr|E9PX23|E9PX23_MOUSE Metastasis-associated protein MTA1 OS=Mus musculus GN=Mta1 PE=4 SV=1;>tr|F8WHY8|F8WHY8_MOUSE Metastasis-associated protein MTA1 OS=Mus muscul	3	6	4	4	3	5	5	5	3	4	3	4	3	4	3	4	9.4	7	7	80.797	715	715;703;698	52	29	37	27	145	5.0966e-127	NaN	NaN	NaN	0	NaN	NaN	NaN	0	NaN	NaN	NaN	0	NaN	NaN
E9PX29;Q91ZE6;E9PZC2	E9PX29;Q91ZE6	6;6;1	2;2;1	2;2;1		Spnb4	>tr|E9PX29|E9PX29_MOUSE Protein Spnb4 OS=Mus musculus GN=Spnb4 PE=4 SV=1;>tr|Q91ZE6|Q91ZE6_MOUSE Beta-spectrin 4 OS=Mus musculus GN=Spnb4 PE=2 SV=1	3	6	2	2	4	4	3	3	1	1	0	0	1	1	0	0	2.2	0.8	0.8	288.82	2561	2561;2555;1241	1	1			2	2.5165e-22	0.68885	1.013	NaN	1	0.68885	1.013	NaN	1	NaN	NaN	NaN	0	NaN	NaN
E9PX30;Q8BPM2;Q8BPM2-2;E9Q1T3	E9PX30;Q8BPM2;Q8BPM2-2;E9Q1T3	12;12;11;11	12;12;11;11	12;12;11;11	Mitogen-activated protein kinase kinase kinase kinase 5	Map4k5	>tr|E9PX30|E9PX30_MOUSE Mitogen-activated protein kinase kinase kinase kinase OS=Mus musculus GN=Map4k5 PE=3 SV=1;>sp|Q8BPM2|M4K5_MOUSE Mitogen-activated protein kinase kinase kinase kinase 5 OS=Mus musculus GN=Map4k5 PE=2 SV=2;>sp|Q8BPM2-2|M4K5_MOUSE Isof	4	12	12	12	4	3	10	7	4	3	10	7	4	3	10	7	19.1	19.1	19.1	94.986	847	847;847;828;780	11	12	28	19	70	9.7635e-115	1.9851	1.9283	55.816	25	0.33284	0.47401	8.8388	3	0.46092	0.59491	NaN	1	2.0275	1.9629
E9QPR5;Q8K2V1;E9PX53;Q8K2V1-2;E0CXK8;F6TLH3;F6V294;F6U5N5	E9QPR5;Q8K2V1;E9PX53;Q8K2V1-2	16;16;16;9;7;6;3;2	16;16;16;9;7;6;3;2	10;10;10;9;1;0;3;2	Serine/threonine-protein phosphatase 4 regulatory subunit 1	Ppp4r1	>tr|E9QPR5|E9QPR5_MOUSE Serine/threonine-protein phosphatase 4 regulatory subunit 1 OS=Mus musculus GN=Ppp4r1 PE=4 SV=1;>sp|Q8K2V1|PP4R1_MOUSE Serine/threonine-protein phosphatase 4 regulatory subunit 1 OS=Mus musculus GN=Ppp4r1 PE=2 SV=2;>tr|E9PX53|E9PX53	8	16	16	10	6	1	12	9	6	1	12	9	2	0	7	5	20	20	14.4	106.32	951	951;951;934;602;376;221;148;97	8	1	20	12	41	1.5603e-52	0.8375	0.84094	15.308	39	0.71167	0.96264	24.832	8	0.66493	0.84094	NaN	1	0.85184	0.82496
Q64318;H3BLP5;E9PX55	Q64318;H3BLP5;E9PX55	1;1;1	1;1;1	1;1;1	Zinc finger E-box-binding homeobox 1	Zeb1	>sp|Q64318|ZEB1_MOUSE Zinc finger E-box-binding homeobox 1 OS=Mus musculus GN=Zeb1 PE=1 SV=1;>tr|H3BLP5|H3BLP5_MOUSE Zinc finger E-box-binding homeobox 1 (Fragment) OS=Mus musculus GN=Zeb1 PE=3 SV=1;>tr|E9PX55|E9PX55_MOUSE Zinc finger E-box-binding homeobo	3	1	1	1	1	1	1	1	1	1	1	1	1	1	1	1	2.3	2.3	2.3	122.46	1117	1117;775;695	8	23	8	12	51	2.436e-22	NaN	NaN	NaN	0	NaN	NaN	NaN	0	NaN	NaN	NaN	0	NaN	NaN
E9PX59;Q69Z37;D3Z7L1	E9PX59;Q69Z37	57;56;4	57;56;4	57;56;4	Sterile alpha motif domain-containing protein 9-like	Samd9l	>tr|E9PX59|E9PX59_MOUSE Sterile alpha motif domain-containing protein 9-like OS=Mus musculus GN=Samd9l PE=4 SV=1;>sp|Q69Z37|SAM9L_MOUSE Sterile alpha motif domain-containing protein 9-like OS=Mus musculus GN=Samd9l PE=2 SV=2	3	57	57	57	28	15	39	38	28	15	39	38	28	15	39	38	45.7	45.7	45.7	182.25	1579	1579;1561;103	45	30	75	62	212	0	2.6805	2.6713	101.89	209	0.2735	0.3699	21.807	44	0.37698	0.44148	23.454	29	3.5332	3.4745
E9PX68;E9Q585;E9Q1Q0	E9PX68;E9Q585;E9Q1Q0	6;6;4	6;6;4	6;6;4		Slc4a1ap	>tr|E9PX68|E9PX68_MOUSE Protein Slc4a1ap OS=Mus musculus GN=Slc4a1ap PE=4 SV=1;>tr|E9Q585|E9Q585_MOUSE Protein Slc4a1ap OS=Mus musculus GN=Slc4a1ap PE=4 SV=1;>tr|E9Q1Q0|E9Q1Q0_MOUSE Protein Slc4a1ap OS=Mus musculus GN=Slc4a1ap PE=4 SV=1	3	6	6	6	3	1	2	2	3	1	2	2	3	1	2	2	9.3	9.3	9.3	82.886	744	744;715;534	3	1	4	8	16	4.3293e-63	1.1647	1.1224	21.515	5	0.55595	0.7985	8.2124	2	NaN	NaN	NaN	0	1.1647	1.1473
Q60847;Q60847-5;Q60847-2;E9PX70;Q60847-3;Q60847-4;J3KMS9;F6WIM8	Q60847;Q60847-5;Q60847-2;E9PX70;Q60847-3;Q60847-4;J3KMS9	103;103;103;103;61;61;61;5	103;103;103;103;61;61;61;5	103;103;103;103;61;61;61;5	Collagen alpha-1(XII) chain	Col12a1	>sp|Q60847|COCA1_MOUSE Collagen alpha-1(XII) chain OS=Mus musculus GN=Col12a1 PE=2 SV=3;>sp|Q60847-5|COCA1_MOUSE Isoform 5 of Collagen alpha-1(XII) chain OS=Mus musculus GN=Col12a1;>sp|Q60847-2|COCA1_MOUSE Isoform 2 of Collagen alpha-1(XII) chain OS=Mus mu	8	103	103	103	28	62	87	76	28	62	87	76	28	62	87	76	44.8	44.8	44.8	340.21	3120	3120;3068;3065;3064;1958;1903;1900;314	47	105	237	159	548	0	1.0364	1.1152	76.636	545	3.1731	4.7532	49.115	47	3.2392	4.5892	37.74	105	0.94198	1.0135
Q8K1A6;E9PX94	Q8K1A6;E9PX94	7;7	7;7	7;7	Coiled-coil and C2 domain-containing protein 1A	Cc2d1a	>sp|Q8K1A6|C2D1A_MOUSE Coiled-coil and C2 domain-containing protein 1A OS=Mus musculus GN=Cc2d1a PE=1 SV=2;>tr|E9PX94|E9PX94_MOUSE Coiled-coil and C2 domain-containing protein 1A OS=Mus musculus GN=Cc2d1a PE=4 SV=2	2	7	7	7	6	3	2	2	6	3	2	2	6	3	2	2	9	9	9	103.7	943	943;897	11	10	6	5	32	6.9214e-20	0.55291	0.7901	47.916	7	0.55076	0.78467	50.977	6	0.65352	0.9474	NaN	1	NaN	NaN
E9PX95	E9PX95	2	2	2		Abca17	>tr|E9PX95|E9PX95_MOUSE Protein Abca17 OS=Mus musculus GN=Abca17 PE=3 SV=1	1	2	2	2	1	0	1	1	1	0	1	1	1	0	1	1	1	1	1	196.02	1733	1733	3		3	1	7	1.9698e-05	0.93212	1.2022	12.156	6	0.7177	1.0915	3.2933	3	NaN	NaN	NaN	0	1.0703	1.3814
E9PXB7	E9PXB7	19	1	1		Nedd4l	>tr|E9PXB7|E9PXB7_MOUSE E3 ubiquitin-protein ligase NEDD4-like OS=Mus musculus GN=Nedd4l PE=4 SV=1	1	19	1	1	15	9	10	9	1	0	0	0	1	0	0	0	26.3	1.9	1.9	112.22	976	976	1				1	0	0.36993	0.52069	NaN	1	0.36993	0.52069	NaN	1	NaN	NaN	NaN	0	NaN	NaN
Q9CQ85;E9PXB9	Q9CQ85;E9PXB9	2;2	2;2	2;2	Mitochondrial import inner membrane translocase subunit Tim22	Timm22	>sp|Q9CQ85|TIM22_MOUSE Mitochondrial import inner membrane translocase subunit Tim22 OS=Mus musculus GN=Timm22 PE=2 SV=1;>tr|E9PXB9|E9PXB9_MOUSE Mitochondrial import inner membrane translocase subunit Tim22 OS=Mus musculus GN=Timm22 PE=4 SV=1	2	2	2	2	1	0	2	2	1	0	2	2	1	0	2	2	23.2	23.2	23.2	20.114	194	194;90	2		3	4	9	9.9963e-18	1.8933	1.7497	33.288	9	0.56041	0.86137	3.2739	2	NaN	NaN	NaN	0	2.0065	1.8767
E9PXE5;E9Q9X1;Q91ZU6-4;Q91ZU6;E9QL23;Q91ZU6-2;Q91ZU6-5;Q91ZU6-8	E9PXE5;E9Q9X1;Q91ZU6-4;Q91ZU6;E9QL23;Q91ZU6-2	175;174;163;163;140;130;17;3	169;169;157;157;134;124;17;3	12;12;0;0;10;0;0;0	Dystonin	Dst	>tr|E9PXE5|E9PXE5_MOUSE Dystonin OS=Mus musculus GN=Dst PE=4 SV=1;>tr|E9Q9X1|E9Q9X1_MOUSE Dystonin OS=Mus musculus GN=Dst PE=4 SV=2;>sp|Q91ZU6-4|DYST_MOUSE Isoform 4 of Dystonin OS=Mus musculus GN=Dst;>sp|Q91ZU6|DYST_MOUSE Dystonin OS=Mus musculus GN=Dst P	8	175	169	12	70	61	142	84	67	58	136	79	5	4	9	5	29.9	28.9	2.1	834.21	7393	7393;7406;7402;7389;5379;5380;2611;388	117	92	243	125	577	0	0.98091	1.0318	55.41	473	1.1776	1.7472	60.405	88	1.1923	1.5067	30.779	74	0.97027	0.96107
Q8VDQ8;Q8VDQ8-2;E9PXF5	Q8VDQ8;Q8VDQ8-2;E9PXF5	1;1;1	1;1;1	1;1;1	NAD-dependent protein deacetylase sirtuin-2	Sirt2	>sp|Q8VDQ8|SIR2_MOUSE NAD-dependent protein deacetylase sirtuin-2 OS=Mus musculus GN=Sirt2 PE=1 SV=2;>sp|Q8VDQ8-2|SIR2_MOUSE Isoform 2 of NAD-dependent protein deacetylase sirtuin-2 OS=Mus musculus GN=Sirt2;>tr|E9PXF5|E9PXF5_MOUSE NAD-dependent protein dea	3	1	1	1	1	0	1	0	1	0	1	0	1	0	1	0	6.2	6.2	6.2	43.256	389	389;352;319	3		1		4	4.886e-15	NaN	NaN	NaN	0	NaN	NaN	NaN	0	NaN	NaN	NaN	0	NaN	NaN
G3XA42;E9PXM0	G3XA42;E9PXM0	1;1	1;1	1;1		Gm17227	>tr|G3XA42|G3XA42_MOUSE MCG148135 OS=Mus musculus GN=Gm17227 PE=4 SV=1;>tr|E9PXM0|E9PXM0_MOUSE Protein Gm17227 (Fragment) OS=Mus musculus GN=Gm17227 PE=4 SV=1	2	1	1	1	1	0	0	0	1	0	0	0	1	0	0	0	23.5	23.5	23.5	5.5677	51	51;50	1				1	0.0028112	1.1371	1.483	NaN	1	1.1371	1.483	NaN	1	NaN	NaN	NaN	0	NaN	NaN
E9PXU2;Q9Z0F8	E9PXU2;Q9Z0F8	2;2	2;2	2;2	Disintegrin and metalloproteinase domain-containing protein 17	Adam17	>tr|E9PXU2|E9PXU2_MOUSE Disintegrin and metalloproteinase domain-containing protein 17 OS=Mus musculus GN=Adam17 PE=4 SV=1;>sp|Q9Z0F8|ADA17_MOUSE Disintegrin and metalloproteinase domain-containing protein 17 OS=Mus musculus GN=Adam17 PE=1 SV=3	2	2	2	2	2	2	2	2	2	2	2	2	2	2	2	2	3	3	3	95.231	846	846;827	17	17	10	14	58	5.8178e-26	NaN	NaN	NaN	0	NaN	NaN	NaN	0	NaN	NaN	NaN	0	NaN	NaN
Q9ESD7-2;E9Q423;Q9ESD7;E9PXU9;E9QL12;Q9ESD7-3	Q9ESD7-2;E9Q423;Q9ESD7;E9PXU9;E9QL12;Q9ESD7-3	4;4;4;4;4;4	3;3;3;3;3;3	3;3;3;3;3;3	Dysferlin	Dysf	>sp|Q9ESD7-2|DYSF_MOUSE Isoform 2 of Dysferlin OS=Mus musculus GN=Dysf;>tr|E9Q423|E9Q423_MOUSE Dysferlin OS=Mus musculus GN=Dysf PE=4 SV=1;>sp|Q9ESD7|DYSF_MOUSE Dysferlin OS=Mus musculus GN=Dysf PE=1 SV=3;>tr|E9PXU9|E9PXU9_MOUSE Dysferlin OS=Mus musculus G	6	4	3	3	3	3	2	3	2	2	1	2	2	2	1	2	2	1.4	1.4	239.29	2100	2100;2099;2090;2083;2082;2069	3	2	3	4	12	4.1541e-24	0.73375	0.78979	39.118	6	0.59106	0.82898	NaN	1	0.71404	0.73543	NaN	1	1.4717	1.3373
Q8C2B3-3;Q8C2B3-2;Q8C2B3-4;Q8C2B3;Q8C2B3-5;Q8C2B3-6;E9PXW1;E9PXW8;E9PZG4;E9PX62;F6VIB5;F6RY11	Q8C2B3-3;Q8C2B3-2;Q8C2B3-4;Q8C2B3;Q8C2B3-5;Q8C2B3-6;E9PXW1;E9PXW8;E9PZG4;E9PX62	9;9;9;9;9;9;9;9;9;8;3;2	9;9;9;9;9;9;9;9;9;8;3;2	9;9;9;9;9;9;9;9;9;8;3;2	Histone deacetylase 7	Hdac7	>sp|Q8C2B3-3|HDAC7_MOUSE Isoform 3 of Histone deacetylase 7 OS=Mus musculus GN=Hdac7;>sp|Q8C2B3-2|HDAC7_MOUSE Isoform 2 of Histone deacetylase 7 OS=Mus musculus GN=Hdac7;>sp|Q8C2B3-4|HDAC7_MOUSE Isoform 4 of Histone deacetylase 7 OS=Mus musculus GN=Hdac7;>	12	9	9	9	4	8	5	6	4	8	5	6	4	8	5	6	14.3	14.3	14.3	102.98	953	953;946;944;938;916;914;892;868;636;851;257;213	22	30	14	18	84	2.5052e-56	1.6022	1.5182	NaN	1	NaN	NaN	NaN	0	NaN	NaN	NaN	0	NaN	NaN
E9PXY1;A2A432;A2A432-2;J3QJX0	E9PXY1;A2A432;A2A432-2;J3QJX0	38;37;35;24	38;37;35;24	27;26;26;19	Cullin-4B	Cul4b	>tr|E9PXY1|E9PXY1_MOUSE Cullin-4B OS=Mus musculus GN=Cul4b PE=3 SV=2;>sp|A2A432|CUL4B_MOUSE Cullin-4B OS=Mus musculus GN=Cul4b PE=1 SV=1;>sp|A2A432-2|CUL4B_MOUSE Isoform 2 of Cullin-4B OS=Mus musculus GN=Cul4b;>tr|J3QJX0|J3QJX0_MOUSE Cullin-4B OS=Mus muscu	4	38	38	27	21	15	29	16	21	15	29	16	13	9	19	9	51.8	51.8	40.7	102.41	896	896;970;941;552	51	37	76	52	216	4.1267e-156	0.85181	0.86613	39.693	202	0.5454	0.74449	34.334	50	0.6019	0.8458	39.94	35	1.4253	1.3128
E9PY55;F8VQL9;E9Q701;Q9WU42;E9Q9V3;Q9WU42-2;F6Z4B2;D3Z2J5;F6SK53;F6YAU7	E9PY55;F8VQL9;E9Q701;Q9WU42;E9Q9V3;Q9WU42-2;F6Z4B2;D3Z2J5	31;30;30;30;24;24;21;16;2;1	31;30;30;30;24;24;21;16;2;1	31;30;30;30;24;24;21;16;2;1	Nuclear receptor corepressor 2	Ncor2	>tr|E9PY55|E9PY55_MOUSE Nuclear receptor corepressor 2 OS=Mus musculus GN=Ncor2 PE=4 SV=1;>tr|F8VQL9|F8VQL9_MOUSE Nuclear receptor corepressor 2 OS=Mus musculus GN=Ncor2 PE=4 SV=1;>tr|E9Q701|E9Q701_MOUSE Nuclear receptor corepressor 2 OS=Mus musculus GN=Nc	10	31	31	31	15	14	19	15	15	14	19	15	15	14	19	15	17.5	17.5	17.5	269.26	2468	2468;2507;2473;2472;2332;2253;1552;1025;215;251	76	58	79	59	272	1.6386e-286	1.8811	1.9743	83.363	35	0.21727	0.33261	59.214	9	1.0389	1.287	NaN	1	2.1956	2.3352
H3BJS0;H3BKH2;E9Q3S2;H3BK48;Q8R311;E9PY90;H3BK44;H3BJI6;H3BL19;H3BKL6;H3BJ71;H3BJS5;H3BJY7	H3BJS0;H3BKH2;E9Q3S2;H3BK48;Q8R311;E9PY90;H3BK44;H3BJI6;H3BL19;H3BKL6;H3BJ71	8;8;8;8;8;8;8;7;7;7;4;2;1	8;8;8;8;8;8;8;7;7;7;4;2;1	8;8;8;8;8;8;8;7;7;7;4;2;1	Cutaneous T-cell lymphoma-associated antigen 5 homolog	Ctage5	>tr|H3BJS0|H3BJS0_MOUSE Cutaneous T-cell lymphoma-associated antigen 5 homolog OS=Mus musculus GN=Ctage5 PE=4 SV=1;>tr|H3BKH2|H3BKH2_MOUSE Cutaneous T-cell lymphoma-associated antigen 5 homolog OS=Mus musculus GN=Ctage5 PE=4 SV=1;>tr|E9Q3S2|E9Q3S2_MOUSE Cu	13	8	8	8	7	4	4	4	7	4	4	4	7	4	4	4	14.7	14.7	14.7	90.379	805	805;796;794;785;779;772;761;753;725;701;514;269;185	25	26	9	29	89	1.1757e-75	0.56387	0.75006	36.859	9	0.50724	0.7252	7.6482	6	NaN	NaN	NaN	0	1.5691	1.549
G5E8T9;Q99KB8;Q99KB8-2;E9PYA3;E9Q2H8;D3YWI0;D3YUX8	G5E8T9;Q99KB8;Q99KB8-2;E9PYA3;E9Q2H8	5;5;5;5;4;2;1	5;5;5;5;4;2;1	5;5;5;5;4;2;1	Hydroxyacylglutathione hydrolase, mitochondrial	Hagh	>tr|G5E8T9|G5E8T9_MOUSE Hydroxyacylglutathione hydrolase OS=Mus musculus GN=Hagh PE=3 SV=1;>sp|Q99KB8|GLO2_MOUSE Hydroxyacylglutathione hydrolase, mitochondrial OS=Mus musculus GN=Hagh PE=2 SV=2;>sp|Q99KB8-2|GLO2_MOUSE Isoform 2 of Hydroxyacylglutathione h	7	5	5	5	3	2	5	3	3	2	5	3	3	2	5	3	20.7	20.7	20.7	34.103	309	309;309;260;237;217;167;132	8	3	15	8	34	2.751e-23	0.79389	0.70507	48.101	34	0.83814	1.3066	28.501	8	0.84882	1.1162	14.346	3	0.72283	0.64324
E9PYB0	E9PYB0	21	8	6		Ahnak2	>tr|E9PYB0|E9PYB0_MOUSE Protein Ahnak2 (Fragment) OS=Mus musculus GN=Ahnak2 PE=4 SV=1	1	21	8	6	15	15	19	17	6	4	8	5	4	3	6	4	52.6	7.7	4.1	182.7	1739	1739	72	41	67	57	237	0	0.92019	1.1368	27.762	15	0.75465	1.0476	38.635	4	0.50664	0.79085	21.569	2	1.1272	1.1709
E9PYD5	E9PYD5	19	1	1		Tcea1	>tr|E9PYD5|E9PYD5_MOUSE Transcription elongation factor A protein 1 OS=Mus musculus GN=Tcea1 PE=4 SV=1	1	19	1	1	12	12	15	14	0	0	1	0	0	0	1	0	70.5	13.8	13.8	35.031	312	312			1		1	0	0.67506	0.65353	NaN	1	NaN	NaN	NaN	0	NaN	NaN	NaN	0	0.67506	0.65353
E9PYF4;F6VG99;E9PYI7;F6TFN2;Q3UPW3;E0CZD8	E9PYF4;F6VG99;E9PYI7;F6TFN2	8;8;6;5;1;1	8;8;6;5;1;1	8;8;6;5;1;1		Lmo7	>tr|E9PYF4|E9PYF4_MOUSE Protein Lmo7 OS=Mus musculus GN=Lmo7 PE=4 SV=1;>tr|F6VG99|F6VG99_MOUSE Protein Lmo7 (Fragment) OS=Mus musculus GN=Lmo7 PE=4 SV=1;>tr|E9PYI7|E9PYI7_MOUSE Protein Lmo7 OS=Mus musculus GN=Lmo7 PE=4 SV=1;>tr|F6TFN2|F6TFN2_MOUSE Protein	6	8	8	8	3	2	2	3	3	2	2	3	3	2	2	3	5.1	5.1	5.1	192.55	1699	1699;1604;1453;1189;471;422	4	3	3	7	17	1.631e-15	3.5804	4.7377	135.23	6	3.9457	5.5703	NaN	1	NaN	NaN	NaN	0	15.822	15.081
E9PYG6	E9PYG6	24	24	24		Rasa1	>tr|E9PYG6|E9PYG6_MOUSE Protein Rasa1 OS=Mus musculus GN=Rasa1 PE=4 SV=1	1	24	24	24	21	14	9	6	21	14	9	6	21	14	9	6	31	31	31	115.43	1038	1038	36	27	15	11	89	8.1498e-183	0.27782	0.37571	79.083	88	0.24059	0.33853	31.248	36	0.27264	0.36248	12.468	27	2.0865	1.9193
E9PYH0;G3XA35;E9QMK2	E9PYH0;G3XA35;E9QMK2	10;8;6	10;8;6	2;2;0		Vcan	>tr|E9PYH0|E9PYH0_MOUSE Versican core protein OS=Mus musculus GN=Vcan PE=4 SV=1;>tr|G3XA35|G3XA35_MOUSE MCG116562, isoform CRA_a OS=Mus musculus GN=Vcan PE=4 SV=1;>tr|E9QMK2|E9QMK2_MOUSE Versican core protein OS=Mus musculus GN=Vcan PE=4 SV=1	3	10	10	2	4	6	4	3	4	6	4	3	1	2	1	1	5.1	5.1	0.8	366.89	3354	3354;2394;1615	72	55	57	67	251	0	0.69277	0.84797	53.867	6	NaN	NaN	NaN	0	0.66311	0.82269	27.215	3	1.1288	1.1618
E9PYH2;Q91V12;Q91V12-3	E9PYH2;Q91V12;Q91V12-3	12;12;11	1;1;0	1;1;0	Cytosolic acyl coenzyme A thioester hydrolase	Acot7	>tr|E9PYH2|E9PYH2_MOUSE Cytosolic acyl coenzyme A thioester hydrolase OS=Mus musculus GN=Acot7 PE=4 SV=1;>sp|Q91V12|BACH_MOUSE Cytosolic acyl coenzyme A thioester hydrolase OS=Mus musculus GN=Acot7 PE=1 SV=2;>sp|Q91V12-3|BACH_MOUSE Isoform C of Cytosolic a	3	12	1	1	10	7	11	7	0	0	1	0	0	0	1	0	37.2	2.3	2.3	42.826	384	384;381;350			1		1	2.6975e-122	1.3092	1.3665	NaN	1	NaN	NaN	NaN	0	NaN	NaN	NaN	0	1.3092	1.3665
E9PYH6	E9PYH6	4	4	3		Setd1a	>tr|E9PYH6|E9PYH6_MOUSE Protein Setd1a OS=Mus musculus GN=Setd1a PE=4 SV=1	1	4	4	3	2	1	2	2	2	1	2	2	1	1	2	2	4.3	4.3	3.7	186.06	1716	1716	33	20	16	28	97	1.5884e-20	0.63856	0.98	15.167	3	0.61623	0.92373	8.3638	2	NaN	NaN	NaN	0	1.1656	1.1765
Q6ZPQ6;E9PYJ7;Q6ZPQ6-2	Q6ZPQ6;E9PYJ7;Q6ZPQ6-2	3;3;3	3;3;3	3;3;3	Membrane-associated phosphatidylinositol transfer protein 2	Pitpnm2	>sp|Q6ZPQ6|PITM2_MOUSE Membrane-associated phosphatidylinositol transfer protein 2 OS=Mus musculus GN=Pitpnm2 PE=1 SV=2;>tr|E9PYJ7|E9PYJ7_MOUSE Membrane-associated phosphatidylinositol transfer protein 2 OS=Mus musculus GN=Pitpnm2 PE=4 SV=1;>sp|Q6ZPQ6-2|PI	3	3	3	3	1	3	0	1	1	3	0	1	1	3	0	1	2.2	2.2	2.2	148.03	1335	1335;1331;1281	2	7		1	10	2.2067e-07	NaN	NaN	NaN	0	NaN	NaN	NaN	0	NaN	NaN	NaN	0	NaN	NaN
E9PYK3	E9PYK3	2	2	2		Parp4	>tr|E9PYK3|E9PYK3_MOUSE Protein Parp4 OS=Mus musculus GN=Parp4 PE=4 SV=1	1	2	2	2	1	1	2	1	1	1	2	1	1	1	2	1	1.1	1.1	1.1	216.13	1969	1969	12	10	16	6	44	1.9972e-27	0.74248	0.72395	NaN	1	NaN	NaN	NaN	0	NaN	NaN	NaN	0	0.74248	0.72395
E9PYL2	E9PYL2	5	5	5		Prr12	>tr|E9PYL2|E9PYL2_MOUSE Protein Prr12 OS=Mus musculus GN=Prr12 PE=4 SV=1	1	5	5	5	2	5	2	4	2	5	2	4	2	5	2	4	3.2	3.2	3.2	211.87	2035	2035	5	19	7	9	40	6.2958e-16	0.81773	0.8481	67.475	5	1.0388	1.4188	NaN	1	0.47468	0.6673	33.906	2	NaN	NaN
E9PYQ1;Q62219-9;Q62219-10;E9Q1D5;Q62219-5;Q62219-7	E9PYQ1;Q62219-9;Q62219-10;E9Q1D5;Q62219-5;Q62219-7	11;11;11;10;10;10	1;1;1;0;0;0	1;1;1;0;0;0		Tgfb1i1	>tr|E9PYQ1|E9PYQ1_MOUSE Transforming growth factor beta-1-induced transcript 1 protein OS=Mus musculus GN=Tgfb1i1 PE=4 SV=1;>sp|Q62219-9|TGFI1_MOUSE Isoform 9 of Transforming growth factor beta-1-induced transcript 1 protein OS=Mus musculus GN=Tgfb1i1;>sp|	6	11	1	1	7	6	8	8	1	0	1	0	1	0	1	0	41.9	4.5	4.5	43.771	399	399;399;351;422;402;350	1		1		2	1.4338e-275	NaN	NaN	NaN	0	NaN	NaN	NaN	0	NaN	NaN	NaN	0	NaN	NaN
E9PYT0;P97393	E9PYT0;P97393	25;23	25;23	25;23	Rho GTPase-activating protein 5	Arhgap5	>tr|E9PYT0|E9PYT0_MOUSE Rho GTPase-activating protein 5 OS=Mus musculus GN=Arhgap5 PE=4 SV=1;>sp|P97393|RHG05_MOUSE Rho GTPase-activating protein 5 OS=Mus musculus GN=Arhgap5 PE=2 SV=2	2	25	25	25	13	5	19	10	13	5	19	10	13	5	19	10	21.6	21.6	21.6	172.47	1503	1503;1501	25	16	36	27	104	2.3621e-177	1.6399	1.5885	57.831	45	0.40085	0.50449	33.5	10	0.35662	0.3852	4.8982	3	1.7972	1.6745
E9PYU1	E9PYU1	1	1	1		Coro7	>tr|E9PYU1|E9PYU1_MOUSE Coronin OS=Mus musculus GN=Coro7 PE=3 SV=1	1	1	1	1	0	1	0	0	0	1	0	0	0	1	0	0	8.4	8.4	8.4	32.754	298	298		1			1	0.0019185	NaN	NaN	NaN	0	NaN	NaN	NaN	0	NaN	NaN	NaN	0	NaN	NaN
E9PYZ7	E9PYZ7	14	1	1		Rbm26	>tr|E9PYZ7|E9PYZ7_MOUSE RNA-binding protein 26 OS=Mus musculus GN=Rbm26 PE=4 SV=1	1	14	1	1	3	7	10	7	0	1	0	1	0	1	0	1	17.4	2.5	2.5	113.8	1009	1009		4		1	5	1.6647e-54	NaN	NaN	NaN	0	NaN	NaN	NaN	0	NaN	NaN	NaN	0	NaN	NaN
Q8BFQ1;E9PZ00;J3QPG5;Q61207;K3W4L3	Q8BFQ1;E9PZ00;J3QPG5;Q61207;K3W4L3	21;21;20;20;20	21;21;20;20;20	21;21;20;20;20	Sulfated glycoprotein 1	Psap	>tr|Q8BFQ1|Q8BFQ1_MOUSE Prosaposin, isoform CRA_a OS=Mus musculus GN=Psap PE=2 SV=1;>tr|E9PZ00|E9PZ00_MOUSE Sulfated glycoprotein 1 OS=Mus musculus GN=Psap PE=4 SV=1;>tr|J3QPG5|J3QPG5_MOUSE Sulfated glycoprotein 1 OS=Mus musculus GN=Psap PE=4 SV=1;>sp|Q612	5	21	21	21	11	13	15	15	11	13	15	15	11	13	15	15	46.6	46.6	46.6	61.05	554	554;551;557;557;556	22	38	32	56	148	2.3285e-149	1.0262	0.98188	53.527	145	1.1987	1.6976	20.799	21	1.2864	1.8352	28.643	36	0.99777	0.92038
E9PZ16;B1B0C7	E9PZ16;B1B0C7	74;73	74;73	10;9		Hspg2	>tr|E9PZ16|E9PZ16_MOUSE Basement membrane-specific heparan sulfate proteoglycan core protein OS=Mus musculus GN=Hspg2 PE=4 SV=1;>tr|B1B0C7|B1B0C7_MOUSE Basement membrane-specific heparan sulfate proteoglycan core protein OS=Mus musculus GN=Hspg2 PE=4 SV=1	2	74	74	10	20	21	64	41	20	21	64	41	4	1	8	6	24.9	24.9	4.2	469.78	4383	4383;4375	35	34	121	67	257	0	1.0538	0.97838	28.26	246	1.0934	1.5913	18.787	33	1.1492	1.3393	16.15	33	1.0452	0.89084
E9PZ21;Q91W59;Q91W59-3;Q91W59-2;Q8BWL5;Q8BWL5-2;Q8BWL5-3;Q8BWL5-6;Q8BWL5-4;G3UZJ9	E9PZ21;Q91W59;Q91W59-3;Q91W59-2;Q8BWL5;Q8BWL5-2;Q8BWL5-3;Q8BWL5-6;Q8BWL5-4;G3UZJ9	4;4;4;4;2;2;2;2;2;2	3;3;3;3;1;1;1;1;1;1	2;2;2;2;0;0;0;0;0;0	RNA-binding motif, single-stranded-interacting protein 1;RNA-binding motif, single-stranded-interacting protein 3	Rbms1;Rbms3	>tr|E9PZ21|E9PZ21_MOUSE RNA-binding motif, single-stranded-interacting protein 1 OS=Mus musculus GN=Rbms1 PE=4 SV=1;>sp|Q91W59|RBMS1_MOUSE RNA-binding motif, single-stranded-interacting protein 1 OS=Mus musculus GN=Rbms1 PE=2 SV=1;>sp|Q91W59-3|RBMS1_MOUSE	10	4	3	2	2	1	3	3	1	0	2	2	0	0	1	1	11.5	9.8	6.2	45.02	417	417;403;386;370;431;415;414;402;386;206	2		5	2	9	4.6022e-108	1.1501	1.3218	50.868	9	1.1067	1.5479	4.5958	2	NaN	NaN	NaN	0	1.34	1.3218
E9PZ26;G5E8P1;E9Q412	E9PZ26;G5E8P1;E9Q412	4;3;2	4;3;2	4;3;2		Brd1	>tr|E9PZ26|E9PZ26_MOUSE Protein Brd1 OS=Mus musculus GN=Brd1 PE=4 SV=1;>tr|G5E8P1|G5E8P1_MOUSE MCG7283 OS=Mus musculus GN=Brd1 PE=4 SV=1;>tr|E9Q412|E9Q412_MOUSE Protein Brd1 OS=Mus musculus GN=Brd1 PE=4 SV=1	3	4	4	4	3	3	3	3	3	3	3	3	3	3	3	3	4	4	4	133.37	1189	1189;1058;867	8	8	6	4	26	2.6958e-132	NaN	NaN	NaN	0	NaN	NaN	NaN	0	NaN	NaN	NaN	0	NaN	NaN
Q08874;Q3U2D2;E9QL92;Q08874-4;E9PZ28;Q08874-2;Q08874-7;Q08874-3;Q08874-8;Q08874-9;Q08874-5;Q08874-6	Q08874;Q3U2D2;E9QL92;Q08874-4;E9PZ28;Q08874-2;Q08874-7;Q08874-3;Q08874-8;Q08874-9;Q08874-5;Q08874-6	1;1;1;1;1;1;1;1;1;1;1;1	1;1;1;1;1;1;1;1;1;1;1;1	1;1;1;1;1;1;1;1;1;1;1;1	Microphthalmia-associated transcription factor	Mitf	>sp|Q08874|MITF_MOUSE Microphthalmia-associated transcription factor OS=Mus musculus GN=Mitf PE=1 SV=3;>tr|Q3U2D2|Q3U2D2_MOUSE Microphthalmia-associated transcription factor OS=Mus musculus GN=Mitf PE=2 SV=1;>tr|E9QL92|E9QL92_MOUSE Microphthalmia-associate	12	1	1	1	0	1	0	0	0	1	0	0	0	1	0	0	3.8	3.8	3.8	58.627	526	526;526;510;510;501;470;454;419;419;413;374;349		2			2	4.5639e-08	NaN	NaN	NaN	0	NaN	NaN	NaN	0	NaN	NaN	NaN	0	NaN	NaN
E9PZ50;F2Z429;P61407	E9PZ50;F2Z429;P61407	3;3;3	3;3;3	3;3;3	Tudor domain-containing protein 6	Tdrd6	>tr|E9PZ50|E9PZ50_MOUSE Tudor domain-containing protein 6 OS=Mus musculus GN=Tdrd6 PE=4 SV=1;>tr|F2Z429|F2Z429_MOUSE Tudor domain-containing protein 6 OS=Mus musculus GN=Tdrd6 PE=4 SV=1;>sp|P61407|TDRD6_MOUSE Tudor domain-containing protein 6 OS=Mus muscul	3	3	3	3	1	1	2	1	1	1	2	1	1	1	2	1	1.5	1.5	1.5	238.08	2135	2135;2134;2134	3	1	3	2	9	2.66e-06	1.4364	1.3749	12.952	3	NaN	NaN	NaN	0	NaN	NaN	NaN	0	1.4364	1.3749
E9PZ54	E9PZ54	2	1	0		Gcom1	>tr|E9PZ54|E9PZ54_MOUSE Protein Gcom1 OS=Mus musculus GN=Gcom1 PE=4 SV=1	1	2	1	0	0	1	2	1	0	0	1	0	0	0	0	0	5.5	2.9	0	63.506	550	550			1		1	4.6947e-06	NaN	NaN	NaN	0	NaN	NaN	NaN	0	NaN	NaN	NaN	0	NaN	NaN
Q61122;E9PZ64	Q61122;E9PZ64	2;2	1;1	1;1	NGFI-A-binding protein 1	Nab1	>sp|Q61122|NAB1_MOUSE NGFI-A-binding protein 1 OS=Mus musculus GN=Nab1 PE=1 SV=2;>tr|E9PZ64|E9PZ64_MOUSE NGFI-A-binding protein 1 OS=Mus musculus GN=Nab1 PE=4 SV=1	2	2	1	1	0	2	1	1	0	1	0	0	0	1	0	0	7.2	5.3	5.3	54.009	486	486;456		2			2	3.2958e-10	NaN	NaN	NaN	0	NaN	NaN	NaN	0	NaN	NaN	NaN	0	NaN	NaN
[truncated: 5,610 more rows]
[truncated: 39 more columns]
