# Supplementary material for: Phosphoproteomics reveals network rewiring to a pro-adhesion state in annexin-1-deficient mammary epithelial cells
Source: Breast Cancer Res. 2017 Dec 12;19:132. doi: 10.1186/s13058-017-0924-4 (PMC5727667; doi:10.1186/s13058-017-0924-4)
Supplement: Supplementary file 7 — Site-specific functions of ANXA1-regulated phosphorylation sites. (XLSX 23 kb) [file 13058_2017_924_MOESM7_ESM.xlsx]

## Sheet: Sheet1
Table S4: Site-specific functions of ANXA1-regulated phosphorylation sites
ANXA1-responsive Upregulated Sites
Gene Name	Site	Upstream Kinase	Functional consequence
Add1	S12	CDK1	Increases during G2/M phase. Necessary for interaction with mitotic spindle through Myo10
Ahnak	T5567	ERK2
Appl1	S403	PKA	Inhibits interaction with inositol polyphosphate 5 phosphatase 1 (OCRL1)
Appl1	S401		Mediates crosstalk between insulin and adeponectin pathways. Improves insulin sensitivity.Important for binding with IR beta and dissociation with IRS proteins
Arhgap29	S1040	mTOR
Cby1	S20	AKT1/2	Inhibitor of the Wnt signaling pathway. Phosphorylation allows 14-3-3 binding and b-catenin sequestration in the cytoplasm
Cdk1	Y15	Wee1	Inhibitory phosphorylation. Dephosphorylation required for progession into mitosis
Crtc3	S62	QSK;SIK;QIK
Efhd2	S74	CDK5/CDK1	Affects calcium binding activity
Efhd2	S76	CDK1
Gem	S22		Binds 14-3-3
Gem	S300		Binds 14-3-3-important for stability and inhibition of Rhokinase mediated cytoskeletal reorganization such as stress fibers
Gpsm2	S408	PKCA	Spind pole orientation
Hmgcr	S871		Rate limiting enzyme in cholestrol synthesis. Phosphorylation inhibits enzymatic activity
Ksr1	S320	ERK1	Feedback regulation of ERK1 at later time points
Lrp6	T1493	CK1	Sequential phosphorylation followed by GSK3 phosphorylation of another site. Required for recruitment to Axin Wnt signaling pathway
Lrp6	S1490	JNK1/MAPK11/ERK1	Coactivation of wnt signaling
Ncam1	S774		Important for activation of CREB and NCAM mediated signal transduction
Ndrg1	S330	SGK1	Supresses chemokine expression and supresses NFkb signaling
Pdha1	S300	PDHK3	Inhibits enzymatic activity
Pdha1	S293	PDHK2	Inhibits enzymatic activity
Pdha1	S232	PDHK1	Inhibits enzymatic activity
Ppp2r5d	S81	PKA
Rps6ka3	S369	ERK1/PDK1	Feedback regulation of ERK2. Enzymatic activity, induced
Sept5	S327	CDK5	Decreased binding to syntaxin1
Slc12a2	T206	SPAK	Functional site. Induced on forskolin treatment
Slc12a2	T211		Functional site. PKCd acts upstream of SPAK
Stat5a	S779	PAK1/PAK2/ERBB4/CDK8	Activity, induced. Required for nuclear translocation. Stablizes interaction with ERBB4.
Stat5a	S128	ERBB4	Transcription, induced. Required for ERBB4 induced phosphorylation of Y694 and subsequent DNA binding
Stim1	S575	ERK1/ERK2	Calcium mobilization and EB1-dependent STIM1 multimerization. Regulate store operated calcium entry (SOCE). Netrin-2-mediated NFATc3 activation is mediated by interaction between Cdo and ERK mediated S575 at Stim1.
Stmn1	S16	PAK/PKA/CAMK2A	Inhibits microtubule destabilizing activity
Trpc6	S814	PKC
ANXA1-responsive Downregulated Sites
Cdk18	S109	PKA
Dnm1	S770	CDK5/GSK3	activity dependent bulk endocytosis
Dync1li1	S516	ERK2
Eef2	T57	CHAK1/GSK3/GSK3B	Inhibits phosphorylation
Eif3h	S183		Oncogenic potential. Increased translation and maintenance of malignant state in cells. Rapamycin inhibited phosphorylation
Epha2	S898	AKT
F11r	S285	aPKC	Maturation of immatute cell-cell contacts, required for tight junction formation
Irs2	S573	PI3k/AKT	Binds to 14-3-3. Negative impact on downstream AKT signaling
Pdlim4	S119	PKA	Cell growth, inhibited
Rps6ka1	S369	Rps6ka1	ERK phosphorylates at T573 in the activation loop of the CTD. CTD autophosphorylates at S380 critical for maximum activity and also for creating docking site that recruits PDK1
Sik3	S674		cAMP induced 14-3-3 binding and cytosolic retention. Interactions affected
Sqstm1	T272		cell cycle regulation
Trp53	S312	AurA/CDK1/CDK2/CDK9	Site dispensable. Activity induced/inhibited
Trp53	S310	CDK2
Vim	S39	ROCK1/RAC1/AKT1/PAK1/PKA/Aurb	cell motility increased and protein stabilized
Yap1	T104	ckd1	promotes migration and essential for neoplastic transformation. Phosphorylates activated YAP1
Yap1	S112	Akt/LATS1/S2/MST2	Binds to 14-3-3. Sequestered in cytoplasm. Inactivates YAP
