# Supplementary material for: Phosphoproteomics reveals network rewiring to a pro-adhesion state in annexin-1-deficient mammary epithelial cells
Source: Breast Cancer Res. 2017 Dec 12;19:132. doi: 10.1186/s13058-017-0924-4 (PMC5727667; doi:10.1186/s13058-017-0924-4)
Supplement: Supplementary file 8 — Cellular component enrichment of ANXA1-modulated phosphoproteins. (XLSX 10 kb) [file 13058_2017_924_MOESM8_ESM.xlsx]

## Sheet: Sheet1
Table S5: Cellular component enrichment of ANXA1-modulated phosphoproteins
ANXA1-responsive Upregulated Sites
Term	Count	P-Value	Fold Enrichment	Benjamini corrected p value
cytoplasm	124	5.9e-15	1.8	1.6e-12
cell-cell adherens junction	21	1.2e-10	6.4	1.6e-08
cytoskeleton	37	1e-09	3.2	9.2e-08
actin cytoskeleton	16	3e-09	7.6	2e-07
focal adhesion	20	2.8e-08	4.9	1.5e-06
cell junction	26	1.2e-07	3.5	5.4e-06
dendritic spine	10	2.5e-05	6.5	0.00094
stress fiber	7	6.8e-05	10	0.0023
nucleoplasm	38	0.00019	1.9	0.0055
postsynaptic density	10	0.0009	4	0.024
ruffle membrane	6	0.0014	7.3	0.033
microtubule	11	0.0023	3.2	0.049
synapse	14	0.0024	2.7	0.049
nucleus	82	0.0034	1.3	0.063
cell cortex	7	0.004	4.7	0.068
podosome	4	0.0044	12	0.07
membrane	92	0.0047	1.3	0.071
cell-cell junction	8	0.0051	3.8	0.073
microtubule cytoskeleton	7	0.0062	4.2	0.083
endosome membrane	6	0.0089	4.7	0.11
Z disc	6	0.0095	4.6	0.11
recycling endosome membrane	4	0.01	8.9	0.11
cytosol	30	0.01	1.6	0.11
ANXA1-responsive Downregulated Sites
Term	Count	P-Value	Fold Enrichment	Benjamini corrected p value
cytoplasm	102	1.2e-22	2.2	3.1e-20
cytoskeleton	32	1.6e-11	4.2	2e-09
protein complex	17	6.6e-06	3.9	0.00056
cell projection	18	7.8e-06	3.7	0.0005
cell-cell adherens junction	12	1.2e-05	5.5	0.0006
focal adhesion	13	1.7e-05	4.8	0.0007
nucleus	65	3e-05	1.6	0.0011
microtubule	11	8.9e-05	4.9	0.0028
cell junction	16	0.00013	3.2	0.0035
kinesin II complex	3	0.00014	144.6	0.0035
cytosol	27	0.00018	2.2	0.0041
intraciliary transport particle	3	0.00028	108.4	0.0059
microtubule cytoskeleton	7	0.00078	6.4	0.015
centrosome	11	0.00085	3.7	0.015
lamellipodium	7	0.00095	6.2	0.016
aggresome	4	0.0014	18.1	0.021
nucleoplasm	26	0.0014	1.9	0.021
bicellular tight junction	6	0.0021	6.6	0.029
cell-cell junction	7	0.0027	5	0.035
nucleolus	14	0.0053	2.4	0.065
ciliary basal body	5	0.0068	6.6	0.079
