# Supplementary material for: Phosphoproteomics reveals network rewiring to a pro-adhesion state in annexin-1-deficient mammary epithelial cells
Source: Breast Cancer Res. 2017 Dec 12;19:132. doi: 10.1186/s13058-017-0924-4 (PMC5727667; doi:10.1186/s13058-017-0924-4)
Supplement: Supplementary file 10 — List of all ANXA1-regulated proteins in mammary epithelial cells from ANXA1-heterozygous and ANXA1-deficient mice. (XLSX 819 kb) [file 13058_2017_924_MOESM10_ESM.xlsx]

## Sheet: Sheet1
Table S6: List of all ANXA1-regulated proteins in mammary epithelial cells from ANXA1-heterozygous and ANXA1-deficient mice
Protein IDs	Majority protein IDs	Protein names	Gene names	Robust Z score Fwd1	Robust Z score Fwd2	Robust Z score Rev1	Robust Z score Rev2	Protein Status	Log2 Fwd1	Log2 Fwd2	Log2 Rev1	Log2 Rev2	PEP	Ratio H/L count Fwd1	Ratio H/L count Fwd2	Ratio H/L count Rev1	Ratio H/L count Rev2
A0JNY3;Q8BUV3	A0JNY3;Q8BUV3	Gephyrin;Molybdopterin adenylyltransferase;Molybdopterin molybdenumtransferase	Gphn	-2.96633	#VALUE!	-1.68745	-2.22595		-1.45154	NaN	0.676809	0.861558	7.4087e-29	2	0	5	5
Q91ZF0;A2A4A1;F7CGC9	Q91ZF0;A2A4A1;F7CGC9	DnaJ homolog subfamily C member 24	Dnajc24	-1.92189	-1.28057	-1.90322	-1.59136		-0.937519	-0.566357	0.762816	0.6219	9.6881e-48	2	3	8	5
Q62077;A2A4A6;G3UXP4;F6SLL0	Q62077;A2A4A6	1-phosphatidylinositol 4,5-bisphosphate phosphodiesterase gamma-1	Plcg1	-2.03492	-2.38444	-2.06568	-2.3011		-0.993149	-1.05959	0.827575	0.889941	1.9269e-161	22	27	31	10
P84099;A2A547	P84099;A2A547	60S ribosomal protein L19;Ribosomal protein L19	Rpl19	-0.288362	-0.577731	-0.374074	-0.212721		-0.133575	-0.252312	0.153287	0.101247	0	60	49	43	56
A2A5R2;F6YCJ0	A2A5R2		Arfgef2	-0.750482	-1.33141	-0.924317	-1.06693		-0.361009	-0.589073	0.372618	0.423847	0	33	21	58	26
A2A5S3;Q9DBE7;Q9Z108;A2A5R8;Q8CJ67;Q8CJ67-2;D3Z6D2;Q8CJ67-3;E2QRQ3	A2A5S3;Q9DBE7;Q9Z108;A2A5R8	Double-stranded RNA-binding protein Staufen homolog 1	Stau1	1.65698	#VALUE!	-0.295777	-1.29814		0.823831	NaN	0.122076	0.511164	5.4871e-10	4	0	6	3
A2A5V4;P55194;A2A5V2;A2A5V3;A2A5V1	A2A5V4;P55194;A2A5V2;A2A5V3	SH3 domain-binding protein 1	Sh3bp1	-0.525958	-0.134714	1.00533	-0.234028		-0.250509	-0.0543623	-0.396555	0.109294	2.2998e-112	9	7	13	7
A2A690-2;A2A690;F6VP19	A2A690-2;A2A690;F6VP19	Protein TANC2	Tanc2	0.0482724	-0.191299	2.26535	-0.0251432		0.0321009	-0.0796457	-0.898807	0.0304066	1.2077e-11	3	1	2	1
Q9CZ28;A2A6M1	Q9CZ28;A2A6M1	Vacuolar-sorting protein SNF8	Snf8	1.22335	0.0334312	1.08578	1.29166		0.610417	0.0207689	-0.428624	-0.466895	2.5243e-203	6	1	7	2
Q8R035;A2A6T4;Q8R035-2;D6RHR8	Q8R035;A2A6T4;Q8R035-2;D6RHR8	Peptidyl-tRNA hydrolase ICT1, mitochondrial	Ict1	1.59116	1.57278	1.22806	1.24527		0.791439	0.708585	-0.485337	-0.449375	1.1499e-20	6	4	4	8
A2A7A7;Q8CFX1;A2A7A8	A2A7A7;Q8CFX1	GDH/6PGL endoplasmic bifunctional protein;Glucose 1-dehydrogenase;6-phosphogluconolactonase	H6pd	0.805766	0.692417	0.540862	0.67657		0.404903	0.315218	-0.211415	-0.234601	5.4097e-135	26	8	34	24
A2A7F4;E9Q532	A2A7F4;E9Q532		Rlf	-1.08335	#VALUE!	0.150885	-0.0251432		-0.524832	NaN	-0.0559662	0.0304066	9.0074e-106	1	0	4	1
A2A837;Q542V3;Q8VE97	A2A837;Q542V3;Q8VE97	Serine/arginine-rich splicing factor 4	Srsf4	0.300565	-0.0653911	1.91121	2.23381		0.156267	-0.0233871	-0.757648	-0.822707	1.9675e-56	2	1	2	2
Q8BHG2-3;Q8BHG2;A2A8E2;Q8BHG2-2;B7ZC71;B7ZC72;A2A8E4;D6REH4	Q8BHG2-3;Q8BHG2;A2A8E2;Q8BHG2-2;B7ZC71;B7ZC72	UPF0587 protein C1orf123 homolog	0610037L13Rik	0.484339	0.684102	0.172319	0.107719		0.246712	0.311503	-0.0645101	-0.0197699	1.3256e-17	5	4	11	3
A2A8R7;B2RX14	A2A8R7;B2RX14	Terminal uridylyltransferase 4	Zcchc11	-1.55834	-0.711091	-0.590412	#VALUE!		-0.758599	-0.3119	0.23952	#VALUE!	1.2585e-44	2	1	3	0
E9PUK6;A2A8V9;Q52KI8;A2A8V8;E9QKA4;Q52KI8-2;F6UK16;F7BWM1;A2A983	E9PUK6;A2A8V9;Q52KI8;A2A8V8;E9QKA4;Q52KI8-2	Serine/arginine repetitive matrix protein 1	Srrm1	-0.300673	-0.504346	-0.282448	-0.435778		-0.139633	-0.219522	0.116764	0.185486	0	6	7	12	5
A2A8Z1;E9PXZ2;F6UHR6;E9Q6C1	A2A8Z1;E9PXZ2;F6UHR6;E9Q6C1	Oxysterol-binding protein-related protein 9;Oxysterol-binding protein	Osbpl9	-0.470173	1.43926	0.340189	-0.00376309		-0.223054	0.648926	-0.131424	0.0223323	2.8764e-50	3	3	5	4
A2A9B9;Q99J07;A8Y5H7	A2A9B9;Q99J07;A8Y5H7		Sec14l1	#VALUE!	-2.18347	-1.50616	-1.76722		NaN	-0.969791	0.604546	0.688315	2.7525e-27	0	2	4	3
A2A9C3;A2A9C3-2	A2A9C3;A2A9C3-2	Protein SZT2	Szt2	-2.29091	-0.876879	#VALUE!	-0.891243		-1.11913	-0.385978	#VALUE!	0.357496	5.6501e-46	3	1	0	1
Q8R1A4;A2A9M5;Q8R1A4-2;E9PX48;A2A9M4;A2AW79;F6ZJ55	Q8R1A4;A2A9M5;Q8R1A4-2;E9PX48	Dedicator of cytokinesis protein 7	Dock7	-0.383633	-0.262608	0.73718	0.279001		-0.180463	-0.111508	-0.289669	-0.0844561	0	59	39	66	43
P24788;A2A9P6;P24788-2;Q64434	P24788;A2A9P6;P24788-2	Cyclin-dependent kinase 11B	Cdk11b	-0.132072	-0.0403516	-0.754626	-0.0756775		-0.0566563	-0.0121989	0.304978	0.0494913	6.2028e-53	1	1	3	2
A2A9Q2;Q8BHG1;A6PWC3;Q3V3G9	A2A9Q2;Q8BHG1;A6PWC3	Nardilysin	Nrd1	-0.308498	-0.36553	-0.877612	-0.925673		-0.143484	-0.157496	0.354001	0.370499	0	64	79	77	67
Q3U2P1;A2AA71;Q3U2P1-2;A2AA72	Q3U2P1;A2AA71	Protein transport protein Sec24A	Sec24a	-1.70034	-1.51071	-1.18138	-1.59111		-0.828486	-0.669189	0.475085	0.621806	1.3735e-75	18	17	25	16
Q6NXN1;A2AA85;Q6NXN1-2;A2AA86	Q6NXN1;A2AA85;Q6NXN1-2;A2AA86	UPF0485 protein C1orf144 homolog	D4Ertd22e	-1.22077	-1.60258	-1.20345	-0.698306		-0.592462	-0.710236	0.48388	0.284633	6.5646e-83	3	2	4	3
A2AAE1-3;A2AAE1-2;A2AAE1;A2AAE1-6;A2AAE1-4;F6RPM4;F6YAT5;A2AB97;A2AAE1-5;F6YB09	A2AAE1-3;A2AAE1-2;A2AAE1;A2AAE1-6;A2AAE1-4	Uncharacterized protein KIAA1109	Kiaa1109	-0.327892	-0.560968	#VALUE!	-0.348111		-0.153029	-0.244822	#VALUE!	0.152378	3.4925e-101	2	1	0	2
O35250;A2AAN0;O35250-2;A2AAN3;A2AAN4	O35250;A2AAN0;O35250-2	Exocyst complex component 7	Exoc7	1.4212	1.00341	1.19016	1.03417		0.70779	0.454176	-0.470229	-0.36965	3.7648e-15	3	3	4	1
A2AAY5	A2AAY5	SH3 and PX domain-containing protein 2B	Sh3pxd2b	-3.97978	-5.42142	-4.00022	-4.77363	Down	-1.95031	-2.41658	1.5987	1.82371	1.6218e-47	3	2	2	3
A2ABV5;A2ABV5-2;A2BDN7;A2BDP0;A2ABV5-3;A2ABV5-4	A2ABV5;A2ABV5-2;A2BDN7;A2BDP0	Mediator of RNA polymerase II transcription subunit 14	Med14	-0.749541	-1.12936	-1.17121	-0.873009		-0.360546	-0.49879	0.471031	0.35061	2.4652e-54	1	8	8	5
Q922E4;A2ABY3	Q922E4;A2ABY3	Ethanolamine-phosphate cytidylyltransferase	Pcyt2	-0.572533	-1.28617	-1.93148	-0.730163		-0.27343	-0.568859	0.774081	0.296663	2.3884e-17	4	2	4	2
A2ACM0;Q8K4Q0;Q8K4Q0-2;Q8K4Q0-3;E9PXZ5;F7CN67;Q8K4Q0-4;F7BQS0;F6U5L3	A2ACM0;Q8K4Q0;Q8K4Q0-2	Regulatory-associated protein of mTOR	Rptor	-0.484475	#VALUE!	0.24538	-0.457552		-0.230093	NaN	-0.0936328	0.193709	0	6	0	2	4
A2ACV6;E1U8D0	A2ACV6;E1U8D0		9830001H06Rik;Soga	8.94561	1.03577	-2.85373	0.831827		4.41095	0.468635	1.14169	-0.293235	1.0645e-19	4	3	5	2
Q9QXG2;A2AD03;Q3UR39	Q9QXG2;A2AD03;Q3UR39	Rab proteins geranylgeranyltransferase component A 1	Chm	-0.946368	#VALUE!	-0.584582	-0.398646		-0.457415	NaN	0.237197	0.171463	1.2394e-11	4	0	8	3
A2ADH1;F6WHL0;Q9CQY5;F6TBV1;Q9CQY5-3;Q9CQY5-2	A2ADH1;F6WHL0;Q9CQY5;F6TBV1;Q9CQY5-3;Q9CQY5-2	Magnesium transporter protein 1	Magt1	1.92534	1.83709	1.55512	1.32832		0.955908	0.826681	-0.615707	-0.48074	8.8465e-44	16	4	9	4
Q8R3G1;A2ADR8	Q8R3G1;A2ADR8	Nuclear inhibitor of protein phosphatase 1	Ppp1r8	-0.12732	-1.7757	-0.94828	#VALUE!		-0.0543174	-0.787593	0.382169	#VALUE!	7.6857e-110	2	5	8	0
A2ADY9	A2ADY9	Protein DDI1 homolog 2	Ddi2	-0.0154878	-0.213005	0.740324	-0.13683		0.000721115	-0.0893441	-0.290921	0.0725861	1.4777e-24	4	3	6	2
A2AE27;Q9DBT5;A2AE22;F7ATG4;F7D159;F6WIB6;O08739;A2AE25	A2AE27;Q9DBT5	AMP deaminase 2	Ampd2	-2.48272	#VALUE!	-2.61628	-2.56896		-1.21354	NaN	1.04705	0.9911	1.1454e-58	15	0	15	8
A2AEM2;Q99LI2	A2AEM2;Q99LI2	Chloride channel CLIC-like protein 1	Clcc1	1.3927	0.546981	1.84608	2.33432		0.693766	0.250234	-0.731686	-0.860661	2.1371e-26	1	4	3	5
A2AEW8;Q8VD04;A2AEW9;A2AEW5;A2AEW6	A2AEW8;Q8VD04;A2AEW9	GRIP1-associated protein 1	Gripap1	-0.746343	#VALUE!	0.159473	-0.266471		-0.358972	NaN	-0.0593897	0.121546	7.1815e-10	1	0	4	2
A2AEX6;A2AEX8;P97447;A2AEY1;A2AEY0;A2AEX9	A2AEX6;A2AEX8;P97447;A2AEY1	Four and a half LIM domains protein 1	Fhl1	-4.36791	-4.47171	-1.40405	-2.84151	Down	-2.14133	-1.99223	0.563841	1.09403	0	29	15	33	17
A2AF47	A2AF47	Dedicator of cytokinesis protein 11	Dock11	-2.67445	-2.93106	-2.42107	-2.49679		-1.30789	-1.30383	0.969233	0.963844	1.2593e-101	25	22	25	24
A2AFF6;O35638;Q3UQG8	A2AFF6;O35638	Cohesin subunit SA-2	Stag2	-1.24995	-0.815446	-0.584888	-1.0953		-0.606825	-0.358528	0.237319	0.434562	1.9797e-37	6	10	15	17
A2AFQ0;Q7TMY8;Q7TMY8-3;Q7TMY8-4;Q7TMY8-2;F6XP90;F6UYC1	A2AFQ0;Q7TMY8;Q7TMY8-3;Q7TMY8-4;Q7TMY8-2	E3 ubiquitin-protein ligase HUWE1	Huwe1	0.95721	1.19621	2.5643	2.33404		0.479438	0.540325	-1.01797	-0.860557	0	118	103	306	153
A2AG68;Q64430	A2AG68;Q64430	Copper-transporting ATPase 1	Atp7a	#VALUE!	1.3197	0.635712	0.230063		NaN	0.595504	-0.249222	-0.0659742	1.7044e-18	0	1	4	1
A2AGH6;A2AGH9;A2AGH6-2;A2AGH8;A2AGH6-3	A2AGH6;A2AGH9;A2AGH6-2;A2AGH8	Mediator of RNA polymerase II transcription subunit 12	Med12	-0.946531	-1.11811	-0.754626	-1.07603		-0.457494	-0.493764	0.304978	0.427284	4.8725e-30	7	3	8	5
A2AH85;O08810;G3UZ34;G3UXK8	A2AH85;O08810;G3UZ34	116 kDa U5 small nuclear ribonucleoprotein component	Eftud2	0.252296	0.0939669	0.516515	0.559324		0.132511	0.0478175	-0.201709	-0.190322	0	64	43	55	61
O88708;A2AI40;CON__Q2YDI2	O88708;A2AI40	Origin recognition complex subunit 4	Orc4	-1.3198	-1.57643	-1.75985	-2.27711		-0.641199	-0.698553	0.705668	0.880881	1.7574e-08	2	2	3	2
A2AI52;Q80U87	A2AI52;Q80U87	Ubiquitin carboxyl-terminal hydrolase;Ubiquitin carboxyl-terminal hydrolase 8	Usp8	-1.10715	-1.03414	-1.10321	-1.48794		-0.536545	-0.456247	0.443925	0.582845	1.6482e-73	8	11	16	13
Q9D711;A2AIH8	Q9D711;A2AIH8	Pirin	Pir	#VALUE!	0.492778	2.64839	1.71066		NaN	0.226015	-1.05149	-0.625133	1.8314e-12	0	2	1	1
A2AIX1;E9QAT4;F7BPW6;F6T8X6	A2AIX1;E9QAT4		Sec16a	-3.29249	-2.67928	-0.480858	-1.9894		-1.61206	-1.19133	0.195852	0.772224	5.8712e-102	12	13	11	10
A2AJ15;A2AJ14	A2AJ15	Endoplasmic reticulum mannosyl-oligosaccharide 1,2-alpha-mannosidase	Man1b1	0.171502	-0.442386	-0.480858	-0.394235		0.0927488	-0.191837	0.195852	0.169797	2.0676e-24	7	5	10	6
Q3TIX6;A2AJ72;F7AM43;A2AJ71;F6S444	Q3TIX6;A2AJ72		Fubp3	-1.98236	-1.66375	-1.45751	-2.77071		-0.967278	-0.737567	0.585155	1.06729	1.1635e-68	12	5	3	4
O70311;A2AJH3;Q8CFK1	O70311;A2AJH3;Q8CFK1	Glycylpeptide N-tetradecanoyltransferase 2;Glycylpeptide N-tetradecanoyltransferase	Nmt2	-3.17877	-3.30789	-2.84698	-3.0333	Down	-1.5561	-1.47221	1.13901	1.16646	0	12	4	9	12
A2AJI0;A8Y5P4;A2AJI0-2;A2AJI1;F6WF36	A2AJI0;A8Y5P4;A2AJI0-2;A2AJI1;F6WF36	MAP7 domain-containing protein 1	Map7d1;Mtap7d1	0.395802	0.183606	0.333613	0.0105569		0.203139	0.0878702	-0.128803	0.0169242	0	10	12	18	11
A2AKD7;Q61234	A2AKD7;Q61234	Alpha-1-syntrophin	Snta1	4.66946	2.1477	2.97548	3.09542	Up	2.30644	0.96547	-1.18187	-1.1481	5.5933e-84	2	2	6	5
A2AKG8;E9PYJ6;A2AKG8-2	A2AKG8;E9PYJ6	Focadhesin	Focad;BC057079	0.680004	0.583957	1.02027	0.961664		0.34301	0.266757	-0.402512	-0.342269	1.8968e-56	12	5	22	25
Q8JZX5;Q9D1G5;A2AKH7;B0R031	Q8JZX5;Q9D1G5;A2AKH7	Leucine-rich repeat-containing protein 57	Lrrc57	0.174249	0.496641	0.14735	0.265012		0.0941009	0.227741	-0.0545571	-0.0791732	1.0823e-11	5	3	6	2
Q8BG05;A2AL12;A2AL13	Q8BG05;A2AL12	Heterogeneous nuclear ribonucleoprotein A3	Hnrnpa3	-0.573383	-0.12053	-0.476747	-0.63379		-0.273849	-0.0480244	0.194213	0.260267	0	34	40	51	37
A2AL50;Q8C0I1;H3BKN2;A2AL49;H3BIY5;H3BJ14	A2AL50;Q8C0I1;H3BKN2;A2AL49	Alkyldihydroxyacetonephosphate synthase, peroxisomal	Agps	0.551264	0.578586	0.28534	0.336461		0.27965	0.264356	-0.109561	-0.106156	0	43	23	38	29
Q8BSY0;A2AL85;Q8CBM2;A2AL81;Q3TU40;A2AL78;Q6P8S1;A2AL79;A2AL83;A2AL75;A2AL76;A2AL74;Q9CR06;A2AL77;A2AL71	Q8BSY0;A2AL85;Q8CBM2	Aspartyl/asparaginyl beta-hydroxylase	Asph	0.20376	0.0397903	0.209105	-0.0109033		0.108625	0.0236102	-0.0791732	0.0250288	0	68	41	68	61
Q62276;A2ALA4;Q62276-2	Q62276;A2ALA4;Q62276-2	Mediator of RNA polymerase II transcription subunit 22	Med22	-0.353065	-0.645116	-0.978974	-0.588871		-0.165418	-0.282421	0.394404	0.243303	3.1931e-60	4	4	12	4
Q8CBC7;Q8JZY1;A2ALH2;F6Q475	Q8CBC7;Q8JZY1;A2ALH2		Ftsj1	-0.944156	-2.23955	-0.313027	#VALUE!		-0.456326	-0.994844	0.128953	#VALUE!	7.7976e-16	4	1	6	0
A7TU71;A2ALU4;A2ALU4-2	A7TU71;A2ALU4;A2ALU4-2	Protein Shroom2	Shroom2	-2.74778	-3.11137	-4.0603	-0.513586	Down	-1.34399	-1.3844	1.62265	0.214871	2.8257e-51	1	2	3	2
A2ALW5;A2ALW5-2;F2Z3Z8;F2Z410;G3UZK1	A2ALW5;A2ALW5-2	DnaJ homolog subfamily C member 25	Dnajc25	3.10999	3.87429	2.79154	2.50055	Up	1.53894	1.73695	-1.10855	-0.923441	1.1541e-20	5	3	6	4
A2AM05;A2AM05-4;A2AM05-3	A2AM05;A2AM05-4	Centlein	Cntln	3.19716	#VALUE!	-0.076064	-0.379264		1.58183	NaN	0.0344974	0.164143	2.2217e-07	1	0	2	1
Q80XI3-3;A2AMI2;Q80XI3;Q80XI3-4;Q80XI3-2;A2AMI7;A2AMI6;Q8BQR8;A2AMI4	Q80XI3-3;A2AMI2;Q80XI3;Q80XI3-4;Q80XI3-2;A2AMI7	Eukaryotic translation initiation factor 4 gamma 3	Eif4g3	0.333522	0.0704553	3.31484	#VALUE!		0.172487	0.037312	-1.31714	#VALUE!	4.4641e-47	1	1	8	0
Q91VX2;A2AMY5;F6PYV5;A2AMY7;F6WTC8	Q91VX2;A2AMY5	Ubiquitin-associated protein 2	Ubap2	-4.30927	-1.93174	-3.24484	-4.39633	Down	-2.11247	-0.857312	1.2976	1.68122	3.8708e-85	15	15	17	18
A2AN08;A2AN08-3;A2AN08-5;A2AN08-2;F6SSP6;A2AN08-4	A2AN08;A2AN08-3;A2AN08-5	E3 ubiquitin-protein ligase UBR4	Ubr4	-0.852066	-1.05	-0.893153	-1.02945		-0.411004	-0.46333	0.360196	0.40969	0	225	227	457	274
A2ANY6;J3QMC5	A2ANY6;J3QMC5	Midasin	Mdn1	-0.262014	-0.384892	-0.443059	-0.608508		-0.120608	-0.166147	0.180784	0.250719	0	85	51	179	110
A2AP24;Q8K2H2;F6VDQ9	A2AP24;Q8K2H2	OTU domain-containing protein 6B	Otud6b	-1.15802	-0.705726	-0.377002	-1.2059		-0.561579	-0.309502	0.154454	0.47633	5.848e-73	9	1	11	2
A2APB8	A2APB8	Targeting protein for Xklp2	Tpx2	0.728139	#VALUE!	1.03432	-0.467558		0.3667	NaN	-0.40811	0.197488	2.3961e-51	1	0	1	1
A2API5;Q9JI18;E9Q202	A2API5;Q9JI18;E9Q202	Low-density lipoprotein receptor-related protein 1B	Lrp1b	1.76333	1.75242	2.71219	2.56565		0.876173	0.788853	-1.07692	-0.948029	4.4086e-12	2	2	3	2
F7AA26;A2API8;O54931;O54931-2;O54931-4;O54931-5;O54931-3;A2API9;A2APJ1	F7AA26;A2API8;O54931;O54931-2;O54931-4;O54931-5;O54931-3	A-kinase anchor protein 2	Gm20459;Akap2	-2.88317	-3.70864	-1.6175	-1.47747		-1.41062	-1.65127	0.648926	0.57889	1.6801e-77	7	1	9	4
A2APM2;P15379;P15379-7;P15379-8;A2APM1;P15379-4;P15379-9;P15379-10;Q80X37;E9QKM8;P15379-5;P15379-11;A2APM4;P15379-6;A2APM3;P15379-3;A2APM5;Q3U8S1;P15379-2;P15379-13;P15379-12	A2APM2;P15379;P15379-7;P15379-8;A2APM1;P15379-4;P15379-9;P15379-10;Q80X37;E9QKM8;P15379-5;P15379-11;A2APM4;P15379-6;A2APM3;P15379-3;A2APM5;Q3U8S1;P15379-2	CD44 antigen	Cd44	0.350123	0.604825	0.315179	0.492782		0.180657	0.27608	-0.121455	-0.165192	2.4776e-56	17	9	19	9
Q80TY0;A2AQ41;A2AQ45;A2AQ42;A2AQ44;A2AQ43;Q80TY0-3;Q80TY0-2;Q80TY0-4;Q80TY0-5;A2AQ47;F6VVN1	Q80TY0;A2AQ41;A2AQ45;A2AQ42;A2AQ44;A2AQ43;Q80TY0-3;Q80TY0-2;Q80TY0-4;Q80TY0-5;A2AQ47	Formin-binding protein 1	Fnbp1	#VALUE!	-0.976628	-0.0764172	-0.35395		NaN	-0.430548	0.0346383	0.154583	3.17e-27	0	1	3	2
A2AQ53	A2AQ53		Fbn1	2.61211	2.4805	0.959645	1.69555		1.2939	1.11417	-0.378344	-0.619426	0	41	35	118	31
Q8CFQ3;A2AQA7	Q8CFQ3;A2AQA7	Intron-binding protein aquarius	Aqr	#VALUE!	0.567546	-0.567344	-0.679445		NaN	0.259423	0.230326	0.277509	1.2507e-12	0	4	5	6
A2AQN4;A2AQN5;Q9QXG4;F7CU63;D6RHA7	A2AQN4;A2AQN5;Q9QXG4	Acetyl-coenzyme A synthetase, cytoplasmic	Acss2	-0.310991	1.94873	-2.61347	-2.75702		-0.144712	0.876566	1.04593	1.06212	6.3606e-163	5	5	7	5
O54819;A2ARA0	O54819;A2ARA0	Tissue factor pathway inhibitor	Tfpi	-1.45892	-1.3466	-2.01826	-2.51672		-0.70967	-0.59586	0.808673	0.971369	6.9671e-88	8	6	9	12
Q8C0L0;A2ARI0	Q8C0L0;A2ARI0	Thioredoxin-related transmembrane protein 4	Tmx4	0.716978	1.24185	2.65356	2.18021		0.361207	0.560715	-1.05355	-0.802462	1.4617e-05	3	2	3	2
A2ARP1;A2ARP1-2;A2ARP1-3;F6RMX0;F6VID9;F7AST3;F6Q5C6;A2ARP1-7	A2ARP1;A2ARP1-2;A2ARP1-3;F6RMX0	Inositol hexakisphosphate and diphosphoinositol-pentakisphosphate kinase 1	Ppip5k1	0.04282	0.297913	#VALUE!	1.73596		0.0294175	0.138945	#VALUE!	-0.634688	7.5731e-57	1	1	0	1
A2ARP8;Q9QYR6-2;Q9QYR6	A2ARP8;Q9QYR6-2;Q9QYR6	Microtubule-associated protein 1A;MAP1 light chain LC2	Mtap1a;Map1a	-1.43006	-2.8875	-2.27373	-3.08366		-0.695466	-1.28437	0.910502	1.18549	0	58	69	108	71
A2AS03;E9QAM5;A2AS05	A2AS03;E9QAM5;A2AS05		BC006779	-2.89849	-3.10177	-4.08911	-3.76939	Down	-1.41816	-1.38011	1.63413	1.44446	4.0528e-178	19	10	27	20
A2AS98;P28660;P28660-2	A2AS98;P28660;P28660-2	Nck-associated protein 1	Nckap1	0.188222	0.0995846	0.285145	0.354763		0.100978	0.0503276	-0.109483	-0.113068	0	60	45	61	39
A2AT37;F6Q3G7	A2AT37		Upf2	-1.09481	-1.5244	-1.10267	-0.964481		-0.530468	-0.675305	0.443713	0.385155	2.3308e-54	5	8	12	6
Q99JX3;A2ATI9;Q99JX3-2;A2ATI6;A2ATI8	Q99JX3;A2ATI9;Q99JX3-2;A2ATI6;A2ATI8	Golgi reassembly-stacking protein 2	Gorasp2	-0.617771	-0.587901	-0.567653	-1.04065		-0.295695	-0.256856	0.230449	0.413919	0	13	26	20	25
Q8C854;Q8C854-3;A2ATP6;A2ATP5;Q8C854-2;G8JL68;Q8C854-1;F6XJA1	Q8C854;Q8C854-3;A2ATP6;A2ATP5;Q8C854-2;G8JL68;Q8C854-1;F6XJA1	Myelin expression factor 2	Myef2	0.236205	-0.112595	-0.0908755	-0.0992292		0.124593	-0.0444789	0.0404014	0.0583858	4.7441e-91	17	9	26	14
Q64012;A2AU62;Q64012-2;A2AU61;A2AU60	Q64012;A2AU62;Q64012-2;A2AU61;A2AU60	RNA-binding protein Raly	Raly;C130057N11Rik	0.343131	-0.234304	0.0454308	-0.642391		0.177216	-0.0988609	-0.0139314	0.263515	3.5647e-268	6	2	11	3
A2AU91;P70399;A2AU89;P70399-3;A2AU90;P70399-2;F6QNC8;F6ZRL3;F6S5E4;F7CE65	A2AU91;P70399;A2AU89;P70399-3;A2AU90	Tumor suppressor p53-binding protein 1	Trp53bp1;Tp53bp1	-3.33037	-2.91396	#VALUE!	-3.08838	Down	-1.63071	-1.29619	#VALUE!	1.18726	0	5	5	0	3
A2AUD5;Q9CYZ2;Q3TAI4	A2AUD5;Q9CYZ2;Q3TAI4	Tumor protein D54	Tpd52l2	0.22111	0.0267408	0.686527	0.580435		0.117163	0.0177795	-0.269477	-0.198295	0	31	44	41	35
Q99PL5;A2AVJ7;Q99PL5-2;Q99PL5-3;Q99PL5-4;Q99PL5-6;Q99PL5-7;Q99PL5-8;Q99PL5-5;Q99PL5-9;Q99PL5-10;Q99PL5-11;Q99PL5-12	Q99PL5;A2AVJ7	Ribosome-binding protein 1	Rrbp1	2.49166	2.05205	2.04358	1.78906		1.23462	0.922731	-0.810409	-0.65474	0	381	286	406	255
A2AW86;Q60767	A2AW86;Q60767	Lymphocyte antigen 75	Ly75	0.886562	0.745438	1.3652	0.62022		0.444667	0.338909	-0.540002	-0.21332	1.1654e-73	17	18	23	26
A2AWA9;A2AWA9-2;A2AWA7;A2AWA9-3;A2AWB0;A6H6A9-3	A2AWA9;A2AWA9-2	Rab GTPase-activating protein 1	Rabgap1	-0.994418	-1.33433	-0.983927	-0.867912		-0.481062	-0.590375	0.396379	0.348686	2.1871e-240	23	30	36	30
A2AWI7;Q8R3V5;Q8R3V5-1;Q8R3V5-3;A2AWI9	A2AWI7;Q8R3V5;Q8R3V5-1;Q8R3V5-3;A2AWI9	Endophilin-B2	Sh3glb2	-0.56542	-0.932888	-0.711895	-1.02743		-0.26993	-0.411004	0.287945	0.408929	6.2398e-12	2	5	4	3
A2AWN8;P59326	A2AWN8;P59326	YTH domain family protein 1	Ythdf1	5.2086	9.41218	#VALUE!	4.85773	Up	2.57177	4.2114	#VALUE!	-1.81365	2.1106e-34	1	1	0	1
Q9EQU5;A2BE93;A2BE92;Q9EQU5-3	Q9EQU5;A2BE93;A2BE92;Q9EQU5-3	Protein SET	Set	-2.81973	-3.14696	-2.21412	-1.99833		-1.37939	-1.4003	0.886745	0.775598	0	40	29	35	42
P70175;A2BEE9;Q52KF7;A2BEF2	P70175;A2BEE9;Q52KF7;A2BEF2	Disks large homolog 3	Dlg3	#VALUE!	-1.14738	-0.0498191	-0.101063		NaN	-0.506845	0.024036	0.0590783	7.0496e-07	0	2	2	1
E9QAQ7;A2BH40-2;A2BH40-4;A2BH40;A2BH40-3	E9QAQ7;A2BH40-2;A2BH40-4;A2BH40;A2BH40-3	AT-rich interactive domain-containing protein 1A	Arid1a	-0.953139	-0.788936	-0.651211	-1.05524		-0.460747	-0.346683	0.263756	0.419431	2.6699e-219	3	4	1	3
A2CG35;P35283	A2CG35;P35283	Ras-related protein Rab-12	Rab12	1.93892	2.21803	2.48779	2.51456		0.962586	0.996895	-0.987474	-0.928732	2.0059e-187	7	3	11	6
A2RSY6-2;A2RSY6;A2RSY6-3	A2RSY6-2;A2RSY6	TRMT1-like protein	Trmt1l	0.596077	#VALUE!	-0.321624	-0.554835		0.301705	NaN	0.132379	0.230449	2.364e-78	2	0	8	4
Q6PHQ9;A3KFU5;A3KFU8;D3Z5M2;Q91YZ8;G5E8X2	Q6PHQ9;A3KFU5;A3KFU8;D3Z5M2;Q91YZ8		Pabpc4;Gm10110	-0.858739	-0.951142	-1.39252	-1.36747		-0.414288	-0.41916	0.559247	0.537346	0	22	14	26	26
Q8BLX7;A3KFV4;A3KFV7;A3KFV3;E9Q0X4	Q8BLX7;A3KFV4;A3KFV7;A3KFV3;E9Q0X4	Collagen alpha-1(XVI) chain	Col16a1	#VALUE!	0.377276	4.06979	4.72316		NaN	0.174406	-1.61807	-1.76283	9.0097e-119	0	1	2	1
A3KG93;Q6ZQ88;G8JL40;F6Z4I3;F6ZC60	A3KG93;Q6ZQ88;G8JL40	Lysine-specific histone demethylase 1A	Kdm1a	-1.46046	-1.97674	-1.85858	-1.97708		-0.710425	-0.87742	0.745022	0.76757	1.3352e-126	5	2	16	8
A3KGB4	A3KGB4	TBC1 domain family member 8B	Tbc1d8b	2.04337	1.99413	2.52428	2.44245		1.014	0.896853	-1.00202	-0.9015	2.9886e-89	11	8	23	10
A3KGF9	A3KGF9	Uncharacterized protein C15orf52 homolog		#VALUE!	4.49297	-1.1141	1.27533		NaN	2.01339	0.448267	-0.460727	1.2687e-10	0	1	1	1
A3KGQ6;Q9D898	A3KGQ6;Q9D898	Actin-related protein 2/3 complex subunit 5;Actin-related protein 2/3 complex subunit 5-like protein	Arpc5l	0.154409	0.107681	0.157362	0.0804363		0.0843364	0.0539454	-0.058548	-0.00946627	3.1055e-69	10	9	14	9
A3KGU7	A3KGU7		Spna2	#VALUE!	0.450822	0.857597	0.423253		NaN	0.207268	-0.337667	-0.138934	0	0	2	1	3
Q8K0T0;A3QM89;Q7M6W1	Q8K0T0;A3QM89;Q7M6W1	Reticulon-1	Rtn1	1.23389	1.26127	0.228619	0.307786		0.615605	0.569394	-0.0869516	-0.095327	5.7836e-07	7	4	7	4
A6H5Z3;A6H5Z3-2	A6H5Z3;A6H5Z3-2	Exocyst complex component 6B	Exoc6b	0.939919	0.930713	1.049	0.792291		0.470927	0.421695	-0.413961	-0.278304	1.4093e-30	3	1	7	8
A6H6A5;Q00175;E9QPW3	A6H6A5;Q00175;E9QPW3	Progesterone receptor	Pgr	3.22154	0.577243	5.28873	4.41087	Up	1.59383	0.263756	-2.10395	-1.64489	7.7186e-38	2	1	5	2
A6H6E9;F6SJC5;E9Q190	A6H6E9;F6SJC5	Tetratricopeptide repeat protein 23-like	Ttc23l	3.22707	0.807133	2.45571	2.221		1.59655	0.366476	-0.974688	-0.817867	4.2271e-08	4	3	5	2
A6PW47;Q99K74;Q99K74-2;Q99K74-3;A6PW46	A6PW47;Q99K74;Q99K74-2;Q99K74-3	Mediator of RNA polymerase II transcription subunit 24	Med24	-0.516593	#VALUE!	-0.671351	-0.635064		-0.245899	NaN	0.271784	0.260748	4.4923e-78	3	0	6	2
A6PW84;Q3V1T4;A2A7Q5;Q3V1T4-3;Q3V1T4-2;F2Z499	A6PW84;Q3V1T4;A2A7Q5;Q3V1T4-3;Q3V1T4-2	Prolyl 3-hydroxylase 1	Lepre1	3.08089	3.59407	2.52632	2.32192	Up	1.52462	1.61174	-1.00283	-0.85598	0	34	12	39	28
Q9CWU6;A6PWX9;F6V305;A6PWX7;A6PWX8;Q9CWU6-2;D6RJ83	Q9CWU6;A6PWX9;F6V305;A6PWX7;A6PWX8	Ubiquinol-cytochrome c reductase complex chaperone CBP3 homolog	Uqcc	0.28368	#VALUE!	-0.426095	-0.628683		0.147958	NaN	0.174023	0.258338	5.0393e-17	3	0	10	3
A6X8Z5;Q640N3;E9QMX7;Q640N3-2	A6X8Z5	Rho GTPase-activating protein 31	Arhgap31	3.47168	0.316334	-1.77513	0.19246		1.71695	0.147176	0.711759	-0.051773	8.7999e-146	2	4	1	3
A8C756;A8C756-2;A8C756-3;A8C756-5;A8C756-4	A8C756	Thyroid adenoma-associated protein homolog	Thada	-2.06802	-2.02437	-1.97084	-2.24043		-1.00944	-0.8987	0.789771	0.867027	2.1843e-111	24	10	36	9
O55101;B0QZP8;H3BIZ8;H3BKF4;H3BJ78;H3BJY1	O55101;B0QZP8;H3BIZ8;H3BKF4;H3BJ78;H3BJY1	Synaptogyrin-2	Syngr2	1.68975	1.57337	2.09884	1.98114		0.83996	0.708849	-0.832437	-0.727284	0.00010042	2	2	1	4
Q5SS80;B0QZT2;Q5SS80-2	Q5SS80;B0QZT2;Q5SS80-2	Dehydrogenase/reductase SDR family member 13	Dhrs13	-0.30455	#VALUE!	0.621287	0.491283		-0.141542	NaN	-0.243472	-0.164626	2.571e-12	3	0	4	3
B1AQF4;Q9D7X3;H3BKL8;Q3V2Y9;H3BKD1	B1AQF4;Q9D7X3;H3BKL8;Q3V2Y9;H3BKD1	Dual specificity protein phosphatase 3	Dusp3	-2.58306	-2.56339	-1.0195	-1.04265		-1.26292	-1.13955	0.410558	0.414677	1.8808e-180	15	16	11	9
G3X9T7;O08573;B1AQR8;O08573-2	G3X9T7;O08573;B1AQR8;O08573-2	Galectin-9	Lgals9	-0.619498	-1.02234	-0.878743	-1.02254		-0.296545	-0.450972	0.354452	0.407081	1.1101e-217	22	28	45	27
B1AQZ0;B1AQY9;Q8CHH9-2;Q8CHH9;B7ZC46;E0CYM4	B1AQZ0;B1AQY9;Q8CHH9-2;Q8CHH9;B7ZC46	Septin-8	2008-09-01	1.55469	1.94362	2.87601	2.61961		0.77349	0.874285	-1.14223	-0.968407	1.9954e-85	8	5	4	4
B1AQZ2;P28741;Q3UI47;Q3TET1;B1AQZ5;F6V6Z9	B1AQZ2;P28741;Q3UI47;Q3TET1;B1AQZ5	Kinesin-like protein KIF3A	Kif3a	#VALUE!	-2.63483	-2.5145	-2.12043		NaN	-1.17147	1.00648	0.82171	5.3068e-55	0	1	8	4
B1AR74;Q8CCN5;Q0VF62;F7C0F2;F7CPM1;B1AR76;Q8CCN5-2;F6VJ09	B1AR74;Q8CCN5;Q0VF62;F7C0F2;F7CPM1;B1AR76	Breast carcinoma-amplified sequence 3 homolog	Bcas3	-0.0447271	0.227059	1.3236	2.54009		-0.0136692	0.107286	-0.523421	-0.938376	6.7125e-35	2	4	3	5
B1ARD6;F6UG04;F8VQC3	B1ARD6;F6UG04		Slfn9	-2.29786	-2.59506	-3.72082	-3.86723	Down	-1.12255	-1.1537	1.48733	1.4814	2.6735e-212	13	13	40	36
B1ART2;B1ART1;F6XI52	B1ART2;B1ART1		Vps13d	1.22795	#VALUE!	0.105829	0.89536		0.612683	NaN	-0.0380063	-0.317229	1.6652e-13	1	0	2	3
E9PVY8;B1ARU4;E9QA63;Q9QXZ0;Q9QXZ0-2;E9QNP1;Q9QXZ0-4;F6YKN8;F6RCJ3;F7AB76;Q9CYG3	E9PVY8;B1ARU4;E9QA63;Q9QXZ0;Q9QXZ0-2;E9QNP1;Q9QXZ0-4	Microtubule-actin cross-linking factor 1	Macf1	2.47955	2.38081	2.0133	1.75135		1.22866	1.06963	-0.798341	-0.640501	0	129	99	269	164
Q99LY9;B1ARW4	Q99LY9;B1ARW4	NADH dehydrogenase [ubiquinone] iron-sulfur protein 5	Ndufs5	-1.20851	0.471452	-1.04446	-1.10857		-0.586428	0.216486	0.420509	0.43957	7.0181e-17	1	8	1	9
B1ASK8;Q6P073;B0QZM1;B0QZM2	B1ASK8;Q6P073;B0QZM1	Ubiquitin-conjugating enzyme E2 J2	Ube2j2	-0.420237	#VALUE!	0.902468	1.10782		-0.198477	NaN	-0.355553	-0.397467	1.6816e-18	4	0	2	1
B1ASP2;P52332;E9QJS1;Q9R117	B1ASP2;P52332	Tyrosine-protein kinase;Tyrosine-protein kinase JAK1	Jak1	4.5281	4.33808	3.72107	3.4571	Up	2.23686	1.94418	-1.47907	-1.28469	0	20	29	51	41
Q9DCZ4;B1ASQ2;Q9D186	Q9DCZ4;B1ASQ2;Q9D186	Apolipoprotein O	Apoo	0.593222	0.475339	0.144269	-0.340541		0.300299	0.218223	-0.053329	0.14952	2.7843e-78	6	8	13	10
B1ASU9;O55047;O55047-2;O55047-3;B7ZC85;F6XSD0;D6RHM1;B7ZC84	B1ASU9;O55047;O55047-2;O55047-3	Serine/threonine-protein kinase tousled-like 2	Tlk2	-1.07682	#VALUE!	-1.04176	-1.63234		-0.521618	NaN	0.419431	0.637378	2.0165e-19	2	0	2	1
B1AT82;Q9D0M1;B1AT84;B1AT83	B1AT82;Q9D0M1;B1AT84	Phosphoribosyl pyrophosphate synthase-associated protein 1	Prpsap1	-0.422086	-0.0850417	0.79745	1.32544		-0.199388	-0.0321674	-0.313692	-0.479653	1.0322e-243	19	16	25	23
B1ATI0;B1AV77;P47740;P47739	B1ATI0;B1AV77;P47740	Aldehyde dehydrogenase;Fatty aldehyde dehydrogenase	Aldh3a2	1.31725	1.59542	2.1113	2.1192		0.656634	0.718701	-0.837403	-0.779422	6.3525e-58	4	16	9	7
Q80Y81;Q80Y81-2;B1ATP7;B1ATP9	Q80Y81;Q80Y81-2;B1ATP7	Zinc phosphodiesterase ELAC protein 2	Elac2	-0.165278	-0.16896	-0.231353	-0.0374672		-0.0729987	-0.0696638	0.0963969	0.0350609	2.4697e-190	26	7	28	17
Q3UMA3;Q99LI8;B1ATZ1;B1ATZ0;B1ATY9;F6VV02	Q3UMA3;Q99LI8;B1ATZ1;B1ATZ0;B1ATY9	Hepatocyte growth factor-regulated tyrosine kinase substrate	Hgs	-1.12875	-0.769982	-0.0739431	-0.0281344		-0.547173	-0.338214	0.033652	0.0315363	9.616e-87	22	11	15	16
B1AU74;Q9CWP6;Q9CWP6-3;Q9CWP6-2;Q9CWP6-4	B1AU74;Q9CWP6;Q9CWP6-3;Q9CWP6-2	Motile sperm domain-containing protein 2	Mospd2	3.5876	3.46319	4.11936	3.74021	Up	1.774	1.55326	-1.63783	-1.39161	5.0431e-22	4	2	10	7
B1AU75;Q99MD9;B1AU76;Q99MD9-2	B1AU75;Q99MD9;B1AU76	Nuclear autoantigenic sperm protein	Nasp	-3.88152	-3.78737	-1.58993	-2.87644	Down	-1.90196	-1.68645	0.637935	1.10722	0	60	46	54	42
B1AUN2;Q3UKV0;B1AUN3	B1AUN2;Q3UKV0;B1AUN3		Eif2b3	-1.04464	-1.12275	-1.3654	-0.806523		-0.505779	-0.495837	0.548437	0.325502	4.0381e-55	24	11	14	9
B1AUR6;G8JL47;B1AUR6-2;G3UXR9;G3UYM2	B1AUR6;G8JL47;B1AUR6-2;G3UXR9;G3UYM2	Protein MMS22-like	Mms22l	0.488041	1.03483	0.537428	0.368545		0.248535	0.468218	-0.210045	-0.118273	1.1576e-07	1	2	2	2
Q9QY36;B1AUY7;B1AUY8	Q9QY36;B1AUY7;B1AUY8	N-alpha-acetyltransferase 10	Naa10	0.0287124	-0.312561	0	0.178192		0.0224743	-0.133828	0.00417774	-0.0463847	4.9209e-51	10	3	28	6
Q78IK4;B1AV14	Q78IK4;B1AV14	Apolipoprotein O-like	Apool	0.474688	0.326524	-1.21585	-1.24007		0.241962	0.151729	0.488824	0.489235	7.8664e-27	9	2	4	2
B1AV75;Q3UJP5	B1AV75;Q3UJP5	Protein C8orf37 homolog	2610301B20Rik	-0.778969	-2.0207	0.19038	#VALUE!		-0.375029	-0.89706	-0.0717093	#VALUE!	1.5495e-09	3	1	4	0
Q9Z2C5;B1AW21;Q3UDN6	Q9Z2C5;B1AW21	Myotubularin	Mtm1	0.479146	#VALUE!	1.77738	-0.834165		0.244156	NaN	-0.7043	0.335941	4.3837e-10	3	0	5	2
B1AWD9;B1AWD8;O08585;B1AWE1;Q6PFA2;B1AWE0	B1AWD9;B1AWD8;O08585;B1AWE1;Q6PFA2;B1AWE0	Clathrin light chain A	Clta	0.0405213	0.244099	0.652182	0.553922		0.0282862	0.1149	-0.255787	-0.188282	0	13	22	13	16
B1AWL2;B1AWL5;B1AWL4	B1AWL2		Zfp462	-0.0512448	-0.464295	-0.802937	-0.118258		-0.0168769	-0.201626	0.324234	0.0655722	1.8496e-18	1	1	1	3
E9PV45;B1AY13;B1AY13-2	E9PV45;B1AY13	Ubiquitin carboxyl-terminal hydrolase;Ubiquitin carboxyl-terminal hydrolase 24	Usp24	-0.331545	-0.500739	-0.285117	-0.466223		-0.154827	-0.21791	0.117828	0.196985	4.524e-156	21	18	31	20
Q9Z0T9;B1AYG6;B1AYG7	Q9Z0T9;B1AYG6;B1AYG7	Integrin beta-6;Integrin beta	Itgb6	1.63036	1.87167	1.36673	1.42649		0.810731	0.842134	-0.54061	-0.517813	2.1534e-06	4	4	6	4
Q8C5N3;B1AYU7;Q8C5N3-2;B1AYU4;A2AK42;B1AYU8;J3QM48;J3QNR0;B1AYU9	Q8C5N3;B1AYU7;Q8C5N3-2;B1AYU4;A2AK42	Pre-mRNA-splicing factor CWC22 homolog	Cwc22;OTTMUSG00000013393	-1.33948	-0.67304	-1.61819	-1.55945		-0.650884	-0.294898	0.649202	0.60985	5.2603e-112	2	3	4	7
Q3UMF0;B1AZ14;Q3UMF0-2;B1AZ15;Q3UMF0-4;Q3UMF0-3;B1AZ26	Q3UMF0;B1AZ14;Q3UMF0-2;B1AZ15;Q3UMF0-4;Q3UMF0-3	Cordon-bleu protein-like 1	Cobll1	-0.888382	-0.274595	0.354328	-0.530991		-0.428877	-0.116864	-0.137061	0.221444	2.5519e-261	3	6	19	4
Q8BKX1;Q8BKX1-2;B1AZ46;Q8BKX1-3;Q8BKX1-4	Q8BKX1;Q8BKX1-2;B1AZ46;Q8BKX1-3;Q8BKX1-4	Brain-specific angiogenesis inhibitor 1-associated protein 2	Baiap2	0.250957	1.86572	0.383542	-0.189144		0.131853	0.839476	-0.148705	0.0923428	3.5577e-100	5	1	20	7
B1AZI6;Q8C690;F6SBF2;F6RBN0;F6VK25;B8A4C2;F6W2C7;B1AZI7;F6QCT0	B1AZI6	THO complex subunit 2	Thoc2	-0.200144	-0.342779	-0.582432	-0.71739		-0.0901578	-0.14733	0.23634	0.291839	8.2294e-63	25	10	19	12
B1B1A8;Q6PDN3;Q6PDN3-3;Q6PDN3-2	B1B1A8;Q6PDN3;Q6PDN3-3;Q6PDN3-2	Myosin light chain kinase, smooth muscle;Myosin light chain kinase, smooth muscle, deglutamylated form	Mylk	-0.565808	-0.787336	-0.655127	0.0496447		-0.270121	-0.345968	0.265317	0.00216241	3.2903e-05	4	1	3	2
Q9D773;B1B1D8;B1B1D7	Q9D773;B1B1D8	39S ribosomal protein L2, mitochondrial	Mrpl2	0.829799	#VALUE!	1.5559	2.1475		0.416732	NaN	-0.616017	-0.79011	2.4687e-83	6	0	6	1
Q505B7;B2KGA7;Q505B7-2;A8Y5E9;F7BCB7	Q505B7;B2KGA7;Q505B7-2;A8Y5E9	Protein archease	Zbtb8os	-0.0889756	-0.494962	0.303035	0.113494		-0.0354461	-0.215329	-0.116614	-0.0219508	3.3747e-19	4	2	5	7
B2KGF0;Q8VEE0	B2KGF0;Q8VEE0	Ribulose-phosphate 3-epimerase	Rpe	-0.802712	-1.40624	-0.225932	-1.12431		-0.386714	-0.62251	0.094236	0.445515	2.4102e-98	5	2	6	5
B2RQC6;E9QAI5;G3UWN2;B7ZN27;E9QAT6;Q8C196	B2RQC6;E9QAI5;G3UWN2;B7ZN27		Cad	-1.79891	-1.89625	-1.00695	-2.36265		-0.876996	-0.841456	0.405557	0.913186	0	200	249	279	201
B2RQS1;Q9ERG2	B2RQS1;Q9ERG2	Striatin-3	Strn3	-0.627719	-0.011759	-1.26884	-1.06779		-0.300591	0.000576886	0.509949	0.42417	4.3264e-300	18	1	14	16
B2RRE7;G3UXM1;G3UXQ0	B2RRE7	OTU domain-containing protein 4	Otud4	-2.12257	-1.89429	-1.74027	-1.72742		-1.03629	-0.840577	0.697863	0.673285	1.8776e-35	5	5	2	3
B2RRI2;Q689Z5-2;Q689Z5;Q7TNB8;Q7TNB8-2;Q7TNB8-3	B2RRI2;Q689Z5-2;Q689Z5	Protein strawberry notch homolog 1	Sbno1	-0.261856	-1.95328	-2.13156	-2.55375		-0.120529	-0.866936	0.853836	0.985355	6.6073e-62	3	8	14	1
Q6AW69;B2RSU6;Q6AW69-4;Q6AW69-5;D3Z3H4;Q6AW69-3	Q6AW69;B2RSU6;Q6AW69-4;Q6AW69-5;D3Z3H4;Q6AW69-3	Cingulin-like protein 1	Cgnl1	1.13267	0.000160815	0.398901	-0.101797		0.565792	0.00590291	-0.154827	0.0593554	8.7587e-301	3	8	14	8
B2RT41	B2RT41		Zfc3h1	#VALUE!	-0.713537	0.580979	-0.546034		NaN	-0.312993	-0.227405	0.227125	3.6426e-42	0	2	1	3
B2RUR8;D3Z210	B2RUR8		Otud7b	-3.13419	-1.29485	#VALUE!	-1.6348		-1.53416	-0.572737	#VALUE!	0.638306	9.6998e-09	2	1	0	1
B2RVL6	B2RVL6	Zinc finger CCHC domain-containing protein 24	Zcchc24	-0.648589	0.698641	1.88785	#VALUE!		-0.310862	0.317999	-0.748335	#VALUE!	1.1031e-17	3	2	3	0
B2RWS6;E9PYJ8	B2RWS6;E9PYJ8	Histone acetyltransferase p300	Ep300	-1.6595	-1.8471	-1.22666	-2.38652		-0.808387	-0.819496	0.493135	0.922198	1.7752e-101	2	1	10	5
B2RXC1;B2RXC1-2	B2RXC1	Trafficking protein particle complex subunit 11	Trappc11	0.46898	0.21595	0.69745	0.520985		0.239154	0.102322	-0.273831	-0.175843	2.3652e-45	9	12	13	12
B2RXC6	B2RXC6	DNA-directed RNA polymerase	Polr3a	-0.380081	-0.534146	-0.0965021	0.968742		-0.178714	-0.232837	0.0426443	-0.344941	4.6272e-18	3	4	7	2
B2RXS4;Q3UH93;Q9QZC2	B2RXS4	Plexin-B2	Plxnb2	1.3072	1.23198	1.1873	1.06176		0.651683	0.556307	-0.46909	-0.380071	1.9746e-250	52	61	70	52
B2RXW8	B2RXW8		Ppfia1	1.39994	1.19221	2.44569	1.78888		0.697329	0.538538	-0.970696	-0.654672	5.7949e-118	7	3	9	3
B2RXX4;Q6ZPE2;D6RG52;F7AWK3	B2RXX4;Q6ZPE2	Myotubularin-related protein 5	Sbf1	0.725866	0.320414	1.06558	0.997768		0.365581	0.148999	-0.420569	-0.355904	4.488e-34	3	8	16	7
B2RY04	B2RY04	Dedicator of cytokinesis protein 5	Dock5	-0.58407	-1.55184	-0.99491	-1.95976		-0.279109	-0.687567	0.400756	0.76103	4.4336e-78	7	4	15	4
B2RY56-2;B2RY56;B2RY56-3	B2RY56-2;B2RY56	RNA-binding protein 25	Rbm25	-1.6719	-1.58099	-1.90279	-1.69784		-0.814489	-0.700591	0.762646	0.662114	9.1311e-216	23	17	21	15
Q8BTM8;B7FAU9;B7FAV1;F6XC15;J3JS91;F6Z2C0;Q8BTM8-2;F7AVL7	Q8BTM8;B7FAU9;B7FAV1	Filamin-A	Flna	1.30589	1.30321	1.08452	1.29082		0.65104	0.588133	-0.428119	-0.466576	0	890	1059	1268	1206
B7ZCL8	B7ZCL8		Mpp1	1.91566	1.59856	1.6494	1.54334		0.95114	0.720103	-0.653287	-0.561941	9.7683e-97	14	12	15	12
J3QNK8;Q8CBW3;B7ZCU0;Q8CBW3-3;Q8CBW3-4;B7ZCU3;B7ZCU4;Q8CBW3-2;B7ZCU5;B7ZCU2;Q8CBW3-5	J3QNK8;Q8CBW3;B7ZCU0;Q8CBW3-3;Q8CBW3-4;B7ZCU3;B7ZCU4;Q8CBW3-2;B7ZCU5;B7ZCU2;Q8CBW3-5	Abl interactor 1	Abi1	-0.805819	#VALUE!	-0.382526	-0.377217		-0.388242	NaN	0.156655	0.16337	3.615e-28	6	0	11	3
B7ZMP1;B7ZMP1-2;E9Q1R1	B7ZMP1;B7ZMP1-2;E9Q1R1	Probable Xaa-Pro aminopeptidase 3	Xpnpep3	1.34943	0.738025	1.59208	1.73252		0.672471	0.335598	-0.630439	-0.63339	2.3686e-23	4	2	4	3
B7ZNL3	B7ZNL3		Tpm1	6.12043	4.66716	5.68268	0.308888	Up	3.02054	2.09123	-2.26098	-0.0957432	0	1	1	2	1
Q80TH2-2;B7ZNX6;Q80TH2;Q80TH2-1	Q80TH2-2;B7ZNX6;Q80TH2;Q80TH2-1	Protein LAP2	Erbb2ip	-0.103462	-1.7188	-3.19429	-5.24853		-0.0425756	-0.762167	1.27745	2.00306	2.5709e-31	2	2	3	1
Q65Z40;B7ZP47;F6YCH1	Q65Z40;B7ZP47	Wings apart-like protein homolog	Wapal	#VALUE!	-2.09644	-1.49257	-2.75519		NaN	-0.930903	0.599127	1.06143	2.7199e-24	0	6	5	2
Q6ZQ08-4;Q6ZQ08;Q6ZQ08-2;B7ZWL1;Q6ZQ08-3	Q6ZQ08-4;Q6ZQ08;Q6ZQ08-2;B7ZWL1	CCR4-NOT transcription complex subunit 1	Cnot1	-1.18004	-1.1922	-0.404538	-1.36009		-0.572415	-0.526868	0.16543	0.53456	0	72	67	85	73
B8ZXI1;B8ZXI1-2	B8ZXI1;B8ZXI1-2	Queuine tRNA-ribosyltransferase subunit QTRTD1	Qtrtd1	-1.83946	-1.31813	-1.15577	-0.996812		-0.896952	-0.583139	0.464877	0.397365	1.7189e-26	2	4	6	4
B9EJ54;E9Q880	B9EJ54		Nup205	0.164071	-0.405206	-0.186044	-0.753727		0.0890913	-0.175224	0.0783365	0.305562	0	94	94	144	108
B9EJ80	B9EJ80		Pdzd8	-0.0464441	#VALUE!	0.876397	-0.760521		-0.0145141	NaN	-0.345161	0.308128	1.9756e-50	5	0	1	1
B9EJR8	B9EJR8		Heatr2	-2.08982	-1.53706	-2.01744	-1.65829		-1.02016	-0.68096	0.808344	0.647176	6.7778e-28	8	4	7	4
B9EKS2;Q6ZPY7;Q6ZPY7-2	B9EKS2;Q6ZPY7;Q6ZPY7-2	Lysine-specific demethylase 3B	Kdm3b	-4.00514	-3.8745	-2.95147	-2.72948	Down	-1.9628	-1.72537	1.18066	1.05172	1.5607e-26	3	1	7	1
Q9D0N7;D3Z616;D3YTP6	Q9D0N7;D3Z616;D3YTP6	Chromatin assembly factor 1 subunit B	Chaf1b	-0.280141	#VALUE!	-0.301758	-0.661437		-0.129529	NaN	0.124461	0.270708	6.0934e-05	2	0	2	1
D3YTQ3;F6VQH5;Q9Z130	D3YTQ3;F6VQH5;Q9Z130	Heterogeneous nuclear ribonucleoprotein D-like	Hnrpdl	1.80614	1.67105	0.84855	1.01614		0.89724	0.752492	-0.334062	-0.362844	1.0208e-60	4	2	3	4
Q9Z2D8;D3YTR4;D3YTR5;Q9Z2D8-2;F6WZH1;Q9Z2E1;F6UPR7	Q9Z2D8;D3YTR4;D3YTR5;Q9Z2D8-2;F6WZH1	Methyl-CpG-binding domain protein 3	Mbd3	-1.3826	-1.06544	-2.22916	-1.6976		-0.672106	-0.470229	0.892741	0.662023	1.2653e-16	5	4	6	7
D3YTS1;D3Z569;Q9R0P6;D3YWT0	D3YTS1;D3Z569;Q9R0P6;D3YWT0	Signal peptidase complex catalytic subunit SEC11A	Sec11a	1.47631	1.59327	0.587043	0.445485		0.734915	0.717737	-0.229822	-0.14733	5.684e-86	8	20	36	21
Q3U0K8;Q3U0K8-3;D3YTU2;Q3U0K8-2	Q3U0K8;Q3U0K8-3;D3YTU2;Q3U0K8-2	2-oxoglutarate and iron-dependent oxygenase domain-containing protein 1	Ogfod1	-0.944519	-0.89588	-1.00859	-0.982863		-0.456504	-0.394468	0.40621	0.392098	1.7934e-177	5	5	10	5
Q9EPQ7;D3YU00	Q9EPQ7;D3YU00	StAR-related lipid transfer protein 5	Stard5	-4.39063	-2.94231	-3.81412	-2.8032	Down	-2.15252	-1.30886	1.52452	1.07957	2.1118e-07	2	3	2	3
Q8K2T1;D3YU12;G5E8S7;Q8K2T1-2;Q8K2T1-3	Q8K2T1;D3YU12;G5E8S7;Q8K2T1-2;Q8K2T1-3	NmrA-like family domain-containing protein 1	Nmral1	-0.16787	-0.460065	-0.547234	-0.370046		-0.074274	-0.199736	0.22231	0.160662	2.1472e-87	12	16	13	14
Q8VCM8;D3YU17	Q8VCM8;D3YU17	Nicalin	Ncln	1.82184	1.77292	1.55795	1.5513		0.904966	0.798009	-0.616835	-0.564948	3.3012e-82	29	24	33	27
Q9WU40-2;D3YU56;Q9WU40;E9QP59	Q9WU40-2;D3YU56;Q9WU40;E9QP59	Inner nuclear membrane protein Man1	Lemd3	1.52037	1.78071	2.19497	1.05426		0.756596	0.80149	-0.870757	-0.377238	1.3984e-10	5	3	4	4
Q9WVM3;D3YU58	Q9WVM3;D3YU58	Anaphase-promoting complex subunit 7	Anapc7	#VALUE!	0.962853	0.585302	-0.99768		NaN	0.436055	-0.229129	0.397693	7.3126e-33	0	2	10	1
P49025-5;D3YU89;E9QL53;P49025;D3Z1U0;P49025-4;F6SBR5;P49025-3	P49025-5;D3YU89;E9QL53;P49025;D3Z1U0;P49025-4;F6SBR5;P49025-3	Citron Rho-interacting kinase	Cit	-0.833145	1.03413	-1.95174	-1.04036		-0.401692	0.467905	0.782157	0.413811	2.227e-17	1	1	1	1
Q91YT0;D3YUM1;D3Z1U9;D3Z0K1;D3YXX5;D6RG60	Q91YT0;D3YUM1;D3Z1U9;D3Z0K1	NADH dehydrogenase [ubiquinone] flavoprotein 1, mitochondrial	Ndufv1	-0.0978216	0.26964	-0.758434	-0.698306		-0.0397997	0.126312	0.306496	0.284633	1.7414e-103	7	2	8	15
D3YUP1;Q9WVG6;Q9WVG6-2;D6RFA7	D3YUP1;Q9WVG6;Q9WVG6-2	Histone-arginine methyltransferase CARM1	Carm1	-0.869541	-0.758817	-0.611197	-0.484841		-0.419604	-0.333225	0.247806	0.204016	1.7446e-133	15	11	22	19
D3YUV1	D3YUV1		Nrbp1	-0.852652	-0.978631	-0.806692	-0.775302		-0.411291	-0.431442	0.325732	0.31371	1.7863e-193	12	9	15	17
Q8VBX6-3;Q8VBX6-4;D3YUX2;Q8VBX6;Q8VBX6-2;A3KG81;A3KG84;F7D0H8;A3KG80;A3KG82;Q8VBX6-5	Q8VBX6-3;Q8VBX6-4;D3YUX2;Q8VBX6;Q8VBX6-2;A3KG81	Multiple PDZ domain protein	Mpdz	-1.75833	-0.409474	#VALUE!	-1.95931		-0.857025	-0.177131	#VALUE!	0.76086	1.736e-102	1	4	0	1
Q9JJ78;D3YVF2	Q9JJ78;D3YVF2	Lymphokine-activated killer T-cell-originated protein kinase	Pbk	-1.43957	#VALUE!	-0.57628	-0.0812105		-0.700146	NaN	0.233888	0.0515809	3.8745e-36	2	0	3	2
Q9QY73;D3YVM2	Q9QY73;D3YVM2	Transmembrane protein 59	Tmem59	4.06611	5.5619	3.14078	5.38138	Up	2.00949	2.49101	-1.24777	-2.01141	1.1766e-22	1	2	3	5
D3YVN7;Q8BFR5;Q8BFR5-2	D3YVN7;Q8BFR5;Q8BFR5-2	Elongation factor Tu;Elongation factor Tu, mitochondrial	Gm9755;Tufm	1.29242	0.691119	1.72649	1.98893		0.64441	0.314639	-0.684016	-0.730225	1.8723e-297	49	42	57	35
D3YVW2;Q8BXA1;F6RUD1	D3YVW2;Q8BXA1	Golgi integral membrane protein 4	Golim4	3.53748	2.80543	3.20626	2.97311	Up	1.74932	1.25936	-1.27387	-1.10191	0	18	8	25	22
I1E4X5;Q8BWQ6;D3YW19;D3YW20;Q8BWQ6-3;Q8BWQ6-2;H3BJE8;F6RR19	I1E4X5;Q8BWQ6;D3YW19;D3YW20;Q8BWQ6-3	UPF0505 protein C16orf62 homolog	9030624J02Rik	0.848842	0.844732	1.36346	1.30563		0.426104	0.383276	-0.53931	-0.472169	1.0436e-85	21	7	24	20
D3YW41;Q6ZWZ4;D3Z3R1;D3Z7M8;P47964;D3YX71	D3YW41;Q6ZWZ4;D3Z3R1;D3Z7M8;P47964	60S ribosomal protein L36	Rpl36-ps3;Rpl36;Gm5745;Gm5614	-0.184614	-0.119963	-0.118572	-0.00150563		-0.0825147	-0.0477708	0.0514416	0.0214797	2.7616e-158	48	29	51	30
D3YW48	D3YW48		Capns1	-1.28684	-1.60237	-0.892589	-0.825379		-0.624977	-0.710142	0.359971	0.332622	0	55	50	91	55
D3YW52;Q61838	D3YW52;Q61838	Alpha-2-macroglobulin;Alpha-2-macroglobulin 165 kDa subunit;Alpha-2-macroglobulin 35 kDa subunit	Pzp;A2m	#VALUE!	-5.2625	11.0823	12.2454		NaN	-2.34556	-4.41331	-4.60367	2.7964e-08	0	2	4	5
Q8R1S0;D3YW66;D6RG57;F6ZE40	Q8R1S0;D3YW66;D6RG57;F6ZE40	Ubiquinone biosynthesis monooxygenase COQ6	Coq6	-0.410431	-1.32447	3.27367	-0.148075		-0.193651	-0.585973	-1.30073	0.0768328	3.2961e-05	10	2	4	4
D3YWJ4;Q8K2I1	D3YWJ4;Q8K2I1	Protein farnesyltransferase subunit beta	Fntb	-1.44806	-0.591683	-1.0856	-2.14027		-0.704324	-0.258546	0.436908	0.8292	3.4063e-13	1	5	5	3
Q9CRC9;D3YWR1;Q9CRC9-2;G3UXF5;D6RCJ1	Q9CRC9;D3YWR1;Q9CRC9-2;G3UXF5	Glucosamine-6-phosphate isomerase 2	Gnpda2	0.664944	0.609088	2.05311	2.19102		0.335598	0.277985	-0.81421	-0.806544	1.9756e-116	8	4	11	6
Q8K368;D3YX57;Q8K368-4;F7ALG5;Q8K368-2;F2Z414;D3YVC7	Q8K368;D3YX57;Q8K368-4;F7ALG5	Fanconi anemia group I protein homolog	Fanci	#VALUE!	-1.89509	-1.8685	-1.10941		NaN	-0.840939	0.748976	0.439889	3.0365e-32	0	9	11	5
Q9CXK4;D3YXA7	Q9CXK4;D3YXA7	Sugar transporter SWEET1	Slc50a1	#VALUE!	0.0318397	0.887448	0.907755		NaN	0.0200577	-0.349566	-0.32191	3.2826e-06	0	2	3	2
D3Z1Z1;Q3ULF4;D3YXB7;D3YZN4;D3Z342;G3UX97	D3Z1Z1;Q3ULF4;D3YXB7;D3YZN4	Paraplegin	Spg7	#VALUE!	0.399517	-1.45124	-0.906121		NaN	0.184344	0.582652	0.363115	2.7458e-10	0	2	2	4
Q91W82;D3YXD1;P52483;D3YW10;H3BL69;H3BL23;H3BKX9;B2FDH0;H3BJB5	Q91W82;D3YXD1;P52483;D3YW10;H3BL69;H3BL23;H3BKX9;B2FDH0	Ubiquitin-conjugating enzyme E2 E2;Ubiquitin-conjugating enzyme E2 E3	Ube2e2;Ube2e3	-1.81278	-2.55659	-1.43137	-1.5632		-0.883822	-1.13651	0.574731	0.611267	1.6277e-17	7	3	6	5
Q9D1G2;D3YXP6;Q9D1G2-2;Q9D1G2-3	Q9D1G2;D3YXP6;Q9D1G2-2	Phosphomevalonate kinase	Pmvk	-1.53458	-1.53592	-3.17874	-2.87218		-0.746906	-0.680452	1.27125	1.10561	9.3546e-89	16	19	29	29
Q9D945;Q9D945-2;D3YXW1	Q9D945;Q9D945-2;D3YXW1	Protein LLP homolog	Llph	-0.802214	0.0546846	-0.386743	-0.772842		-0.386468	0.0302654	0.158337	0.312781	4.4179e-33	4	2	10	4
D3YY09;Q9D6N5;F6T9K1	D3YY09;Q9D6N5;F6T9K1	Dr1-associated corepressor	Drap1	-1.05139	-1.4049	-0.838034	-1.18166		-0.509101	-0.62191	0.338225	0.467175	2.458e-28	3	11	12	10
Q8VDK1;Q8VDK1-2;D3YY53;D3Z3I3;D3Z2Y2	Q8VDK1;Q8VDK1-2;D3YY53;D3Z3I3;D3Z2Y2	Nitrilase homolog 1	Nit1	-1.67593	#VALUE!	-1.44228	-1.13131		-0.816469	NaN	0.579084	0.448161	1.0141e-10	1	0	4	2
Q8VDS8;Q8VDS8-3;D3YY98;Q8VDS8-2	Q8VDS8;Q8VDS8-3;D3YY98;Q8VDS8-2	Syntaxin-18	Stx18	-0.0556674	0.22226	0.017074	-0.456882		-0.0190534	0.105142	-0.00262808	0.193456	1.5655e-12	5	2	5	2
D3YYC3;O88974-4;G5E8N3;O88974;O88974-7;O88974-6;O88974-5;O88974-3;O88974-2	D3YYC3;O88974-4;G5E8N3;O88974;O88974-7	Histone-lysine N-methyltransferase SETDB1	Setdb1	-1.96578	#VALUE!	-1.87603	-2.05614		-0.959122	NaN	0.751978	0.797428	1.4552e-06	5	0	2	1
Q8R001;Q8R001-2;E9Q6X0;D3YYK8;Q3TG90	Q8R001;Q8R001-2;E9Q6X0;D3YYK8;Q3TG90	Microtubule-associated protein RP/EB family member 2	Mapre2	-0.173337	0.19755	0.827216	0.861245		-0.0769649	0.0941009	-0.325557	-0.304345	2.0919e-150	4	4	12	7
E9PVY0;Q3UU96;D3YYN8;H7BX44;Q3UU96-2;F6Q5A5;F6S5Z6;F6YZJ7;F6W0C2	E9PVY0;Q3UU96;D3YYN8;H7BX44;Q3UU96-2;F6Q5A5;F6S5Z6	Serine/threonine-protein kinase MRCK alpha	Cdc42bpa	0.764067	0.1494	1.88804	0.130599		0.384381	0.072586	-0.748408	-0.0284105	7.8088e-25	4	3	4	3
P15116;D3YYT0;P39038	P15116;D3YYT0	Cadherin-2	Cdh2	2.42386	2.86649	2.43599	2.60648		1.20126	1.28664	-0.966827	-0.963447	9.57e-74	13	9	12	3
D3YYT1;Q922P9	D3YYT1;Q922P9	Putative oxidoreductase GLYR1	Glyr1	#VALUE!	0.727005	-0.0961506	-0.829319		NaN	0.330673	0.0425042	0.33411	1.1925e-36	0	1	14	1
D3YYU8;F7AD47	D3YYU8;F7AD47		Obsl1	1.00848	-1.32452	0.117851	0.57645		0.504671	-0.585994	-0.0427986	-0.19679	1.3359e-41	7	13	7	3
Q9CY66;Q9CY66-2;Q9CY66-3;D3YZ09;F6SL78	Q9CY66;Q9CY66-2;Q9CY66-3;D3YZ09	H/ACA ribonucleoprotein complex subunit 1	Gar1	1.9359	1.97535	1.12443	1.62611		0.961105	0.888461	-0.444027	-0.593202	3.5052e-30	6	5	13	6
D3YZ61;Q9ES30	D3YZ61;Q9ES30	Complement C1q tumor necrosis factor-related protein 3	C1qtnf3	7.81393	9.40486	#VALUE!	2.78967	Up	3.854	4.20813	#VALUE!	-1.03262	2.2848e-07	2	2	0	2
D3Z4J3;Q99104;D3YZ62;F6TDE5;D6RFU0;B8JK05;F6Z2S4;D3Z135	D3Z4J3;Q99104;D3YZ62	Unconventional myosin-Va	Myo5a	-0.40156	-0.0370971	-0.334479	-0.353608		-0.189285	-0.0107447	0.137504	0.154454	5.0367e-85	14	26	18	29
F8WHD9;O88559;D3YZC2;O88559-2;F7CJP6	F8WHD9;O88559;D3YZC2;O88559-2;F7CJP6	Menin	Men1	2.86773	3.29588	3.41032	1.03515	Up	1.4197	1.47851	-1.3552	-0.370023	1.6041e-22	4	3	2	4
Q64213;Q64213-3;D3YZD0;D3YZC9;E9Q4Q2;Q64213-2;D3YVH4;F8WHF9;D6RDB7	Q64213;Q64213-3;D3YZD0;D3YZC9;E9Q4Q2;Q64213-2;D3YVH4	Splicing factor 1	Sf1	-1.60967	-1.33583	-1.48515	-1.30858		-0.783862	-0.591049	0.596172	0.515107	6.0089e-277	35	18	46	32
D3YZP9;F6SXB0	D3YZP9	Coiled-coil domain-containing protein 6	Ccdc6	0.961622	0.741351	1.42345	0.179929		0.481609	0.337083	-0.56322	-0.0470404	2.7725e-51	4	5	6	2
D3YZZ5;E9Q7G1	D3YZZ5;E9Q7G1		Tmed7	0.994191	1.12936	-0.772453	-0.29411		0.497638	0.510456	0.312084	0.131985	1.9907e-43	26	18	33	19
Q8C7R4;D3Z061	Q8C7R4;D3Z061	Ubiquitin-like modifier-activating enzyme 6	Uba6	-1.27313	-1.47355	-1.14632	-0.790639		-0.618229	-0.652584	0.461109	0.319502	0	61	53	64	60
O88545;D3Z0F5;F6QK86	O88545;D3Z0F5	COP9 signalosome complex subunit 6	Cops6	-0.724506	-1.03242	-0.93102	-0.909683		-0.348225	-0.455475	0.37529	0.36446	2.1628e-140	34	13	31	12
Q3UBX0;D3Z0I8;D3YX08;D3Z3Z2;D3Z7P2	Q3UBX0;D3Z0I8;D3YX08;D3Z3Z2;D3Z7P2	Transmembrane protein 109	Tmem109	1.38453	1.64584	1.01377	0.972819		0.689746	0.74123	-0.399921	-0.346481	2.934e-55	7	9	13	9
D3Z0M9	D3Z0M9		Ddx23	0.792451	0.675506	0.786176	0.35373		0.39835	0.307662	-0.309199	-0.112677	4.1764e-52	9	6	6	15
Q9Z1E4;D3Z0Q6	Q9Z1E4;D3Z0Q6	Glycogen [starch] synthase, muscle	Gys1	-0.907425	-1.5644	2.26454	2.16419		-0.438249	-0.693178	-0.898484	-0.796411	3.8781e-41	4	2	9	5
Q9ES28;Q9ES28-7;Q9ES28-2;Q9ES28-3;Q9ES28-4;Q9ES28-8;D3Z0V2;Q9ES28-5;Q9ES28-6;F6WMJ3;H3BJ53	Q9ES28;Q9ES28-7;Q9ES28-2;Q9ES28-3;Q9ES28-4;Q9ES28-8;D3Z0V2;Q9ES28-5;Q9ES28-6	Rho guanine nucleotide exchange factor 7	Arhgef7	-0.416102	-0.242023	-0.660544	-0.666818		-0.196442	-0.10231	0.267476	0.27274	5.3601e-265	4	7	15	9
D3Z0X5;Q6PDH0-2;D3Z4N0;Q6PDH0;E9PWB1;F6RUK9;F6RYD0;E9PWW4;E9Q307;E9Q340;F7B296;F7AWU3;D3YVQ3	D3Z0X5;Q6PDH0-2;D3Z4N0;Q6PDH0;E9PWB1;F6RUK9	Pleckstrin homology-like domain family B member 1	Phldb1	-2.96802	-2.34709	-0.839464	2.10186		-1.45237	-1.0429	0.338795	-0.772875	0	1	1	6	1
D3Z0Y8;Q9CQX0;F6SXD2	D3Z0Y8;Q9CQX0;F6SXD2	Ubiquitin thioesterase OTUB2	Otub2	-3.03832	-3.79903	-2.46279	-2.06163		-1.48697	-1.69166	0.985865	0.799502	7.8938e-10	2	1	1	1
Q62393;D3Z7X7;Q62393-2;D3Z125;D3Z637;F8WHQ1;Q62393-3;E9PUA7;D3Z2U2	Q62393;D3Z7X7;Q62393-2;D3Z125;D3Z637;F8WHQ1;Q62393-3;E9PUA7	Tumor protein D52	Tpd52	-1.15076	-0.982769	0.180238	0.146449		-0.558007	-0.433292	-0.0676666	-0.0343967	4.6077e-45	4	5	9	6
Q9D273;D3Z1G7;Q9D273-2	Q9D273;D3Z1G7;Q9D273-2	Cob(I)yrinic acid a,c-diamide adenosyltransferase, mitochondrial	Mmab	2.3793	1.63888	0.381937	1.23267		1.17932	0.738119	-0.148065	-0.444616	2.575e-06	1	2	1	1
E9PVA6;Q9JLQ2;D3Z1I2;J3QK07;Q80XR8;F7BIK4;F6WV69;F6U8T2	E9PVA6;Q9JLQ2;D3Z1I2;J3QK07;Q80XR8;F7BIK4;F6WV69	ARF GTPase-activating protein GIT2	Git2	#VALUE!	0.0369301	-0.18433	-0.540153		NaN	0.0223323	0.0776532	0.224905	7.0267e-11	0	4	5	4
P97496;Q3UNN4;P97496-2;D3Z1X8;Q3UZD0	P97496;Q3UNN4;P97496-2;D3Z1X8	SWI/SNF complex subunit SMARCC1	Smarcc1	-2.88372	-2.7491	-2.7289	-2.68052	Down	-1.41089	-1.22253	1.09194	1.03323	0	29	27	24	26
G3UW67;Q9JIB0;D3Z237	G3UW67;Q9JIB0;D3Z237	Ran guanine nucleotide release factor	Gm4535;Rangrf;Gm10355	-0.790626	#VALUE!	0.741255	1.47381		-0.380765	NaN	-0.291292	-0.535687	0.00018333	2	0	2	2
D3Z285	D3Z285		Nfu1	1.32542	0.847205	0.917967	0.608545		0.660655	0.384381	-0.361732	-0.208911	1.5727e-113	2	3	5	1
O54916;E9Q632;D3Z2E3;F6R6F1;O54916-4;O54916-3;D6RIN6;F6YT69;O54916-2;B9EI38;A2AFI8;Q80XA6;B1AV20;F7AB82	O54916;E9Q632;D3Z2E3;F6R6F1;O54916-4;O54916-3	RalBP1-associated Eps domain-containing protein 1	Reps1	-2.33303	-0.510895	-0.311705	-0.846554		-1.13987	-0.222448	0.128425	0.340619	4.7561e-37	1	2	5	1
E9Q3L4;D3Z2E7	E9Q3L4;D3Z2E7		AI607873	-3.76342	-3.50343	-4.84004	#VALUE!	Down	-1.84384	-1.55958	1.93346	#VALUE!	1.1971e-44	2	1	2	0
Q99PU8-3;Q99PU8;Q99PU8-2;D3Z2J3;D3Z1G8;D3YXL7	Q99PU8-3;Q99PU8;Q99PU8-2;D3Z2J3	Putative ATP-dependent RNA helicase DHX30	Dhx30	-0.415934	0.306406	0.352778	0.354265		-0.19636	0.14274	-0.136442	-0.11288	1.0764e-76	1	14	27	22
D3Z2R5	D3Z2R5		Sepn1	2.47041	2.83057	2.23852	2.08877		1.22416	1.27059	-0.888114	-0.767929	8.3806e-97	1	3	6	7
Q61009;D3Z2V4;F7C5U2	Q61009;D3Z2V4	Scavenger receptor class B member 1	Scarb1	1.28396	0.967146	0.640017	0.537116		0.640251	0.437973	-0.250938	-0.181935	6.57e-27	11	4	10	6
Q9D708;D3Z2Y6	Q9D708;D3Z2Y6		S100a16	8.42163	8.78934	11.9133	9.07133	Up	4.15308	3.9331	-4.74456	-3.40495	1.7751e-19	3	6	5	6
F8WIA1;D3Z2Z1;Q922J3;Q922J3-2;D3Z3M7;F6RCU2;Q8C0S5;F6RAY2	F8WIA1;D3Z2Z1;Q922J3;Q922J3-2;D3Z3M7;F6RCU2;Q8C0S5	CAP-Gly domain-containing linker protein 1	Clip1	0.693607	1.18509	1.86138	1.09812		0.349705	0.535356	-0.737783	-0.393804	0	37	24	34	34
Q921C5-2;Q921C5;D3Z390;Q921C5-3	Q921C5-2;Q921C5;D3Z390	Protein bicaudal D homolog 2	Bicd2	1.07649	#VALUE!	-0.060127	0.629133		0.538141	NaN	0.0281449	-0.216686	9.3094e-33	9	0	7	1
Q9DCL8;D3Z3A0	Q9DCL8;D3Z3A0	Protein phosphatase inhibitor 2	Ppp1r2	-2.06377	-2.14306	-0.156442	0.513827		-1.00735	-0.951736	0.066537	-0.17314	7.6996e-65	3	7	10	10
D3Z4V2;D3Z3F1;Q9D824;Q9D824-2;Q9D824-3;D3Z619;Q9D824-4	D3Z4V2;D3Z3F1;Q9D824;Q9D824-2;Q9D824-3;D3Z619;Q9D824-4	Pre-mRNA 3-end-processing factor FIP1	Fip1l1	-2.46956	-2.28796	-0.997102	-1.41715		-1.20706	-1.01648	0.40163	0.556111	1.5503e-206	8	5	3	3
Q9WUQ2;D3Z3S1;F6XLZ3	Q9WUQ2;D3Z3S1	Prolactin regulatory element-binding protein	Preb	-0.465012	-0.386883	-0.124156	-0.7562		-0.220513	-0.167037	0.0536674	0.306496	3.4497e-223	7	2	11	8
Q99N95;D3Z456;F6W7C7	Q99N95;D3Z456;F6W7C7	39S ribosomal protein L3, mitochondrial	Mrpl3	1.13604	0.377848	0.996054	0.352324		0.567448	0.174662	-0.392857	-0.112147	5.8567e-44	5	2	11	1
D3Z4B2;Q9CWZ7	D3Z4B2;Q9CWZ7	Gamma-soluble NSF attachment protein	Napg	0.23755	#VALUE!	0.00324948	-0.225519		0.125254	NaN	0.00288247	0.10608	2.0492e-240	11	0	15	3
Q8BTY8;D3Z4T4;Q8BTY8-2;Q8BTY8-3;Q8BTY8-4	Q8BTY8;D3Z4T4;Q8BTY8-2;Q8BTY8-3	Sec1 family domain-containing protein 2	Scfd2	1.30253	1.23395	1.08871	1.29171		0.649386	0.55719	-0.42979	-0.466915	2.2418e-134	14	4	13	10
D3Z4U0;D3Z4T9;Q9R020;E9PUD0;Q9R020-2	D3Z4U0;D3Z4T9;Q9R020;E9PUD0;Q9R020-2	Zinc finger Ran-binding domain-containing protein 2	Zranb2	-1.63812	-1.96437	-1.24103	-0.714268		-0.797864	-0.871891	0.498864	0.29066	1.4584e-165	7	7	11	2
P56542;D3Z512	P56542;D3Z512	Deoxyribonuclease-2-alpha	Dnase2;Dnase2a	-0.170803	-1.62798	-0.408409	0.285324		-0.0757176	-0.721587	0.166972	-0.0868444	6.5954e-08	2	4	4	3
D3Z5F7;P70345;P70345-2	D3Z5F7		Gm20521	-1.69774	#VALUE!	-1.25331	-0.549296		-0.827205	NaN	0.503756	0.228357	9.089e-31	1	0	8	4
D3Z5I1;Q3UPF5;Q3UPF5-2;G3X9X5	D3Z5I1;Q3UPF5;Q3UPF5-2;G3X9X5	Zinc finger CCCH-type antiviral protein 1	Zc3hav1	-1.492	-0.210429	-1.00449	-1.31392		-0.725947	-0.0881934	0.404576	0.517124	0	13	17	14	13
O09012;D3Z600;O09012-2	O09012;D3Z600;O09012-2	Peroxisomal targeting signal 1 receptor	Pex5	-0.47699	#VALUE!	-0.271417	-1.20975		-0.226409	NaN	0.112367	0.477781	4.1505e-109	7	0	14	5
Q9QZ88;D3Z645;Q9QZ88-2;D3YW98	Q9QZ88;D3Z645;Q9QZ88-2;D3YW98	Vacuolar protein sorting-associated protein 29	Vps29	0.525798	0.604024	0.85193	0.917939		0.267116	0.275722	-0.335408	-0.325756	4.3304e-193	25	37	35	29
D3Z656;Q8CHC4;F7BQW7;E9Q7S0;D3Z1M7;F7CD11;F6VSS8;F6XIX0	D3Z656;Q8CHC4;F7BQW7;E9Q7S0	Synaptojanin-1	Synj1	-1.38723	-3.50238	-1.08507	-2.37743		-0.674383	-1.55911	0.436695	0.918768	1.0017e-89	5	1	1	1
Q9CWY4;D3Z684	Q9CWY4;D3Z684	Gem-associated protein 7	Gemin7	-1.14507	-0.86681	#VALUE!	-0.475878		-0.555206	-0.381479	#VALUE!	0.20063	2.5417e-06	1	2	0	1
D3Z6C3;P97351;D3Z7W7	D3Z6C3;P97351;D3Z7W7	40S ribosomal protein S3a	Gm10119;Rps3a;Gm9000	0.114041	0.068252	0.153331	0.0671928		0.064469	0.0363276	-0.0569413	-0.00446481	0	73	78	117	78
Q6PER3;D3Z6G3;D3YUY6	Q6PER3;D3Z6G3;D3YUY6	Microtubule-associated protein RP/EB family member 3	Mapre3	0.207836	0.706917	1.06349	0.406339		0.11063	0.321697	-0.419739	-0.132546	2.2338e-23	1	4	6	1
Q9WUB4;D3Z6H3;D3Z4E5;F6XWI6;D3Z6A1	Q9WUB4;D3Z6H3;D3Z4E5	Dynactin subunit 6	Dctn6	0.808641	0.0464538	0.572808	0.907088		0.406319	0.0265876	-0.224149	-0.321658	4.1789e-16	5	3	14	3
Q921W4;D3Z6I4;D3YZD6;Q921W4-2;F7BGV1	Q921W4;D3Z6I4;D3YZD6;Q921W4-2;F7BGV1	Quinone oxidoreductase-like protein 1	Cryzl1	-2.55778	-2.06898	-1.89489	-1.57593		-1.25047	-0.918633	0.759497	0.616075	2.9857e-73	15	4	11	6
Q6SKR2;D3Z6J0;E9PXT7;Q6PRU9	Q6SKR2;D3Z6J0;E9PXT7;Q6PRU9		N6amt1	0.983584	0.00626493	1.39203	1.23948		0.492417	0.00863037	-0.550697	-0.44719	6.3621e-13	2	1	3	8
Q8BM55;D3Z6S1;Q8BM55-2;Q8BM55-3	Q8BM55;D3Z6S1	Transmembrane protein 214	Tmem214	0.516037	0.734697	-0.628833	-0.216636		0.262313	0.334111	0.254836	0.102725	6.0536e-73	18	8	22	11
D3Z780;Q61749-2;Q61749;F7CPG6	D3Z780;Q61749-2;Q61749	Translation initiation factor eIF-2B subunit delta	Eif2b4	-1.60836	-1.29672	-1.59527	-1.40258		-0.783216	-0.573574	0.640066	0.550605	1.0563e-178	17	5	25	22
P31750;D3Z783;D3YXX3;D3YYP9	P31750;D3Z783;D3YXX3	RAC-alpha serine/threonine-protein kinase	Akt1	-0.756663	-0.660625	-1.49328	-1.67095		-0.364051	-0.289351	0.599413	0.651959	1.4121e-64	7	6	16	4
P61957;D3Z794;H7BWX9	P61957;D3Z794;H7BWX9	Small ubiquitin-related modifier 2	Sumo2	0.015696	0.122886	-0.146059	0.0150905		0.0160683	0.0607391	0.062398	0.0152121	1.0754e-62	4	4	3	5
D3Z7B5;Q8BWY9;D6RGL3	D3Z7B5;Q8BWY9	Protein CIP2A	C330027C09Rik;Kiaa1524	-0.605133	#VALUE!	-1.17721	-1.19408		-0.289475	NaN	0.473423	0.471864	1.1959e-120	16	0	32	21
D3Z7D5	D3Z7D5		Col6a2	1.25827	2.999	2.3458	#VALUE!		0.627607	1.34585	-0.930875	#VALUE!	0	2	1	3	0
O35381;D3Z7M9;D3YYE1;F6UFG6;Q64G17	O35381;D3Z7M9;D3YYE1;F6UFG6	Acidic leucine-rich nuclear phosphoprotein 32 family member A	Anp32a	-1.51395	-1.57046	-1.52042	-1.60474		-0.736749	-0.695886	0.610228	0.626953	0	35	33	36	28
D3Z7P0;Q8K3W0;Q8K3W0-1;E9Q0U3;Q8K3W0-5;Q8K3W0-6;Q8K3W0-4;E9Q8Q1	D3Z7P0;Q8K3W0;Q8K3W0-1;E9Q0U3;Q8K3W0-5	BRCA1-A complex subunit BRE	Bre	-0.985878	-0.508522	0.135904	-0.641435		-0.47686	-0.221388	-0.0499946	0.263155	5.5398e-47	5	4	10	4
D3Z7P3;D3Z7P4;F7B327	D3Z7P3;D3Z7P4	Glutaminase kidney isoform, mitochondrial	Gls	0.907378	0.619721	2.10936	1.35748		0.454913	0.282736	-0.83663	-0.491754	0	5	4	5	4
D3Z7P3-2;F6RDM4	D3Z7P3-2			-0.126498	0.523002	0.738244	0.62554		-0.053913	0.23952	-0.290092	-0.215329	0	75	49	98	75
Q9CQ89;D5MCW4;Q9CQ89-3	Q9CQ89;D5MCW4;Q9CQ89-3	Protein CutA	Cuta	0.0238022	-0.0970154	-0.0799492	-0.234736		0.0200577	-0.0375176	0.0360461	0.109561	1.0923e-26	2	4	2	4
Q9D8V7;D6RFV4;D3Z5H3	Q9D8V7;D6RFV4;D3Z5H3	Signal peptidase complex catalytic subunit SEC11C	Sec11c	3.86935	3.51288	2.81683	1.21969	Up	1.91265	1.57546	-1.11863	-0.439716	6.3132e-07	2	1	2	1
Q8C4C9;Q9QYI4;D6RHR9	Q8C4C9;Q9QYI4;D6RHR9	DnaJ homolog subfamily B member 12	Dnajb12	0.831556	0.568895	0.147313	-0.340885		0.417596	0.260026	-0.0545422	0.14965	2.7395e-104	4	1	8	1
E0CX20;Q6PGH1	E0CX20;Q6PGH1	Protein BUD31 homolog	Bud31	-1.23775	-1.50671	-1.56589	-1.54842		-0.600818	-0.667401	0.628354	0.605684	1.8834e-56	14	19	34	29
Q923B0;E0CX39;E0CZ04;Q923B0-2;H3BKQ5	Q923B0;E0CX39;E0CZ04;Q923B0-2	Gamma-glutamylaminecyclotransferase	A2ld1	#VALUE!	0.323035	0.632744	0.696442		NaN	0.15017	-0.248039	-0.242106	8.289e-27	0	2	17	3
Q9D2C7;E0CX98;E0CXR0;E0CZE8	Q9D2C7;E0CX98;E0CXR0;E0CZE8	Bax inhibitor 1	Tmbim6	2.93874	2.21835	3.09595	2.56212	Up	1.45465	0.997039	-1.22989	-0.946694	4.3405e-06	7	6	8	9
E0CXB9;Q61301;Q61301-3;Q61301-2;Q8BS72	E0CXB9;Q61301;Q61301-3;Q61301-2	Catenin alpha-2	Ctnna2	0.615514	0.778708	-0.172306	0.0219005		0.311271	0.353775	0.0728604	0.0126402	0	6	2	8	7
E0CYA9;Q9CQ36	E0CYA9;Q9CQ36	DNA polymerase epsilon subunit 4	Pole4	-1.3481	-1.01207	-1.18242	-1.0306		-0.655126	-0.446384	0.4755	0.410124	1.3743e-94	2	1	9	2
F7DEU6;P50096;E0CYE2;E0CXK0;F6XXH9	F7DEU6;P50096;E0CYE2	Inosine-5-monophosphate dehydrogenase;Inosine-5-monophosphate dehydrogenase 1	Impdh1	-1.30716	-1.34343	-2.89191	-2.7656		-0.634979	-0.594443	1.15691	1.06537	1.623e-65	9	8	7	9
Q8C6G8;E0CYH4;F8WH48;F7DFQ2	Q8C6G8;E0CYH4	WD repeat-containing protein 26	Wdr26	-0.313553	#VALUE!	-0.633683	1.42195		-0.145972	NaN	0.256769	-0.516099	1.1065e-26	2	0	5	2
E0CYH7;E0CYM1;Q6P6L0;Q6P6L0-3	E0CYH7;E0CYM1;Q6P6L0;Q6P6L0-3	Filamin A-interacting protein 1-like	Filip1l	-2.77749	#VALUE!	-2.99432	-0.808049		-1.3586	NaN	1.19774	0.326077	1.1111e-145	3	0	10	2
E0CYQ0;E0CYD2;F6SYN4;E0CZ97;F7B6A4;F7C1U0	E0CYQ0;E0CYD2;F6SYN4;E0CZ97;F7B6A4;F7C1U0		Kctd17	3.27894	2.77876	3.92155	3.6479	Up	1.62209	1.24744	-1.55898	-1.35675	4.9625e-34	3	8	12	6
E0CYV0;E9PWE0;F7D432;P23506-2;P23506;F6V9F1;F6TXE3	E0CYV0;E9PWE0;F7D432;P23506-2;P23506;F6V9F1	Protein-L-isoaspartate O-methyltransferase;Protein-L-isoaspartate(D-aspartate) O-methyltransferase	Pcmt1	0.253899	0.0334312	0.489847	0.662258		0.1333	0.0207689	-0.19108	-0.229196	0	23	27	39	23
Q9D291;Q8BIB9;E0CYV4	Q9D291;Q8BIB9;E0CYV4	Desumoylating isopeptidase 2	Pppde1	1.7737	#VALUE!	1.9367	0.725288		0.881273	NaN	-0.767806	-0.252999	2.1567e-16	1	0	5	3
E0CZ22;G3XA21;D3Z624	E0CZ22;G3XA21;D3Z624		Heatr7a	-1.19665	-1.44098	0.271854	0.228584		-0.58059	-0.63803	-0.104186	-0.0654156	1.1218e-76	8	18	23	26
Q8CIV8;E0CZ81;E0CXJ6	Q8CIV8;E0CZ81	Tubulin-specific chaperone E	Tbce	-0.371864	#VALUE!	-1.11304	-0.169025		-0.17467	NaN	0.447844	0.0847446	2.3465e-07	1	0	1	1
Q8VBW6;E0CZE0	Q8VBW6;E0CZE0	NEDD8-activating enzyme E1 regulatory subunit	Nae1	-0.377694	-0.262921	0.449908	0.521331		-0.177539	-0.111648	-0.175159	-0.175974	0	17	19	26	14
E2JF22;E9PUQ9;F7AC58;F6PYU5;F6QY99	E2JF22;E9PUQ9;F7AC58	Piezo-type mechanosensitive ion channel component 1	Piezo1;Fam38a	1.24115	1.26497	0.855858	0.996838		0.619178	0.571046	-0.336974	-0.355553	4.0378e-58	8	13	15	14
Q91X20;E9PU93;D3YYA0;D6RI55;D6RET1	Q91X20;E9PU93;D3YYA0	Set1/Ash2 histone methyltransferase complex subunit ASH2	Ash2l	-0.0491398	-0.188878	-0.376352	-0.209514		-0.0158409	-0.0785636	0.154194	0.100036	1.6027e-63	9	5	4	3
E9PU96;Q571H0	E9PU96;Q571H0	Nucleolar pre-ribosomal-associated protein 1	Urb1	#VALUE!	0.733417	-0.104224	-0.6443		NaN	0.333538	0.0457225	0.264236	4.7154e-16	0	2	5	5
Q5BLK4;E9PUA2	Q5BLK4;E9PUA2	Terminal uridylyltransferase 7	Zcchc6	-1.33033	2.07107	-1.68745	-1.53156		-0.646383	0.931229	0.676809	0.599318	6.5634e-20	4	1	2	3
Q9QWT9;E9PUA5;Q9QWT9-2;Q9QWT9-3;G3UXN2	Q9QWT9;E9PUA5;Q9QWT9-2;Q9QWT9-3	Kinesin-like protein KIFC1	Kifc1;Kifc5b	-0.957499	#VALUE!	-0.216086	-0.973246		-0.462893	NaN	0.0903114	0.388465	4.7024e-12	5	0	1	1
E9PUB7;Q2YDW2;D3YX87;Q2YDW2-2	E9PUB7;Q2YDW2;D3YX87;Q2YDW2-2	Protein misato homolog 1	Msto1	-0.575299	-1.0459	-0.0448323	-0.575619		-0.274791	-0.461502	0.0220482	0.238298	1.0637e-23	8	1	2	4
Q61210-5;E9PUF7;Q61210;Q61210-2;Q61210-4;Q61210-3;F6ZN61;D3YVJ9	Q61210-5;E9PUF7;Q61210;Q61210-2;Q61210-4;Q61210-3;F6ZN61	Rho guanine nucleotide exchange factor 1	Arhgef1	-0.711736	-0.760363	-0.142244	-0.238983		-0.341939	-0.333916	0.0608775	0.111165	2.652e-118	14	4	29	26
E9PUH7;D3YZ00;B1AUB6;A2ADI3;Q02780-5;B1AUB8	E9PUH7;D3YZ00	Nuclear factor 1	Nfix	0.230016	#VALUE!	1.57314	0.18783		0.121546	NaN	-0.622887	-0.0500245	1.7644e-113	3	0	6	2
E9PUM4;Q71LX4	E9PUM4;Q71LX4	Talin-2	Tln2	5.04861	6.5809	7.54132	5.57957	Up	2.49303	2.94632	-3.00185	-2.08626	0	2	15	33	26
E9PUQ5;Q921M4;Q921M4-2;A2AN46;A2AN45;A2AN48;A2AN44;A2AN42	E9PUQ5;Q921M4;Q921M4-2	Golgin subfamily A member 2	Golga2	1.18411	0.448304	-1.36515	-1.48922		0.591105	0.206143	0.548338	0.583327	6.4987e-181	35	33	43	37
E9PUQ7;Q3UYU2;Q8BNV1;F6ZHN3;F6SY41	E9PUQ7;Q3UYU2;Q8BNV1;F6ZHN3	tRNA (uracil-5-)-methyltransferase homolog A	Trmt2a	-1.0979	-1.10264	-1.92385	-1.45901		-0.53199	-0.486853	0.77104	0.57192	1.0258e-54	11	3	10	6
E9PYV1;E9PUR6;P06537-2;P06537;P06537-4;P06537-3;E9Q310;E9Q8A6;D3YTK8;D3Z280	E9PYV1;E9PUR6;P06537-2;P06537;P06537-4;P06537-3;E9Q310	Glucocorticoid receptor	Nr3c1	-3.15089	-0.494848	-0.0291146	#VALUE!		-1.54237	-0.215278	0.015783	#VALUE!	1.7131e-156	1	1	5	0
Q8K4R9;E9PUT4;Q8K4R9-2;Q8K4R9-3;E9QQ48	Q8K4R9;E9PUT4;Q8K4R9-2;Q8K4R9-3	Disks large-associated protein 5	Dlgap5	-2.50394	#VALUE!	-1.76296	-3.13787		-1.22398	NaN	0.706906	1.20596	2.7992e-15	1	0	1	1
E9PUU4	E9PUU4		Gemin5	-3.88272	-3.64557	-3.40949	-3.46904	Down	-1.90255	-1.62309	1.36323	1.33102	1.2597e-192	20	23	23	30
E9PV41;E9PXV7;O08808;D3Z074;Q6NS79	E9PV41;E9PXV7;O08808;D3Z074;Q6NS79	Protein diaphanous homolog 1	Diap1;Diaph1	-0.819201	-1.10287	-1.28305	-1.29197		-0.394828	-0.486954	0.515611	0.508834	7.9864e-257	29	44	69	41
E9PVA2;Q9DB85	E9PVA2;Q9DB85	Ribosomal RNA-processing protein 8	Rrp8	-1.69816	-1.3252	-0.699125	-2.32023		-0.82741	-0.586298	0.282855	0.897163	1.8264e-14	1	1	2	2
E9PVA8;Q8BIX2	E9PVA8		Gcn1l1	-1.13776	-0.632144	-0.488748	-0.84957		-0.551607	-0.276625	0.198997	0.341758	0	256	317	321	372
E9PVC5;E9Q770	E9PVC5		Eif4g1	-1.29889	-2.13751	-1.14158	-1.28821		-0.630908	-0.949255	0.459222	0.507414	0	219	183	246	226
E9PVG7;F8VPL5;P97820	E9PVG7;F8VPL5;P97820	Mitogen-activated protein kinase kinase kinase kinase 4	Map4k4	-1.75228	-1.01101	-0.985301	-1.23926		-0.854049	-0.445912	0.396927	0.488926	0	13	10	15	4
Q8R0J2;Q9R0Q9;F6XX36;Q5F2B1;E9PVP3;F6ZGG4	Q8R0J2;Q9R0Q9;F6XX36;Q5F2B1;E9PVP3;F6ZGG4	Mannose-P-dolichol utilization defect 1 protein	Mpdu1	0.576272	#VALUE!	0.936291	0.691205		0.291957	NaN	-0.369035	-0.240128	1.2465e-06	3	0	4	1
E9PVX6	E9PVX6		Mki67	-1.18698	-1.36751	-1.49973	#VALUE!		-0.57583	-0.605201	0.601982	#VALUE!	2.0889e-159	4	3	6	0
Q9JMD0;E9PW12;Q99LA2;Q8CCB2;B1AQG7	Q9JMD0;E9PW12;Q99LA2;Q8CCB2;B1AQG7		Zfp207	-1.3529	-1.42899	-0.531377	-1.27583		-0.657491	-0.632674	0.215989	0.502738	2.5842e-51	8	6	20	8
E9PW39;D3YVL0;P23249;D3YYR1	E9PW39;D3YVL0;P23249	Putative helicase MOV-10	Mov10	-2.47628	-2.55999	-2.57737	-2.31592		-1.21036	-1.13803	1.03154	0.895535	2.3398e-264	39	8	60	46
E9PWB2;E9Q3W1;Q8BK63;E9Q4G7;H7BXB1;F6YBC9	E9PWB2;E9Q3W1;Q8BK63;E9Q4G7;H7BXB1	Casein kinase I isoform alpha	Csnk1a1	-0.570798	-0.745706	-0.813328	-1.19215		-0.272576	-0.327367	0.328377	0.471135	1.1893e-188	17	8	22	10
Q61183;E9PZR3;E9PWC8;E9QAN2;Q61183-3;Q61183-4;Q61183-2;E9QAY4;A1L349;Q9WVP6;F6VTN8;F7CXD5;E9PVN7;E9Q5Z1;F7DC29	Q61183;E9PZR3;E9PWC8;E9QAN2;Q61183-3;Q61183-4;Q61183-2	Poly(A) polymerase alpha	Papola	-2.54533	-1.02737	-3.10267	-2.24127		-1.24434	-0.453222	1.24092	0.867343	5.7239e-58	10	1	7	2
E9PWE8;Q62188;Q3TT92;D3YUS0;D3Z567	E9PWE8;Q62188;Q3TT92	Dihydropyrimidinase-related protein 3	Dpysl3	-0.224302	-0.401417	-0.122412	-0.214145		-0.102047	-0.173531	0.0529723	0.101784	0	117	60	133	91
E9PWG2;E9PY51	E9PWG2;E9PY51		Trappc8	-0.411604	0.0628951	0.539104	0.516586		-0.194229	0.0339339	-0.210713	-0.174182	1.8297e-39	1	10	12	8
E9PWG6	E9PWG6		Ncapg	-1.31153	-1.36	-1.39497	-1.00435		-0.637132	-0.601847	0.560226	0.40021	0	53	42	55	37
Q8C8K1;P54761;E9PWK7	Q8C8K1;P54761;E9PWK7	Ephrin type-B receptor 4	Ephb4	1.94072	-0.615914	2.31378	1.99718		0.963474	-0.269373	-0.918115	-0.733339	4.2519e-47	8	1	5	2
E9PWQ3;D3YWD1	E9PWQ3;D3YWD1		Col6a3	4.18963	4.20727	2.16938	2.58939	Up	2.07029	1.88573	-0.860557	-0.956992	0	178	246	379	302
E9PWT1;E9QLK7;E9PZA7;F7CGG2;Q80YV3;D3YY11	E9PWT1;E9QLK7;E9PZA7;F7CGG2;Q80YV3	Transformation/transcription domain-associated protein	Trrap	0.2667	0.058161	-1.0423	-0.796451		0.139601	0.0318186	0.419647	0.321697	1.472e-126	11	19	47	16
E9Q4Y2;E9PWW9	E9Q4Y2;E9PWW9		Rsf1	#VALUE!	-1.75315	-5.02639	-2.29925		NaN	-0.777517	2.00773	0.88924	4.661e-221	0	1	1	1
Q811L6;E9QPR4;E9PWX8;E9Q1M8;Q811L6-2;E9Q4Q9;E9Q6G0;F7AIF3	Q811L6;E9QPR4;E9PWX8	Microtubule-associated serine/threonine-protein kinase 4	Mast4	0.0468385	0.237533	#VALUE!	-0.0172803		0.0313951	0.111966	#VALUE!	0.0274372	8.104e-36	1	1	0	1
Q8C0C7;E9PWY9;D6RIJ2	Q8C0C7;E9PWY9	Phenylalanine--tRNA ligase alpha subunit	Farsa	-0.719138	-0.704764	-0.802648	-0.704262		-0.345583	-0.309073	0.324119	0.286881	0	41	22	37	30
E9PX30;Q8BPM2;Q8BPM2-2;E9Q1T3	E9PX30;Q8BPM2;Q8BPM2-2;E9Q1T3	Mitogen-activated protein kinase kinase kinase kinase 5	Map4k5	-2.20531	-1.68991	-2.43048	-2.5054		-1.07701	-0.749257	0.972987	0.967095	9.7635e-115	3	1	14	7
E9QPR5;Q8K2V1;E9PX53;Q8K2V1-2;E0CXK8;F6TLH3;F6V294;F6U5N5	E9QPR5;Q8K2V1;E9PX53;Q8K2V1-2	Serine/threonine-protein phosphatase 4 regulatory subunit 1	Ppp4r1	-0.128568	-0.572389	0.706915	0.949719		-0.0549317	-0.249925	-0.277604	-0.337758	1.5603e-52	8	1	19	11
E9PX59;Q69Z37;D3Z7L1	E9PX59;Q69Z37	Sterile alpha motif domain-containing protein 9-like	Samd9l	-2.9323	-2.65298	-4.49723	-4.41712	Down	-1.43479	-1.17958	1.79681	1.68908	0	44	29	74	62
E9PX68;E9Q585;E9Q1Q0	E9PX68;E9Q585;E9Q1Q0		Slc4a1ap	-0.676576	#VALUE!	-0.486857	-0.570108		-0.324636	NaN	0.198243	0.236217	4.3293e-63	2	0	1	2
Q60847;Q60847-5;Q60847-2;E9PX70;Q60847-3;Q60847-4;J3KMS9;F6WIM8	Q60847;Q60847-5;Q60847-2;E9PX70;Q60847-3;Q60847-4;J3KMS9	Collagen alpha-1(XII) chain	Col12a1	4.55257	4.90667	-0.0380532	0.421402		2.2489	2.19824	0.019346	-0.138235	0	47	105	235	158
Q9CQ85;E9PXB9	Q9CQ85;E9PXB9	Mitochondrial import inner membrane translocase subunit Tim22	Timm22	-0.454407	#VALUE!	-2.26794	-2.19661		-0.215295	NaN	0.908198	0.850479	9.9963e-18	2	0	3	4
E9PXE5;E9Q9X1;Q91ZU6-4;Q91ZU6;E9QL23;Q91ZU6-2;Q91ZU6-5;Q91ZU6-8	E9PXE5;E9Q9X1;Q91ZU6-4;Q91ZU6;E9QL23;Q91ZU6-2	Dystonin	Dst	1.61881	1.3105	0.154198	0.723377		0.805045	0.591392	-0.0572866	-0.252277	0	88	74	205	106
E9PXY1;A2A432;A2A432-2;J3QJX0	E9PXY1;A2A432;A2A432-2;J3QJX0	Cullin-4B	Cul4b	-0.881878	-0.553784	-0.974564	-0.848665		-0.425676	-0.241612	0.392647	0.341417	4.1267e-156	50	35	67	50
E9PY55;F8VQL9;E9Q701;Q9WU42;E9Q9V3;Q9WU42-2;F6Z4B2;D3Z2J5;F6SK53;F6YAU7	E9PY55;F8VQL9;E9Q701;Q9WU42;E9Q9V3;Q9WU42-2;F6Z4B2;D3Z2J5	Nuclear receptor corepressor 2	Ncor2	-3.24379	0.801619	-3.05907	-3.05213	Down	-1.5881	0.364012	1.22355	1.17358	1.6386e-286	9	1	20	5
G5E8T9;Q99KB8;Q99KB8-2;E9PYA3;E9Q2H8;D3YWI0;D3YUX8	G5E8T9;Q99KB8;Q99KB8-2;E9PYA3;E9Q2H8	Hydroxyacylglutathione hydrolase, mitochondrial	Hagh	0.766985	0.34189	1.60747	1.5328		0.385818	0.158596	-0.636571	-0.557964	2.751e-23	8	3	15	8
E9PYB0	E9PYB0		Ahnak2	0.119362	-0.770676	-0.560551	0.174564		0.067088	-0.338524	0.227618	-0.0450145	0	4	2	7	2
E9PYF4;F6VG99;E9PYI7;F6TFN2;Q3UPW3;E0CZD8	E9PYF4;F6VG99;E9PYI7;F6TFN2		Lmo7	5.01757	#VALUE!	-9.81034	0.371159		2.47776	NaN	3.91466	-0.11926	1.631e-15	1	0	3	2
E9PYG6	E9PYG6		Rasa1	-3.19208	-3.28959	-2.34918	-2.38873		-1.56264	-1.46403	0.94058	0.923035	8.1498e-183	36	27	15	10
E9PYH0;G3XA35;E9QMK2	E9PYH0;G3XA35;E9QMK2		Vcan	#VALUE!	-0.643232	-0.532312	-1.93874		NaN	-0.281579	0.216362	0.753091	0	0	3	2	1
E9PYL2	E9PYL2		Prr12	1.00848	-1.31915	#VALUE!	-1.71734		0.504671	-0.583593	#VALUE!	0.66948	6.2958e-16	1	2	0	2
E9PYT0;P97393	E9PYT0;P97393	Rho GTPase-activating protein 5	Arhgap5	-2.02264	-3.09329	-1.85534	-1.83512		-0.987102	-1.37632	0.74373	0.71396	2.3621e-177	10	3	20	12
Q8BFQ1;E9PZ00;J3QPG5;Q61207;K3W4L3	Q8BFQ1;E9PZ00;J3QPG5;Q61207;K3W4L3	Sulfated glycoprotein 1	Psap	1.53439	1.94732	0.310771	1.11366		0.763497	0.875937	-0.119699	-0.399673	2.3285e-149	21	36	32	56
E9PZ16;B1B0C7	E9PZ16;B1B0C7		Hspg2	1.34483	0.930232	0.428842	0.282081		0.670206	0.421479	-0.166762	-0.0856191	0	33	33	118	62
E9PZ21;Q91W59;Q91W59-3;Q91W59-2;Q8BWL5;Q8BWL5-2;Q8BWL5-3;Q8BWL5-6;Q8BWL5-4;G3UZJ9	E9PZ21;Q91W59;Q91W59-3;Q91W59-2;Q8BWL5;Q8BWL5-2;Q8BWL5-3;Q8BWL5-6;Q8BWL5-4;G3UZJ9	RNA-binding motif, single-stranded-interacting protein 1;RNA-binding motif, single-stranded-interacting protein 3	Rbms1;Rbms3	1.26377	#VALUE!	-0.999293	1.46253		0.630312	NaN	0.402504	-0.531427	4.6022e-108	2	0	5	2
Q3TPX4;E9PZ92;E0CYX2	Q3TPX4;E9PZ92;E0CYX2	Exocyst complex component 5	Exoc5	0.472953	0.646154	1.11302	1.18565		0.241108	0.294547	-0.439481	-0.426858	3.8306e-14	1	2	8	2
E9PZB3	E9PZB3		Gm5093	#VALUE!	0.17265	-0.0262493	-0.0815791		NaN	0.0829751	0.014641	0.0517201	0	0	1	19	4
Q3TN34;E9PZD2	Q3TN34;E9PZD2		Micall2	0.528476	#VALUE!	-1.72977	-1.16421		0.268434	NaN	0.693677	0.460585	6.537e-46	1	0	4	1
E9PZF0	E9PZF0	Nucleoside diphosphate kinase	Gm20390	0.161314	0.362077	0.655035	0.814499		0.0877344	0.167615	-0.256924	-0.286691	0	43	124	116	111
E9PZJ8;E9PZJ8-2	E9PZJ8;E9PZJ8-2	Activating signal cointegrator 1 complex subunit 3	Ascc3	-2.18381	-1.2866	-1.64326	-1.89451		-1.06643	-0.569051	0.659194	0.736388	1.0139e-139	32	26	36	28
G3X8V8;E9PZP3;Q9QZL0	G3X8V8;E9PZP3;Q9QZL0	Receptor-interacting serine/threonine-protein kinase 3	Ripk3	-6.54983	#VALUE!	-8.54652	-5.98475	Down	-3.21518	NaN	3.41088	2.2811	1.75e-32	5	0	5	3
E9PZP8;F6RXM1	E9PZP8		Herc1	-1.84651	-1.81558	-1.60779	-1.23626		-0.900422	-0.805409	0.645056	0.487795	2.6508e-38	3	7	13	4
E9Q035;P47758	E9Q035;P47758	Signal recognition particle receptor subunit beta	Gm20425;Srprb	2.16841	2.0454	1.96652	1.8729		1.07553	0.91976	-0.779695	-0.686406	0	29	38	39	51
G3X9Q6;Q8BWW4;E9Q066	G3X9Q6;Q8BWW4;E9Q066	La-related protein 4	Larp4	-0.203859	-1.75853	0.569218	0.876513		-0.0919865	-0.779918	-0.222717	-0.31011	4.9561e-299	12	3	11	7
E9Q070;D3YVM5	E9Q070;D3YVM5		Gm8730;Rplp0	0.0525696	-0.497023	-0.474531	-0.659539		0.0342158	-0.21625	0.19333	0.269991	0	6	5	4	4
E9Q0A7;Q4KMM3;Q4KMM3-4;Q4KMM3-2;Q4KMM3-3;B1H3M0	E9Q0A7;Q4KMM3;Q4KMM3-4;Q4KMM3-2;Q4KMM3-3	Oxidation resistance protein 1	Oxr1	-1.35952	#VALUE!	-0.481807	-0.708016		-0.660749	NaN	0.196229	0.2883	7.6942e-57	2	0	8	6
E9Q0N0;Q9Z0R4;E9Q3I5;Q9Z0R4-2;E9Q3I4;E9Q3I9;E9Q3I8;Q6NZJ5;CON__ENSEMBL:ENSBTAP00000001528;D3Z6P4;F6ZLP6;F6R6C8;Q6J1S9	E9Q0N0;Q9Z0R4;E9Q3I5;Q9Z0R4-2;E9Q3I4;E9Q3I9;E9Q3I8;Q6NZJ5	Intersectin-1	Itsn1	0.344946	-0.0217148	0.692334	1.6142		0.178109	-0.00387162	-0.271792	-0.588704	0	9	18	25	7
E9Q0Y4;P46062	E9Q0Y4;P46062	Signal-induced proliferation-associated protein 1	Sipa1	#VALUE!	-2.2709	-2.14476	-1.53736		NaN	-1.00886	0.859095	0.601506	4.9068e-15	0	4	3	1
E9Q137;Q3TXY2	E9Q137;Q3TXY2		Tex264	2.28244	2.68353	3.43791	3.12696	Up	1.13166	1.20489	-1.36621	-1.16001	1.1357e-44	7	2	5	5
E9Q156;Q9EP82	E9Q156;Q9EP82	tRNA (guanine-N(7)-)-methyltransferase subunit WDR4	Wdr4	-0.60775	-0.19608	0.0404643	#VALUE!		-0.290762	-0.0817817	-0.0119517	#VALUE!	1.9301e-28	1	2	7	0
Q8C5Q4;E9Q179	Q8C5Q4;E9Q179	G-rich sequence factor 1	Grsf1	0.177269	-0.152837	-0.17265	-0.544074		0.095587	-0.0624598	0.0729976	0.226385	8.8762e-33	6	5	8	8
E9Q199;Q8R2Y9;E9PV68;E9Q1I2;E9PW70;E9Q2V9	E9Q199;Q8R2Y9;E9PV68;E9Q1I2;E9PW70;E9Q2V9	SOSS complex subunit B1	Obfc2b	-0.782393	#VALUE!	1.05035	0.519388		-0.376714	NaN	-0.414499	-0.17524	3.0099e-08	1	0	1	1
E9Q1G8;E9Q9F5;O55131;E9QMM2;Q9DA97	E9Q1G8;E9Q9F5;O55131	Septin-7	2007-09-01	0.970009	0.982364	1.22983	1.37806		0.485736	0.444773	-0.486044	-0.499524	0	85	123	75	73
E9Q1P8	E9Q1P8		Irf2bp2	-1.44491	#VALUE!	-0.285117	-0.963602		-0.702773	NaN	0.117828	0.384823	0	7	0	5	1
E9Q1T1;Q6PHZ2;E9Q1V9;Q6PHZ2-5;Q6PHZ2-4;E9Q1W0;Q6PHZ2-2;E9PXV3;Q8CCM0;Q5SVJ0;Q5SVI1;Q68EG2;P28652;Q5SVI2;Q5SVI0;Q5SVI3;Q5SVJ1;Q5SVI9;F6ZIE1;F8WIS9;P11798;F7A856;F6RWZ9;D6RDQ8;E9QAJ4;F6WHR9;E9PYZ8;D3Z7K9	E9Q1T1;Q6PHZ2;E9Q1V9;Q6PHZ2-5;Q6PHZ2-4;E9Q1W0;Q6PHZ2-2;E9PXV3;Q8CCM0	Calcium/calmodulin-dependent protein kinase type II subunit delta	Camk2d	-0.265172	-0.740888	-0.220843	-0.180893		-0.122162	-0.325214	0.0922074	0.0892269	1.5715e-224	16	13	17	13
Q6ZPR5;Q6ZPR5-4;Q6ZPR5-2;Q6ZPR5-3;E9Q914;E9Q1V5;Q6ZPR5-5;E9Q9L1;E9Q0L7;E9PZU7;E9Q146;E9PVE5;E9Q5R0;E9Q5Z0;E9Q1M2;E9QAA5	Q6ZPR5;Q6ZPR5-4;Q6ZPR5-2;Q6ZPR5-3;E9Q914;E9Q1V5;Q6ZPR5-5;E9Q9L1;E9Q0L7	Sphingomyelin phosphodiesterase 4	Smpd4	-0.0585501	-0.0398306	-0.341709	-0.453206		-0.0204721	-0.0119662	0.140386	0.192068	9.0413e-46	4	2	6	7
E9Q1W7;Q8BM85;Q8BM85-2	E9Q1W7		Tbck	1.14532	#VALUE!	0.374044	-1.53509		0.572017	NaN	-0.144919	0.60065	2.8235e-11	1	0	3	1
E9Q2E4;E9PX61;Q6GQX8	E9Q2E4;E9PX61		Gm15800	0.893659	1.12778	#VALUE!	1.96064		0.448161	0.509746	#VALUE!	-0.719542	1.1127e-49	2	14	0	5
E9Q2H1;Q80TP3	E9Q2H1;Q80TP3	E3 ubiquitin-protein ligase UBR5	Ubr5	-0.905639	-1.05695	-1.2871	-1.21605		-0.437369	-0.466437	0.517225	0.480162	1.16e-265	33	19	70	42
E9Q2S9;Q9CR29;Q9CR29-2	E9Q2S9;Q9CR29;Q9CR29-2	Coiled-coil domain-containing protein 43	Ccdc43	-1.03375	-1.59071	-0.38642	-0.242518		-0.500422	-0.704935	0.158208	0.1125	1.5958e-92	4	5	8	5
E9Q2W8;Q9D920	E9Q2W8;Q9D920	Loss of heterozygosity 12 chromosomal region 1 protein homolog	Loh12cr1	2.38422	0.919122	2.74332	1.98102		1.18174	0.416515	-1.08933	-0.727236	9.4484e-09	1	3	2	2
E9Q317;O55128;D3YY55;D3Z2N9	E9Q317;O55128;D3YY55	Histone deacetylase complex subunit SAP18	Gm10094;Sap18	-0.0330316	-0.0934386	-0.346305	-1.32565		-0.00791317	-0.0359194	0.142217	0.521553	1.6905e-08	2	2	6	1
E9Q342;Q000W5	E9Q342;Q000W5		Gbp6;Gbp10	-5.5205	-5.45208	-8.2537	-7.56475	Down	-2.70859	-2.43028	3.29416	2.8778	1.2461e-25	2	2	1	1
E9Q368	E9Q368		Gm17296	-1.78356	-2.60811	-1.66633	-1.65902		-0.869438	-1.15952	0.668392	0.647453	2.9158e-17	2	1	10	3
E9Q474;E9Q394;F6VCM8;F6RPP1;F7CVS3;E9PVD4	E9Q474;E9Q394;F6VCM8;F6RPP1;F7CVS3		Akap13	-1.09447	#VALUE!	-2.8516	-0.121907		-0.530302	NaN	1.14084	0.0669503	1.0795e-182	2	0	3	1
E9Q3G8	E9Q3G8		Nup153	-1.60584	-0.18547	-2.25635	-2.10137		-0.781975	-0.077041	0.903578	0.814509	5.2336e-91	2	1	3	2
E9Q3L2;F6Y9T6;F6XSW4;D6RJ66	E9Q3L2		Pi4ka	2.37566	2.2398	2.64508	2.21783		1.17754	1.00662	-1.05017	-0.816672	1.2921e-49	5	12	23	12
Q62432;Q62432-2;E9Q3M0;E9Q5P9;E9PXA8	Q62432;Q62432-2;E9Q3M0;E9Q5P9;E9PXA8	Mothers against decapentaplegic homolog 2	Smad2	-1.07401	0.455293	-0.726982	0.0200077		-0.520231	0.209266	0.293959	0.013355	1.3753e-64	2	3	3	4
E9Q3P4;E9PY14;F6V6F0	E9Q3P4		Cenpf	0.698435	#VALUE!	0.914575	-1.04523		0.35208	NaN	-0.360379	0.41565	4.3493e-17	2	0	2	1
E9Q3X0;Q9EQK5;D3Z2N7	E9Q3X0;Q9EQK5	Major vault protein	Mvp	2.06003	2.17388	2.83931	2.63377		1.02219	0.97717	-1.12759	-0.973752	5.0707e-291	47	37	63	63
P59438;E9Q3X4;P59438-2;F6Q7C7;P59438-3	P59438;E9Q3X4;P59438-2;F6Q7C7	Hermansky-Pudlak syndrome 5 protein homolog	Hps5	-0.837565	0.0401079	-0.56117	-1.15671		-0.403866	0.0237522	0.227864	0.457752	5.5264e-61	2	2	2	2
E9Q411	E9Q411		Nbas	0.0745299	0.509574	0.00794813	-0.0856314		0.0450235	0.23352	0.00100955	0.0532505	2.4227e-103	14	14	33	18
E9Q450;Q8BP43	E9Q450;Q8BP43		Tpm1	-0.615398	1.17147	1.36157	1.57755		-0.294526	0.529271	-0.538555	-0.574863	0	4	7	5	6
E9Q481;Q6P2K6;Q6P2K6-2	E9Q481;Q6P2K6	Serine/threonine-protein phosphatase 4 regulatory subunit 3A	Smek1	-1.85457	-1.82717	-2.14436	-2.12065		-0.904386	-0.810587	0.858936	0.821792	3.2897e-42	8	2	17	10
E9QPG2;E9Q4D4;Q7TN88	E9QPG2;E9Q4D4;Q7TN88	Polycystic kidney disease protein 1-like 2	Pkd1l2	-0.870246	-1.30731	-0.28445	-0.204521		-0.419951	-0.578305	0.117562	0.09815	0.00051793	4	1	2	1
E9Q4K7	E9Q4K7		Kif13b	-2.85688	#VALUE!	2.68562	2.46815		-1.39768	NaN	-1.06634	-0.911207	1.6412e-187	1	0	2	1
Q91VN4;E9Q4M4	Q91VN4;E9Q4M4	Coiled-coil-helix-coiled-coil-helix domain-containing protein 6, mitochondrial	Chchd6	#VALUE!	1.17237	0.122402	-1.44769		NaN	0.529671	-0.0446127	0.567643	2.8979e-10	0	1	2	1
E9Q4P1;Q9DAD3;D3Z057;D3YWG9	E9Q4P1		Wdfy1	2.38976	1.66472	2.22789	2.20527		1.18447	0.749663	-0.883875	-0.811928	6.4886e-41	4	5	11	3
E9Q4U7;Q6W4W7;O70566	E9Q4U7;Q6W4W7;O70566	Protein diaphanous homolog 2	Diap2;Diaph2	-0.280399	-0.918666	-0.20485	0.183956		-0.129655	-0.404649	0.0858326	-0.0485614	2.5243e-27	2	1	12	5
E9Q4X2;F6YNY8;G3UXP5;F6X3X7	E9Q4X2		Uggt2	2.87035	2.56368	3.24048	3.06717	Up	1.42099	1.15134	-1.2875	-1.13743	5.4869e-54	6	11	21	18
E9Q4Z2	E9Q4Z2		Acacb	2.36776	-0.353669	-1.8508	-2.02391		1.17364	-0.152195	0.74192	0.785258	2.3871e-281	4	8	6	8
E9Q512;H3BJG4;Q8BVJ9;H3BJU5;H3BJH8	E9Q512;H3BJG4		Trip11	-0.445303	-0.585587	-0.37147	-0.153866		-0.210813	-0.255822	0.152248	0.0790197	2.3615e-52	14	4	7	9
E9Q586;O08788;E9Q3M3;O08788-2;D3YX34;D3YYG9;D3Z2M9	E9Q586;O08788;E9Q3M3;O08788-2;D3YX34	Dynactin subunit 1	Dctn1	0.530666	0.516159	0.401399	0.304728		0.269512	0.236462	-0.155823	-0.0941716	0	86	96	138	91
E9Q5C9	E9Q5C9		Nolc1	-0.392849	-0.611443	0.121358	0.00489819		-0.184998	-0.267375	-0.0441963	0.0190613	1.1892e-186	8	6	9	8
E9Q5D6;P69566;P69566-2	E9Q5D6;P69566;P69566-2	Ran-binding protein 9	Ranbp9	0.431488	#VALUE!	-0.999566	-1.0521		0.220701	NaN	0.402613	0.418244	3.1201e-18	2	0	3	3
E9Q5J9;Q8K0Z5	E9Q5J9;Q8K0Z5		Tpm3	0.671442	0.698898	0.0937347	0.326894		0.338795	0.318114	-0.0331857	-0.102543	0	66	49	79	42
E9Q5W5;Q5SSH7;Q5SSH7-2;Q5SSH7-3	E9Q5W5;Q5SSH7;Q5SSH7-2	Zinc finger ZZ-type and EF-hand domain-containing protein 1	Zzef1	1.20292	0.538828	0.570949	0.836182		0.600365	0.246591	-0.223407	-0.29488	6.4255e-58	9	1	23	10
E9QNL4;Q60680;E9Q605;Q60680-3;Q60680-2	E9QNL4;Q60680;E9Q605;Q60680-3;Q60680-2	Inhibitor of nuclear factor kappa-B kinase subunit alpha	Chuk	-0.862492	-0.713779	-1.07972	-1.02081		-0.416134	-0.313101	0.434562	0.406428	1.8876e-13	4	2	3	2
E9Q616;G5E8K8	E9Q616		Ahnak	0.0408089	0.0688813	0.436243	0.629797		0.0284277	0.0366088	-0.169712	-0.216937	0	1183	1031	1370	955
E9Q634	E9Q634	Unconventional myosin-Ie	Myo1e	0.519946	0.280566	-0.369513	-0.770382		0.264236	0.131194	0.151469	0.311852	1.1306e-39	5	9	10	6
Q6NZN0;Q6NZN0-2;Q6NZN0-4;Q6NZN0-3;E9Q640;Q6NZN0-5;E9PUF4	Q6NZN0;Q6NZN0-2;Q6NZN0-4;Q6NZN0-3;E9Q640;Q6NZN0-5;E9PUF4	RNA-binding protein 26	Rbm26	-2.89426	-2.61858	-1.39448	-1.87958		-1.41608	-1.16421	0.56003	0.730749	1.9655e-53	2	5	11	5
E9Q6C2;Q8CG14;Q8CFG8;E0CZE7	E9Q6C2;Q8CG14	Complement C1s-A subcomponent;Complement C1s-A subcomponent heavy chain;Complement C1s-A subcomponent light chain	C1s;C1sa	5.24745	4.06005	6.74693	6.40116	Up	2.59089	1.81995	-2.6852	-2.39654	1.5127e-34	7	1	9	6
E9Q6C7;Q8JZZ7-2;Q8JZZ7;Q0P6A0;Q3UQ39	E9Q6C7;Q8JZZ7-2;Q8JZZ7	Latrophilin-2	Lphn2	-0.973949	-1.01335	-2.27276	#VALUE!		-0.470989	-0.446954	0.910119	#VALUE!	5.2718e-25	2	2	1	0
E9Q6E5;Q3UIX4;Q8BV04;B7ZNC5;D3Z4B0;D6RE22;F6TN80	E9Q6E5;Q3UIX4;Q8BV04;B7ZNC5		Srsf11	-0.899572	-0.716507	-0.42738	-0.977329		-0.434383	-0.31432	0.174534	0.390007	6.3836e-190	6	4	6	5
E9Q6J5;Q5SQY2	E9Q6J5		Bod1l	-3.10985	-3.44486	-1.68971	-2.18069		-1.52218	-1.53341	0.677711	0.844466	2.7976e-193	7	2	20	6
E9Q6L0;J3QP81	E9Q6L0;J3QP81		Clasp1	-1.76535	-2.54426	-1.39375	-2.40963		-0.860478	-1.131	0.559736	0.930927	0	11	11	36	10
Q80U78;Q80U78-3;Q80U78-2;Q3TTW5;E9Q6M7;A8WHM8;Q80U78-4	Q80U78;Q80U78-3;Q80U78-2;Q3TTW5;E9Q6M7	Pumilio homolog 1	Pum1	-2.2684	-2.91055	-2.10423	-1.33814		-1.10805	-1.29467	0.842939	0.526269	1.6644e-43	3	2	8	1
E9Q6R7	E9Q6R7		Utrn	2.94547	2.72543	1.59662	2.13695		1.45796	1.22361	-0.632249	-0.786124	0	164	221	315	266
Q3UWL8;E9Q6U4;Q6P0X1;E9Q8R1;E9Q4Q8	Q3UWL8;E9Q6U4		Pfdn4	-0.896563	-0.845724	-0.773911	-0.445506		-0.432902	-0.372057	0.312665	0.18916	2.3696e-237	4	4	11	4
E9Q718;Q9R0B9	E9Q718;Q9R0B9	Procollagen-lysine,2-oxoglutarate 5-dioxygenase 2	Plod2	3.54374	3.74171	4.10832	4.02531	Up	1.75241	1.67771	-1.63343	-1.49928	0	61	48	70	54
E9Q777;E9Q774	E9Q777;E9Q774		Akap11	2.06521	0.249164	-1.21481	#VALUE!		1.02475	0.117163	0.488412	#VALUE!	3.0393e-61	3	1	2	0
Q924H2;G3X8S4;E9Q7C1	Q924H2;G3X8S4;E9Q7C1	Mediator of RNA polymerase II transcription subunit 15	Med15	-0.71274	-0.0189319	-0.881856	-1.10744		-0.342433	-0.00262814	0.355693	0.439144	3.8156e-49	1	2	7	2
Q8CD76;Q7TNF4;E9Q7C9;Q5UE59;O88447;F6UYN4	Q8CD76;Q7TNF4;E9Q7C9;Q5UE59;O88447	Kinesin light chain 1	Klc1	0.234053	0.300551	-0.0455447	-0.217703		0.123534	0.140124	0.0223323	0.103128	5.4733e-93	39	15	38	21
E9Q7G0;F6ZQA3	E9Q7G0		Numa1	1.24668	0.6237	-0.27376	-0.289227		0.621899	0.284514	0.1133	0.13014	0	30	19	37	17
Q3UQ84;E9Q7H6;Q3TP97;Q922A3	Q3UQ84;E9Q7H6;Q3TP97;Q922A3	Threonine--tRNA ligase, mitochondrial	Tars2	0.701877	0.22316	0.560232	0.741711		0.353775	0.105544	-0.219136	-0.259202	6.8878e-44	6	5	9	10
E9Q7M2	E9Q7M2		Tsc22d2	-3.1096	-2.61126	-4.00451	-3.55104	Down	-1.52205	-1.16094	1.60041	1.36199	1.0009e-102	4	1	2	1
E9Q9C3;Q9QZQ1;E9Q852;Q9QZQ1-2;E9PYX7;F7C3I9;D3YUD2;D3Z7L2	E9Q9C3;Q9QZQ1;E9Q852;Q9QZQ1-2;E9PYX7	Afadin	Mllt4	-2.3013	-2.55558	-0.877612	-2.33129		-1.12425	-1.13606	0.354001	0.90134	1.6651e-165	21	21	30	24
Q3UXS0;O35609;E9Q855	Q3UXS0;O35609;E9Q855	Secretory carrier-associated membrane protein 3	Scamp3	0.0648534	-0.892105	-0.294778	-0.0797359		0.0402613	-0.392781	0.121679	0.051024	1.8628e-31	2	1	3	1
E9Q8G3	E9Q8G3		Srcap	0.0142463	#VALUE!	0.0428002	-0.0101523		0.0153548	NaN	-0.0128828	0.0247452	1.3672e-05	3	0	2	4
E9Q8K5;E9Q8N1;F7CR78;A2AT70;A2AT68;A2AT65;A2AT66;Q8BUJ6;A2AT67;A2AT64;A2AT62	E9Q8K5;E9Q8N1		Ttn	0.586787	0.228856	1.05068	0.120948		0.297133	0.10809	-0.414634	-0.024766	1.0731e-69	8	14	7	17
F7DCH5;Q08EB6;E9Q8N5;Q8BRT1	F7DCH5;Q08EB6;E9Q8N5;Q8BRT1	CLIP-associating protein 2	Clasp2	-1.24844	-1.59561	-0.393871	-0.486501		-0.606079	-0.707124	0.161178	0.204642	9.2866e-138	2	2	3	3
E9Q8Z8;E9Q8Z6;P30999;G3X9V2;E9Q904;E9Q901;D3Z2H2;E9Q8Z9;E9Q8Z4;E9Q905;E9Q907;D3Z7H6;E9Q986;D3Z2H7	E9Q8Z8;E9Q8Z6;P30999;G3X9V2;E9Q904;E9Q901;D3Z2H2;E9Q8Z9;E9Q8Z4;E9Q905;E9Q907;D3Z7H6;E9Q986;D3Z2H7	Catenin delta-1	Ctnnd1	-0.683338	0.137403	-1.36144	-1.5839		-0.327964	0.0672257	0.546857	0.619084	0	60	33	76	80
E9Q912;E9Q6Q4	E9Q912;E9Q6Q4		Rap1gds1	-0.111322	-0.645432	0.159247	0.10768		-0.0464442	-0.282562	-0.0592994	-0.0197553	0	23	16	44	23
Q8BK08;E9Q933	Q8BK08;E9Q933	Transmembrane protein 11, mitochondrial	Tmem11	-0.466583	-0.935766	-1.304	-1.06123		-0.221287	-0.412289	0.523963	0.421695	3.5872e-13	2	9	8	5
E9Q9A9-2;E9Q9A9	E9Q9A9-2;E9Q9A9		Oas2	-5.11808	-4.42568	-6.87144	-7.94279	Down	-2.51054	-1.97166	2.74319	3.02057	1.8062e-07	1	2	2	2
E9Q9B7	E9Q9B7		Kidins220	0.959313	-0.413455	0.327246	#VALUE!		0.480472	-0.17891	-0.126266	#VALUE!	2.0106e-15	1	1	2	0
Q811D0-3;E9Q9H0;Q811D0;Q811D0-2;H7BWY4;F6UDT8;Q62108-2;Q62108;Q62108-3;Q91XM9-5;B1AR31	Q811D0-3;E9Q9H0;Q811D0;Q811D0-2;H7BWY4;F6UDT8	Disks large homolog 1	Dlg1	1.44426	1.32141	0.595116	0.690124		0.71914	0.596267	-0.23304	-0.239719	1.3239e-107	9	8	19	19
E9Q9J4;Q6ZQB6;Q6ZQB6-3;Q6ZQB6-2	E9Q9J4;Q6ZQB6;Q6ZQB6-3;Q6ZQB6-2	Inositol hexakisphosphate and diphosphoinositol-pentakisphosphate kinase 2	Ppip5k2	-3.6793	-1.93877	-2.21236	-2.86452		-1.80244	-0.860452	0.886043	1.10273	6.6792e-15	1	2	3	1
E9Q9M1;G3X9J6;Q3V1L4	E9Q9M1;G3X9J6;Q3V1L4	Cytosolic purine 5-nucleotidase	Nt5c2	-1.56336	-1.93191	-1.12125	-0.993619		-0.761066	-0.857391	0.451119	0.396159	2.514e-75	7	9	19	12
Q3UJD6;J3KMM1;Q3UJD6-2;E9Q9M5	Q3UJD6;J3KMM1;Q3UJD6-2;E9Q9M5	Ubiquitin carboxyl-terminal hydrolase 19;Ubiquitin carboxyl-terminal hydrolase	Usp19	-0.516488	-0.439587	-0.242507	-0.594678		-0.245848	-0.190586	0.100843	0.245496	2.9278e-51	6	10	13	9
E9Q9Q2	E9Q9Q2		R3hdm1	-0.831211	-3.18357	-1.32283	-0.890348		-0.400739	-1.41665	0.531469	0.357158	2.9191e-16	2	1	1	3
E9QA15;REV__B2RXW8	E9QA15		Cald1	0.518969	-1.70122	0.654992	0.488159		0.263756	-0.75431	-0.256907	-0.163446	0	5	1	5	6
Q7TQK5;E9QAD4	Q7TQK5;E9QAD4	Coiled-coil domain-containing protein 93	Ccdc93	-0.020326	0.776685	-0.235751	#VALUE!		-0.00166007	0.352871	0.09815	#VALUE!	1.3663e-38	9	3	3	0
E9QAE3	E9QAE3		Btaf1	-1.19008	-2.38625	-1.12125	-1.40127		-0.577358	-1.0604	0.451119	0.550113	1.0191e-113	14	17	33	9
Q0VGY8;E9QAF9	Q0VGY8;E9QAF9	Protein TANC1	Tanc1	-1.89762	-3.09405	-2.45492	-1.79014		-0.925577	-1.37666	0.982729	0.696973	3.376e-34	5	4	4	2
E9QAH1;E9PVZ8;Q9CTU9;E9Q028	E9QAH1;E9PVZ8		Golgb1	2.34439	2.13179	0	-0.00564362		1.16215	0.95836	0.00417774	0.0230425	0	113	143	260	126
E9QAQ5;Q9WV60	E9QAQ5;Q9WV60	Glycogen synthase kinase-3 beta	Gsk3b	0.0422458	0.00273232	0.503715	0.555405		0.0291349	0.00705191	-0.196608	-0.188841	9.4721e-225	14	6	10	8
E9QAS5;Q6PDQ2;E9QAS4;F6WR45	E9QAS5;Q6PDQ2;E9QAS4	Chromodomain-helicase-DNA-binding protein 4	Chd4	-3.14347	-2.44113	-2.72074	-2.90188	Down	-1.53872	-1.08492	1.08868	1.11683	0	44	50	64	35
P35922;Q6AXB7;P35922-2;E9QAT0;P35922-3;E9QAS8;E9QNF5;P35922-7;D3Z6U8;P35922-8;P35922-9;E9QAS9;P35922-4;P35922-5;P35922-10;P35922-11	P35922;Q6AXB7;P35922-2;E9QAT0;P35922-3;E9QAS8;E9QNF5;P35922-7;D3Z6U8;P35922-8;P35922-9;E9QAS9;P35922-4;P35922-5;P35922-10;P35922-11	Fragile X mental retardation protein 1 homolog	Fmr1	-0.233946	-0.227464	0.273371	0.0150905		-0.106793	-0.0958049	-0.104791	0.0152121	1.5329e-123	15	12	12	11
E9QAZ2;Q9CZM2;D3Z0H4;B8JKK2;E9Q1X1	E9QAZ2;Q9CZM2;D3Z0H4;B8JKK2	Ribosomal protein L15;60S ribosomal protein L15	Gm10020;Rpl15;Gm5292	-0.0304389	0.00241094	-0.0283983	0.095887		-0.00663718	0.00690831	0.0154976	-0.0153014	8.0599e-194	74	58	89	51
E9QB01;P13595-2	E9QB01;P13595-2		Ncam1	1.55641	2.90713	5.20963	4.8912	Up	0.774334	1.3048	-2.07242	-1.82628	0	7	4	4	4
E9QB02;Q68FL6;F6W0G8	E9QB02;Q68FL6	Methionine--tRNA ligase, cytoplasmic	Mars	-0.161981	-0.352268	0.064227	0.0668097		-0.0713757	-0.15157	-0.0214236	-0.00432009	0	73	47	73	81
G5E8U5;G5E8U8;E9QJS0;Q80ZK0;D3Z6K5	G5E8U5;G5E8U8;E9QJS0;Q80ZK0	28S ribosomal protein S10, mitochondrial	Mrps10	0.0133762	0.409729	0.807134	0.886567		0.0149266	0.188907	-0.317553	-0.313907	1.0728e-37	4	5	8	4
E9QJT2;Q3UMQ8	E9QJT2;Q3UMQ8	H/ACA ribonucleoprotein complex non-core subunit NAF1	Naf1	-2.62166	-2.49869	4.90469	-1.06465		-1.28191	-1.11064	-1.95087	0.422987	3.1604e-22	6	5	5	4
E9QJW0;Q91VS7;D3YU60;D3YVR3	E9QJW0;Q91VS7;D3YU60;D3YVR3	Microsomal glutathione S-transferase 1	Mgst1	6.55117	7.41606	7.76123	7.16257	Up	3.23252	3.31949	-3.08951	-2.68409	1.1784e-63	8	7	7	8
P97798;E9QK04;P97798-4;P97798-3;P97798-2;P97798-5	P97798;E9QK04;P97798-4;P97798-3;P97798-2;P97798-5	Neogenin	Neo1	1.86904	4.25411	2.38737	2.70419		0.9282	1.90666	-0.947445	-1.00035	2.5435e-48	3	2	24	12
E9QK83;Q5XG71	E9QK83;Q5XG71	Small subunit processome component 20 homolog	Utp20	2.68776	2.501	1.47201	1.54616		1.33113	1.12334	-0.582577	-0.563007	7.7329e-117	22	20	33	21
E9QKE4;Q8BMG7;Q8BMG7-2	E9QKE4;Q8BMG7	Rab3 GTPase-activating protein non-catalytic subunit	Rab3gap2	0.169027	0.0161989	0.184261	-0.0999627		0.0915306	0.0130691	-0.0692703	0.0586628	0	30	57	65	42
Q99NH0;E9QKG6;Q99NH0-2;E9Q804;Q99NH0-3;F6SI14	Q99NH0;E9QKG6;Q99NH0-2;E9Q804;Q99NH0-3	Ankyrin repeat domain-containing protein 17	Ankrd17	-2.2291	-1.98672	-1.72327	-1.9401		-1.08871	-0.88188	0.691087	0.753605	0	27	17	42	28
P15092;P15092-2;E9QKL6	P15092;P15092-2;E9QKL6	Interferon-activable protein 204	Ifi204	-1.97709	-2.66229	-3.56521	-2.9698	Down	-0.964686	-1.18374	1.4253	1.14248	2.0444e-88	19	8	18	17
E9QLZ9;Q03173;E9QKQ9;J3QNM3;Q03173-5;E9QKR1;Q03173-4;Q03173-3;Q03173-6;Q03173-2	E9QLZ9;Q03173;E9QKQ9;J3QNM3;Q03173-5;E9QKR1;Q03173-4;Q03173-3;Q03173-6;Q03173-2	Protein enabled homolog	Enah	-0.353163	2.16732	-0.447206	-0.933938		-0.165467	0.974236	0.182438	0.37362	9.9146e-24	4	1	7	3
E9QKT1;O08759	E9QKT1;O08759	Ubiquitin-protein ligase E3A	Ube3a	-0.594191	-0.519721	-0.400662	-0.699562		-0.284089	-0.226392	0.163885	0.285106	5.9227e-110	12	5	21	15
Q91YE6;E9QKZ2;E0CXB2;F6TLX3;E0CY46;F6UT58	Q91YE6;E9QKZ2;E0CXB2	Importin-9	Ipo9	-1.05193	-1.27809	-0.965179	-0.877799		-0.509368	-0.565246	0.388906	0.35242	0	67	73	79	79
P98078;E9QL31;P98078-2;F6TQN9;P98078-3;Q3TRE6;E9PX84;E0CXT5;Q9DCE6;E0CZ53	P98078;E9QL31;P98078-2;F6TQN9;P98078-3;Q3TRE6;E9PX84	Disabled homolog 2	Dab2	0.563554	-0.939851	-1.55111	-1.98985		0.285698	-0.414114	0.622462	0.772392	1.1504e-55	2	4	9	9
E9QL43;Q8CIC2;Q8CIC2-2	E9QL43;Q8CIC2;Q8CIC2-2	Nucleoporin-like protein 2	Nupl2	-0.528854	-0.503932	0.0713603	-0.156396		-0.251934	-0.219337	-0.024267	0.0799754	2.4993e-16	4	2	5	1
E9QLA5;Q0GNC1;Q0GNC1-3	E9QLA5;Q0GNC1;Q0GNC1-3	Inverted formin-2	Inf2	-2.56833	-2.86306	-2.95257	-3.29539	Down	-1.25567	-1.27345	1.1811	1.26544	0	39	58	81	60
E9QLB2;Q3UFF7	E9QLB2;Q3UFF7	Lysophospholipase-like protein 1	Lyplal1	1.05277	1.0409	1.89869	2.20715		0.52647	0.470927	-0.752656	-0.812638	6.4391e-131	5	3	12	5
E9QLK3;Q8C3R1;Q8C3R1-2;D6RE40	E9QLK3;Q8C3R1;Q8C3R1-2	BRCA1-associated ATM activator 1	Baat1;Brat1	-1.4321	-1.88032	-1.91238	-1.52778		-0.696471	-0.834339	0.766468	0.597889	3.0101e-51	4	8	9	8
E9QLL2;Q8BZ98;Q8BZ98-2;E0CXZ8;F2Z460	E9QLL2;Q8BZ98;Q8BZ98-2	Dynamin-3	Dnm3	1.71892	-1.73819	0.426324	1.43163		0.854315	-0.77083	-0.165758	-0.519756	1.8954e-75	1	1	1	1
E9QLQ7;Q91YQ1	E9QLQ7;Q91YQ1	Ras-related protein Rab-7L1	Rab7l1	4.62986	#VALUE!	4.49339	4.30903	Up	2.28694	NaN	-1.78692	-1.60643	2.3511e-11	2	0	2	2
Q8R1F5;E9QLT0	Q8R1F5;E9QLT0	Putative hydroxypyruvate isomerase	Hyi	1.04992	0.221659	0.156119	2.19529		0.525067	0.104873	-0.0580524	-0.808159	9.1426e-18	2	1	4	5
E9QM21;O08734;Q91WX5;F7CUQ1;D3Z3R6	E9QM21;O08734;Q91WX5	Bcl-2 homologous antagonist/killer	Bak1	0.879877	0.112033	-0.635803	-0.298291		0.441377	0.0558898	0.257614	0.133564	5.5545e-121	7	10	15	9
E9QM77;O70305;O70305-2;O70305-3;F6U2C2;F7B6X4;F6V8M6	E9QM77;O70305;O70305-2;O70305-3;F6U2C2	Ataxin-2	Atxn2	-2.55087	-3.49743	-1.44713	-2.00592		-1.24708	-1.5569	0.581014	0.778461	1.4271e-69	6	7	13	11
Q99PP7;E9QP19;Q99PP7-2;E9QME5	Q99PP7;E9QP19;Q99PP7-2;E9QME5	E3 ubiquitin-protein ligase TRIM33	Trim33	-1.42532	-1.82762	-1.49185	-1.09474		-0.693131	-0.810789	0.598842	0.434348	7.8952e-22	4	6	4	2
E9QMF5;Q80TN7;F6SRT8	E9QMF5;Q80TN7;F6SRT8	Neuron navigator 3	Nav3	0.909089	0.555114	1.18135	1.32725		0.455755	0.253868	-0.466716	-0.480337	1.4786e-14	2	2	2	2
E9QMH7;Q9DBZ1	E9QMH7;Q9DBZ1	Inhibitor of nuclear factor kappa-B kinase-interacting protein	Ikbip	5.13647	4.90556	5.52051	5.21649	Up	2.53628	2.19774	-2.19634	-1.94914	0	21	28	32	17
E9QN63;Q9QWY8;H3BJY2;Q9QWY8-3;Q9QWY8-4;H3BL41;E9QMJ1;E9QMI7;Q9QWY8-2;H3BKE6;H3BKD4;H3BK40;E9PX52;Q7SIG6;D3YX85;Q7SIG6-2;H3BJM7	E9QN63;Q9QWY8;H3BJY2;Q9QWY8-3;Q9QWY8-4;H3BL41;E9QMJ1;E9QMI7;Q9QWY8-2;H3BKE6;H3BKD4	Arf-GAP with SH3 domain, ANK repeat and PH domain-containing protein 1	Asap1	2.13877	2.43996	3.71423	2.74182		1.06095	1.09606	-1.47634	-1.01456	2.5169e-126	13	7	20	23
E9QMZ5;Q9QXS1-3	E9QMZ5;Q9QXS1-3		Plec	2.6888	3.73252	0.208341	-1.29707		1.33165	1.6736	-0.0788684	0.510759	0	3	3	6	3
Q8C5P5;Q8C5P5-2;E9QN01;Q8C5P5-3	Q8C5P5;Q8C5P5-2;E9QN01;Q8C5P5-3	5-nucleotidase domain-containing protein 1	Nt5dc1	-1.69826	-1.89747	#VALUE!	-2.05987		-0.827461	-0.841999	#VALUE!	0.798838	0.00025874	1	2	0	1
E9QN12;E9QPE2;P05622	E9QN12;E9QPE2;P05622	Platelet-derived growth factor receptor beta	Pdgfrb	2.58363	2.37419	1.0694	0.828366		1.27989	1.06667	-0.422095	-0.291928	0	65	60	82	68
E9QN31;Q922K7	E9QN31;Q922K7	Putative ribosomal RNA methyltransferase NOP2	Nop2	-1.56261	-1.44903	-1.41846	-1.38139		-0.7607	-0.641626	0.569588	0.542605	0	33	17	30	34
E9QN70;P02469;E9PYT5;E9Q339	E9QN70;P02469	Laminin subunit beta-1	Lamb1	-1.17708	-1.85001	-1.30576	-2.44652		-0.570957	-0.820795	0.524665	0.944858	0	81	60	101	71
E9QN87;Q9QXS1;E9QPE8;Q9QXS1-2	E9QN87;Q9QXS1;E9QPE8;Q9QXS1-2	Plectin	Plec	3.99372	4.59724	-0.476114	-0.414219		1.97387	2.05998	0.193961	0.177344	0	1246	1129	1529	1033
E9QN99;Q8VCR7	E9QN99;Q8VCR7	Abhydrolase domain-containing protein 14B	Abhd14b	2.16563	2.53638	1.55962	1.45834		1.07416	1.13914	-0.617499	-0.529843	5.8695e-120	18	12	22	13
E9QNN1;O70133-2;O70133;O70133-3	E9QNN1;O70133-2;O70133;O70133-3	ATP-dependent RNA helicase A	Dhx9	0.639748	0.671068	-0.121016	-0.107291		0.323197	0.305679	0.0524159	0.0614305	0	68	69	81	71
E9QNR6;Q8VD62	E9QNR6;Q8VD62	UPF0696 protein C11orf68 homolog	AI837181;Bles03	-0.254122	-0.648495	0.0885905	-0.697366		-0.116723	-0.283931	-0.0311351	0.284277	1.4135e-85	10	11	10	9
E9QNV2;Q80YQ2-2;F8WJB0;Q80YQ2;H3BK33;H3BLE0;H3BJ42	E9QNV2;Q80YQ2-2;F8WJB0;Q80YQ2;H3BK33	Mediator of RNA polymerase II transcription subunit 23	Med23	-0.57498	-0.504422	-0.898788	-0.889154		-0.274634	-0.219556	0.362442	0.356707	5.7488e-61	17	11	7	21
E9QNY8;Q9JLC8;Q9JLC8-3;D3Z3H1;B2RRL5	E9QNY8;Q9JLC8;Q9JLC8-3	Sacsin	Sacs	0.435511	0.34796	0.0325533	-0.0564347		0.222681	0.161307	-0.00879824	0.0422242	1.4616e-141	17	7	10	12
E9QP00;Q6PFR5	E9QP00;Q6PFR5	Transformer-2 protein homolog alpha	Tra2a	-1.16925	-1.53085	6.84005	-0.389477		-0.567105	-0.678187	-2.72232	0.168	4.3063e-127	1	1	3	3
Q6ZWQ0;E9QP46;Q6DFZ2;Q6ZWQ0-3;F6W8R9;Q6ZWN0;Q6ZWQ0-2;D3YVK9;D3Z2J8	Q6ZWQ0;E9QP46	Nesprin-2	Syne2	-2.75853	-2.17627	-5.72111	-4.51792	Down	-1.34927	-0.966573	2.28466	1.72714	1.456e-241	8	7	49	17
E9QP49;Q99MS7;Q99MS7-2;Q99MS7-3;G5E8Y6;Q99MS7-5;Q99MS7-4	E9QP49;Q99MS7;Q99MS7-2;Q99MS7-3	EH domain-binding protein 1-like protein 1	Ehbp1l1	-1.45835	-0.812507	-0.649099	-1.10152		-0.709387	-0.357215	0.262914	0.436908	8.3339e-191	2	7	10	8
E9QP62;Q99JW4;Q9D7B2;Q91XD2	E9QP62;Q99JW4;Q9D7B2	LIM and senescent cell antigen-like-containing domain protein 1	Lims1	0.900742	0.233348	0.844767	0.847682		0.451646	0.110096	-0.332553	-0.299223	0	25	16	42	17
E9QP99;P55937;P55937-1;D3Z0Q8	E9QP99;P55937;P55937-1	Golgin subfamily A member 3	Golga3	0.281829	1.30621	0.489559	0.244607		0.147046	0.589476	-0.190964	-0.0714668	2.9181e-203	37	8	44	32
E9QPB3;P59328;P59328-3;P59328-2	E9QPB3;P59328;P59328-3	WD repeat and HMG-box DNA-binding protein 1	Wdhd1	-1.29453	-0.936496	-1.18138	-1.1631		-0.628765	-0.412616	0.475085	0.460166	4.8587e-87	1	4	8	10
E9QPD4;Q3B7Z2;Q3B7Z2-2;Q5F209	E9QPD4;Q3B7Z2;Q3B7Z2-2	Oxysterol-binding protein;Oxysterol-binding protein 1	Osbp	-0.15595	-1.11293	-0.3835	-0.244284		-0.0684077	-0.49145	0.157044	0.113167	8.8702e-288	18	5	29	16
E9QPD7;G5E8R3	E9QPD7;G5E8R3	Pyruvate carboxylase	Pcx	-0.0592936	0.00658593	-0.293446	-0.249226		-0.020838	0.00877379	0.121148	0.115033	0	79	73	97	71
E9QPI5;Q6A026	E9QPI5;Q6A026	Sister chromatid cohesion protein PDS5 homolog A	Pds5a	-0.617123	-0.83292	-1.13341	-1.1656		-0.295376	-0.366336	0.455965	0.461109	0	42	49	48	34
E9QPQ8;Q8JZS9;D3Z6C8	E9QPQ8;Q8JZS9	39S ribosomal protein L48, mitochondrial	Mrpl48	0.804437	0.786783	0.307548	0.539803		0.404249	0.357383	-0.118414	-0.18295	7.5708e-24	7	5	10	7
E9QPX0;Q9DBR4;Q3TIZ5;Q9DBR4-2;E9PWH3;Q9DBR4-3;Q3TDW6;F6V8Y6;E0CYJ4;E0CZA9;E0CYY8	E9QPX0;Q9DBR4;Q3TIZ5;Q9DBR4-2;E9PWH3;Q9DBR4-3;Q3TDW6	Amyloid beta A4 precursor protein-binding family B member 2	Apbb2	0.277855	0.746458	0.98263	0.698161		0.145091	0.339365	-0.387506	-0.242755	4.6935e-229	2	1	5	2
E9QPX3;Q9CXZ1	E9QPX3;Q9CXZ1	NADH dehydrogenase [ubiquinone] iron-sulfur protein 4, mitochondrial	Ndufs4	0.466247	0.513965	-1.40111	-0.149161		0.237808	0.235482	0.56267	0.0772429	1.138e-14	5	3	7	3
E9QPY6;P13705	E9QPY6;P13705	DNA mismatch repair protein Msh3	Msh3	#VALUE!	-1.31799	-2.78416	-1.44769		NaN	-0.583074	1.11397	0.567643	6.6445e-09	0	1	1	2
Q9Z2A0;F2Z3X6;Q3TRL2;F2Z400;F2Z3Z9;F2Z4A5	Q9Z2A0;F2Z3X6;Q3TRL2;F2Z400	3-phosphoinositide-dependent protein kinase 1	Pdpk1	0.493712	0.138943	0	-0.0329902		0.251325	0.067914	0.00417774	0.0333701	2.6793e-112	3	1	3	3
F2Z4A3	F2Z4A3		Fat1	4.09797	3.26631	2.8151	2.95259	Up	2.02517	1.4653	-1.11794	-1.09416	2.6002e-265	18	20	71	44
H3BLH0;F2Z4A9;Q6DIC0;H3BJK2;E9QAB8;H3BK47;H3BKJ3;Q9D007;H3BLI4;H3BJI1;H3BJM2;H3BKN5	H3BLH0;F2Z4A9;Q6DIC0;H3BJK2;E9QAB8	Probable global transcription activator SNF2L2	Smarca2	0.405715	#VALUE!	-0.42385	0.136018		0.208018	NaN	0.173128	-0.0304572	1.3639e-36	1	0	1	1
Q9CWX9;F6QKD2	Q9CWX9;F6QKD2	Probable ATP-dependent RNA helicase DDX47	Ddx47	-1.05419	-0.98936	-1.33059	-1.17447		-0.510478	-0.436237	0.53456	0.464459	1.0122e-68	5	12	6	8
P47915;F6QL70;D3Z1N9;D3YU65;F6YH22;F6VZG1	P47915;F6QL70;D3Z1N9;D3YU65;F6YH22;F6VZG1	60S ribosomal protein L29	Rpl29;Gm17669;Gm10709;Gm3550;Gm5218;Gm4889	-0.111928	-0.31912	-0.0244574	0.0625209		-0.0467422	-0.136759	0.0139267	-0.00270035	1.0341e-76	21	19	22	17
Q60949;F6QUA9;Q60949-2;E9Q6L4	Q60949;F6QUA9;Q60949-2;E9Q6L4	TBC1 domain family member 1	Tbc1d1	#VALUE!	-1.79292	-1.71452	-1.55394		NaN	-0.795283	0.687598	0.607768	1.5148e-109	0	2	1	2
Q5HZJ0;F6QX82	Q5HZJ0;F6QX82	Ribonuclease 3	Drosha	#VALUE!	0.185125	-0.231692	-0.116067		NaN	0.0885487	0.0965318	0.0647449	0.00012481	0	2	2	2
F6R9G0	F6R9G0		Ep400	#VALUE!	-2.9802	-2.83334	-2.00792		NaN	-1.32579	1.13356	0.779218	3.2276e-05	0	1	3	2
Q9JIX8;Q9JIX8-4;F6RJ39;B8JJ91;Q9JIX8-2;Q9JIX8-3;B8JJ90;B8JJ89	Q9JIX8;Q9JIX8-4;F6RJ39;B8JJ91;Q9JIX8-2;Q9JIX8-3	Apoptotic chromatin condensation inducer in the nucleus	Acin1	-0.789635	-0.393271	-0.78671	#VALUE!		-0.380277	-0.169891	0.317767	#VALUE!	6.4564e-240	2	1	2	0
Q9JJK2;F6RJV6	Q9JJK2;F6RJV6	LanC-like protein 2	Lancl2	-1.17877	-1.19941	-2.52476	-2.31776		-0.571793	-0.530093	1.01056	0.896233	1.8906e-33	1	1	9	3
Q9CQE7-2;Q9CQE7;F6UIS1;F6RK81	Q9CQE7-2;Q9CQE7;F6UIS1;F6RK81	Endoplasmic reticulum-Golgi intermediate compartment protein 3	Ergic3	0.935051	0.739306	0.167742	0.0135786		0.468531	0.336169	-0.0626857	0.015783	8.3624e-19	6	1	4	3
Q9CWY8;F6RP29;Q05C51	Q9CWY8;F6RP29;Q05C51	Ribonuclease H2 subunit A;Ribonuclease	Rnaseh2a	-2.13547	-1.93877	-1.77668	-1.87105		-1.04264	-0.860452	0.712376	0.727528	5.908e-15	5	5	3	1
F6RPJ9;Q9JHR7	F6RPJ9;Q9JHR7	Insulin-degrading enzyme	Ide	-0.683046	-0.532172	-0.335465	-0.20987		-0.327819	-0.231955	0.137897	0.10017	1.8103e-262	38	24	73	55
Q922X9;F6RXJ8;D3Z1C9	Q922X9;F6RXJ8	Protein arginine N-methyltransferase 7	Prmt7	-2.4061	-2.34975	-1.63316	-1.37325		-1.17583	-1.04409	0.655169	0.539531	4.0327e-21	1	2	5	2
Q9JJZ4;F6SPK0;B1AWT7	Q9JJZ4;F6SPK0	Ubiquitin-conjugating enzyme E2 J1	Ube2j1	3.83371	#VALUE!	1.16219	2.58005		1.89511	NaN	-0.45908	-0.953467	2.6869e-254	8	0	13	1
F6TCF9;Q60739;Q60739-2	F6TCF9;Q60739;Q60739-2	BAG family molecular chaperone regulator 1	Bag1	0.606049	0.660077	0.0262228	-0.0778919		0.306612	0.300768	-0.00627488	0.0503276	6.1331e-41	16	9	16	10
F6UFZ5	F6UFZ5		Pcf11	-4.29826	0.211134	-1.2246	0.466017		-2.10706	0.10017	0.492315	-0.155084	2.7695e-24	3	2	1	1
Q9R0Q3;F6V6T4;Q8BPI2	Q9R0Q3;F6V6T4;Q8BPI2	Transmembrane emp24 domain-containing protein 2	Tmed2	1.23446	1.24578	0.208188	0.188463		0.615887	0.562474	-0.0788075	-0.0502633	1.2494e-143	29	16	44	12
F6VRP8	F6VRP8		Lgals3bp	8.75092	#VALUE!	9.70856	6.85014	Up	4.31513	NaN	-3.86573	-2.5661	5.0798e-15	1	0	4	1
F6VW30;P68254;F6YY69;P68254-2	F6VW30;P68254;F6YY69;P68254-2	14-3-3 protein theta	Ywhaq	-1.35179	-1.50481	-1.59783	-1.57544		-0.656945	-0.666553	0.641084	0.615887	0	72	82	75	71
F6WJB7;Q6ZQ93;Q6ZQ93-2;Q6ZQ93-3;F6SZG2;F7BSN3;Q6ZQ93-4	F6WJB7;Q6ZQ93;Q6ZQ93-2;Q6ZQ93-3;F6SZG2;F7BSN3;Q6ZQ93-4	Ubiquitin carboxyl-terminal hydrolase;Ubiquitin carboxyl-terminal hydrolase 34	Usp34	1.22143	1.92401	0.0383846	2.11907		0.609471	0.865523	-0.0111226	-0.779373	7.2918e-134	7	20	33	11
Q8BRN9;F6XC25	Q8BRN9;F6XC25	Coiled-coil and C2 domain-containing protein 1B	Cc2d1b	-1.00935	3.15244	-0.723438	-0.845951		-0.488411	1.41441	0.292546	0.340391	5.812e-74	4	3	9	8
F6XLV1	F6XLV1		E030010N08Rik	#VALUE!	-1.18964	-2.55143	0.149541		NaN	-0.525725	1.0212	-0.0355643	1.1793e-06	0	2	1	1
F6YVP7;P62270;F5H8M6;G3UZW2;D3YWV7	F6YVP7;P62270;F5H8M6;G3UZW2;D3YWV7	40S ribosomal protein S18	Gm17352;Rps18;Gm10260;Gm5321	0.103088	0.134937	0.113976	0.125848		0.0590784	0.0661237	-0.0412539	-0.0266165	0	70	92	86	95
Q8VEH8;F6Z458	Q8VEH8;F6Z458	Endoplasmic reticulum lectin 1	Erlec1	-1.21018	#VALUE!	-1.50973	-1.27232		-0.587251	NaN	0.605968	0.501414	1.5501e-10	4	0	1	3
O88286;O88286-3;F6ZBR8;O88286-2;G5E8J8	O88286;O88286-3;F6ZBR8;O88286-2;G5E8J8	Protein Wiz	Wiz	-0.49519	-0.128116	-0.368864	-0.115337		-0.235365	-0.0514141	0.151209	0.0644689	6.0543e-65	2	2	1	1
F6ZFU0	F6ZFU0		Eef1d	0.48335	0.448584	1.12975	1.07067		0.246226	0.206268	-0.446148	-0.383435	0	3	4	2	4
F6ZHD8;Q9D6Y9;G3UW30	F6ZHD8;Q9D6Y9;G3UW30	1,4-alpha-glucan-branching enzyme	Gbe1	-1.8692	-2.78214	-0.206895	0.0465943		-0.911587	-1.23729	0.0866479	0.00331438	1.2213e-08	1	1	4	1
F6ZMJ4;Q3UHK8	F6ZMJ4;Q3UHK8	Trinucleotide repeat-containing gene 6A protein	Tnrc6a	1.93093	2.79559	3.86937	#VALUE!		0.958657	1.25496	-1.53818	#VALUE!	6.9835e-19	1	2	3	0
F7A6H4	F7A6H4		Rnf213	-1.82574	-1.91936	-3.57569	-3.17758		-0.890198	-0.851782	1.42948	1.22095	0	436	401	968	563
F7ACR9;F6Q750;F6RL59	F7ACR9;F6Q750		Macf1	2.26056	1.75541	1.21183	1.95135		1.12088	0.790188	-0.478869	-0.716031	0	9	5	12	6
F7AGE9	F7AGE9		Obsl1	0.141663	0.0213144	-0.021589	0.132235		0.0780633	0.0153548	0.0127833	-0.0290285	9.1307e-05	2	3	2	1
G3X9A8;Q80UP5;Q6PD24;F7B209	G3X9A8;Q80UP5;Q6PD24;F7B209	Ankyrin repeat domain-containing protein 13A;Ankyrin repeat domain-containing protein 13D	Ankrd13d;Ankrd13a	1.4212	1.22208	1.04798	1.12189		0.70779	0.551885	-0.413557	-0.402779	0.00027216	1	2	2	2
F7CK47	F7CK47	Microtubule-associated protein	Mtap4	-0.414658	-0.113727	#VALUE!	-0.172625		-0.195732	-0.0449849	#VALUE!	0.0861043	0	1	8	0	8
F7CVJ5	F7CVJ5		Ahnak2	-1.31313	-1.58041	-0.507303	-0.619089		-0.637917	-0.700333	0.206393	0.254715	0	2	2	2	2
F7DBB3;Q3URZ6	F7DBB3		Ahnak2	-0.167036	-0.456358	0.616234	0.454848		-0.0738639	-0.19808	-0.241458	-0.150866	0	44	41	64	46
F8VPK0	F8VPK0		Ttc37	-0.00495895	0.156454	-0.229998	-0.344672		0.00590291	0.075738	0.0958569	0.151079	8.8825e-171	23	27	32	38
F8VPM7;Q99MI1;Q99MI1-3;Q99MI1-2;Q99MI1-4	F8VPM7;Q99MI1;Q99MI1-3;Q99MI1-2	ELKS/Rab6-interacting/CAST family member 1	Erc1	-0.791045	0.844979	0.00903364	-0.543749		-0.380972	0.383386	0.000576859	0.226262	6.5348e-133	14	20	19	24
F8VPN4;F6XXE6;E0CYU6;E0CX86	F8VPN4		Agl	1.79036	1.53022	3.06517	2.72265		0.889473	0.689568	-1.21762	-1.00732	7.3128e-15	3	3	6	8
F8VPP8	F8VPP8		Zc3h7b	0.571958	1.00506	1.59404	1.7324		0.289834	0.454913	-0.63122	-0.633345	7.6351e-20	3	1	4	2
F8VPU2;E9Q805	F8VPU2		Farp1	0.26164	0.236936	0.947808	0.802867		0.13711	0.111699	-0.373626	-0.282298	0	17	25	36	26
F8VPU6	F8VPU6	Ubiquitin carboxyl-terminal hydrolase	Usp9y	1.03174	-0.206553	0.814946	#VALUE!		0.516116	-0.0864614	-0.320666	#VALUE!	2.3655e-103	1	1	2	0
F8VPX1;E9PXY8;Q6A4J8;Q6A4J8-2;Q6A4J8-3;G3UWR8;E0CY04	F8VPX1;E9PXY8;Q6A4J8;Q6A4J8-2;Q6A4J8-3	Ubiquitin carboxyl-terminal hydrolase;Ubiquitin carboxyl-terminal hydrolase 7	Usp7	0.444039	0.502151	0.543042	0.317022		0.226878	0.230203	-0.212283	-0.0988146	3.2123e-200	67	58	81	66
F8VQ05;F6Q1V8	F8VQ05		Fryl	-1.53724	-1.25543	-1.82059	-1.95796		-0.748214	-0.555121	0.729879	0.760349	4.2768e-37	7	9	14	8
F8VQ28;Q8VI36;Q8VI36-2	F8VQ28;Q8VI36;Q8VI36-2	Paxillin	Pxn	-2.94628	-2.64969	-1.82844	-2.02369		-1.44167	-1.17811	0.733007	0.785174	4.069e-243	5	3	11	6
F8VQ29	F8VQ29		Iqgap3	2.34819	2.03891	2.38248	2.12255		1.16401	0.916859	-0.945499	-0.780686	2.8509e-251	18	6	26	26
F8VQ87;P97789;P97789-2;P97789-3	F8VQ87;P97789;P97789-2;P97789-3	5-3 exoribonuclease 1	Xrn1	-0.165895	#VALUE!	0.0328084	-3.73401		-0.0733022	NaN	-0.00889994	1.43109	9.4368e-16	1	0	8	1
F8VQ95;Q6Y685;Q6Y685-2	F8VQ95;Q6Y685;Q6Y685-2	Transforming acidic coiled-coil-containing protein 1	Tacc1	1.60384	1.20087	2.102	1.46861		0.797677	0.542407	-0.833696	-0.533723	3.7833e-23	2	2	4	2
F8VQB6;E9Q5G1;D3YXU7;D3YXW4;D3YZ13;D3Z2E0;D3Z2P4	F8VQB6;E9Q5G1	Unconventionnal myosin-X	Myo10	-0.554413	1.21392	-0.235413	#VALUE!		-0.264512	0.548239	0.0980152	#VALUE!	1.2362e-11	1	1	1	0
F8VQC1;E9Q740	F8VQC1;E9Q740		Srp72	1.12315	1.14564	1.57403	1.57095		0.561106	0.517729	-0.623243	-0.572372	0	53	47	71	50
F8VQC7	F8VQC7		Ktn1	-0.634262	-1.12931	-0.946333	0.032518		-0.30381	-0.49877	0.381394	0.0086304	0	89	91	120	76
F8VQC9;Q8BTY2-2;Q5DTL9;B1AWV9;Q5DTL9-2	F8VQC9;Q8BTY2-2		Slc4a7	0.327534	0.3175	0.351305	0.55854		0.16954	0.147697	-0.135855	-0.190026	5.0103e-272	5	3	5	2
F8VQJ3;P02468;F6TLW1;F6SFQ3	F8VQJ3;P02468	Laminin subunit gamma-1	Lamc1	-0.0445201	-0.63645	-0.225254	-0.735758		-0.0135672	-0.278549	0.0939657	0.298776	0	55	48	92	66
F8VQN6;Q8R4H2	F8VQN6;Q8R4H2	Rho guanine nucleotide exchange factor 12	Arhgef12	1.12077	1.17863	0.22739	-0.304903		0.559932	0.532467	-0.0864615	0.13606	2.9244e-48	2	1	8	3
P83877;F8WGE7	P83877;F8WGE7	Thioredoxin-like protein 4A	Txnl4a	-1.68011	#VALUE!	-1.02875	-2.88123		-0.818528	NaN	0.414244	1.10903	2.0872e-06	2	0	1	2
F8WGQ9;Q922M3	F8WGQ9;Q922M3	BTB/POZ domain-containing adapter for CUL3-mediated RhoA degradation protein 3	Kctd10	0.027269	#VALUE!	-0.180556	0.655771		0.021764	NaN	0.0761486	-0.226746	8.0932e-10	1	0	4	2
Q497V5;F8WGW3;Q497V5-2	Q497V5;F8WGW3	S1 RNA-binding domain-containing protein 1	Srbd1	0.156068	0.445504	0.107055	0.623101		0.0851526	0.204892	-0.0384952	-0.214408	2.6545e-10	1	3	4	1
F8WGX5;Q6PNC0	F8WGX5;Q6PNC0	DmX-like protein 1	Dmxl1	-1.11209	-2.7931	0.970763	#VALUE!		-0.538974	-1.24219	-0.382777	#VALUE!	7.8094e-15	2	1	2	0
F8WH23;Q61581;E9Q5D9	F8WH23;Q61581;E9Q5D9	Insulin-like growth factor-binding protein 7	Igfbp7	4.64478	4.88897	3.1815	3.25482	Up	2.29428	2.19033	-1.26399	-1.20829	8.3172e-117	19	17	38	25
Q60823;F8WHG5;D3Z3N2;D3YXM7;D3Z490;D3Z5X2;D3YZJ5;D3Z0M3	Q60823;F8WHG5;D3Z3N2;D3YXM7	RAC-beta serine/threonine-protein kinase	Akt2	-0.232178	-0.0993691	-0.524204	-0.38165		-0.105923	-0.0385693	0.213129	0.165044	1.2208e-17	2	4	6	5
F8WHT3;Q7TPM1;F7AYW2;A2AN33	F8WHT3;Q7TPM1;F7AYW2	Protein PRRC2B	Prrc2b	0.174249	1.29654	-0.145713	0.99552		0.0941009	0.585155	0.06226	-0.355055	0	6	2	4	1
F8WHU5;Q4VA53-3;Q4VA53;Q4VA53-2	F8WHU5;Q4VA53-3;Q4VA53	Sister chromatid cohesion protein PDS5 homolog B	Pds5b	-0.642851	-0.89185	-0.146752	-0.338131		-0.308037	-0.392667	0.0626743	0.148609	0	34	41	46	44
Q62384;F8WHU9;F8WIG4	Q62384;F8WHU9;F8WIG4	Zinc finger protein ZPR1	Znf259;Zfp259	-1.02378	-1.27665	-1.06227	-0.982863		-0.495512	-0.564606	0.427606	0.392098	5.9063e-194	12	8	16	8
Q3TWL2;F8WHW3;E0CYE6;E0CZ18;E0CZF6	Q3TWL2;F8WHW3;E0CYE6	Transmembrane protein 55B	Tmem55b	1.08314	0.661912	1.53384	2.47815		0.541416	0.301588	-0.607221	-0.914983	3.9883e-26	5	1	9	2
Q8K019;Q8K019-2;F8WI22;Q8K019-3	Q8K019;Q8K019-2;F8WI22;Q8K019-3	Bcl-2-associated transcription factor 1	Bclaf1	#VALUE!	0.676028	0.410684	0.042785		NaN	0.307895	-0.159525	0.00475299	0	0	2	4	6
F8WI30;Q9CY18;F6RSR4;F7D3B8	F8WI30;Q9CY18;F6RSR4;F7D3B8	Sorting nexin-7	Snx7	0.700502	#VALUE!	1.43926	0.471935		0.353097	NaN	-0.569522	-0.157319	2.5011e-32	1	0	3	3
F8WID1;Q8VEG4	F8WID1;Q8VEG4	Exonuclease 3-5 domain-containing protein 2	Exd2	-1.47218	-2.14206	#VALUE!	1.09261		-0.716197	-0.951289	#VALUE!	-0.391721	6.7341e-10	2	10	0	1
F8WID5	F8WID5		Tpm1	5.70473	5.69157	3.08341	5.64733	Up	2.81594	2.54895	-1.22489	-2.11185	0	6	2	4	3
F8WIE5;Q69ZR2	F8WIE5;Q69ZR2	E3 ubiquitin-protein ligase HECTD1	Hectd1	-2.12239	-1.85726	-2.11752	-2.14005		-1.0362	-0.824035	0.848237	0.829119	3.2104e-218	33	35	43	31
F8WIG5;Q9Z207	F8WIG5;Q9Z207	Protein diaphanous homolog 3	Diap3;Diaph3	-0.13558	0.464218	0.372045	0.452473		-0.0583828	0.213254	-0.144122	-0.149969	6.2916e-26	3	7	10	12
F8WIJ0;Q9JIS8;Q924N4;Q3V0N8;Q6P6P5;Q924N4-2;A2AGJ9;F6TQE2	F8WIJ0;Q9JIS8	Solute carrier family 12 member 4	Slc12a4	-0.531264	-0.31692	-0.287784	-0.246756		-0.25312	-0.135776	0.118891	0.1141	2.898e-25	6	6	2	5
F8WIT2	F8WIT2	Annexin	Anxa6	-1.29422	-1.29721	0.746749	0.784053		-0.628608	-0.573789	-0.293483	-0.275193	0	164	103	79	70
F8WIU1;Q9D1K7;H7BXB9	F8WIU1;Q9D1K7;H7BXB9	UPF0687 protein C20orf27 homolog	1700037H04Rik	-1.75451	-1.43812	-1.8243	-2.24838		-0.855144	-0.63675	0.731357	0.870029	4.642e-22	6	4	8	2
Q6GSS7;Q64523;F8WIX8	Q6GSS7;Q64523;F8WIX8	Histone H2A type 2-A;Histone H2A type 2-C;Histone H2A	Hist2h2aa1;Hist2h2ac;Hist1h2al	0.85342	2.90465	2.33278	0.619423		0.428357	1.30369	-0.925686	-0.213019	6.7688e-270	2	3	11	7
F8WJ93;Q3UMY5;Q3UMY5-3;Q3UMY5-2;Q3UMY5-4	F8WJ93;Q3UMY5;Q3UMY5-3;Q3UMY5-2;Q3UMY5-4	Echinoderm microtubule-associated protein-like 4	Eml4	-1.43929	0.468392	-0.764282	-0.890644		-0.700005	0.215119	0.308827	0.35727	2.2042e-152	13	3	24	17
F8WJA0;Q9ESV0	F8WJA0;Q9ESV0	ATP-dependent RNA helicase DDX24	Ddx24	-1.64859	#VALUE!	-3.57677	-3.37885		-0.803015	NaN	1.42991	1.29696	4.9768e-149	3	0	9	2
F8WJD4;Q80X82;D3Z2M2;F6UJ99	F8WJD4;Q80X82	Symplekin	Sympk	-1.2784	-1.68221	-1.76849	-2.1726		-0.620823	-0.745817	0.709114	0.84141	0	34	41	63	25
Q99L47;F8WJK8;E9Q1V0;E9Q1X9	Q99L47;F8WJK8	Hsc70-interacting protein	St13	0.0821913	-0.232609	-0.0665102	0.0905624		0.0487942	-0.098104	0.0306892	-0.0132905	0	29	42	38	30
G3UVU2;Q62203;D3YW09;D3Z5A6	G3UVU2;Q62203;D3YW09	Splicing factor 3A subunit 2	Sf3a2	0.217865	0.121028	0.466742	0.477477		0.115566	0.059909	-0.181869	-0.159412	1.1116e-60	10	8	21	11
Q0VG62;G3UW58	Q0VG62;G3UW58	Uncharacterized protein C8orf59 homolog	Gm4540	-1.68358	-1.50666	-2.16049	-2.12691		-0.820234	-0.667378	0.865365	0.824157	2.2056e-11	1	2	3	2
G3UWA6	G3UWA6		Slc3a2	1.889	1.74382	2.37455	2.37609		0.938022	0.785006	-0.942335	-0.87644	0	93	79	115	114
G3UWG1;P62897;CON__P62894;P00015	G3UWG1;P62897	Cytochrome c, somatic	Gm10108;Cycs	1.23828	2.03326	#VALUE!	2.11337		0.617769	0.914335	#VALUE!	-0.77722	1.6434e-267	1	47	0	67
G3UXL4;Q5U4B1;G3X8Z6;G3UWX1;G3UZ76	G3UXL4;Q5U4B1;G3X8Z6;G3UWX1		Rfc1	1.14216	0.447744	0.171638	-0.442154		0.570463	0.205893	-0.0642385	0.187894	4.4729e-254	8	8	19	6
O88379;G3UWZ0;G3UZ82;G3UXR5;G3UZD1	O88379;G3UWZ0	Bromodomain adjacent to zinc finger domain protein 1A	Baz1a	#VALUE!	-10.0186	0.746706	0.144689		NaN	-4.4707	-0.293465	-0.033732	9.2127e-14	0	1	1	1
G3UXA6;G8JL74;Q8BHD7;Q8BHD7-2;G3UY95;F7C521	G3UXA6;G8JL74;Q8BHD7;Q8BHD7-2	Polypyrimidine tract-binding protein 3	Rod1;Ptbp3	#VALUE!	-0.453841	-0.29378	-1.61413		NaN	-0.196955	0.121281	0.630499	4.9503e-34	0	1	2	2
G3UXL2;Q9D7G0	G3UXL2;Q9D7G0	Ribose-phosphate pyrophosphokinase;Ribose-phosphate pyrophosphokinase 1	Prps1l3;Prps1	0.0502785	-0.641622	-0.100366	-0.0918847		0.0330882	-0.28086	0.0441843	0.0556121	3.1429e-273	36	36	40	41
G3UYX7;G3UZ88;G3UXV6;G3UY21;Q9R1B9;G3X909;G3UWQ3;G3UZ61	G3UYX7;G3UZ88;G3UXV6;G3UY21;Q9R1B9;G3X909	Slit homolog 2 protein;Slit homolog 2 protein N-product;Slit homolog 2 protein C-product	Slit2	-0.412577	#VALUE!	-1.71362	-0.204521		-0.194708	NaN	0.68724	0.09815	1.0443e-06	2	0	1	3
G3UXW9;Q3MIA8;Q99LD4;B1ATU4;Q99LD4-2	G3UXW9;Q3MIA8;Q99LD4;B1ATU4;Q99LD4-2	COP9 signalosome complex subunit 1	Gps1	-0.340794	-0.596011	-0.60143	-0.553533		-0.15938	-0.26048	0.243913	0.229957	9.4854e-96	20	16	26	18
P97371;G3UXZ5;G3X9K9;G3UXY0;G3UWN9;G3UXR1	P97371;G3UXZ5;G3X9K9;G3UXY0;G3UWN9	Proteasome activator complex subunit 1	Psme1	-2.97428	-2.8886	-3.01416	-2.82915	Down	-1.45546	-1.28486	1.20564	1.08936	0	54	48	52	43
G3UYJ7;G3UZN1	G3UYJ7;G3UZN1		Gm20441;Ddt	6.8015	7.08761	10.2525	7.37119	Up	3.35572	3.17273	-4.08253	-2.76288	1.0439e-269	3	3	2	4
G3UYU0	G3UYU0		Mex3a	-0.670818	#VALUE!	-0.451032	-0.370046		-0.321802	NaN	0.183963	0.160662	2.0146e-08	2	0	2	2
G3UYW1;Q6VNB8;G3UYV1;Q6VNB8-2	G3UYW1;Q6VNB8	WD repeat and FYVE domain-containing protein 3	Wdfy3	#VALUE!	0.0161989	0.357155	0.371074		NaN	0.0130691	-0.138188	-0.119228	8.1249e-38	0	5	18	4
P63013-2;G3UZ44;P63013;A2APZ7;Q06348;Q9CY80;O08934;O35137;O88933;O70137;O35602;Q8C8B0;A2AIK5;O09113;A2AG22;O35690;Q62066	P63013-2;G3UZ44;P63013	Paired mesoderm homeobox protein 1	Prrx1	-1.51834	-1.04412	-0.63217	-1.28391		-0.738915	-0.460707	0.256165	0.505789	4.1515e-206	8	5	9	7
Q8BWW9;Q8BWW9-2;G3UZM9;G3UXH4;Q8BWW9-3;G3UYD6	Q8BWW9;Q8BWW9-2;G3UZM9;G3UXH4;Q8BWW9-3	Serine/threonine-protein kinase N2	Pkn2	-0.593192	-0.721609	-0.463435	-0.754654		-0.283597	-0.3166	0.188907	0.305912	9.2914e-83	16	8	9	1
G3X8R0;Q60870	G3X8R0;Q60870	Receptor expression-enhancing protein 5	Reep5	1.77831	1.99049	1.9026	1.83644		0.883543	0.895225	-0.754212	-0.672635	5.8381e-187	34	37	50	40
G3X8R5;Q3UA37	G3X8R5;Q3UA37	Glutamine-rich protein 1	Qrich1	-2.41732	-2.96955	-2.06038	-3.0677		-1.18135	-1.32103	0.82546	1.17945	3.329e-22	2	1	5	4
G3X8T2;H3BIW0;Q0P678;H3BJN4;H3BJJ9;H3BKL4	G3X8T2;H3BIW0;Q0P678	Zinc finger CCCH domain-containing protein 18	Zc3h18	-2.01127	-2.58425	-0.791354	-1.78378		-0.981508	-1.14886	0.319618	0.694568	1.4296e-221	10	9	8	2
G3X8T3;P16675;A2A5J9;A2A5J8;A2A5J6	G3X8T3;P16675	Lysosomal protective protein;Lysosomal protective protein 32 kDa chain;Lysosomal protective protein 20 kDa chain	Ctsa	-1.67103	-1.58677	-1.22332	-1.14166		-0.814057	-0.703173	0.491802	0.452068	0	51	36	64	54
G3X8U3	G3X8U3		2210016F16Rik	0.360965	-0.160026	0.281555	0.046213		0.185993	-0.0656722	-0.108052	0.00345841	2.854e-63	10	6	16	7
G3X8V6;O70458;O70458-2	G3X8V6;O70458;O70458-2	Oncostatin-M-specific receptor subunit beta	Osmr	3.15703	2.05341	2.26292	0.996155		1.56208	0.923339	-0.897839	-0.355294	6.7452e-30	2	6	11	9
O35604;G3X8W9	O35604;G3X8W9	Niemann-Pick C1 protein	Npc1	2.13848	1.37647	2.21255	2.42124		1.06081	0.620868	-0.877765	-0.893491	3.0073e-20	10	2	8	2
G3X8X0;Q05BH3	G3X8X0;Q05BH3		Dhx16	-0.808466	-0.428441	-1.27722	-0.46889		-0.389546	-0.185605	0.513289	0.197991	3.2266e-14	3	4	6	1
G3X8X7;Q920Q4;Q920Q4-2;A2BI90	G3X8X7;Q920Q4;Q920Q4-2	Vacuolar protein sorting-associated protein 16 homolog	Vps16	0.379715	#VALUE!	0.433963	0.589915		0.195222	NaN	-0.168804	-0.201875	2.5217e-21	4	0	7	2
G3X8Y3;Q80UM3	G3X8Y3;Q80UM3	N-alpha-acetyltransferase 15, NatA auxiliary subunit	Naa15	-0.731419	-0.847145	-0.246218	-0.253457		-0.351627	-0.372692	0.102322	0.116631	0	45	32	65	46
G3X914;Q9D5V5;E9PV12;E9Q6Z0	G3X914;Q9D5V5;E9PV12;E9Q6Z0	Cullin-5	Cul5	0.53674	0.335812	1.33413	1.56636		0.272501	0.155879	-0.527616	-0.570636	4.96e-144	19	12	35	27
G3X920;Q9DBR3;Q9DBR3-2;Q9DBR3-3	G3X920;Q9DBR3;Q9DBR3-2;Q9DBR3-3	Armadillo repeat-containing protein 8	Armc8	0.961203	0.42104	0.599203	0.53872		0.481402	0.193961	-0.234669	-0.18254	2.018e-14	5	2	6	5
G3X922	G3X922		Dnajc13	0.669123	0.240519	1.33355	0.312359		0.337654	0.1133	-0.527387	-0.0970543	0	105	83	134	89
Q9JJ80;G3X926	Q9JJ80;G3X926	Ribosome production factor 2 homolog	Rpf2	0.963093	-0.165742	-0.175058	-0.389816		0.482332	-0.0682262	0.0739573	0.168129	4.77e-30	6	3	10	5
G3X928;Q6NZC7	G3X928;Q6NZC7	SEC23-interacting protein	Sec23ip	-0.328347	-0.816025	0.0525275	-0.0962932		-0.153254	-0.358787	-0.0167602	0.057277	4.4297e-178	23	22	29	23
G3X956;Q920B9	G3X956;Q920B9	FACT complex subunit SPT16	Supt16h	1.65599	-0.764884	-0.0240993	-1.16948		0.823342	-0.335936	0.0137839	0.462576	6.3194e-33	11	8	16	2
G3X961;Q921I2;G3UZ63;G3UZG5;G3UZF2	G3X961;Q921I2;G3UZ63;G3UZG5	Kelch domain-containing protein 4	Klhdc4	0.432242	-0.29405	1.10449	-0.319474		0.221073	-0.125557	-0.436081	0.141564	9.9914e-96	1	1	9	1
G3X972	G3X972		Sec24c	-0.943794	-1.18718	-1.0706	-1.19325		-0.456148	-0.524625	0.430927	0.471552	3.0874e-215	40	28	37	32
Q9JM52-3;G3X9G2;Q5SXG3;Q5SXG1;Q9JM52;Q9JM52-2;F7AMS7;J3QM71;J3QP32	Q9JM52-3;G3X9G2;Q5SXG3;Q5SXG1;Q9JM52;Q9JM52-2;F7AMS7	Misshapen-like kinase 1	Mink1	-0.020062	-0.00821045	-0.235075	-2.80158		-0.00153008	0.00216244	0.0978804	1.07895	7.1001e-134	3	2	1	1
G3X9H5;P42859;P42859-2	G3X9H5;P42859;P42859-2	Huntingtin	Htt	-1.2684	0.233048	-1.54617	-1.26854		-0.615906	0.109962	0.620493	0.499986	3.9092e-41	14	3	23	10
G5E911;Q91VU0;G3X9I1;E9Q0W5;E9Q6F0;E9Q8C5	G5E911;Q91VU0;G3X9I1;E9Q0W5	Protein FAM3C	Fam3c	1.67958	1.45713	1.5969	1.63546		0.834954	0.656908	-0.63236	-0.596732	1.298e-182	17	19	26	20
G3X9J4;Q148V7;E9QM90;Q148V7-2;Q148V7-3	G3X9J4;Q148V7;E9QM90;Q148V7-2;Q148V7-3	LisH domain and HEAT repeat-containing protein KIAA1468	2310035C23Rik;Kiaa1468	-0.31284	0.710791	0.781786	0.298535		-0.145621	0.323428	-0.307448	-0.0918327	3.4293e-62	6	8	15	11
G3X9K4;Q8R3Q2	G3X9K4;Q8R3Q2	Serine/threonine-protein phosphatase 6 regulatory subunit 2	Ppp6r2	-1.47036	-2.22503	-1.47964	-1.82626		-0.715296	-0.988361	0.593975	0.710614	4.4709e-54	2	1	2	2
G3X9M0;Q9ER88;Q9ER88-2;G3UWZ6;G3UWM7;G3UZC0;G3UWJ4;G3UWR5;G3UYM6;G3UYP3	G3X9M0;Q9ER88;Q9ER88-2;G3UWZ6;G3UWM7	28S ribosomal protein S29, mitochondrial	Dap3	0.382787	0.414541	0.772122	1.38179		0.196733	0.191057	-0.303597	-0.500932	8.9064e-116	17	10	24	14
G3X9Q0;Q9JKP5;Q8R003;Q3TJQ3	G3X9Q0;Q9JKP5	Muscleblind-like protein 1	Mbnl1	-1.54814	-0.551837	-0.36919	-0.601438		-0.75358	-0.240742	0.151339	0.248049	4.8093e-51	14	16	20	14
P06802;G3X9S2;P06802-2;E9QQ26	P06802;G3X9S2;P06802-2	Ectonucleotide pyrophosphatase/phosphodiesterase family member 1;Alkaline phosphodiesterase I;Nucleotide pyrophosphatase	Enpp1	-5.14883	-4.57616	-5.87713	-6.02013	Down	-2.52566	-2.0389	2.34684	2.29446	5.5058e-54	10	14	6	8
G3X9Y5;E9Q735;E9Q442;D3YXR7;D6RGN7	G3X9Y5;E9Q735		Ube4a	2.2658	1.52441	2.5865	2.30901		1.12347	0.686971	-1.02682	-0.851105	5.6551e-53	12	10	18	6
G3X9Z0;Q8R060;H3BKZ0;H3BJ52;H3BKB9	G3X9Z0;Q8R060;H3BKZ0;H3BJ52;H3BKB9	Protein zwilch homolog	Zwilch	-1.2645	#VALUE!	-0.904134	-1.45876		-0.613984	NaN	0.364572	0.571822	3.7724e-06	2	0	1	1
G3XA17;F7CBP1;F6TW20;F7DAB1;F6UU81;F7CHS2	G3XA17;F7CBP1		Eif4g2	-2.4275	-1.94375	-1.24334	-1.6947		-1.18636	-0.86268	0.499782	0.660929	0	60	32	72	43
Q9D7V9;G3XA18;H3BL13	Q9D7V9;G3XA18;H3BL13	N-acylethanolamine-hydrolyzing acid amidase	Naaa	3.87174	3.59121	4.467	4.32921	Up	1.91384	1.61046	-1.7764	-1.61405	9.4506e-14	4	4	5	5
G3XA59	G3XA59		Lrrc32	6.61323	6.35186	6.02351	5.39867	Up	3.26306	2.84398	-2.39684	-2.01794	1.8088e-107	3	7	14	9
G3XA66;F7C846;P47802;D3Z3F4;D3YVW0;G3XA75;G3UXX9;G3UYJ5;G3UXB5	G3XA66;F7C846;P47802;D3Z3F4;D3YVW0;G3XA75;G3UXX9	Metaxin-1	Mtx1	0.465502	0.648786	0.826945	0.804402		0.237441	0.295723	-0.325449	-0.282877	6.5015e-74	17	11	14	16
G5E819;Q60676;F7BX26	G5E819;Q60676;F7BX26	Serine/threonine-protein phosphatase;Serine/threonine-protein phosphatase 5	Ppp5c	-0.000583054	-0.0281962	0.263306	0.298331		0.00805652	-0.00676763	-0.100778	-0.0917558	5.5097e-303	10	12	19	10
G5E829;F8WHB1;Q9R0K7;Q6Q477;E9Q828;F7AAP4;Q32ME1	G5E829		Atp2b1	2.34831	2.3905	2.19948	2.22221		1.16408	1.07396	-0.872552	-0.818325	0	27	17	38	28
P56395;G5E850;E0CY88	P56395;G5E850	Cytochrome b5	Cyb5a;Cyb5	0.342871	0.467003	-0.458671	-0.483848		0.177089	0.214498	0.187008	0.20364	2.1861e-160	16	12	15	17
G5E866;Q99NB9	G5E866;Q99NB9	Splicing factor 3B subunit 1	Sf3b1	0.187949	0.0606866	-0.000721829	-0.220547		0.100843	0.0329472	0.00446547	0.104202	0	77	102	125	86
G5E870	G5E870		Trip12	-0.565844	-0.787745	-1.13842	-1.09502		-0.270138	-0.346151	0.457962	0.434455	1.9559e-140	29	16	28	11
G5E881;Q3TUH1;G3UYJ1;Q3TUH1-2;G3UWL8;D6RGT1	G5E881;Q3TUH1;G3UYJ1	Mitochondrial translocator assembly and maintenance protein 41 homolog	1500001M20Rik;Tamm41	1.00931	0.219257	1.34013	1.24736		0.505078	0.1038	-0.53001	-0.450163	1.8316e-29	6	3	11	6
G5E884;O88643	G5E884;O88643	Serine/threonine-protein kinase PAK 1	Pak1	-0.80835	-0.609305	0.178342	0.429862		-0.389489	-0.26642	-0.0669109	-0.14143	0	8	4	11	2
G5E895;D3Z494	G5E895;D3Z494		Akr1b10	1.78925	1.85741	1.63248	2.20367		0.888928	0.835762	-0.646541	-0.811321	1.968e-57	4	4	5	2
G5E896;Q3UJB9;Q3UJB9-2;D6RE33;F6ZJ27;F6V5I7	G5E896;Q3UJB9;Q3UJB9-2;D6RE33	Enhancer of mRNA-decapping protein 4	Edc4	-2.25729	-2.54737	-1.47868	-2.30934		-1.10259	-1.13239	0.593593	0.893052	0	64	53	80	45
G5E897	G5E897		Kdelc2	3.48619	3.30883	4.18276	3.74733	Up	1.72408	1.48429	-1.6631	-1.3943	5.2424e-235	9	9	29	10
G5E899;P22777	G5E899;P22777	Plasminogen activator inhibitor 1	Serpine1	5.54405	4.14962	7.08154	4.3116	Up	2.73686	1.85997	-2.81858	-1.6074	2.4003e-16	4	2	10	6
G5E8A0;Q8CI95	G5E8A0;Q8CI95	Oxysterol-binding protein;Oxysterol-binding protein-related protein 11	Osbpl11	0.173975	0.355459	0.436	0.0581219		0.0939657	0.164658	-0.169615	-0.00103909	9.4272e-282	6	3	4	4
G5E8A7;Q80XS6	G5E8A7;Q80XS6	Protein Smaug homolog 2	Samd4b	2.62737	1.29202	-0.612416	-0.158564		1.30141	0.583134	0.248292	0.0807941	4.1593e-25	3	2	6	6
G5E8C4;Q8BRH0;Q8BRH0-2;D3Z2Z3	G5E8C4;Q8BRH0	Transmembrane and TPR repeat-containing protein 3	Tmtc3	2.25056	2.65314	2.66854	2.63985	Up	1.11597	1.19131	-1.05953	-0.976049	4.8236e-59	12	5	16	5
G5E8D6;Q9WVJ9;E9Q3N9;E9Q3F3;F6Z1C2	G5E8D6;Q9WVJ9;E9Q3N9;E9Q3F3;F6Z1C2	EGF-containing fibulin-like extracellular matrix protein 2	Efemp2	0.807535	#VALUE!	0.0521246	0.771177		0.405775	NaN	-0.0165995	-0.27033	5.6996e-08	2	0	2	1
G5E8E1	G5E8E1		Lrrfip1	-1.79907	-1.86642	-1.12469	-1.54766		-0.877075	-0.828127	0.45249	0.6054	0	5	3	2	2
G5E8F4	G5E8F4		Fpgt	-3.433	#VALUE!	-1.72058	1.04192		-1.68121	NaN	0.690015	-0.37258	3.7345e-09	1	0	3	1
G5E8I8;Q8CGZ0	G5E8I8;Q8CGZ0	Calcium homeostasis endoplasmic reticulum protein	Cherp	0.401652	0.3747	0.416106	0.0162245		0.206018	0.173255	-0.161685	0.0147838	1.8973e-43	15	15	8	14
G5E8J3;Q8K1X1	G5E8J3;Q8K1X1	WD repeat-containing protein 11	Wdr11	2.55805	2.40214	2.97942	2.98937	Up	1.2673	1.07916	-1.18344	-1.10805	6.6408e-109	5	9	22	7
G5E8J4;Q62136	G5E8J4;Q62136	Tyrosine-protein phosphatase non-receptor type 21	Ptpn21	#VALUE!	-1.27207	-1.0075	3.44621		NaN	-0.562559	0.405775	-1.28058	3.1598e-124	0	1	1	1
Q8CFE4;G5E8J9;Q8CFE4-2;Q80UY7	Q8CFE4;G5E8J9	SCY1-like protein 2	Scyl2	-1.25594	-1.10875	1.14071	-0.990425		-0.609773	-0.489585	-0.450518	0.394953	2.5067e-18	4	2	6	3
G5E8R1;E9Q455;G5E8R0	G5E8R1;E9Q455;G5E8R0		Tpm1	-0.610908	-0.568553	-1.93063	-1.55269		-0.292316	-0.248211	0.773743	0.607295	0	4	5	8	7
G5E8R4;Q922D4;Q922D4-2;Q922D4-3;Q922D4-4	G5E8R4;Q922D4;Q922D4-2;Q922D4-3;Q922D4-4	Serine/threonine-protein phosphatase 6 regulatory subunit 3	Ppp6r3	-2.40578	-2.73798	-1.83366	-1.71999		-1.17566	-1.21756	0.735089	0.670478	4.5038e-128	18	16	23	15
G5E8R8;Q6P5G6	G5E8R8;Q6P5G6	UBX domain-containing protein 7	Ubxn7	-2.43357	-2.79142	-1.2724	-2.00658		-1.18935	-1.24144	0.511367	0.778713	4.4981e-21	6	4	6	3
Q9JJT9;G5E8V8;F6RPD4	Q9JJT9;G5E8V8	Phosphorylated adapter RNA export protein	Phax	-1.52275	-2.40971	-2.11852	-2.52936		-0.741083	-1.07088	0.848638	0.976144	6.5161e-16	2	6	3	2
G5E8V9	G5E8V9		Arfip1	0.388408	0.0754853	0.621671	-0.315664		0.1995	0.0395595	-0.243626	0.140124	0	8	14	21	13
G5E920;O54879;A2AP78	G5E920;O54879;A2AP78	High mobility group protein B3	Gm6104;Hmgb3	-3.7837	-2.75159	-3.95549	-3.77389	Down	-1.85381	-1.22364	1.58087	1.44615	4.4219e-107	5	7	4	7
G5E924;Q8R081;G3UY38;G3UY56;G3UYY3	G5E924;Q8R081;G3UY38	Heterogeneous nuclear ribonucleoprotein L	Hnrnpl	-0.093997	-0.269662	-0.0287566	0.152401		-0.0379175	-0.11466	0.0156403	-0.0366443	0	56	38	65	50
Q8K202;Q8K202-2;G8JL51;Q8K202-3	Q8K202;Q8K202-2;G8JL51;Q8K202-3	DNA-directed RNA polymerase I subunit RPA49	Polr1e	#VALUE!	0.171431	-1.13921	-0.769151		NaN	0.0824301	0.458277	0.311387	4.3297e-07	0	2	2	2
H3BJ07;Q8R088;H3BJ82;K3W4Q3;H3BJ12;Q8R088-3;H3BJN5;H3BKI7;K3W4N3;Q8R088-2;H3BJI3	H3BJ07;Q8R088;H3BJ82;K3W4Q3;H3BJ12;Q8R088-3;H3BJN5	Golgi phosphoprotein 3-like	Golph3l	1.54903	1.78089	3.02974	2.63024		0.770702	0.801573	-1.2035	-0.972421	4.8436e-76	1	3	1	4
H3BJW3;H3BJ30;Q6NVF9;H3BKW0;H3BLM9	H3BJW3;H3BJ30;Q6NVF9;H3BKW0	Cleavage and polyadenylation specificity factor subunit 6	Cpsf6	-0.318844	-0.183801	0.0596014	0.0684574		-0.148577	-0.0762955	-0.0195799	-0.00494239	0	21	13	22	17
Q60875;H3BKH9;H3BJ40;H3BJ45;H3BJX8;Q60875-4;H3BJU7;Q60875-5;Q60875-3;Q60875-2;H3BL15;H3BJ59;H3BLF9;H3BIX8;H3BLJ1;H3BJ48;H3BJM4	Q60875;H3BKH9;H3BJ40;H3BJ45;H3BJX8;Q60875-4;H3BJU7;Q60875-5;Q60875-3;Q60875-2	Rho guanine nucleotide exchange factor 2	Arhgef2	-1.94466	-2.09385	-0.401633	-0.647798		-0.948725	-0.929748	0.164271	0.265557	0	54	47	58	62
Q9DB70;H3BJ77	Q9DB70;H3BJ77	FUN14 domain-containing protein 1	Fundc1	#VALUE!	1.35054	1.74421	2.12426		NaN	0.609282	-0.69108	-0.78133	3.1756e-05	0	3	7	4
H3BJQ9;P53564;H3BKF6;P53564-3;E9QKE9;P53564-2;H3BK24;P53564-4;H3BJ26;H3BL09	H3BJQ9;P53564;H3BKF6;P53564-3;E9QKE9;P53564-2;H3BK24;P53564-4;H3BJ26;H3BL09	Homeobox protein cut-like 1	Cux1	-0.0655755	-1.88257	-0.00613018	0.0735978		-0.0239297	-0.835342	0.00662128	-0.00688367	3.1969e-17	1	3	2	2
H3BK01;K3W4L1;Q8R2K4	H3BK01;K3W4L1;Q8R2K4	TAF6-like RNA polymerase II p300/CBP-associated factor-associated factor 65 kDa subunit 6L	Taf6l	0.03707	0.591197	-0.672252	-0.778988		0.0265876	0.269991	0.272143	0.315102	0.00011561	2	2	3	2
H3BK65;P42567;F6W2Q5;Q5JC28;P42567-2;H3BJB8;H3BLE4	H3BK65;P42567;F6W2Q5;Q5JC28;P42567-2	Epidermal growth factor receptor substrate 15	Eps15	-0.986246	-0.966765	-1.78352	#VALUE!		-0.47704	-0.426141	0.715103	#VALUE!	9.0422e-150	15	6	5	0
Q8R1J9;H3BK73;Q8R1J9-2;P0C7W3	Q8R1J9;H3BK73;Q8R1J9-2	Torsin-2A	Tor2a	-0.534305	-0.145091	-0.168863	0.105783		-0.254616	-0.0589989	0.071488	-0.0190387	3.0146e-10	6	2	5	2
H3BKH6;Q9R0P3;H3BJL6;H3BLJ9;H3BJP2;H3BK43;H3BJC6;H3BL99	H3BKH6;Q9R0P3;H3BJL6;H3BLJ9;H3BJP2;H3BK43	S-formylglutathione hydrolase	Esd	-1.28847	-1.38756	-1.05957	-1.03806		-0.625778	-0.61416	0.426533	0.412944	0	63	86	68	81
Q80YV2;Q80YV2-2;H3BKM2;D3Z3D0;D3Z0B2	Q80YV2;Q80YV2-2;H3BKM2;D3Z3D0	Nuclear-interacting partner of ALK	Zc3hc1	-2.70906	-2.67706	-1.70912	-1.46877		-1.32492	-1.19034	0.685447	0.575603	2.4484e-127	2	1	8	2
H3BL08;Q8C172	H3BL08;Q8C172	Ceramide synthase 6	Lass6;Cers6	#VALUE!	-1.17503	-0.743184	-0.754963		NaN	-0.519197	0.300417	0.306029	2.0212e-10	0	2	9	3
H3BL37;O08784;H3BIX0;Q05CS0;H3BK88	H3BL37;O08784;H3BIX0;Q05CS0	Treacle protein	Tcof1	-1.47074	-2.24333	-0.414528	-1.79415		-0.715486	-0.996542	0.169412	0.698485	0	30	53	47	52
Q3UZR5;Q80XR2;H3BL44;Q8BMS7;H3BIX7;H3BLI6;H3BLC2;H3BJY0;H3BKB1;H3BJJ5;H3BK57;H3BJ99	Q3UZR5;Q80XR2;H3BL44;Q8BMS7;H3BIX7;H3BLI6	Calcium-transporting ATPase type 2C member 1	Atp2c1	1.71649	-0.847646	#VALUE!	0.768412		0.853117	-0.372916	#VALUE!	-0.269286	8.8543e-10	1	1	0	1
P58281-2;H7BX01;P58281;E0CXD1;F6U775	P58281-2;H7BX01;P58281;E0CXD1	Dynamin-like 120 kDa protein, mitochondrial;Dynamin-like 120 kDa protein, form S1	Opa1	1.26737	1.21172	1.46816	1.41802		0.632082	0.547252	-0.581044	-0.514614	8.1251e-145	20	18	20	28
Q8BMZ5;H7BX14;Q8BMZ5-2;D6RH65;D3YWG5;D3YY06	Q8BMZ5;H7BX14;Q8BMZ5-2;D6RH65;D3YWG5;D3YY06	tRNA-splicing endonuclease subunit Sen34	Tsen34	1.26604	0.194221	1.21678	1.1184		0.63143	0.0926134	-0.480841	-0.401463	8.6549e-10	5	1	4	2
H7BX23;Q6W3F0;Q6W3F0-2;F6R2A2;Q6W3F0-3;D6RFD3	H7BX23;Q6W3F0;Q6W3F0-2;F6R2A2;Q6W3F0-3	Prolyl 4-hydroxylase subunit alpha-3	P4ha3	5.65481	4.2119	6.2845	4.67894	Up	2.79138	1.8878	-2.50087	-1.74613	2.5168e-51	8	2	20	9
Q6A065;H7BX26;Q6A065-3;Q6A065-2	Q6A065;H7BX26	Centrosomal protein of 170 kDa	Cep170	-3.62802	0.624495	-3.02074	0.740887		-1.7772	0.284869	1.20827	-0.258891	6.8213e-181	7	4	13	2
H7BX59;Q9WU56;Q9WU56-3;Q9WU56-2;Q9WU56-4;D3Z092;D3YWU8	H7BX59;Q9WU56;Q9WU56-3;Q9WU56-2;Q9WU56-4	Pseudouridine synthase;tRNA pseudouridine synthase A, mitochondrial	Pus1	-1.94319	-1.31595	-1.34629	-1.80402		-0.948002	-0.582166	0.540821	0.702214	4.5034e-128	3	1	7	5
P47934;H7BX88;F7BF80;A2AWJ5;B7ZDD7	P47934;H7BX88	Carnitine O-acetyltransferase	Crat	1.68697	1.81351	2.19226	2.29052		0.838589	0.816149	-0.869675	-0.844121	3.8748e-17	1	1	5	2
H7BX95;Q6PDM2;Q6PDM2-2;Q6PDM2-3;F7AI47;F6QXN3	H7BX95;Q6PDM2;Q6PDM2-2;Q6PDM2-3	Serine/arginine-rich splicing factor 1	Srsf1	0.771693	0.670806	0.99007	0.887088		0.388134	0.305562	-0.390472	-0.314105	4.3273e-215	34	28	32	34
O88738;H9KUX8;O88738-2;O88738-3;J3QP64	O88738;H9KUX8;O88738-2;O88738-3	Baculoviral IAP repeat-containing protein 6	Birc6	-0.589339	-0.513305	-0.508871	-0.465225		-0.281702	-0.223525	0.207018	0.196607	0	152	120	274	168
Q99JN2-2;H9KV05;Q99JN2;Q9D2D9;Q91XA8;D3Z7N9;D3Z2R6;D3YZH5	Q99JN2-2;H9KV05;Q99JN2	Kelch-like protein 22	Klhl22	-1.02246	#VALUE!	-2.10221	-1.60127		-0.494861	NaN	0.842134	0.625645	5.1754e-99	7	0	13	9
Q9JI46;I1E4X7;H3BLR8;B2KF67;H3BJY4	Q9JI46;I1E4X7;H3BLR8;B2KF67	Diphosphoinositol polyphosphate phosphohydrolase 1	Nudt3	0.0191729	-0.64818	-0.274094	-0.418945		0.0177795	-0.28379	0.113434	0.179129	3.8116e-33	7	3	14	9
I3ITR1;Q9D924	I3ITR1;Q9D924	Iron-sulfur cluster assembly 1 homolog, mitochondrial	Isca1	2.9872	2.68577	#VALUE!	2.6235	Up	1.47851	1.20589	#VALUE!	-0.969876	2.5716e-11	2	3	0	2
Q549C9;P02340;Q80ZA1;I7HIK9	Q549C9;P02340;Q80ZA1;I7HIK9	Cellular tumor antigen p53	Trp53;Tp53	-4.75324	-5.68177	-4.2971	-5.5036	Down	-2.33097	-2.53291	1.71703	2.0994	4.9421e-55	11	3	15	6
Q9D8T0;I7HLV5;I7HPY1;I7HJS7;J3JS95	Q9D8T0;I7HLV5;I7HPY1;I7HJS7;J3JS95	Protein FAM3A	Fam3a	1.59049	1.21878	1.61676	1.37185		0.791106	0.550408	-0.640276	-0.497181	4.0538e-13	2	4	5	3
J3KMG3	J3KMG3			1.73509	1.55555	1.56534	0.268727		0.862273	0.700884	-0.61978	-0.080576	1.9064e-251	2	2	3	2
J3KMQ6;Q9CYI0;B1AQG3	J3KMQ6;Q9CYI0	Protein Njmu-R1		2.73846	1.39427	2.69277	1.65074		1.35609	0.62882	-1.06918	-0.602504	1.1237e-46	2	3	5	4
J3QJU7	J3QJU7			-3.30271	-2.31927	#VALUE!	-1.4044		-1.6171	-1.03047	#VALUE!	0.551294	9.4026e-06	2	2	0	1
J3QM46;J3QQ36;Q80XJ3	J3QM46;J3QQ36;Q80XJ3	Tetratricopeptide repeat protein 28	Ttc28	0.877502	#VALUE!	2.21096	4.36021		0.440208	NaN	-0.877129	-1.62576	5.8108e-19	1	0	1	1
J3QN19;P20664	J3QN19;P20664	DNA primase small subunit	Prim1	-0.32597	-0.280306	0.292884	0.237989		-0.152083	-0.119416	-0.112568	-0.0689675	1.8297e-22	4	4	6	6
J3QN89;Q3TJ22	J3QN89;Q3TJ22		Aamp	-0.721784	-1.11665	-1.2246	0.170271		-0.346885	-0.493114	0.492315	-0.0433931	5.2453e-38	2	2	8	2
J3QNB1;Q6ZQ58;Q6ZQ58-2;Q9D423;E9PYM4	J3QNB1;Q6ZQ58	La-related protein 1	Larp1	-2.29664	-2.33064	-2.31165	-2.29739		-1.12196	-1.03555	0.92562	0.888539	0	42	45	59	38
J3QNG0;P16460	J3QNG0;P16460	Argininosuccinate synthase	Ass1	-1.07792	-1.61417	-1.37034	#VALUE!		-0.522157	-0.715415	0.550408	#VALUE!	1.2816e-13	2	3	5	0
Q9Z2A5;Q9Z2A5-2;J3QNU1;Q4FCQ7	Q9Z2A5;Q9Z2A5-2;J3QNU1;Q4FCQ7	Arginyl-tRNA--protein transferase 1	Ate1	1.86966	1.18264	2.64719	1.32939		0.928503	0.534261	-1.05101	-0.481143	1.0005e-24	2	1	3	2
J3QNY1;Q8BG05-2;B2RXM2;E9Q7H5	J3QNY1;Q8BG05-2;B2RXM2;E9Q7H5		Gm6793;Gm8991	-1.01491	-1.39503	-0.715748	-0.634746		-0.491145	-0.617499	0.28948	0.260628	0	8	2	9	2
J3QPE8;Q60931;J3QMG3	J3QPE8;Q60931;J3QMG3	Voltage-dependent anion-selective channel protein 3	Vdac3	0.44504	0.3361	0.1475	0.216372		0.227371	0.156008	-0.0546171	-0.0608036	2.0665e-147	14	12	17	11
K3W4P2;Q6P4S8	K3W4P2;Q6P4S8	Integrator complex subunit 1	Ints1	-0.501096	-0.465669	-0.646384	-0.501387		-0.238272	-0.20224	0.261832	0.210264	1.438e-88	14	13	10	19
P18572;P18572-2;K3W4Q8;J3QP71	P18572;P18572-2;K3W4Q8;J3QP71	Basigin	Bsg	-1.46137	-1.8442	-0.366907	-0.332613		-0.710874	-0.818198	0.15043	0.146525	2.8807e-90	13	25	12	19
K3W4Q9;Q8BH60;Q8BH60-2	K3W4Q9;Q8BH60;Q8BH60-2	Golgi-associated PDZ and coiled-coil motif-containing protein	Gopc	2.09374	0.938177	0.295937	0.254776		1.03879	0.42503	-0.113785	-0.0753071	8.5236e-18	2	3	8	5
Q6URW6-3;K3W4R2;Q6URW6;Q6URW6-2	Q6URW6-3;K3W4R2;Q6URW6;Q6URW6-2	Myosin-14	Myh14	0.89409	0.689301	1.91262	1.58729		0.448372	0.313826	-0.758209	-0.578542	0	9	9	11	13
K3W4R5;A2AGT5;A2AGT5-3;A2AGT5-2	K3W4R5;A2AGT5;A2AGT5-3;A2AGT5-2	Cytoskeleton-associated protein 5	Ckap5	-1.91325	-2.42199	-1.50664	-3.08922		-0.93327	-1.07637	0.604736	1.18758	0	111	92	121	99
K4DI67;Q6ZQK0;Q80W41	K4DI67;Q6ZQK0;Q80W41	Condensin-2 complex subunit D3	Ncapd3	-0.603593	-0.21823	-0.281113	-0.880492		-0.288717	-0.0916789	0.116232	0.353436	6.7308e-31	6	9	14	10
O08528;E9Q5B5;E9Q9M6	O08528;E9Q5B5	Hexokinase-2	Hk2	-2.1627	-1.98666	-2.49064	-1.96471		-1.05604	-0.881853	0.996967	0.762902	0	53	23	41	40
O08529	O08529	Calpain-2 catalytic subunit	Capn2	0.374077	0.264904	0.652182	0.682284		0.192447	0.124196	-0.255787	-0.236758	0	98	72	131	108
O08539;Q6P1B9;O08539-2	O08539;Q6P1B9;O08539-2	Myc box-dependent-interacting protein 1	Bin1	0.1915	0.821627	-0.176777	0.542319		0.102591	0.372952	0.0746424	-0.1839	0	43	40	54	38
O08547;E9Q6R3;D6RES2	O08547;E9Q6R3	Vesicle-trafficking protein SEC22b	Sec22b	2.01831	1.94644	1.64491	1.62421		1.00166	0.875544	-0.651496	-0.592484	0	38	53	62	60
O08553	O08553	Dihydropyrimidinase-related protein 2	Dpysl2	0.675843	0.417368	0.253307	0.264528		0.340961	0.192321	-0.096792	-0.0789902	0	95	60	86	87
O08579;I7HJS1;Q3THM8;B7FAU5;D6RFS0	O08579;I7HJS1;Q3THM8;B7FAU5	Emerin	Emd	-0.6455	-0.573081	-0.723144	-1.27987		-0.309342	-0.250234	0.292428	0.504264	0	18	11	31	9
O08582	O08582	GTP-binding protein 1	Gtpbp1	-0.0936359	0.0264219	0.61983	0.532005		-0.0377398	0.0176369	-0.242891	-0.180005	6.7628e-188	10	8	14	12
O08583;G3X9I4;Q9JJW6;Q9JJW6-2;O08583-2	O08583;G3X9I4;Q9JJW6;Q9JJW6-2;O08583-2	THO complex subunit 4;RNA and export factor-binding protein 2	Alyref;Alyref2;Refbp2	1.87136	2.07208	2.24247	2.33126		0.929337	0.931683	-0.88969	-0.859509	0	24	15	37	18
O08586	O08586	Phosphatidylinositol 3,4,5-trisphosphate 3-phosphatase and dual-specificity protein phosphatase PTEN	Pten	#VALUE!	-0.741293	-0.575051	-0.604973		NaN	-0.325395	0.233397	0.249385	3.536e-06	0	2	2	2
O08599;O08599-2	O08599;O08599-2	Syntaxin-binding protein 1	Stxbp1	-0.32395	-0.0759092	-0.67315	-0.751871		-0.15109	-0.0280868	0.272501	0.304861	1.6642e-125	29	8	32	8
O08600	O08600	Endonuclease G, mitochondrial	Endog	3.46232	2.92591	2.72526	#VALUE!	Up	1.71233	1.31319	-1.08213	#VALUE!	6.3076e-11	4	2	5	0
O08601-2;O08601	O08601-2;O08601	Microsomal triglyceride transfer protein large subunit	Mttp	-0.394516	-0.385071	-0.437625	-0.389138		-0.185819	-0.166227	0.178619	0.167872	2.1421e-08	1	2	1	2
O08648;O08648-2	O08648;O08648-2	Mitogen-activated protein kinase kinase kinase 4	Map3k4	-1.67159	-0.420042	-1.28128	-1.1681		-0.814336	-0.181853	0.514905	0.462052	5.1095e-22	2	1	1	2
O08663	O08663	Methionine aminopeptidase 2	Metap2	0.232708	0.165632	0.13714	0.387541		0.122871	0.0798389	-0.0504874	-0.125447	5.8897e-116	10	13	24	11
O08709	O08709	Peroxiredoxin-6	Prdx6	7.41544	7.06082	10.791	6.33457	Up	3.65787	3.16076	-4.29718	-2.37139	0	2	1	8	2
O08738	O08738	Caspase-6;Caspase-6 subunit p18;Caspase-6 subunit p11	Casp6	-1.27844	-1.44203	-1.77756	-0.341576		-0.620845	-0.638501	0.712728	0.14991	6.3717e-16	5	3	4	2
O08749	O08749	Dihydrolipoyl dehydrogenase, mitochondrial	Dld	0.474192	0.649048	0.430955	0.276491		0.241718	0.295841	-0.167604	-0.0835081	0	41	68	49	42
O08750	O08750	Nuclear factor interleukin-3-regulated protein	Nfil3	-3.31759	-1.93912	-0.949389	#VALUE!		-1.62442	-0.860609	0.382612	#VALUE!	2.7489e-22	1	1	1	0
O08795-2;O08795	O08795-2;O08795	Glucosidase 2 subunit beta	Prkcsh	1.05237	1.16744	0.630896	0.62372		0.526269	0.527471	-0.247303	-0.214642	0	64	40	51	34
O08797;F6V5V4;O08806;Q80UK5;Q8BMT0;Q8VHQ1	O08797		Serpinb9	-2.23266	-1.67961	-1.18788	-0.494116		-1.09046	-0.744656	0.477677	0.207518	1.298e-62	13	4	13	4
O08807;B1AZS9	O08807;B1AZS9	Peroxiredoxin-4	Prdx4	3.52514	3.76835	3.9378	4.16006	Up	1.74326	1.68961	-1.56546	-1.55017	0	50	51	58	45
O08848	O08848	60 kDa SS-A/Ro ribonucleoprotein	Trove2	-1.84235	-1.9043	-1.80331	-1.38899		-0.898377	-0.845054	0.722991	0.545474	4.8638e-71	7	6	12	10
O08915;D3YW40	O08915;D3YW40	AH receptor-interacting protein	Aip	-1.39599	-1.4666	-2.01929	-2.35412		-0.678695	-0.64948	0.809085	0.909965	3.6769e-68	26	7	18	14
O08917;G3UYU4;G3UWW8;G3UZZ5;G3XA73	O08917;G3UYU4;G3UWW8;G3UZZ5	Flotillin-1	Flot1	1.67777	#VALUE!	2.08552	1.99623		0.834064	NaN	-0.827128	-0.73298	6.851e-70	8	0	8	6
O08989;D3Z2V6	O08989;D3Z2V6	Ras-related protein M-Ras	Mras	5.61319	2.63769	5.95665	#VALUE!	Up	2.77089	1.18441	-2.37019	#VALUE!	2.4243e-20	2	2	3	0
O08992;Q3TMX0;H3BLG5;A2AKJ6;A2AKJ9;A2AKJ5	O08992;Q3TMX0;H3BLG5;A2AKJ6;A2AKJ9	Syntenin-1	Sdcbp	0.963721	0.822625	0.785772	0.597215		0.482642	0.373398	-0.309038	-0.204632	1.9961e-290	12	9	19	14
O09005;Q3TS87	O09005	Sphingolipid delta(4)-desaturase DES1	Degs1	1.28001	1.52301	0.742183	1.01035		0.638306	0.686344	-0.291663	-0.360657	3.0586e-124	13	7	16	10
Q9D3L3;O09044;B0R030;E9Q8A1;B0R029;P60879	Q9D3L3;O09044;B0R030;E9Q8A1;B0R029	Synaptosomal-associated protein;Synaptosomal-associated protein 23	Snap23	0.577709	0.601089	0.585728	0.42624		0.292664	0.274411	-0.229298	-0.140062	0	23	16	27	11
O09061	O09061	Proteasome subunit beta type-1	Psmb1	-0.169135	0.00337497	-0.50071	-0.320515		-0.0748968	0.00733906	0.203765	0.141956	0	47	45	64	61
O09106;D3YYI8	O09106;D3YYI8	Histone deacetylase 1;Histone deacetylase	Hdac1;Gm10093	-0.330436	-0.755117	-0.935759	-1.2048		-0.154281	-0.331572	0.377179	0.475915	0	19	9	33	13
O09110;O09110-2;P70236;A2AGS2	O09110;O09110-2	Dual specificity mitogen-activated protein kinase kinase 3	Map2k3	-2.74778	-2.21901	-3.50911	-2.78437	Down	-1.34399	-0.985673	1.40294	1.07245	1.5191e-21	5	6	10	5
O09111	O09111	NADH dehydrogenase [ubiquinone] 1 beta subcomplex subunit 11, mitochondrial	Ndufb11	0.387642	1.07381	-0.946612	-0.639526		0.199123	0.485633	0.381505	0.262433	1.066e-06	5	1	1	2
O09131;Q8K2Q2;D3Z1Q9	O09131	Glutathione S-transferase omega-1	Gsto1	-1.94754	-2.03552	-0.663549	-0.385055		-0.950146	-0.903684	0.268674	0.16633	0	111	76	114	97
O09164	O09164	Extracellular superoxide dismutase [Cu-Zn]	Sod3	6.88505	5.67544	9.30714	9.47336	Up	3.39684	2.54174	-3.70572	-3.55678	2.2125e-22	4	2	3	2
O09167;Q9CQM8;D3YX83;D3YX47;D3Z4H7	O09167;Q9CQM8;D3YX83;D3YX47	60S ribosomal protein L21	Rpl21;Gm9104;Rpl21-ps6	-0.0785093	0.082389	0.0597848	-0.0105278		-0.0302951	0.0426443	-0.019653	0.024887	3.1318e-262	44	38	45	44
O09172;H3BJA3;F6VNW5	O09172;H3BJA3	Glutamate--cysteine ligase regulatory subunit	Gclm	-0.130639	-0.17157	-0.593781	-0.342609		-0.0559512	-0.0708301	0.240864	0.1503	7.3683e-237	15	14	17	16
O09174	O09174	Alpha-methylacyl-CoA racemase	Amacr	-0.51482	#VALUE!	-0.827138	-0.826592		-0.245027	NaN	0.333882	0.33308	1.5427e-58	1	0	4	2
O35071;E9Q9B0;Q3V3Y9	O35071;E9Q9B0	Kinesin-like protein KIF1C	Kif1c	0.410533	0.0827025	0.272165	0.064971		0.210389	0.0427844	-0.10431	-0.00362565	4.5016e-27	2	6	10	8
O35074;Q8BXC0	O35074;Q8BXC0	Prostacyclin synthase	Ptgis	-6.15394	-5.68383	-7.34589	-6.83862	Down	-3.02034	-2.53383	2.93231	2.60357	0	69	97	41	53
O35075	O35075	Down syndrome critical region protein 3 homolog	Dscr3	0.422417	0.33204	1.18275	1.27359		0.216238	0.154194	-0.467274	-0.460072	1.5197e-29	3	7	7	7
O35083;G3UWV6	O35083	1-acyl-sn-glycerol-3-phosphate acyltransferase alpha	Agpat1	0.0364943	0.473397	0.760617	1.10033		0.0263043	0.217355	-0.29901	-0.394638	1.1283e-19	1	2	8	2
O35114	O35114	Lysosome membrane protein 2	Scarb2	4.28651	4.12336	4.72973	4.23963	Up	2.11796	1.84824	-1.88114	-1.58022	1.9401e-171	14	8	25	18
O35129;F6QPR1;F6Q8V7	O35129;F6QPR1	Prohibitin-2	Phb2	-0.155243	-0.301738	-2.46315	-2.75739		-0.0680598	-0.128992	0.98601	1.06226	0	40	46	47	50
O35130	O35130	Ribosomal RNA small subunit methyltransferase NEP1	Emg1	1.13168	0.975241	-0.00144316	-0.0370941		0.565305	0.44159	0.00475299	0.03492	1.3243e-126	17	11	16	11
O35134	O35134	DNA-directed RNA polymerase I subunit RPA1	Polr1a	-0.0783596	-0.563303	-1.06011	-1.16948		-0.0302214	-0.245865	0.426748	0.462576	1.343e-68	7	1	30	2
O35166;A2A9I0	O35166;A2A9I0	Golgi SNAP receptor complex member 2	Gosr2	3.49249	3.69239	2.97121	3.36569	Up	1.72718	1.65567	-1.18017	-1.25017	8.8579e-63	9	15	27	16
O35218	O35218	Cleavage and polyadenylation specificity factor subunit 2	Cpsf2	-1.3155	-1.51364	-2.57719	-2.83095		-0.639085	-0.670497	1.03147	1.09004	3.8115e-54	2	6	11	8
O35226;O35226-4	O35226;O35226-4	26S proteasome non-ATPase regulatory subunit 4	Psmd4	-0.0389917	-0.501905	-0.161278	0.172555		-0.0108464	-0.21843	0.0684644	-0.0442557	1.657e-253	21	26	24	19
O35239	O35239	Tyrosine-protein phosphatase non-receptor type 9	Ptpn9	1.90381	1.98997	3.00556	2.67851		0.945308	0.894992	-1.19387	-0.990653	1.34e-28	4	4	13	7
O35286	O35286	Putative pre-mRNA-splicing factor ATP-dependent RNA helicase DHX15	Dhx15	-1.39974	-0.989403	-1.67566	-1.70917		-0.680544	-0.436256	0.672108	0.666393	0	76	35	84	57
O35295	O35295	Transcriptional activator protein Pur-beta	Purb	1.7433	0.535014	0.646352	1.51899		0.866315	0.244887	-0.253464	-0.552749	0	11	8	14	9
Q9D8S5;O35326	Q9D8S5;O35326	Serine/arginine-rich splicing factor 5	Srsf5	-0.794446	-1.05726	-0.591024	-0.63634		-0.382645	-0.466576	0.239765	0.26123	0	11	4	17	8
O35343;D3YTN1	O35343	Importin subunit alpha-4	Kpna4	0.652606	0.645893	0.922202	0.847918		0.329526	0.29443	-0.363419	-0.299312	0	24	22	23	28
O35344	O35344	Importin subunit alpha-3	Kpna3	0.443537	0.291163	0.565124	0.574742		0.226632	0.135929	-0.221085	-0.196145	0	38	27	29	31
O35345;Q4FJZ2	O35345;Q4FJZ2	Importin subunit alpha-7;Importin subunit alpha	Kpna6	0.290024	0.355459	0.203451	-0.00301093		0.151079	0.164658	-0.0769193	0.0220482	0	13	9	20	10
O35350	O35350	Calpain-1 catalytic subunit	Capn1	-1.23802	-1.65708	-1.62511	-1.43918		-0.600949	-0.734587	0.651959	0.564427	0	36	35	59	41
O35375;O35375-4;O35375-3;O35375-2;O35375-6;O35375-5	O35375;O35375-4;O35375-3;O35375-2;O35375-6;O35375-5	Neuropilin-2	Nrp2	4.97996	4.22721	3.4055	0.651928	Up	2.45925	1.89464	-1.35328	-0.225295	1.8384e-41	6	8	5	4
O35379;E9Q1I5	O35379	Multidrug resistance-associated protein 1	Abcc1	-0.132347	-0.779424	-0.334808	-0.754037		-0.0567913	-0.342433	0.137635	0.305679	1.614e-45	5	5	14	8
O35382;Q8C391;Q9CXE1	O35382;Q8C391;Q9CXE1	Exocyst complex component 4	Exoc4	0.3656	0.49912	0.419267	0.717737		0.188274	0.22885	-0.162945	-0.250148	4.7761e-200	6	2	32	23
O35387	O35387	HCLS1-associated protein X-1	Hax1	-0.219241	-1.27322	0.0395155	-0.106926		-0.0995563	-0.563071	-0.0115735	0.0612924	1.3748e-46	6	3	4	7
O35405	O35405	Phospholipase D3	Pld3	2.23443	#VALUE!	1.22918	1.09376		1.10802	NaN	-0.485782	-0.392156	2.2721e-22	6	0	6	4
O35435;E9Q1V3;D3YZY5;F6ZQJ5	O35435;E9Q1V3	Dihydroorotate dehydrogenase (quinone), mitochondrial	Dhodh	0.748755	1.12074	2.64036	1.7175		0.376846	0.506602	-1.04829	-0.627717	6.4337e-20	3	2	6	1
O35459;F7B227	O35459;F7B227	Delta(3,5)-Delta(2,4)-dienoyl-CoA isomerase, mitochondrial	Ech1	0.163244	-0.193176	-0.618811	-0.309767		0.0886844	-0.0804845	0.25084	0.137897	2.2683e-62	4	2	8	3
O35465-2;O35465;F6WP10	O35465-2;O35465	Peptidyl-prolyl cis-trans isomerase FKBP8	Fkbp8	0.6726	0.321287	-0.0412659	-0.212721		0.339365	0.149389	0.0206266	0.101247	1.133e-136	1	14	10	7
O35492	O35492	Dual specificity protein kinase CLK3	Clk3	-0.0385193	-0.492637	-0.42385	#VALUE!		-0.0106139	-0.21429	0.173128	#VALUE!	2.5315e-29	2	1	2	0
O35516;G5E8J0;O35516-2	O35516;G5E8J0;O35516-2	Neurogenic locus notch homolog protein 2;Notch 2 extracellular truncation;Notch 2 intracellular domain	Notch2	-0.0262309	1.6787	1.18485	0.633173		-0.00456613	0.755913	-0.468112	-0.218212	2.4393e-13	2	1	7	1
O35551-6;O35551;O35551-5;O35551-3;O35551-2;J3QJV7;O35551-4;Q3U983	O35551-6;O35551;O35551-5;O35551-3;O35551-2;J3QJV7;O35551-4	Rab GTPase-binding effector protein 1	Rabep1	0.941398	#VALUE!	1.92286	1.35571		0.471656	NaN	-0.762289	-0.491085	6.4633e-96	3	0	13	6
O35566	O35566	CD151 antigen	Cd151	4.49683	3.98774	3.75728	#VALUE!	Up	2.22148	1.78764	-1.4935	#VALUE!	6.7695e-11	3	3	8	0
O35593	O35593	26S proteasome non-ATPase regulatory subunit 14	Psmd14	0.426453	0.232151	0.400795	0.434544		0.218223	0.109561	-0.155582	-0.143197	2.7779e-240	40	27	46	23
O35598;E9PYF2;D3Z1E6	O35598;E9PYF2	Disintegrin and metalloproteinase domain-containing protein 10	Adam10	#VALUE!	-0.323952	2.16682	-0.304556		NaN	-0.138918	-0.859535	0.135929	1.114e-11	0	3	3	2
O35621;Q91W01;D6RG76	O35621;Q91W01	Phosphomannomutase 1	Pmm1	0.478402	-1.53426	-1.20965	-1.23081		0.243791	-0.679712	0.486354	0.485736	3.236e-17	1	2	2	5
O35639	O35639	Annexin A3	Anxa3	1.0124	0.459201	0.771006	0.643008		0.506602	0.211012	-0.303152	-0.221926	0	112	118	110	129
O35685	O35685	Nuclear migration protein nudC	Nudc	-1.88202	-1.7059	-1.84083	-2.29759		-0.917897	-0.756404	0.737946	0.888617	0	47	33	53	27
O35704	O35704	Serine palmitoyltransferase 1	Sptlc1	-0.0338866	0.160434	-0.928787	-1.01591		-0.00833397	0.0775164	0.3744	0.404576	1.0925e-60	5	10	7	2
Q8C2Q7;O35737	Q8C2Q7;O35737	Heterogeneous nuclear ribonucleoprotein H;Heterogeneous nuclear ribonucleoprotein H, N-terminally processed	Hnrnph1	1.21142	0.894354	1.1198	0.855163		0.604546	0.405448	-0.442183	-0.302048	0	20	25	18	13
O35841	O35841	Apoptosis inhibitor 5	Api5	-0.676503	-0.631831	-0.881856	-0.856799		-0.3246	-0.276485	0.355693	0.344488	0	38	32	43	34
O35855;D3Z7C8;O88374;D3Z3D7	O35855;D3Z7C8;O88374	Branched-chain-amino-acid aminotransferase, mitochondrial;Branched-chain-amino-acid aminotransferase	Bcat2	2.00436	1.93745	3.53897	3.47116		0.994797	0.871528	-1.40648	-1.29	4.9657e-59	15	8	22	13
O35857;F7C189	O35857	Mitochondrial import inner membrane translocase subunit TIM44	Timm44	-0.480765	0.199062	-0.141897	-0.267875		-0.228267	0.0947765	0.0607391	0.122076	4.4098e-220	12	14	35	13
O35864	O35864	COP9 signalosome complex subunit 5	Cops5	-0.494153	-1.41196	-0.928509	-1.09191		-0.234856	-0.625066	0.374288	0.43328	9.2089e-266	35	10	30	18
O35874;Q5SSP3	O35874;Q5SSP3	Neutral amino acid transporter A	Slc1a4	3.05921	2.9572	3.81987	2.81342	Up	1.51395	1.32717	-1.51845	-1.0416	6.3667e-46	7	5	12	5
O35887;G3V004;G3UWR0;G3UWV3;G3UY49;G3UXA8;G3UXA3	O35887;G3V004;G3UWR0;G3UWV3	Calumenin	Calu	1.68844	1.57811	1.26232	0.920094		0.839315	0.710966	-0.498994	-0.32657	0	88	73	117	72
O35943;E9Q2P9	O35943	Frataxin, mitochondrial;Frataxin intermediate form;Frataxin mature form	Fxn	#VALUE!	1.20154	-0.958262	0.880397		NaN	0.542704	0.386149	-0.311578	1.2381e-15	0	3	1	2
O35955	O35955	Proteasome subunit beta type-10	Psmb10	0.122998	-0.863281	-2.14835	-0.890644		0.0688772	-0.379902	0.860526	0.35727	1.7404e-09	3	5	5	2
O35969-2;O35969	O35969-2;O35969	Guanidinoacetate N-methyltransferase	Gamt	-0.266862	0.121957	-0.506676	-0.314623		-0.122994	0.0603242	0.206143	0.139731	1.5482e-126	8	6	16	4
O35972	O35972	39S ribosomal protein L23, mitochondrial	Mrpl23	0.970635	1.00482	0.873134	1.03738		0.486045	0.454808	-0.343861	-0.370863	2.4525e-98	6	8	10	7
O35988	O35988	Syndecan-4	Sdc4	2.87484	#VALUE!	4.04831	3.37167	Up	1.4232	NaN	-1.60951	-1.25243	3.1746e-09	1	0	7	3
O54692	O54692	Centromere/kinetochore protein zw10 homolog	Zw10	0.0266913	0.0786253	-0.122412	-0.118258		0.0214797	0.0409626	0.0529723	0.0655722	1.6753e-199	22	7	27	16
O54724	O54724	Polymerase I and transcript release factor	Ptrf	1.98592	2.16123	1.67941	1.05848		0.985719	0.971516	-0.665249	-0.378832	0	45	38	54	29
O54734	O54734	Dolichyl-diphosphooligosaccharide--protein glycosyltransferase 48 kDa subunit	Ddost	0.96498	1.38067	0.863638	0.0154685		0.483261	0.622743	-0.340075	0.0150693	0	52	57	60	35
O54774	O54774	AP-3 complex subunit delta-1	Ap3d1	1.08837	0.655619	1.32636	0.929256		0.543991	0.298776	-0.524521	-0.33003	0	53	37	71	51
O54781;Q9Z0G2	O54781	SRSF protein kinase 2;SRSF protein kinase 2 N-terminal;SRSF protein kinase 2 C-terminal	Srpk2	-1.35883	-1.2902	-1.15892	-0.71583		-0.660406	-0.570657	0.466131	0.29125	5.662e-23	3	2	4	2
O54782;F6TMZ3	O54782;F6TMZ3	Epididymis-specific alpha-mannosidase	Man2b2	3.19577	3.36774	6.09978	4.28838	Up	1.58116	1.51061	-2.42725	-1.59863	4.1478e-25	6	3	3	6
O54825	O54825	Bystin	Bysl	1.3206	1.15847	1.72469	1.7139		0.65828	0.523462	-0.683298	-0.626357	1.2051e-66	8	11	12	16
O54833	O54833	Casein kinase II subunit alpha	Csnk2a2	-1.57311	-1.45407	-1.49281	-1.18442		-0.765867	-0.643879	0.599223	0.468218	6.3558e-111	19	14	26	20
O54941	O54941	SWI/SNF-related matrix-associated actin-dependent regulator of chromatin subfamily E member 1	Smarce1	-0.236977	#VALUE!	0.588912	0.746331		-0.108285	NaN	-0.230567	-0.260947	1.091e-06	1	0	1	1
O54946;O54946-2;G3X8S5;Q9QYI5;Q9QYI5-2;F6YRQ2	O54946;O54946-2;G3X8S5	DnaJ homolog subfamily B member 6	Dnajb6	0.439778	0.671851	0.952971	-0.531319		0.224781	0.306029	-0.375684	0.221568	1.2144e-22	6	2	7	2
O54950;Q8BIQ9;Q91WG5-2;D3YUS1;D3YYW4	O54950	5-AMP-activated protein kinase subunit gamma-1	Prkag1	-0.647608	-0.459064	-0.900757	-0.418945		-0.310379	-0.199288	0.363227	0.179129	0	34	27	33	26
O54984	O54984	ATPase Asna1	Asna1	-1.33635	-1.95045	-1.28356	-1.18581		-0.649344	-0.865674	0.515813	0.46874	3.4289e-177	34	13	32	21
O54988-2;O54988	O54988-2;O54988	STE20-like serine/threonine-protein kinase	Slk	-1.88074	-1.9953	-1.28861	-1.3937		-0.91727	-0.885713	0.51783	0.547252	0	66	52	44	50
O54992;O54992-5;O54992-2;D3Z2B0;O54992-3;O54992-4;F7DD22	O54992;O54992-5;O54992-2;D3Z2B0;O54992-3;O54992-4	MAP kinase-activated protein kinase 5	Mapkapk5	1.02085	#VALUE!	1.20846	1.87542		0.510759	NaN	-0.477522	-0.687358	4.4514e-08	2	0	2	1
O54998	O54998	Peptidyl-prolyl cis-trans isomerase FKBP7	Fkbp7	3.53626	3.36035	3.0666	2.99358	Up	1.74872	1.50731	-1.2182	-1.10964	2.5184e-61	19	24	40	32
O55013	O55013	Trafficking protein particle complex subunit 3	Trappc3	0.576032	0.513965	0.294841	0.764226		0.291839	0.235482	-0.113348	-0.267705	4.4705e-82	17	12	25	13
O55022	O55022	Membrane-associated progesterone receptor component 1	Pgrmc1	0.879444	1.06318	1.22553	1.34826		0.441165	0.480885	-0.484328	-0.488269	0	50	59	59	57
O55029	O55029	Coatomer subunit beta	Copb2	1.01199	1.10776	1.43341	1.35888		0.506399	0.500802	-0.56719	-0.492281	0	128	77	131	102
O55057	O55057	Retinal rod rhodopsin-sensitive cGMP 3,5-cyclic phosphodiesterase subunit delta	Pde6d	#VALUE!	-0.100198	-0.0689893	-0.0834215		NaN	-0.0389398	0.0316775	0.0524159	8.579e-35	0	3	6	2
O55060;D3Z380;D3YWK6;D3Z217;D6RIK3	O55060;D3Z380;D3YWK6;D3Z217	Thiopurine S-methyltransferase	Tpmt	-2.60212	-2.34104	-2.48647	-2.50481		-1.2723	-1.0402	0.995304	0.966873	1.3465e-18	5	4	5	6
O55091	O55091	Protein IMPACT	Impact	-0.494015	0.171431	-0.124156	-0.140098		-0.234788	0.0824301	0.0536674	0.0738202	9.3921e-215	13	4	18	9
O55106;F8WH41;F6Z700	O55106;F8WH41	Striatin	Strn	#VALUE!	0.0391547	0.254621	0.0701831		NaN	0.0233263	-0.0973167	-0.00559406	3.2467e-59	0	4	9	9
O55125;Q5SVG6	O55125	Protein NipSnap homolog 1	Nipsnap1	4.57939	4.95208	6.91389	3.19517	Up	2.2621	2.21853	-2.75176	-1.18577	5.027e-24	5	2	9	2
O55135;A6PWZ2;B1AZQ4;D6RJJ3;D6RG53	O55135	Eukaryotic translation initiation factor 6	Eif6	-1.04568	-1.16426	-0.896816	-0.713331		-0.506291	-0.514388	0.361656	0.290306	0	28	21	31	28
O55142	O55142	60S ribosomal protein L35a	Rpl35a	-0.100505	-0.0387564	-0.0640288	-0.108023		-0.0411202	-0.0114861	0.0297002	0.061707	2.9978e-75	16	28	16	31
O55143;J3KMM5;O55143-2;Q8R429	O55143;J3KMM5;O55143-2	Sarcoplasmic/endoplasmic reticulum calcium ATPase 2	Atp2a2	1.34243	1.24447	0.722567	0.578288		0.669027	0.561888	-0.283843	-0.197484	0	144	73	162	102
O55201;O55201-2	O55201;O55201-2	Transcription elongation factor SPT5	Supt5h	-1.01824	-0.559399	-0.942721	-1.08936		-0.492789	-0.244121	0.379954	0.432318	0	33	33	42	37
O55222;F6Q5Z1;D3YZA5	O55222	Integrin-linked protein kinase	Ilk	0.763842	0.78527	1.02827	1.15277		0.384271	0.356707	-0.4057	-0.414441	2.7002e-101	21	39	36	23
O55234	O55234	Proteasome subunit beta type-5	Psmb5	0.430482	0.522456	0.20284	0.311298		0.220206	0.239276	-0.0766758	-0.0966532	0	57	30	61	64
O55236;Q9DCC1	O55236;Q9DCC1	mRNA-capping enzyme;Polynucleotide 5-triphosphatase;mRNA guanylyltransferase	Rngtt	-1.02213	#VALUE!	-1.24999	0.882248		-0.494698	NaN	0.502432	-0.312276	5.3574e-15	6	0	2	1
O55239;D3YX59	O55239;D3YX59	Nicotinamide N-methyltransferase	Nnmt	-0.393382	-0.693345	0.223318	0.338889		-0.185261	-0.303971	-0.0848387	-0.107073	2.1849e-201	9	19	21	15
O55242;O55242-2	O55242;O55242-2	Sigma non-opioid intracellular receptor 1	Sigmar1	1.50419	1.49013	0.524433	0.689311		0.748633	0.671656	-0.204865	-0.239413	2.423e-53	7	7	9	12
O70152;A2BDX2;F8WII3	O70152;A2BDX2	Dolichol-phosphate mannosyltransferase	Dpm1	1.76461	1.74663	1.75727	1.4558		0.876802	0.786262	-0.696284	-0.528885	3.7326e-176	23	25	31	27
O70194	O70194	Eukaryotic translation initiation factor 3 subunit D	Eif3d	-0.296863	-0.209365	-0.0416228	-0.129194		-0.137759	-0.087718	0.0207689	0.0697022	0	65	34	65	52
O70251;G3UX43;G3UZ47	O70251	Elongation factor 1-beta	Eef1b	-0.16309	-0.273404	0.0183795	0.0538429		-0.0719216	-0.116332	-0.00314849	0.000576859	0	32	42	50	55
O70252;D3YX62;D3YXN4;D3Z4A2	O70252;D3YX62	Heme oxygenase 2	Hmox2	0.359161	0.727775	0.272516	-0.0172803		0.185105	0.331017	-0.104449	0.0274372	5.5904e-217	31	13	28	17
O70274	O70274	Protein tyrosine phosphatase type IVA 2	Ptp4a2	1.62049	1.79236	1.99322	2.05155		0.80587	0.806695	-0.790335	-0.753872	8.1635e-53	9	13	22	11
Q6PE70;O70309;G5E8F8;O70309-2	Q6PE70;O70309;G5E8F8;O70309-2	Integrin beta;Integrin beta-5	Itgb5	1.48546	2.00279	1.26585	0.650366		0.739416	0.900722	-0.500401	-0.224705	8.6968e-83	8	6	18	11
O70310	O70310	Glycylpeptide N-tetradecanoyltransferase 1	Nmt1	0.0266913	0.084896	0.424781	0.433109		0.0214797	0.0437644	-0.165143	-0.142656	0	44	22	48	30
O70318	O70318	Band 4.1-like protein 2	Epb41l2	2.27185	2.53477	2.36551	1.70636		1.12644	1.13842	-0.938735	-0.62351	0	147	131	145	112
Q76LV0;O70325;O70325-2;Q91XR9	Q76LV0;O70325;O70325-2;Q91XR9	Glutathione peroxidase;Phospholipid hydroperoxide glutathione peroxidase, mitochondrial;Phospholipid hydroperoxide glutathione peroxidase, nuclear	Gpx4	1.94342	1.73969	1.5544	1.61506		0.964805	0.783163	-0.61542	-0.589029	6.3644e-43	12	16	26	11
O70378	O70378	Neighbor of COX4	Cox4nb	1.74764	1.84363	1.11307	1.21286		0.86845	0.829606	-0.4395	-0.437135	3.381e-125	21	16	28	18
O70400	O70400	PDZ and LIM domain protein 1	Pdlim1	-2.42992	-3.47765	-3.96445	-3.64732	Down	-1.18754	-1.54806	1.58443	1.39835	0	58	24	71	42
O70401;Q99L96;H3BL26;H3BJJ0	O70401;Q99L96;H3BL26	Tetraspanin-6	Tspan6	2.32903	1.83326	1.76843	2.33751		1.15458	0.824971	-0.700732	-0.861867	4.42e-23	6	1	16	2
O70433	O70433	Four and a half LIM domains protein 2	Fhl2	1.5786	1.73368	1.25124	1.18503		0.785258	0.780478	-0.494576	-0.426625	0	45	38	76	38
O70435;E0CYL6;F8WH02;E0CZ34;F7BWF9	O70435	Proteasome subunit alpha type-3	Psma3	0.149428	0.0833296	-0.281781	-0.319821		0.081885	0.0430645	0.116498	0.141694	0	38	52	73	37
O70439;Q8BH40	O70439;Q8BH40	Syntaxin-7	Stx7	1.63804	2.07293	1.77349	1.14473		0.814509	0.932061	-0.70275	-0.411407	3.2749e-256	11	12	14	10
O70475;D3Z3F7;D3YXP9;F6ZQT4	O70475;D3Z3F7	UDP-glucose 6-dehydrogenase	Ugdh	1.57128	1.50348	0.36573	0.321195		0.781653	0.677621	-0.141605	-0.100391	0	77	139	114	91
O70481	O70481	E3 ubiquitin-protein ligase UBR1	Ubr1	-0.406209	-0.307498	0.18692	0.146645		-0.191574	-0.131566	-0.0703301	-0.0344705	7.9374e-48	9	4	15	7
O70503;O70503-2	O70503;O70503-2	Estradiol 17-beta-dehydrogenase 12	Hsd17b12	1.57656	1.58698	1.03614	1.09025		0.784253	0.714927	-0.408838	-0.390831	0	64	54	83	77
O70551;F8WGJ7	O70551	SRSF protein kinase 1	Srpk1	-0.995359	-1.30572	-0.813616	-1.03088		-0.481525	-0.577595	0.328492	0.410233	2.5292e-262	17	10	13	11
O70572;D6RGM4	O70572	Sphingomyelin phosphodiesterase 2	Smpd2	0.699354	0.61627	1.57939	#VALUE!		0.352533	0.281194	-0.625378	#VALUE!	2.5967e-20	4	1	7	0
O70579	O70579	Peroxisomal membrane protein PMP34	Slc25a17	1.41149	1.34227	1.93941	1.81258		0.703012	0.605589	-0.768887	-0.663625	1.0223e-29	12	8	15	6
O70589-3;O70589;O70589-5;O70589-4;O70589-2;F6ZQR2;F6Y9I5;F7CD87;B1AUH6	O70589-3;O70589;O70589-5;O70589-4;O70589-2	Peripheral plasma membrane protein CASK	Cask	1.85608	1.87383	1.95282	1.69432		0.921817	0.843099	-0.774232	-0.61896	1.1744e-28	6	2	9	6
O70591;F8WJ30	O70591;F8WJ30	Prefoldin subunit 2	Pfdn2	-0.835819	-0.766473	-0.821102	-0.736068		-0.403008	-0.336646	0.331476	0.298893	5.2964e-262	19	11	23	15
O88207;A3KGE7;Q64739;Q64739-3;Q64739-4;Q64739-6;Q64739-5;Q64739-1;Q64739-7;Q3UUU1	O88207	Collagen alpha-1(V) chain	Col5a1	3.48024	3.5031	0.689015	0.793866		1.72115	1.57109	-0.270469	-0.278899	0	33	43	71	71
O88271	O88271	Craniofacial development protein 1	Cfdp1	-1.19994	-2.44565	-2.27815	-1.62128		-0.58221	-1.08694	0.912267	0.633199	3.5689e-57	10	6	11	5
O88325	O88325		Naglu	1.67547	1.47388	3.85793	3.83808		0.83293	0.664392	-1.53362	-1.42857	1.1118e-168	3	6	17	17
O88342	O88342	WD repeat-containing protein 1	Wdr1	0.51139	0.568085	0.504671	0.535339		0.260026	0.259664	-0.196988	-0.181264	0	82	75	118	79
O88343;O88343-2;A7E1Z5;E9Q8N8;D3Z7G8	O88343;O88343-2;A7E1Z5;E9Q8N8	Electrogenic sodium bicarbonate cotransporter 1	Slc4a4	6.23924	4.64283	7.71746	7.51169	Up	3.079	2.08035	-3.07206	-2.81594	1.7786e-121	4	4	2	1
O88351;Q5D0E0;F6ULQ4;F6XPL0	O88351;Q5D0E0	Inhibitor of nuclear factor kappa-B kinase subunit beta	Ikbkb	-0.520732	-0.0139543	0.012255	0.384626		-0.247936	-0.000404044	-0.000707191	-0.124346	2.692e-65	4	5	4	6
O88393	O88393	Transforming growth factor beta receptor type 3	Tgfbr3	3.7889	3.45372	4.2106	3.0311	Up	1.87307	1.54903	-1.6742	-1.12381	1.2751e-18	9	6	12	10
O88396	O88396	GrpE protein homolog 2, mitochondrial	Grpel2	#VALUE!	-0.322319	-0.572894	-0.198449		NaN	-0.138188	0.232538	0.0958569	1.0217e-09	0	2	4	2
O88398;D3YXP4;D3Z3N6	O88398	Advillin	Avil	7.19884	5.02379	7.85203	8.50063	Up	3.55127	2.25057	-3.1257	-3.18942	7.0684e-180	7	3	23	11
O88413	O88413	Tubby-related protein 3	Tulp3	0.615514	1.09404	0.148553	#VALUE!		0.311271	0.494672	-0.0550366	#VALUE!	5.0386e-36	2	2	4	0
O88428	O88428	Bifunctional 3-phosphoadenosine 5-phosphosulfate synthase 2;Sulfate adenylyltransferase;Adenylyl-sulfate kinase	Papss2	5.81911	5.94561	7.10844	6.36412	Up	2.87224	2.66246	-2.82931	-2.38255	1.4989e-240	17	8	23	11
O88441	O88441	Metaxin-2	Mtx2	-0.374048	-0.229156	-1.03309	-1.21468		-0.175745	-0.0965606	0.415975	0.479644	8.8009e-72	7	7	15	7
O88455;D3YXR4;D3Z7G1	O88455	7-dehydrocholesterol reductase	Dhcr7	1.03604	1.26475	-1.19852	-0.224099		0.518233	0.570949	0.481919	0.105544	6.3027e-26	5	5	6	7
Q3TPJ8;O88487;A2BFF9;A2BFF8;A2BFF5;D3Z258	Q3TPJ8;O88487;A2BFF9;A2BFF8;A2BFF5	Cytoplasmic dynein 1 intermediate chain 2	Dync1i2	0	-0.228603	-0.0608365	0.0332777		0.00834347	-0.0963139	0.0284277	0.00834348	0	42	30	44	39
O88520	O88520	Leucine-rich repeat protein SHOC-2	Shoc2	0.0139562	-0.334458	-0.0244574	#VALUE!		0.015212	-0.143612	0.0139267	#VALUE!	9.4046e-18	3	1	7	0
O88531;B1B0P9;B1B0P8	O88531	Palmitoyl-protein thioesterase 1	Ppt1	0.6233	-0.150006	1.2998	0.860538		0.315102	-0.0611948	-0.513934	-0.304077	2.0538e-30	3	2	4	1
O88532;F6QJP7;D3Z5G4;D3Z7V6;F6V459;F6RTK9	O88532	Zinc finger RNA-binding protein	Zfr	0.190681	-0.281745	-0.518891	-0.772842		0.102188	-0.120059	0.211012	0.312781	7.1863e-258	7	8	16	7
O88543;F6YCA7;D3Z036	O88543	COP9 signalosome complex subunit 3	Cops3	-1.85583	-1.61613	-1.6327	-2.08417		-0.905007	-0.716292	0.654985	0.808014	0	22	8	23	9
O88544;F6QTS1;D3YV99;D3Z1R9;D6RG47	O88544;F6QTS1;D3YV99;D3Z1R9	COP9 signalosome complex subunit 4	Cops4	-1.18514	-1.27708	-1.16938	-1.82299		-0.574927	-0.564798	0.470303	0.709379	0	39	24	47	30
O88569;O88569-2;O88569-3	O88569;O88569-2;O88569-3	Heterogeneous nuclear ribonucleoproteins A2/B1	Hnrnpa2b1	0.854291	0.415955	0.600352	0.607838		0.428786	0.191689	-0.235127	-0.208644	0	111	57	113	62
O88572;E9Q8K0	O88572;E9Q8K0	Low-density lipoprotein receptor-related protein 6	Lrp6	0.0359189	#VALUE!	2.47368	5.89372		0.026021	NaN	-0.98185	-2.2049	1.1315e-73	2	0	2	1
O88587;O88587-2;D3Z227	O88587;O88587-2	Catechol O-methyltransferase	Comt	1.15418	0.902388	0.344592	0.448152		0.576377	0.409038	-0.133179	-0.148337	3.0984e-181	26	30	71	36
O88597;E9PYD6;F7CVL9	O88597;E9PYD6	Beclin-1	Becn1	#VALUE!	-0.455653	1.58984	0.720236		NaN	-0.197765	-0.629546	-0.251092	1.2193e-33	0	3	2	2
O88630	O88630	Golgi SNAP receptor complex member 1	Gosr1	2.16256	1.92596	2.60223	2.34063		1.07265	0.866394	-1.0331	-0.863047	1.2045e-44	14	19	20	12
O88668;J3QP41;K4DI63	O88668;J3QP41;K4DI63	Protein CREG1	Creg1	1.3428	1.01212	1.71952	1.45388		0.669208	0.458067	-0.681238	-0.528157	2.2118e-08	3	5	6	5
O88685;B7ZCF1;A2AGN7;F6Q2E3	O88685;B7ZCF1;A2AGN7	26S protease regulatory subunit 6A	Psmc3	-0.557091	-0.181862	-0.0498191	-0.209514		-0.26583	-0.0754288	0.024036	0.100036	0	79	78	78	64
O88696	O88696	Putative ATP-dependent Clp protease proteolytic subunit, mitochondrial	Clpp	2.29845	2.12796	2.7232	2.74762		1.13953	0.956651	-1.08131	-1.01675	0	28	15	31	17
O88712;O88712-2;E9Q0T4	O88712;O88712-2	C-terminal-binding protein 1	Ctbp1	0.0642831	-0.0130501	0.2362	0.0366978		0.0399806	0	-0.0899735	0.0070519	5.6893e-142	19	17	20	18
O88736;Q8C5N9	O88736;Q8C5N9	3-keto-steroid reductase	Hsd17b7	2.3971	2.48972	0.50496	0.614424		1.18808	1.11829	-0.197104	-0.21113	2.9336e-164	15	8	17	4
Q3UDC3;O88746;O88746-2	Q3UDC3;O88746	Target of Myb protein 1	Tom1	0.317613	-0.234615	0.346496	-0.342953		0.164658	-0.0989999	-0.133939	0.15043	1.2977e-183	6	6	10	7
O88792	O88792	Junctional adhesion molecule A	F11r	-1.03396	-2.4063	-4.19279	-4.34719		-0.500524	-1.06936	1.67545	1.66266	9.6601e-51	3	2	6	3
O88796	O88796	Ribonuclease P protein subunit p30	Rpp30	0.0422458	-0.0417846	0.357356	0.230584		0.0291349	-0.0128392	-0.138267	-0.0661707	3.2764e-139	14	16	22	15
O88811;O88811-2;B0R0N7	O88811;O88811-2	Signal transducing adapter molecule 2	Stam2	-1.18982	-1.92426	-0.788163	-1.31793		-0.577229	-0.85397	0.318346	0.518636	6.3989e-62	5	5	12	7
O88844;D3YVY3	O88844	Isocitrate dehydrogenase [NADP] cytoplasmic	Idh1	1.2986	0.813888	0.643161	0.0928764		0.647453	0.369494	-0.252192	-0.0141644	0	48	52	52	56
O88848;D3Z067;O88848-2	O88848;D3Z067;O88848-2	ADP-ribosylation factor-like protein 6	Arl6	-0.524146	-1.15717	-1.4746	-1.64387		-0.249616	-0.511218	0.591967	0.641731	1.4976e-114	8	6	8	6
O88851	O88851	Putative hydrolase RBBP9	Rbbp9	-1.2658	-1.36152	-0.368538	-0.822646		-0.614624	-0.602526	0.151079	0.331591	2.0819e-21	10	6	12	9
Q3U3M5;O88874	Q3U3M5;O88874	Cyclin-K	Ccnk	-0.619031	-0.759996	-0.680335	-1.24388		-0.296315	-0.333752	0.275365	0.490673	0	8	10	14	4
O88879;G3XA09;O88879-2;Q80VR5	O88879;G3XA09;O88879-2	Apoptotic protease-activating factor 1	Apaf1	#VALUE!	0.000482414	1.43158	1.34392		NaN	0.0060466	-0.566464	-0.486631	9.8973e-22	0	5	5	7
O88952	O88952	Protein lin-7 homolog C	Lin7c	1.1124	1.09358	1.1466	0.971943		0.555816	0.494467	-0.452866	-0.346151	5.276e-53	10	9	15	12
O88958;D3Z0R5	O88958	Glucosamine-6-phosphate isomerase 1	Gnpda1	-2.48776	-1.93888	-1.2418	-0.7839		-1.21602	-0.860504	0.49917	0.316957	6.7072e-114	13	8	16	13
O88967	O88967	ATP-dependent zinc metalloprotease YME1L1	Yme1l1	0.482362	-0.0477515	-1.74272	-1.69132		0.245739	-0.0155054	0.698841	0.659651	0	3	4	14	3
O88983;Q9D0J1;Q8BS59	O88983	Syntaxin-8	Stx8	1.08958	0.650102	1.01492	1.21798		0.544584	0.296311	-0.400378	-0.43907	3.644e-88	10	10	14	10
O88986;E9PWY6	O88986;E9PWY6	2-amino-3-ketobutyrate coenzyme A ligase, mitochondrial	Gcat	0.426957	0.430059	1.09119	1.07965		0.218471	0.197991	-0.430781	-0.386827	0	36	17	38	21
O89001	O89001	Carboxypeptidase D	Cpd	2.8864	2.69459	3.89541	3.27508	Up	1.42889	1.20983	-1.54856	-1.21595	1.1448e-44	11	6	9	15
O89017	O89017	Legumain	Lgmn	-1.88229	-2.32997	-3.86061	-3.98856		-0.918033	-1.03525	1.54305	1.52722	1.101e-169	21	13	18	12
O89023	O89023	Tripeptidyl-peptidase 1	Tpp1	-1.63588	-0.493013	4.12363	0.498782		-0.796761	-0.214458	-1.63953	-0.167458	2.3226e-226	7	20	21	19
O89051	O89051	Integral membrane protein 2B;BRI2, membrane form;BRI2 intracellular domain;BRI2C, soluble form;Bri23 peptide	Itm2b	3.68629	3.23153	3.66342	3.56354	Up	1.82257	1.44975	-1.45609	-1.32489	1.0962e-38	3	3	11	15
O89079;D3Z315;F6YFR7;F6XIG5;E9Q6I5	O89079;D3Z315;F6YFR7	Coatomer subunit epsilon	Cope	0.720628	0.825864	1.20382	1.29298		0.363003	0.374845	-0.475676	-0.467394	0	45	42	74	39
O89086;Q8BG13	O89086;Q8BG13	Putative RNA-binding protein 3	Rbm3	0.491741	0.428934	0.456205	0.537116		0.250355	0.197488	-0.17767	-0.181935	0	31	50	56	48
O89110	O89110	Caspase-8;Caspase-8 subunit p18;Caspase-8 subunit p10	Casp8	1.26775	-0.607714	-0.956047	-0.541461		0.632268	-0.265709	0.385265	0.225398	1.0763e-16	1	3	4	1
O89112;B2KGR2	O89112;B2KGR2	LanC-like protein 1	Lancl1	-0.870207	-0.243446	-0.457081	-0.0571763		-0.419932	-0.102946	0.186374	0.0425042	2.4599e-45	6	1	13	7
O89116	O89116	Vesicle transport through interaction with t-SNAREs homolog 1A	Vti1a	0.413319	#VALUE!	0.823591	0.50153		0.21176	NaN	-0.324112	-0.168496	4.3822e-93	2	0	8	2
P00375	P00375	Dihydrofolate reductase	Dhfr	-1.98729	-1.98785	-1.63132	-1.65316		-0.969706	-0.882385	0.654436	0.645241	0	25	12	29	25
P00405;Q7JCZ1	P00405;Q7JCZ1	Cytochrome c oxidase subunit 2	Mtco2;mt-Co2	0.119922	0.555114	-0.244532	-0.208088		0.0673633	0.253868	0.10165	0.0994973	9.2715e-115	25	12	27	19
P00493	P00493	Hypoxanthine-guanine phosphoribosyltransferase	Hprt1	-1.45883	-1.60073	-1.63523	-1.43943		-0.709623	-0.70941	0.655993	0.564524	0	26	35	46	31
P01831	P01831	Thy-1 membrane glycoprotein	Thy1	-0.37428	-0.360851	0.512687	0.592465		-0.175859	-0.155405	-0.200183	-0.202838	3.612e-273	25	21	24	21
P01897	P01897	H-2 class I histocompatibility antigen, L-D alpha chain	H2-L	0.158278	0.677592	-0.713082	-0.598221		0.0862402	0.308594	0.288418	0.246834	1.9265e-42	2	4	4	2
P01899;P01896;G3UZP7;G3UX20	P01899	H-2 class I histocompatibility antigen, D-B alpha chain	H2-D1	1.40734	1.3165	-0.0223059	0.0778991		0.700972	0.594071	0.0130691	-0.00850813	4.6452e-131	9	12	17	10
P02301;P84244;E0CZ27	P02301;P84244;E0CZ27	Histone H3.3C;Histone H3.3;Histone H3	H3f3c;H3f3a	1.12474	2.1168	0.020738	-0.138646		0.561888	0.951662	-0.00408859	0.0732718	3.4643e-96	4	7	6	8
P02463	P02463	Collagen alpha-1(IV) chain;Arresten	Col4a1	0.846442	2.66795	-0.979248	3.12312		0.424922	1.19793	0.394514	-1.15856	3.6313e-33	9	2	6	6
P03958	P03958	Adenosine deaminase	Ada	0.398348	0.354018	1.94725	2.12064		0.204391	0.164014	-0.772012	-0.779967	9.977e-46	14	7	19	3
P03991;P14428;P04223;P04223-2	P03991;P14428;P04223;P04223-2	H-2 class I histocompatibility antigen, K-W28 alpha chain;H-2 class I histocompatibility antigen, K-Q alpha chain;H-2 class I histocompatibility antigen, K-K alpha chain	H2-K1	1.6945	1.16543	0.440357	0.31326		0.842295	0.52657	-0.171352	-0.0973939	8.4081e-157	13	13	20	15
P04184	P04184	Thymidine kinase, cytosolic	Tk1	1.82684	1.20442	0.483161	1.99286		0.907429	0.543991	-0.188414	-0.731709	1.1191e-109	4	10	28	17
P04925	P04925	Major prion protein	Prnp	#VALUE!	1.28641	3.59087	2.21662		NaN	0.580628	-1.42717	-0.816215	1.8097e-19	0	1	3	1
A6ZI44;P05064;D3YWI1;A6ZI46;Q9CPQ9;D3YV98;D3Z510;P05063;Q91Y97	A6ZI44;P05064;D3YWI1;A6ZI46;Q9CPQ9;D3YV98	Fructose-bisphosphate aldolase;Fructose-bisphosphate aldolase A	Aldoa;Aldoart1	-2.98466	-2.80244	-2.64628	-2.56704	Down	-1.46057	-1.24636	1.05901	0.990374	0	117	125	123	137
P05132;P05132-2	P05132;P05132-2	cAMP-dependent protein kinase catalytic subunit alpha	Prkaca	-0.404537	-0.157628	-0.15506	0.248583		-0.19075	-0.0646006	0.0659859	-0.0729683	0	21	21	33	23
P05201;F7ALS6	P05201	Aspartate aminotransferase, cytoplasmic	Got1	-3.31011	-3.40252	-2.57506	-3.15391	Down	-1.62073	-1.51449	1.03062	1.21201	0	65	71	75	51
P05202	P05202	Aspartate aminotransferase, mitochondrial	Got2	0.441281	0.703815	1.41069	1.09541		0.225522	0.320311	-0.558134	-0.392781	0	92	103	123	74
P05480;Q80XU2	P05480;Q80XU2	Neuronal proto-oncogene tyrosine-protein kinase Src	Src	0.72905	1.74456	1.89662	0.944558		0.367147	0.785341	-0.751829	-0.335808	6.6551e-85	7	4	4	9
G5E8N5;P06151;D3YZQ9;D3Z736;P00342;D3YZE4;D3YVR7	G5E8N5;P06151;D3YZQ9;D3Z736	L-lactate dehydrogenase;L-lactate dehydrogenase A chain	Ldha	-2.95065	-3.15233	-3.60434	-3.60403	Down	-1.44383	-1.4027	1.4409	1.382	0	198	241	309	242
P06745;CON__Q3ZBD7	P06745	Glucose-6-phosphate isomerase	Gpi	-2.56363	-2.65291	-2.5278	-2.54776	Down	-1.25336	-1.17955	1.01178	0.983094	0	127	75	101	89
P06795	P06795	Multidrug resistance protein 1B	Abcb1b	2.47092	2.38173	1.16095	1.21881		1.22441	1.07005	-0.458584	-0.439383	1.2934e-43	2	5	8	5
P06797;Q9JI81	P06797	Cathepsin L1;Cathepsin L1 heavy chain;Cathepsin L1 light chain	Ctsl1	1.62969	-0.50871	-0.399693	-0.635064		0.810402	-0.221472	0.163499	0.260748	6.9299e-163	15	8	19	11
P06801	P06801	NADP-dependent malic enzyme	Me1	0.39147	0.287045	-0.567036	-0.583705		0.201006	0.134089	0.230203	0.241352	0	60	35	89	72
P07091;D3YUT9	P07091;D3YUT9	Protein S100-A4	S100a4	1.01529	3.15121	-1.38637	1.20604		0.508023	1.41386	0.556797	-0.434559	0	4	80	9	99
P07214;Q5NCU4;Q5NCU3	P07214;Q5NCU4	SPARC	Sparc	1.4068	1.94996	-0.850324	-0.267173		0.700706	0.877116	0.343123	0.121811	0	14	11	25	15
P07356;B0V2N5;B0V2N7;B0V2N8;REV__Q8BND4;REV__F6WNG1	P07356;B0V2N5;B0V2N7;B0V2N8	Annexin A2;Annexin	Anxa2	-0.710844	-1.2109	0.320774	0.488201		-0.341501	-0.535227	-0.123685	-0.163462	0	185	138	141	80
P07607;D6RCW9	P07607;D6RCW9	Thymidylate synthase	Tyms	-1.7171	-1.70056	-1.29291	-1.49559		-0.836733	-0.754018	0.519542	0.585732	2.3402e-230	18	15	21	9
P07742	P07742	Ribonucleoside-diphosphate reductase large subunit	Rrm1	-1.87047	-1.88932	-2.24434	-2.07478		-0.912211	-0.838357	0.898789	0.804467	0	64	43	89	77
P07901;B7ZC50;B7ZC49;A2A6A2	P07901	Heat shock protein HSP 90-alpha	Hsp90aa1	-2.37383	-2.42472	-2.62155	-2.58699		-1.15994	-1.07759	1.04914	0.997907	0	180	205	264	247
P08003	P08003	Protein disulfide-isomerase A4	Pdia4	0.796452	0.707434	0.671507	0.641983		0.400319	0.321928	-0.26349	-0.221539	0	160	114	192	148
P08113;F7C312	P08113;F7C312	Endoplasmin	Hsp90b1	2.24583	2.45474	1.91556	2.03253		1.11363	1.10266	-0.75938	-0.746688	0	349	366	341	423
P08121	P08121	Collagen alpha-1(III) chain	Col3a1	4.66337	4.23484	2.69337	2.15981	Up	2.30343	1.89805	-1.06942	-0.794758	0	84	49	134	115
P08122;D3YV27	P08122	Collagen alpha-2(IV) chain;Canstatin	Col4a2	-3.68648	-2.37079	-1.60269	-3.87176		-1.80596	-1.05349	0.643025	1.48311	2.0064e-09	2	5	2	1
P08228	P08228	Superoxide dismutase [Cu-Zn]	Sod1	-0.0272013	-0.0517685	-0.455809	-0.463891		-0.00504377	-0.0173002	0.185867	0.196103	1.7267e-134	20	32	31	35
P08249	P08249	Malate dehydrogenase, mitochondrial	Mdh2	1.08576	0.937217	1.16592	0.964036		0.542704	0.4246	-0.460568	-0.343165	0	110	108	114	101
P08556;Q9D091	P08556;Q9D091	GTPase NRas	Nras	1.20505	1.06249	1.01277	0.665441		0.601411	0.480575	-0.399521	-0.230398	4.1872e-150	16	11	18	20
P08752;Q3V3I2;P20612;F6QPU5	P08752	Guanine nucleotide-binding protein G(i) subunit alpha-2	Gnai2	1.57792	1.27906	1.8782	2.21716		0.784923	0.577344	-0.744487	-0.816418	0	58	45	72	37
P08775	P08775	DNA-directed RNA polymerase II subunit RPB1	Polr2a	-1.38362	-1.62006	-1.03878	-1.413		-0.672612	-0.718047	0.418244	0.55454	8.5944e-143	21	16	15	22
P09055	P09055	Integrin beta-1	Itgb1	1.70136	1.77626	1.67654	1.66154		0.845671	0.799502	-0.664105	-0.606584	0	98	79	129	101
P09103;E9Q8G8	P09103	Protein disulfide-isomerase	P4hb	2.85564	2.88115	2.32282	2.44559		1.41376	1.29319	-0.921718	-0.902686	0	200	238	223	246
P09405	P09405	Nucleolin	Ncl	-0.68356	-0.665641	-0.867687	-0.835375		-0.328073	-0.291592	0.350045	0.336398	0	174	108	200	171
P09411;P09041	P09411	Phosphoglycerate kinase 1	Pgk1	-2.27104	-2.6631	-2.99512	-3.2303	Down	-1.10936	-1.1841	1.19805	1.24086	0	169	169	159	163
P09528	P09528	Ferritin heavy chain	Fth1	0.611968	-0.646806	0.696138	2.54573		0.309525	-0.283176	-0.273308	-0.940506	4.3856e-109	32	34	54	31
P09542;P05977;E9PWG4;P05977-2	P09542;P05977;E9PWG4;P05977-2	Myosin light chain 3;Myosin light chain 1/3, skeletal muscle isoform	Myl3;Myl1	1.83324	2.08256	1.72841	1.92814		0.910579	0.936365	-0.684782	-0.707265	3.4089e-36	12	6	12	7
P09671	P09671	Superoxide dismutase [Mn], mitochondrial	Sod2	2.77613	2.94339	2.36669	2.50599	Up	1.37462	1.321	-0.939205	-0.925495	0	29	30	34	32
P09926	P09926	Surfeit locus protein 2	Surf2	-1.27758	-2.7224	-2.27546	-2.5605		-0.620423	-1.2106	0.911193	0.987903	3.0031e-13	2	2	5	4
P0C0A3;B1AZ42;B1AZ41	P0C0A3	Charged multivesicular body protein 6	Chmp6	2.07328	1.38821	1.81818	3.18492		1.02871	0.626112	-0.720564	-1.1819	9.0657e-45	7	2	12	2
P0C0S6;Q3THW5;Q5NC91;Q3UA95;G3UWL7	P0C0S6;Q3THW5;Q5NC91;Q3UA95	Histone H2A.Z;Histone H2A.V;Histone H2A	H2afz;H2afv	1.31316	1.6321	0.656808	0.630864		0.654619	0.735089	-0.257632	-0.21734	9.7428e-160	3	7	13	13
P10107	P10107	Annexin A1	Anxa1	-8.81208	-9.10058	-14.2527	-10.1412	Down	-4.32855	-4.06051	5.68541	3.8508	0	113	56	99	64
P10126;D3YZ68;D3Z3I8	P10126;D3YZ68;D3Z3I8	Elongation factor 1-alpha 1	Eef1a1	-0.198428	-0.218333	0.208149	0.137149		-0.0893134	-0.0917251	-0.0787922	-0.0308845	0	570	887	575	600
P10404;B2RQY6	P10404	MLV-related proviral Env polyprotein;Surface protein;Transmembrane protein		12.5805	8.26168	11.6308	11.2194	Up	6.19985	3.69733	-4.63197	-4.2162	1.1416e-98	7	16	13	16
P10493	P10493	Nidogen-1	Nid1	0.398602	0.165326	0.0107703	-0.438129		0.204516	0.0797024	-0.000115396	0.186374	1.9936e-57	13	10	21	8
P10518	P10518	Delta-aminolevulinic acid dehydratase	Alad	-1.8687	-1.8686	-1.48922	-1.38506		-0.911343	-0.829101	0.597793	0.543991	0	28	24	28	20
P10605	P10605	Cathepsin B;Cathepsin B light chain;Cathepsin B heavy chain	Ctsb	-0.619498	-0.811433	-0.93604	-0.860405		-0.296545	-0.356735	0.37729	0.345851	0	91	68	120	70
P10630;P10630-2;Q8BTU6;D6RJ60;D6RJ11	P10630;P10630-2;Q8BTU6	Eukaryotic initiation factor 4A-II	Eif4a2	2.96111	-0.50506	1.98728	-0.884975		1.46566	-0.219841	-0.787966	0.355129	0	9	17	23	11
P10639	P10639	Thioredoxin	Txn	0.0439688	-1.23839	-0.152293	-1.69373		0.0299829	-0.54751	0.0648829	0.660564	0	7	31	9	34
P10649;A2AE89;F6WHQ7;J3QQ61	P10649;A2AE89;F6WHQ7	Glutathione S-transferase Mu 1	Gstm1	0.977117	1.03273	1.37648	1.37892		0.489235	0.46728	-0.544498	-0.499851	0	62	52	85	71
P10711;P10711-2;F6XMY4;B7ZCS4	P10711;P10711-2	Transcription elongation factor A protein 1	Tcea1	-1.49122	-2.57281	-1.71137	-1.57668		-0.725565	-1.14376	0.686344	0.616358	0	30	17	40	21
P10833	P10833	Ras-related protein R-Ras	Rras	2.50012	2.74416	2.48019	2.66185	Up	1.23879	1.23199	-0.984445	-0.98436	0	9	16	16	15
Q8CGP2-2;Q8CBB6;P10853;P10854;Q64475;Q64478;Q64525;Q6ZWY9;Q8CGP1;Q8CGP2;P70696;G3X9D5;Q64524;Q8CGP0;Q9D2U9	Q8CGP2-2;Q8CBB6;P10853;P10854;Q64475;Q64478;Q64525;Q6ZWY9;Q8CGP1;Q8CGP2;P70696;G3X9D5	Histone H2B;Histone H2B type 1-F/J/L;Histone H2B type 1-M;Histone H2B type 1-B;Histone H2B type 1-H;Histone H2B type 2-B;Histone H2B type 1-C/E/G;Histone H2B type 1-K;Histone H2B type 1-P;Histone H2B type 1-A	Gm13646;Hist1h2bf;Hist1h2bm;Hist1h2bb;Hist1h2bh;Hist2h2bb;Hist1h2bc;Hist1h2bk;Hist1h2bp;Hist1h2ba	1.49912	2.30251	0.602482	0.0439273		0.746141	1.03464	-0.235977	0.0043216	0	60	42	55	49
P10922	P10922	Histone H1.0	H1f0	3.86185	4.25823	3.74373	4.24056	Up	1.90897	1.90851	-1.48811	-1.58057	3.3801e-88	14	12	23	14
P11031	P11031	Activated RNA polymerase II transcriptional coactivator p15	Sub1	-4.54117	-3.84833	-3.45256	-3.12478	Down	-2.22661	-1.71369	1.3804	1.20101	0	10	11	32	13
P11087;P11087-2;CON__Q862S4	P11087;P11087-2	Collagen alpha-1(I) chain	Col1a1	7.48428	6.67615	5.22212	4.88063	Up	3.69176	2.98888	-2.07741	-1.8223	0	185	157	284	270
P11152	P11152	Lipoprotein lipase	Lpl	-0.0271131	0.0362945	1.75041	1.27633		-0.00500037	0.0220482	-0.693551	-0.461104	1.7262e-104	2	4	5	3
P11157;D3Z0D8;F6RUC3	P11157	Ribonucleoside-diphosphate reductase subunit M2	Rrm2	-1.56679	-2.81349	-3.24015	-3.81808	Down	-0.762754	-1.2513	1.29572	1.46284	7.9828e-27	1	2	9	2
P11276	P11276	Fibronectin;Anastellin	Fn1	2.67866	3.15352	1.78748	1.58604		1.32665	1.41489	-0.708326	-0.578068	0	265	236	370	276
P11352	P11352	Glutathione peroxidase 1	Gpx1	2.17953	2.53419	0.680729	0.543057		1.081	1.13816	-0.267166	-0.184179	8.8336e-198	22	8	22	20
P11438	P11438	Lysosome-associated membrane glycoprotein 1	Lamp1	2.08187	2.44916	1.96001	2.24024		1.03295	1.10017	-0.777096	-0.825133	0	45	31	54	40
P11440;D3Z2T9	P11440;D3Z2T9	Cyclin-dependent kinase 1	Cdk1	-0.0931245	-0.184993	-0.272421	-0.24605		-0.037488	-0.076828	0.112767	0.113834	0	52	52	67	50
P11499;E9Q3D6;E9Q0C3;E9PX27;D3Z1R1	P11499	Heat shock protein HSP 90-beta	Hsp90ab1	-0.607713	-0.698291	-0.945779	-0.957747		-0.290745	-0.306181	0.381173	0.382612	0	453	457	656	642
P11688	P11688	Integrin alpha-5;Integrin alpha-5 heavy chain;Integrin alpha-5 light chain	Itga5	3.08323	2.94842	2.66726	2.39585	Up	1.52577	1.32325	-1.05901	-0.883901	0	54	46	64	56
P11862;D3YWD9;D3Z503;D6RDR2	P11862;D3YWD9	Growth arrest-specific protein 2	Gas2	0.723362	#VALUE!	-7.65379	-2.66723		0.364348	NaN	3.05504	1.02822	8.0317e-117	2	0	5	6
P11881;P11881-3;P11881-2;P11881-4;P11881-5;P11881-6;P11881-7;P11881-8;Q9Z329-2	P11881;P11881-3;P11881-2;P11881-4;P11881-5;P11881-6;P11881-7;P11881-8	Inositol 1,4,5-trisphosphate receptor type 1	Itpr1	2.28165	2.73328	1.51064	1.15883		1.13126	1.22712	-0.597977	-0.416731	9.5542e-35	4	2	9	5
P11928;Q8K469;Q05BJ7;Q924S2;Q8VI95;Q8VI97;Q8C2W3;D3YWG4	P11928;Q8K469;Q05BJ7	2-5-oligoadenylate synthase 1A	Oas1a;Oas1g	-4.65361	-4.17081	-6.54977	-5.51864	Down	-2.28195	-1.85778	2.61497	2.10507	2.7941e-231	6	15	13	24
P11983;P11983-2;F2Z483	P11983;P11983-2	T-complex protein 1 subunit alpha	Tcp1	0.0425327	-0.0825991	0.128268	0.0983199		0.0292761	-0.0310761	-0.0469508	-0.0162202	0	119	148	206	143
P12032	P12032	Metalloproteinase inhibitor 1	Timp1	1.93575	#VALUE!	-0.952442	-1.22398		0.961031	NaN	0.383829	0.483158	5.8719e-26	3	0	11	2
P12265;Q99KJ6;D3YY48	P12265	Beta-glucuronidase	Gusb	-0.806546	-1.00899	-0.400985	-0.228712		-0.388601	-0.445009	0.164014	0.107286	1.9652e-56	26	10	18	22
P12382	P12382	6-phosphofructokinase, liver type	Pfkl	-1.93731	-1.93314	-2.22682	-2.09811		-0.94511	-0.85794	0.891808	0.813278	0	73	44	84	56
P12388;F6ZFV0	P12388	Plasminogen activator inhibitor 2, macrophage	Serpinb2	-2.60275	-2.90856	-3.48826	-3.437	Down	-1.27261	-1.29378	1.39462	1.31892	0	17	9	26	5
P12815	P12815	Programmed cell death protein 6	Pdcd6	0.264836	-0.0837871	-0.311042	-0.171545		0.138683	-0.0316069	0.128161	0.0856966	1.1127e-132	11	22	17	13
P12970;D3YVE6;D3YXT4;D3Z3R0;D3YU93;F6YI27;F6VBB8;F6ZVW4;F6SSI5	P12970;D3YVE6;D3YXT4;D3Z3R0;D3YU93;F6YI27;F6VBB8;F6ZVW4	60S ribosomal protein L7a	Rpl7a;Rpl7a-ps10;Gm5619;Gm16477;Rpl7a-ps3;Gm17415;Gm4978;Gm5459	-0.18176	-0.29243	-0.100366	-0.0712454		-0.08111	-0.124833	0.0441843	0.0478175	0	69	79	77	99
P13011;Q99PL7	P13011;Q99PL7	Acyl-CoA desaturase 2	Scd2;Scd3	-0.0362757	-0.0180908	-2.64142	-2.39859		-0.00950975	-0.00225232	1.05707	0.926758	1.8705e-46	13	9	18	10
P13020;P13020-2;A6PWS5	P13020;P13020-2	Gelsolin	Gsn	0.580578	0.676809	0.630983	0.667996		0.294077	0.308244	-0.247337	-0.231363	0	177	122	171	137
P13439;D6RJ62	P13439	Uridine 5-monophosphate synthase;Orotate phosphoribosyltransferase;Orotidine 5-phosphate decarboxylase	Umps	-0.955156	-0.881778	-1.03824	-1.00348		-0.46174	-0.388167	0.418028	0.399882	0	47	75	48	43
P13595;E9Q589;P13595-3;P13595-4	P13595;E9Q589;P13595-3;P13595-4	Neural cell adhesion molecule 1	Ncam1	4.1152	3.39941	4.49976	4.3165	Up	2.03365	1.52477	-1.78946	-1.60924	0	81	75	89	79
P13864;P13864-2;J3QNW0	P13864;P13864-2;J3QNW0	DNA (cytosine-5)-methyltransferase 1	Dnmt1	-0.871109	-1.52662	0.00794813	0.326976		-0.420376	-0.676296	0.00100955	-0.102574	0	46	48	66	43
P14069	P14069	Protein S100-A6	S100a6	0.984001	-0.0288126	1.72853	0.85041		0.492622	-0.00704309	-0.684828	-0.300253	3.6938e-61	5	6	7	6
P14115	P14115	60S ribosomal protein L27a	Rpl27a	-0.212275	-0.394034	-0.150562	-0.212364		-0.0961287	-0.170232	0.0641931	0.101112	0	32	51	40	41
P14131	P14131	40S ribosomal protein S16	Rps16	0.0957625	0.0905293	0.113417	0.189452		0.0554733	0.0462816	-0.0410311	-0.0506368	1.7779e-133	48	63	66	63
P14148;F6XI62	P14148;F6XI62	60S ribosomal protein L7	Rpl7	-0.298283	-0.279501	-0.0887634	-0.128465		-0.138457	-0.119056	0.0395595	0.0694271	0	104	83	140	89
P14152;B1ATQ3	P14152	Malate dehydrogenase, cytoplasmic	Mdh1	0.6456	0.534197	0.826127	0.680663		0.326077	0.244522	-0.325124	-0.236147	0	41	41	57	39
P14206;D3YTT7	P14206;D3YTT7	40S ribosomal protein SA	Rpsa;Rpsa-ps10	0.218946	-0.559896	0.0816072	0.124876		0.116098	-0.244343	-0.0283516	-0.0262492	0	115	63	94	70
P14211	P14211	Calreticulin	Calr	1.20524	1.25713	0.741076	0.635485		0.601506	0.567545	-0.291221	-0.219085	0	135	178	173	125
P14576;E9PXC0;P14576-2	P14576;E9PXC0	Signal recognition particle 54 kDa protein	Srp54;Srp54c	1.0948	0.874791	1.29583	0.925607		0.547154	0.396707	-0.512349	-0.328652	1.3505e-170	36	20	42	23
P14602;P14602-2;P14602-3;D3YZ06	P14602;P14602-2;P14602-3;D3YZ06	Heat shock protein beta-1	Hspb1	5.97115	6.19627	5.25358	4.76762	Up	2.94707	2.77446	-2.08994	-1.77962	2.3702e-142	16	23	25	18
P14685;F7B7L8	P14685	26S proteasome non-ATPase regulatory subunit 3	Psmd3	0.490508	0.308454	0.418577	0.414976		0.249749	0.143655	-0.16267	-0.135808	0	86	71	114	73
P14733	P14733	Lamin-B1	Lmnb1	0.13944	-0.00853293	-0.997923	-3.44846		0.0769695	0.00201835	0.401958	1.32325	4.0325e-91	6	3	25	6
P14869	P14869	60S acidic ribosomal protein P0	Rplp0	-0.0782696	-0.620354	0.242562	0.212589		-0.0301772	-0.271357	-0.0925094	-0.0593747	0	83	70	59	74
P14873	P14873	Microtubule-associated protein 1B;MAP1 light chain LC1	Map1b	-3.78413	-4.32826	-3.38011	-2.89924	Down	-1.85402	-1.92813	1.35152	1.11583	0	103	77	134	85
P14901	P14901	Heme oxygenase 1	Hmox1	1.26793	1.41155	0.955836	1.18519		0.632361	0.636543	-0.376826	-0.426684	1.0218e-279	21	15	34	24
P15532;Q5NC80;Q5NC79	P15532;Q5NC80;Q5NC79	Nucleoside diphosphate kinase A;Nucleoside diphosphate kinase	Nme1	#VALUE!	0.0120368	-0.0223059	0.131066		NaN	0.0112093	0.0130691	-0.028587	0	0	10	6	12
P15626;Q8R5I6;O35660;F6Y363;D3YZ29;G5E8M7	P15626	Glutathione S-transferase Mu 2	Gstm2	3.62068	3.64241	4.43084	4.35574	Up	1.79027	1.63334	-1.762	-1.62407	0	66	68	114	82
P15864	P15864	Histone H1.2	Hist1h1c	2.82445	2.88155	2.29217	2.34606		1.39841	1.29337	-0.909499	-0.865096	0	2	4	2	3
P16045	P16045	Galectin-1	Lgals1	-0.491739	-0.4663	0.10568	0.0783984		-0.233668	-0.202522	-0.037947	-0.00869669	0	53	76	41	100
P16110;Q8C253	P16110;Q8C253	Galectin-3	Lgals3	-1.19323	-1.25168	0.134742	0.0952303		-0.578909	-0.553447	-0.0495315	-0.0150534	9.215e-187	46	46	66	49
P16125;D3Z7F0	P16125;D3Z7F0	L-lactate dehydrogenase B chain;L-lactate dehydrogenase	Ldhb	2.60169	2.5494	5.43479	5.59763	Up	1.28877	1.14496	-2.16217	-2.09308	9.9994e-131	8	9	13	8
P16254;A2AUM6	P16254;A2AUM6	Signal recognition particle 14 kDa protein	Srp14	0.751012	1.24884	1.24721	0.991026		0.377957	0.563841	-0.492972	-0.353358	0	8	11	1	10
P16330;P16330-2	P16330;P16330-2	2,3-cyclic-nucleotide 3-phosphodiesterase	Cnp	3.38939	3.89448	3.82142	#VALUE!	Up	1.67645	1.74597	-1.51907	#VALUE!	5.267e-09	1	3	1	0
P16332	P16332	Methylmalonyl-CoA mutase, mitochondrial	Mut	1.32616	1.43514	2.01639	2.0569		0.66102	0.647084	-0.799571	-0.755892	4.8286e-159	12	13	26	29
P16546	P16546	Spectrin alpha chain, brain	Sptan1	-0.570054	-0.319832	-2.04277	-2.1911		-0.27221	-0.137077	0.818442	0.848398	0	533	475	555	543
P16546-2	P16546-2			0.48335	0.746969	-0.889204	-1.22699		0.246226	0.339594	0.358621	0.484293	0	6	4	4	4
P16627	P16627	Heat shock 70 kDa protein 1-like	Hspa1l	2.07198	-1.26331	#VALUE!	-0.413541		1.02807	-0.558644	#VALUE!	0.177089	0	1	4	0	2
P16858;F8WJL5;D3Z0Z9;F6QXU4	P16858;F8WJL5	Glyceraldehyde-3-phosphate dehydrogenase	Gapdh	-2.05042	-2.77399	-2.26292	-2.19153		-1.00078	-1.23365	0.906198	0.848558	0	275	399	432	448
P17047;P17047-2;P17047-3	P17047;P17047-2;P17047-3	Lysosome-associated membrane glycoprotein 2	Lamp2	2.05308	1.9547	2.79583	3.07903		1.01878	0.879235	-1.11026	-1.14191	2.9328e-188	45	33	51	47
P17095	P17095	High mobility group protein HMG-I/HMG-Y	Hmga1	-3.43562	-3.07082	-1.93232	-1.34344		-1.68251	-1.36628	0.774418	0.528271	0	1	2	1	1
P17182;Q6PHC1;B0QZL1;B1ARR7;D3Z2S4;B1ARR6;D3YVD3	P17182;Q6PHC1	Alpha-enolase;Enolase	Eno1	-1.68865	-2.05418	-2.66344	-2.57568		-0.822733	-0.912021	1.06585	0.993638	0	352	769	462	780
P17426;P17426-2;F6TPX8;F6VSP9;E9PWD0	P17426;P17426-2	AP-2 complex subunit alpha-1	Ap2a1	0.0943518	-0.142099	-0.227627	-0.0653279		0.054779	-0.0576619	0.0949116	0.0455827	0	45	24	40	23
P17427	P17427	AP-2 complex subunit alpha-2	Ap2a2	0.712868	0.705883	1.03413	0.921628		0.359184	0.321235	-0.408033	-0.327149	0	100	63	89	73
P17439	P17439	Glucosylceramidase	Gba	3.16822	3.57362	3.37961	3.29875	Up	1.56759	1.6026	-1.34296	-1.22489	3.5596e-201	10	5	21	12
P17710-3;P17710;P17710-4;G3UVV4;P17710-2;D3Z365;D3YYR4;D3Z105;B4YB29	P17710-3;P17710;P17710-4;G3UVV4;P17710-2	Hexokinase-1	Hk1	3.19226	3.23979	4.13549	4.01819	Up	1.57942	1.45344	-1.64426	-1.49659	0	78	56	117	106
P17742;F8VPN3	P17742	Peptidyl-prolyl cis-trans isomerase A	Ppia	0.15275	0.102389	-0.0133284	-0.0270133		0.0835197	0.0515809	0.00949054	0.0311129	0	114	147	105	103
P17751;H7BXC3	P17751;H7BXC3	Triosephosphate isomerase	Tpi1	-2.87665	-3.09891	-3.18697	-3.22448	Down	-1.4074	-1.37883	1.27453	1.23866	0	92	144	109	127
P17809	P17809	Solute carrier family 2, facilitated glucose transporter member 1	Slc2a1	-0.609938	-0.740402	-0.865131	-0.768227		-0.291839	-0.324997	0.349026	0.311038	2.3981e-07	10	11	16	14
P17879	P17879	Heat shock 70 kDa protein 1B	Hspa1b	1	0.673418	2.62305	1.94928		0.500496	0.306729	-1.04139	-0.715249	0	2	1	1	2
P17918;J3QQ26	P17918;J3QQ26	Proliferating cell nuclear antigen	Pcna	-0.762667	-0.836669	-1.18736	-0.930988		-0.367006	-0.368011	0.47747	0.372506	0	86	71	97	57
P18155	P18155	Bifunctional methylenetetrahydrofolate dehydrogenase/cyclohydrolase, mitochondrial;NAD-dependent methylenetetrahydrofolate dehydrogenase;Methenyltetrahydrofolate cyclohydrolase	Mthfd2	-0.0355973	-0.173232	-0.0197944	0.0181159		-0.00917584	-0.0715728	0.012068	0.0140695	0	37	16	43	35
P18242;F6Y6L6;F8WIR1	P18242;F6Y6L6;F8WIR1	Cathepsin D	Ctsd	1.3232	1.97029	1.31124	0.919951		0.659559	0.886199	-0.518494	-0.326516	1.4809e-221	28	31	55	36
P18406	P18406	Protein CYR61	Cyr61	0.107024	1.86301	0.650973	-1.8952		0.0610158	0.838266	-0.255305	0.736648	2.227e-26	3	1	8	3
P18654;B1AXN9;B1AXP0;B1AXN5;B1AXN8;E9QK39;A2CEE7;E9PUP0;Q7TPS0;A2CEE5;Q7TPS0-3;A2CEE6;Q7TPS0-2;B2GVN8	P18654;B1AXN9	Ribosomal protein S6 kinase alpha-3	Rps6ka3	1.10001	1.31179	2.12296	1.99324		0.549718	0.591967	-0.842051	-0.731853	3.715e-166	22	15	35	31
F8WGL3;P18760	F8WGL3;P18760	Cofilin-1	Cfl1	-1.11938	-1.42159	-1.27722	-1.3323		-0.542563	-0.629367	0.513289	0.524064	0	76	150	136	128
P19096	P19096	Fatty acid synthase;[Acyl-carrier-protein] S-acetyltransferase;[Acyl-carrier-protein] S-malonyltransferase;3-oxoacyl-[acyl-carrier-protein] synthase;3-oxoacyl-[acyl-carrier-protein] reductase;3-hydroxypalmitoyl-[acyl-carrier-protein] dehydratase;Enoyl-[acyl-carrier-protein] reductase;Oleoyl-[acyl-carrier-protein] hydrolase	Fasn	-0.674851	-0.254177	-0.883271	-1.50322		-0.323787	-0.107741	0.356257	0.588613	0	372	490	458	575
P19157;P46425;F6RWR5	P19157;P46425	Glutathione S-transferase P 1;Glutathione S-transferase P 2	Gstp1;Gstp2	-2.31483	-2.10896	-2.34333	-2.34476		-1.1309	-0.936497	0.938248	0.906429	0	59	47	59	68
P19182;E9Q949;E9PZB9;F6TBT6;E9Q1E6;E9PVS0;E9QA50;E9QA38	P19182	Interferon-related developmental regulator 1	Ifrd1	-4.6983	-3.34655	-3.18202	-2.5603	Down	-2.30394	-1.48948	1.27256	0.98783	3.3744e-64	8	5	2	2
P19253;E9Q5A0;D3YY61	P19253;E9Q5A0	60S ribosomal protein L13a	Rpl13a	-0.111443	-0.125608	-0.079243	-0.0169053		-0.0465038	-0.0502932	0.0357646	0.0272955	6.7034e-201	46	49	61	46
P19324	P19324	Serpin H1	Serpinh1	2.21232	2.34664	1.72202	1.73507		1.09714	1.05436	-0.682233	-0.634352	0	278	444	303	352
P19783;D6RG40	P19783	Cytochrome c oxidase subunit 4 isoform 1, mitochondrial	Cox4i1	0.35787	0.52601	-0.366581	-0.211295		0.184471	0.240864	0.1503	0.100709	7.787e-132	24	22	22	18
P20029	P20029	78 kDa glucose-regulated protein	Hspa5	1.47878	1.23856	1.0908	1.09752		0.736129	0.559247	-0.430626	-0.393577	0	295	311	260	290
P20060	P20060	Beta-hexosaminidase subunit beta	Hexb	0.720857	0.73598	2.57752	2.70816		0.363115	0.334683	-1.02324	-1.00185	6.6397e-36	3	5	6	5
P20108	P20108	Thioredoxin-dependent peroxide reductase, mitochondrial	Prdx3	1.23771	1.47551	1.11464	1.01619		0.617487	0.66512	-0.440126	-0.362863	0	37	28	37	43
P20152;A2AKJ2;P03995;P03995-2;P46660;P08551	P20152	Vimentin	Vim	5.8368	6.04963	-0.478962	0.100213		2.88094	2.70894	0.195096	-0.0169353	0	408	517	424	307
P20352	P20352	Tissue factor	F3	3.75615	3.30722	7.40141	6.09403	Up	1.85695	1.48357	-2.94608	-2.28054	6.0985e-244	12	3	8	15
P21107	P21107	Tropomyosin alpha-3 chain	Tpm3	-3.03339	-2.64649	3.25234	5.05987		-1.48455	-1.17667	-1.29223	-1.88998	0	2	1	1	3
P21107-2;D3Z2H9	P21107-2;D3Z2H9		Tpm3-rs7	0.708751	0.663483	-0.11228	0.110857		0.357158	0.30229	0.0489337	-0.020955	0	30	30	43	27
P21126;F8WHM4	P21126	Ubiquitin-like protein 4A	Ubl4a	-0.101681	-0.132737	-0.0376959	-0.0363482		-0.0416993	-0.0534787	0.0192036	0.0346383	3.9275e-122	18	35	41	30
P21278;P27600;O70443	P21278	Guanine nucleotide-binding protein subunit alpha-11	Gna11	3.14209	3.32875	4.04897	4.13753	Up	1.55474	1.49319	-1.60977	-1.54166	0	17	26	34	24
P21279	P21279	Guanine nucleotide-binding protein G(q) subunit alpha	Gnaq	1.35348	1.27517	1.86096	2.08233		0.674461	0.575603	-0.737615	-0.765499	1.0874e-181	16	9	19	13
P21300	P21300	Aldose reductase-related protein 1	Akr1b7	-0.497433	-0.97102	-0.508871	#VALUE!		-0.236469	-0.428042	0.207018	#VALUE!	1.2989e-33	1	2	2	0
P21460;A2APX3	P21460	Cystatin-C	Cst3	#VALUE!	2.23014	-2.37061	-0.410501		NaN	1.00231	0.949124	0.17594	9.9305e-12	0	5	1	7
P21550;Q5SX59;J3QPZ9;Q5SX60;Q5SX61	P21550;Q5SX59	Beta-enolase;Enolase	Eno3	-5.68868	-5.43351	-8.35937	-6.79792	Down	-2.79136	-2.42198	3.33628	2.5882	0	14	28	22	25
P21956;P21956-2	P21956;P21956-2	Lactadherin	Mfge8	5.39277	4.95833	5.21512	4.81727	Up	2.66241	2.22132	-2.07461	-1.79837	3.1158e-134	9	15	35	20
P21958;Q3TBA3;F6QHF1	P21958;Q3TBA3;F6QHF1	Antigen peptide transporter 1	Tap1	-0.00904897	-0.497585	-1.79826	#VALUE!		0.00388999	-0.216501	0.720979	#VALUE!	1.2688e-15	3	2	6	0
P21981;G3UXE8	P21981	Protein-glutamine gamma-glutamyltransferase 2	Tgm2	3.49974	4.41429	6.78155	6.66987	Up	1.73075	1.97823	-2.699	-2.49802	1.0916e-145	7	1	31	16
P21995	P21995	Embigin	Emb	-0.686175	1.57535	-0.135646	-0.302469		-0.329359	0.709732	0.0582473	0.135141	5.0631e-15	4	4	7	4
Q544X6;P22315	Q544X6;P22315	Ferrochelatase;Ferrochelatase, mitochondrial	Fech	1.11878	2.04574	1.63384	1.11467		0.558953	0.919912	-0.647083	-0.400054	1.0888e-36	12	1	16	9
P22366;P22366-2;F6SPW1	P22366;P22366-2	Myeloid differentiation primary response protein MyD88	Myd88	-1.81521	-1.86367	-1.63454	-1.37089		-0.88502	-0.826898	0.655718	0.538637	1.1225e-27	6	5	11	9
P22437	P22437	Prostaglandin G/H synthase 1	Ptgs1	-0.890002	-0.672565	-1.64051	-1.73364		-0.429673	-0.294686	0.658097	0.675635	5.9296e-202	26	17	22	17
P22752;Q8BFU2;Q8CGP5;Q8CGP7;Q8R1M2;Q8CGP6	P22752;Q8BFU2;Q8CGP5;Q8CGP7;Q8R1M2;Q8CGP6	Histone H2A type 1;Histone H2A type 3;Histone H2A type 1-F;Histone H2A type 1-K;Histone H2A.J;Histone H2A type 1-H	Hist1h2ab;Hist3h2a;Hist1h2af;Hist1h2ak;H2afj;Hist1h2ah	1.60148	2.40136	0.558759	0.830797		0.796515	1.07881	-0.218548	-0.292846	3.1001e-258	7	14	13	15
Q8CBB7;P22892	Q8CBB7;P22892	AP-1 complex subunit gamma-1	Ap1g1	0.149151	0.378706	0.0832319	0.227985		0.0817487	0.175045	-0.0289992	-0.0651891	2.4491e-134	31	17	39	34
P22907;P22907-2	P22907;P22907-2	Porphobilinogen deaminase	Hmbs	-1.81278	-1.6463	-1.43525	-1.61166		-0.883822	-0.72977	0.57628	0.629566	3.7385e-144	9	16	17	12
P23116	P23116	Eukaryotic translation initiation factor 3 subunit A	Eif3a	-0.58788	-0.909362	-0.232707	-0.52082		-0.280983	-0.400492	0.0969364	0.217603	0	284	310	312	239
P23492;Q543K9;Q9D8C9	P23492;Q543K9;Q9D8C9	Purine nucleoside phosphorylase	Pnp;Pnp2	0.576032	0.497744	0.249438	0.339341		0.291839	0.228234	-0.09525	-0.107244	0	79	39	90	43
P23591	P23591	GDP-L-fucose synthase	Tsta3	-1.16612	-1.78693	-1.04041	-1.07035		-0.565567	-0.792607	0.418891	0.425137	0	18	15	26	22
P23780;Q8VC60	P23780	Beta-galactosidase	Glb1	1.15084	1.2311	1.867	2.14763		0.574731	0.555914	-0.740022	-0.79016	3.3133e-85	10	13	22	18
P23927	P23927	Alpha-crystallin B chain	Cryab	8.30156	6.66959	11.7557	8.83283	Up	4.09398	2.98596	-4.68175	-3.31488	3.3439e-52	22	15	18	9
P24270;A2AL20	P24270	Catalase	Cat	1.51359	1.27668	0.638723	0.522928		0.753262	0.57628	-0.250423	-0.176577	1.4188e-173	30	25	39	31
P24288;Q8CBC8;E9Q4K3;B2KFA8;B2KFA9;B2KFA7;B2KFA6;F6YUH3	P24288;Q8CBC8;E9Q4K3	Branched-chain-amino-acid aminotransferase, cytosolic;Branched-chain-amino-acid aminotransferase	Bcat1	-0.451347	-0.179481	-0.309715	0.508878		-0.213788	-0.0743651	0.127633	-0.171271	0	30	18	39	24
P24369	P24369	Peptidyl-prolyl cis-trans isomerase B	Ppib	1.14197	1.37101	0.46781	0.418418		0.570366	0.618427	-0.182295	-0.137108	0	79	38	57	66
P24472;F6SC55	P24472	Glutathione S-transferase A4	Gsta4	-2.73984	-2.7848	-0.969875	-0.590164		-1.34008	-1.23848	0.390778	0.243791	1.0409e-15	6	6	8	6
P24527	P24527	Leukotriene A-4 hydrolase	Lta4h	0.682778	0.451101	1.41064	1.28791		0.344374	0.207393	-0.558113	-0.46548	0	63	37	84	55
P24547	P24547	Inosine-5-monophosphate dehydrogenase 2	Impdh2	-1.21825	-1.24387	-1.21688	-1.14529		-0.591223	-0.549958	0.489235	0.453439	0	87	73	94	67
P24638;B7ZCF5;B7ZCF4	P24638;B7ZCF5	Lysosomal acid phosphatase	Acp2	2.99886	2.82775	3.1606	3.00317	Up	1.48424	1.26933	-1.25567	-1.11325	1.1357e-10	3	2	5	4
P24668	P24668	Cation-dependent mannose-6-phosphate receptor	M6pr	1.1769	0.273483	1.04644	0.244567		0.587557	0.128029	-0.412942	-0.0714516	0	18	10	30	9
P25085-2;P25085;Q3TBV5;A2AIU1	P25085-2;P25085;Q3TBV5;A2AIU1	Interleukin-1 receptor antagonist protein	Il1rn	4.18992	4.31239	0.874328	1.03965		2.07042	1.9327	-0.344337	-0.371721	0	12	11	15	11
P25206	P25206	DNA replication licensing factor MCM3	Mcm3	-0.70272	-0.569972	-0.91592	-0.868513		-0.337503	-0.248845	0.369271	0.348912	0	100	59	90	76
P25444;D3YWJ3;D3YVC1;D3Z659;J3QMG5;D3YWA0;F8VQ36;E9Q1N8;F6YTZ4;J3QM94;D3Z536	P25444;D3YWJ3;D3YVC1;D3Z659;J3QMG5;D3YWA0;F8VQ36;E9Q1N8;F6YTZ4;J3QM94;D3Z536	40S ribosomal protein S2	Rps2;Rps2-ps6;Gm6139;Gm4968;Rps2-ps5;Gm6576;Gm8225	-0.0119737	-0.0192228	0.112486	0.251759		0.00245056	-0.00275814	-0.0406601	-0.0741676	0	70	87	121	85
P25785;Q6PI17;B1AQJ3	P25785;Q6PI17;B1AQJ3	Metalloproteinase inhibitor 2	Timp2	4.81637	4.69621	5.9852	5.72102	Up	2.37873	2.1042	-2.38157	-2.13968	3.1275e-55	4	2	12	8
P26039;A2AIM2;F6SX70;F6S1V7	P26039	Talin-1	Tln1	-0.0243495	-0.160939	0.220939	-0.369022		-0.00364022	-0.06608	-0.0838902	0.160275	0	657	581	595	635
P26040	P26040	Ezrin	Ezr	-3.00628	-2.71412	-3.19146	-2.94724	Down	-1.47121	-1.20689	1.27632	1.13396	0	26	25	36	20
P26041	P26041	Moesin	Msn	0.316304	0.247378	0.330212	0.376306		0.164014	0.116365	-0.127447	-0.121204	0	301	204	286	217
P26043;Q7TSG6	P26043;Q7TSG6	Radixin	Rdx	1.75774	1.7455	2.6504	2.53644		0.87342	0.78576	-1.0523	-0.936994	0	52	45	77	71
P26231;Q65CL1;REV__Q9JMB1;REV__Q9JMB1-2	P26231	Catenin alpha-1	Ctnna1	0.687622	0.858071	-0.301758	-0.247462		0.346758	0.389236	0.124461	0.114367	0	105	48	128	90
P26350;J3QPK6	P26350	Prothymosin alpha;Thymosin alpha	Ptma	-1.94087	-1.63726	-1.96875	-1.97191		-0.946861	-0.725732	0.788936	0.76562	0	12	34	22	31
P26369;Q3KQM4	P26369;Q3KQM4	Splicing factor U2AF 65 kDa subunit	U2af2	-0.341646	-0.176151	-0.329539	-0.0292556		-0.159799	-0.0728773	0.135535	0.0319597	0	27	17	27	27
P26443	P26443	Glutamate dehydrogenase 1, mitochondrial	Glud1	3.35749	3.33551	3.34143	3.39002	Up	1.66075	1.49621	-1.32775	-1.25936	0	139	77	113	105
P26450;Q80UI5	P26450;Q80UI5	Phosphatidylinositol 3-kinase regulatory subunit alpha	Pik3r1	2.50422	0.968099	1.72411	1.70548		1.2408	0.438399	-0.683067	-0.623176	3.7676e-18	2	2	5	4
P26516	P26516	26S proteasome non-ATPase regulatory subunit 7	Psmd7	-0.242512	-0.14267	-0.110531	0.413591		-0.111009	-0.0579172	0.0482362	-0.135285	0	38	36	41	41
P26618;P26618-2	P26618;P26618-2	Platelet-derived growth factor receptor alpha	Pdgfra	4.44912	4.21356	5.48815	4.86851	Up	2.19799	1.88854	-2.18344	-1.81771	0	30	44	55	39
Q8C483;P26638;A2AFS0;A2AFS1;REV__Q8VC85	Q8C483;P26638;A2AFS0	Serine--tRNA ligase, cytoplasmic	Sars	-0.281327	-0.331036	-0.610587	-0.549296		-0.130113	-0.142083	0.247563	0.228357	0	65	67	90	70
P26645	P26645	Myristoylated alanine-rich C-kinase substrate	Marcks	2.31066	2.78106	3.28599	3.28236	Up	1.14555	1.24847	-1.30565	-1.2187	0	21	9	25	13
P27046;F6QMB7	P27046	Alpha-mannosidase 2	Man2a1	2.96863	2.9006	3.45495	3.3242	Up	1.46937	1.30188	-1.37299	-1.2345	0	128	101	121	96
P63163;P27048	P63163;P27048	Small nuclear ribonucleoprotein-associated protein N;Small nuclear ribonucleoprotein-associated protein B	Snrpn;Snrpb	-0.868208	-0.826933	-0.556529	-0.570108		-0.418948	-0.363661	0.226015	0.236217	1.0855e-182	40	19	31	19
P27546	P27546	Microtubule-associated protein 4	Map4	-1.30297	0.314877	1.40728	-0.117163		-0.63292	0.146525	-0.556775	0.0651587	0	143	102	187	105
P27601;Q9D034	P27601	Guanine nucleotide-binding protein subunit alpha-13	Gna13	1.40753	2.08256	2.01929	1.83961		0.701061	0.936365	-0.800727	-0.673831	1.0507e-146	6	3	15	4
P27612;F7D1R5	P27612	Phospholipase A-2-activating protein	Plaa	-0.237229	-0.320613	-0.262029	-0.0660682		-0.10841	-0.137426	0.108625	0.0458623	0	59	46	74	59
P27641	P27641	X-ray repair cross-complementing protein 5	Xrcc5	-0.138451	-0.306932	0.41028	-0.101797		-0.0597957	-0.131313	-0.159364	0.0593554	9.7296e-59	13	1	21	7
P27659;E9PWZ3;Q9CQ09	P27659	60S ribosomal protein L3	Rpl3	-0.327632	-0.569703	-0.260687	-0.446176		-0.152901	-0.248725	0.10809	0.189413	0	160	136	195	146
P27661	P27661	Histone H2A.x	H2afx	1.55143	1.95979	1.98446	0.621991		0.771886	0.881508	-0.786846	-0.213989	3.8595e-95	5	14	37	20
P27773;F6Q404	P27773	Protein disulfide-isomerase A3	Pdia3	1.0956	1.13616	0.304801	0.393171		0.547548	0.513491	-0.117318	-0.127573	0	223	215	247	230
P28063;G3UZW8	P28063;G3UZW8	Proteasome subunit beta type-8	Psmb8	-4.22493	-2.7677	-6.44342	-5.01147	Down	-2.07097	-1.23084	2.57257	1.91353	3.7582e-99	10	6	16	10
P28271	P28271	Cytoplasmic aconitate hydratase	Aco1	-0.238367	-0.141696	0.0231345	0.126782		-0.10897	-0.0574817	-0.00504385	-0.0269693	5.817e-215	33	17	44	34
P28301	P28301	Protein-lysine 6-oxidase	Lox	5.57036	5.85199	2.54551	2.39853	Up	2.74981	2.62063	-1.01048	-0.884913	0	20	18	30	16
P28352;F6QA74;D3Z124;D3Z6R9	P28352;F6QA74;D3Z124	DNA-(apurinic or apyrimidinic site) lyase;DNA-(apurinic or apyrimidinic site) lyase, mitochondrial	Apex1	-1.36783	-2.17671	-1.38416	-1.27097		-0.664837	-0.966771	0.555914	0.500904	0	50	20	53	30
P28474	P28474	Alcohol dehydrogenase class-3	Adh5	-1.95384	-2.10995	-1.24001	-0.963017		-0.953243	-0.936939	0.498455	0.384602	5.2167e-272	19	12	33	15
P28653	P28653	Biglycan	Bgn	2.72401	2.22126	0.345068	-0.0801048		1.34897	0.99834	-0.133369	0.0511633	1.7944e-82	42	39	53	40
P28654	P28654	Decorin	Dcn	6.88979	6.34864	7.89299	#VALUE!	Up	3.39917	2.84254	-3.14204	#VALUE!	2.1958e-05	2	2	1	0
E9PW66;P28656;J3QP68	E9PW66;P28656;J3QP68	Nucleosome assembly protein 1-like 1	Nap1l1	0.38611	1.09839	1.44813	1.14656		0.198368	0.496616	-0.573059	-0.412097	0	44	61	49	42
P28658	P28658	Ataxin-10	Atxn10	1.3393	1.30535	1.11896	1.14763		0.667483	0.589092	-0.44185	-0.412501	0	54	43	50	33
P28667	P28667	MARCKS-related protein	Marcksl1	-3.7311	-4.04076	-3.69285	-3.29237	Down	-1.82792	-1.79967	1.47617	1.2643	0	5	2	5	3
P28740-2;E0CZ72;P28740-1;P28740;F8VQ42;F6SUU5;Q9D481	P28740-2;E0CZ72;P28740-1;P28740;F8VQ42	Kinesin-like protein KIF2A	Kif2a	-0.748901	-1.40128	-0.770996	-0.67913		-0.360231	-0.62029	0.311503	0.27739	8.8132e-29	8	1	13	6
P28867-2;P28867;Q1MX42;Q1MX43;Q1MX40;Q1MX41;REV__Q6ZPL9;REV__E9Q9T6	P28867-2;P28867;Q1MX42;Q1MX43;Q1MX40;Q1MX41	Protein kinase C delta type	Prkcd	-0.0492585	-0.221397	-0.543509	-0.495771		-0.0158992	-0.093094	0.220825	0.208143	3.6899e-48	7	4	11	12
P29268;H3BJW0;H3BK14	P29268;H3BJW0	Connective tissue growth factor	Ctgf	2.59184	#VALUE!	-0.153676	-2.1775		1.28392	NaN	0.0654344	0.84326	7.9461e-23	4	0	16	1
P29341;F6ZAX1	P29341	Polyadenylate-binding protein 1	Pabpc1	-0.568248	-0.649556	-0.502597	-0.46889		-0.271322	-0.284405	0.204516	0.197991	0	146	94	126	98
P29391;Q9CPX4;P49945;H3BKD3	P29391;Q9CPX4;P49945;H3BKD3	Ferritin light chain 1;Ferritin;Ferritin light chain 2	Ftl1;Ftl2	-2.40789	-1.02693	1.38451	0.611018		-1.17671	-0.453024	-0.5477	-0.209845	1.0533e-188	21	19	29	22
P29416	P29416	Beta-hexosaminidase subunit alpha	Hexa	0.272547	1.00176	2.24288	1.97577		0.142479	0.453439	-0.889851	-0.725255	3.4637e-83	7	2	11	11
P29533;Q3UPN1;P29533-2	P29533;Q3UPN1	Vascular cell adhesion protein 1	Vcam1	-1.04547	-0.615176	-1.35846	-1.60771		-0.506189	-0.269043	0.545672	0.628074	7.055e-48	7	4	9	12
P29595	P29595	NEDD8	Nedd8	-2.32125	-2.36806	-3.11597	-4.01707		-1.13407	-1.05227	1.24623	1.53799	1.1245e-06	1	2	3	3
P29758	P29758	Ornithine aminotransferase, mitochondrial	Oat	3.50714	2.9465	3.29737	2.56639	Up	1.7344	1.32239	-1.31018	-0.948308	0	74	56	72	53
P30285;E9PZX7;E9Q9E4;D6RHS5	P30285;E9PZX7;E9Q9E4	Cyclin-dependent kinase 4	Cdk4	1.20137	0.9002	0.833345	0.94745		0.599603	0.40806	-0.328	-0.336901	2.0372e-154	21	15	31	16
P30412	P30412	Peptidyl-prolyl cis-trans isomerase C	Ppic	2.20023	2.5025	1.04235	1.15735		1.09119	1.124	-0.411311	-0.416173	0	28	11	27	17
P30416;D6RDE2;F7CAT1	P30416;D6RDE2	Peptidyl-prolyl cis-trans isomerase FKBP4;Peptidyl-prolyl cis-trans isomerase FKBP4, N-terminally processed;Peptidyl-prolyl cis-trans isomerase	Fkbp4	-1.68689	-1.45932	-1.76517	-1.65267		-0.821865	-0.646225	0.70779	0.645056	0	112	66	122	76
P30681	P30681	High mobility group protein B2	Hmgb2	-2.41984	-2.37092	-2.53821	-2.50344		-1.18259	-1.05355	1.01593	0.966357	0	44	44	47	63
Q3UZG4;P31230	Q3UZG4;P31230	Aminoacyl tRNA synthase complex-interacting multifunctional protein 1;Endothelial monocyte-activating polypeptide 2	Aimp1	-1.66187	-1.3191	-1.06657	-0.428043		-0.80955	-0.583571	0.429321	0.182565	0	33	27	37	30
P31266;F7BPQ6;P31266-2;E9Q7W0	P31266;F7BPQ6;P31266-2;E9Q7W0	Recombining binding protein suppressor of hairless	Rbpj;Rbpsuh-rs3	-1.72523	-0.246013	-0.806981	-0.854993		-0.840733	-0.104093	0.325847	0.343806	1.3989e-19	6	2	7	3
P31324;H3BK84	P31324;H3BK84	cAMP-dependent protein kinase type II-beta regulatory subunit	Prkar2b	-2.79218	-3.0943	-4.78495	-3.79153	Down	-1.36583	-1.37677	1.9115	1.45281	3.2454e-119	7	10	13	13
P31938	P31938	Dual specificity mitogen-activated protein kinase kinase 1	Map2k1	-1.65105	-0.882116	-0.501653	-1.25393		-0.804224	-0.388318	0.204141	0.494467	5.1557e-166	13	16	19	18
P32067;F6SXM5;A2AR07;D6RI87	P32067	Lupus La protein homolog	Ssb	-0.81635	-0.799589	-0.414206	-0.370388		-0.393425	-0.351443	0.169284	0.160791	0	53	72	57	37
P32233;F7BQ65	P32233	Developmentally-regulated GTP-binding protein 1	Drg1	-1.62846	-1.38074	-0.895973	-0.561667		-0.793107	-0.611116	0.361319	0.233029	3.1521e-239	31	27	27	32
P32507-2;P32507	P32507-2;P32507	Poliovirus receptor-related protein 2	Pvrl2	#VALUE!	0.412844	1.04697	1.79646		NaN	0.190299	-0.413154	-0.657536	1.533e-11	0	2	4	3
P32883-2;P32883;E9PVD5;E9Q8V2;B2KGV5	P32883-2;P32883	GTPase KRas;GTPase KRas, N-terminally processed	Kras	1.90152	2.28068	1.41485	1.46265		0.944184	1.02489	-0.559792	-0.531469	1.1725e-159	4	5	4	6
P32921;P32921-2;E0CXQ4;E0CXX4	P32921;P32921-2	Tryptophan--tRNA ligase, cytoplasmic;T1-TrpRS;T2-TrpRS	Wars	-1.66696	-1.73676	-1.62741	-1.46441		-0.812055	-0.770191	0.652876	0.573956	0	54	45	44	39
P33174	P33174	Chromosome-associated kinesin KIF4	Kif4	-0.636505	-0.785653	-0.704477	-0.571729		-0.304915	-0.345216	0.284988	0.236829	0	18	21	42	9
P33609	P33609	DNA polymerase alpha catalytic subunit	Pola1	-1.18318	-1.30539	-0.452307	-0.72456		-0.573961	-0.577444	0.184471	0.294547	9.2213e-174	29	13	35	25
P33610	P33610	DNA primase large subunit	Prim2	-0.385693	-0.469646	0.355324	0.234665		-0.181477	-0.204017	-0.137457	-0.067712	4.0089e-20	3	5	3	8
P33611;Q8C2T6	P33611;Q8C2T6	DNA polymerase alpha subunit B	Pola2	-2.16534	-2.16625	-0.608758	-1.3672		-1.05733	-0.962098	0.246834	0.537246	2.8251e-43	5	5	1	1
P34022;H7BX22	P34022;H7BX22	Ran-specific GTPase-activating protein	Ranbp1	-1.18833	-1.4317	-1.20396	-1.23817		-0.576497	-0.633882	0.484087	0.488515	0	30	28	44	30
P34152;P34152-2;P34152-4;P34152-3;P34152-5;P34152-6;P34152-7;P34152-9;P34152-8	P34152;P34152-2;P34152-4;P34152-3;P34152-5;P34152-6	Focal adhesion kinase 1	Ptk2	0.117403	-0.206725	0.570824	0.710656		0.0661237	-0.0865381	-0.223357	-0.247474	2.7576e-102	9	9	11	3
P34884	P34884	Macrophage migration inhibitory factor	Mif	-0.745931	-2.06898	#VALUE!	-1.91441		-0.358768	-0.918633	#VALUE!	0.743903	0	1	28	0	42
P35123;Q99K46	P35123	Ubiquitin carboxyl-terminal hydrolase 4	Usp4	-0.599263	-0.912218	-0.539159	-0.742272		-0.286586	-0.401768	0.219091	0.301236	6.4463e-188	13	6	38	29
P35235;P35235-2	P35235;P35235-2	Tyrosine-protein phosphatase non-receptor type 11	Ptpn11	-3.53837	-3.40538	-3.73191	-3.65529	Down	-1.73308	-1.51577	1.49175	1.40136	3.6372e-260	32	16	41	20
P35276;D3YW33;D3YWL1	P35276;D3YW33;D3YWL1	Ras-related protein Rab-3D	Rab3d	1.58659	1.68405	2.58148	2.55058		0.789187	0.758303	-1.02482	-0.942335	1.5181e-69	3	5	7	3
P35278;Q8C266;A2A5F5;A2A5F6	P35278;Q8C266	Ras-related protein Rab-5C	Rab5c	1.96944	1.99517	1.89424	1.99902		0.97761	0.897318	-0.750882	-0.734035	0	54	30	48	33
P35279	P35279	Ras-related protein Rab-6A	Rab6a	0.265369	0.208422	-0.39646	-0.287133		0.138945	0.0989585	0.16221	0.129349	0	30	39	55	38
P35282	P35282	Ras-related protein Rab-21	Rab21	2.77534	2.83017	2.53414	2.54691	Up	1.37423	1.27041	-1.00596	-0.940949	0	28	30	41	30
P35285;A2ARZ7;D6RFT6	P35285;A2ARZ7	Ras-related protein Rab-22A	Rab22a	1.07103	1.7638	1.07314	1.24569		0.535456	0.793938	-0.423584	-0.449533	1.645e-46	16	5	17	14
P35288;Q9D4I9	P35288;Q9D4I9	Ras-related protein Rab-23	Rab23	2.70749	3.15206	2.75496	2.03766	Up	1.34085	1.41424	-1.09397	-0.748626	6.0295e-119	17	14	27	15
P35293	P35293	Ras-related protein Rab-18	Rab18	1.57911	1.50187	0.942234	0.798874		0.785509	0.676899	-0.371404	-0.28079	0	43	28	42	41
Q80YQ1;P35441	Q80YQ1;P35441	Thrombospondin-1	Thbs1	1.62652	1.53522	-1.37923	-1.46441		0.808838	0.691802	0.55395	0.573956	0	73	72	121	86
P35486	P35486	Pyruvate dehydrogenase E1 component subunit alpha, somatic form, mitochondrial	Pdha1	2.31993	2.59824	3.31157	2.92511	Up	1.1501	1.16678	-1.31585	-1.08378	0	33	28	38	37
P35505;D3Z2R9	P35505	Fumarylacetoacetase	Fah	-3.80613	-4.90287	-5.16154	-5.67233	Down	-1.86486	-2.18488	2.0616	2.16311	1.7452e-119	6	8	8	5
P35550	P35550	rRNA 2-O-methyltransferase fibrillarin	Fbl	2.10428	1.45487	1.56963	1.61052		1.04397	0.655901	-0.621488	-0.587316	1.7858e-111	24	8	31	18
P35564	P35564	Calnexin	Canx	-0.52108	-0.527776	-0.761066	-0.63857		-0.248108	-0.229991	0.307545	0.262072	0	110	72	147	87
P35585;Q9WVP1-2;Q9WVP1	P35585	AP-1 complex subunit mu-1	Ap1m1	0.813503	0.217754	0.947668	0.600387		0.408712	0.103128	-0.37357	-0.20583	4.0433e-100	20	20	26	17
P35700;B1AXW6;B1AXW5;B1AXW4	P35700;B1AXW6;B1AXW5;B1AXW4	Peroxiredoxin-1	Prdx1	-0.116625	0.0448687	-0.395491	-0.486501		-0.0490538	0.0258793	0.161823	0.204642	0	118	89	96	133
P35762	P35762	CD81 antigen	Cd81	4.12807	5.40363	5.00083	5.01398	Up	2.03998	2.42029	-1.98919	-1.87266	0	29	32	39	24
P35821	P35821	Tyrosine-protein phosphatase non-receptor type 1	Ptpn1	1.48528	-1.71355	-2.35239	-1.5592		0.73933	-0.75982	0.941857	0.609755	3.8772e-38	1	5	6	3
P35831;D6RGT2;F6Z0X5	P35831	Tyrosine-protein phosphatase non-receptor type 12	Ptpn12	-2.76983	-1.76691	-1.69084	-1.45619		-1.35483	-0.783663	0.678162	0.570852	0	9	2	11	5
P35979;D3YX33;F8VQK7	P35979;D3YX33	60S ribosomal protein L12	Rpl12;Rpl12-ps1	0.0116347	0.0133182	0.00397205	-0.0169053		0.0140695	0.0117819	0.00259445	0.0272955	0	33	45	35	41
P35980;G3UZK4;G3UZJ6;G3UX28;G3UYV6	P35980;G3UZK4;G3UZJ6	60S ribosomal protein L18	Rpl18	-0.00291609	-0.12033	-0.17437	-0.125916		0.00690831	-0.0479348	0.0736831	0.0684644	0	46	36	46	40
P36552	P36552	Coproporphyrinogen-III oxidase, mitochondrial	Cpox	1.92716	1.96522	2.82445	3.1032		0.9568	0.883934	-1.12167	-1.15104	2.0948e-208	20	12	32	11
P36916;P36916-2	P36916;P36916-2	Guanine nucleotide-binding protein-like 1	Gnl1	-1.6843	-2.00881	-1.10374	-0.980244		-0.820591	-0.89175	0.444137	0.391108	4.818e-84	25	9	16	13
P37040;Q05DV1;E9Q997;E9PVT9;F6R7H8	P37040;Q05DV1	NADPH--cytochrome P450 reductase	Por	-0.143191	-0.143578	-1.05904	-1.07831		-0.0621284	-0.0583227	0.426318	0.428142	0	97	79	142	113
P37804	P37804	Transgelin	Tagln	4.88446	5.62163	6.26182	6.23217	Up	2.41224	2.5177	-2.49183	-2.33272	0	108	81	139	116
P37889;P37889-2	P37889;P37889-2	Fibulin-2	Fbln2	0.91933	0.404911	0.366729	0.480464		0.460795	0.186754	-0.142003	-0.16054	0	126	134	140	114
P38060;Q8JZS7;Q3TPS7;D3YVU9	P38060	Hydroxymethylglutaryl-CoA lyase, mitochondrial	Hmgcl	1.8913	2.0692	2.4474	1.92795		0.939151	0.930397	-0.971374	-0.707195	7.6804e-214	24	20	29	18
P38647	P38647	Stress-70 protein, mitochondrial	Hspa9	0.678387	0.501875	0.68609	0.798781		0.342213	0.23008	-0.269304	-0.280755	0	293	201	249	192
P39053-6;P39053;P39053-4;P39053-2;P39053-5;P39053-3;F6W8Z8;F6TH70;D6RH60	P39053-6;P39053;P39053-4;P39053-2;P39053-5;P39053-3	Dynamin-1	Dnm1	-1.77238	-1.82083	-0.50291	-0.183765		-0.86394	-0.807755	0.204642	0.0903114	3.1031e-155	30	6	14	9
P39054-2;F8WIV5;P39054;Q3T9X3;G3UZZ3;G3X9G4;Q3TCR7;G3UXX2;G3UY64	P39054-2;F8WIV5;P39054;Q3T9X3;G3UZZ3;G3X9G4;Q3TCR7	Dynamin-2	Dnm2	0.755296	0.955685	1.57303	1.68962		0.380064	0.432853	-0.622843	-0.617189	5.5688e-260	76	40	86	73
P39447	P39447	Tight junction protein ZO-1	Tjp1	-2.59944	-3.06567	-1.9247	-2.89113	Down	-1.27097	-1.36398	0.771379	1.11277	1.2963e-64	5	7	12	5
P39876;E9QAB2	P39876	Metalloproteinase inhibitor 3	Timp3	10.7773	#VALUE!	6.50168	5.00267	Up	5.31245	NaN	-2.58745	-1.86838	4.3532e-12	2	0	3	3
P40124;B1ARS0	P40124	Adenylyl cyclase-associated protein 1	Cap1	1.73896	1.84635	1.82397	1.85212		0.864176	0.830823	-0.722872	-0.678557	0	138	190	178	124
P40142	P40142	Transketolase	Tkt	-0.23565	-0.313977	-0.362665	-0.387096		-0.107632	-0.134461	0.148739	0.167101	0	134	90	134	153
P40240	P40240	CD9 antigen	Cd9	3.71468	4.04998	3.7128	3.97415	Up	1.83653	1.81545	-1.47578	-1.47995	1.2705e-246	17	29	30	22
P40336-2;P40336	P40336-2;P40336	Vacuolar protein sorting-associated protein 26A	Vps26a	0.435259	0.27496	0.641738	0.813614		0.222557	0.128689	-0.251625	-0.286357	4.1381e-211	32	11	36	17
P40630;P40630-2;D3Z0F3	P40630;P40630-2;D3Z0F3	Transcription factor A, mitochondrial	Tfam	0.677462	0.338419	2.13205	2.24322		0.341758	0.157044	-0.845676	-0.826258	9.7426e-18	2	3	7	2
P41105;F6Z0X0	P41105	60S ribosomal protein L28	Rpl28	0.04483	0.00433833	-0.160933	-0.0471485		0.0304067	0.00776951	0.0683267	0.0387171	8.8153e-111	71	65	59	59
P41241;D6RGA0;D3YVQ8	P41241	Tyrosine-protein kinase CSK	Csk	0.910798	0.672373	0.401399	0.454975		0.456596	0.306262	-0.155823	-0.150914	1.142e-32	3	10	5	7
P41731	P41731	CD63 antigen	Cd63	1.60148	1.26953	1.71506	2.08552		0.796515	0.573084	-0.679458	-0.766701	1.0819e-274	24	14	23	16
P42125	P42125	Enoyl-CoA delta isomerase 1, mitochondrial	Eci1	0.535768	0.567546	0.877546	0.962437		0.272023	0.259423	-0.345619	-0.342561	0	28	27	39	34
P42128	P42128	Forkhead box protein K1	Foxk1	-2.46064	#VALUE!	-1.95258	-3.31739		-1.20267	NaN	0.782492	1.27375	2.5038e-102	3	0	5	2
P42208;E9Q3V6;D3Z3C0;D3YYB1;F6WYM0;D3Z1S1;F6UKN5;D3YZU7;D3YV76;G3UYQ0	P42208;E9Q3V6;D3Z3C0;D3YYB1;F6WYM0	Septin-2	2002-09-01	-0.764445	-0.374979	0.384142	0.0619465		-0.367881	-0.161718	-0.148945	-0.00248353	0	47	56	73	58
P42227;P42227-3;P42227-2;B7ZC18	P42227;P42227-3;P42227-2;B7ZC18	Signal transducer and activator of transcription 3	Stat3	0.166825	0.219257	0.371204	0.197928		0.090447	0.1038	-0.143787	-0.0538381	0	76	36	91	71
P42230;B2C3G8;A2A5D3	P42230;B2C3G8	Signal transducer and activator of transcription 5A	Stat5a	3.15644	#VALUE!	3.09628	2.41571		1.56179	NaN	-1.23003	-0.891402	7.2213e-55	8	0	13	7
P42669	P42669	Transcriptional activator protein Pur-alpha	Pura	-0.0925529	0.467837	0.653825	-0.0542078		-0.0372067	0.214871	-0.256442	0.0413831	7.8253e-83	8	10	11	6
P42932;H3BL49;H3BJB6;H3BKG2;H3BLL1;H3BKR8	P42932;H3BL49	T-complex protein 1 subunit theta	Cct8	0.0385086	-0.0165068	-0.219824	-0.115702		0.0272956	-0.00154454	0.0918015	0.064607	0	194	138	179	170
P43247;G3UXD8	P43247	DNA mismatch repair protein Msh2	Msh2	-1.15971	-1.20922	-1.12628	-1.04695		-0.56241	-0.534475	0.453122	0.416299	2.3127e-195	28	7	41	23
P43274	P43274	Histone H1.4	Hist1h1e	3.58185	3.48282	2.64051	2.72058	Up	1.77117	1.56203	-1.04835	-1.00654	0	31	28	29	32
P43275	P43275	Histone H1.1	Hist1h1a	4.04661	4.24263	3.98753	3.58888	Up	1.99989	1.90153	-1.58528	-1.33446	0	13	12	17	11
P43276	P43276	Histone H1.5	Hist1h1b	3.22416	3.1534	2.93539	2.82782	Up	1.59512	1.41484	-1.16589	-1.04704	0	22	19	17	16
P43346	P43346	Deoxycytidine kinase	Dck	#VALUE!	0.344204	-0.842326	-0.385735		NaN	0.159629	0.339935	0.166587	1.7395e-15	0	4	7	5
P43406;A2AKI5;B7ZCI9;F6W6Q6;F6RWM8	P43406;A2AKI5	Integrin alpha-V;Integrin alpha-V heavy chain;Integrin alpha-V light chain	Itgav	1.09941	0.889475	0.322826	0.782388		0.549423	0.403268	-0.124503	-0.274564	0	71	59	89	61
P43883;B1AXR5;B1AXR3	P43883	Perilipin-2	Plin2	-0.574128	-1.24033	1.5136	1.27975		-0.274215	-0.548375	-0.599156	-0.462396	4.6878e-66	15	4	12	5
P45376;D3YVJ7	P45376	Aldose reductase	Akr1b1	-3.51992	-4.08547	-3.23601	-3.53243	Down	-1.72399	-1.81965	1.29408	1.35496	0	93	92	69	77
P45377	P45377	Aldose reductase-related protein 2	Akr1b8	-0.886174	-1.3979	-0.735535	-0.975872		-0.427789	-0.618783	0.297367	0.389457	0	38	52	40	45
P45591	P45591	Cofilin-2	Cfl2	-0.505802	-0.397959	-0.0312618	-0.138646		-0.240588	-0.171986	0.0166389	0.0732718	0	14	27	27	21
P45700;D3Z799	P45700;D3Z799	Mannosyl-oligosaccharide 1,2-alpha-mannosidase IA	Man1a1;Man1a	4.26258	3.58286	3.10232	4.1586	Up	2.10618	1.60673	-1.23243	-1.54962	1.3368e-83	4	1	4	2
P45878	P45878	Peptidyl-prolyl cis-trans isomerase FKBP2	Fkbp2	1.45421	1.39113	#VALUE!	1.09191		0.724039	0.62742	#VALUE!	-0.391456	1.2406e-105	5	11	0	15
P45952;D6RFD7	P45952	Medium-chain specific acyl-CoA dehydrogenase, mitochondrial	Acadm	1.46449	1.42337	1.67786	0.835433		0.729096	0.641823	-0.664631	-0.294597	0	13	16	18	15
P46061	P46061	Ran GTPase-activating protein 1	Rangap1	0.983375	0.639566	1.47602	0.841484		0.492315	0.291604	-0.584176	-0.296881	0	100	50	120	94
P46460;G3UX86;G3UX98	P46460	Vesicle-fusing ATPase	Nsf	3.06957	2.92304	2.86477	2.88412	Up	1.51904	1.31191	-1.13774	-1.0683	0	25	42	63	52
P46467	P46467	Vacuolar protein sorting-associated protein 4B	Vps4b	-1.35887	-1.17901	-1.38391	-1.54766		-0.660429	-0.520976	0.555816	0.6054	2.4516e-226	13	21	10	10
Q8BVQ9;P46471	Q8BVQ9;P46471	26S protease regulatory subunit 7	Psmc2	-0.922837	-0.819711	-0.864561	-0.807744		-0.445834	-0.360434	0.348799	0.325962	0	101	120	71	73
P46638;G3UZD3;F8WGS1;E9Q3P9;G3UY29;G3UZL4;Q9WTL2;D3YYB3;F6R2Z5	P46638;G3UZD3;F8WGS1;E9Q3P9;G3UY29	Ras-related protein Rab-11B	Rab11b;Rab11a	1.26226	1.25582	0.944153	0.928488		0.629566	0.566961	-0.372169	-0.32974	0	50	48	64	57
P46664	P46664	Adenylosuccinate synthetase isozyme 2	Adss	-1.53951	-1.6426	-1.32558	-1.10519		-0.749329	-0.72812	0.532566	0.438293	1.122e-296	27	49	25	29
P46718;A2T4N6	P46718;A2T4N6	Programmed cell death protein 2	Pdcd2	-2.96832	-2.43312	-2.42236	-2.26298		-1.45253	-1.08134	0.969749	0.875544	2.0669e-12	4	2	3	3
Q7TQD7;P46735;E9Q580;E9QNH6;P46735-2;D3YV80	Q7TQD7;P46735;E9Q580;E9QNH6;P46735-2	Unconventional myosin-Ib	Myo1b	-0.12662	-0.258181	-2.52709	-2.59921		-0.0539728	-0.10953	1.0115	1.00252	0	30	28	46	29
P46737;P46737-2;A3KGA8;E9Q0P6	P46737;P46737-2	Lys-63-specific deubiquitinase BRCC36	Brcc3	0.822764	0.353154	1.52959	1.83851		0.413269	0.163628	-0.60553	-0.673417	6.9413e-74	8	3	12	6
P46935	P46935	E3 ubiquitin-protein ligase NEDD4	Nedd4	0.145271	0.321871	1.75246	1.68149		0.0798389	0.14965	-0.694368	-0.614116	0	130	77	162	143
P46938;P46938-2;G3UYW7;G3UYV4;G3UY62;G3UYA6;Q9WVQ1;Q6RHR9-2;Q9WVQ1-2;Q9WVQ1-4	P46938;P46938-2;G3UYW7;G3UYV4;G3UY62;G3UYA6	Yorkie homolog	Yap1	-6.59124	-7.54849	-7.33372	-7.21796	Down	-3.23555	-3.367	2.92746	2.74683	0	21	12	23	10
P46978;D3YZN5	P46978	Dolichyl-diphosphooligosaccharide--protein glycosyltransferase subunit STT3A	Stt3a	1.71827	1.29611	0.957387	0.910382		0.853996	0.584962	-0.377444	-0.322902	5.6643e-113	52	44	93	57
P47199;D3YUG9;D3Z2X0;D3Z4Q4;D3YWU6	P47199	Quinone oxidoreductase	Cryz	-1.41964	-1.44475	-1.62948	-1		-0.690335	-0.639714	0.653702	0.398569	1.4747e-68	19	10	18	10
P47713;Q9DBX5	P47713;Q9DBX5	Cytosolic phospholipase A2;Phospholipase A2;Lysophospholipase	Pla2g4a	-0.540501	-0.770063	-0.941885	-0.902555		-0.257666	-0.33825	0.379621	0.361768	0	26	11	32	19
P47738;D3YYF3;Q62148;Q9CZS1;Q9JHW9;G3UWP3	P47738	Aldehyde dehydrogenase, mitochondrial	Aldh2	2.39543	2.38144	2.46625	2.39775		1.18726	1.06991	-0.97889	-0.88462	0	69	184	93	104
P47753;Q5RKN9	P47753;Q5RKN9	F-actin-capping protein subunit alpha-1	Capza1	0.529205	-0.220433	0.496588	0.4112		0.268794	-0.0926632	-0.193767	-0.134382	0	31	17	24	21
P47754;D6RCW7	P47754;D6RCW7	F-actin-capping protein subunit alpha-2	Capza2	0.6367	0.478392	0.527019	0.396303		0.321697	0.219587	-0.205896	-0.128756	0	58	41	41	37
A2AMV7;P47757-2;A2AMW0;F7CAZ6;F6YHZ8;F6QJN8	A2AMV7;P47757-2;A2AMW0;F7CAZ6		Capzb	0.509431	0.531469	0.446722	0.498827		0.259062	0.243303	-0.173889	-0.167474	0	75	83	80	93
P47791;P47791-2	P47791;P47791-2	Glutathione reductase, mitochondrial	Gsr	-2.4724	-2.42519	-2.55108	-2.55008		-1.20846	-1.0778	1.02105	0.983969	8.4954e-157	23	13	17	20
P47809;B1ATL6	P47809	Dual specificity mitogen-activated protein kinase kinase 4	Map2k4	0.188496	-0.340883	0.42811	-0.690146		0.101112	-0.146483	-0.16647	0.28155	5.1668e-64	3	11	10	5
P47811;P47811-4;P47811-3;B2KF35;P47811-2;B2KF34	P47811;P47811-4;P47811-3;B2KF35;P47811-2;B2KF34	Mitogen-activated protein kinase 14	Mapk14	-0.410531	-0.3678	-0.602652	-0.0534656		-0.193701	-0.15851	0.2444	0.0411028	7.4453e-83	10	9	16	9
P47856;P47856-2;D3YYD9;D3YYE0	P47856;P47856-2	Glucosamine--fructose-6-phosphate aminotransferase [isomerizing] 1	Gfpt1	0.187676	0.231851	0.183008	0.144963		0.100709	0.109427	-0.0687707	-0.0338353	0	82	49	73	65
P47857	P47857	6-phosphofructokinase, muscle type	Pfkm	1.35715	1.37437	1.52954	1.25975		0.676267	0.619929	-0.605508	-0.454842	0	22	11	25	12
P47880	P47880	Insulin-like growth factor-binding protein 6	Igfbp6	#VALUE!	3.67007	5.59866	5.14606	Up	NaN	1.6457	-2.22749	-1.92254	1.1387e-26	0	1	6	6
P47911;E9PUX4	P47911;E9PUX4	60S ribosomal protein L6	Rpl6;Gm5428	-1.0206	-0.884104	-0.622459	-0.53492		-0.493946	-0.389205	0.252295	0.222928	0	62	58	74	71
P47941	P47941	Crk-like protein	Crkl	-0.629416	-1.1849	-0.651211	-1.06408		-0.301426	-0.523608	0.263756	0.422771	1.5353e-158	24	8	19	14
P47955;E9Q3T0	P47955	60S acidic ribosomal protein P1	Rplp1	-0.134573	0.051205	0.509819	0.320049		-0.0578872	0.0287106	-0.19904	-0.0999582	0	2	14	2	43
P47962;D3YYV8	P47962;D3YYV8	60S ribosomal protein L5	Rpl5	0.0307319	-0.157527	-0.0753575	-0.0904143		0.0234683	-0.0645553	0.0342158	0.0550568	0	105	80	143	75
P47963;D3YX54	P47963;D3YX54	60S ribosomal protein L13	Rpl13;Rpl13-ps3	-0.154905	-0.151455	0.0262958	-0.200236		-0.0678935	-0.0618422	-0.00630399	0.0965318	0	44	34	40	38
P47968	P47968	Ribose-5-phosphate isomerase	Rpia	-1.42319	-1.01282	-0.831443	-1.11757		-0.692082	-0.446718	0.335598	0.44297	6.3648e-31	8	8	12	10
P48036	P48036	Annexin A5	Anxa5	-4.44695	-4.81697	-2.08541	-2.2584		-2.18023	-2.1465	0.835439	0.873813	0	70	88	108	93
P48428	P48428	Tubulin-specific chaperone A	Tbca	-0.847354	-0.806227	#VALUE!	-1.33548		-0.408684	-0.354409	#VALUE!	0.525267	3.0108e-168	3	25	0	21
P48678;P48678-2;P48678-3;D3YUF7	P48678;P48678-2;P48678-3	Prelamin-A/C;Lamin-A/C	Lmna	0.485575	0.923233	-0.320302	-0.510952		0.24732	0.418352	0.131853	0.213876	0	105	114	133	73
P48722;P48722-2;E0CY23;F6SMW7;F6TFH3	P48722;P48722-2;E0CY23	Heat shock 70 kDa protein 4L	Hspa4l	-0.941341	-0.916616	-0.968219	-1.23708		-0.454941	-0.403733	0.390117	0.488104	0	41	19	38	29
P48758	P48758	Carbonyl reductase [NADPH] 1	Cbr1	0.956369	0.844484	0.998716	1.04648		0.479024	0.383165	-0.393918	-0.374299	1.0151e-276	35	24	45	27
P48774;E9PVM7;E9PV63;E9Q024;E9Q5L9	P48774;E9PVM7;E9PV63	Glutathione S-transferase Mu 5	Gstm5	-0.094328	0.102389	0.866709	0.972819		-0.0380803	0.0515809	-0.341299	-0.346481	0	22	25	60	37
P48962	P48962	ADP/ATP translocase 1	Slc25a4	0.477165	0.719808	-1.22975	-1.01821		0.243182	0.327457	0.494364	0.405448	0	111	181	147	175
P49070	P49070	Calcium signal-modulating cyclophilin ligand	Camlg	1.55521	1.42812	1.80437	0.84106		0.773743	0.643949	-0.71506	-0.296722	1.9739e-13	3	1	5	2
Q5EBP8;P49312;J3QK72;P49312-2	Q5EBP8;P49312;J3QK72;P49312-2	Heterogeneous nuclear ribonucleoprotein A1	Hnrnpa1	1.50227	0.933604	1.11562	0.91952		0.747688	0.422986	-0.440518	-0.326353	0	111	59	104	65
P49442;H3BK26;E0CX64;E0CYQ4	P49442;H3BK26;E0CX64;E0CYQ4	Inositol polyphosphate 1-phosphatase	Inpp1	-0.393215	-0.000803788	0.123859	-0.190219		-0.185179	0.0054719	-0.0451932	0.0927488	5.6408e-16	6	5	6	4
P49443	P49443	Protein phosphatase 1A	Ppm1a	-2.59633	0.422168	-1.13315	-1.40909		-1.26944	0.194465	0.45586	0.553066	1.9668e-42	2	4	14	1
P49586;D3Z3T5	P49586;D3Z3T5	Choline-phosphate cytidylyltransferase A	Pcyt1a	0.466993	0.817637	0.295704	-0.221613		0.238175	0.371169	-0.113692	0.104605	5.6888e-57	12	8	22	8
P49615	P49615	Cyclin-dependent kinase 5	Cdk5	-1.25608	-1.08257	-0.585196	-0.435105		-0.609839	-0.477884	0.237441	0.185232	1.2598e-146	13	6	16	10
P49717	P49717	DNA replication licensing factor MCM4	Mcm4	-1.12374	-0.580808	-0.805247	-0.950122		-0.544708	-0.253687	0.325156	0.379732	0	109	43	85	84
P49722	P49722	Proteasome subunit alpha type-2	Psma2	-0.127381	-0.0378453	-0.349255	-0.26998		-0.0543474	-0.0110791	0.143394	0.122871	0	40	46	54	58
P49769;Q3U4P5;Q61144;Q61144-2	P49769;Q3U4P5;Q61144	Presenilin-1;Presenilin-1 NTF subunit;Presenilin-1 CTF subunit;Presenilin-1 CTF12;Presenilin-2;Presenilin-2 NTF subunit;Presenilin-2 CTF subunit	Psen1;Psen2	0.310019	1.27517	0.112151	0.264165		0.16092	0.575603	-0.0405265	-0.0788531	1.6516e-81	1	3	4	4
P49813	P49813	Tropomodulin-1	Tmod1	4.6909	6.00819	8.33671	4.62943	Up	2.31699	2.69042	-3.3189	-1.72743	2.9898e-46	4	3	3	4
P49817;H3BLK5;D3Z148;P51637	P49817;H3BLK5;D3Z148	Caveolin-1;Caveolin	Cav1	0.8082	0.843741	0.47126	1.54317		0.406101	0.382833	-0.183671	-0.561877	9.5763e-151	20	18	37	24
P49935	P49935	Pro-cathepsin H;Cathepsin H mini chain;Cathepsin H;Cathepsin H heavy chain;Cathepsin H light chain	Ctsh	6.91909	5.39935	8.68588	#VALUE!	Up	3.41359	2.41838	-3.45808	#VALUE!	4.9348e-05	1	2	2	0
P50247;A2ALT5	P50247	Adenosylhomocysteinase	Ahcy	-1.379	-1.84397	-1.56963	-1.491		-0.670337	-0.818096	0.629846	0.584	0	85	103	104	82
P50396;B7FAU8	P50396	Rab GDP dissociation inhibitor alpha	Gdi1	-1.20156	-1.11007	-0.639435	-0.519176		-0.583009	-0.490172	0.259062	0.216982	0	33	47	39	21
P50428;F6QGM0	P50428	Arylsulfatase A	Arsa	0.877717	1.13095	1.46979	2.88494		0.440314	0.511164	-0.581691	-1.0686	1.1584e-52	9	1	6	3
P50429;P50429-2	P50429;P50429-2	Arylsulfatase B	Arsb	1.39288	#VALUE!	0.770248	1.72276		0.693855	NaN	-0.302849	-0.629702	1.0137e-05	2	0	1	2
P50431;G3UYY1;G3UZZ9	P50431;G3UYY1	Serine hydroxymethyltransferase, cytosolic;Serine hydroxymethyltransferase	Shmt1	-4.01074	-3.7581	-4.75598	-3.0333	Down	-1.96556	-1.67337	1.89995	1.16646	5.6644e-174	9	27	18	11
P50516;P50516-2;D3Z1B9;D3YWH3;D3YZ23	P50516;P50516-2	V-type proton ATPase catalytic subunit A	Atp6v1a	-0.11799	-0.140957	0.306135	0.321563		-0.0497257	-0.0571515	-0.11785	-0.10053	0	71	42	86	59
P50518	P50518	V-type proton ATPase subunit E 1	Atp6v1e1	-0.128903	-0.0682802	0.0223717	-0.0564347		-0.0550966	-0.024678	-0.00473979	0.0422242	2.8693e-114	36	24	40	23
P50543;G5E8Y7;F6SJ35	P50543;G5E8Y7	Protein S100-A11	S100a11;Gm7665	1.63721	0.289104	#VALUE!	0.368587		0.814099	0.135009	#VALUE!	-0.118288	0	1	34	0	39
P50544;B1AR28	P50544;B1AR28	Very long-chain specific acyl-CoA dehydrogenase, mitochondrial	Acadvl	2.29924	2.23256	2.5132	2.26176		1.13993	1.00339	-0.997607	-0.833259	0	50	34	69	43
P50580;D3YVH7	P50580;D3YVH7	Proliferation-associated protein 2G4	Pa2g4	-0.143497	-0.75191	-0.206214	-0.346049		-0.0622789	-0.330139	0.0863762	0.151599	0	65	62	87	48
P50637	P50637	Translocator protein	Tspo	0.899456	2.33279	1.40255	1.36695		0.451013	1.04817	-0.554888	-0.495329	4.321e-44	1	4	1	12
P51125-6;Q8CE80	P51125-6;Q8CE80		Cast	-4.6639	-5.09026	-2.70727	-3.64486	Down	-2.28701	-2.26861	1.08332	1.39742	8.2614e-274	33	13	34	19
P51150	P51150	Ras-related protein Rab-7a	Rab7a	1.33117	1.37185	1.49016	1.5264		0.663481	0.618802	-0.589811	-0.555545	0	55	58	73	75
P51174	P51174	Long-chain specific acyl-CoA dehydrogenase, mitochondrial	Acadl	-1.14541	-0.470798	-0.807846	-1.3869		-0.555375	-0.204532	0.326192	0.544683	0	32	21	48	23
P51410;G3UW34;D3Z629;D3YZT0	P51410;G3UW34;D3Z629	60S ribosomal protein L9	Rpl9;Rpl9-ps6	-0.102919	-0.127046	-0.117874	-0.131741		-0.0423083	-0.0509358	0.0511633	0.0706641	0	28	70	66	70
P51432	P51432	1-phosphatidylinositol 4,5-bisphosphate phosphodiesterase beta-3	Plcb3	-1.27722	-1.20254	-1.57501	-1.55068		-0.620246	-0.53149	0.631989	0.606537	0	31	33	50	30
P51480;P51480-2	P51480;P51480-2	Cyclin-dependent kinase inhibitor 2A, isoforms 1/2	Cdkn2a	1.33135	1.68749	0.729403	0.841952		0.663572	0.759838	-0.286568	-0.297059	2.796e-162	5	7	9	7
P51655	P51655	Glypican-4;Secreted glypican-4	Gpc4	5.05979	5.12419	5.82402	5.98372	Up	2.49853	2.29543	-2.31732	-2.23888	1.6889e-81	19	10	17	10
P51660	P51660	Peroxisomal multifunctional enzyme type 2;(3R)-hydroxyacyl-CoA dehydrogenase;Enoyl-CoA hydratase 2	Hsd17b4	2.86356	2.31117	0.663088	0.387666		1.41765	1.03851	-0.260135	-0.125494	0	61	58	72	57
P51855;Q3UEE2;H3BKH4;A2AQN7;A2AQN9	P51855;Q3UEE2	Glutathione synthetase	Gss	-0.0305275	-0.214929	-0.0619012	-0.141912		-0.00668072	-0.0902039	0.028852	0.0745054	3.491e-45	10	13	6	9
P51859;E0CXA0;E0CYW7	P51859;E0CXA0	Hepatoma-derived growth factor	Hdgf	-1.9113	-2.34104	-1.15892	-1.01273		-0.932306	-1.0402	0.466131	0.403377	0	54	21	45	28
P51863	P51863	V-type proton ATPase subunit d 1	Atp6v0d1	1.23867	0.556197	1.08525	0.758342		0.617957	0.254352	-0.428411	-0.265483	2.7034e-260	26	6	23	18
P51881;Q3V132	P51881	ADP/ATP translocase 2	Slc25a5	-0.61439	-0.502804	-2.76018	-2.59539		-0.294031	-0.218833	1.1044	1.00108	0	39	31	46	43
P51949	P51949	CDK-activating kinase assembly factor MAT1	Mnat1	-2.69185	-2.42322	-2.95561	-2.44394		-1.31646	-1.07692	1.18231	0.943884	2.175e-15	6	2	2	4
P52019;Q3TSS7	P52019;Q3TSS7	Squalene monooxygenase	Sqle	3.66658	3.02026	1.41197	1.12002		1.81287	1.35535	-0.558644	-0.402073	1.0567e-130	12	7	12	8
P52196	P52196	Thiosulfate sulfurtransferase	Tst	#VALUE!	-0.120163	-1.08453	-0.712081		NaN	-0.0478603	0.436482	0.289834	6.1065e-06	0	1	2	2
P52293;A6PW68;A2A601;A2A600;A2A602;F2Z431	P52293	Importin subunit alpha-2	Kpna2	1.0155	0.916461	0.763868	0.763077		0.508124	0.415326	-0.300306	-0.267271	0	48	57	56	73
P52431;D6RFB8	P52431;D6RFB8	DNA polymerase delta catalytic subunit;DNA polymerase	Pold1	-0.826184	-1.20123	-1.69536	-1.6556		-0.398265	-0.530906	0.679964	0.646163	9.9179e-120	11	18	22	19
P52432;D3Z3D6;D3Z7Q8;G3UXX5;G3UX92	P52432;D3Z3D6;D3Z7Q8;G3UXX5	DNA-directed RNA polymerases I and III subunit RPAC1	Polr1c	-0.647136	-0.65881	-0.63641	0.467804		-0.310146	-0.28854	0.257855	-0.155759	4.1473e-17	4	1	5	2
P52479-2;P52479;G3X9U6;G3UYQ8	P52479-2;P52479	Ubiquitin carboxyl-terminal hydrolase 10	Usp10	-1.32941	-1.30192	-0.913677	-1.21523		-0.645932	-0.575895	0.368377	0.479851	1.3885e-64	12	4	3	7
P52480	P52480	Pyruvate kinase isozymes M1/M2	Pkm2	-1.54182	-1.60903	-1.78638	-1.71518		-0.75047	-0.713119	0.716245	0.668664	0	421	376	479	445
P52480-2;G3X925;P53657;E9Q509	P52480-2			3.61491	3.36774	3.36779	3.40467	Up	1.78743	1.51061	-1.33825	-1.26489	0	11	11	18	10
A2AN37;P52623;F7CBX2	A2AN37;P52623	Uridine kinase;Uridine-cytidine kinase 1	Uck1	0.245066	0.445224	1.05899	1.24616		0.128953	0.204767	-0.417945	-0.44971	1.4249e-18	4	1	5	3
P52633;D3YU28	P52633	Signal transducer and transcription activator 6	Stat6	1.76094	3.83864	0.497747	0.445866		0.874994	1.72102	-0.194229	-0.147474	2.6099e-14	4	1	7	7
P52800;F6RSU6	P52800;F6RSU6	Ephrin-B2	Efnb2	-1.59598	-0.473739	-1.09148	1.55531		-0.777121	-0.205846	0.439251	-0.566464	3.2958e-13	2	1	2	2
P52825;A2A8E8;A2A8E7;A2A8E9	P52825	Carnitine O-palmitoyltransferase 2, mitochondrial	Cpt2	1.6462	1.59954	2.1957	1.87641		0.818523	0.720541	-0.871047	-0.68773	5.8244e-124	24	10	27	18
P52875	P52875	Transmembrane protein 165	Tmem165	0.290288	0.474784	1.468	1.21954		0.151209	0.217975	-0.580979	-0.439657	4.0926e-26	3	8	1	1
P52927;Q6NSP9	P52927;Q6NSP9	High mobility group protein HMGI-C	Hmga2	-1.56038	0.425552	-3.56681	#VALUE!		-0.7596	0.195977	1.42594	#VALUE!	2.6941e-248	6	1	9	0
P53395	P53395	Lipoamide acyltransferase component of branched-chain alpha-keto acid dehydrogenase complex, mitochondrial	Dbt	3.6522	3.92266	5.83629	5.04912	Up	1.80579	1.75856	-2.32222	-1.88593	5.3536e-36	12	17	13	8
P53569;P53569-2	P53569;P53569-2	CCAAT/enhancer-binding protein zeta	Cebpz	0.624948	0.503527	0.0524177	-0.0538368		0.315914	0.230818	-0.0167163	0.041243	1.5178e-92	6	17	22	18
P53612;Q3TVF4	P53612;Q3TVF4	Geranylgeranyl transferase type-2 subunit beta	Rabggtb	-1.94675	-1.97467	-0.835743	0.555752		-0.949756	-0.876493	0.337311	-0.188973	1.2734e-09	5	2	6	3
P53690;Q9R0S2	P53690	Matrix metalloproteinase-14	Mmp14	6.11716	2.98895	5.24603	2.99326	Up	3.01892	1.34136	-2.08694	-1.10951	1.4861e-74	7	2	22	15
P53702;G3UXK7	P53702	Cytochrome c-type heme lyase	Hccs	2.44166	2.69094	2.44839	1.83084		1.21001	1.2082	-0.97177	-0.67052	2.6052e-55	5	6	13	5
P53798	P53798	Squalene synthase	Fdft1	1.65085	2.17438	-0.867118	-1.67775		0.820812	0.97739	0.349818	0.654527	1.0115e-207	11	16	27	19
P53810;J3QPW1;J3QQ30;F8WGG5	P53810;J3QPW1;J3QQ30	Phosphatidylinositol transfer protein alpha isoform	Pitpna	1.58013	1.53642	1.92347	2.0662		0.786011	0.692338	-0.762534	-0.759405	9.5906e-127	22	15	28	19
P53811	P53811	Phosphatidylinositol transfer protein beta isoform	Pitpnb	-1.08728	-0.870599	-0.637619	-0.886169		-0.526764	-0.383172	0.258338	0.35558	9.2413e-120	30	27	43	26
P53986	P53986	Monocarboxylate transporter 1	Slc16a1	0.614096	-0.541325	0.616192	0.0738666		0.310573	-0.236045	-0.241441	-0.00698516	2.6222e-303	6	8	9	4
P53994	P53994	Ras-related protein Rab-2A	Rab2a	1.5516	1.54719	0.681993	0.638422		0.77197	0.697151	-0.26767	-0.220194	0	50	59	63	77
P53995;A2ATQ5;Q6PG65	P53995;A2ATQ5	Anaphase-promoting complex subunit 1	Anapc1	-0.00291609	-0.579347	0.138528	-0.0727237		0.00690831	-0.253034	-0.0510405	0.0483758	0	19	18	73	20
P53996	P53996	Cellular nucleic acid-binding protein	Cnbp	-0.679992	-0.266831	-0.350894	-1.27502		-0.326317	-0.113395	0.144046	0.502432	0	4	4	6	5
P53996-3;P53996-2;D3YYF6	P53996-3;P53996-2;D3YYF6		Cnbp	-0.433148	-0.56721	-0.643667	-0.576914		-0.204831	-0.247611	0.260748	0.238787	0	46	43	55	53
P54071;D6RIL6	P54071	Isocitrate dehydrogenase [NADP], mitochondrial	Idh2	1.34649	0.787287	1.66475	1.53219		0.671022	0.357608	-0.659403	-0.557731	0	67	75	78	73
P54103;E9Q9H3;E9Q9H2;Q3TRX6	P54103;E9Q9H3;E9Q9H2	DnaJ homolog subfamily C member 2	Dnajc2	-1.72455	-1.70078	-1.18788	-1.06408		-0.840397	-0.754115	0.477677	0.422771	0	21	23	29	25
P54116	P54116	Erythrocyte band 7 integral membrane protein	Stom	0.679079	0.746713	-0.560242	-0.544728		0.342555	0.33948	0.227495	0.226632	1.174e-186	24	14	28	12
P54227;D3Z5N2;D3Z1Z8;G3X9Z6;D3Z4C2;P63042;Q05DI3;REV__Q9WTN3;REV__Q9WTN3-3;REV__Q9WTN3-2;REV__F6XZS9;REV__Q9WTN3-4	P54227;D3Z5N2;D3Z1Z8	Stathmin	Stmn1	-0.53371	-0.707646	-0.332505	-0.30664		-0.254324	-0.310361	0.136716	0.136716	2.14e-260	8	8	14	10
P54276	P54276	DNA mismatch repair protein Msh6	Msh6	-1.49632	-1.43796	-1.45848	-1.81082		-0.728072	-0.636683	0.585539	0.704783	4.0131e-276	34	35	53	37
P54728	P54728	UV excision repair protein RAD23 homolog B	Rad23b	-0.156934	-0.193381	0.101632	0.143164		-0.0688919	-0.080576	-0.0363334	-0.0331561	0	41	37	48	43
P54729	P54729	NEDD8 ultimate buster 1	Nub1	-1.49471	-1.20772	-2.55268	-2.53654		-0.727284	-0.533806	1.02169	0.978855	2.6337e-160	21	4	23	9
P54731	P54731	FAS-associated factor 1	Faf1	0.203488	-0.0107907	-0.114729	-0.179457		0.108491	0.00100953	0.0499095	0.0886845	9.1796e-86	10	8	19	12
P54775	P54775	26S protease regulatory subunit 6B	Psmc4	0.0745299	-0.108668	-0.122063	0.0855152		0.0450235	-0.0427243	0.0528332	-0.0113844	0	50	98	71	51
P54822;E9Q242;E9Q3T7;E9Q0A0	P54822;E9Q242;E9Q3T7	Adenylosuccinate lyase	Adsl	-0.863313	-0.740483	-0.271751	-0.318436		-0.416539	-0.325033	0.1125	0.141171	1.8399e-289	43	54	34	28
P54823	P54823	Probable ATP-dependent RNA helicase DDX6	Ddx6	0.174249	0.277028	0.39584	0.274267		0.0941009	0.129613	-0.153607	-0.0826675	0	37	38	45	38
P54923	P54923	[Protein ADP-ribosylarginine] hydrolase	Adprh	0.864725	-0.293345	1.40159	1.91724		0.433921	-0.125242	-0.554506	-0.703149	3.0144e-215	25	5	36	8
P55096	P55096	ATP-binding cassette sub-family D member 3	Abcd3	1.38017	1.6412	1.14496	1.13697		0.687598	0.739157	-0.452215	-0.408474	5.8846e-122	20	3	21	8
P55258;Q3TYH2;Q8K386	P55258	Ras-related protein Rab-8A	Rab8a	1.64304	1.68176	1.21476	1.44134		0.816968	0.757279	-0.480035	-0.523421	0	12	13	23	13
P55264	P55264	Adenosine kinase	Adk	-0.100565	0.195735	1.10478	0.497368		-0.0411499	0.0932897	-0.436197	-0.166924	0	30	32	61	28
P55288;J3QN48;J3QPW4;J3QMZ6;J3QP17	P55288	Cadherin-11	Cdh11	-3.16895	#VALUE!	-2.13417	-2.48895		-1.55127	NaN	0.854873	0.960882	3.9797e-83	7	0	7	5
P55302;F6WMD1	P55302	Alpha-2-macroglobulin receptor-associated protein	Lrpap1	2.33785	2.73948	2.74054	2.11547		1.15892	1.2299	-1.08822	-0.778012	3.1614e-126	13	15	34	18
P55821	P55821	Stathmin-2	Stmn2	1.52453	1.50248	1.14878	2.57444		0.758644	0.67717	-0.453735	-0.951345	6.9818e-88	15	12	12	6
P56183;P56183-3;P56183-2	P56183;P56183-3;P56183-2	Ribosomal RNA processing protein 1 homolog A	Rrp1	0.714696	0.248569	0.374563	0.461553		0.360083	0.116897	-0.145127	-0.153398	3.1421e-111	2	6	8	6
E9Q827;P56212;P56212-2;E9Q4B9;E9PXD7	E9Q827;P56212;P56212-2;E9Q4B9	cAMP-regulated phosphoprotein 19	Arpp19	-2.34216	-2.66668	-1.59109	-1.53434		-1.14436	-1.1857	0.638398	0.600365	1.1807e-133	5	6	16	6
P56213	P56213	FAD-linked sulfhydryl oxidase ALR	Gfer	0.337161	-0.439108	0.827806	1.03703		0.174279	-0.190371	-0.325792	-0.370732	7.2642e-27	9	5	15	8
P56380	P56380	Bis(5-nucleosyl)-tetraphosphatase [asymmetrical]	Nudt2	-0.453897	-0.270011	-1.21662	-1.30484		-0.215044	-0.114816	0.489132	0.513693	7.5013e-219	11	16	22	16
P56480	P56480	ATP synthase subunit beta, mitochondrial	Atp5b	-0.369714	-0.392725	-1.75052	-2.00034		-0.173612	-0.169647	0.701948	0.776357	0	203	291	146	164
P56695;Q3UN10;F7D926	P56695;Q3UN10	Wolframin	Wfs1	2.90127	#VALUE!	3.86462	4.29314	Up	1.43622	NaN	-1.53629	-1.60042	1.9124e-59	1	0	4	2
P56812	P56812	Programmed cell death protein 5	Pdcd5	-1.05339	-1.10971	#VALUE!	-0.626127		-0.510087	-0.49001	#VALUE!	0.257373	3.8544e-251	1	21	0	33
P56873;E0CYU9	P56873	Sjoegren syndrome/scleroderma autoantigen 1 homolog	Sssca1	-2.97412	-2.94583	-2.2424	-2.24503		-1.45538	-1.31043	0.898015	0.868766	2.4041e-215	18	13	17	13
P56959;Q8CFQ9;G3UXT7;Q91VQ2;G3UZD2	P56959;Q8CFQ9;G3UXT7	RNA-binding protein FUS	Fus	0.249351	0.423016	0.805601	0.752379		0.131063	0.194844	-0.316941	-0.263231	2.5334e-134	12	8	19	8
P56960;Q8K366;F6VYQ6	P56960;Q8K366;F6VYQ6	Exosome component 10	Exosc10	-0.0969778	#VALUE!	0.144532	-0.11095		-0.0393845	NaN	-0.0534339	0.0628124	5.1802e-46	6	0	19	14
P57080	P57080	Ubiquitin carboxyl-terminal hydrolase 25	Usp25	-1.16365	-0.774803	-1.43768	-1.4265		-0.56435	-0.340368	0.577248	0.559639	7.255e-20	2	6	6	3
P57716;D6RCJ2	P57716	Nicastrin	Ncstn	1.31428	1.17035	0.90168	1.0247		0.655169	0.528771	-0.355239	-0.366076	4.5001e-123	16	19	23	22
P57724	P57724	Poly(rC)-binding protein 4	Pcbp4	3.51551	-2.56496	-1.89981	-2.64489		1.73851	-1.14025	0.761455	1.01977	1.4831e-27	2	3	10	4
P57746	P57746	V-type proton ATPase subunit D	Atp6v1d	-0.515273	-0.601392	-0.0929868	-0.275591		-0.245249	-0.262884	0.041243	0.12499	3.7435e-244	13	6	19	7
P57759;D6RG87;F8WIM7;F8WJI4	P57759	Endoplasmic reticulum resident protein 29	Erp29	1.1532	0.779214	-0.0658012	0.587807		0.575893	0.354001	0.0304066	-0.201079	1.3605e-287	27	50	53	34
P57780;E9Q2W9	P57780;E9Q2W9	Alpha-actinin-4	Actn4	0.976072	1.09541	0.144832	0.243684		0.488721	0.495286	-0.0535536	-0.0711181	0	280	177	329	303
P57784;G5E883	P57784;G5E883	U2 small nuclear ribonucleoprotein A	Snrpa1	-0.145365	-0.427927	-0.180212	-0.525089		-0.0631981	-0.185376	0.0760118	0.219215	0	24	27	27	36
P58021;E9PZ69	P58021;E9PZ69	Transmembrane 9 superfamily member 2	Tm9sf2	1.18974	0.425272	1.77874	1.31348		0.59388	0.195852	-0.704841	-0.475134	1.5392e-11	3	1	7	2
G3XA48;P58044;H3BLF8;H3BKD7;H3BLP1	G3XA48;P58044;H3BLF8	Isopentenyl-diphosphate Delta-isomerase 1	Idi1	-0.351915	-0.262677	-2.48846	-2.3368		-0.164852	-0.111539	0.9961	0.903424	0	28	28	50	37
P58064	P58064	28S ribosomal protein S6, mitochondrial	Mrps6	0.680467	1.0648	#VALUE!	0.863652		0.343237	0.481609	#VALUE!	-0.305254	1.0258e-39	7	16	0	16
P58252	P58252	Elongation factor 2	Eef2	-0.541553	-0.53005	-0.0515983	-0.0307498		-0.258184	-0.231007	0.0247452	0.032524	0	468	489	453	534
P58389;A2AWE9;A2AWF0;B7ZDE0;F6Z6I0;D6RFC2	P58389;A2AWE9	Serine/threonine-protein phosphatase 2A activator	Ppp2r4	-0.275079	-0.794853	-0.312698	-0.292717		-0.127037	-0.349327	0.128821	0.131458	9.0183e-171	24	14	26	18
P58404;P58404-2	P58404;P58404-2	Striatin-4	Strn4	-1.05682	2.83057	-0.902165	-1.33707		-0.511773	1.27059	0.363788	0.525868	5.5381e-59	1	3	3	4
P58468	P58468	Protein FAM207A	Fam207a	-0.999864	-1.2316	-0.0348377	-0.754344		-0.483743	-0.544477	0.0180643	0.305795	5.0631e-101	5	5	5	3
P58742	P58742	Aladin	Aaas	0.919757	0.740583	0.20857	0.459643		0.461005	0.33674	-0.0789599	-0.152676	8.0091e-106	9	11	11	14
P58771-2;E9Q454;P58771;Q8BSH3;E9Q452	P58771-2;E9Q454;P58771;Q8BSH3;E9Q452	Tropomyosin alpha-1 chain	Tpm1	3.40851	3.12212	2.28809	2.33223		1.68585	1.40087	-0.907874	-0.859876	0	164	141	169	188
P58774	P58774	Tropomyosin beta chain	Tpm2	6.09447	6.46495	7.36975	7.1225	Up	3.00775	2.89451	-2.93346	-2.66896	0	1	2	2	3
P58871	P58871	182 kDa tankyrase-1-binding protein	Tnks1bp1	-2.7817	-1.70634	-1.07167	-2.38833		-1.36068	-0.756599	0.431356	0.922883	0	46	33	66	47
P59017	P59017	Bcl-2-like protein 13	Bcl2l13	0.542315	-1.71595	-0.53169	-1.3384		0.275245	-0.760895	0.216113	0.526369	1.1481e-76	12	3	9	11
P59024;D6RDT0;D3YWB6	P59024;D6RDT0;D3YWB6	Peptidyl-prolyl cis-trans isomerase FKBP14;Peptidyl-prolyl cis-trans isomerase	Fkbp14	5.15773	4.84043	5.19824	4.8716	Up	2.54673	2.16864	-2.06788	-1.81888	3.869e-74	4	5	16	8
P59048;D6RFC3;D6RFQ5	P59048	p53 and DNA damage-regulated protein 1	Pdrg1	0.491002	-1.02344	-1.26401	-0.685742		0.249991	-0.451465	0.508023	0.279887	1.8512e-11	1	4	6	2
P59235	P59235	Nucleoporin Nup43	Nup43	-1.66891	-1.11633	-0.929625	-1.47287		-0.813018	-0.492972	0.374734	0.577151	4.2422e-63	8	4	5	4
P59279;Q3TEG7;G3V022;G3UXQ7	P59279;Q3TEG7	Ras-related protein Rab-2B	Rab2b	2.42603	0.632171	2.39121	2.25285		1.20232	0.288299	-0.948976	-0.829896	0	4	1	9	3
P59325	P59325	Eukaryotic translation initiation factor 5	Eif5	-1.65679	-1.81976	-2.22448	-2.19131		-0.807048	-0.807276	0.890875	0.848478	1.2289e-303	39	33	47	38
P59708	P59708	Pre-mRNA branch site protein p14	Sf3b14	0.381763	0.450262	-0.286452	-0.165781		0.196229	0.207018	0.11836	0.0835198	7.683e-76	6	12	11	12
P59999;E9PWA7	P59999;E9PWA7	Actin-related protein 2/3 complex subunit 4	Arpc4	0.886562	0.781739	0.474634	0.584998		0.444667	0.355129	-0.185015	-0.200017	0	26	19	33	37
P60122;D3YW60	P60122	RuvB-like 1	Ruvbl1	-1.13106	-1.20105	-1.12787	-1.13971		-0.548311	-0.530823	0.453755	0.45133	0	37	75	22	37
P60229	P60229	Eukaryotic translation initiation factor 3 subunit E	Eif3e	-0.010511	-0.737734	-0.51232	-0.99942		0.00317045	-0.323805	0.208392	0.39835	0	59	74	79	65
P60335	P60335	Poly(rC)-binding protein 1	Pcbp1	-2.26763	-2.35595	-2.21217	-1.71638		-1.10768	-1.04686	0.885965	0.669118	0	57	45	74	56
P60605;G3UZX2;G3UYT0	P60605	Ubiquitin-conjugating enzyme E2 G2	Ube2g2	0.621179	1.05438	0.761773	#VALUE!		0.314058	0.476952	-0.299471	#VALUE!	5.8452e-39	2	4	9	0
P60670;P60670-2	P60670;P60670-2	Nuclear protein localization protein 4 homolog	Nploc4	0.469726	-0.0309548	0.666906	0.896314		0.23952	-0.00800024	-0.261656	-0.317588	5.5844e-300	36	14	36	23
P60766;P60766-1	P60766;P60766-1	Cell division control protein 42 homolog	Cdc42	-0.0134375	-0.0413937	0.11297	0.170546		0.00173014	-0.0126646	-0.0408531	-0.0434971	0	34	40	42	50
P60824;K4DI65;D3YU80	P60824;K4DI65;D3YU80	Cold-inducible RNA-binding protein	Cirbp	3.49877	2.68451	3.90506	3.55952	Up	1.73027	1.20533	-1.55241	-1.32337	3.5551e-86	3	3	8	2
P60843	P60843	Eukaryotic initiation factor 4A-I	Eif4a1	-0.452877	-0.990802	-0.688699	-1.15142		-0.214542	-0.436881	0.278698	0.455755	0	150	181	159	119
P60867	P60867	40S ribosomal protein S20	Rps20	-0.140682	-0.00724365	0.000360861	0.06589		-0.0608938	0.00259443	0.0040339	-0.00397283	1.2759e-169	12	16	12	16
P60904;G5E8T0;A2AUE1	P60904;G5E8T0;A2AUE1	DnaJ homolog subfamily C member 5	Dnajc5	0.241041	0.185428	1.85704	1.20403		0.126973	0.0886844	-0.736052	-0.433799	1.172e-13	1	2	7	3
P61021	P61021	Ras-related protein Rab-5B	Rab5b	2.77838	2.75953	3.12741	3.12404	Up	1.37573	1.23885	-1.24243	-1.15891	5.3279e-294	13	12	16	13
P61022;B0R091;B0R092	P61022;B0R091	Calcium-binding protein p22	Chp;1500003O03Rik	2.18022	2.19856	1.1813	1.20341		1.08134	0.988194	-0.466696	-0.433565	0	14	7	20	21
P61027	P61027	Ras-related protein Rab-10	Rab10	-0.0102185	0.00819002	-0.667754	-0.642391		0.00331442	0.00949053	0.27035	0.263515	0	32	26	33	34
P61028	P61028	Ras-related protein Rab-8B	Rab8b	0.533096	0.412844	-0.348272	-0.539173		0.270708	0.190299	0.143002	0.224534	1.0546e-58	2	2	5	2
P61079	P61079	Ubiquitin-conjugating enzyme E2 D3	Ube2d3	#VALUE!	-1.25476	-1.72125	-1.65389		NaN	-0.554824	0.690283	0.645517	7.309e-96	0	2	2	2
P61080;D3YUH6	P61080;D3YUH6	Ubiquitin-conjugating enzyme E2 D1	Ube2d1;Gm5959	0.345464	0.843492	0.920574	0.912535		0.178364	0.382723	-0.36277	-0.323714	1.1495e-58	2	2	2	2
P61082;F7CDT0;F6WMC0;G5E919;F6YXS3	P61082;F7CDT0;F6WMC0;G5E919	NEDD8-conjugating enzyme Ubc12	Ube2m	-0.814424	-0.631285	-0.609065	-0.692031		-0.392478	-0.276241	0.246955	0.282262	2.7292e-284	28	14	19	34
P61087;D3Z4U3;F8WIC2	P61087;D3Z4U3	Ubiquitin-conjugating enzyme E2 K	Ube2k	-1.59081	-1.94387	-1.63844	-1.48947		-0.774577	-0.862733	0.657274	0.583423	0	19	34	48	36
P61089	P61089	Ubiquitin-conjugating enzyme E2 N	Ube2n	0.239161	0.425272	0.592903	0.80087		0.126048	0.195852	-0.232159	-0.281544	0	24	35	30	40
P61161	P61161	Actin-related protein 2	Actr2	-0.184365	0.125671	0.120798	0.071909		-0.0823926	0.0619835	-0.0439731	-0.00624594	0	44	21	37	39
P61164	P61164	Alpha-centractin	Actr1a	-0.194532	0.0461367	0.082752	0.118617		-0.0873961	0.0264459	-0.0288079	-0.0238856	0	34	41	42	43
P61202-2;P61202;A2AQE4	P61202-2;P61202;A2AQE4	COP9 signalosome complex subunit 2	Cops2	-0.637991	-1.07843	-1.20163	-0.84384		-0.305646	-0.476037	0.483158	0.339594	1.7031e-255	24	30	50	26
P61211;F8WIB1;E9Q006	P61211;F8WIB1	ADP-ribosylation factor-like protein 1	Arl1	0.825404	0.842752	0.32539	0.331162		0.414569	0.382391	-0.125526	-0.104154	0	25	32	40	21
P61222	P61222	ATP-binding cassette sub-family E member 1	Abce1	-0.716533	-0.937828	-0.355148	-0.331578		-0.3443	-0.413211	0.145743	0.146134	0	89	67	93	84
P61226	P61226	Ras-related protein Rap-2b	Rap2b	3.01963	#VALUE!	3.9597	3.31207	Up	1.49447	NaN	-1.5742	-1.22992	1.6756e-39	5	0	4	4
P61255;B1ARA5;B1ARA3;K4DI68	P61255;B1ARA5;B1ARA3;K4DI68	60S ribosomal protein L26	Rpl26	-0.165155	-0.156277	-0.268738	-0.123365		-0.072938	-0.0639972	0.111298	0.067501	5.3591e-115	69	40	43	64
P61290;A2A4J1;A2A4J3	P61290;A2A4J1;A2A4J3	Proteasome activator complex subunit 3	Psme3	0.359161	0.19634	0.76797	0.869226		0.185105	0.0935602	-0.301942	-0.307359	0	38	23	39	17
P61327;Q9CQL1;G3UYI5;G3UZW7	P61327;Q9CQL1;G3UYI5;G3UZW7	Protein mago nashi homolog;Protein mago nashi homolog 1-related	Magoh;Magoh-rs1;Magohb	-1.23904	-0.91747	-0.893999	-0.864012		-0.601453	-0.404114	0.360533	0.347212	3.9313e-64	15	21	32	14
P61358;A2A4Q0;E9PV49	P61358;A2A4Q0	60S ribosomal protein L27	Rpl27	-0.0756667	-0.112129	0.0633821	0.140078		-0.0288961	-0.0442706	-0.0210869	-0.0319904	2.7187e-163	46	41	42	47
P61406;F6WT10	P61406	Telomerase-binding protein EST1A	Smg6	#VALUE!	-1.18425	-0.059772	-1.81715		NaN	-0.523318	0.0280033	0.707171	4.2338e-17	0	3	3	3
P61514	P61514	60S ribosomal protein L37a	Rpl37a	0.0943518	0.290574	-0.345319	-0.234382		0.054779	0.135666	0.141825	0.109427	5.4939e-83	8	22	8	27
Q9DB82;P61600;E9PXA4;E9PZX8;G5E8X4;E9Q023;E9PYH1	Q9DB82;P61600	N-alpha-acetyltransferase 20	Naa20	-0.754891	-1.09423	-1.27849	-1.11869		-0.363178	-0.483097	0.513794	0.443394	9.227e-39	7	8	10	6
P61620	P61620	Protein transport protein Sec61 subunit alpha isoform 1	Sec61a1	1.43391	1.2743	1.11012	1.15939		0.714048	0.575216	-0.438327	-0.416943	0	47	66	97	78
P61622	P61622	Integrin alpha-11	Itga11	5.42098	5.89056	6.83027	6.08937	Up	2.67629	2.63787	-2.71843	-2.27879	2.0098e-103	18	19	21	28
P61750;E9Q798;F6UFB9;E9Q2C2	P61750;E9Q798	ADP-ribosylation factor 4	Arf4	1.27058	1.6013	1.24563	1.27996		0.633664	0.721329	-0.492342	-0.462475	0	12	30	40	59
P61759;Q3TIR6	P61759;Q3TIR6	Prefoldin subunit 3	Vbp1	-0.776956	-0.751057	-0.782644	-0.739171		-0.374038	-0.329758	0.316146	0.300065	0	32	41	45	40
P61804	P61804	Dolichyl-diphosphooligosaccharide--protein glycosyltransferase subunit DAD1	Dad1	4.22846	1.82797	0.644109	1.19531		2.0894	0.822608	-0.25257	-0.430509	1.876e-43	1	14	2	14
P61922;P61922-2;F7C9G3	P61922;P61922-2	4-aminobutyrate aminotransferase, mitochondrial	Abat	5.35539	5.1978	10.9087	#VALUE!	Up	2.64402	2.32832	-4.34411	#VALUE!	2.6892e-16	4	5	3	0
P61924	P61924	Coatomer subunit zeta-1	Copz1	0.328577	0.406045	0.579579	0.459344		0.170053	0.187261	-0.226848	-0.152564	0	23	18	24	22
P61963	P61963	DDB1- and CUL4-associated factor 7	Dcaf7	0.397584	-0.363335	0.39878	1.97653		0.204016	-0.156515	-0.154779	-0.725542	7.2938e-10	3	1	3	1
P61965;F6Q3W0	P61965	WD repeat-containing protein 5	Wdr5	-1.21305	0.117929	-1.0585	-0.266471		-0.58866	0.0585243	0.426104	0.121546	6.0023e-37	7	4	14	7
P61967;D3YXN0;D3Z0D6;D3Z268;Q8BW87;Q9DB50;Q3TIV9;B1B0F6;Q7TN05	P61967;D3YXN0;D3Z0D6;D3Z268	AP-1 complex subunit sigma-1A	Ap1s1	0.65004	0.453337	0.0414864	-0.0789982		0.328262	0.208392	-0.0123591	0.0507454	0	4	6	17	3
P61979-2;P61979;H3BLL4;D3YWG1;H3BK96;H3BLP7;Q8BT23;H3BJ43	P61979-2;P61979;H3BLL4;D3YWG1;H3BK96	Heterogeneous nuclear ribonucleoprotein K	Hnrnpk;Gm7964	0.00320402	0.141715	-0.231692	-0.224809		0.00992034	0.0691523	0.0965318	0.105812	0	125	102	116	105
P61982	P61982	14-3-3 protein gamma;14-3-3 protein gamma, N-terminally processed	Ywhag	0.578426	0.485316	0.6364	0.819723		0.293017	0.222681	-0.249496	-0.288664	0	35	64	53	84
P62071	P62071	Ras-related protein R-Ras2	Rras2	3.2562	3.4114	3.48979	3.39222	Up	1.61089	1.53012	-1.38688	-1.26019	0	24	15	26	16
P62082;J3QJZ3;F6SVV1;J3QQ42	P62082;J3QJZ3;F6SVV1	40S ribosomal protein S7	Rps7;Gm9493	0.0821913	0.185125	0.170844	0.187435		0.0487942	0.0885487	-0.0639218	-0.0498751	0	61	62	81	87
P62137	P62137	Serine/threonine-protein phosphatase PP1-alpha catalytic subunit	Ppp1ca	0.39733	-0.323455	-0.230676	-0.121542		0.20389	-0.138696	0.0961269	0.0668125	0	72	82	61	79
P62141	P62141	Serine/threonine-protein phosphatase PP1-beta catalytic subunit	Ppp1cb	1.41832	1.219	0.674289	0.739881		0.706376	0.550507	-0.264599	-0.258511	0	22	15	19	20
P62192	P62192	26S protease regulatory subunit 4	Psmc1	-0.86531	-0.731558	-1.17252	-1.29358		-0.417521	-0.321045	0.471552	0.509442	0	66	67	75	49
P62196	P62196	26S protease regulatory subunit 8	Psmc5	0.111236	-0.599107	-0.332505	-0.658588		0.0630888	-0.261863	0.136716	0.269632	0	62	41	61	34
Q3UKW2;P62204;Q9D6P8;P20801;G3UX57	Q3UKW2;P62204;Q9D6P8	Calmodulin;Calmodulin-like protein 3	Calm1;Calml3	0.327012	0.445504	-0.0201534	0.0948445		0.169284	0.204892	0.012211	-0.0149077	0	30	48	64	40
P62242;Q5SZV3	P62242;Q5SZV3	40S ribosomal protein S8	Rps8;Gm11353	0.180559	0.0983369	0.0798361	0.182337		0.0972062	0.0497701	-0.0276455	-0.0479498	0	42	58	50	46
P62245;F8WJ41;D3YVB4;D3Z712	P62245;F8WJ41;D3YVB4	40S ribosomal protein S15a	Rps15a	0.098864	0.132468	-0.00901071	0.101528		0.0569996	0.0650208	0.00776948	-0.0174317	2.3146e-185	10	47	3	57
P62254;D6RES1	P62254	Ubiquitin-conjugating enzyme E2 G1	Ube2g1	-1.05728	-0.678272	-0.814193	-1.32032		-0.511999	-0.297236	0.328722	0.519542	1.671e-67	4	6	7	2
P62257;J3KMU3;E9Q3U1;D3Z2I4	P62257;J3KMU3;E9Q3U1;D3Z2I4	Ubiquitin-conjugating enzyme E2 H	Ube2h;Gm2058	-0.545131	-0.578154	0.30017	0.268002		-0.259945	-0.252501	-0.115472	-0.0803015	2.8782e-135	14	8	10	17
P62259;D6REF3;F6WA09	P62259;D6REF3	14-3-3 protein epsilon	Ywhae	0.134434	0.0429652	0.318212	0.517362		0.0745054	0.0250289	-0.122664	-0.174475	0	148	134	188	133
P62264;D3Z7I1;D3YVF4	P62264;D3Z7I1;D3YVF4	40S ribosomal protein S14	Rps14	-0.15429	-0.119896	-0.0262493	0.0931464		-0.067591	-0.047741	0.014641	-0.0142664	0	46	57	74	62
P62267	P62267	40S ribosomal protein S23	Rps23	-0.117929	-0.203024	0.0234978	0		-0.0496959	-0.0848845	-0.00518866	0.0209111	1.1132e-259	25	42	34	51
P62274;D3YYL7	P62274;D3YYL7	40S ribosomal protein S29	Rps29;Gm10126	-0.156565	0.723924	#VALUE!	-0.196661		-0.0687103	0.329296	#VALUE!	0.0951817	2.8861e-09	1	4	0	7
P62281	P62281	40S ribosomal protein S11	Rps11	-0.0488139	0.131851	0.0738274	0.0439273		-0.0156805	0.0647449	-0.0252504	0.0043216	2.313e-246	67	61	70	72
P62301	P62301	40S ribosomal protein S13	Rps13	-0.0752778	-0.0961871	0.14829	0.160992		-0.0287048	-0.0371475	-0.0549317	-0.0398888	0	50	50	52	61
P62315	P62315	Small nuclear ribonucleoprotein Sm D1	Snrpd1	-0.869346	-0.73632	-1.32884	-1.18415		-0.419507	-0.323173	0.533862	0.468114	1.9704e-222	10	19	18	17
P62317;D3Z5N9	P62317;D3Z5N9	Small nuclear ribonucleoprotein Sm D2	Snrpd2;Gm5449	-0.88495	-0.792962	-1.1597	-0.877201		-0.427188	-0.348482	0.466444	0.352194	0	26	26	23	21
P62320	P62320	Small nuclear ribonucleoprotein Sm D3	Snrpd3	-0.742249	-0.687889	-0.925992	-0.814748		-0.356957	-0.301533	0.373286	0.328607	2.8289e-202	10	10	8	9
P62331	P62331	ADP-ribosylation factor 6	Arf6	0.485079	0.34247	0.192321	0.242882		0.247077	0.158854	-0.0724828	-0.0708151	1.4408e-148	18	18	26	18
P62334	P62334	26S protease regulatory subunit 10B	Psmc6	-0.66244	-0.662087	-0.465342	-1.44511		-0.317678	-0.290004	0.189666	0.566669	0	67	44	75	42
P62340	P62340	TATA box-binding protein-like protein 1	Tbpl1	-1.93805	-2.15696	-1.27316	-2.02036		-0.945471	-0.957944	0.51167	0.783918	3.1242e-38	12	3	11	7
P62342	P62342	Selenoprotein T	Selt	1.59065	1.74943	0.901216	0.857188		0.791189	0.787516	-0.355055	-0.302813	4.1781e-31	3	3	13	3
P62488	P62488	DNA-directed RNA polymerase II subunit RPB7	Polr2g	0.210278	0.0350222	-0.830294	-0.312542		0.111833	0.0214797	0.33514	0.138945	4.2878e-27	10	2	11	2
P62492;E9Q6B3;E9PZB2	P62492	Ras-related protein Rab-11A	Rab11a	0.290024	#VALUE!	1.27719	1.38433		0.151079	NaN	-0.504919	-0.501892	3.7403e-174	1	0	4	2
P62500-2;H3BJV9;E9QLZ1;P62500;D3Z0V7;P62500-3;D3YW86;H3BLI9	P62500-2;H3BJV9		Tsc22d1	2.31001	0.103635	-2.55482	-1.9308		1.14522	0.0521377	1.02255	0.750092	4.2068e-37	5	1	10	2
P62702;D3Z2E6	P62702	40S ribosomal protein S4, X isoform	Rps4x	0.183572	0.0245075	0.184983	0.310564		0.098689	0.0167816	-0.0695579	-0.0963756	0	75	76	105	90
P62715	P62715	Serine/threonine-protein phosphatase 2A catalytic subunit beta isoform	Ppp2cb	0.694528	0.497191	0.511397	0.634508		0.350158	0.227987	-0.199669	-0.218716	0	4	4	4	4
P62717;F6YJW4	P62717	60S ribosomal protein L18a	Rpl18a	0.0113443	0.0789393	-0.10843	-0.0519798		0.0139266	0.0411028	0.0473989	0.0405417	0	82	51	60	70
P62737;P63268;D3YZY0;D3Z2K3	P62737;P63268;D3YZY0	Actin, aortic smooth muscle;Actin, gamma-enteric smooth muscle	Acta2;Actg2	#VALUE!	5.40255	5.74532	4.75205	Up	NaN	2.41981	-2.28595	-1.77374	0	0	6	7	5
P62746	P62746	Rho-related GTP-binding protein RhoB	Rhob	0.452792	0.0136381	-0.79802	3.51855		0.231187	0.0119249	0.322274	-1.30789	0	4	6	6	3
P62748;P84075;E9PV73;A2A7R5;Q91X97;D3YVA2;D3Z2Z8	P62748;P84075	Hippocalcin-like protein 1;Neuron-specific calcium-binding protein hippocalcin	Hpcal1;Hpca	-3.23296	-3.45039	-4.72509	-3.70928	Down	-1.58277	-1.53588	1.88764	1.42175	2.6716e-147	13	6	23	9
P62751;D3YWP3;D3Z1D6;D3YU45;D3YU46;D3YW68;D3YTY6	P62751;D3YWP3;D3Z1D6;D3YU45	60S ribosomal protein L23a	Rpl23a;Rpl23a-ps3;Gm10335;Gm3940	-0.339386	-0.317133	-0.0344805	-0.0981285		-0.158687	-0.135871	0.017922	0.0579701	0	60	47	53	89
P62754	P62754	40S ribosomal protein S6	Rps6	-0.402094	-0.444786	-0.0831248	-0.0808417		-0.189549	-0.192909	0.037312	0.0514416	0	48	59	74	63
P62806	P62806	Histone H4	Hist1h4a	-0.0459705	0.901901	-0.430583	-0.422655		-0.014281	0.408821	0.175812	0.18053	1.0956e-123	52	36	40	55
P62814;Q91YH6	P62814	V-type proton ATPase subunit B, brain isoform	Atp6v1b2	-0.374148	-0.342635	-0.172995	0.0549884		-0.175794	-0.147266	0.0731348	0.000144301	0	48	39	59	36
P62821	P62821	Ras-related protein Rab-1A	Rab1A	2.48043	2.56485	2.16525	1.99781		1.2291	1.15186	-0.858907	-0.733579	0	72	44	62	64
P62827	P62827	GTP-binding nuclear protein Ran	Ran	-0.938732	-1.03858	-1.14658	-1.00724		-0.453656	-0.458227	0.461214	0.401303	0	84	101	113	101
P62830;A2A6F8	P62830	60S ribosomal protein L23	Rpl23	-0.845759	-0.718353	-0.752283	-0.607544		-0.407899	-0.315145	0.304044	0.250355	0	28	40	49	37
P62835	P62835	Ras-related protein Rap-1A	Rap1a	2.57832	2.93329	3.20267	2.55168	Up	1.27727	1.31649	-1.27244	-0.942751	0	2	2	4	2
P62838;Q6ZWY6	P62838	Ubiquitin-conjugating enzyme E2 D2	Ube2d2	-1.15538	-1.52121	-1.15262	-1.10631		-0.560281	-0.673877	0.463622	0.438719	5.1393e-96	2	11	8	12
P62843;D3YTQ9	P62843;D3YTQ9	40S ribosomal protein S15	Rps15	0.0991458	0.00208954	0.177053	0.174249		0.0571383	0.0067647	-0.0663972	-0.0448955	0	53	54	74	57
P62849;P62849-3;P62849-2	P62849;P62849-3;P62849-2	40S ribosomal protein S24	Rps24	0.0768021	0.0442342	-0.0269661	0.0862849		0.0461418	0.0255958	0.0149266	-0.0116751	1.9484e-171	33	33	39	30
P62852	P62852	40S ribosomal protein S25	Rps25	0.266167	0.282041	0.144945	0.163663		0.139339	0.131853	-0.0535985	-0.0408975	2.9679e-194	23	30	25	35
P62855	P62855	40S ribosomal protein S26	Rps26	-0.134177	0.0391547	-0.16783	0.0378379		-0.057692	0.0233263	0.0710762	0.00662128	4.0036e-139	13	23	21	26
Q642K5;P62862	Q642K5;P62862	40S ribosomal protein S30	Fau	-0.289069	-0.179243	-0.243857	-0.173345		-0.133923	-0.0742588	0.101381	0.0863762	1.7519e-13	3	14	6	15
P62869	P62869	Transcription elongation factor B polypeptide 2	Tceb2	0.0295782	0.0770557	-0.279442	-0.205235		0.0229004	0.0402613	0.115566	0.0984196	2.29e-146	28	36	24	35
P62874;H3BKR2;H3BLF7	P62874;H3BKR2	Guanine nucleotide-binding protein G(I)/G(S)/G(T) subunit beta-1	Gnb1	2.0658	1.47102	2.06095	2.17362		1.02503	0.663117	-0.817333	-0.799973	0	49	33	35	41
E9QKR0;P62880;D3YZX3;D3Z1M1;D3Z1T4;E9PWM7	E9QKR0;P62880;D3YZX3;D3Z1M1;D3Z1T4	Guanine nucleotide-binding protein G(I)/G(S)/G(T) subunit beta-2	Gnb2	1.92187	1.35963	2.36059	2.25136		0.954196	0.613343	-0.936773	-0.829331	0	29	26	21	25
P62889	P62889	60S ribosomal protein L30	Rpl30	-0.0350956	-0.00466624	-0.31038	-0.126645		-0.00892897	0.00374607	0.127897	0.0687396	0	30	31	21	33
P62892	P62892	60S ribosomal protein L39	Rpl39	-0.974274	-0.722093	-0.31832	-0.279441		-0.471149	-0.316816	0.131063	0.126444	5.5925e-07	1	9	5	11
P62900;D3YVU2;D3YWP7	P62900;D3YVU2	60S ribosomal protein L31	Rpl31;Gm16382	-0.212871	-0.286591	-0.207577	-0.148799		-0.0964218	-0.122224	0.0869197	0.0771063	0	18	24	25	26
P62908;D3YV43	P62908;D3YV43	40S ribosomal protein S3	Rps3	0.306084	0.194221	0.219596	0.367716		0.158983	0.0926134	-0.0833552	-0.11796	0	88	92	106	118
P62911;A2AD25;P17932;F6WJV0	P62911	60S ribosomal protein L32	Rpl32	0.085024	-0.193142	-0.0391244	0.0538429		0.0501883	-0.0804692	0.0197731	0.000576859	0	60	47	74	42
P62915	P62915	Transcription initiation factor IIB	Gtf2b	-1.0431	#VALUE!	-1.39816	-1.46825		-0.505021	NaN	0.561497	0.575409	4.9186e-22	2	0	4	2
P62918	P62918	60S ribosomal protein L8	Rpl8	-0.0864229	-0.0608327	-0.135298	0.0553705		-0.0341898	-0.0213504	0.0581087	0	0	83	72	112	63
P62960;A2BGG7	P62960;A2BGG7	Nuclease-sensitive element-binding protein 1	Ybx1	-0.795515	-0.663705	0.0817181	-0.00188213		-0.383172	-0.290727	-0.0283958	0.0216219	0	39	48	45	41
P62962;Q5SX49;J3QMC2	P62962;Q5SX49	Profilin-1;Profilin	Pfn1	-0.514785	-0.599301	-0.467562	-0.503368		-0.24501	-0.26195	0.190552	0.211012	0	10	99	4	173
P62965	P62965	Cellular retinoic acid-binding protein 1	Crabp1	-9.91848	-11.2824	-1.90471	-12.7702	Down	-4.87307	-5.03538	0.763412	4.84368	1.3432e-261	17	23	2	19
P62983	P62983	Ubiquitin-40S ribosomal protein S27a;Ubiquitin;40S ribosomal protein S27a	Rps27a	-0.602518	-0.664614	-1.67975	-1.66292		-0.288188	-0.291133	0.673737	0.648926	0	83	88	104	99
P62996;F8WJG3;P62996-2	P62996;F8WJG3	Transformer-2 protein homolog beta	Tra2b	-1.52937	-0.651564	-0.425453	0.0692624		-0.744342	-0.285302	0.173767	-0.00524641	4.8987e-78	5	5	6	4
P63001;Q3TLP8;P60764;A2AC13;Q05144;Q9ER71;Q9ER71-2;D3YX61;F2Z463;D3Z3L1;G3UZM2	P63001;Q3TLP8;P60764;A2AC13	Ras-related C3 botulinum toxin substrate 1;Ras-related C3 botulinum toxin substrate 3	Rac1;Rac3	0.49765	0.458643	0.827941	0.785393		0.253263	0.210763	-0.325847	-0.275699	0	39	47	49	35
P63002;P63002-2	P63002;P63002-2	Amino-terminal enhancer of split	Aes	0.482114	#VALUE!	0.929146	1.08035		0.245617	NaN	-0.366188	-0.387091	2.5088e-28	4	0	5	7
P63005;P63005-2;Q5SW16	P63005;P63005-2	Platelet-activating factor acetylhydrolase IB subunit alpha	Pafah1b1	0.466247	-0.00144727	0.210214	0.0783219		0.237808	0.00518438	-0.0796153	-0.0086678	1.0245e-223	27	24	39	24
P63011;D3YZP5	P63011	Ras-related protein Rab-3A	Rab3a	2.15098	-0.386957	1.47206	4.24628		1.06695	-0.16707	-0.582598	-1.58273	9.7463e-89	4	2	8	1
P63017;Q504P4;D3Z5E2;D3YW43	P63017;Q504P4	Heat shock cognate 71 kDa protein	Hspa8	-0.234039	-0.552981	-0.891743	-0.860707		-0.10684	-0.241253	0.359634	0.345964	0	346	401	349	430
P63024;D3YTU0;Q62442;Q62442-2	P63024	Vesicle-associated membrane protein 3	Vamp3	2.68508	2.97823	1.64855	1.96946		1.32981	1.33657	-0.652947	-0.722872	0	1	9	2	18
P63028;D3YU75	P63028;D3YU75	Translationally-controlled tumor protein	Tpt1	-1.26867	-1.22319	-0.992168	-1.06209		-0.616039	-0.540715	0.399663	0.422018	0	69	40	75	66
P63037;B1AXY1;B1AXY0;B1AXX9	P63037;B1AXY1	DnaJ homolog subfamily A member 1	Dnaja1	0.0719713	-0.3231	-0.438905	-0.391516		0.0437644	-0.138537	0.179129	0.16877	0	40	46	56	43
P63038;P63038-2;D3Z2F2;D3Z7J9	P63038	60 kDa heat shock protein, mitochondrial	Hspd1	0.26803	0.168685	0.38298	0.0588098		0.140255	0.0812032	-0.148481	-0.00129892	0	342	442	488	488
P63073	P63073	Eukaryotic translation initiation factor 4E	Eif4e	-0.593476	-0.698291	-0.0979077	0.0593452		-0.283738	-0.306181	0.0432046	-0.00150114	2.2698e-280	27	21	28	30
P63085;F6VEI7	P63085	Mitogen-activated protein kinase 1	Mapk1	-1.11849	-0.941572	-1.21456	-0.724873		-0.542122	-0.414884	0.488309	0.294665	0	54	36	62	45
P63087-2;P63087	P63087-2;P63087	Serine/threonine-protein phosphatase PP1-gamma catalytic subunit	Ppp1cc	1.07568	0.352288	0.639112	0.666426		0.537743	0.163241	-0.250577	-0.23077	0	7	4	6	8
Q6R0H7;P63094;Q6R0H7-4;P63094-2;P63094-3;Q66L47;Q8CGK7;A2A610	Q6R0H7;P63094;Q6R0H7-4;P63094-2;P63094-3	Guanine nucleotide-binding protein G(s) subunit alpha isoforms XLas;Guanine nucleotide-binding protein G(s) subunit alpha isoforms short	Gnas	1.80724	0.684362	2.30259	1.67565		0.897783	0.311619	-0.913651	-0.61191	1.4614e-263	17	20	25	11
P63101;D3YXN6;D3YXF4;D3YW45	P63101	14-3-3 protein zeta/delta	Ywhaz	-1.59116	-1.70487	-1.33907	-1.44305		-0.77475	-0.755941	0.537942	0.565889	0	125	107	151	130
P63147	P63147	Ubiquitin-conjugating enzyme E2 B	Ube2b	#VALUE!	-2.68592	-2.92438	-2.90856	Down	NaN	-1.19429	1.16986	1.11936	8.5063e-13	0	2	2	2
P63158;D3YZ18;D3YVC6	P63158;D3YZ18	High mobility group protein B1	Hmgb1	-0.736547	-1.16796	-0.802069	-0.743204		-0.354151	-0.516037	0.323889	0.301588	0	84	75	90	99
P63166	P63166	Small ubiquitin-related modifier 1	Sumo1	0.539407	0.40122	-0.350565	-0.527056		0.273814	0.185105	0.143916	0.219958	9.0966e-44	3	3	4	4
P63242;J3QPS8;Q8BGY2	P63242;J3QPS8	Eukaryotic translation initiation factor 5A-1	Eif5a	-0.604523	-0.636097	-0.495994	-0.542115		-0.289175	-0.278391	0.201885	0.225645	0	75	78	95	136
P63260;B1ATY1;G3UYG0	P63260	Actin, cytoplasmic 2;Actin, cytoplasmic 2, N-terminally processed	Actg1	1.58404	1.6526	1.39187	1.21281		0.787934	0.744247	-0.550634	-0.437115	0	490	875	672	823
P63276	P63276	40S ribosomal protein S17	Rps17	0.209736	0.0531035	0.0901068	0.101025		0.111566	0.0295589	-0.0317396	-0.0172419	0	31	72	88	78
P63280;G3UYP0;Q8CFZ0;G3UZL6;G3UWJ1;G3UWL6	P63280;G3UYP0;Q8CFZ0	SUMO-conjugating enzyme UBC9	Ube2i	-0.892844	-0.719559	-0.638831	-0.615565		-0.431073	-0.315684	0.25882	0.253384	0	28	22	33	21
P63321	P63321	Ras-related protein Ral-A	Rala	2.8498	2.35441	1.43126	0.739015		1.41088	1.05783	-0.566335	-0.258184	1.5553e-101	7	10	9	4
P63325;J3QNI7;Q3UW83	P63325;J3QNI7;Q3UW83	40S ribosomal protein S10	Rps10	-0.51868	-0.255536	0.0891081	0.0317592		-0.246926	-0.108348	-0.0313415	0.00891703	3.093e-291	43	44	69	56
P63328-2;P63328;E9Q6P2;P48455	P63328-2;P63328	Serine/threonine-protein phosphatase 2B catalytic subunit alpha isoform	Ppp3ca	0.486562	0.142022	0.912809	0.926471		0.247806	0.0692898	-0.359675	-0.328978	9.3222e-109	26	13	32	14
P63330	P63330	Serine/threonine-protein phosphatase 2A catalytic subunit alpha isoform	Ppp2ca	-0.84541	-0.926326	-0.795702	-0.984902		-0.407727	-0.408072	0.321351	0.392867	0	46	35	65	35
P67778;Q5SQG5	P67778;Q5SQG5	Prohibitin	Phb	-0.0116814	-0.0337481	-2.4314	-2.19068		0.00259443	-0.00924837	0.973354	0.848237	0	44	52	88	61
P67871;G3UXG7;G3UZX4;G3UWL3;G3UZA4;G3UWU5	P67871;G3UXG7;G3UZX4;G3UWL3;G3UZA4	Casein kinase II subunit beta	Csnk2b	-1.13569	-1.17105	-1.29997	-1.296		-0.550592	-0.51742	0.522357	0.510354	0	24	21	26	20
P67984	P67984	60S ribosomal protein L22	Rpl22	0.138884	0.0961526	0.031243	0.212111		0.0766959	0.0487942	-0.00827593	-0.0591943	0	11	28	27	33
P68033;P68134	P68033;P68134	Actin, alpha cardiac muscle 1;Actin, alpha skeletal muscle	Actc1;Acta1	3.8129	3.91261	4.32929	3.78162	Up	1.88487	1.75408	-1.72152	-1.40725	0	82	80	141	74
P68037;D3YZS3	P68037	Ubiquitin-conjugating enzyme E2 L3	Ube2l3	-1.10856	-1.60269	-1.31205	-1.23653		-0.537236	-0.710284	0.52717	0.487898	0	22	46	30	31
P68040	P68040	Guanine nucleotide-binding protein subunit beta-2-like 1	Gnb2l1	-0.0397893	-0.0964854	-0.104926	-0.342265		-0.011239	-0.0372807	0.0460021	0.15017	0	102	87	129	77
P68181;P68181-4;P68181-2	P68181;P68181-4;P68181-2	cAMP-dependent protein kinase catalytic subunit beta	Prkacb	-0.0736635	0.649576	1.26145	1.31672		-0.0279102	0.296076	-0.498648	-0.476358	1.5903e-270	6	3	11	2
P68368	P68368	Tubulin alpha-4A chain	Tuba4a	-0.796013	-1.38479	-2.10503	-1.33256		-0.383417	-0.612924	0.84326	0.524164	0	10	30	5	10
P68369;P05214	P68369;P05214	Tubulin alpha-1A chain;Tubulin alpha-3 chain	Tuba1a;Tuba3a	1.71665	1.46572	1.1853	1.23287		0.853197	0.660746	-0.468292	-0.444694	0	25	157	36	112
P68372;J3QNR5	P68372;J3QNR5	Tubulin beta-4B chain	Tubb4b	0.130255	-0.0445876	0.162605	0.0203862		0.0724488	-0.0140916	-0.0606381	0.0132121	0	328	456	300	316
P68373;Q9JJZ2	P68373	Tubulin alpha-1C chain	Tuba1c	0.647236	0.933846	0.695001	0.435217		0.326882	0.423094	-0.272855	-0.143452	0	19	33	14	17
P68433;F8WI35;E0CYR7;E0CYN1	P68433;F8WI35	Histone H3.1;Histone H3	Hist1h3a;H3f3a	1.23044	2.04608	-0.137731	-0.406439		0.613909	0.920065	0.0590783	0.174406	6.0426e-110	14	17	28	13
P68510	P68510	14-3-3 protein eta	Ywhah	0.14832	0.103635	-0.173682	-0.151333		0.0813396	0.0521377	0.0734089	0.0780633	0	81	82	98	83
P70122;F6TN03;D6REV5	P70122;F6TN03	Ribosome maturation protein SBDS	Sbds	-1.03181	-1.26298	-1.23334	-1.0234		-0.499463	-0.558495	0.495797	0.407407	0	34	28	40	30
P70168	P70168	Importin subunit beta-1	Kpnb1	0.206751	0.210833	0.253344	0.272162		0.110096	0.100036	-0.0968075	-0.0818733	0	228	209	248	205
P70188;P70188-2	P70188;P70188-2	Kinesin-associated protein 3	Kifap3	-2.49908	-1.35231	-1.60478	-1.54214		-1.22159	-0.598413	0.643856	0.603312	7.9285e-38	1	3	4	1
P70195	P70195	Proteasome subunit beta type-7	Psmb7	-0.283574	-0.407722	-0.220503	-0.190935		-0.131218	-0.176348	0.092072	0.0930192	0	37	35	41	32
P70202	P70202	Latexin	Lxn	1.0091	1.29094	-1.0165	-0.830836		0.504976	0.582652	0.409364	0.334683	0	14	14	20	10
P70206;P70208;P70208-2	P70206	Plexin-A1	Plxna1	1.94793	2.29288	2.23745	2.07241		0.967021	1.03034	-0.887687	-0.761751	4.4544e-52	17	12	18	17
P70227	P70227	Inositol 1,4,5-trisphosphate receptor type 3	Itpr3	0.045404	-0.0229452	-1.27697	-1.20013		0.0306892	-0.00442139	0.513187	0.47415	1.1396e-291	44	51	58	55
P70245;A2AC29	P70245;A2AC29	3-beta-hydroxysteroid-Delta(8),Delta(7)-isomerase	Ebp	2.96217	2.6428	1.65909	1.66894		1.46618	1.18669	-0.657149	-0.609376	3.0454e-93	7	4	8	5
P70268;P70268-2;D6RH37;Q8K045	P70268;P70268-2;D6RH37	Serine/threonine-protein kinase N1	Pkn1	-1.22192	-0.71061	0.676855	0.226146		-0.593028	-0.311685	-0.265622	-0.0644949	2.2001e-11	2	1	3	2
P70279;A2ALA0	P70279	Surfeit locus protein 6	Surf6	-0.397084	1.18242	-0.832304	0.416991		-0.187083	0.534161	0.335941	-0.136569	6.5662e-07	3	3	2	5
P70280	P70280	Vesicle-associated membrane protein 7	Vamp7	0.632005	0.704849	0.621671	0.537505		0.319387	0.320773	-0.243626	-0.182082	9.3077e-102	8	8	23	16
P70288;Q8BQ10	P70288;Q8BQ10	Histone deacetylase 2	Hdac2	-0.193349	-0.835377	-1.07757	-0.800118		-0.0868137	-0.367434	0.433707	0.323082	2.7822e-290	5	2	5	4
Q3U3K9;P70295	Q3U3K9;P70295	Ancient ubiquitous protein 1	Aup1	-1.64603	-0.752315	-0.0344805	-0.255217		-0.801757	-0.33032	0.017922	0.117296	1.1205e-17	1	1	6	5
P70296;D3Z1V4;D6RHS6	P70296;D3Z1V4;D6RHS6	Phosphatidylethanolamine-binding protein 1;Hippocampal cholinergic neurostimulating peptide	Pebp1	-1.11473	-1.05378	-0.78584	-0.659539		-0.540275	-0.465022	0.31742	0.269991	0	39	40	34	57
P70297;Q3UGN9;A2ARJ0	P70297;Q3UGN9	Signal transducing adapter molecule 1	Stam	-1.32346	-0.937828	-0.0572864	-0.139372		-0.643	-0.413211	0.0270125	0.073546	1.9802e-88	6	6	13	1
P70303;P70303-2;P70303-3	P70303;P70303-2;P70303-3	CTP synthase 2	Ctps2	2.94823	3.69588	4.68601	3.66911	Up	1.45933	1.65723	-1.8637	-1.36476	6.6892e-79	9	2	7	4
P70318;Q921W2;Q80ZW7;G5E8L2;Q8CII5;D6RGU1;D3Z3Y4	P70318;Q921W2	Nucleolysin TIAR	Tial1	-0.624544	-0.988617	-0.305739	-2.26257		-0.299028	-0.435905	0.126048	0.875387	8.953e-21	4	1	4	1
P70333;J3QPH6	P70333	Heterogeneous nuclear ribonucleoprotein H2	Hnrnph2	0.3674	#VALUE!	0.283349	-0.265417		0.18916	NaN	-0.108767	0.121148	0	9	0	6	1
P70335;P70335-2	P70335;P70335-2	Rho-associated protein kinase 1	Rock1	0.0301549	0.79685	0.574627	0.305218		0.0231843	0.361881	-0.224874	-0.0943564	0	3	11	17	15
P70336-2;P70336;F8VPK5	P70336-2;P70336;F8VPK5	Rho-associated protein kinase 2	Rock2	-0.142457	-0.118795	-0.145713	-0.458552		-0.0617669	-0.047249	0.06226	0.194087	0	49	58	64	59
P70340;Q8C3Y6;Q8CC31	P70340;Q8C3Y6	Mothers against decapentaplegic homolog 1	Smad1	0.00669574	1.42854	1.65293	#VALUE!		0.0116388	0.644133	-0.654694	#VALUE!	1.5672e-20	1	1	2	0
P70349;B0R1E3	P70349	Histidine triad nucleotide-binding protein 1	Hint1	-2.76166	-2.53381	#VALUE!	-2.67771	Down	-1.35082	-1.12633	#VALUE!	1.03217	9.7228e-186	3	32	0	50
P70362;E9Q0Y6;E9Q646;E9Q475;F6SYJ2	P70362	Ubiquitin fusion degradation protein 1 homolog	Ufd1l	0.383297	0.424144	0.70389	0.427421		0.196985	0.195348	-0.276398	-0.140507	1.906e-83	10	2	11	4
P70372	P70372	ELAV-like protein 1	Elavl1	-0.11323	-0.65822	0.118149	0.0674226		-0.0473832	-0.288276	-0.0429174	-0.00455156	0	32	18	27	13
P70388;Q5SV02;P70388-2;A8Y5I3;E9PUJ2;P70388-4;P70388-3	P70388;Q5SV02;P70388-2;A8Y5I3;E9PUJ2	DNA repair protein RAD50	Rad50	-1.35202	-1.70225	-2.07464	-1.99588		-0.657058	-0.754772	0.831147	0.774671	1.2011e-270	17	30	42	16
P70398;Q4FE56;E9PWA9;G3UZS3	P70398;Q4FE56	Probable ubiquitin carboxyl-terminal hydrolase FAF-X;Ubiquitin carboxyl-terminal hydrolase	Usp9x	-0.633177	-0.413823	-0.42898	-0.573349		-0.303276	-0.179074	0.175173	0.237441	0	157	150	145	168
P70404	P70404	Isocitrate dehydrogenase [NAD] subunit gamma 1, mitochondrial	Idh3g	1.48458	1.3499	2.17083	2.44673		0.738984	0.608998	-0.861133	-0.903117	2.5912e-176	29	12	29	12
P70444;D3Z463	P70444	BH3-interacting domain death agonist;BH3-interacting domain death agonist p15;BH3-interacting domain death agonist p13;BH3-interacting domain death agonist p11	Bid	-4.10876	-0.630737	-3.61006	-3.42074	Down	-2.0138	-0.275996	1.44318	1.31278	7.09e-39	2	7	16	9
P70445	P70445	Eukaryotic translation initiation factor 4E-binding protein 2	Eif4ebp2	0.932082	0.704592	1.13616	0.987904		0.467071	0.320658	-0.448706	-0.352179	1.2392e-14	1	2	2	2
P70451;P70451-5;P70451-2;P70451-3;P70451-4	P70451;P70451-5;P70451-2;P70451-3	Tyrosine-protein kinase Fer	Fer	0.709438	0.45306	0.89451	0.36958		0.357496	0.208268	-0.352381	-0.118664	3.9073e-58	3	2	10	5
P70452;D6RJ29	P70452	Syntaxin-4	Stx4	1.34243	1.33463	2.00023	1.78996		0.669027	0.602172	-0.793132	-0.655081	3.6645e-95	7	4	12	7
P70460	P70460	Vasodilator-stimulated phosphoprotein	Vasp	-0.498158	-1.51632	-0.91592	-0.203807		-0.236826	-0.671692	0.369271	0.0978804	4.3056e-140	18	33	23	18
P70670;Q60817	P70670;Q60817	Nascent polypeptide-associated complex subunit alpha, muscle-specific form;Nascent polypeptide-associated complex subunit alpha	Naca	-0.0163667	-0.231159	-0.406151	-0.457552		0.000288558	-0.0974556	0.166073	0.193709	0	28	27	41	25
P70677	P70677	Caspase-3;Caspase-3 subunit p17;Caspase-3 subunit p12	Casp3	-3.3693	-3.47038	-3.64373	-3.74842	Down	-1.64986	-1.54481	1.4566	1.43654	3.9461e-242	27	16	27	16
P70697	P70697	Uroporphyrinogen decarboxylase	Urod	-2.42364	-2.30835	-2.62712	-2.41683		-1.18446	-1.02559	1.05137	0.933648	8.3358e-163	11	8	13	7
P70698	P70698	CTP synthase 1	Ctps	-0.197617	-0.273615	-0.0880592	-0.208444		-0.0889144	-0.116426	0.0392789	0.0996318	0	81	63	78	69
P70699;F6R5R5;A2AFL5;A2AFL3;F6VEG4	P70699	Lysosomal alpha-glucosidase	Gaa	-1.61928	-1.26079	-0.223897	-0.163618		-0.788589	-0.557518	0.093425	0.0827026	0	50	36	62	66
P70700;A2AP84	P70700;A2AP84	DNA-directed RNA polymerase I subunit RPA2	Polr1b	-2.32692	-0.369673	-1.09015	-1.47747		-1.13685	-0.159347	0.438719	0.57889	1.028e-10	2	3	3	2
P80313	P80313	T-complex protein 1 subunit eta	Cct7	0.0376456	0.00594391	0.093031	0.109579		0.0268709	0.00848693	-0.0329052	-0.0204722	0	120	146	195	141
P80314	P80314	T-complex protein 1 subunit beta	Cct2	0.179189	0.176915	0.147049	0.235626		0.0965318	0.0848807	-0.0544372	-0.068075	0	207	119	147	152
P80315;G5E839;G3UYW5;G3UXG2;G3UXF3	P80315;G5E839	T-complex protein 1 subunit delta	Cct4	0.114041	0.102701	0.177546	0.268648		0.064469	0.0517201	-0.0665934	-0.0805454	0	134	99	131	114
P80316;E0CZA1	P80316	T-complex protein 1 subunit epsilon	Cct5	-0.0248197	-0.118561	0.131747	0.167437		-0.00387162	-0.0471446	-0.0483375	-0.042323	0	141	102	183	108
P80317;E9QPA6	P80317;E9QPA6	T-complex protein 1 subunit zeta	Cct6a	0.0408089	0.0296096	-0.0255326	0.068956		0.0284277	0.0190613	0.0143553	-0.00513074	0	131	121	132	141
P80318;E9Q133;Q3U0I3;F6Q609;F6ZVG8	P80318;E9Q133;Q3U0I3;F6Q609	T-complex protein 1 subunit gamma	Cct3	-0.063758	-0.157999	0.163926	0.123553		-0.0230352	-0.0647666	-0.0611647	-0.0257497	0	168	82	177	96
P81117	P81117	Nucleobindin-2	Nucb2	3.9147	3.8454	4.09924	4.09969	Up	1.93497	1.72404	-1.62981	-1.52737	6.2382e-30	5	8	7	5
P81122	P81122	Insulin receptor substrate 2	Irs2	-3.1773	-4.35986	-2.68878	-1.78755	Down	-1.55538	-1.94225	1.07594	0.695994	1.0762e-53	3	6	3	8
P82343;P82343-2;D6RHA2;G3XA46	P82343;P82343-2;D6RHA2	N-acylglucosamine 2-epimerase	Renbp	0.564516	0.266977	3.65023	2.95633		0.286171	0.125122	-1.45083	-1.09557	2.1482e-100	5	9	14	7
P83741-2;P83741-3;P83741;P83741-5;P83741-4;P83741-6;F7CZC4;F7CC62;E9PZ38;F6U2S8;E9Q470;F6TAR7	P83741-2;P83741-3;P83741;P83741-5;P83741-4	Serine/threonine-protein kinase WNK1	Wnk1	-3.00246	-2.82611	-1.38588	-3.26412	Down	-1.46933	-1.25694	0.556601	1.25363	2.3073e-100	8	4	12	10
P83882	P83882	60S ribosomal protein L36a	Rpl36a	-0.691372	-0.750937	-0.542578	-0.764221		-0.331917	-0.329703	0.220454	0.309525	3.291e-58	27	30	27	35
P83887;Q8VCK3	P83887;Q8VCK3	Tubulin gamma-1 chain;Tubulin gamma-2 chain	Tubg1;Tubg2	0.830018	0.433437	1.01191	1.16715		0.41684	0.1995	-0.399178	-0.419874	9.7317e-74	7	8	7	8
P84078;P61205	P84078;P61205	ADP-ribosylation factor 1;ADP-ribosylation factor 3	Arf1;Arf3	-0.118567	-0.0358935	-0.522017	-0.453206		-0.0500095	-0.010207	0.212258	0.192068	0	56	61	73	76
P84084;D3YV25	P84084	ADP-ribosylation factor 5	Arf5	0.104775	0.161046	0.277187	0.396094		0.059909	0.0777899	-0.106312	-0.128677	0	18	18	23	17
G3UW85;P84089	G3UW85;P84089	Enhancer of rudimentary homolog	Erh	-0.284088	0.73393	#VALUE!	-0.822646		-0.131471	0.333767	#VALUE!	0.331591	2.5814e-138	1	5	0	11
P84091;Q3TWV4	P84091;Q3TWV4	AP-2 complex subunit mu	Ap2m1	0.782425	1.07635	0.940174	0.903842		0.393416	0.486766	-0.370583	-0.320432	9.2347e-220	35	49	34	24
P84096	P84096	Rho-related GTP-binding protein RhoG	Rhog	0.654238	0.864966	0.328591	0.301304		0.330329	0.392317	-0.126801	-0.0928786	0	24	25	43	26
P84104;P84104-2;A2A4X6	P84104;P84104-2;A2A4X6	Serine/arginine-rich splicing factor 3	Srsf3;Gm12355	-0.190206	-0.0234637	0.156797	0.303666		-0.0852671	-0.004653	-0.0583228	-0.0937712	3.0963e-119	34	42	41	36
P84228	P84228	Histone H3.2	Hist1h3b	0.643493	1.87761	-0.0505303	-0.165421		0.325041	0.844787	0.0243196	0.0833836	2.5374e-98	36	26	18	21
P85094	P85094	Isochorismatase domain-containing protein 2A, mitochondrial	Isoc2a	3.56082	3.76754	5.08324	5.00434	Up	1.76082	1.68925	-2.02204	-1.86902	0	9	23	28	23
P97287;D2K6L9	P97287;D2K6L9	Induced myeloid leukemia cell differentiation protein Mcl-1 homolog	Mcl1	-0.104791	0.0717133	2.53946	2.69183		-0.0432296	0.0378742	-1.00807	-0.995678	2.8157e-63	3	3	7	5
P97298;B7ZC25;Q5ND37;E9PWS2;F6S1M4;CON__Q95121	P97298;B7ZC25	Pigment epithelium-derived factor	Serpinf1	3.81741	3.23021	1.93584	1.4013		1.8871	1.44917	-0.767462	-0.508301	2.7889e-103	7	6	14	9
P97300;P97300-1;P97300-3;H3BIX4;H3BKA7;P97300-4	P97300;P97300-1;P97300-3;H3BIX4	Neuroplastin	Nptn	2.75321	2.78527	2.81472	2.89752	Up	1.36334	1.25036	-1.11779	-1.07336	1.0028e-34	6	3	8	4
P97304	P97304	DNA-directed RNA polymerases I and III subunit RPAC2	Polr1d	-0.0776112	0.602956	-0.434427	-0.257682		-0.0298531	0.275245	0.177344	0.118227	1.4343e-09	3	4	4	4
P97310	P97310	DNA replication licensing factor MCM2	Mcm2	-0.765164	-0.669477	-0.72137	-0.729229		-0.368234	-0.293306	0.291721	0.296311	0	117	66	82	66
P97311	P97311	DNA replication licensing factor MCM6	Mcm6	-0.788413	-0.738301	-0.837748	-0.777759		-0.379676	-0.324058	0.338111	0.314639	0	104	59	94	63
P97313;P97313-2	P97313	DNA-dependent protein kinase catalytic subunit	Prkdc	0.118523	-0.600308	-0.756969	-0.757124		0.0666747	-0.2624	0.305912	0.306846	1.9511e-33	9	3	14	5
P97314	P97314	Cysteine and glycine-rich protein 2	Csrp2	6.53205	6.83585	6.34149	6.27999	Up	3.22311	3.06024	-2.52359	-2.35078	0	40	39	56	53
P97315	P97315	Cysteine and glycine-rich protein 1	Csrp1	2.71479	2.89628	2.71196	2.80304	Up	1.34443	1.29995	-1.07683	-1.03768	4.4173e-218	29	25	42	27
P97346;P97346-2	P97346;P97346-2	Nucleoredoxin	Nxn	-0.517811	-0.514587	0.142054	0.191193		-0.246498	-0.224098	-0.0524462	-0.0512944	2.0184e-66	17	23	18	15
P97360;E9Q8J8	P97360;E9Q8J8	Transcription factor ETV6	Etv6	-1.45705	#VALUE!	-1.73982	-1.88211		-0.70875	NaN	0.697685	0.731705	2.0756e-20	1	0	3	1
P97363	P97363	Serine palmitoyltransferase 2	Sptlc2	-0.719624	-0.762765	-1.18528	-0.943068		-0.345821	-0.334989	0.476641	0.377068	7.9133e-138	8	7	18	7
P97370	P97370	Sodium/potassium-transporting ATPase subunit beta-3	Atp1b3	1.86904	1.7318	2.28361	1.44925		0.9282	0.779638	-0.906088	-0.52641	7.3688e-58	17	16	21	14
P97372;G3X9V0;E0CZ90	P97372;G3X9V0;E0CZ90	Proteasome activator complex subunit 2	Psme2	-2.77162	-2.62778	-2.93032	-2.89818	Down	-1.35572	-1.16832	1.17223	1.11543	0	36	37	51	63
P97376	P97376	Protein FRG1	Frg1	-1.51326	-0.927998	-1.60733	-1.77053		-0.736413	-0.408819	0.644871	0.689568	1.003e-32	4	4	10	1
P97377;P97377-2;Q80YP0;Q80YP0-2	P97377;P97377-2	Cyclin-dependent kinase 2	Cdk2	0.531396	0.873075	0.915782	0.911626		0.269871	0.39594	-0.36086	-0.323371	2.1835e-69	17	7	19	7
P97379-2;P97379	P97379-2;P97379	Ras GTPase-activating protein-binding protein 2	G3bp2	-0.385061	-0.286873	-0.0409091	-0.124459		-0.181166	-0.12235	0.0204844	0.067914	5.424e-206	16	10	25	13
P97384;D3Z7U0	P97384;D3Z7U0	Annexin A11;Annexin	Anxa11	-1.80123	-1.35427	-0.893718	0.202213		-0.878136	-0.599287	0.36042	-0.0554564	2.2445e-56	14	15	14	13
P97390	P97390	Vacuolar protein sorting-associated protein 45	Vps45	1.9362	1.77087	2.1301	1.79242		0.961253	0.797096	-0.844898	-0.656012	1.0104e-66	5	6	21	12
P97429;D3Z0S1;F7ANV6	P97429;D3Z0S1;F7ANV6	Annexin A4;Annexin	Anxa4	-3.09188	-3.17247	-3.1622	-3.23499	Down	-1.51334	-1.41169	1.26466	1.24263	0	81	48	63	30
P97434-5;P97434;P97434-4;P97434-2;F6RND9;P97434-3;F6S5I0;F6XZM9	P97434-5;P97434;P97434-4;P97434-2;F6RND9;P97434-3;F6S5I0	Myosin phosphatase Rho-interacting protein	Mprip	1.82105	-2.20753	-4.55284	-3.01281		0.90458	-0.98054	1.81897	1.15872	5.2124e-205	2	3	23	7
P97449	P97449	Aminopeptidase N	Anpep	3.49753	3.06986	6.15096	4.77313	Up	1.72966	1.37751	-2.44764	-1.7817	3.3987e-82	9	13	29	5
P97452	P97452	Ribosome biogenesis protein BOP1	Bop1	-0.316668	-0.651602	-0.329539	0.380172		-0.147506	-0.285319	0.135535	-0.122664	2.0496e-63	2	2	3	6
P97470	P97470	Serine/threonine-protein phosphatase 4 catalytic subunit	Ppp4c	-0.756588	-0.0702183	-0.47833	-0.752181		-0.364013	-0.0255441	0.194844	0.304978	0	14	7	22	4
P97478;Q3TYT1	P97478;Q3TYT1	Ubiquinone biosynthesis protein COQ7 homolog	Coq7	#VALUE!	-0.228673	-0.151254	-0.475878		NaN	-0.0963446	0.0644689	0.20063	1.2802e-19	0	4	9	2
Q6P4T3;P97480;P97480-2;A2A953	Q6P4T3;P97480;P97480-2;A2A953	Eyes absent homolog 3	Eya3	#VALUE!	-3.43264	-3.30949	-3.83315	Down	NaN	-1.52795	1.32337	1.46853	3.7634e-42	0	1	4	2
P97494	P97494	Glutamate--cysteine ligase catalytic subunit	Gclc	1.92262	1.77811	2.93627	2.03413		0.954569	0.80033	-1.16624	-0.747294	2.461e-30	4	2	9	10
P97742	P97742	Carnitine O-palmitoyltransferase 1, liver isoform	Cpt1a	2.92759	#VALUE!	3.68653	2.94997	Up	1.44917	NaN	-1.4653	-1.09317	5.6519e-14	1	0	7	2
P97770-2;P97770;P97770-3;D3YYB2	P97770-2;P97770	THUMP domain-containing protein 3	Thumpd3	-1.41765	-0.869084	-1.10294	-1.04752		-0.689357	-0.382495	0.443819	0.416515	1.0331e-39	1	4	8	4
P97807;P97807-2;H3BKG7	P97807;P97807-2	Fumarate hydratase, mitochondrial	Fh	1.34022	1.41487	1.57877	1.72092		0.667937	0.638027	-0.625133	-0.62901	0	45	53	31	36
P97822;P97822-2;E9PZF5;E9Q5H2;E9Q0X5;E9Q5H9;E9Q2G1	P97822;P97822-2;E9PZF5;E9Q5H2	Acidic leucine-rich nuclear phosphoprotein 32 family member E	Anp32e	-0.569097	-0.652586	-0.359072	-0.379264		-0.27174	-0.285759	0.147307	0.164143	0	14	10	16	13
P97823;J3QP56;P97823-2;D3Z111;J3QK48;D3Z269;D3YUG4;J3QQ63;J3QM41	P97823;J3QP56;P97823-2;D3Z111;J3QK48;D3Z269	Acyl-protein thioesterase 1	Lypla1	0.085307	0.14233	0.0273863	-0.129558		0.0503276	0.0694271	-0.00673868	0.0698396	3.1122e-136	7	12	18	8
P97825	P97825	Hematological and neurological expressed 1 protein	Hn1	-1.68596	-2.15984	-0.630956	-0.781445		-0.821406	-0.959234	0.255682	0.31603	0	7	5	16	3
P97855	P97855	Ras GTPase-activating protein-binding protein 1	G3bp1	-0.909611	-0.935164	-0.890895	-1.20178		-0.439324	-0.412021	0.359296	0.474773	0	51	32	65	34
P97927	P97927	Laminin subunit alpha-4	Lama4	5.25479	3.9503	5.17554	3.89943	Up	2.5945	1.77091	-2.05883	-1.45174	9.7661e-55	2	1	4	3
P97930;D3Z3R3;P97930-2	P97930;D3Z3R3	Thymidylate kinase	Dtymk	1.0781	0.799361	0.472083	0.488328		0.538935	0.363003	-0.183998	-0.16351	2.0291e-62	13	12	28	23
P98083;P98083-2;D3Z5U6;D3Z2I8;D3YZV5;D3YXZ9	P98083;P98083-2;D3Z5U6;D3Z2I8	SHC-transforming protein 1	Shc1	-0.561746	-0.914651	-0.506989	-0.521805		-0.268122	-0.402855	0.206268	0.217975	9.1411e-61	1	5	1	4
P98192;Q05DV2	P98192;Q05DV2	Dihydroxyacetone phosphate acyltransferase	Gnpat	-0.255807	0.0104346	-1.02684	-0.318436		-0.117553	0.0104934	0.413486	0.141171	7.6105e-26	12	7	5	5
P99024	P99024	Tubulin beta-5 chain	Tubb5	0.356322	0.206612	0.173682	0.0924135		0.183709	0.09815	-0.0650532	-0.0139896	0	87	146	76	111
P99026	P99026	Proteasome subunit beta type-4	Psmb4	-0.0635197	-0.109666	-0.368211	-0.439472		-0.022918	-0.0431701	0.150949	0.186881	0	35	20	35	38
P99027	P99027	60S acidic ribosomal protein P2	Rplp2	0.0390838	-0.013373	0.0859657	0.0832057		0.0275787	-0.000144301	-0.0300889	-0.0105122	0	26	50	24	74
H3BJQ7;P99029;P99029-2;G3UZJ4	H3BJQ7;P99029;P99029-2;G3UZJ4	Peroxiredoxin-5, mitochondrial	Prdx5	-0.778248	-0.748381	-0.880441	-0.854993		-0.374673	-0.328562	0.355129	0.343806	0	32	50	56	46
Q00422	Q00422	GA-binding protein alpha chain	Gabpa	-0.360701	-0.703405	-0.481174	-0.0995959		-0.169177	-0.308466	0.195977	0.0585243	1.7644e-10	3	2	4	5
Q00519	Q00519	Xanthine dehydrogenase/oxidase;Xanthine dehydrogenase;Xanthine oxidase	Xdh	-0.734264	-1.02335	1.03437	0.974811		-0.353026	-0.451425	-0.408129	-0.347234	0	65	68	86	81
Q00560	Q00560	Interleukin-6 receptor subunit beta	Il6st	4.09407	5.68446	3.22487	2.57252	Up	2.02326	2.54577	-1.28128	-0.95062	2.168e-161	4	6	15	16
Q00612;A3KG36;REV__P46662	Q00612;A3KG36	Glucose-6-phosphate 1-dehydrogenase X;Glucose-6-phosphate 1-dehydrogenase	G6pdx	0.58798	0.716205	0.107129	0.198127		0.29772	0.325847	-0.0385249	-0.053913	0	149	85	118	106
Q00780	Q00780	Collagen alpha-1(VIII) chain;Vastatin	Col8a1	#VALUE!	4.46858	4.84391	1.68558		NaN	2.00249	-1.92665	-0.615663	9.3899e-34	0	5	2	8
Q00915	Q00915	Retinol-binding protein 1	Rbp1	1.45652	1.63287	3.66212	4.15916		0.725174	0.735435	-1.45557	-1.54983	1.1912e-26	6	9	6	3
Q00993;Q6PE80;F6YPR4	Q00993;Q6PE80	Tyrosine-protein kinase receptor UFO	Axl	0.313687	#VALUE!	2.83589	2.36496		0.162726	NaN	-1.12623	-0.872235	7.2513e-18	4	0	4	5
Q00PI9;REV__E9Q6B2	Q00PI9	Heterogeneous nuclear ribonucleoprotein U-like protein 2	Hnrnpul2	0.917201	-1.0314	0.701303	0.706351		0.459746	-0.45502	-0.275367	-0.245848	2.0975e-212	8	1	4	2
Q01149;E0CXI2	Q01149	Collagen alpha-2(I) chain	Col1a2	6.38661	5.7394	3.97516	4.11436	Up	3.15153	2.57032	-1.58035	-1.53291	0	205	179	253	229
Q01279;Q9WVF5;B2KGF7;Q5SVE7	Q01279;Q9WVF5	Epidermal growth factor receptor	Egfr	3.30946	3.95229	6.64048	5.59991	Up	1.6371	1.7718	-2.64277	-2.09394	3.8478e-232	8	24	39	23
Q01320	Q01320	DNA topoisomerase 2-alpha	Top2a	-5.91428	#VALUE!	1.31991	-0.260497		-2.90239	NaN	-0.52195	0.11929	1.8362e-45	7	0	3	2
Q01405;E9Q1S3	Q01405;E9Q1S3	Protein transport protein Sec23A	Sec23a	0.322577	0.384708	0.281008	0.38654		0.167101	0.177727	-0.107834	-0.125069	0	102	66	115	81
Q01721	Q01721	Growth arrest-specific protein 1	Gas1	3.52602	-1.91092	3.89807	0.870738		1.74369	-0.848011	-1.54962	-0.30793	1.828e-71	2	3	2	2
Q01768	Q01768	Nucleoside diphosphate kinase B	Nme2	0.0719713	0.460595	0.806053	1.05252		0.0437644	0.211635	-0.317121	-0.376583	0	2	2	1	2
Q01853	Q01853	Transitional endoplasmic reticulum ATPase	Vcp	0.520434	0.462547	0.0240063	0.0492631		0.264476	0.212507	-0.00539137	0.0023065	0	353	234	252	242
Q02053;P31254	Q02053	Ubiquitin-like modifier-activating enzyme 1	Uba1	-1.09697	-1.26788	-1.01077	-0.953935		-0.531531	-0.560685	0.407081	0.381173	0	272	235	297	263
Q02248;E9Q6A9;F7CRC6;F7BAC9;F6QZ47;D3YUH4;E9PW26;D3Z5Q1	Q02248;E9Q6A9	Catenin beta-1	Ctnnb1	0.222461	0.32536	0.380893	0.692921		0.117828	0.151209	-0.14765	-0.240776	0	60	44	75	61
Q02257	Q02257	Junction plakoglobin	Jup	1.38871	1.09816	0.501312	0.780818		0.691802	0.496513	-0.195649	-0.273971	5.0138e-67	2	4	5	5
Q02788	Q02788	Collagen alpha-2(VI) chain	Col6a2	3.34997	3.32748	2.35339	2.19202		1.65705	1.49262	-0.933904	-0.806922	0	70	70	85	53
Q02819;H3BK79;D3Z7D7;D3Z1N1	Q02819;H3BK79	Nucleobindin-1	Nucb1	-0.367335	-0.350117	-0.854316	-0.590487		-0.172441	-0.150609	0.344715	0.243913	1.0313e-163	13	24	25	29
Q03145;G1K381;Q62413;Q61772;P54763-2;A2BDQ4;P54763;Q61772-3;Q61772-2;A3KG00;A3KG02;A3KG01;E9PUK8;O09127;Q03137;Q03137-2	Q03145	Ephrin type-A receptor 2	Epha2	-1.18466	-2.2217	-2.40699	-1.79132		-0.574691	-0.986874	0.963622	0.697418	2.0282e-120	12	3	16	14
Q03147	Q03147	Cyclin-dependent kinase 7	Cdk7	-0.883296	-0.180365	-1.63408	-1.47005		-0.426373	-0.0747601	0.655535	0.576087	5.0906e-16	4	2	3	3
Q03265;D3Z6F5;D6RJ16	Q03265;D3Z6F5	ATP synthase subunit alpha, mitochondrial;ATP synthase subunit alpha	Atp5a1	-0.481279	-0.489492	-2.34711	-2.45306		-0.22852	-0.212885	0.939753	0.947329	0	121	169	145	104
Q03350;Q05895;E9PWF0	Q03350	Thrombospondin-2	Thbs2	3.42359	3.35615	1.58783	1.70295		1.69328	1.50543	-0.628742	-0.622221	0	90	90	134	125
Q03958;G3UYF9	Q03958;G3UYF9	Prefoldin subunit 6	Pfdn6;H2-Ke2	-0.793414	-0.481308	#VALUE!	-0.806831		-0.382137	-0.209228	#VALUE!	0.325617	1.2638e-279	4	19	0	16
Q03963	Q03963	Interferon-induced, double-stranded RNA-activated protein kinase	Eif2ak2	-1.67175	-2.26726	-3.18862	-2.69429		-0.814413	-1.00723	1.27519	1.03844	0	13	18	40	30
Q04207;Q04207-2	Q04207;Q04207-2	Transcription factor p65	Rela	-1.22586	0.600022	-1.35425	-0.170465		-0.594966	0.273934	0.543991	0.0852886	2.5215e-27	3	5	12	2
Q04447	Q04447	Creatine kinase B-type	Ckb	4.8629	4.16329	7.60331	4.26727	Up	2.40163	1.86608	-3.02656	-1.59066	4.9549e-18	1	1	5	4
Q04690;Q04690-2;Q5SYH9;Q04690-3;Q04690-4	Q04690;Q04690-2	Neurofibromin	Nf1	-0.208738	0.0455029	0.757411	0.0693776		-0.0943872	0.0261627	-0.297733	-0.00528994	5.3387e-130	9	10	10	11
Q04692;Q04692-2	Q04692;Q04692-2	SWI/SNF-related matrix-associated actin-dependent regulator of chromatin subfamily A containing DEAD/H box 1	Smarcad1	-1.98505	-1.29183	-1.45583	-1.62841		-0.968605	-0.571386	0.584482	0.635894	3.3218e-32	3	5	8	6
Q04750	Q04750	DNA topoisomerase 1	Top1	0.00989247	-0.66031	0.25586	0.632374		0.0132121	-0.28921	-0.0978106	-0.21791	2.3113e-44	7	1	16	7
Q04857	Q04857	Collagen alpha-1(VI) chain	Col6a1	3.66809	3.44786	2.07719	2.00888		1.81361	1.54641	-0.823805	-0.737759	0	98	83	110	88
Q05186	Q05186	Reticulocalbin-1	Rcn1	0.181929	0.630056	0.237895	-0.00639515		0.0978804	0.287354	-0.0906492	0.0233263	0	26	16	27	20
Q05769	Q05769	Prostaglandin G/H synthase 2	Ptgs2	-2.50004	#VALUE!	-4.9359	-3.79375	Down	-1.22206	NaN	1.97166	1.45365	9.6686e-15	1	0	1	2
Q05816	Q05816	Fatty acid-binding protein, epidermal	Fabp5	-1.39969	-1.15409	-2.12776	-2.0546		-0.680521	-0.509841	0.852319	0.796847	0	42	45	55	43
Q05860-5;Q05860-2;E9Q7P6;Q05860-6;Q05860;Q05860-3	Q05860-5;Q05860-2;E9Q7P6;Q05860-6;Q05860;Q05860-3	Formin-1	Fmn1	-3.75995	-2.29982	-4.18303	-4.52078	Down	-1.84213	-1.02178	1.67157	1.72823	8.7605e-47	2	2	14	3
Q5XPI3-2;Q5XPI3;Q05CH9;E0CXL3;G3UYH5;E0CX26;E0CYS5	Q5XPI3-2;Q5XPI3;Q05CH9	E3 ubiquitin-protein ligase RNF123	Rnf123	-0.448289	-0.240534	2.23283	-0.116433		-0.212283	-0.101645	-0.885846	0.0648829	5.065e-13	5	1	3	4
Q05CL8;Q05CL8-2	Q05CL8	La-related protein 7	Larp7	-1.00988	-0.165979	0.171222	-0.0385852		-0.488674	-0.0683321	-0.0640725	0.0354831	5.2478e-160	8	8	15	7
Q05D44;REV__Q6DFZ2;REV__Q6ZWQ0-3;REV__F6W8R9;REV__D3YVK9	Q05D44	Eukaryotic translation initiation factor 5B	Eif5b	-1.04726	-1.19708	-0.960202	-1.0438		-0.50707	-0.529052	0.386921	0.41511	0	65	82	100	86
Q06138;D3YV52;D3Z704	Q06138	Calcium-binding protein 39	Cab39	-0.0569748	-0.465111	-0.189471	-0.00150563		-0.0196968	-0.201991	0.0797024	0.0214797	6.6184e-87	24	14	29	22
Q06180;Q06180-2;D3Z6W2	Q06180;Q06180-2;D3Z6W2	Tyrosine-protein phosphatase non-receptor type 2	Ptpn2	-0.572391	-1.88903	-1.09761	-2.41723		-0.273361	-0.838228	0.441696	0.933799	1.1299e-40	2	2	6	1
Q07076	Q07076	Annexin A7	Anxa7	-1.3722	-1.48458	-0.828862	-0.616526		-0.666989	-0.657513	0.334568	0.253747	3.708e-121	23	41	37	27
Q07113;F6SFP4	Q07113	Cation-independent mannose-6-phosphate receptor	Igf2r	-3.50783	-3.2252	-4.19166	-2.84278	Down	-1.71805	-1.43526	1.675	1.09451	0	76	73	107	76
Q07417;F6RAZ3	Q07417;F6RAZ3	Short-chain specific acyl-CoA dehydrogenase, mitochondrial	Acads	-0.493981	0.199365	0.282062	0.956969		-0.234771	0.0949116	-0.108254	-0.340495	0	29	12	29	13
Q07797;E9Q5X5	Q07797;E9Q5X5	Galectin-3-binding protein	Lgals3bp	4.53089	2.57789	-0.376676	-0.0619955		2.23824	1.15769	0.154324	0.0443242	5.8359e-215	29	34	74	46
Q07813	Q07813	Apoptosis regulator BAX	Bax	-1.95219	-1.81851	-1.64532	-1.87267		-0.952434	-0.80672	0.660016	0.728138	0	21	15	26	11
Q08024;Q08024-4;Q08024-3	Q08024;Q08024-4;Q08024-3	Core-binding factor subunit beta	Cbfb	-0.616656	-1.22286	-0.046614	0.143986		-0.295146	-0.540568	0.0227584	-0.0334662	9.2206e-224	4	7	16	7
Q08024-2	Q08024-2			0.0540005	#VALUE!	0.0734958	-0.240751		0.03492	NaN	-0.0251183	0.111833	2.4632e-203	2	0	4	1
Q08091;Q08091-2	Q08091;Q08091-2	Calponin-1	Cnn1	7.6933	8.70105	9.66217	8.62172	Up	3.79462	3.89365	-3.84724	-3.23514	0	47	35	122	57
Q08093;D3Z7R6	Q08093;D3Z7R6	Calponin-2	Cnn2	1.53024	2.974	3.25836	2.8431	Up	0.761455	1.33468	-1.29463	-1.05281	0	77	67	122	61
Q08288;D3Z345;D3Z7N3;D3Z5X8;D3YU83;D3Z009;D6RDT2	Q08288	Cell growth-regulating nucleolar protein	Lyar	-1.43776	-1.22967	-1.47484	-1.73795		-0.699255	-0.543614	0.592062	0.67726	0	35	22	34	14
Q08509;Q3UGL1;D3Z5I5;D3Z7F4	Q08509;Q3UGL1	Epidermal growth factor receptor kinase substrate 8	Eps8	-2.8163	-2.5922	-1.65539	-1.61042		-1.37771	-1.15242	0.664028	0.6291	1.8689e-62	6	4	9	4
Q08761	Q08761	Vitamin K-dependent protein S	Pros1	2.60984	2.76705	6.271	5.43865	Up	1.29278	1.24221	-2.49549	-2.03304	7.5406e-08	3	1	2	2
Q08943-2;Q08943;A2AW05	Q08943-2;Q08943;A2AW05	FACT complex subunit SSRP1	Ssrp1	1.42245	0.884099	0.201161	0.280095		0.708408	0.400866	-0.0760066	-0.0848692	6.5667e-83	9	4	14	16
Q09143;E9Q3N1;D3Z161	Q09143;E9Q3N1	High affinity cationic amino acid transporter 1	Slc7a1	1.36466	#VALUE!	3.83505	2.66381		0.679964	NaN	-1.5245	-0.985102	3.5832e-15	6	0	6	2
Q09XV5;F7AL76;Q09XV5-2	Q09XV5;F7AL76	Chromodomain-helicase-DNA-binding protein 8	Chd8	-2.04327	#VALUE!	0.100778	-1.47875		-0.997262	NaN	-0.0359933	0.579373	5.5481e-13	2	0	1	2
Q0KL02-4;Q0KL02;Q0KL02-2;A2CG49-7;A2CG49;A2CG49-2;F6QYT9;D3Z4R2;D3Z535;D3Z532;A2CG49-6;D3Z534;A2CG49-4;A2CG49-8;A2CG49-9;B1B1A7	Q0KL02-4;Q0KL02	Triple functional domain protein	Trio	-1.78752	-2.11589	-1.64395	-1.05067		-0.87139	-0.939593	0.659468	0.417704	4.1537e-136	18	25	28	12
Q0P688;Q8BMB3;D3Z730;D3YUV9;D3Z729;G3X9H1;Q3UUT0	Q0P688;Q8BMB3;D3Z730;D3YUV9;D3Z729;G3X9H1;Q3UUT0	Eukaryotic translation initiation factor 4E type 2	Eif4e2	0.162417	-0.423634	-0.301424	-0.480527		0.0882773	-0.183458	0.124328	0.202386	2.5137e-30	8	6	8	7
Q0PD20;Q64008;B1AQD4;B1AQD3;F7BE32	Q0PD20;Q64008;B1AQD4;B1AQD3;F7BE32	Ras-related protein Rab-34	Rab34	0.660992	0.774409	1.42639	1.72388		0.333653	0.351855	-0.564393	-0.630126	6.5179e-206	21	12	36	18
Q0VGB7	Q0VGB7	Serine/threonine-protein phosphatase 4 regulatory subunit 2	Ppp4r2	-1.44462	-2.27954	-1.75696	-1.83512		-0.702633	-1.01272	0.704518	0.71396	8.0145e-133	9	2	10	6
Q11011;E9Q039;F6QYF8;E9Q6F4;F6V7K3;F7ANF4;F2Z3V5	Q11011;E9Q039;F6QYF8;E9Q6F4	Puromycin-sensitive aminopeptidase	Npepps	-1.13973	-1.02547	-0.450395	-0.466557		-0.552579	-0.452372	0.183709	0.19711	0	60	45	67	51
Q11136;G3UXC5	Q11136	Xaa-Pro dipeptidase	Pepd	-0.642814	-0.872453	0.93746	0.172043		-0.308019	-0.384	-0.369501	-0.0440624	6.008e-250	16	16	7	13
Q14AA6	Q14AA6		1700009N14Rik	-2.33596	-1.61937	0.648597	-0.984319		-1.1413	-0.717738	-0.254358	0.392647	0	4	3	2	2
Q14AR7;Q9DAT2;Q9DAT2-2	Q14AR7;Q9DAT2;Q9DAT2-2	MRG-binding protein	1600027N09Rik;Mrgbp	-1.75817	-1.34475	-2.07363	-2.15165		-0.856946	-0.595032	0.830742	0.833497	1.268e-42	2	2	2	2
Q14C51	Q14C51	Pentatricopeptide repeat-containing protein 3, mitochondrial	Ptcd3	0.241311	0.22226	0.740369	0.805284		0.127105	0.105142	-0.290939	-0.283211	2.1503e-187	27	15	27	27
Q1HFZ0;H3BKN0;Q1HFZ0-2;H3BJF3	Q1HFZ0;H3BKN0;Q1HFZ0-2	tRNA (cytosine(34)-C(5))-methyltransferase	Nsun2	-1.14055	-1.10346	-1.24743	-1.13998		-0.552982	-0.487217	0.501414	0.451435	0	69	34	58	42
Q1W617;Q1W617-2	Q1W617;Q1W617-2	Protein Shroom4	Shroom4	-0.126407	-1.00671	-1.35276	-0.836283		-0.0538681	-0.443988	0.543397	0.33674	5.7851e-94	7	1	5	1
Q20BD0;Q99020;Q80XR6	Q20BD0;Q99020;Q80XR6	Heterogeneous nuclear ribonucleoprotein A/B	Hnrnpab	-0.728093	-0.894947	-1.20784	-1.46954		-0.349989	-0.394051	0.485633	0.575893	0	49	41	50	42
Q2EMV9;Q2EMV9-2	Q2EMV9;Q2EMV9-2	Poly [ADP-ribose] polymerase 14	Parp14	-1.18239	-2.35723	-4.08396	-4.04864		-0.573574	-1.04743	1.63208	1.54992	1.0363e-49	1	1	14	6
Q2PZL6;Q2PZL6-2	Q2PZL6;Q2PZL6-2	Protocadherin Fat 4	Fat4	4.18817	3.26083	2.56548	2.42273	Up	2.06956	1.46284	-1.01844	-0.894054	9.7105e-75	3	2	16	6
Q2TPA8;B1AX78;B1AX77	Q2TPA8;B1AX78;B1AX77	Hydroxysteroid dehydrogenase-like protein 2	Hsdl2	3.49452	#VALUE!	1.85402	1.98064		1.72818	NaN	-0.734851	-0.727093	2.1774e-10	1	0	5	2
Q31125	Q31125	Zinc transporter SLC39A7	Slc39a7	1.38363	1.13389	1.60955	2.00201		0.689299	0.51248	-0.637401	-0.735163	3.7321e-62	7	15	15	10
Q3KNM2;F6W8T3	Q3KNM2	E3 ubiquitin-protein ligase MARCH5	2005-03-01	0.703942	0.430059	-0.290784	-0.192367		0.354791	0.197991	0.120086	0.0935602	7.8569e-64	10	12	22	14
Q3LAC4;Q3LAC4-2	Q3LAC4;Q3LAC4-2	Phosphatidylinositol 3,4,5-trisphosphate-dependent Rac exchanger 2 protein	Prex2	1.75438	#VALUE!	3.26476	3.87859		0.871765	NaN	-1.29718	-1.44387	3.4984e-15	2	0	5	1
Q3SXD3;E0CYK6	Q3SXD3	HD domain-containing protein 2	Hddc2	-0.296154	-0.313872	0.0885905	0.0801286		-0.13741	-0.134414	-0.0311351	-0.00935009	1.2e-87	10	5	9	11
Q8BZM1;Q3T9A5;D3Z0L3;D6RGR3	Q8BZM1;Q3T9A5	Glomulin	Glmn	-0.44924	-1.13804	-0.80178	-0.791865		-0.212751	-0.502669	0.323774	0.319965	1.1975e-150	13	12	21	11
Q3TAS6;Q3TAS6-2;D3Z665	Q3TAS6;Q3TAS6-2;D3Z665	UPF0510 protein INM02	Inm02;2310044H10Rik	#VALUE!	1.76325	0.384904	0.560719		NaN	0.793688	-0.149249	-0.190849	4.8561e-08	0	4	3	1
Q3TB82	Q3TB82	Pleckstrin homology domain-containing family F member 1	Plekhf1	0.244798	3.69024	0.159247	0.433024		0.128821	1.65471	-0.0592994	-0.142624	1.079e-77	7	1	9	1
Q3TBT3-2;Q3TBT3	Q3TBT3-2;Q3TBT3	Transmembrane protein 173	Tmem173	0.294508	-0.408599	0.144532	0.599066		0.153287	-0.17674	-0.0534339	-0.20533	3.5358e-55	18	3	16	6
Q3U2K8;Q80WC7;Q3TBU7;Q80WC7-2	Q3U2K8;Q80WC7;Q3TBU7;Q80WC7-2	Arf-GAP domain and FG repeat-containing protein 2	Agfg2	-0.979521	#VALUE!	-0.350894	-1.07632		-0.473731	NaN	0.144046	0.427392	4.296e-26	2	0	4	1
Q3TBW2;A2A715	Q3TBW2;A2A715	39S ribosomal protein L10, mitochondrial	Mrpl10	1.27964	1.41072	1.39468	1.41769		0.63812	0.636172	-0.551754	-0.514491	2.3642e-211	16	20	26	14
Q3TC46	Q3TC46	Protein PAT1 homolog 1	Patl1	-3.5451	-1.22488	-2.27507	#VALUE!		-1.73639	-0.541471	0.91104	#VALUE!	5.5849e-10	1	1	2	0
Q3TC93	Q3TC93	HCLS1-binding protein 3	Hs1bp3	-3.01248	-2.79648	-2.87335	#VALUE!	Down	-1.47425	-1.24369	1.14952	#VALUE!	4.0346e-38	5	5	3	0
Q9WUR2;Q3TCD4;Q9WUR2-2;E9PVM6;E9PYA9;E9PUY9;E9Q858;E9PYC6;E9Q7A8;Q78JN3;E9PY42	Q9WUR2;Q3TCD4;Q9WUR2-2;E9PVM6;E9PYA9;E9PUY9;E9Q858;E9PYC6;E9Q7A8	Enoyl-CoA delta isomerase 2, mitochondrial	Eci2	1.45599	1.4954	1.09402	1.28623		0.724912	0.674009	-0.431909	-0.464843	2.0756e-96	6	6	8	3
Q3TCH7;E9PXT5;F6UV36	Q3TCH7	Cullin-4A	Cul4a	0.785548	0.857579	0.94612	1.02431		0.394953	0.389016	-0.372954	-0.365927	2.4719e-118	13	4	17	10
Q3TCN2;Q3TCN2-2	Q3TCN2;Q3TCN2-2	Putative phospholipase B-like 2;Putative phospholipase B-like 2 28 kDa form;Putative phospholipase B-like 2 40 kDa form;Putative phospholipase B-like 2 15 kDa form	Plbd2	2.27346	2.43755	2.50678	2.497		1.12724	1.09498	-0.995046	-0.922101	0	25	26	56	33
Q3TCU5;Q9R233;Q9R233-2;G3UZZ2;G3UWL0	Q3TCU5;Q9R233;Q9R233-2	Tapasin	Tapbp	0.595126	0.399233	-1.9591	-1.61314		0.301236	0.184217	0.78509	0.630126	2.9494e-30	3	7	11	8
Q3TCX3-4;Q3TCX3;Q3TCX3-2;Q3TCX3-3	Q3TCX3-4;Q3TCX3;Q3TCX3-2;Q3TCX3-3	UPF0469 protein KIAA0907	Kiaa0907	#VALUE!	-0.236309	-2.10765	-0.780831		NaN	-0.0997573	0.844305	0.315798	3.4459e-11	0	1	2	2
Q3TDD9;Q3TDD9-3	Q3TDD9	Protein phosphatase 1 regulatory subunit 21	Ppp1r21	0.533096	#VALUE!	0.453014	0.492483		0.270708	NaN	-0.176397	-0.165079	2.8813e-51	7	0	6	4
Q3TDN2;Q3TDN2-2;D3Z2H4;D3YUP4;D3Z4G9;D6RE51	Q3TDN2;Q3TDN2-2;D3Z2H4	FAS-associated factor 2	Faf2	1.10342	1.30256	0.407613	0.751415		0.551393	0.587845	-0.158301	-0.262867	1.2722e-183	17	25	26	18
Q3TDQ1	Q3TDQ1	Dolichyl-diphosphooligosaccharide--protein glycosyltransferase subunit STT3B	Stt3b	1.80944	2.29998	1.30528	1.54514		0.898866	1.03351	-0.51612	-0.562623	1.5097e-42	6	2	8	1
Q9R1R2;Q3TDT0;D3Z7V9;D3YUY7	Q9R1R2;Q3TDT0	Tripartite motif-containing protein 3	Trim3	0.960362	0.901901	0.32034	0.339834		0.480989	0.408821	-0.123513	-0.10743	2.7409e-71	3	4	7	9
Q3TE40;Q62193;F6V8R7	Q3TE40;Q62193	Replication protein A 32 kDa subunit	Rpa2	0.46898	0.727263	0.882288	0.700467		0.239154	0.330788	-0.347509	-0.243626	5.4731e-217	14	7	24	12
Q3TE80;D3Z276;D3Z520	Q3TE80		2410002F23Rik	-1.48449	-1.2912	0.407977	1.03451		-0.722253	-0.571107	-0.158445	-0.369781	1.57e-09	2	3	2	1
Q3TEA8;Q3TEA8-2;Q3TEA8-3;A2AM65;A2AM63;A2AM62;A2AM70;A2AM69	Q3TEA8;Q3TEA8-2;Q3TEA8-3;A2AM65	Heterochromatin protein 1-binding protein 3	Hp1bp3	1.77019	1.67851	0.739749	0.605368		0.879549	0.755828	-0.290692	-0.207711	1.335e-145	36	25	44	29
Q3TFD2;Q3TFD2-2;Q3TFD2-3	Q3TFD2;Q3TFD2-2	Lysophosphatidylcholine acyltransferase 1	Lpcat1	-1.43229	-0.767941	-0.99491	-0.560367		-0.696564	-0.337302	0.400756	0.232538	2.0587e-11	1	2	1	3
Q3V2H3;Q3TGS7;Q6ZWQ5;O70493	Q3V2H3;Q3TGS7;Q6ZWQ5;O70493	Sorting nexin-12	Snx12	-0.147846	-0.152365	0.0556045	0.115434		-0.0644196	-0.0622489	-0.0179867	-0.0226834	1.2036e-209	26	43	25	32
Q3THE2;D3Z249	Q3THE2	Myosin regulatory light chain 12B	Myl12b	3.06823	2.58888	3.16346	3.75528	Up	1.51838	1.1626	-1.2568	-1.3973	0	6	11	14	8
Q3THJ3	Q3THJ3	Probable RNA-binding protein EIF1AD	Eif1ad	-4.06437	-4.10123	-3.87822	-3.6402	Down	-1.99194	-1.82669	1.55006	1.39567	3.4366e-66	4	2	7	5
Q3THK3	Q3THK3	General transcription factor IIF subunit 1	Gtf2f1	-1.20785	-1.04728	-0.805247	#VALUE!		-0.586103	-0.462117	0.325156	#VALUE!	2.4273e-72	14	5	5	0
Q3THK7	Q3THK7	GMP synthase [glutamine-hydrolyzing]	Gmps	-1.35795	-1.36005	-0.727868	-0.750634		-0.659973	-0.601869	0.294312	0.304394	0	96	59	95	69
Q3THS6	Q3THS6	S-adenosylmethionine synthase isoform type-2	Mat2a	-1.72759	-2.11378	-1.59922	-2.46908		-0.841896	-0.938652	0.641638	0.953377	0	31	23	38	22
Q3TIR3;Q80XE1-1;Q80XE1	Q3TIR3	Synembryn-A	Ric8a	-0.488639	0.448024	0.710776	0.130754		-0.232142	0.206018	-0.279144	-0.0284693	1.7001e-97	3	1	3	3
Q3TIU4	Q3TIU4	2,5-phosphodiesterase 12	Pde12	-0.424848	-0.663942	0.205895	0.251638		-0.200747	-0.290833	-0.0778935	-0.074122	1.1271e-33	3	5	9	4
Q3TIV5;Q3TIV5-2;Q3TIV5-3	Q3TIV5;Q3TIV5-2	Zinc finger CCCH domain-containing protein 15	Zc3h15	-1.72654	-1.6516	-1.15157	-1.34609		-0.841379	-0.732141	0.463204	0.529271	6.6598e-187	19	10	24	11
Q3TIX9	Q3TIX9	U4/U6.U5 tri-snRNP-associated protein 2	Usp39	-0.880265	-0.803215	-0.668052	-0.600472		-0.424881	-0.353063	0.270469	0.247684	8.8233e-111	16	6	15	11
Q3TJD7;Q8BVJ7;B8JJB3;Q3TJD7-3;B8JJB2;Q3TJD7-2;B8JJB1	Q3TJD7;Q8BVJ7;B8JJB3;Q3TJD7-3;B8JJB2	PDZ and LIM domain protein 7	Pdlim7	-0.505109	0.270824	-0.980076	-0.762063		-0.240248	0.126841	0.394843	0.30871	1.9581e-219	14	6	16	9
Q3TJZ6	Q3TJZ6	Protein FAM98A	Fam98a	0.744917	0.284986	0.553709	0.45404		0.374956	0.133169	-0.216535	-0.150561	2.0073e-131	9	9	17	12
Q3TKT4-2;Q3TKT4;G3UX35	Q3TKT4-2;Q3TKT4;G3UX35	Transcription activator BRG1	Smarca4	-2.16589	-2.89766	-1.52563	-1.87681		-1.0576	-1.28891	0.612305	0.729705	1.1679e-89	20	12	19	3
Q9R1Q9;Q3TKX1;B7FAU3;B7FAU7;F6X9J0;F6ZE56	Q9R1Q9;Q3TKX1;B7FAU3	V-type proton ATPase subunit S1	Atp6ap1	2.24014	1.6319	1.7886	1.5264		1.11083	0.735002	-0.708774	-0.555545	2.7202e-56	5	6	14	4
Q8C878;Q3TL72;Q8C878-2	Q8C878;Q3TL72;Q8C878-2	NEDD8-activating enzyme E1 catalytic subunit	Uba3	-0.647136	-0.837128	-0.064738	0.234064		-0.310146	-0.368216	0.0299829	-0.0674852	6.3765e-104	14	7	13	11
Q3TLH4;Q3TLH4-5	Q3TLH4;Q3TLH4-5	Protein PRRC2C	Prrc2c	-1.78972	-3.06408	-1.70799	-2.59692		-0.872472	-1.36327	0.684998	1.00166	0	31	28	57	32
Q3TLP5;Q3TLP5-2;Q3TLP5-3;F6YTG0;F6Z5N5;E0CXC8	Q3TLP5;Q3TLP5-2;Q3TLP5-3;F6YTG0;F6Z5N5	Enoyl-CoA hydratase domain-containing protein 2, mitochondrial	Echdc2	-0.648225	-0.849195	-0.00973086	-0.253104		-0.310683	-0.373608	0.00805654	0.116498	1.2294e-74	7	14	14	6
Q3TMH2;A2AWQ9	Q3TMH2;A2AWQ9	Secernin-3	Scrn3	-1.03135	-1.53923	-1.00203	#VALUE!		-0.499239	-0.681932	0.403595	#VALUE!	3.3483e-08	1	1	2	0
Q3TMW1;E0CYE3	Q3TMW1	Coiled-coil domain-containing protein 102A	Ccdc102a	2.00863	1.29891	0.419144	0.404498		0.996895	0.586212	-0.162896	-0.131851	4.2989e-34	2	1	3	8
Q3TMX5;Q80ZP8;Q9CXI5;E0CXA8;F6T4L3;F6USD5;F7C1S6	Q3TMX5;Q80ZP8;Q9CXI5;E0CXA8;F6T4L3;F6USD5	Mesencephalic astrocyte-derived neurotrophic factor	Manf	3.35109	3.25906	2.88715	2.97589	Up	1.65759	1.46205	-1.14666	-1.10296	0	50	42	46	41
Q3TN85;P54726;Q8CAP3;F6YL88	Q3TN85;P54726;Q8CAP3	UV excision repair protein RAD23 homolog A	Rad23a	-1.24108	-2.26435	-0.478013	-0.93335		-0.60246	-1.00593	0.194718	0.373398	1.8302e-131	6	3	3	4
Q3TNL8;Q3TNL8-2	Q3TNL8;Q3TNL8-2	Inositol 1,4,5-trisphosphate receptor-interacting protein	Itprip	-0.554764	-1.78877	-1.52255	#VALUE!		-0.264686	-0.793432	0.611078	#VALUE!	3.4354e-11	1	1	5	0
Q3TQC7;Q9WUZ9	Q3TQC7;Q9WUZ9	Ectonucleoside triphosphate diphosphohydrolase 5	Entpd5	3.83503	3.49669	3.99969	2.74399	Up	1.89577	1.56823	-1.59014	-1.01537	5.5507e-47	3	4	6	1
Q3TSQ6;P56371	Q3TSQ6;P56371	Ras-related protein Rab-4A	Rab4a	2.27844	2.11646	2.83163	2.50678		1.12968	0.951513	-1.12453	-0.925796	3.2981e-67	9	5	13	5
Q3TUE1;Q91WJ8;Q91WJ8-2	Q3TUE1;Q91WJ8;Q91WJ8-2	Far upstream element-binding protein 1	Fubp1	-1.97995	-1.75753	-2.06527	-1.92375		-0.966094	-0.779472	0.827413	0.74743	0	39	25	50	31
Q3TUU5;D3Z094;D3Z1S9;D3Z7L3	Q3TUU5;D3Z094;D3Z1S9	Testis-expressed sequence 30 protein	Tex30;1700029F09Rik	#VALUE!	-2.44236	-2.31051	-2.31427		NaN	-1.08547	0.925164	0.894915	2.3944e-08	0	2	6	2
Q3TVI8;D3YUE1;D3Z2F0;D3YY15	Q3TVI8	Pre-B-cell leukemia transcription factor-interacting protein 1	Pbxip1	4.5353	4.80838	6.22436	5.94371	Up	2.24041	2.15432	-2.4769	-2.22378	8.2519e-56	6	5	17	10
Q3TW27;Q922L6	Q3TW27;Q922L6	Negative elongation factor D	Th1l	-0.606602	-1.17734	-0.372446	-0.409148		-0.290198	-0.520231	0.152638	0.175429	3.5463e-20	11	5	7	5
Q3TW96;Q3TW96-2	Q3TW96;Q3TW96-2	UDP-N-acetylhexosamine pyrophosphorylase-like protein 1	Uap1l1	-1.49112	-1.45004	-0.216766	-0.0848948		-0.725518	-0.642076	0.0905825	0.0529723	0	59	48	50	54
Q3TWW8	Q3TWW8		Srsf6	-0.975615	0.00176848	-0.279109	-0.661122		-0.471809	0.00662125	0.115433	0.270589	4.5213e-126	13	11	10	17
Q3TX08;E9PWD4;H3BKS8;H3BKB8;H3BL70;D3Z413;H3BK68;H3BKV3;D6RG86;D6RFC0	Q3TX08;E9PWD4;H3BKS8;H3BKB8;H3BL70;D3Z413;H3BK68;H3BKV3	tRNA (guanine(26)-N(2))-dimethyltransferase	Trmt1	-0.817736	-1.45246	-0.999293	#VALUE!		-0.394108	-0.643158	0.402504	#VALUE!	4.2074e-132	10	3	6	0
Q8VDQ1;Q8VDQ1-2;Q3TXN1;D6RGL6	Q8VDQ1;Q8VDQ1-2;Q3TXN1	Prostaglandin reductase 2	Ptgr2	-2.73324	-2.42043	-2.57383	-1.97348		-1.33683	-1.07567	1.03012	0.766213	1.5984e-20	3	6	1	4
Q3TXS7;J3QN38;D6RGR5	Q3TXS7	26S proteasome non-ATPase regulatory subunit 1	Psmd1	-0.127259	-0.0900307	-0.190498	-0.160008		-0.0542875	-0.0343967	0.0801119	0.0813395	0	122	49	136	85
Q3TXU5;F6W7I2	Q3TXU5;F6W7I2	Deoxyhypusine synthase	Dhps	-3.00734	-2.69908	-2.60524	-2.96252	Down	-1.47173	-1.20018	1.04264	1.13973	2.4354e-51	10	1	9	2
Q3TXV4;Q921E2	Q3TXV4;Q921E2	Ras-related protein Rab-31	Rab31	2.23701	2.19138	2.53322	2.40927		1.10929	0.98499	-1.00558	-0.888969	9.6139e-123	10	14	21	11
Q3TYS2;E9Q3W5;E9PZ42	Q3TYS2	Uncharacterized protein C17orf62 homolog		2.81532	2.46044	2.31871	2.11115		1.39391	1.10521	-0.920079	-0.77638	1.9141e-37	8	11	7	5
Q3TYX2	Q3TYX2	LRRN4 C-terminal-like protein	Lrrn4cl	5.94016	5.9758	5.44696	4.37449	Up	2.93182	2.67595	-2.16702	-1.63115	1.2419e-09	3	1	4	4
Q3TYX3	Q3TYX3	SET and MYND domain-containing protein 5	Smyd5	-2.1778	-2.2709	-2.11108	-2.32125		-1.06347	-1.00886	0.845671	0.89755	1.6858e-57	7	7	15	8
Q3TZX8;Q3TZX8-2;Q3TZX8-3	Q3TZX8;Q3TZX8-2;Q3TZX8-3	Polynucleotide 5-hydroxyl-kinase NOL9	Nol9	-0.0970985	1.09404	#VALUE!	0.355422		-0.0394439	0.494672	#VALUE!	-0.113317	6.8062e-33	2	1	0	1
Q3TZZ7;Q3TZZ7-2	Q3TZZ7	Extended synaptotagmin-2	Esyt2	0.672368	0.703298	0.147989	0.0249311		0.339251	0.32008	-0.0548118	0.0114957	0	32	19	45	35
Q3U0M1;Q3U0M1-2;Q3U0M1-3;E9Q3T8;E9PZ41;Q3U0M1-4;Q3U0M1-5	Q3U0M1;Q3U0M1-2;Q3U0M1-3;E9Q3T8;E9PZ41	Trafficking protein particle complex subunit 9	Trappc9	-3.31399	#VALUE!	3.46443	2.58494		-1.62264	NaN	-1.37677	-0.955312	1.9154e-31	2	0	1	3
Q3U0V1	Q3U0V1	Far upstream element-binding protein 2	Khsrp	0.748983	0.617333	0.66877	0.841624		0.376957	0.281669	-0.2624	-0.296935	0	77	46	81	56
Q3U0V2;D6RGL2;D6RCI0	Q3U0V2	Tumor necrosis factor receptor type 1-associated DEATH domain protein	Tradd	-0.649499	-0.763255	-0.819088	-0.695799		-0.311309	-0.335208	0.330673	0.283685	7.3555e-233	12	5	11	7
Q3U186;A2AT41	Q3U186	Probable arginine--tRNA ligase, mitochondrial	Rars2	1.08113	1.37584	1.11867	0.681249		0.540424	0.620586	-0.441732	-0.236368	2.0451e-79	7	3	18	4
Q3U1J4	Q3U1J4	DNA damage-binding protein 1	Ddb1	-0.0590556	-0.0672621	-0.623066	-0.57108		-0.0207209	-0.0242231	0.252537	0.236584	0	127	85	148	114
Q3U2A8;F6YJY2	Q3U2A8;F6YJY2	Valine--tRNA ligase, mitochondrial	Vars2	-0.313974	#VALUE!	-0.249251	-1.09785		-0.14618	NaN	0.103531	0.435522	1.3242e-08	2	0	2	3
Q3U2G2;Q61316	Q3U2G2;Q61316	Heat shock 70 kDa protein 4	Hspa4	-2.09935	-2.21927	-2.11128	-2.03608		-1.02485	-0.985788	0.845751	0.789854	0	184	111	156	158
Q3U319	Q3U319	E3 ubiquitin-protein ligase BRE1B	Rnf40	0.0367823	-0.193108	-0.104575	0.543576		0.0264459	-0.080454	0.0458623	-0.184375	1.9821e-60	7	5	9	2
Q3U487	Q3U487	E3 ubiquitin-protein ligase HECTD3	Hectd3	1.7547	#VALUE!	-0.498823	1.75016		0.871923	NaN	0.203013	-0.640052	1.2486e-11	1	0	4	1
Q3U4G3	Q3U4G3	Xyloside xylosyltransferase 1	Xxylt1	2.22094	1.60287	2.48743	2.80547		1.10138	0.722029	-0.987331	-1.0386	1.5645e-19	3	1	9	5
Q3U4W8;P56399;D3YYA5;D3Z4K7	Q3U4W8;P56399	Ubiquitin carboxyl-terminal hydrolase;Ubiquitin carboxyl-terminal hydrolase 5	Usp5	-0.142671	-0.0395703	0.0086717	0.0272056		-0.0618724	-0.0118498	0.000721131	0.0106367	0	90	52	81	76
Q3U4X8;D3YUC0	Q3U4X8;D3YUC0	DNA ligase	Lig1	-2.41193	-2.44099	-2.49698	-2.48541		-1.1787	-1.08485	0.999495	0.959548	0	40	45	46	38
Q3U5F4;G8JL83	Q3U5F4	YrdC domain-containing protein, mitochondrial	Yrdc	-1.34814	-1.15478	-1.0075	-1.05524		-0.655149	-0.510149	0.405775	0.419431	7.4803e-73	6	5	12	7
Q3U6N9;Q3U6N9-3;Q3U6N9-2	Q3U6N9;Q3U6N9-3;Q3U6N9-2	UPF0488 protein C8orf33 homolog		0.364314	#VALUE!	-0.208599	1.48757		0.187641	NaN	0.0873271	-0.540883	1.2218e-11	2	0	3	1
Q3U741;Q501J6;Q501J6-2	Q3U741;Q501J6;Q501J6-2	Probable ATP-dependent RNA helicase DDX17	Ddx17	0.638342	0.520541	0.987557	0.901649		0.322505	0.23842	-0.38947	-0.319604	5.8283e-301	28	24	44	33
Q3U7M5;Q8VD66;Q8C0M2	Q3U7M5;Q8VD66;Q8C0M2	Abhydrolase domain-containing protein 4	Abhd4	0.726776	#VALUE!	0.977991	0.192539		0.366028	NaN	-0.385658	-0.0518029	1.6734e-09	2	0	4	1
Q3U7R1;Q3U7R1-2	Q3U7R1;Q3U7R1-2	Extended synaptotagmin-1	Esyt1	2.00083	1.93657	1.55335	1.5582		0.993058	0.871134	-0.615	-0.567554	0	79	80	96	97
Q3U8Y1;Q9DCA2	Q3U8Y1;Q9DCA2	28S ribosomal protein S11, mitochondrial	Mrps11	#VALUE!	1.16991	1.16747	1.01747		NaN	0.528571	-0.461184	-0.363345	3.3548e-34	0	7	9	4
Q3U962	Q3U962	Collagen alpha-2(V) chain	Col5a2	5.3268	4.79793	7.62192	-0.411851	Up	2.62994	2.14965	-3.03398	0.17645	0	31	16	53	26
Q3U9G9	Q3U9G9	Lamin-B receptor	Lbr	-1.2684	-2.14481	-3.65545	-2.77799		-0.615906	-0.952517	1.46127	1.07005	3.8067e-84	8	2	15	7
Q61337;Q3U9H3;D3YZR8;F7ABX5;F6S493	Q61337;Q3U9H3;D3YZR8;F7ABX5	Bcl2 antagonist of cell death	Bad	-0.465012	-0.356108	0.825586	#VALUE!		-0.220513	-0.153286	-0.324907	#VALUE!	6.4213e-39	1	1	2	0
Q3UA06;Q3UA06-2	Q3UA06;Q3UA06-2	Pachytene checkpoint protein 2 homolog	Trip13	-1.80959	-2.11199	-2.33993	-2.25402		-0.882252	-0.937851	0.936892	0.872159	2.0032e-103	11	8	10	6
Q3UA16;Q3UA16-3;A2AUT4;Q3UA16-2;A2AUT3;A2AUT1	Q3UA16;Q3UA16-3;A2AUT4;Q3UA16-2;A2AUT3;A2AUT1	Kinetochore protein Spc25	Spc25	0.465999	0.480332	-0.0523098	-0.214857		0.237686	0.220454	0.0250288	0.102053	1.7077e-20	5	5	8	4
Q3UCV8	Q3UCV8	Protein FAM105B	Fam105b	-1.49947	-1.42509	-0.458034	-0.936591		-0.729627	-0.63093	0.186754	0.374622	1.4829e-17	3	4	5	3
Q3UDE2;F2Z423	Q3UDE2	Tubulin--tyrosine ligase-like protein 12	Ttll12	-0.127594	-0.133038	0.250056	0.348363		-0.0544522	-0.0536135	-0.0954967	-0.110651	0	66	40	54	47
Q3UE37	Q3UE37	Ubiquitin-conjugating enzyme E2 Z	Ube2z	-1.88573	-0.799918	-1.09868	-0.262606		-0.919724	-0.35159	0.442121	0.120086	7.4526e-36	9	4	17	10
Q3UEB3-2;Q3UEB3-3;Q3UEB3	Q3UEB3-2;Q3UEB3-3;Q3UEB3	Poly(U)-binding-splicing factor PUF60	Puf60	-0.160687	-0.366719	-0.0905238	-0.300033		-0.0707392	-0.158027	0.0402613	0.134221	0	36	19	48	27
Q9Z1R2;Q3UF95;G3UZT6;G3UYQ2;Q3TDL4;G3UXT8;G3V013;G3UYZ0	Q9Z1R2;Q3UF95;G3UZT6;G3UYQ2;Q3TDL4	Large proline-rich protein BAG6	Bag6	-1.1461	-1.39345	-1.11728	-1.08568		-0.555715	-0.616791	0.449535	0.430927	0	41	43	66	55
Q3UFB2;Q3UFB2-2	Q3UFB2;Q3UFB2-2	Box C/D snoRNA protein 1	Znhit6	-0.53945	#VALUE!	0.137477	3.13029		-0.257149	NaN	-0.0506219	-1.16127	9.6936e-25	1	0	2	1
Q3UFK8;D3Z5B2	Q3UFK8;D3Z5B2	FERM domain-containing protein 8	Frmd8	#VALUE!	-0.417918	-0.883836	-0.0217758		NaN	-0.180904	0.356482	0.0291349	9.5076e-06	0	1	2	1
Q3UFY7;Q3UFY7-2;Q3UFY7-3	Q3UFY7;Q3UFY7-2	Cytosolic 5-nucleotidase III-like protein	Nt5c3l	-0.7213	0.231253	-0.0615462	0.584076		-0.346646	0.10916	0.0287105	-0.199669	7.9489e-158	17	12	22	15
Q3UFY8	Q3UFY8	Mitochondrial ribonuclease P protein 1	Rg9mtd1	#VALUE!	-1.65863	-0.614549	-0.345016		NaN	-0.735283	0.249142	0.151209	8.8519e-29	0	1	4	1
Q9Z2V5;Q3UG37;B1AUA8	Q9Z2V5;Q3UG37	Histone deacetylase 6	Hdac6	-1.82215	-1.9564	-1.5365	-1.86227		-0.888434	-0.868332	0.61664	0.724214	1.2267e-89	8	4	11	5
Q3UGB5;Q9JII5;Q9JII5-2;D3Z4J1	Q3UGB5;Q9JII5;Q9JII5-2;D3Z4J1	DAZ-associated protein 1	Dazap1	0.270688	0.283809	0.363375	0.183482		0.141564	0.132643	-0.140666	-0.0483824	1.3878e-117	10	14	11	11
Q3UGR5;Q3UGR5-2;D3YZI3;D3YUN7	Q3UGR5	Haloacid dehalogenase-like hydrolase domain-containing protein 2	Hdhd2	-0.814964	-1.12357	-0.367559	-0.379944		-0.392743	-0.496203	0.15069	0.1644	3.1077e-188	16	8	17	8
Q3UHC1;Q3UGX8;Q91ZZ2;E0CXV1;F6ZDE5	Q3UHC1;Q3UGX8;Q91ZZ2;E0CXV1		Rapgef1	0.397584	-1.83074	-1.12813	-1.54792		0.204016	-0.812182	0.45386	0.605494	7.5846e-33	2	1	4	1
Q3UH59;Q61879;Q5SV64;Q8BXF2	Q3UH59;Q61879;Q5SV64	Myosin-10	Myh10	0.947102	0.589053	0.971426	-0.35292		0.474462	0.269033	-0.38304	0.154194	0	243	197	252	173
Q3UHB1	Q3UHB1	5-nucleotidase domain-containing protein 3	Nt5dc3	#VALUE!	0.852149	1.41101	1.35894		NaN	0.38659	-0.558262	-0.492302	1.0356e-26	0	8	9	6
Q3UHD6;Q3UHD6-2;E9PW30;D6RE54;F6QKA8	Q3UHD6;Q3UHD6-2;E9PW30	Sorting nexin-27	Snx27	0.300827	#VALUE!	0.61555	1.13818		0.156397	NaN	-0.241185	-0.408933	3.1851e-35	10	0	10	6
Q3UHH1;Q3UHH1-3;Q3UHH1-2;Q3UHH1-5;Q3UHH1-4	Q3UHH1;Q3UHH1-3;Q3UHH1-2	Zinc finger SWIM domain-containing protein KIAA0913	Kiaa0913	-1.96686	-1.44611	0.414124	0.120716		-0.959655	-0.640321	-0.160895	-0.0246781	6.3578e-101	2	2	7	6
Q3UHJ0;Q3UHJ0-2;Q91Z96-2	Q3UHJ0;Q3UHJ0-2	AP2-associated protein kinase 1	Aak1	-2.51011	-3.1359	-2.03455	-2.7464	Down	-1.22702	-1.39536	0.815166	1.05811	0	12	13	12	7
Q3UHU5;Q3UHU5-3;H3BL83;B8JJI7;Q3UHU5-2	Q3UHU5;Q3UHU5-3;H3BL83;B8JJI7;Q3UHU5-2	Coiled-coil domain-containing protein 165	Ccdc165;1110012J17Rik	3.94003	3.78283	3.02101	#VALUE!	Up	1.94744	1.69608	-1.20002	#VALUE!	2.2354e-18	1	2	1	0
Q3UHU8;Q9ESZ8;Q9ESZ8-2;Q9ESZ8-6;Q9ESZ8-3;Q9ESZ8-4;Q9ESZ8-5;G3UYD0;G3UYJ6;G3UWV2;G3UZU4;G3UYD7;G3UX27	Q3UHU8;Q9ESZ8;Q9ESZ8-2;Q9ESZ8-6;Q9ESZ8-3;Q9ESZ8-4;Q9ESZ8-5;G3UYD0	General transcription factor II-I	Gtf2i	-1.6004	-1.44731	-1.63316	-1.71855		-0.779299	-0.640861	0.655169	0.669934	1.0672e-156	18	27	22	21
Q3UHX2	Q3UHX2	28 kDa heat- and acid-stable phosphoprotein	Pdap1	-0.725031	-0.790456	-0.373748	-0.265065		-0.348482	-0.347362	0.153157	0.121015	0	35	47	44	41
Q3UHZ7;Q91YN5;Q91YN5-3;Q91YN5-2	Q3UHZ7;Q91YN5;Q91YN5-3;Q91YN5-2	UDP-N-acetylhexosamine pyrophosphorylase;UDP-N-acetylgalactosamine pyrophosphorylase;UDP-N-acetylglucosamine pyrophosphorylase	Uap1	1.2118	1.02666	-0.576898	-0.567837		0.604736	0.464564	0.234133	0.235359	4.4846e-174	21	9	31	18
Q3UI84;Q99J62;D6RGM1;D3Z7I8	Q3UI84;Q99J62	Replication factor C subunit 4	Rfc4	-0.461462	0.106437	-0.688401	-0.465559		-0.218766	0.0533895	0.27858	0.196733	1.7672e-43	6	6	14	8
Q6PDG5;Q3UID0;Q6PDG5-2	Q6PDG5;Q3UID0;Q6PDG5-2	SWI/SNF complex subunit SMARCC2	Smarcc2	1.96094	1.86969	1.72016	0.948271		0.973428	0.841249	-0.681492	-0.337211	0	9	7	17	7
Q3UIR3;Q3UIR3-2	Q3UIR3;Q3UIR3-2	E3 ubiquitin-protein ligase DTX3L	Dtx3l	0.124395	-2.32502	-3.82303	-3.54853		0.0695647	-1.03304	1.52807	1.36104	2.5052e-85	2	1	5	3
Q3UIU2;A2AP32	Q3UIU2;A2AP32	NADH dehydrogenase [ubiquinone] 1 beta subcomplex subunit 6	Ndufb6	0.449043	0.764528	-0.989147	-0.974996		0.229342	0.347439	0.39846	0.389126	9.2339e-12	6	4	16	4
Q3UJB0	Q3UJB0		Sf3b2	-0.3762	-0.757029	-0.563022	-0.550599		-0.176805	-0.332426	0.228603	0.228849	1.937e-158	39	26	47	25
Q3UKC1;D3Z213;D3Z715	Q3UKC1	Tax1-binding protein 1 homolog	Tax1bp1	2.62201	-1.18309	2.15535	0.15342		1.29878	-0.522799	-0.854962	-0.0370291	4.0322e-64	3	2	1	2
Q3UKJ7;Q3UKJ7-2	Q3UKJ7;Q3UKJ7-2	WD40 repeat-containing protein SMU1	Smu1	-0.245393	0.0556331	-1.21326	-0.87391		-0.112428	0.0306892	0.487795	0.35095	1.7937e-20	7	5	4	5
Q3UKU1	Q3UKU1	RNA polymerase II elongation factor ELL2	Ell2	0.262439	0.39582	#VALUE!	-1.03117		0.137504	0.182692	#VALUE!	0.410341	1.149e-06	4	1	0	2
Q3UL36;Q3UL36-2	Q3UL36;Q3UL36-2	Arginine and glutamate-rich protein 1	Arglu1	-0.250501	#VALUE!	0.135341	0.0226579		-0.114941	NaN	-0.0497705	0.0123541	7.1656e-11	1	0	6	1
Q921W7;Q3ULB1;P47226;P47226-2;D6RH72;A2ALC6;B1AXB9	Q921W7;Q3ULB1;P47226;P47226-2	Testin	Tes	0.400128	-0.0360237	0.370364	0.168579		0.205267	-0.0102651	-0.143452	-0.042754	1.7982e-127	9	11	23	6
Q3ULJ0;Q3ULJ0-2;D3Z0L6;P13707;E0CXN5	Q3ULJ0;Q3ULJ0-2	Glycerol-3-phosphate dehydrogenase 1-like protein	Gpd1l	1.46732	0.567277	1.98915	2.02791		0.730488	0.259303	-0.788714	-0.744947	4.5036e-94	13	4	18	7
Q3ULW8;Q8CFB8;E9PX17;E9Q992	Q3ULW8;Q8CFB8		Parp3	0.0347668	-0.0729474	-0.593475	-0.475544		0.0254541	-0.0267634	0.240742	0.200504	0	19	15	33	20
Q3UM18;Q3UM18-2;F7AMG0;D6RFS1	Q3UM18;Q3UM18-2	Large subunit GTPase 1 homolog	Lsg1	-0.776842	-0.792879	-1.21301	-1.18663		-0.373981	-0.348445	0.487692	0.469052	1.3231e-114	10	14	18	16
Q3UM29	Q3UM29	Conserved oligomeric Golgi complex subunit 7	Cog7	#VALUE!	0.227359	1.13878	1.41524		NaN	0.10742	-0.449749	-0.513564	1.5821e-44	0	2	8	10
Q3UM45;F6TGJ2	Q3UM45	Protein phosphatase 1 regulatory subunit 7	Ppp1r7	-0.896522	-1.10957	-1.42115	-2.01304		-0.432883	-0.489949	0.570657	0.78115	0	10	14	29	10
Q3UMB9	Q3UMB9	WASH complex subunit 7	Kiaa1033	0.686008	0.775421	1.24029	1.14311		0.345964	0.352307	-0.490213	-0.410793	5.2461e-287	13	35	51	33
Q3UMC0;Q9D3R6-3;D6RGM7	Q3UMC0	Spermatogenesis-associated protein 5	Spata5	-0.253104	0.335521	-0.079243	0.0786672		-0.116223	0.155749	0.0357646	-0.00879824	5.2729e-49	7	4	5	6
Q3UMR5;Q3UMR5-2	Q3UMR5;Q3UMR5-2	Calcium uniporter protein, mitochondrial	Mcu	0.679079	0.705883	-0.182958	-0.0501226		0.342555	0.321235	0.0771063	0.0398403	2.3699e-82	14	19	19	10
Q3UMU9-3;Q3UMU9	Q3UMU9-3;Q3UMU9	Hepatoma-derived growth factor-related protein 2	Hdgfrp2	-0.955642	-1.58419	0.607602	0.235946		-0.461978	-0.702022	-0.238017	-0.0681959	0	2	2	4	4
Q3UPH1	Q3UPH1	Protein PRRC1	Prrc1	-1.5748	-1.4047	-0.859443	-1.79014		-0.766701	-0.621821	0.346758	0.696973	1.0346e-117	15	15	23	19
Q3UPH7;Q3UPH7-2;Q3UPH7-6;Q3UPH7-3;Q3UPH7-4;Q3UPH7-5	Q3UPH7;Q3UPH7-2;Q3UPH7-6;Q3UPH7-3;Q3UPH7-4	Rho guanine nucleotide exchange factor 40	Arhgef40	-1.01552	-1.47639	-0.279776	-0.346049		-0.49145	-0.653854	0.115699	0.151599	1.9296e-157	11	5	12	5
Q3UPL0;Q3UPL0-2;Q3UPL0-3	Q3UPL0;Q3UPL0-2	Protein transport protein Sec31A	Sec31a	0.172601	-0.141965	-0.167141	-0.41388		0.0932897	-0.0576018	0.0708015	0.177216	0	184	157	186	195
Q3UQ28;D3Z5M7	Q3UQ28	Peroxidasin homolog	Pxdn	-1.05523	-1.48087	-1.75563	-1.71013		-0.510991	-0.655853	0.703987	0.666757	2.042e-22	4	3	2	9
Q3URE1;Q3URE1-2	Q3URE1	Acyl-CoA synthetase family member 3, mitochondrial	Acsf3	0.84797	#VALUE!	1.94336	1.86786		0.425674	NaN	-0.770461	-0.684503	2.8781e-14	1	0	5	1
Q3URQ0;F6ZZ61	Q3URQ0	Testis-expressed sequence 10 protein	Tex10	0.869278	0.685143	0.996101	1.00359		0.436162	0.311968	-0.392876	-0.358103	9.8466e-87	7	5	12	10
Q3URS9;Q3URS9-2	Q3URS9;Q3URS9-2	Coiled-coil domain-containing protein 51	Ccdc51	-0.348662	-0.800701	-0.0926351	-0.850775		-0.163252	-0.35194	0.0411028	0.342213	2.8812e-22	1	2	5	1
Q3UUW5;Q61458;E9PWD3;F7D1U6;E9QA43	Q3UUW5;Q61458;E9PWD3	Cyclin-H	Ccnh	-1.22927	#VALUE!	-1.90621	-2.06251		-0.596645	NaN	0.764006	0.799833	3.72e-41	3	0	8	4
Q3UUY6;Q3UUY6-2	Q3UUY6;Q3UUY6-2	Prominin-2	Prom2	-1.03384	-1.24387	-1.35846	-1.04122		-0.500463	-0.549958	0.545672	0.414136	8.1734e-07	1	3	4	2
Q3UVG3	Q3UVG3	Protein FAM91A1	Fam91a1	0.986291	-0.685224	1.23897	1.14214		0.49375	-0.300342	-0.489686	-0.410428	5.6386e-79	4	4	15	13
Q3UVK0;F6TQS9;Q3UVK0-2;G8JL46	Q3UVK0	Endoplasmic reticulum metallopeptidase 1	Ermp1	-4.07418	-3.66992	-4.50979	-3.47571	Down	-1.99677	-1.63397	1.80182	1.33354	9.8629e-41	9	25	11	12
Q3UVL4;Q3UVL4-2;F6TKZ2;Q3UVL4-3;E0CX85	Q3UVL4;Q3UVL4-2	Protein fat-free homolog	Ffr	-0.297219	-0.533993	-0.292448	-0.00338687		-0.137934	-0.232769	0.12075	0.0221902	8.4277e-50	2	5	12	9
Q3UW53;E9PYV4;D3Z233;D3YYZ9	Q3UW53;E9PYV4	Protein Niban	Fam129a	1.15909	0.972624	1.85565	1.52842		0.578794	0.440421	-0.7355	-0.556309	0	59	53	74	72
Q3UW66;Q99J99	Q3UW66;Q99J99	Sulfurtransferase;3-mercaptopyruvate sulfurtransferase	Mpst	2.06521	1.99777	2.90481	2.79576		1.02475	0.898479	-1.1537	-1.03493	3.4833e-271	25	19	31	22
Q99MZ7;Q3UXD9;D6RHN4;D6RIP0	Q99MZ7;Q3UXD9	Peroxisomal trans-2-enoyl-CoA reductase	Pecr	0.136382	-0.239355	-0.208258	0.363117		0.0754641	-0.101118	0.0871912	-0.116223	2.1349e-96	7	1	8	3
Q62447;Q8CAS3;Q3UXL9	Q62447;Q8CAS3;Q3UXL9	Cyclin-C	Ccnc	0.135269	0.25838	-0.17265	0.621062		0.0749164	0.121281	0.0729976	-0.213638	6.5134e-13	1	2	3	4
Q3UYV9	Q3UYV9	Nuclear cap-binding protein subunit 1	Ncbp1	-0.37236	-0.354349	-0.497567	-0.504689		-0.174915	-0.1525	0.202512	0.211511	3.7453e-266	36	31	56	51
Q3UZ39;Q3UZ39-3	Q3UZ39;Q3UZ39-3	Leucine-rich repeat flightless-interacting protein 1	Lrrfip1	-2.64692	-2.67706	-2.07831	-1.35032		-1.29435	-1.19034	0.832606	0.53087	0	26	12	13	6
Q3V009;Q3V009-2	Q3V009;Q3V009-2	Transmembrane emp24 domain-containing protein 1	Tmed1	1.00538	0.701747	-0.613026	0.500413		0.503145	0.319387	0.248535	-0.168074	1.2944e-34	9	5	13	6
Q3V117;Q91V92;Q3TS02	Q3V117;Q91V92	ATP-citrate synthase	Acly	1.84414	1.77997	0.806143	0.805332		0.915942	0.801159	-0.317157	-0.283229	0	205	149	255	221
Q3V1V3	Q3V1V3	ESF1 homolog	Esf1	-2.85773	-2.93712	-2.53891	-0.861608	Down	-1.39809	-1.30654	1.01621	0.346304	9.6514e-68	6	5	6	2
Q3V1Z5	Q3V1Z5		Rps4y2	9.65982	8.37468	7.63826	12.2635	Up	4.76245	3.74782	-3.0405	-4.61049	0	5	2	2	1
Q3V3R1	Q3V3R1	Monofunctional C1-tetrahydrofolate synthase, mitochondrial	Mthfd1l	0.764067	0.832329	0.324128	0.343334		0.384381	0.377735	-0.125022	-0.108752	0	105	67	140	144
Q3V4B5;B7ZNP3	Q3V4B5;B7ZNP3	COMM domain-containing protein 6	Commd6	#VALUE!	0.0362945	14.4434	0.458454		NaN	0.0220482	-5.75306	-0.152227	9.5748e-14	0	1	1	3
Q3V4D5;B1AUZ1;B1AUY9	Q3V4D5;B1AUZ1;B1AUY9		Naa10	-0.064175	-0.0925118	0.374205	0.383461		-0.0232405	-0.0355052	-0.144983	-0.123906	1.37e-43	4	4	6	2
Q45VK7-2;Q45VK7;D3Z025;F6QLS2	Q45VK7-2;Q45VK7	Cytoplasmic dynein 2 heavy chain 1	Dync2h1	-0.764181	0.2045	0.420278	-0.169385		-0.36775	0.0972062	-0.163349	0.0848807	1.1886e-18	7	3	8	2
Q499X9	Q499X9	Methionine--tRNA ligase, mitochondrial	Mars2	-0.226157	1.20309	-0.161278	0.284596		-0.102961	0.543397	0.0684644	-0.0865686	3.7636e-06	2	2	2	2
Q4LDD4;Q4LDD4-2;Q4LDD4-3;F6XBJ8;E9PUB0;D3Z2S2;D3YZJ7	Q4LDD4;Q4LDD4-2;Q4LDD4-3;F6XBJ8;E9PUB0	Arf-GAP with Rho-GAP domain, ANK repeat and PH domain-containing protein 1	Arap1	-0.0889154	-0.038789	0.200779	0.178784		-0.0354165	-0.0115007	-0.0758545	-0.0466081	1.3995e-67	5	9	10	19
Q4PJX1;Q4PJX1-3;Q4PJX1-2	Q4PJX1;Q4PJX1-3;Q4PJX1-2	Protein odr-4 homolog	Odr4	1.44871	#VALUE!	1.69627	1.66474		0.721329	NaN	-0.671968	-0.607793	1.2369e-09	6	0	2	1
Q4PZA2;Q4PZA2-4;Q4PZA2-2;Q4PZA2-3;B1AXF8	Q4PZA2;Q4PZA2-4;Q4PZA2-2;Q4PZA2-3	Endothelin-converting enzyme 1	Ece1	3.36147	3.2028	2.20837	2.88534	Up	1.66271	1.43691	-0.876096	-1.06876	2.5837e-105	25	19	26	15
Q4U2R1;Q4U2R1-2	Q4U2R1;Q4U2R1-2	E3 ubiquitin-protein ligase HERC2	Herc2	-0.14941	-0.587283	-0.683923	0.459302		-0.0651891	-0.25658	0.276794	-0.152548	1.8699e-35	2	2	8	8
Q4VA93;P20444;Q3TQ39	Q4VA93;P20444	Protein kinase C;Protein kinase C alpha type	Prkca	-0.169784	0.255113	-0.265386	-0.588228		-0.075216	0.119821	0.109962	0.24306	3.4099e-21	6	5	7	5
Q4VAA2;Q4VAA2-2;F8WGL9	Q4VAA2;Q4VAA2-2	Protein CDV3	Cdv3	-1.42248	-1.57329	0.679989	-0.181612		-0.691732	-0.697149	-0.266871	0.0894982	0	26	19	36	13
Q4VAE3	Q4VAE3	Transmembrane protein 65	Tmem65	3.38206	3.61061	3.23262	3.54922	Up	1.67283	1.61913	-1.28437	-1.31948	7.4452e-11	4	2	8	2
Q4VBE8	Q4VBE8	WD repeat-containing protein 18	Wdr18	1.1118	1.09724	1.37711	0.984542		0.555522	0.496104	-0.54475	-0.350909	2.1611e-62	9	13	11	6
Q4VC33-2;Q4VC33	Q4VC33-2;Q4VC33	Macrophage erythroblast attacher	Maea	0.599405	0.288222	0.12737	-2.8162		0.303342	0.134615	-0.0465932	1.08447	1.3808e-14	4	1	3	2
Q501J2	Q501J2	Protein FAM173A	Fam173a	1.78418	#VALUE!	1.61862	1.57164		0.886433	NaN	-0.641019	-0.57263	1.2621e-07	2	0	4	2
Q505D1	Q505D1	Serine/threonine-protein phosphatase 6 regulatory ankyrin repeat subunit A	Ankrd28	0.143606	#VALUE!	0.444028	0.749811		0.0790197	NaN	-0.172815	-0.262261	2.9517e-11	3	0	1	1
Q505D7	Q505D7	Optic atrophy 3 protein homolog	Opa3	0.0617158	0.663745	-0.127642	-0.354636		0.0387171	0.302407	0.0550568	0.154842	9.5913e-25	3	4	6	4
Q505F1;Q505F1-2	Q505F1;Q505F1-2	Nuclear receptor subfamily 2 group C member 1	Nr2c1	#VALUE!	-2.06989	-1.57174	-2.37642		NaN	-0.919042	0.630685	0.918386	2.7221e-26	0	2	1	2
E9PV22;Q505F5;F6Z4L9;F6YT33	E9PV22;Q505F5	Leucine-rich repeat-containing protein 47	Lrrc47	-0.595618	-0.793085	-0.123459	-0.184483		-0.284792	-0.348537	0.0533895	0.0905825	1.6239e-251	33	20	32	19
Q52KC3;P49718	Q52KC3;P49718	DNA replication licensing factor MCM5	Mcm5	-0.715119	-0.439034	-0.588877	-0.428043		-0.343604	-0.190339	0.238909	0.182565	0	89	35	91	58
Q52KR3;Q52KR3-6;Q52KR3-2;Q52KR3-3;Q52KR3-4;Q52KR3-5	Q52KR3;Q52KR3-6	Protein prune homolog 2	Prune2	5.12127	#VALUE!	5.88109	-0.469557		2.5288	NaN	-2.34008	0.198243	1.2043e-157	2	0	1	1
Q561M1;Q9D358-2	Q561M1;Q9D358-2		Acp1	#VALUE!	-4.06468	-3.72767	-3.49083	Down	NaN	-1.81036	1.49006	1.33925	0	0	3	4	2
Q569Z5;F8WHR6;Q569Z5-2	Q569Z5;F8WHR6;Q569Z5-2	Probable ATP-dependent RNA helicase DDX46	Ddx46	0.0571461	-0.133575	-0.174714	-0.491799		0.0364681	-0.0538531	0.0738202	0.206643	0	23	37	53	45
Q569Z6;Q8BZN7;F6YSQ2;F7AB07;F6YH92	Q569Z6;Q8BZN7	Thyroid hormone receptor-associated protein 3	Thrap3	0.244798	0.22286	-0.228982	-0.240397		0.128821	0.10541	0.0954519	0.111699	4.8662e-283	4	11	12	7
Q571I9;D3Z0B9;F6RQF0	Q571I9;D3Z0B9	Aldehyde dehydrogenase family 16 member A1	Aldh16a1	-2.94666	-2.90787	-3.26027	-3.26859	Down	-1.44187	-1.29347	1.30375	1.25532	8.7057e-186	7	19	22	18
Q58A65-2;Q58A65;Q58A65-5;F6SH61	Q58A65-2;Q58A65;Q58A65-5;F6SH61	C-Jun-amino-terminal kinase-interacting protein 4	Spag9	-0.425219	-0.404076	1.1201	0.388709		-0.200929	-0.174719	-0.442301	-0.125888	3.878e-224	11	17	32	15
Q58NB6	Q58NB6	Dehydrogenase/reductase SDR family member 9	Dhrs9	1.68024	1.315	1.06383	1.09501		0.835277	0.593402	-0.419874	-0.392629	1.7652e-45	14	13	12	8
Q59J78	Q59J78	Mimitin, mitochondrial	Ndufaf2	0.567639	0.641412	0.448927	0.219441		0.287709	0.292428	-0.174768	-0.0619626	3.1908e-123	15	14	19	22
Q5DTM8;A2AIR2;Q5DTM8-2;A2AIR0;A2AIR1	Q5DTM8;A2AIR2;Q5DTM8-2	E3 ubiquitin-protein ligase BRE1A	Rnf20	0.457285	0.365812	-0.397754	-0.49213		0.233397	0.169284	0.162726	0.206768	1.3911e-250	9	12	16	5
Q5DU37;Q5DU37-2;Q5DU37-3	Q5DU37;Q5DU37-2	Zinc finger FYVE domain-containing protein 26	Zfyve26	#VALUE!	-0.522291	-1.27189	-0.419281		NaN	-0.22754	0.511164	0.179256	3.8713e-12	0	1	2	2
Q5EBG8	Q5EBG8	Uncharacterized protein C1orf50 homolog		0.512613	1.94186	0.04927	-0.645891		0.260628	0.873498	-0.0154617	0.264837	9.9966e-10	4	1	1	3
Q5EG47	Q5EG47	5-AMP-activated protein kinase catalytic subunit alpha-1	Prkaa1	-0.792955	-0.60523	-0.681231	-0.432418		-0.381912	-0.264599	0.275722	0.184217	1.7994e-152	27	15	20	15
Q68FF6;Q5F258;D3Z409	Q68FF6;Q5F258	ARF GTPase-activating protein GIT1	Git1	-0.352703	-0.182951	0.335751	0.0665798		-0.16524	-0.0759153	-0.129655	-0.00423333	7.6098e-50	2	2	7	3
Q5F2E7;Q5F2E7-2	Q5F2E7;Q5F2E7-2	Nuclear fragile X mental retardation-interacting protein 2	Nufip2	-2.51505	#VALUE!	-1.34306	-1.13299		-1.22945	NaN	0.539531	0.448795	2.2864e-274	4	0	4	1
Q5F2E8	Q5F2E8	Serine/threonine-protein kinase TAO1	Taok1	0.842728	0.413126	1.14838	1.11452		0.423094	0.190425	-0.453577	-0.399997	2.2319e-49	7	8	13	5
Q5FWI3	Q5FWI3	Transmembrane protein 2	Tmem2	#VALUE!	-1.46402	-1.54263	-1.41065		NaN	-0.648327	0.619084	0.553655	6.1732e-42	0	1	3	3
A2AH25;Q5FWK3	A2AH25;Q5FWK3	Rho GTPase-activating protein 1	Arhgap1	-0.79242	-0.812178	-0.733176	-0.771921		-0.381649	-0.357067	0.296428	0.312433	1.1422e-262	44	49	29	25
Q5FWX6;Q8K1Y2;D3Z6I0;D3YU02;B1AU43;Q8BLF2;F2Z3Z6;Q8BLF2-2;Q8BLF2-8;Q8BLF2-7;Q8BLF2-5;Q8BLF2-6;Q8BLF2-4;B1AU42	Q5FWX6;Q8K1Y2;D3Z6I0	Serine/threonine-protein kinase D3	Prkd3	-2.04979	#VALUE!	-0.355803	-0.602402		-1.00046	NaN	0.146003	0.248413	1.9193e-257	1	0	3	3
Q5H8C4;Q5H8C4-2	Q5H8C4;Q5H8C4-2	Vacuolar protein sorting-associated protein 13A	Vps13a	-0.917889	-0.573427	-0.49127	0.192539		-0.443399	-0.250389	0.200002	-0.0518029	1.4304e-81	16	7	28	7
Q5I012;Q5I012-2;J3QNE8;Q5I012-3;Q5I012-4	Q5I012;Q5I012-2;J3QNE8;Q5I012-3;Q5I012-4	Putative sodium-coupled neutral amino acid transporter 10	Slc38a10	3.6585	3.66656	3.80043	3.41987	Up	1.80888	1.64413	-1.5107	-1.27063	6.508e-91	7	2	3	2
Q5M8N0;F7C0H6	Q5M8N0;F7C0H6	CB1 cannabinoid receptor-interacting protein 1	Cnrip1	7.68865	3.39605	9.32204	#VALUE!	Up	3.79233	1.52326	-3.71166	#VALUE!	1.4864e-37	2	1	4	0
Q5NC05	Q5NC05	Transcription termination factor 2	Ttf2	1.01509	1.05554	-2.11832	1.03052		0.507922	0.47747	0.848558	-0.368272	7.1678e-10	2	4	1	1
Q5NCF2;B1ASW5;B1ASW6	Q5NCF2;B1ASW5;B1ASW6	Trafficking protein particle complex subunit 1	Trappc1	0.569079	0.616534	1.07091	1.12335		0.288418	0.281312	-0.422695	-0.403332	6.4948e-52	5	2	18	6
Q5PPR2;Q6P1Y9;Q8R3S6;G3UVW9	Q5PPR2;Q6P1Y9;Q8R3S6	Exocyst complex component 1	Exoc1	0.241041	0.36983	0.596265	0.35315		0.126973	0.171079	-0.233498	-0.112459	8.0658e-103	3	2	8	8
Q5PRF0;Q5PRF0-2	Q5PRF0	HEAT repeat-containing protein 5A	Heatr5a	0.708524	0.27496	1.17835	0.989514		0.357045	0.128689	-0.46552	-0.352787	3.586e-151	7	22	43	23
Q5RL20;Q99N89	Q5RL20;Q99N89	39S ribosomal protein L43, mitochondrial	Mrpl43	1.35274	1.63985	0.879847	0.64372		0.674099	0.738552	-0.346536	-0.222195	5.4326e-26	9	10	10	7
Q5RL79	Q5RL79	Keratinocyte-associated protein 2	Krtcap2	1.46431	1.79807	0.621716	0.919904		0.729009	0.80925	-0.243643	-0.326498	6.4656e-114	2	3	2	4
Q5S006	Q5S006	Leucine-rich repeat serine/threonine-protein kinase 2	Lrrk2	1.81368	1.85904	2.43168	2.59926		0.900954	0.83649	-0.965108	-0.960721	7.8855e-61	1	9	18	8
Q5SF07;Q5SF07-2;A6X8Z3	Q5SF07;Q5SF07-2;A6X8Z3	Insulin-like growth factor 2 mRNA-binding protein 2	Igf2bp2	-1.74662	-1.83119	-1.9094	-1.69639		-0.851261	-0.812384	0.76528	0.661567	3.4833e-86	19	6	9	10
Q5SFM8;Q5SFM8-2;Q5SFM8-3	Q5SFM8;Q5SFM8-2;Q5SFM8-3	RNA-binding protein 27	Rbm27	-3.71283	-3.51431	-3.20816	-4.34997	Down	-1.81894	-1.56444	1.28297	1.66371	3.2331e-19	1	2	2	1
Q5SQ20;Q9EQ61	Q5SQ20;Q9EQ61	Pescadillo homolog	Pes1	-0.420471	0.315752	-0.38869	-0.0490073		-0.198593	0.146916	0.159113	0.0394191	3.098e-38	12	5	24	12
Q5SQX6;F6QD74	Q5SQX6;F6QD74	Cytoplasmic FMR1-interacting protein 2	Cyfip2	0.62	0.235143	0.0606285	-0.185559		0.313478	0.110898	-0.0199892	0.0909888	1.2338e-179	3	2	6	5
Q5SS83;Q60634;Q60634-2;Q60634-3	Q5SS83;Q60634;Q60634-2;Q60634-3	Flotillin-2	Flot2	2.20834	1.06018	1.71233	3.40708		1.09518	0.479541	-0.678372	-1.2658	1.9944e-15	2	2	4	2
Q5SSW2;F6R7K9;Q5SSW2-2;Q5SSW0	Q5SSW2	Proteasome activator complex subunit 4	Psme4	-2.51637	-2.59587	-2.67862	-2.57011	Down	-1.23009	-1.15406	1.0719	0.991535	4.3662e-129	26	11	38	20
Q5SSZ5	Q5SSZ5	Tensin-3	Tns3	-1.85237	-2.94753	1.65527	#VALUE!		-0.903306	-1.31118	-0.655626	#VALUE!	2.0244e-37	1	1	1	0
Q5SUF2;Q5SUF2-2;Q5SUF2-3;F8WGA8	Q5SUF2;Q5SUF2-2;Q5SUF2-3	Luc7-like protein 3	Luc7l3	0.372795	0.464218	0.416065	-0.0359751		0.191815	0.213254	-0.161669	0.0344974	0	19	7	18	4
Q5SUH7;Q5SUH6;Q99KN9;Q99KN9-2	Q5SUH7;Q5SUH6;Q99KN9;Q99KN9-2	Clathrin interactor 1	Clint1	-2.58172	-1.75194	-2.07383	-2.59195		-1.26226	-0.776973	0.830823	0.999784	1.0461e-187	22	14	30	13
Q5SUR0;F6RUL9;G3UY86	Q5SUR0	Phosphoribosylformylglycinamidine synthase	Pfas	-0.475003	-0.581386	0.245573	0.15244		-0.22543	-0.253945	-0.0937096	-0.0366591	0	73	82	111	90
Q5SUS9;Q61545;Q5SUT0;Q5SUS8	Q5SUS9;Q61545;Q5SUT0	RNA-binding protein EWS	Ewsr1	-1.46171	-0.91128	0.0386033	-0.176582		-0.711039	-0.401349	-0.0112098	0.0875986	5.2789e-72	6	5	8	6
Q60760;Q60760-2;Q5SUW3;Q60760-3;Q5SUW0;B1ATS7;B1ATS8	Q60760;Q60760-2;Q5SUW3;Q60760-3	Growth factor receptor-bound protein 10	Grb10	3.01569	5.89098	6.10309	5.98497	Up	1.49252	2.63805	-2.42857	-2.23936	2e-74	9	11	20	10
Q5SVG4;Q5SVG5	Q5SVG4;Q5SVG5		Ap1b1	0.00320402	0.200574	0.807089	0.751553		0.00992034	0.0954519	-0.317535	-0.262919	0	48	29	39	39
Q5SVT2;Q99PP9;Q5SVT1;Q99PP9-2;Q99PP9-3	Q5SVT2;Q99PP9;Q5SVT1;Q99PP9-2;Q99PP9-3	Tripartite motif-containing protein 16	Trim16	1.26396	1.85578	1.93448	2.29436		0.630405	0.835035	-0.766922	-0.845572	1.6372e-09	2	1	4	1
Q5SW15;Q9CQG2;Q9CQG2-2;F8WHZ7	Q5SW15;Q9CQG2;Q9CQG2-2	Methyltransferase-like protein 16	Mettl16	-0.291836	#VALUE!	0.309199	-0.219125		-0.135285	NaN	-0.119072	0.103665	4.3962e-21	6	0	4	3
Q5SW19;Q5SW19-3;Q5SW19-2	Q5SW19;Q5SW19-3;Q5SW19-2	Protein KIAA0664	Kiaa0664	-0.681353	-0.825646	-0.611197	-0.749707		-0.326986	-0.363085	0.247806	0.304044	0	41	56	74	55
Q5SW88;Q5SW87;Q5SW86	Q5SW88;Q5SW87;Q5SW86		Rab1	1.55092	1.87689	1.4219	1.30245		0.771632	0.844466	-0.562602	-0.470969	0	9	1	4	5
Q5SWD9;Q5SWD9-2;Q5SWD9-3	Q5SWD9;Q5SWD9-2;Q5SWD9-3	Pre-rRNA-processing protein TSR1 homolog	Tsr1	0.740392	0.970957	1.53196	1.52831		0.372729	0.439676	-0.606474	-0.556266	8.5302e-230	16	9	17	16
Q5SWN2;Q8VEE4	Q5SWN2;Q8VEE4	Replication protein A 70 kDa DNA-binding subunit	Rpa1	0.777063	0.575898	0.659319	0.64546		0.390778	0.263155	-0.258632	-0.222852	8.1172e-242	29	13	31	21
Q5SWU9-2;Q5SWU9;D3Z0B3	Q5SWU9-2;Q5SWU9	Acetyl-CoA carboxylase 1;Biotin carboxylase	Acaca	-0.546326	0.0219534	-0.336782	-1.13607		-0.260532	0.0156403	0.138421	0.449958	0	134	137	165	131
Q5SXC4;Q5SXC3	Q5SXC4;Q5SXC3		Vezf1	0.877069	0.80563	1.29005	1.58997		0.439995	0.365804	-0.510046	-0.579555	3.229e-10	4	4	8	5
Q5SXR6;Q68FD5;F6Z1R4	Q5SXR6;Q68FD5	Clathrin heavy chain 1	Cltc	0.681853	0.131851	0.992253	0.761191		0.343919	0.0647449	-0.391342	-0.266559	0	408	745	565	404
Q5SXY1-3	Q5SXY1-3			-0.890434	#VALUE!	-1.76606	-0.99884		-0.429887	NaN	0.708143	0.398132	1.3914e-266	4	0	8	4
Q5SYD0;Q5SYD0-2;Q5SUA5	Q5SYD0;Q5SYD0-2	Unconventional myosin-Id	Myo1d	5.54576	5.32295	3.514	3.16021	Up	2.73771	2.38424	-1.39654	-1.17257	1.9659e-113	16	5	27	21
Q5SYH2	Q5SYH2	Transmembrane protein 199	Tmem199	1.21893	1.15847	0.490632	-0.63602		0.608241	0.523462	-0.191393	0.26111	1.9299e-135	4	7	10	3
Q5U3K5	Q5U3K5	Rab-like protein 1	Parf	-1.5522	-1.86167	-1.1858	-1.23108		-0.755576	-0.826003	0.476848	0.485839	4.1081e-98	2	2	2	2
Q5U430;Q5U430-3;F6QC57;F6RDS0;A2AV05	Q5U430;Q5U430-3;F6QC57	E3 ubiquitin-protein ligase UBR3	Ubr3	#VALUE!	-0.847521	0.108208	-1.39997		NaN	-0.37286	-0.0389546	0.54962	8.0221e-13	0	4	7	3
Q5U5I3;Q99N85;D3Z603	Q5U5I3;Q99N85;D3Z603	28S ribosomal protein S18a, mitochondrial	Mrps18a	0.465252	#VALUE!	1.05571	1.27202		0.237319	NaN	-0.416635	-0.459477	3.8191e-12	4	0	9	1
Q5XJF6;P53026;D6RE43	Q5XJF6;P53026	Ribosomal protein;60S ribosomal protein L10a	Rpl10a	0.124395	0.189676	-0.00937076	0.0645115		0.0695647	0.0905825	0.007913	-0.0034522	0	63	65	74	58
Q5XJY5	Q5XJY5	Coatomer subunit delta	Arcn1	0.94013	0.798105	1.3012	1.16148		0.471031	0.362442	-0.514491	-0.417733	0	65	55	116	55
Q5XKN4	Q5XKN4	Protein jagunal homolog 1	Jagn1	0.594413	0.62635	0.06702	0.345312		0.300885	0.285698	-0.022537	-0.109499	7.8231e-31	7	4	10	5
Q60520-1;Q60520;E9PXF9	Q60520-1;Q60520	Paired amphipathic helix protein Sin3a	Sin3a	-0.582542	-0.776479	-0.516703	-0.221968		-0.278356	-0.341117	0.21014	0.104739	4.0722e-84	13	14	22	5
Q60575;Q60575-2;F6XNB6	Q60575;Q60575-2	Kinesin-like protein KIF1B	Kif1b	-0.223861	0.163798	-0.198023	-0.143001		-0.10183	0.0790197	0.0831112	0.0749165	2.2962e-31	1	4	5	4
Q60596	Q60596	DNA repair protein XRCC1	Xrcc1	#VALUE!	0.231553	-0.849469	-1.15337		NaN	0.109294	0.342782	0.456491	1.5766e-08	0	1	2	2
Q60597;Q60597-4;Q60597-2;Q5SVY0;Q5SVY1	Q60597;Q60597-4;Q60597-2	2-oxoglutarate dehydrogenase, mitochondrial	Ogdh	2.22571	2.20035	2.39792	2.31432		1.10373	0.988994	-0.951652	-0.85311	0	105	37	90	78
Q60598;Q921L6	Q60598;Q921L6	Src substrate cortactin	Cttn	-0.159456	-0.589868	0.412546	-0.0760466		-0.0701333	-0.257735	-0.160266	0.0496307	0	45	24	63	36
Q60605-2	Q60605-2			1.83589	2.09368	1.88178	1.86185		0.911883	0.941332	-0.745914	-0.682233	0	27	36	36	48
Q60631;B1AT92;Q60631-2;B1AT95	Q60631;B1AT92;Q60631-2	Growth factor receptor-bound protein 2	Grb2	1.84056	1.49094	1.57983	1.80998		0.914182	0.672018	-0.625556	-0.662643	4.3966e-199	23	28	39	22
Q60648	Q60648	Ganglioside GM2 activator	Gm2a	1.83698	2.35069	3.47469	3.43943		0.91242	1.05617	-1.38086	-1.27802	5.8101e-13	2	2	5	1
Q60649;E9PY58;D3YZF1;D3Z7V2	Q60649;E9PY58	Caseinolytic peptidase B protein homolog	Clpb	0.0125056	#VALUE!	0.349516	1.16154		0.0144981	NaN	-0.135142	-0.417752	4.8958e-22	2	0	11	3
Q60668;Q60668-3;Q60668-2;Q60668-4;F6ZV59;F6SHF3;E9Q5B6;F7A465;Q9D3U4	Q60668;Q60668-3;Q60668-2;Q60668-4;F6ZV59	Heterogeneous nuclear ribonucleoprotein D0	Hnrnpd	0.744689	1.0798	0.872584	0.906704		0.374845	0.488309	-0.343641	-0.321513	0	28	28	42	28
Q60692	Q60692	Proteasome subunit beta type-6	Psmb6	-0.0744705	-0.102422	-0.381227	-0.274539		-0.0283074	-0.0399332	0.156138	0.124593	4.7479e-173	24	20	32	26
F8WJE0;Q60710;E9Q0K6;F6TVP2;E9PYG9;E0CXZ5	F8WJE0;Q60710;E9Q0K6;F6TVP2;E9PYG9	SAM domain and HD domain-containing protein 1	Samhd1	0.619291	0.51369	0.278045	0.217807		0.31313	0.235359	-0.106653	-0.0613453	0	82	64	83	71
Q60715	Q60715	Prolyl 4-hydroxylase subunit alpha-1	P4ha1	2.61677	1.89518	2.309	2.41592		1.29619	0.852638	-0.916208	-0.891482	0	6	5	4	4
Q60715-2;E9Q7B0	Q60715-2;E9Q7B0		P4ha1	0.984417	1.21437	1.08345	1.06619		0.492827	0.548437	-0.427692	-0.381743	0	104	89	130	78
Q60716-2	Q60716-2			1.07467	1.07035	-0.75785	-0.681021		0.537246	0.484087	0.306262	0.278104	0	40	34	54	51
Q60737;A2ANR6;Q6NSS6	Q60737	Casein kinase II subunit alpha	Csnk2a1	-2.24154	-1.58498	-2.21197	-2.34843		-1.09483	-0.702374	0.885887	0.907814	2.2899e-257	21	15	26	17
Q60749;Q9WU01;Q9R226;Q9WU01-2	Q60749	KH domain-containing, RNA-binding, signal transduction-associated protein 1	Khdrbs1	-1.47705	-0.798188	-1.07329	-1.19738		-0.718593	-0.350817	0.431997	0.473112	7.5043e-167	19	15	19	14
Q60759;D3Z4I2	Q60759	Glutaryl-CoA dehydrogenase, mitochondrial	Gcdh	1.21103	-0.734019	1.64712	1.24292		0.604356	-0.322144	-0.65238	-0.448489	2.5528e-31	2	3	12	5
Q60766;Q60766-2;Q5NCB5	Q60766;Q60766-2;Q5NCB5	Immunity-related GTPase family M protein 1	Irgm1	-2.6265	-2.3581	-3.92122	-3.46599	Down	-1.2843	-1.04782	1.5672	1.32987	3.0319e-206	17	15	24	24
Q60770;Q60770-2;E9Q6R9;A2AEC9	Q60770;Q60770-2	Syntaxin-binding protein 3	Stxbp3	1.2719	1.19243	1.55562	1.72317		0.634314	0.538637	-0.615906	-0.629858	1.5493e-29	6	2	8	2
Q60772	Q60772	Cyclin-dependent kinase 4 inhibitor C	Cdkn2c	-1.15508	#VALUE!	-2.48846	-1.93057		-0.560132	NaN	0.9961	0.750006	1.3565e-10	2	0	4	2
Q60790	Q60790	Ras GTPase-activating protein 3	Rasa3	0.776169	1.70024	1.21739	1.02924		0.390338	0.765535	-0.481082	-0.367788	1.8791e-22	1	2	10	7
Q60809;Q3TLK9	Q60809;Q3TLK9	CCR4-NOT transcription complex subunit 7	Cnot7	0.358387	0.160434	1.56918	-0.0385852		0.184725	0.0775164	-0.621311	0.0354831	2.758e-32	7	2	4	3
Q60838;E9Q967;Q61062;E9Q150	Q60838	Segment polarity protein dishevelled homolog DVL-2	Dvl2	-1.87549	-2.26784	-1.828	-0.769765		-0.914684	-1.00749	0.732834	0.311619	4.7624e-22	5	5	8	8
Q60848;Q60848-2;D3Z414	Q60848;Q60848-2	Lymphocyte-specific helicase	Hells	-0.0247903	#VALUE!	-0.348598	-2.42323		-0.00385713	NaN	0.143132	0.936063	5.7245e-13	3	0	3	1
F8WIV2;Q60854;K7E6F1;E9Q0P9;E9Q108;E9Q6X2;E9Q3Y1;E9PYY0;E9Q4R2;E9PZQ9;E9Q5Q5	F8WIV2;Q60854;K7E6F1	Serpin B6	Serpinb6a;Serpinb6	0.0185936	0.301138	-0.255311	0.315182		0.0174944	0.140386	0.105946	-0.0981195	0	90	85	117	110
Q60855;F7D1J2	Q60855;F7D1J2	Receptor-interacting serine/threonine-protein kinase 1	Ripk1	-3.37039	-2.64604	#VALUE!	1.50043		-1.65041	-1.17648	#VALUE!	-0.54574	7.7213e-16	1	2	0	1
Q60864	Q60864	Stress-induced-phosphoprotein 1	Stip1	-1.4527	-1.61629	-1.55534	-1.58838		-0.706606	-0.716363	0.624148	0.620774	0	192	74	170	129
Q60865;F6YLI0;F6YP03;A2BH47	Q60865	Caprin-1	Caprin1	-1.94953	-1.22178	-1.45124	-2.05856		-0.951122	-0.540086	0.582652	0.798341	0	30	40	52	54
Q60866;Q60866-2;A2AUR3;A2AUR5	Q60866;Q60866-2;A2AUR3	Phosphotriesterase-related protein	Pter	-0.542606	-0.128417	-0.245543	0.498869		-0.258701	-0.0515486	0.102053	-0.167491	3.2043e-47	3	2	6	7
Q60872;J3QP87;Q3TQZ4;Q3UTA4;E9Q5G6;J3QPI8;D3Z367;J3QMW5;Q3UT53;Q8BX20;F6YNI8;J3QNQ2;J3QPQ5	Q60872;J3QP87;Q3TQZ4;Q3UTA4;E9Q5G6;J3QPI8;D3Z367;J3QMW5;Q3UT53;Q8BX20	Eukaryotic translation initiation factor 1A	Eif1a;Gm2016;Gm2022;Gm2046;BB287469;Gm5662	0.906952	1.03927	1.10478	1.12967		0.454702	0.470198	-0.436197	-0.405719	4.1135e-184	18	25	36	25
Q60876	Q60876	Eukaryotic translation initiation factor 4E-binding protein 1	Eif4ebp1	-0.977446	-1.38178	-0.804093	-0.471554		-0.472709	-0.611579	0.324695	0.198997	3.4701e-22	3	3	4	2
Q60902-3;Q60902;Q60902-2;Q60902-4	Q60902-3;Q60902;Q60902-2;Q60902-4	Epidermal growth factor receptor substrate 15-like 1	Eps15l1	0.822104	#VALUE!	0.534121	0.514301		0.412944	NaN	-0.208728	-0.173319	1.5754e-46	4	0	12	2
Q60930;D3YZT5;D3YUN8	Q60930;D3YZT5	Voltage-dependent anion-selective channel protein 2	Vdac2	0.218135	0.317209	0.217565	0.240795		0.115699	0.147567	-0.0825454	-0.0700272	0	23	17	25	15
Q60932;Q60932-2;F2Z471	Q60932;Q60932-2;F2Z471	Voltage-dependent anion-selective channel protein 1	Vdac1	-0.569664	-0.529065	-1.31632	-1.40362		-0.272019	-0.230567	0.528871	0.550999	0	29	20	27	24
Q60960;G3UXF0;G3UZK5;G3UXT6;G3UWJ8;G3UXW7	Q60960	Importin subunit alpha-1	Kpna1	-0.140071	0.127835	-0.144672	-0.190219		-0.0605929	0.0629506	0.0618453	0.0927488	8.466e-246	11	19	28	27
Q60967	Q60967	Bifunctional 3-phosphoadenosine 5-phosphosulfate synthase 1;Sulfate adenylyltransferase;Adenylyl-sulfate kinase	Papss1	-0.965267	-1.18212	-1.09602	-1.09191		-0.466716	-0.522364	0.441058	0.43328	0	59	30	50	35
Q60972	Q60972	Histone-binding protein RBBP4	Rbbp4	-0.751801	0.117619	-0.568887	-0.601759		-0.361657	0.0583859	0.230941	0.248171	7.6514e-252	45	44	21	24
Q60973;A2AFJ1;A2AFI9;F6ZLC6	Q60973;A2AFJ1;A2AFI9;F6ZLC6	Histone-binding protein RBBP7	Rbbp7	0.361223	0.543722	1.01463	1.24856		0.18612	0.248778	-0.400263	-0.450617	8.6023e-151	20	19	14	11
Q61024;D3Z0C2;D3YYR0;D3Z028	Q61024	Asparagine synthetase [glutamine-hydrolyzing]	Asns	-1.2743	-1.27522	-1.52989	-1.52929		-0.618805	-0.563966	0.614003	0.59846	0	78	67	108	78
Q61029;Q61029-2;Q61029-4;Q61033-2	Q61029;Q61029-2;Q61029-4;Q61033-2	Lamina-associated polypeptide 2, isoforms beta/delta/epsilon/gamma	Tmpo	0.540862	2.23529	2.95794	4.79328		0.27453	1.00461	-1.17488	-1.78931	4.937e-191	29	23	42	29
Q61033	Q61033	Lamina-associated polypeptide 2, isoforms alpha/zeta	Tmpo	-1.45629	-1.25035	0.249476	0.0766312		-0.708373	-0.552855	-0.0952655	-0.00802933	2.5033e-153	3	1	4	2
Q61035	Q61035	Histidine--tRNA ligase, cytoplasmic	Hars	-0.767322	-0.755158	-0.728754	-0.62005		-0.369296	-0.33159	0.294665	0.255078	0	49	46	52	47
Q61074	Q61074	Protein phosphatase 1G	Ppm1g	0.67399	0.755124	1.28304	1.31571		0.340049	0.343237	-0.507255	-0.475976	3.696e-114	19	6	18	11
Q61081	Q61081	Hsp90 co-chaperone Cdc37	Cdc37	-0.452028	-0.894692	-0.722552	-0.549296		-0.214123	-0.393937	0.292193	0.228357	0	45	30	46	28
Q61107;D3YUH5;D3YVW6	Q61107	Guanylate-binding protein 4	Gbp4	-3.59843	-0.000160815	-5.30007	-4.75025	Down	-1.76263	0.0057592	2.11683	1.81488	4.585e-39	8	2	15	11
Q61112;Q61112-2	Q61112;Q61112-2	45 kDa calcium-binding protein	Sdf4	#VALUE!	0.430903	-0.462166	-0.717077		NaN	0.198368	0.188401	0.291721	6.8921e-63	0	3	12	5
Q61127;Q3TYF1;Q61127-2;D3Z292;D3Z008;E9Q1E7	Q61127;Q3TYF1;Q61127-2	NGFI-A-binding protein 2	Nab2	-2.90499	-3.13335	-2.69187	-2.55818	Down	-1.42136	-1.39422	1.07717	0.98703	5.3208e-77	6	5	12	9
Q61140;Q61140-2	Q61140;Q61140-2	Breast cancer anti-estrogen resistance protein 1	Bcar1	-4.21178	#VALUE!	-3.75015	-4.01919	Down	-2.0645	NaN	1.49902	1.53879	1.112e-36	7	0	10	5
Q61151;Q6PD28	Q61151	Serine/threonine-protein phosphatase 2A 56 kDa regulatory subunit epsilon isoform	Ppp2r5e	-1.52035	-2.15627	-1.49113	-1.32112		-0.739902	-0.957636	0.598556	0.519844	1.1889e-29	2	7	7	3
Q61160	Q61160	Protein FADD	Fadd	0	0.233946	0.922249	0.640246		0.00834347	0.110363	-0.363438	-0.220883	1.2317e-25	4	5	4	5
Q61164	Q61164	Transcriptional repressor CTCF	Ctcf	-0.00116622	#VALUE!	-0.146406	0.447982		0.00776951	NaN	0.0625362	-0.148273	2.5673e-12	2	0	6	1
Q61166	Q61166	Microtubule-associated protein RP/EB family member 1	Mapre1	-0.649172	-0.573273	-0.642458	-0.557438		-0.311148	-0.25032	0.260267	0.231432	0	53	60	64	47
Q61171;D3Z4A4	Q61171;D3Z4A4	Peroxiredoxin-2	Prdx2	-0.189149	-0.175879	0.198796	0.0610282		-0.0847468	-0.0727558	-0.075064	-0.00213668	0	50	43	49	63
Q61187;D3Z0S9;D3Z2V5	Q61187	Tumor susceptibility gene 101 protein	Tsg101	0.780192	0.64352	0.770827	0.632151		0.392317	0.29337	-0.30308	-0.217826	8.5575e-31	10	5	11	1
Q61191;B1AUX2;F6SJS2;G5E837;F6T088	Q61191;B1AUX2	Host cell factor 1;HCF N-terminal chain 1;HCF N-terminal chain 2;HCF N-terminal chain 3;HCF N-terminal chain 4;HCF N-terminal chain 5;HCF N-terminal chain 6;HCF C-terminal chain 1;HCF C-terminal chain 2;HCF C-terminal chain 3;HCF C-terminal chain 4;HCF C-terminal chain 5;HCF C-terminal chain 6	Hcfc1	-1.24393	-1.3597	-0.85061	-1.06295		-0.603862	-0.601715	0.343237	0.422341	0	31	22	32	24
Q61205;D3Z7E6;D3Z2X5;Q8CA83	Q61205;D3Z7E6;D3Z2X5	Platelet-activating factor acetylhydrolase IB subunit gamma	Pafah1b3	-3.24545	-3.09723	-2.23657	-2.10831		-1.58892	-1.37808	0.89569	0.817132	1.9284e-132	16	23	26	18
Q61206	Q61206	Platelet-activating factor acetylhydrolase IB subunit beta	Pafah1b2	-0.575228	-0.367332	0.128268	0.206662		-0.274756	-0.158301	-0.0469508	-0.0571365	0	21	29	33	28
Q61216;Q61216-2;F6RX99;B2KF76;B2KF75	Q61216;Q61216-2;F6RX99	Double-strand break repair protein MRE11A	Mre11a	-1.87085	-2.65614	-1.7329	-1.08001		-0.912401	-1.18099	0.694925	0.428786	1.9008e-60	3	5	16	6
Q61235;Q99L88;Q99L88-2	Q61235	Beta-2-syntrophin	Sntb2	1.32839	0.837792	1.02755	0.962196		0.662114	0.380175	-0.405413	-0.34247	6.7173e-137	9	6	14	7
Q61239	Q61239	Protein farnesyltransferase/geranylgeranyltransferase type-1 subunit alpha	Fnta	-0.161488	-0.581619	-1.04825	-1.32485		-0.0711332	-0.254048	0.422018	0.521252	5.8032e-123	6	11	14	12
Q61249;Q9QZ29	Q61249	Immunoglobulin-binding protein 1	Igbp1	-2.98474	-2.85418	-1.205	-1.90893		-1.46061	-1.26948	0.484499	0.741834	5.7357e-89	13	6	23	11
Q61263	Q61263	Sterol O-acyltransferase 1	Soat1	-1.79687	-1.61597	-2.97154	-2.95887		-0.87599	-0.71622	1.18865	1.13836	8.0066e-22	8	15	35	20
Q61292	Q61292	Laminin subunit beta-2	Lamb2	5.70802	4.37564	4.51331	-1.10039	Up	2.81756	1.96096	-1.79486	0.436482	1.4677e-47	6	3	21	6
Q61334	Q61334	B-cell receptor-associated protein 29	Bcap29	0.970846	0.764781	-0.429944	-0.678815		0.486148	0.347552	0.175557	0.277271	5.817e-06	3	4	3	3
Q61335	Q61335	B-cell receptor-associated protein 31	Bcap31	1.80913	1.75709	1.09808	0.924601		0.898711	0.790939	-0.433526	-0.328272	0	82	42	96	42
Q61390;B1AT05	Q61390;B1AT05	T-complex protein 1 subunit zeta-2	Cct6b	0.132206	#VALUE!	0.627933	0.825045		0.0734089	NaN	-0.246122	-0.290674	3.9195e-77	3	0	2	1
Q61398;D3YUE2;D3YZE3;F6QJE1;D3YWH0	Q61398;D3YUE2;D3YZE3	Procollagen C-endopeptidase enhancer 1	Pcolce	3.50476	3.70539	-0.256656	-0.268227		1.73322	1.66148	0.106482	0.122209	6.2003e-212	21	24	34	30
Q61425	Q61425	Hydroxyacyl-coenzyme A dehydrogenase, mitochondrial	Hadh	1.62266	1.681	2.33278	2.03965		0.806943	0.756938	-0.925686	-0.749378	0	33	29	50	28
Q61466;Q61466-2	Q61466;Q61466-2	SWI/SNF-related matrix-associated actin-dependent regulator of chromatin subfamily D member 1	Smarcd1	-11.6846	-0.394578	-0.655428	-1.01619		-5.74228	-0.170475	0.265437	0.404685	9.2411e-48	1	5	2	2
Q61469	Q61469	Lipid phosphate phosphohydrolase 1	Ppap2a	5.14293	4.22956	5.47666	4.91373	Up	2.53946	1.89569	-2.17886	-1.8348	9.8233e-151	8	8	19	12
Q61510;Q5SU71;Q5SU72	Q61510;Q5SU71;Q5SU72	E3 ubiquitin/ISG15 ligase TRIM25	Trim25	0.247744	2.62559	-0.953275	-0.629003		0.130272	1.179	0.38416	0.258459	1.5456e-69	11	2	19	8
Q61543;F8WHM5;F6RSH1;E9PWD8	Q61543;F8WHM5	Golgi apparatus protein 1	Glg1	2.11719	1.86012	0.557452	0.60912		1.05033	0.836974	-0.218028	-0.209128	0	88	73	114	73
Q61550	Q61550	Double-strand-break repair protein rad21 homolog	Rad21	-0.686506	-0.241609	0.285965	0.942146		-0.329522	-0.102125	-0.10981	-0.334898	7.0713e-74	7	7	7	3
Q61553;F7BDR1;D3Z1X1;D3YWW3;D3YZR7	Q61553	Fascin	Fscn1	-0.194813	-0.194782	-0.861435	-0.821434		-0.0875341	-0.0812016	0.347552	0.331132	0	120	102	116	115
Q61576;A2A4H9;F6W360	Q61576;A2A4H9	Peptidyl-prolyl cis-trans isomerase FKBP10	Fkbp10	1.92278	1.83617	1.64405	1.57414		0.954643	0.826274	-0.651156	-0.573574	0	65	41	77	49
Q61578	Q61578	NADPH:adrenodoxin oxidoreductase, mitochondrial	Fdxr	0.86646	0.90579	1.04663	1.00188		0.434775	0.410558	-0.413019	-0.357455	1.1887e-32	2	3	9	4
Q61584;Q61584-3;Q61584-4;Q61584-6;Q61584-5;Q61584-7;Q61584-2	Q61584;Q61584-3;Q61584-4;Q61584-6;Q61584-5;Q61584-7;Q61584-2	Fragile X mental retardation syndrome-related protein 1	Fxr1	-0.851794	-0.761138	-0.0919312	-0.467558		-0.410869	-0.334262	0.0408223	0.197488	1.2543e-131	16	13	29	19
Q61586	Q61586	Glycerol-3-phosphate acyltransferase 1, mitochondrial	Gpam	2.27293	2.45894	3.47986	3.53248		1.12697	1.10454	-1.38293	-1.31315	5.312e-44	5	1	10	13
Q61592	Q61592	Growth arrest-specific protein 6	Gas6	3.75397	4.61562	5.28499	#VALUE!	Up	1.85587	2.06819	-2.10247	#VALUE!	7.7403e-24	4	5	5	0
Q61598;Q61598-2	Q61598;Q61598-2	Rab GDP dissociation inhibitor beta	Gdi2	-0.205828	-0.496162	-0.492532	-0.556464		-0.0929555	-0.215865	0.200504	0.231064	0	163	205	159	126
Q61599;D3YWL7	Q61599	Rho GDP-dissociation inhibitor 2	Arhgdib	-1.52363	-1.66148	0.0126168	-0.0664384		-0.741517	-0.736557	-0.000851407	0.0460021	0	36	36	41	21
Q61635	Q61635		Ifi47	-3.11153	-4.32432	-9.05579	-6.55739	Down	-1.52301	-1.92637	3.61389	2.49736	8.7629e-215	4	6	15	9
Q61655	Q61655	ATP-dependent RNA helicase DDX19A	Ddx19a	-0.79307	-1.10907	-0.606011	-0.717077		-0.381968	-0.489727	0.245739	0.291721	0	28	23	42	26
Q8BTS0;Q61656;B1ARB9;B1ARC0;B1ARB8	Q8BTS0;Q61656	Probable ATP-dependent RNA helicase DDX5	Ddx5	0.362767	0.535831	0.344908	0.203722		0.186881	0.245252	-0.133306	-0.0560262	0	119	72	101	95
Q61696	Q61696	Heat shock 70 kDa protein 1A	Hspa1a	1.94853	1.88174	2.22301	2.07111		0.967316	0.846634	-0.881933	-0.761262	0	109	82	92	72
Q61699;Q61699-2;E9Q0U7;D3Z3I9;D3Z027	Q61699;Q61699-2;E9Q0U7	Heat shock protein 105 kDa	Hsph1	-0.597619	-0.484967	-0.357436	-0.253104		-0.285776	-0.210863	0.146655	0.116498	0	152	68	162	137
Q61712;F6ZL86;F6WEH1	Q61712;F6ZL86	DnaJ homolog subfamily C member 1	Dnajc1	1.58811	#VALUE!	1.62015	1.59609		0.789938	NaN	-0.641626	-0.581864	7.4125e-25	2	0	3	7
Q61733	Q61733	28S ribosomal protein S31, mitochondrial	Mrps31	-0.98278	-0.91081	0.232504	0.571112		-0.475335	-0.401139	-0.0885002	-0.194774	1.611e-111	9	7	17	8
Q61735-2;Q61735	Q61735-2;Q61735	Leukocyte surface antigen CD47	Cd47	3.66518	3.8119	2.82581	2.95217	Up	1.81217	1.70907	-1.12221	-1.094	5.5805e-61	12	21	20	17
Q61753;F6ZSB7;E9QAP9	Q61753	D-3-phosphoglycerate dehydrogenase	Phgdh	-0.768042	-0.813624	-0.657235	-0.67913		-0.36965	-0.357714	0.266157	0.27739	0	91	99	86	70
Q61768;E9QAK5;P33175;A2ARD4	Q61768;E9QAK5	Kinesin-1 heavy chain	Kif5b	-0.204329	-0.163475	-0.390958	-0.26963		-0.0922171	-0.0672131	0.160017	0.122739	0	115	94	144	100
Q61792;A2A6H0;A2A6G9;A2A6G8;A2A6G7;A2A6G6;E9Q0N6;A2A6G5;A2A6H1;A2A6G0;Q9DC07;A2A6G4	Q61792;A2A6H0;A2A6G9;A2A6G8;A2A6G7	LIM and SH3 domain protein 1	Lasp1	0.0617158	-0.372415	0.306135	0.332761		0.0387171	-0.160572	-0.11785	-0.104759	0	72	51	86	63
Q61881;D3Z6N3;D3Z2K9;D3Z0J6;D3Z335	Q61881	DNA replication licensing factor MCM7	Mcm7	-0.666205	-0.506828	-0.647892	-0.546359		-0.319532	-0.220631	0.262433	0.227248	0	86	49	89	72
Q61937;Q5SQB5;Q5SQB0;Q9DAY9;E9Q5T3	Q61937;Q5SQB5;Q5SQB0;Q9DAY9;E9Q5T3	Nucleophosmin	Npm1;Gm5611	-1.14008	-1.62532	-1.10799	-1.26854		-0.552749	-0.720398	0.445833	0.499986	0	181	84	194	90
Q61941;Q8BGK0;Q8C9V5;E9Q8F4	Q61941;Q8BGK0;Q8C9V5;E9Q8F4	NAD(P) transhydrogenase, mitochondrial	Nnt	1.19266	1.20397	0.202649	0.569886		0.595313	0.543793	-0.0765998	-0.194311	7.4602e-111	20	1	26	24
Q61990;Q61990-3;Q61990-2;E9Q7D8	Q61990;Q61990-3;Q61990-2	Poly(rC)-binding protein 2	Pcbp2	-0.289392	1.7612	0.50712	0.974567		-0.134081	0.792772	-0.197964	-0.347142	0	112	74	111	87
Q62000	Q62000	Mimecan	Ogn	4.2676	4.42263	2.10871	1.88244		2.10866	1.98196	-0.836372	-0.690009	4.4227e-119	5	6	14	14
Q62009;Q62009-2;Q62009-3;Q62009-5;CON__Q2KJC7	Q62009;Q62009-2;Q62009-3;Q62009-5	Periostin	Postn	1.30682	1.72333	-0.425132	-0.568485		0.651499	0.775851	0.173639	0.235604	1.2263e-218	25	10	47	32
Q62018;Q62018-3;Q62018-2	Q62018;Q62018-3;Q62018-2	RNA polymerase-associated protein CTR9 homolog	Ctr9	-0.332295	-0.328827	-0.712785	-0.37517		-0.155197	-0.141096	0.2883	0.162597	6.0708e-54	9	6	10	17
Q62048;Q62048-2;D3Z375	Q62048;Q62048-2;D3Z375	Astrocytic phosphoprotein PEA-15	Pea15;Pea15a	-0.348071	-0.15132	-0.773038	-0.268227		-0.162961	-0.061782	0.312317	0.122209	0	8	22	19	22
Q62074;F6QWV4	Q62074;F6QWV4	Protein kinase C iota type	Prkci	-0.52875	-1.51724	-0.72137	-1.08058		-0.251882	-0.672106	0.291721	0.429	6.8297e-21	2	1	4	3
Q62084	Q62084	Protein phosphatase 1 regulatory subunit 14B	Ppp1r14b	-2.51926	-1.80369	-1.54476	-1.67896		-1.23151	-0.800098	0.619929	0.654985	1.3369e-231	6	23	18	13
Q62086	Q62086	Serum paraoxonase/arylesterase 2	Pon2	2.21094	#VALUE!	2.44442	3.60898		1.09646	NaN	-0.970187	-1.34205	1.543e-18	3	0	9	2
Q62087	Q62087	Serum paraoxonase/lactonase 3	Pon3	-2.26946	-2.56661	-3.56912	-2.59444	Down	-1.10858	-1.14098	1.42686	1.00072	5.9492e-68	7	2	7	3
Q62093;H3BJA4	Q62093	Serine/arginine-rich splicing factor 2	Srsf2	0.341575	0.15921	0.238512	0.296051		0.17645	0.0769695	-0.0908952	-0.0908952	2.6581e-199	24	16	29	14
Q62095	Q62095	ATP-dependent RNA helicase DDX3Y	Ddx3y	-0.721859	-0.483398	-0.602958	-0.109488		-0.346922	-0.210162	0.244522	0.06226	0	3	4	4	5
Q62101	Q62101	Serine/threonine-protein kinase D1	Prkd1	-3.44468	-1.41102	-4.32365	-2.04998		-1.68696	-0.624644	1.72762	0.795102	5.3575e-175	1	1	4	2
Q62159;H3BL56	Q62159;H3BL56	Rho-related GTP-binding protein RhoC	Rhoc	-0.045112	-0.72938	-0.475482	-0.159287		-0.0138585	-0.320072	0.193709	0.081067	0	2	11	9	7
Q62165	Q62165	Dystroglycan;Alpha-dystroglycan;Beta-dystroglycan	Dag1	0.000582937	0.59735	2.21968	-0.197376		0.00863037	0.27274	-0.880604	0.0954519	8.9961e-16	2	2	2	2
Q62167;P16381;Q3V086;Q61496	Q62167;P16381	ATP-dependent RNA helicase DDX3X;Putative ATP-dependent RNA helicase Pl10	Ddx3x;D1Pas1	-0.360865	-0.410971	-0.151254	-0.173345		-0.169258	-0.1778	0.0644689	0.0863762	0	119	94	88	78
Q9D8L3;Q62186	Q9D8L3;Q62186	Translocon-associated protein subunit delta	Ssr4	2.26999	2.49151	1.43217	1.46005		1.12552	1.11909	-0.566699	-0.530489	7.3286e-247	17	21	15	17
Q62189;D3Z0S6;D6RI83	Q62189;D3Z0S6	U1 small nuclear ribonucleoprotein A	Snrpa	-0.794292	-0.696217	-0.900476	-0.714268		-0.38257	-0.305253	0.363115	0.29066	4.1229e-36	7	6	8	6
Q62219;Q62219-3;Q62219-2;Q62219-4;E9Q1V4;Q62219-6	Q62219;Q62219-3;Q62219-2;Q62219-4	Transforming growth factor beta-1-induced transcript 1 protein	Tgfb1i1	4.27249	0.440737	4.86184	4.8666	Up	2.11106	0.202762	-1.93379	-1.817	5.466e-289	7	7	9	5
[truncated: 1,977 more rows]
