# Supplementary material for: Phosphoproteomics reveals network rewiring to a pro-adhesion state in annexin-1-deficient mammary epithelial cells
Source: Breast Cancer Res. 2017 Dec 12;19:132. doi: 10.1186/s13058-017-0924-4 (PMC5727667; doi:10.1186/s13058-017-0924-4)
Supplement: Supplementary file 11 — Enrichment of cellular component terms among the different categories. (XLSX 12 kb) [file 13058_2017_924_MOESM11_ESM.xlsx]

## Sheet: Sheet1
Table S7: Enrichment of cellular component terms among the different categories
Cellular Compartment	Up Phosphoprotein_Up Protein (p val)	Up Phosphoprotein_Unchanged Protein (p val)	Down Phosphoprotein_Unchanged Protein (p val)	Down Phosphoprotein_Down Protein (p val)
focal adhesion	0.00213049	1.40197e-05	2.3895e-05	1
cell-substrate adherens junction	0.00226435	1.61643e-05	2.72081e-05	1
cell-substrate junction	0.00235678	1.77463e-05	2.96275e-05	1
adherens junction	0.00352162	1.14097e-06	6.94956e-05	0.392342
anchoring junction	0.00397318	1.61258e-06	8.96879e-05	0.402858
external side of plasma membrane	0.00337923	1	1	1
side of membrane	0.00598364	1	1	1
synapse	0.00655674	0.0374827	0.659303	1
postsynaptic density	0.0107754	1	0.352396	1
synapse part	0.0239089	0.332724	0.520525	1
actin cytoskeleton	0.0376331	0.000526042	0.0539553	0.210294
postsynaptic membrane	0.0383386	0.636445	1	1
contractile fiber	0.0570451	0.0160744	1	1
ruffle membrane	0.0763418	0.027943	1	1
cell-cell adherens junction	0.0733978	0.0259416	1	0.0564366
actin filament bundle	0.0851206	0.000229912	0.217581	1
stress fiber	0.0822032	0.000201081	0.21068	1
intermediate filament cytoskeleton	0.0851206	0.249908	0.00205124	1
actomyosin	0.095262	0.00035444	0.241269	1
sarcolemma	0.0967021	0.00464403	1	1
leading edge membrane	0.141647	0.0137494	0.0669354	1
contractile fiber part	0.235113	0.00024898	0.522518	1
cytosol	0.37345	0.000197468	7.47436e-06	0.021117
nucleoplasm	0.824066	0.457309	0.493041	0.0335421
costamere	1	7.2821e-06	0.0917807	1
cell cortex part	1	0.000242948	0.372066	0.120647
axon	1	0.00157489	1	1
microtubule	1	0.00262242	0.00103306	0.357353
cell division site part	1	0.00956114	1	1
recycling endosome membrane	1	0.00832036	0.107555	1
septin complex	1	0.00258926	1	1
growth cone	1	0.0152996	1	1
site of polarized growth	1	0.0165245	1	1
T-tubule	1	0.0160744	1	1
vesicle coat	1	0.0122722	1	1
COP9 signalosome	1	0.0152783	1	1
microtubule cytoskeleton	1	0.0250064	0.00207396	1
condensed chromosome	1	0.0269347	0.193166	1
membrane coat	1	0.0343025	0.217581	1
SWI/SNF superfamily-type complex	1	0.0472465	0.254487	0.00297206
cytosolic part	1	0.272487	0.0115862	1
microtubule organizing center	1	0.649172	0.000562144	0.0930842
centrosome	1	0.555987	0.000182726	0.0694052
nuclear chromatin	1	0.600792	0.183655	0.0192272
microtubule associated complex	1	0.511304	0.00338685	1
coated vesicle	1	0.323319	0.0444336	1
kinesin complex	1	0.242149	0.0239616	1
transport vesicle	1	0.276454	0.0317305	1
spindle microtubule	1	0.206244	0.0171224	1
nonmotile primary cilium	1	1	0.00350697	1
ciliary basal body	1	1	0.00410223	1
TOR complex	1	1	0.00141482	1
primary cilium	1	1	0.00997135	1
tight junction	1	1	0.0125321	0.123854
ciliary part	1	1	0.017115	1
occluding junction	1	1	0.0125321	0.123854
cilium	1	1	0.0225584	1
cytosolic large ribosomal subunit	1	1	0.0231543	1
heterochromatin	1	1	0.0373869	1
large ribosomal subunit	1	1	0.0433986	1
