# Supplementary material for: Phosphoproteomics reveals network rewiring to a pro-adhesion state in annexin-1-deficient mammary epithelial cells
Source: Breast Cancer Res. 2017 Dec 12;19:132. doi: 10.1186/s13058-017-0924-4 (PMC5727667; doi:10.1186/s13058-017-0924-4)
Supplement: Supplementary file 12 — Summary of associated pathways and localizations of ANXA1-responsive phosphoproteins. (XLSX 29 kb) [file 13058_2017_924_MOESM12_ESM.xlsx]

## Sheet: Sheet1
Table S8: Summary of associated pathways and localizations of ANXA1-responsive phosphoproteins
Focal Adhesion
Leading proteins	Gene names	Site Status	Amino acid	Position
Q8R1A4	Dock7;Dock7;Dock7	Up	S	28
Q8R1A4	Dock7;Dock7;Dock7	Up	S	30
B2RXW8	Ppfia1	Up	S	667
D3Z5J3	Sorbs1;Sorbs1;Sorbs1;Sorbs1;Sorbs1	Up	S	310
E9Q1K3	Add1;Add1;Add1;Add1;Add1	Up	S	12
E9Q1K3	Add1;Add1;Add1;Add1;Add1	Up	S	465
E9Q1K3	Add1;Add1;Add1;Add1;Add1	Up	S	586
E9Q616	Ahnak	Up	S	1283
E9Q616	Ahnak	Up	S	3088
E9Q616	Ahnak	Up	S	5508
E9Q616	Ahnak	Up	S	5510
E9Q616	Ahnak	Up	S	5512
E9Q616	Ahnak	Up	S	1321
E9Q616	Ahnak	Up	S	517
E9Q616	Ahnak	Up	S	5393
E9Q616	Ahnak	Up	S	3744
E9Q1U2	Synpo2;Synpo2;Synpo2	Up	S	895
Q9R1Z8	Sorbs3	Up	S	412
Q8K4L2	Svil;Svil;Svil;Svil	Up	S	666
Q8CI51	Pdlim5	Up	S	111
Q8CI51	Pdlim5	Up	S	134
Q8CI51	Pdlim5	Up	S	136
Q8CI51	Pdlim5	Up	S	137
E9PYQ1	Tgfb1i1;Tgfb1i1;Tgfb1i1	Up	S	194
E9PYQ1	Tgfb1i1;Tgfb1i1;Tgfb1i1	Up	S	403
E9PYQ1	Tgfb1i1;Tgfb1i1;Tgfb1i1	Up	S	186
Q05860-5	Fmn1;Fmn1	Down	S	571
Q05860-5	Fmn1;Fmn1	Down	S	616
E9QLJ5	Plec;Plec;Plec;Plec;Plec;Plec;Plec;Plec;Plec;Plec;Plec;Plec	Up	S	4633
E9QMQ3	Triobp;Triobp;Triobp	Up	S	1603
E9QMQ3	Triobp;Triobp;Triobp	Up	S	1604
E9QMZ5	Plec	Up	S	21
O70318	Epb41l2	Up	S	86
P17095	Hmga1	Down	S	36
P35831	Ptpn12	Down	S	734
P35979	Rpl12;Rpl12-ps1	Down	S	38
P35980	Rpl18;Rpl18	Down	S	130
Q03145	Epha2	Down	S	898
Q03145	Epha2	Down	S	902
Q61937	Npm1;Npm1;Npm1;Npm1;Gm5611	Down	S	241
Q7TPW1	Nexn	Up	S	296
Q8R550	Sh3kbp1;Sh3kbp1	Up	S	549
Q8R550	Sh3kbp1;Sh3kbp1	Up	S	550
Q8R550	Sh3kbp1;Sh3kbp1;Sh3kbp1	Up	S	193
Q91XC0	Ajuba	Down	S	115	Vim
Q9ERG0	Lima1	Up	S	467
Q9ET54-6	Palld;Palld	Up	S	1129
Q9WTQ5	Akap12	Up	S	767
Q9WTQ5	Akap12	Up	S	506
Q9WTQ5	Akap12	Up	S	507
D3Z5J3	Sorbs1;Sorbs1;Sorbs1;Sorbs1;Sorbs1	Up	T	309
E9Q1K3	Add1;Add1;Add1;Add1;Add1	Up	T	610
E9Q616	Ahnak	Up	T	5567
E9Q616	Ahnak	Up	T	4950
E9QLJ5	Plec;Plec;Plec;Plec;Plec;Plec;Plec;Plec;Plec;Plec;Plec;Plec	Up	T	4037
E9QN87	Plec;Plec;Plec	Up	T	119
P20152	Vim;Vim	Down	S	39
Q03145	Epha2	Down	T	899
E9Q616	Ahnak	Up	S	5563
E9Q616	Ahnak	Up	S	5504
E9Q616	Ahnak	Up	S	5508
E9Q616	Ahnak	Up	S	5510
E9Q616	Ahnak	Up	S	5512
E9Q616	Ahnak	Up	T	5567
E9Q616	Ahnak	Up	T	5502
E9Q616	Ahnak	Up	S	5504
E9Q616	Ahnak	Up	S	5508
Microtubules
Leading proteins	Gene names	Site Status	Amino acid	Position
B1AQZ2	Kif3a;Kif3a;Kif3a;Kif3a;Kif3a	Down	S	713
E9PVY8	Macf1;Macf1;Macf1;Macf1;Macf1;Macf1;Macf1	Up	S	3887
Q61026	Ncoa2;Ncoa2	Up	S	698
Q61026	Ncoa2;Ncoa2	Up	S	699
Q9QXL1	Kif21b;Kif21b;Kif21b	Down	S	1168
E9Q7Y3	Nav1	Down	S	50
G3UWG2	Tiam1;Tiam1	Up	S	231
P20357	Map2;Mtap2;Mtap2;Mtap2	Down	S	1783
P39053-6	Dnm1;Dnm1	Down	S	770
P54227	Stmn1;Stmn1;Stmn1	Up	S	16
P70302	Stim1	Up	S	575
Q61235	Sntb2	Down	S	375
Q61771	Kif3b	Down	S	681
Q62433	Ndrg1	Up	S	330
Q8R1Q8	Dync1li1	Down	S	516
Q9DBS5	Klc4	Down	S	566
Q9QYY8	Spast	Up	S	266
Q9Z0H8-2	Clip2	Down	S	939
A2AJI0	Map7d1;Mtap7d1	Up	S	256
A2AJI0	Map7d1;Mtap7d1;Mtap7d1;Mtap7d1	Up	S	401
A2AJI0	Map7d1;Mtap7d1;Mtap7d1;Mtap7d1	Down	S	444
Q9D706	Rpap3	Up	S	429
P70188	Kifap3	Down	S	60
Q80TJ7	Phf8	Up	S	843
O88792	F11r	Down	S	285
Q8R1Q8	Dync1li1	Down	T	515
Q8R1Q8	Dync1li1	Down	S	510
Q8R1Q8	Dync1li1	Down	S	516
Actin Cytoskeleton
Leading proteins	Gene names	Site Status	Amino acid	Position
E9PVY8	Macf1;Macf1;Macf1;Macf1;Macf1;Macf1;Macf1	Up	S	3887
F8VQH0	Abl2;Abl2;Abl2	Down	S	655
F8VQH0	Abl2;Abl2;Abl2	Down	S	936
E9Q1U2	Synpo2;Synpo2;Synpo2	Up	S	895
E9Q616	Ahnak	Up	S	1283
E9Q616	Ahnak	Up	S	3088
E9Q616	Ahnak	Up	S	5508
E9Q616	Ahnak	Up	S	5510
E9Q616	Ahnak	Up	S	5512
E9Q616	Ahnak	Up	S	1321
E9Q616	Ahnak	Up	S	517
E9Q616	Ahnak	Up	S	5393
E9Q616	Ahnak	Up	S	3744
E9QMQ3	Triobp;Triobp;Triobp	Up	S	1603
E9QMQ3	Triobp;Triobp;Triobp	Up	S	1604
O70318	Epb41l2	Up	S	86
Q3UH59	Myh10;Myh10;Myh10	Up	S	1974
Q6R891	Ppp1r9b	Up	S	192
Q8CI51	Pdlim5	Up	S	111
Q8CI51	Pdlim5	Up	S	134
Q8CI51	Pdlim5	Up	S	136
Q8CI51	Pdlim5	Up	S	137
Q8K298	Anln	Up	S	653
Q8K298	Anln	Up	S	637
Q8K298	Anln	Up	S	531
Q8K4L2	Svil;Svil;Svil;Svil	Up	S	666
Q8K4L2	Svil	Down	S	1963
Q8K4L2	Svil;Svil;Svil;Svil;Svil	Down	S	1031
Q9ERG0	Lima1	Up	S	467
Q9ET54-6	Palld;Palld	Up	S	1129
E9Q616	Ahnak	Up	T	5567
E9Q616	Ahnak	Up	T	4950
Q8CI51	Pdlim5	Up	T	110
Q8K4L2	Svil;Svil;Svil;Svil	Up	T	811
E9Q616	Ahnak	Up	S	5563
E9Q616	Ahnak	Up	S	5504
E9Q616	Ahnak	Up	S	5508
E9Q616	Ahnak	Up	S	5510
E9Q616	Ahnak	Up	S	5512
E9Q616	Ahnak	Up	T	5567
E9Q616	Ahnak	Up	T	5502
E9Q616	Ahnak	Up	S	5504
E9Q616	Ahnak	Up	S	5508
Podosome
Leading proteins	Gene names	Site Status	Amino acid	Position
A2AAY5	Sh3pxd2b	Down	S	290
A2AAY5	Sh3pxd2b	Down	S	291
E9QN63	Asap1;Asap1;Asap1;Asap1;Asap1;Asap1;Asap1;Asap1	Up	S	1059
E9QN63	Asap1;Asap1;Asap1;Asap1;Asap1	Up	S	854
O89032	Sh3pxd2a	Up	S	1034
O89032	Sh3pxd2a	Up	S	420
O89032	Sh3pxd2a	Up	S	405
P35831	Ptpn12	Down	S	734
Q8K4L2	Svil;Svil;Svil;Svil	Up	S	666
Q8K4L2	Svil	Down	S	1963
Q8K4L2	Svil;Svil;Svil;Svil;Svil	Down	S	1031
Q9ET54-6	Palld;Palld	Up	S	1129
E9QN63	Asap1;Asap1;Asap1;Asap1;Asap1	Up	T	852
Q8K4L2	Svil;Svil;Svil;Svil	Up	T	811
Lamellipodium
Leading proteins	Gene names	Site Status	Amino acid	Position
F8VQH0	Abl2;Abl2;Abl2	Down	S	655
F8VQH0	Abl2;Abl2;Abl2	Down	S	936
E9PZW8	Myo9b;Myo9b;Myo9b;Myo9b	Down	S	1072
O88477	Igf2bp1	Down	S	181
Q03145	Epha2	Down	S	898
Q03145	Epha2	Down	S	902
Q3UH59	Myh10;Myh10;Myh10	Up	S	1974
Q501J7-3	Phactr4	Down	S	630
Q6R891	Ppp1r9b	Up	S	192
Q80U72	Scrib;Scrib	Up	S	1265
Q91XC0	Ajuba	Down	S	115
Q9D4H4	Amotl1	Up	S	840
Q9ET54-6	Palld;Palld	Up	S	1129
Q9QY06-2	Myo9b	Down	S	1354
Q03145	Epha2	Down	T	899
Stress Fibers
Leading proteins	Gene names	Site Status	Amino acid	Position
B7ZNL3	Tpm1;Tpm1;Tpm1;Tpm1	Up	S	252
D3Z5J3	Sorbs1;Sorbs1;Sorbs1;Sorbs1;Sorbs1	Up	S	310
Q3TN34	Micall2;Micall2	Down	S	832
G3X9J0	Sipa1l3	Down	S	140
Q3UH59	Myh10;Myh10;Myh10	Up	S	1974
Q9ERG0	Lima1	Up	S	467
Q9ET54-6	Palld;Palld	Up	S	1129
D3Z5J3	Sorbs1;Sorbs1;Sorbs1;Sorbs1;Sorbs1	Up	T	309
Cell Junction
Leading proteins	Gene names	Site Status	Amino acid	Position
A2AAY5	Sh3pxd2b	Down	S	290
A2AAY5	Sh3pxd2b	Down	S	291
A2AKD7	Snta1;Snta1	Up	S	183
B0QZN5	Vamp2;Vamp2;Vamp3	Up	S	67
E9Q1Q1	Mast2;Mast2;Mast2;Mast2;Mast2	Up	S	908
D3Z5J3	Sorbs1;Sorbs1;Sorbs1;Sorbs1;Sorbs1	Up	S	310
E9PYQ1	Tgfb1i1;Tgfb1i1;Tgfb1i1	Up	S	194
E9PYQ1	Tgfb1i1;Tgfb1i1;Tgfb1i1	Up	S	403
E9PYQ1	Tgfb1i1;Tgfb1i1;Tgfb1i1	Up	S	186
Q3TN34	Micall2;Micall2	Down	S	832
E9QLJ5	Plec;Plec;Plec;Plec;Plec;Plec;Plec;Plec;Plec;Plec;Plec;Plec	Up	S	4633
E9QMZ5	Plec	Up	S	21
Q8CHG7	Rapgef2;Rapgef2	Up	S	1079
F8VPU2	Farp1	Up	S	427
G3UWG2	Tiam1;Tiam1	Up	S	231
Q3TUQ5	Pnn;Pnn	Down	S	66
O70318	Epb41l2	Up	S	86
O88792	F11r	Down	S	285
O89032	Sh3pxd2a	Up	S	1034
O89032	Sh3pxd2a	Up	S	420
O89032	Sh3pxd2a	Up	S	405
P35831	Ptpn12	Down	S	734
Q03145	Epha2	Down	S	898
Q03145	Epha2	Down	S	902
Q05860-5	Fmn1;Fmn1	Down	S	571
Q05860-5	Fmn1;Fmn1	Down	S	616
Q5I1X5	Ppp1r13l	Up	S	394
Q61235	Sntb2	Down	S	375
Q6R891	Ppp1r9b	Up	S	192
Q7TPW1	Nexn	Up	S	296
Q80U72	Scrib;Scrib	Up	S	1265
Q8C0T5	Sipa1l1	Down	S	208
Q8C0T5	Sipa1l1	Down	S	1544
Q8C0T5	Sipa1l1	Down	S	288
Q8C0T5	Sipa1l1	Down	S	1564
Q8CG73	Rpgrip1l;Rpgrip1l	Down	S	165
Q8CI51	Pdlim5	Up	S	111
Q8CI51	Pdlim5	Up	S	134
Q8CI51	Pdlim5	Up	S	136
Q8CI51	Pdlim5	Up	S	137
Q8K4L2	Svil;Svil;Svil;Svil	Up	S	666
Q8K4L2	Svil	Down	S	1963
Q8K4L2	Svil;Svil;Svil;Svil;Svil	Down	S	1031
Q8R550	Sh3kbp1;Sh3kbp1	Up	S	549
Q8R550	Sh3kbp1;Sh3kbp1	Up	S	550
Q8R550	Sh3kbp1;Sh3kbp1;Sh3kbp1	Up	S	193
Q91XC0	Ajuba	Down	S	115
Q9D4H4	Amotl1	Up	S	840
Q9ET54-6	Palld;Palld	Up	S	1129
Q9JK83	Pard6b	Down	S	10
Q9R1Z8	Sorbs3	Up	S	412
Q9WV92-2	Epb41l3	Up	S	468
Q9WV92-2	Epb41l3	Up	S	470
Q9WV92-2	Epb41l3	Up	S	486
Q9WV92-2	Epb41l3	Up	S	96
Q9WV92-2	Epb41l3	Up	S	63
D3Z5J3	Sorbs1;Sorbs1;Sorbs1;Sorbs1;Sorbs1	Up	T	309
E9PUM4	Tln2	Up	T	1843
E9PYQ1	Tgfb1i1;Tgfb1i1;Tgfb1i1	Up	T	188
E9QLJ5	Plec;Plec;Plec;Plec;Plec;Plec;Plec;Plec;Plec;Plec;Plec;Plec	Up	T	4037
E9QN87	Plec;Plec;Plec	Up	T	119
Q03145	Epha2	Down	T	899
Q8CI51	Pdlim5	Up	T	110
Q8K4L2	Svil;Svil;Svil;Svil	Up	T	811
Q9WV92-2	Epb41l3	Up	S	486
Q9WV92-2	Epb41l3	Up	T	488
Q9WV92-2	Epb41l3	Up	T	495
Ruffle Membrane
Leading proteins	Gene names	Site Status	Amino acid	Position
E9PVY8	Macf1;Macf1;Macf1;Macf1;Macf1;Macf1;Macf1	Up	S	3887
B7ZNL3	Tpm1;Tpm1;Tpm1;Tpm1	Up	S	252
E9Q238	Kank1;Kank1	Up	S	323
G3UWG2	Tiam1;Tiam1	Up	S	231
Q03145	Epha2	Down	S	898
Q03145	Epha2	Down	S	902
Q61097	Ksr1;Ksr1	Up	S	320
Q6R891	Ppp1r9b	Up	S	192
Q03145	Epha2	Down	T	899
Skeletal Muscle Differentiation
Leading proteins	Gene names	Site Status	Amino acid	Position
P58252	Eef2	Down	S	502
Q67FY2	Bcl9l	Up	S	747
Q6DVA0	Lemd2	Up	S	5
Q8CFN5	Mef2c	Up	S	222
Q9WTK0	Nupr1	Up	S	58
P58252	Eef2	Down	T	57
Q9D219	Bcl9	Up	T	115
Cell-Cell Adhesion
Leading proteins	Gene names	Site Status	Amino acid	Position
E9Q1K3	Add1;Add1;Add1;Add1;Add1	Up	S	12
E9Q1K3	Add1;Add1;Add1;Add1;Add1	Up	S	465
E9Q1K3	Add1;Add1;Add1;Add1;Add1	Up	S	586
E9QLJ5	Plec;Plec;Plec;Plec;Plec;Plec;Plec;Plec;Plec;Plec;Plec;Plec	Up	S	4633
E9QMZ5	Plec	Up	S	21
H3BK65	Eps15;Eps15;Eps15;Eps15	Down	S	360
J3QNB1	Larp1	Down	S	81
J3QNT7	Epn2;Epn2;Epn2	Up	S	439
Q5SPX8	Tbc1d10a;Tbc1d10a	Up	S	441
Q5I1X5	Ppp1r13l	Up	S	394
Q62433	Ndrg1	Up	S	330
Q80U72	Scrib;Scrib	Up	S	1265
Q8C845	Efhd2;Efhd2	Up	S	74
Q8C845	Efhd2;Efhd2	Up	S	76
Q8CI51	Pdlim5	Up	S	111
Q8CI51	Pdlim5	Up	S	134
Q8CI51	Pdlim5	Up	S	136
Q8CI51	Pdlim5	Up	S	137
Q8K298	Anln	Up	S	653
Q8K298	Anln	Up	S	637
Q8K298	Anln	Up	S	531
Q9DBG5	Plin3	Up	S	106
Q9ERG0	Lima1	Up	S	467
Q9JLV1	Bag3	Up	S	404
E9Q1K3	Add1;Add1;Add1;Add1;Add1	Up	T	610
E9QLJ5	Plec;Plec;Plec;Plec;Plec;Plec;Plec;Plec;Plec;Plec;Plec;Plec	Up	T	4037
E9QN87	Plec;Plec;Plec	Up	T	119
O08709	Prdx6;Prdx6;Prdx6;Prdx6b	Down	T	44
Q8CI51	Pdlim5	Up	T	110
Q9JLV1	Bag3	Up	S	274
Cell Cycle
Leading proteins	Gene names	Site Status	Amino acid	Position
Q8BZH4	Pogz;Pogz;Pogz;Pogz	Down	S	1334
E0CXC2	Rnf8;Ftsjd2;Ftsjd2	Down	S	52
E9PVX6	Mki67	Up	S	2255
P53995	Anapc1;Anapc1	Up	S	727
P55041	Gem;Rrad;Rrad	Up	S	300
P55041	Gem;Rrad;Rrad	Up	S	298
P55041	Gem	Up	S	22
E9Q827	Arpp19;Arpp19;Arpp19;Arpp19	Down	S	137
P60330	Espl1	Down	S	239
Q80YR7	Clspn	Up	S	1265
Q8K2Z4-2	Ncapd2	Up	S	1323
Q8K3H0	Appl1	Up	S	401
Q8K3H0	Appl1	Up	S	403
E9PVX6	Mki67	Up	T	981
Q8K3H0	Appl1	Up	T	399
Q9JJ66	Cdc20	Up	T	69
Q9JJ66	Cdc20	Up	T	70
GTPase-mediated Signal Transduction
Leading proteins	Gene names	Site Status	Amino acid	Position
A2A5V4	Sh3bp1;Sh3bp1;Sh3bp1;Sh3bp1	Down	S	257
A2A5V4	Sh3bp1;Sh3bp1;Sh3bp1;Sh3bp1	Down	S	262
Q8R1A4	Dock7;Dock7;Dock7	Up	S	28
Q8R1A4	Dock7;Dock7;Dock7	Up	S	30
A2AF47	Dock11	Down	S	12
B1AQY2	Arhgap23;Arhgap23;Arhgap23;Arhgap23	Up	S	599
B1AQY2	Arhgap23;Arhgap23;Arhgap23;Arhgap23	Up	S	622
B1AQY2	Arhgap23;Arhgap23;Arhgap23;Arhgap23	Up	S	624
B2RY04	Dock5	Down	S	1845
Q6IFT4	Arhgap20;Arhgap20	Up	S	46
E9PZW8	Myo9b;Myo9b;Myo9b;Myo9b	Down	S	1072
E9QN63	Asap1;Asap1;Asap1;Asap1;Asap1;Asap1;Asap1;Asap1	Up	S	1059
E9QN63	Asap1;Asap1;Asap1;Asap1;Asap1	Up	S	854
Q8CHG7	Rapgef2;Rapgef2	Up	S	1079
F8VPU2	Farp1	Up	S	427
G3UWG2	Tiam1;Tiam1	Up	S	231
G3X9J0	Sipa1l3	Down	S	140
Q5SPX8	Tbc1d10a;Tbc1d10a	Up	S	441
Q03145	Epha2	Down	S	898
Q03145	Epha2	Down	S	902
Q0KL02-4	Trio	Up	S	2512
Q68FD7	Fnip1	Up	S	686
Q80U72	Scrib;Scrib	Up	S	1265
Q811P8	Arhgap32	Up	S	952
Q8BN58-3	Arhgap28;Arhgap28	Up	S	61
Q8BN58-3	Arhgap28;Arhgap28	Up	S	63
Q8BUR4	Dock1	Up	S	1858
Q8C0T5	Sipa1l1	Down	S	208
Q8C0T5	Sipa1l1	Down	S	1544
Q8C0T5	Sipa1l1	Down	S	288
Q8C0T5	Sipa1l1	Down	S	1564
Q8CGF1	Arhgap29;Arhgap29	Up	S	1040
Q9D8S3	Arfgap3	Up	S	241
Q9QY06-2	Myo9b	Down	S	1354
B2RXX4	Sbf1;Sbf1	Up	T	1137
E9QN63	Asap1;Asap1;Asap1;Asap1;Asap1	Up	T	852
Q03145	Epha2	Down	T	899
Q3UPH7	Arhgef40	Up	T	1072
Q68FD7	Fnip1	Up	T	684
E9Q474	Akap13;Akap13;Akap13	Up	S	1910
E9Q474	Akap13;Akap13;Akap13	Up	S	1913
Transcriptional Regulators
Leading proteins	Gene names	Site Status	Amino acid	Position
E9QAQ7	Arid1a;Arid1a	Down	S	1946
B1AXH8	Runx1t1;Runx1t1;Runx1t1	Up	S	417
D3Z357	Whsc1l1;Whsc1l1;Whsc1l1	Up	S	557
P97496	Smarcc1;Smarcc1;Smarcc1	Down	S	800
P97496	Smarcc1;Smarcc1;Smarcc1;Smarcc1	Down	S	327
P97496	Smarcc1;Smarcc1;Smarcc1;Smarcc1	Down	S	329
Q8C405	Sp100;Sp100;Sp100;Sp100	Down	S	314
E9QAS5	Chd4;Chd4;Chd4;Chd4	Down	S	1531
P63013-2	Prrx1;Prrx1	Up	S	21
O88572	Lrp6;Lrp6	Up	S	1490
P11031	Sub1	Down	S	118
Q2EMV9	Parp14	Down	S	1407
Q6PDG5	Smarcc2;Smarcc2	Up	S	302
Q924K8	Mta3;Mta3;Mta3;Mta3	Up	S	516
Q3V1V3	Esf1	Down	S	156
Q5I1X5	Ppp1r13l	Up	S	394
Q64700	Rbl2	Up	S	1106
Q64700	Rbl2	Up	S	1108
Q67FY2	Bcl9l	Up	S	747
Q7TPH6	Mycbp2;Mycbp2;Mycbp2;Mycbp2	Up	S	2821
Q7TPH6	Mycbp2;Mycbp2;Mycbp2;Mycbp2	Up	S	2823
Q8R2M2	Dnttip2	Down	S	353
Q9CPN8	Igf2bp3	Down	S	165
Q9JJ48	Zc3h8	Down	S	67
Q9JJA7	Ccnl2	Up	S	328
Q9WTK0	Nupr1	Up	S	58
Q08122-4	Tle3;Tle3;Tle3;Tle3;Tle3;Tle3;Tle3;Tle3	Up	T	338
Q08122-4	Tle3;Tle3;Tle3;Tle3;Tle3;Tle3;Tle3;Tle3	Up	T	344
E9QPX0	Apbb2;Apbb2;Apbb2;Apbb2;Apbb2;Apbb2;Apbb2;Apbb2	Up	T	34
O88572	Lrp6;Lrp6	Up	T	1493
Q8BX02	Kank2	Up	T	14
G3UW90	Trps1;Trps1	Down	S	1081
G3UW90	Trps1;Trps1	Down	S	1085
Q6PDG5	Smarcc2;Smarcc2	Up	S	302
Endocytosis
Leading proteins	Gene names	Site Status	Amino acid	Position
H3BK65	Eps15;Eps15;Eps15;Eps15	Down	S	360
J3QNT7	Epn2;Epn2;Epn2	Up	S	439
O88572	Lrp6;Lrp6	Up	S	1490
Q8BGT6	Micall1	Up	S	626
Q8BGT6	Micall1	Up	S	628
Q9D1J1	Necap2	Up	S	181
Q9D1J1	Necap2	Up	S	186
O88572	Lrp6;Lrp6	Up	T	1493
Q9D1J1	Necap2	Up	T	180
Vesicular Transport
Leading proteins	Gene names	Site Status	Amino acid	Position
B0QZN5	Vamp2;Vamp2;Vamp3	Up	S	67
O08547	Sec22b;Sec22b	Down	S	137
O08599	Stxbp1	Up	S	594
O70480	Vamp4;Vamp4	Up	S	17
Q9D0I4	Stx17	Up	S	288
O08547	Sec22b;Sec22b	Down	T	140
AMPK Signaling
Leading proteins	Gene names	Site Status	Amino acid	Position
Q9Z1E4	Gys1;Gys1	Up	S	652
Q9Z1E4	Gys1;Gys1	Up	S	653
Q01237	Hmgcr;Hmgcr	Up	S	871
P12382	Pfkl	Down	S	775
P35569	Irs1;Irs1	Down	S	1096
P55258	Rab8a	Down	S	111
P58252	Eef2	Down	S	502
P81122	Irs2	Down	S	573
P81122	Irs2	Down	S	1089
Q6PAM0	Prkab2;Prkab2;Prkab2	Up	S	38
Q91V89	Ppp2r5d	Up	S	81
P58252	Eef2	Down	T	57
Hippo Signaling
Leading proteins	Gene names	Site Status	Amino acid	Position
P46938	Yap1;Yap1;Yap1;Yap1;Yap1	Down	S	112
P46938	Yap1;Yap1;Yap1;Yap1	Down	S	46
P46938	Yap1;Yap1;Yap1;Yap1;Yap1	Down	S	261
P46938	Yap1;Yap1;Yap1;Yap1	Down	S	94
Q62312	Tgfbr2	Up	S	573
Q62312	Tgfbr2	Up	S	576
Q62312	Tgfbr2	Up	S	578
Q80U72	Scrib;Scrib	Up	S	1265
Q91XC0	Ajuba	Down	S	115
Q9D4H4	Amotl1	Up	S	840
Q9JK83	Pard6b	Down	S	10
P46938	Yap1;Yap1;Yap1;Yap1	Down	T	48
P46938	Yap1;Yap1;Yap1;Yap1	Down	S	94
P46938	Yap1;Yap1;Yap1;Yap1	Down	T	104
MAPK Signaling
Leading proteins	Gene names	Site Status	Amino acid	Position
E9PVG7	Map4k4;Map4k4;Map4k4	Down	S	949
F6Q8A4	Rps6ka1;Rps6ka1;Rps6ka1;Rps6ka1;Rps6ka1;Rps6ka1	Down	S	369
Q8CHG7	Rapgef2;Rapgef2	Up	S	1079
Q07174	Map3k8;Map3k8	Up	S	141
G3UZT5	Mecom;Mecom;Mecom;Mecom;Mecom;Mecom;Mecom	Down	S	860
P18654	Rps6ka3;Rps6ka3	Up	S	369
P18654	Rps6ka3;Rps6ka3	Up	S	715
P54227	Stmn1;Stmn1;Stmn1	Up	S	16
Q62312	Tgfbr2	Up	S	573
Q62312	Tgfbr2	Up	S	576
Q62312	Tgfbr2	Up	S	578
Q8CDB0	Mknk2	Up	S	446
Q8CFN5	Mef2c	Up	S	222
mTOR Signaling
Leading proteins	Gene names	Site Status	Amino acid	Position
A2AVJ5	Prr5l;Prr5l;Prr5l;Prr5l;Prr5l	Down	S	28
F6Q8A4	Rps6ka1;Rps6ka1;Rps6ka1;Rps6ka1;Rps6ka1;Rps6ka1	Down	S	369
J3QNB1	Larp1	Down	S	81
P18654	Rps6ka3;Rps6ka3	Up	S	369
P18654	Rps6ka3;Rps6ka3	Up	S	715
P35569	Irs1;Irs1	Down	S	1096
Q6QI06	Rictor	Down	T	1592
WNT Signaling
Leading proteins	Gene names	Site Status	Amino acid	Position
E9PVY8	Macf1;Macf1;Macf1;Macf1;Macf1;Macf1;Macf1	Up	S	3887
Q9Z138	Ror2;Ror2	Up	S	449
E9PWI3	Mcc;Mcc	Up	S	469
Q0PHV7	Dact3	Up	S	481
Q0PHV7	Dact3	Up	S	165
Q0PHV7	Dact3	Up	S	456
Q9D4H4	Amotl1	Up	S	840
Q9QUN9	Dkk3	Up	S	295
Q9R1Y5	Hic1	Up	S	704
Q08122-4	Tle3;Tle3;Tle3;Tle3;Tle3;Tle3;Tle3;Tle3	Up	T	338
Q08122-4	Tle3;Tle3;Tle3;Tle3;Tle3;Tle3;Tle3;Tle3	Up	T	344
Q0PHV7	Dact3	Up	T	457
Q9D219	Bcl9	Up	T	115
