# Supplementary material for: Phosphoproteomics reveals network rewiring to a pro-adhesion state in annexin-1-deficient mammary epithelial cells
Source: Breast Cancer Res. 2017 Dec 12;19:132. doi: 10.1186/s13058-017-0924-4 (PMC5727667; doi:10.1186/s13058-017-0924-4)
Supplement: Supplementary file 14 — Migration-associated ANXA1-responsive phosphoproteins. (XLSX 43 kb) [file 13058_2017_924_MOESM14_ESM.xlsx]

## Sheet: Sheet1
Table S9: Migration associated ANXA1-responsive phosphoproteins
Leading proteins	Gene names	Site Status	Amino acid	Position	Charge	Multiplicity	Known association with migration	Role in migration
A2A4B1	Lpin3;Lpin3;Lpin3	Up	S	218	2	___1
A2A5V4	Sh3bp1;Sh3bp1;Sh3bp1;Sh3bp1	Down	S	257	3	___1	Yes	Pro-migratory.
A2A5V4	Sh3bp1;Sh3bp1;Sh3bp1;Sh3bp1	Down	S	262	3	___1	Yes	Pro-migratory.
A2A699	Fam171a2	Up	S	409	2	___1
A2A699	Fam171a2	Up	S	410	2	___1
P19973-2	Lsp1;Lsp1;Lsp1	Up	S	241	2	___1	Yes	Pro- and anti-migratory. Regulates T-cell and leukocyte transendothelial migration. Negative regulator of migration in hepatocellular carcinoma.
A2A7S8-2	Kiaa1522	Down	S	1009	3	___1
A2A841	Epb4.1;Epb41;Epb4.1;Epb4.1;Epb4.1;Epb4.1;Epb41l2	Up	S	610	2	___1	Yes	Regulates adhesion, spreading and migration. Pro-migratory. Distributes to leading edge of migrating cells.
A2A8U2	Tmem201	Down	S	454	2	___1	Yes	Pro-migratory.
Q8R1A4	Dock7;Dock7;Dock7	Up	S	28	2	___1	Yes	Pro- and anti-migratory. Activated by ErbB2 to promote Schwann cell migration. Knockdown accelerates interkinetic nuclear migration.
Q8R1A4	Dock7;Dock7;Dock7	Up	S	30	2	___1	Yes	Pro- and anti-migratory. Activated by ErbB2 to promote Schwann cell migration. Knockdown accelerates interkinetic nuclear migration.
A2AAY5	Sh3pxd2b	Down	S	290	2	___1	Yes	Involved in cell adhesion and migration.
A2AAY5	Sh3pxd2b	Down	S	291	3	___1	Yes	Involved in cell adhesion and migration.
A2AF47	Dock11	Down	S	12	3	___1	Yes	Facilitates filopodia formation. Pro-migratory.
A2AFQ0	Huwe1;Huwe1	Up	S	2363	2	___1	Yes	Pro- and anti-migratory. Promotes cell adhesion and migration by degrading TIAM1. Anti-migratory in thyroid cancer.
A2AFQ0	Huwe1;Huwe1	Up	S	1907	2	___1	Yes	Pro- and anti-migratory. Promotes cell adhesion and migration by degrading TIAM1. Anti-migratory in thyroid cancer.
A2AFQ0	Huwe1;Huwe1	Up	S	3759	2	___1	Yes	Pro- and anti-migratory. Promotes cell adhesion and migration by degrading TIAM1. Anti-migratory in thyroid cancer.
A2AJI0	Map7d1;Mtap7d1	Up	S	256	2	___1
A2AJI0	Map7d1;Mtap7d1;Mtap7d1;Mtap7d1	Up	S	401	2	___1
A2AJI0	Map7d1;Mtap7d1;Mtap7d1;Mtap7d1	Down	S	444	2	___1
A2AKD7	Snta1;Snta1	Up	S	183	2	___1	Yes	Tyrosine phosphorylation of Snta1 induces migration. Required for HGF-induced migration of myoblasts.
A7TU71	Shroom2;Shroom2	Down	S	318	2	___1	Yes	Anti-migratory. Depletion increases sprouting and migration.
A7TU71	Shroom2;Shroom2	Down	S	1159	3	___1	Yes	Anti-migratory. Depletion increases sprouting and migration.
Q80XI3-3	Eif4g3;Eif4g3;Eif4g3	Up	S	278	2	___1
Q922B9	Ssfa2;Ssfa2;Ssfa2	Down	S	736	2	___1
A2ATK9	Fam171a1;Fam171a1;Fam171a1	Up	S	460	2	___1
A2AVJ5	Prr5l;Prr5l;Prr5l;Prr5l;Prr5l	Down	S	28	2	___1
Q9EQU5	Set;Set;Set	Down	S	62	2	___1	Yes	Pro-migratory.
E9QAQ7	Arid1a;Arid1a	Down	S	1946	3	___1	Yes	Anti-migratory in different cancers.
A2CG35	Rab12;Rab12	Up	S	68	2	___1
A2RSX9	Arfip1;Arfip1;Arfip1;Arfip1	Up	S	132	2	___1
A3KGF9		Down	S	399	2	___1
A6H5X4	Phf11	Down	S	17	2	___1
A6H5X4	Phf11;Gm6907	Down	S	169	2	___1
A6H6A5	Pgr;Pgr;Pgr	Up	S	287	2	___1	Yes	Asscoiates with FAK and IRS2 to promote cell migration.
A8C756	Thada	Down	S	861	2	___1
P70271	Pdlim4;Pdlim4;Pdlim4	Down	S	111	3	___1
P70271	Pdlim4;Pdlim4;Pdlim4	Down	S	119	2	___1
B0QZN5	Vamp2;Vamp2;Vamp3	Up	S	67	2	___1	Yes	Knockdown reduced adhesion and chemotactic migration to fibronectin.
B1APX2	5031439G07Rik	Up	S	347	2	___1
B1APX2	5031439G07Rik	Up	S	349	3	___1
B1APX2	5031439G07Rik	Up	S	405	2	___1
B1AQY2	Arhgap23;Arhgap23;Arhgap23;Arhgap23	Up	S	599	2	___1
B1AQY2	Arhgap23;Arhgap23;Arhgap23;Arhgap23	Up	S	622	2	___1
B1AQY2	Arhgap23;Arhgap23;Arhgap23;Arhgap23	Up	S	624	2	___1
B1AQZ2	Kif3a;Kif3a;Kif3a;Kif3a;Kif3a	Down	S	713	2	___1	Yes	Pro-migratory in breast cancer cells.
E9PVY8	Macf1;Macf1;Macf1;Macf1;Macf1;Macf1;Macf1	Up	S	3887	2	___1	Yes	Involved in wound healing and epidermal cell migration. Deletion caused abnormal interneuron migration.
B1ASA5	Zfp362	Up	S	402	4	___1
E9Q1Q1	Mast2;Mast2;Mast2;Mast2;Mast2	Up	S	908	2	___1	Yes	Promotes border cell migration and protrusion formation.
Q9QY36	Naa10;Naa10;Naa10	Down	S	205	2	___1	Yes	Anti-migratory.
B1AXH8	Runx1t1;Runx1t1;Runx1t1	Up	S	417	2	___1	Yes	RUNX1–RUNX1T1 fusion protein promotes migration and VLA-4 mediated adhesion.
F8VQH0	Abl2;Abl2;Abl2	Down	S	655	2	___1	Yes	Anti-migratory.
F8VQH0	Abl2;Abl2;Abl2	Down	S	936	2	___1	Yes	Anti-migratory.
B2RT41	Zfc3h1	Down	S	1049	2	___1
B2RXW8	Ppfia1	Up	S	667	2	___1	Yes	Pro- and anti-migratory in different cancers. Regulator of vimentin.
B2RY04	Dock5	Down	S	1845	3	___1	Yes	Pro-migratory.
B7ZNL3	Tpm1;Tpm1;Tpm1;Tpm1	Up	S	252	2	___1	Yes	Overexpression inhibits migration in cancers.
B9EJ80	Pdzd8	Up	S	960	2	___1
Q69Z89	Radil;Radil;Radil	Up	S	235	2	___1	Yes	Controls neutrophil adhesion and motility. Regulates integrin signaling.
Q6IFT4	Arhgap20;Arhgap20	Up	S	46	2	___1
Q8BZH4	Pogz;Pogz;Pogz;Pogz	Down	S	1334	2	___1
E9Q1U2	Synpo2;Synpo2;Synpo2	Up	S	895	2	___1	Yes	Induces assembly of immature focal adhesion to promote lamellipdoia formation. Pro-migratory in prostate cancer.
D3YVW2	Golim4;Golim4	Up	S	568	2	___1
D3YYT1	Glyr1;Glyr1	Down	S	130	2	___1
Q9Z1E4	Gys1;Gys1	Up	S	652	3	___1	Yes	Pro-migratory and invasive in glioblastoma.
Q9Z1E4	Gys1;Gys1	Up	S	653	3	___1	Yes	Pro-migratory and invasive in glioblastoma.
Q8BGB2	Ttc7a;Ttc7	Up	S	648	2	___1	Yes	Regulates Rho signaling pathway. Ttc7a-deficient leukocytes showed impaired migration.
D3Z0X5	Phldb1;Phldb1;Phldb1;Phldb1;Phldb1	Up	S	463	2	___1	Yes	Together with Liprin-a1 promotes cell invasion and migration by stabilizing protrusive activity at cell front.
D3Z0X5	Phldb1;Phldb1;Phldb1;Phldb1;Phldb1;Phldb1	Up	S	553	2	___1	Yes	Together with Liprin-a1 promotes cell invasion and migration by stabilizing protrusive activity at cell front.
D3Z0X5	Phldb1;Phldb1;Phldb1;Phldb1;Phldb1	Up	S	431	2	___1	Yes	Together with Liprin-a1 promotes cell invasion and migration by stabilizing protrusive activity at cell front.
D3Z0X5	Phldb1;Phldb1;Phldb1;Phldb1;Phldb1	Up	S	445	2	___1	Yes	Together with Liprin-a1 promotes cell invasion and migration by stabilizing protrusive activity at cell front.
D3Z0X5	Phldb1;Phldb1;Phldb1;Phldb1;Phldb1	Up	S	420	2	___1	Yes	Together with Liprin-a1 promotes cell invasion and migration by stabilizing protrusive activity at cell front.
D3Z357	Whsc1l1;Whsc1l1;Whsc1l1	Up	S	557	2	___1	Yes	NSD3 highly expressed in migratory neural crest cells and loss prevents migration.
P97496	Smarcc1;Smarcc1;Smarcc1	Down	S	800	2	___1
P97496	Smarcc1;Smarcc1;Smarcc1;Smarcc1	Down	S	327	3	___1
P97496	Smarcc1;Smarcc1;Smarcc1;Smarcc1	Down	S	329	2	___1
D3Z5J3	Sorbs1;Sorbs1;Sorbs1;Sorbs1;Sorbs1	Up	S	310	2	___1	Yes	Anti-migratory. Silencing promotes EMT process. Inhibitor of metastasis.
Q8R3P9	Ankrd32;Ankrd32	Down	S	159	2	___1
E0CXC2	Rnf8;Ftsjd2;Ftsjd2	Down	S	52	2	___1	Yes	Pro-migratory and invasive.
E9PU87	Sik3;Sik3;Sik3;Sik3	Down	S	674	2	___1
E9PUH7	Nfix;Nfix;Nfix	Up	S	333	2	___1	Yes	Pro-migratory in the subventricular zone neurogenic niche.
Q9Z138	Ror2;Ror2	Up	S	449	3	___1	Yes	Induces migration and invasion in ovarian cancer.
E9PUU4	Gemin5	Down	S	1414	2	___1
Q61026	Ncoa2;Ncoa2	Up	S	698	2	___1
Q61026	Ncoa2;Ncoa2	Up	S	699	2	___1
E9PVG7	Map4k4;Map4k4;Map4k4	Down	S	949	2	___1	Yes	Pro-migratory.
E9PVX6	Mki67	Up	S	2255	2	___1
E9PW43	Gm10320;Sec61b	Down	S	49	2	___1
E9PWI3	Mcc;Mcc	Up	S	469	2	___1	Yes	Promotes epithelial cell migration in response to HRG.
F6Q8A4	Rps6ka1;Rps6ka1;Rps6ka1;Rps6ka1;Rps6ka1;Rps6ka1	Down	S	369	3	___1	Yes	Pro-migratory.
Q811L6	Mast4;Mast4;Mast4	Down	S	1368	2	___1
Q64318	Zeb1;Zeb1;Zeb1	Up	S	624	3	___1	Yes	Enhances transendothelial migration. Promigratory.
E9PYB0	Ahnak2	Up	S	326	2	___1	Yes	Pro-migratory in clear cell renal cell carcinoma
E9PYH0	Vcan;Vcan	Up	S	2281	2	___1	Yes	Anti-migratory in neural crest cells.
E9PYQ1	Tgfb1i1;Tgfb1i1;Tgfb1i1	Up	S	194	2	___1	Yes	Promotes endothelial migration to LPA.
E9PYQ1	Tgfb1i1;Tgfb1i1;Tgfb1i1	Up	S	403	2	___1	Yes	Promotes endothelial migration to LPA.
E9PYQ1	Tgfb1i1;Tgfb1i1;Tgfb1i1	Up	S	186	2	___1	Yes	Promotes endothelial migration to LPA.
Q3TN34	Micall2;Micall2	Down	S	832	2	___1
E9PZW8	Myo9b;Myo9b;Myo9b;Myo9b	Down	S	1072	2	___1	Yes	Knockdown increased stress fiber formation and migration.
Q9QXL1	Kif21b;Kif21b;Kif21b	Down	S	1168	2	___1
E9Q0S6	Tns1	Up	S	1363	2	___1	Yes	Pro-migratory. Localizes to adhesions.
E9Q0S6	Tns1	Up	S	1367	3	___1	Yes	Pro-migratory. Localizes to adhesions.
E9Q0S6	Tns1	Up	S	1468	2	___1	Yes	Pro-migratory. Localizes to adhesions.
E9Q0S6	Tns1	Up	S	1470	2	___1	Yes	Pro-migratory. Localizes to adhesions.
E9Q0S6	Tns1	Up	S	1423	4	___1	Yes	Pro-migratory. Localizes to adhesions.
E9Q0S6	Tns1	Up	S	616	2	___1	Yes	Pro-migratory. Localizes to adhesions.
E9Q0S6	Tns1	Up	S	1535	2	___1	Yes	Pro-migratory. Localizes to adhesions.
E9Q0S6	Tns1	Up	S	836	2	___1	Yes	Pro-migratory. Localizes to adhesions.
E9Q0S6	Tns1	Up	S	1397	4	___1	Yes	Pro-migratory. Localizes to adhesions.
E9Q0S6	Tns1	Up	S	790	2	___1	Yes	Pro-migratory. Localizes to adhesions.
E9Q0S6	Tns1	Up	S	792	2	___1	Yes	Pro-migratory. Localizes to adhesions.
E9Q0S6	Tns1	Up	S	1346	2	___1	Yes	Pro-migratory. Localizes to adhesions.
E9Q0S6	Tns1	Up	S	169	2	___1	Yes	Pro-migratory. Localizes to adhesions.
E9Q0S6	Tns1	Up	S	509	2	___1	Yes	Pro-migratory. Localizes to adhesions.
E9Q1K3	Add1;Add1;Add1;Add1;Add1	Up	S	12	2	___1	Yes	Anti-migratory. Negative regulator of invasion and migration in lung cancer
E9Q1K3	Add1;Add1;Add1;Add1;Add1	Up	S	465	2	___1	Yes	Anti-migratory. Negative regulator of invasion and migration in lung cancer
E9Q1K3	Add1;Add1;Add1;Add1;Add1	Up	S	586	2	___1	Yes	Anti-migratory. Negative regulator of invasion and migration in lung cancer
E9Q238	Kank1;Kank1	Up	S	323	2	___1	Yes	Knockdown interfered with directed cell migration.
E9Q2S0	Pcdh7;Pcdh7	Up	S	974	2	___1	Yes	Pro-migratory. Induces brain and breast cancer metastasis.
E9Q3F7	Peg10;Peg10;Peg10	Down	S	30	2	___1	Yes	Pro-migratory in different cancers.
E9Q3L2	Pi4ka	Up	S	1378	2	___1
P59438	Hps5;Hps5;Hps5	Up	S	534	2	___1
E9Q4K7	Kif13b	Up	S	1409	2	___1	Yes	Involved in germ cell migration. Depletion supressed VEGF-mediated endothelial migration.
E9Q4K7	Kif13b	Up	S	1390	3	___1	Yes	Involved in germ cell migration. Depletion supressed VEGF-mediated endothelial migration.
Q91VN4	Chchd6;Chchd6	Down	S	164	2	___1
Q8C405	Sp100;Sp100;Sp100;Sp100	Down	S	314	2	___1
E9Q555	Rnf213;Rnf213	Down	S	2234	2	___1
E9Q555	Rnf213;Rnf213	Down	S	271	2	___1
E9Q555	Rnf213;Rnf213	Down	S	274	2	___1
E9Q555	Rnf213;Rnf213	Down	S	252	2	___1
E9Q616	Ahnak	Up	S	1283	2	___1	Yes	Regulates smooth muscle cell migration via Rac activation.
E9Q616	Ahnak	Up	S	3088	2	___1	Yes	Regulates smooth muscle cell migration via Rac activation.
E9Q616	Ahnak	Up	S	5508	2	___1	Yes	Regulates smooth muscle cell migration via Rac activation.
E9Q616	Ahnak	Up	S	5510	2	___1	Yes	Regulates smooth muscle cell migration via Rac activation.
E9Q616	Ahnak	Up	S	5512	2	___1	Yes	Regulates smooth muscle cell migration via Rac activation.
E9Q616	Ahnak	Up	S	1321	3	___1	Yes	Regulates smooth muscle cell migration via Rac activation.
E9Q616	Ahnak	Up	S	517	2	___1	Yes	Regulates smooth muscle cell migration via Rac activation.
E9Q616	Ahnak	Up	S	5393	2	___1	Yes	Regulates smooth muscle cell migration via Rac activation.
E9Q616	Ahnak	Up	S	3744	2	___1	Yes	Regulates smooth muscle cell migration via Rac activation.
F8VQD7	Ptprg;Ptprg;Ptprg	Up	S	1179	2	___1	Yes	Anti-migratory in breast cancer cells.
E9Q7Y3	Nav1	Down	S	50	2	___1	Yes	Involved in neuronal migration.
E9Q8L9	Rab11fip1;Rab11fip1	Down	S	358	2	___1
E9Q8L9	Rab11fip1	Down	S	541	2	___1
E9Q9R9	Dlg5;Dlg5;Dlg5	Up	S	1263	2	___1	Yes	Anti-migratory in prostate cancer cells. Maintains cell polarity.
E9Q9R9	Dlg5;Dlg5;Dlg5	Down	S	972	2	___1	Yes	Anti-migratory in prostate cancer cells. Maintains cell polarity.
E9QAS5	Chd4;Chd4;Chd4;Chd4	Down	S	1531	2	___1	Yes	Pro-migratory.
E9QAU9	Lrch3;Lrch3;Lrch3;Lrch3;Lrch3;Lrch3;Lrch3;Lrch3	Up	S	625	2	___1
E9QAU9	Lrch3;Lrch3;Lrch3;Lrch3;Lrch3;Lrch3	Down	S	415	4	___1
E9QB01	Ncam1;Ncam1	Up	S	770	3	___1	Yes	Influences cell adhesion and migration.
E9QB01	Ncam1;Ncam1	Up	S	774	3	___1	Yes	Influences cell adhesion and migration.
E9QLH9	D8Ertd82e;Sgk223	Down	S	671	2	___1	Yes	Pro-migratory and invasive
E9QLJ5	Plec;Plec;Plec;Plec;Plec;Plec;Plec;Plec;Plec;Plec;Plec;Plec	Up	S	4633	2	___1	Yes	Pro- and anti-migratory in different cancers.
E9QMF5	Nav3;Nav3;Nav3	Up	S	1248	2	___1	Yes	Anti-migratory. Silencing increased metastasis.
H3BJL0	Apobec3;Apobec3;Apobec3;Apobec3;Apobec3;Apobec3;Apobec3	Down	S	66	3	___1
E9QN63	Asap1;Asap1;Asap1;Asap1;Asap1;Asap1;Asap1;Asap1	Up	S	1059	2	___1	Yes	Anti-migratory. Knockdown increases speed of migration and spreading.
E9QN63	Asap1;Asap1;Asap1;Asap1;Asap1	Up	S	854	2	___1	Yes	Anti-migratory. Knockdown increases speed of migration and spreading.
E9QMQ3	Triobp;Triobp;Triobp	Up	S	1603	2	___1	Yes	Pro-migratory. In complex with Ndel1 to regulate actin cytoskeleton.
E9QMQ3	Triobp;Triobp;Triobp	Up	S	1604	2	___1	Yes	Pro-migratory. In complex with Ndel1 to regulate actin cytoskeleton.
E9QMZ5	Plec	Up	S	21	2	___1	Yes	Pro- and anti-migratory in different cancers.
E9QN92	Steap3;Steap3;Steap3	Up	S	55	2	___1
E9QN92	Steap3;Steap3;Steap3	Up	S	58	2	___1
Q8CHG7	Rapgef2;Rapgef2	Up	S	1079	2	___1	Yes	Pro- and anti-migratory. Supresses metastasis in human breast cancer cells.
Q01237	Hmgcr;Hmgcr	Up	S	871	3	___1	Yes	Pro-migratory in glioblastoma.
F7DBB3	Ahnak2;Ahnak2	Up	S	1261	2	___1	Yes	Pro-migratory in cancers.
F7DBB3	Ahnak2;Ahnak2	Up	S	1273	3	___1	Yes	Pro-migratory in cancers.
F8VPU2	Farp1	Up	S	427	3	___1
F8VQ05	Fryl	Down	S	1958	2	___1
F8VQK5	Sash1;Sash1	Down	S	1014	2	___1	Yes	Anti-migratory.
J3QP99	Fam160a2;Fam160a2	Down	S	877	2	___1
F8WJA0	Ddx24;Ddx24	Down	S	126	2	___1
G3UWA5	Zfp385a	Up	S	160	2	___1
G3UWG2	Tiam1;Tiam1	Up	S	231	2	___1	Yes	Pro- and anti-migratory in different cancers.
Q07174	Map3k8;Map3k8	Up	S	141	2	___1	Yes	Pro-migratory in ovarian cancer.
P63013-2	Prrx1;Prrx1	Up	S	21	2	___1	Yes	Pro-migratory in different cancers.
G3UZT5	Mecom;Mecom;Mecom;Mecom;Mecom;Mecom;Mecom	Down	S	860	2	___1
G3X915	Lysmd2;Lysmd2	Up	S	5	2	___1
G3X9J0	Sipa1l3	Down	S	140	2	___1
G5E8L8	Map3k2;Map3k2	Down	S	153	2	___1	Yes	Anti-migratory.
Q8BMQ3	Bnc2;Bnc2;Bnc2;Bnc2;Bnc2	Up	S	856	2	___1
Q8BMQ3	Bnc2;Bnc2;Bnc2;Bnc2;Bnc2	Up	S	857	2	___1
Q8BMQ3	Bnc2;Bnc2;Bnc2;Bnc2	Up	S	7	2	___1
H3BK65	Eps15;Eps15;Eps15;Eps15	Down	S	360	2	___1
Q60954-2	Meis1;Meis1;Meis1	Up	S	194	3	___1	Yes	Anti-migratory and anti-invasive in renal cancer. Supresses EMT process.
Q60954-2	Meis1;Meis1;Meis1	Up	S	196	2	___1	Yes	Anti-migratory and anti-invasive in renal cancer. Supresses EMT process.
Q549C9	Trp53;Tp53;Trp53	Down	S	310	2	___1	Yes	Anti-migratory.
Q549C9	Trp53;Tp53;Trp53	Down	S	312	2	___1	Yes
J3QNB1	Larp1	Down	S	81	3	___1	Yes	Pro- and anti-migratory. Knockdown delays migration.
J3QNT7	Epn2;Epn2;Epn2	Up	S	439	2	___1
O08547	Sec22b;Sec22b	Down	S	137	2	___1
O08599	Stxbp1	Up	S	594	2	___1
O08715-4	Akap1	Up	S	136	2	___1
O08750	Nfil3	Down	S	301	3	___1
O08750	Nfil3	Down	S	275	2	___1
O09174	Amacr	Down	S	323	2	___1	Yes	Pro-migratory.
Q3TUQ5	Pnn;Pnn	Down	S	66	2	___1	Yes	Anti-migratory. Promotes adhesion.
O35929	Rem1;Rem1	Down	S	51	2	___1
O35945	Aldh1a7	Down	S	3	2	___1
O70318	Epb41l2	Up	S	86	2	___1
O70480	Vamp4;Vamp4	Up	S	17	2	___1
O88273	Grem2	Up	S	55	2	___1
O88273	Grem2	Up	S	56	2	___1
O88343	Slc4a4;Slc4a4	Up	S	1069	2	___1	Yes	Pro-migratory in breast cancer cells.
O88343	Slc4a4;Slc4a4	Up	S	245	2	___1	Yes	Pro-migratory in breast cancer cells.
O88343	Slc4a4;Slc4a4;Slc4a4;Slc4a4	Up	S	255	2	___1	Yes	Pro-migratory in breast cancer cells.
O88343	Slc4a4;Slc4a4;Slc4a4;Slc4a4	Up	S	256	2	___1	Yes	Pro-migratory in breast cancer cells.
O88343	Slc4a4;Slc4a4;Slc4a4;Slc4a4	Up	S	257	2	___1	Yes	Pro-migratory in breast cancer cells.
O88343	Slc4a4;Slc4a4;Slc4a4;Slc4a4	Up	S	262	3	___1	Yes	Pro-migratory in breast cancer cells.
O88477	Igf2bp1	Down	S	181	2	___1	Yes	Pro-migratory. Promotes mesenchymal properties.
O88572	Lrp6;Lrp6	Up	S	1490	2	___1	Yes	Pro-migratory and invasive in different cancers.
O88792	F11r	Down	S	285	3	___1	Yes	Pro-migratory.
O89032	Sh3pxd2a	Up	S	1034	2	___1	Yes	Required for neural crest migration.
O89032	Sh3pxd2a	Up	S	420	2	___1	Yes	Required for neural crest migration.
O89032	Sh3pxd2a	Up	S	405	2	___1	Yes	Required for neural crest migration.
P11031	Sub1	Down	S	118	2	___1	Yes	Pro-migratory and invasive.
P12382	Pfkl	Down	S	775	2	___1
P13595	Ncam1	Up	S	946	3	___1	Yes	Influences cell adhesion and migration.
P13595	Ncam1	Up	S	887	2	___1	Yes	Influences cell adhesion and migration.
P13595	Ncam1	Up	S	1005	2	___1	Yes	Influences cell adhesion and migration.
P17095	Hmga1	Down	S	36	3	___1	Yes	Pro-migratory and invasive in different cancers.
P18654	Rps6ka3;Rps6ka3	Up	S	369	2	___1	Yes	Regulates integrin-mediated adhesion and migration.
P18654	Rps6ka3;Rps6ka3	Up	S	715	2	___1	Yes	Regulates integrin-mediated adhesion and migration.
P20152	Vim;Vim	Down	S	39	2	___1	Yes	Pro-migratory. Contributes to EMT.
P20357	Map2;Mtap2;Mtap2;Mtap2	Down	S	1783	2	___1
P20934	Evi2a	Up	S	197	3	___1
P22893	Zfp36	Down	S	178	2	___1	Yes	Anti-migratory. Supresses EMT.
P22893	Zfp36	Down	S	184	2	___1	Yes	Anti-migratory. Supresses EMT.
P23950	Zfp36l1	Up	S	54	2	___1	Yes	Anti-migratory in different cancers.
P28667	Marcksl1	Down	S	104	2	___1
P35486	Pdha1	Up	S	293	2	___1
P35486	Pdha1	Up	S	295	3	___1
P35569	Irs1;Irs1	Down	S	1096	2	___1	Yes	Pro-migratory. Promotes EMT.
P35831	Ptpn12	Down	S	734	3	___1	Yes	Anti-migratory. Suppresses EMT.
P35979	Rpl12;Rpl12-ps1	Down	S	38	2	___1
P35980	Rpl18;Rpl18	Down	S	130	2	___1
P37804	Tagln	Up	S	166	2	___1	Yes	Anti-migratory and anti-invasive in prostate cancer cells.
P37889	Fbln2	Up	S	574	2	___1	Yes	Anti-migratory and anti-invasive.
P39053-6	Dnm1;Dnm1	Down	S	770	2	___1
P42230	Stat5a;Stat5a	Up	S	128	2	___1	Yes	Promotes adhesion and inhibits invasiveness in human breast cancer cells.
P42230	Stat5a	Up	S	779	2	___1	Yes	Promotes adhesion and inhibits invasiveness in human breast cancer cells.
P46938	Yap1;Yap1;Yap1;Yap1;Yap1	Down	S	112	3	___1	Yes	Pro-migratory and invasive in different cancers.
P46938	Yap1;Yap1;Yap1;Yap1	Down	S	46	2	___1	Yes	Pro-migratory and invasive in different cancers.
P46938	Yap1;Yap1;Yap1;Yap1;Yap1	Down	S	261	2	___1	Yes	Pro-migratory and invasive in different cancers.
P46938	Yap1;Yap1;Yap1;Yap1	Down	S	94	2	___1	Yes	Pro-migratory and invasive in different cancers.
P52479-2	Usp10;Usp10	Down	S	542	2	___1
P52795	Efnb1	Up	S	280	2	___1	Yes	Pro-migratory.
P53995	Anapc1;Anapc1	Up	S	727	2	___1
P54227	Stmn1;Stmn1;Stmn1	Up	S	16	2	___1	Yes	Pro- and anti-migratory in different cancers.
P55041	Gem;Rrad;Rrad	Up	S	300	2	___1	Yes	Pro-migratory.
P55041	Gem;Rrad;Rrad	Up	S	298	2	___1	Yes	Pro-migratory.
P55041	Gem	Up	S	22	2	___1	Yes	Pro-migratory.
P55258	Rab8a	Down	S	111	2	___1
E9Q827	Arpp19;Arpp19;Arpp19;Arpp19	Down	S	137	2	___1
P56695	Wfs1;Wfs1;Wfs1	Up	S	158	2	___1
P58252	Eef2	Down	S	502	2	___1	Yes	Pro-migratory.
Q5SPX8	Tbc1d10a;Tbc1d10a	Up	S	441	3	___1
P58871	Tnks1bp1	Down	S	429	2	___1
P60330	Espl1	Down	S	239	2	___1
P70188	Kifap3	Down	S	60	2	___1	Yes	Pro-migratory.
P70302	Stim1	Up	S	575	2	___1	Yes	Pro-migratory in renal cancer cells.
P81068	Irx1	Up	S	447	2	___1	Yes	Anti-migratory and tumor supressive.
P81068	Irx1	Up	S	266	2	___1	Yes	Anti-migratory and tumor supressive.
P81068	Irx1	Up	S	267	2	___1	Yes	Anti-migratory and tumor supressive.
P81122	Irs2	Down	S	573	2	___1	Yes	Pro-migratory.
P81122	Irs2	Down	S	1089	2	___1	Yes	Pro-migratory.
P97792	Cxadr	Down	S	332	2	___1
Q00560	Il6st	Up	S	665	3	___1
Q03141	Mark3	Up	S	469	2	___1
Q03145	Epha2	Down	S	898	2	___1	Yes	Pro-migratory and invasive.
Q03145	Epha2	Down	S	902	2	___1	Yes	Pro-migratory and invasive.
Q03963	Eif2ak2	Down	S	30	2	___1
Q03963	Eif2ak2	Down	S	32	2	___1
Q04899	Cdk18	Down	S	109	2	___1	Yes	Anti-migratory.
Q04899	Cdk18	Down	S	66	2	___1	Yes	Anti-migratory.
Q04899	Cdk18	Down	S	75	2	___1	Yes	Anti-migratory.
Q05860-5	Fmn1;Fmn1	Down	S	571	2	___1	Yes	Pro-migratory.
Q05860-5	Fmn1;Fmn1	Down	S	616	2	___1	Yes	Pro-migratory.
Q05860-5		Down	S	230	2	___1
Q5XPI3-2	Rnf123;Rnf123	Up	S	681	2	___1
Q0KL02-4	Trio	Up	S	2512	2	___1	Yes	Pro-migratory.
Q0PHV7	Dact3	Up	S	481	2	___1
Q0PHV7	Dact3	Up	S	165	2	___1
Q0PHV7	Dact3	Up	S	456	2	___1
Q148V8	Fam83h	Down	S	1041	2	___1	Yes	Pro-migratory in different cancers.
Q148V8	Fam83h	Down	S	970	2	___1	Yes	Pro-migratory in different cancers.
Q148V8	Fam83h	Down	S	871	2	___1	Yes	Pro-migratory in different cancers.
Q148V8	Fam83h	Down	S	948	2	___1	Yes	Pro-migratory in different cancers.
Q148V8	Fam83h	Down	S	904	2	___1	Yes	Pro-migratory in different cancers.
Q148V8	Fam83h	Down	S	926	2	___1	Yes	Pro-migratory in different cancers.
Q148V8	Fam83h	Down	S	778	2	___1	Yes	Pro-migratory in different cancers.
Q2EMV9	Parp14	Down	S	1407	2	___1	Yes	Pro-migratory.
Q3TLH4	Prrc2c	Down	S	899	2	___1
Q3TYK3	Nfix	Up	S	292	2	___1	Yes	Regulates migration.
Q3U2G2	Hspa4;Hspa4	Down	S	76	2	___1	Yes	Pro- and anti-migratory.
Q3UDW8	Hgsnat	Up	S	238	2	___1
Q3UH59	Myh10;Myh10;Myh10	Up	S	1974	2	___1
Q3UHU8	Gtf2i;Gtf2i;Gtf2i;Gtf2i	Down	S	286	3	___1
Q6PDG5	Smarcc2;Smarcc2	Up	S	302	2	___1
Q924K8	Mta3;Mta3;Mta3;Mta3	Up	S	516	2	___1	Yes	Anti-migratory in breast cancer.
Q3UIR3	Dtx3l	Down	S	3	2	___1	Yes	Pro-migratory.
Q3UIR3	Dtx3l	Down	S	4	2	___1	Yes	Pro-migratory.
Q3UIR3	Dtx3l	Down	S	9	2	___1	Yes	Pro-migratory.
Q3UKG7	Tfeb;Tfeb;Tfeb	Up	S	172	3	___1	Yes	Anti-migratory.
Q3UW53	Fam129a	Up	S	755	3	___1
Q3UZ39	Lrrfip1	Down	S	302	2	___1	Yes	Pro-migratory. Induces metastasis.
Q3V1V3	Esf1	Down	S	156	2	___1
Q501J7-3	Phactr4	Down	S	630	3	___1	Yes	Anti-migratory in hepatocellular carcinoma.
Q52KR3	Prune2	Up	S	1876	3	___1	Yes	Anti-migratory in prostate cancer cells.
Q52KR3	Prune2	Up	S	594	2	___1	Yes	Anti-migratory in prostate cancer cells.
Q52KR3	Prune2	Up	S	696	2	___1	Yes	Anti-migratory in prostate cancer cells.
Q5I012	Slc38a10	Up	S	441	2	___1
Q5I012	Slc38a10	Up	S	887	2	___1
Q5I1X5	Ppp1r13l	Up	S	394	2	___1	Yes	Pro-migratory.
Q5SF07	Igf2bp2;Igf2bp2	Down	S	164	2	___1	Yes	Pro-migratory.
Q5SSW2	Psme4	Down	S	1121	2	___1
Q61097	Ksr1;Ksr1	Up	S	320	2	___1	Yes	Pro-migratory.
Q5U431	Gpr39	Up	S	390	2	___1
Q60774	Tmem45a;Tmem45a	Up	S	269	2	___1	Yes	Pro-migratory.
Q60778	Nfkbib	Up	S	346	2	___1	Yes	Pro- and anti-migratory in different cancers.
Q60855	Ripk1;Ripk1	Down	S	415	3	___1
Q61127	Nab2;Nab2	Down	S	6	2	___1	Yes	Anti-migratory.
Q61143	Trpc6	Up	S	814	2	___1	Yes	Regulates transendothelial migration during inflammatory response.
Q61235	Sntb2	Down	S	375	2	___1
Q61771	Kif3b	Down	S	681	2	___1	Yes	Pro-migratory.
Q61850	Foxc2	Up	S	218	2	___1	Yes	Enhances endothelial cell migration and adhesion
Q61937	Npm1;Npm1;Npm1;Npm1;Gm5611	Down	S	241	2	___1	Yes	Pro-migratory in different cancers.
Q62312	Tgfbr2	Up	S	573	3	___1	Yes	Anti-migratory.
Q62312	Tgfbr2	Up	S	576	2	___1	Yes	Anti-migratory.
Q62312	Tgfbr2	Up	S	578	3	___1	Yes	Anti-migratory.
Q62313	Tgoln1;Tgoln2	Up	S	230	2	___1
Q62433	Ndrg1	Up	S	330	2	___1	Yes	Anti-migratory. Inhibits EMT and metastasis.
Q64700	Rbl2	Up	S	1106	2	___1
Q64700	Rbl2	Up	S	1108	2	___1
Q67FY2	Bcl9l	Up	S	747	2	___1
Q68FD7	Fnip1	Up	S	686	2	___1
Q6DFV7	Ncoa7	Up	S	214	2	___1
Q6DVA0	Lemd2	Up	S	5	2	___1
Q6P5H2	Nes	Down	S	1837	2	___1	Yes	Pro-migratory and invasive in different cancers.
Q6P5H2	Nes	Down	S	688	2	___1	Yes	Pro-migratory and invasive in different cancers.
Q6P5H2	Nes	Down	S	731	2	___1	Yes	Pro-migratory and invasive in different cancers.
Q6P5H2	Nes	Down	S	169	4	___1	Yes	Pro-migratory and invasive in different cancers.
Q6PAM0	Prkab2;Prkab2;Prkab2	Up	S	38	2	___1	Yes	Anti-migratory.
Q6PCP5-2	MFF	Up	S	147	2	___1
Q6PDI5	Ecm29;AI314180;AI314180	Down	S	825	2	___1
Q6PDI5	Ecm29;AI314180;AI314180	Down	S	828	2	___1
Q6PGA2	Rrad;Rrad	Up	S	25	3	___1	Yes	Pro-migratory.
Q6PGL7	Fam21	Up	S	388	3	___1
Q6R891	Ppp1r9b	Up	S	192	2	___1	Yes	Anti-invasive in glioblastoma.
Q6ZPJ3	Ube2o	Down	S	510	2	___1	Yes	Knockdown reduces directional migration.
Q6ZQ03	Fnbp4	Down	S	439	2	___1
Q78IK2	Usmg5	Down	S	6	2	___1
Q7TMJ8	Pik3ip1	Up	S	55	2	___1	Yes	Anti-migratory.
Q7TPH6	Mycbp2;Mycbp2;Mycbp2;Mycbp2	Up	S	2821	2	___1
Q7TPH6	Mycbp2;Mycbp2;Mycbp2;Mycbp2	Up	S	2823	3	___1
Q7TPW1	Nexn	Up	S	296	2	___1
Q7TSG2	Ctdp1	Down	S	730	2	___1
Q7TSH3	Znf516	Down	S	116	2	___1
Q80TJ7	Phf8	Up	S	843	2	___1	Yes	Pro-migratory.
Q80U72	Scrib;Scrib	Up	S	1265	2	___1	Yes	Regulates PAK during migration.
Q80YR7	Clspn	Up	S	1265	2	___1
Q811P8	Arhgap32	Up	S	952	2	___1
Q811Q9	Pcyt1b	Up	S	315	2	___1
Q8BFX3	Kctd3	Down	S	605	2	___1
Q8BGT6	Micall1	Up	S	626	3	___1	Yes	Depletion impairs spreading, migration and focal adhesion turnover.
Q8BGT6	Micall1	Up	S	628	2	___1	Yes	Depletion impairs spreading, migration and focal adhesion turnover.
Q8BH78	Rtn4;Rtn4;Rtn4	Down	S	109	2	___1	Yes	Anti-migratory.
Q8BJ05	Zc3h14	Down	S	409	2	___1
Q8BK06	Fbxo9	Up	S	11	2	___1
Q8BN58-3	Arhgap28;Arhgap28	Up	S	61	2	___1
Q8BN58-3	Arhgap28;Arhgap28	Up	S	63	2	___1
Q8BN59	Larp6	Up	S	409	2	___1	Yes	Pro-migratory.
Q8BUR4	Dock1	Up	S	1858	2	___1	Yes	Pro-migratory.
Q8C078	Camkk2	Up	S	572	2	___1
Q8C0N2	Agpat9	Down	S	68	2	___1	Yes	Anti-migratory.
Q8C0T5	Sipa1l1	Down	S	208	2	___1	Yes	Pro-migratory.
Q8C0T5	Sipa1l1	Down	S	1544	2	___1	Yes	Pro-migratory.
Q8C0T5	Sipa1l1	Down	S	288	2	___1	Yes	Pro-migratory.
Q8C0T5	Sipa1l1	Down	S	1564	2	___1	Yes	Pro-migratory.
Q8C3W1		Up	S	171	2	___1
Q8C3W1		Up	S	172	2	___1
Q8C3W1		Up	S	278	2	___1
Q8C796	Rcor2	Down	S	213	2	___1
Q8C845	Efhd2;Efhd2	Up	S	74	2	___1	Yes	Pro-migratory. Controls direction of cell movement.
Q8C845	Efhd2;Efhd2	Up	S	76	2	___1	Yes	Pro-migratory. Controls direction of cell movement.
Q8CDB0	Mknk2	Up	S	446	2	___1	Yes	Pro-migratory.
Q8CDJ8	Ston1;Ston1	Up	S	189	2	___1
Q8CFN5	Mef2c	Up	S	222	2	___1	Yes	Pro-migratory.
Q8CG73	Rpgrip1l;Rpgrip1l	Down	S	165	2	___1
Q8CGB6-3	Tenc1	Up	S	102	2	___1	Yes	Anti-migratory.
Q8CGB6-3	Tenc1	Up	S	938	2	___1	Yes	Anti-migratory.
Q8CGF1	Arhgap29;Arhgap29	Up	S	1040	2	___1
Q8CGI1	Fam193a	Up	S	1151	2	___1
Q8CI51	Pdlim5	Up	S	111	3	___1	Yes	Anti-migratory upon AMPK phosphorylation.
Q8CI51	Pdlim5	Up	S	134	2	___1	Yes	Anti-migratory upon AMPK phosphorylation.
Q8CI51	Pdlim5	Up	S	136	2	___1	Yes	Anti-migratory upon AMPK phosphorylation.
Q8CI51	Pdlim5	Up	S	137	2	___1	Yes	Anti-migratory upon AMPK phosphorylation.
Q8CIE6	Copa;Copa	Up	S	402	2	___1
Q8K124	Plekho2	Up	S	395	2	___1
Q8K298	Anln	Up	S	653	2	___1	Yes	Anti-migratory in breast cancer cells.
Q8K298	Anln	Up	S	637	2	___1	Yes
Q8K298	Anln	Up	S	531	2	___1	Yes
Q8K2Z4-2	Ncapd2	Up	S	1323	2	___1
Q8K3H0	Appl1	Up	S	401	2	___1	Yes	Pro- and anti-migratory.
Q8K3H0	Appl1	Up	S	403	3	___1	Yes	Pro- and anti-migratory.
Q8K3I9	Glcci1;Glcci1;Glcci1	Down	S	214	2	___1
Q8K482	Emilin2	Up	S	636	2	___1	Yes	Anti-migratory in breast cancer cells.
Q8K4L2	Svil;Svil;Svil;Svil	Up	S	666	2	___1	Yes	Pro-migratory. Increases invadopodial efficiency.
Q8K4L2	Svil	Down	S	1963	2	___1	Yes	Pro-migratory. Increases invadopodial efficiency.
Q8K4L2	Svil;Svil;Svil;Svil;Svil	Down	S	1031	2	___1	Yes	Pro-migratory. Increases invadopodial efficiency.
Q8R1G6	Pdlim2;Pdlim2	Down	S	134	2	___1	Yes	Pro-migratory. Promotes cell attachment.
Q8R1G6	Pdlim2;Pdlim2	Down	S	124	2	___1	Yes	Pro-migratory. Promotes cell attachment.
Q8R1G6	Pdlim2;Pdlim2	Down	S	199	3	___1	Yes	Pro-migratory. Promotes cell attachment.
Q8R1G6	Pdlim2;Pdlim2	Down	S	204	2	___1	Yes	Pro-migratory. Promotes cell attachment.
Q8R1G6	Pdlim2;Pdlim2	Down	S	205	2	___1	Yes	Pro-migratory. Promotes cell attachment.
Q8R1Q8	Dync1li1	Down	S	516	2	___1	Yes	Pro-migratory.
Q8R2M2	Dnttip2	Down	S	353	2	___1
Q8R310	Tmcc3;Tmcc2;Tmcc2;Tmcc2	Up	S	216	3	___1
Q8R361	Rab11fip5	Up	S	176	2	___1
Q8R550	Sh3kbp1;Sh3kbp1	Up	S	549	2	___1
Q8R550	Sh3kbp1;Sh3kbp1	Up	S	550	2	___1
Q8R550	Sh3kbp1;Sh3kbp1;Sh3kbp1	Up	S	193	2	___1
Q8R5A3	Apbb1ip	Down	S	532	2	___1
Q8R5F7	Ifih1	Down	S	289	2	___1
Q8R5F7	Ifih1	Down	S	302	2	___1
Q8VC70	Rbms2	Up	S	33	2	___1
Q8VDU0	Gpsm2	Up	S	408	3	___1	Yes	Pro-migratory in hepatocellular carcinoma.
Q8VE94	Fam110c	Up	S	347	2	___1	Yes	Pro-migratory. Knockdown reduced integrin-mediated filopodia formation.
Q8VE94	Fam110c	Up	S	350	2	___1	Yes	Pro-migratory. Knockdown reduced integrin-mediated filopodia formation.
Q91V89	Ppp2r5d	Up	S	81	2	___1
Q91V98	Cd248	Up	S	754	2	___1	Yes	Pro-migratory.
Q91VY9	Znf622	Down	S	368	2	___1
Q91WK2	Eif3h	Down	S	183	3	___1
Q91X43	Sh3d19	Up	S	65	2	___1
Q91X84	Crtc3	Up	S	62	2	___1
Q91XC0	Ajuba	Down	S	115	2	___1	Yes	Pro-migratory and invasive.
Q99LX5	Mmtag2	Down	S	232	2	___1
Q99MR1	Gigyf1	Up	S	137	2	___1
Q99P31	Hspbp1	Down	S	349	2	___1
Q99PG2	Ogfr	Down	S	403	2	___1
Q99PL6	Ubxn6	Up	S	36	2	___1
Q9CPN8	Igf2bp3	Down	S	165	2	___1	Yes	Pro-migratory and invasive.
Q9CQR2	Rps21	Up	S	65	2	___1
Q9CQS5	Riok2	Up	S	467	2	___1
Q9CR00	Psmd9	Up	S	128	2	___1
Q9D0I4	Stx17	Up	S	288	2	___1
Q9D1C2	Cby1	Up	S	18	2	___1
Q9D1C2	Cby1	Up	S	20	2	___1
Q9D1J1	Necap2	Up	S	181	2	___1
Q9D1J1	Necap2	Up	S	186	3	___1
Q9D1L0	Chchd2;2410018M08Rik;2410018M08Rik	Up	S	45	3	___1
Q9D281	Fam114a1	Up	S	262	2	___1
Q9D4H4	Amotl1	Up	S	840	2	___1
Q9D706	Rpap3	Up	S	429	2	___1	Yes	Pro-migratory.Regulates endothelial cell migration.
Q9D8S3	Arfgap3	Up	S	241	2	___1	Yes	Pro-migratory in prostate cancer cells.
Q9DBG5	Plin3	Up	S	106	2	___1
Q9DBS5	Klc4	Down	S	566	2	___1
Q9DBV4	Mxra8	Up	S	423	2	___1
Q9EPS3	Glce	Up	S	73	2	___1
Q9EQS9-2	Igdcc4;Igdcc4;Igdcc4	Up	S	1239	2	___1
Q9ERG0	Lima1	Up	S	467	2	___1	Yes	Anti-migratory.
Q9ET54-6	Palld;Palld	Up	S	1129	3	___1	Yes	Pro-migratory and invasive.
Q9JHU9	Isyna1	Down	S	524	2	___1
Q9JJ48	Zc3h8	Down	S	67	2	___1
Q9JJA7	Ccnl2	Up	S	328	2	___1
Q9JK83	Pard6b	Down	S	10	2	___1
Q9JLM8	Dclk1;Dclk1	Up	S	352	2	___1	Yes	Pro-migratory.
Q9JLV1	Bag3	Up	S	404	2	___1	Yes	Pro-migratory in cancer cells.
Q9JM96	Cdc42ep4;Cdc42ep4	Up	S	116	2	___1
Q9QUN9	Dkk3	Up	S	295	3	___1	Yes	Pro-migratory in different cancers.
Q9QY06-2	Myo9b	Down	S	1354	2	___1	Yes	Knockdown increased stress fiber formation and migration.
Q9QYY8	Spast	Up	S	266	2	___1	Yes	Pro-migratory.
Q9R0L6-2	Pcm1	Down	S	1319	2	___1	Yes	Suppression leads to neuronal migration defects.
Q9R0L6-2	Pcm1	Down	S	423	2	___1	Yes	Suppression leads to neuronal migration defects.
Q9R0L6-2	Pcm1	Down	S	425	3	___1	Yes	Suppression leads to neuronal migration defects.
Q9R1Y5	Hic1	Up	S	704	2	___1	Yes	Anti-migratory.
Q9R1Z8	Sorbs3	Up	S	412	2	___1
Q9WTK0	Nupr1	Up	S	58	3	___1	Yes	Pro-migratory in different cancers.
Q9WTP2	Spry4	Down	S	126	3	___1
Q9WTQ5	Akap12	Up	S	767	2	___1	Yes	Anti-migratory and anti-invasive. Regulates adhesion dynamics.
Q9WTQ5	Akap12	Up	S	506	2	___1	Yes	Anti-migratory and anti-invasive. Regulates adhesion dynamics.
Q9WTQ5	Akap12	Up	S	507	2	___1	Yes	Anti-migratory and anti-invasive. Regulates adhesion dynamics.
Q9WV92-2	Epb41l3	Up	S	468	2	___1	Yes	Anti-migratory and anti-invasive in different cancers.
Q9WV92-2	Epb41l3	Up	S	470	2	___1	Yes	Anti-migratory and anti-invasive in different cancers.
Q9WV92-2	Epb41l3	Up	S	486	2	___1	Yes	Anti-migratory and anti-invasive in different cancers.
Q9WV92-2	Epb41l3	Up	S	96	2	___1	Yes	Anti-migratory and anti-invasive in different cancers.
Q9WV92-2	Epb41l3	Up	S	63	3	___1	Yes	Anti-migratory and anti-invasive in different cancers.
Q9WVG7	Osr1	Up	S	142	2	___1	Yes	Promotes glioma migration.
Q9Z0H8-2	Clip2	Down	S	939	2	___1
Q9Z2Q6	SEPT5	Up	S	327	2	___1
B2RXX4	Sbf1;Sbf1	Up	T	1137	2	___1
D3YTT6	Osbpl3;Osbpl3	Down	T	248	2	___1
D3Z5J3	Sorbs1;Sorbs1;Sorbs1;Sorbs1;Sorbs1	Up	T	309	2	___1	Yes	Anti-migratory and anti-invasive.
Q08122-4	Tle3;Tle3;Tle3;Tle3;Tle3;Tle3;Tle3;Tle3	Up	T	338	2	___1
Q08122-4	Tle3;Tle3;Tle3;Tle3;Tle3;Tle3;Tle3;Tle3	Up	T	344	2	___1
E9PUM4	Tln2	Up	T	1843	2	___1	Yes	Pro- and anti-migratory.
E9PVX6	Mki67	Up	T	981	2	___1
E9PYQ1	Tgfb1i1;Tgfb1i1;Tgfb1i1	Up	T	188	2	___1	Yes	Promotes endothelial migration to LPA.
E9Q1K3	Add1;Add1;Add1;Add1;Add1	Up	T	610	2	___1	Yes	Anti-migratory. Negative regulator of invasion and migration in lung cancer
E9Q616	Ahnak	Up	T	5567	2	___1	Yes	Regulates smooth muscle cell migration via Rac activation.
E9Q616	Ahnak	Up	T	4950	2	___1	Yes	Regulates smooth muscle cell migration via Rac activation.
E9QLJ5	Plec;Plec;Plec;Plec;Plec;Plec;Plec;Plec;Plec;Plec;Plec;Plec	Up	T	4037	2	___1	Yes	Pro- and anti-migratory in different cancers.
E9QN63	Asap1;Asap1;Asap1;Asap1;Asap1	Up	T	852	2	___1	Yes	Anti-migratory. Knockdown increases speed of migration and spreading.
E9QN87	Plec;Plec;Plec	Up	T	119	4	___1	Yes	Pro- and anti-migratory in different cancers.
E9QPX0	Apbb2;Apbb2;Apbb2;Apbb2;Apbb2;Apbb2;Apbb2;Apbb2	Up	T	34	2	___1
F8VQ05	Fryl	Down	T	1960	2	___1
O08547	Sec22b;Sec22b	Down	T	140	3	___1
O08709	Prdx6;Prdx6;Prdx6;Prdx6b	Down	T	44	2	___1	Yes	Pro-migratory.
Q8C2Q7	Hnrnph1;Hnrnph1;Hnrnph2	Down	T	107	3	___1
O88572	Lrp6;Lrp6	Up	T	1493	2	___1	Yes	Pro-migratory and invasive in different cancers.
O88689-3	Pcdhgc5;Pcdhga11;Pcdhga9;Pcdhga8;Pcdhga3;Pcdhgc4;Pcdhgc3;Pcdhgb6;Pcdhga12	Up	T	905	2	___1
O88689-3	Pcdhgc5;Pcdhga11;Pcdhga9;Pcdhga8;Pcdhga3;Pcdhgc4;Pcdhgc3;Pcdhgb6;Pcdhga12	Up	T	907	2	___1
P17095-1		Down	T	42	2	___1
P46938	Yap1;Yap1;Yap1;Yap1	Down	T	48	2	___1	Yes	Pro-migratory and invasive in different cancers.
P58252	Eef2	Down	T	57	2	___1	Yes	Pro-migratory.
P62046	Lrch1	Up	T	581	2	___1	Yes	Anti-migratory.
Q03145	Epha2	Down	T	899	2	___1	Yes	Pro-migratory and invasive.
Q0PHV7	Dact3	Up	T	457	3	___1
Q3TLH4	Prrc2c	Up	T	2625	3	___1
Q3TXU5	Dhps;Dhps	Down	T	4	2	___1
Q3UHU8	Gtf2i;Gtf2i;Gtf2i;Gtf2i	Down	T	287	3	___1
Q3UPH7	Arhgef40	Up	T	1072	2	___1
Q62261	Sptbn1	Down	T	2327	2	___1	Yes	Anti-migratory and anti-invasive.
Q64337	Sqstm1;Sqstm1	Down	T	272	2	___1
Q68FD7	Fnip1	Up	T	684	2	___1
Q69ZN7	Myof;Myof	Down	T	1768	2	___1	Yes	Pro-migratory and invasive.
Q6PGA2	Rrad;Rrad	Up	T	26	3	___1	Yes	Pro-migratory.
Q6QI06	Rictor	Down	T	1592	2	___1	Yes	Pro-migratory.
Q7TSH3	Znf516	Down	T	956	2	___1
Q80UG5-3	Sept9;Sept9	Up	T	136	4	___1	Yes	Pro- and anti-migratory.
Q8BFX3	Kctd3	Down	T	604	2	___1
Q8BX02	Kank2	Up	T	14	3	___1	Yes	Anti-migratory.
Q8CI51	Pdlim5	Up	T	110	2	___1	Yes	Anti-migratory upon AMPK phosphorylation.
Q8K0L9	Zbtb20	Up	T	211	2	___1
Q8K1L5	Ppp1r11	Down	T	114	3	___1
Q8K3H0	Appl1	Up	T	399	2	___1	Yes	Pro- and anti-migratory.
Q8K4L2	Svil;Svil;Svil;Svil	Up	T	811	2	___1	Yes	Pro-migratory. Increases invadopodial efficiency.
Q8R1Q8	Dync1li1	Down	T	515	2	___1
Q8VDW0	Ddx39a;Ddx39	Down	T	171	3	___1
Q99P31	Hspbp1	Down	T	351	2	___1
Q9D1J1	Necap2	Up	T	180	3	___1
Q9D219	Bcl9	Up	T	115	2	___1	Yes	Pro-migratory in different cancers.
Q9D5V6	Syap1	Up	T	262	3	___1
Q9JHU9	Isyna1	Down	T	523	2	___1	Yes	Pro- and anti-migratory.
Q9JJ66	Cdc20	Up	T	69	2	___1
Q9JJ66	Cdc20	Up	T	70	2	___1
Q9JKN6	Nova1	Up	T	156	2	___1	Yes	Pro-migratory.
Q9Z0P4	Palm	Up	T	141	2	___1	Yes	Anti-migratory.
Q9Z0P4	Palm	Up	T	145	2	___1	Yes	Anti-migratory.
P11440	Cdk1;Cdk1;Cdk2;Cdk3	Up	Y	15	2	___1
Q8CGB6-3	Tenc1	Up	Y	483	2	___1	Yes	Anti-migratory.
Q8K4J6	Mkl1;Mkl1;Mkl1	Up	S	492	2	___2	Yes	Pro-migratory in different cancers.
D3YZP9	Ccdc6	Up	S	233	2	___2
D3YZP9	Ccdc6	Up	S	237	2	___2
D3Z0X5	Phldb1;Phldb1;Phldb1;Phldb1;Phldb1;Phldb1	Up	S	541	2	___2	Yes	Together with Liprin-a1 promotes cell invasion and migration by stabilizing protrusive activity at cell front.
D3Z0X5	Phldb1;Phldb1;Phldb1;Phldb1;Phldb1;Phldb1	Up	S	553	2	___2	Yes	Together with Liprin-a1 promotes cell invasion and migration by stabilizing protrusive activity at cell front.
E9PYH0	Vcan;Vcan;Vcan	Up	S	2578	3	___2	Yes	Anti-migratory in neural crest cells.
E9PYH0	Vcan;Vcan;Vcan	Up	S	2581	2	___2	Yes	Anti-migratory in neural crest cells.
E9PYH0	Vcan;Vcan;Vcan	Up	S	2582	2	___2	Yes	Anti-migratory in neural crest cells.
E9Q474	Akap13;Akap13;Akap13	Up	S	1910	2	___2
E9Q474	Akap13;Akap13;Akap13	Up	S	1913	2	___2
E9Q616	Ahnak	Up	S	5563	2	___2	Yes	Regulates smooth muscle cell migration via Rac activation.
E9Q616	Ahnak	Up	S	5504	2	___2	Yes	Regulates smooth muscle cell migration via Rac activation.
E9Q616	Ahnak	Up	S	5508	2	___2	Yes	Regulates smooth muscle cell migration via Rac activation.
E9Q616	Ahnak	Up	S	5510	2	___2	Yes	Regulates smooth muscle cell migration via Rac activation.
E9Q616	Ahnak	Up	S	5512	2	___2	Yes	Regulates smooth muscle cell migration via Rac activation.
E9QN92	Steap3;Steap3;Steap3	Up	S	55	2	___2
E9QN92	Steap3;Steap3;Steap3	Up	S	58	2	___2
G3UW90	Trps1;Trps1	Down	S	1081	2	___2	Yes	Anti-migratory. Downregulation stimulates EMT. Pro-migratory in endothelial cells.
G3UW90	Trps1;Trps1	Down	S	1085	2	___2	Yes	Anti-migratory. Downregulation stimulates EMT. Pro-migratory in endothelial cells.
P35486	Pdha1	Up	S	293	2	___2
P35486	Pdha1	Up	S	300	2	___2
P46938	Yap1;Yap1;Yap1;Yap1	Down	S	94	2	___2	Yes	Pro-migratory and invasive in different cancers.
Q6PDG5	Smarcc2;Smarcc2	Up	S	302	2	___2
Q3UKG7	Tfeb;Tfeb;Tfeb	Up	S	172	3	___2	Yes	Anti-migratory.
Q3UKG7	Tfeb;Tfeb;Tfeb	Up	S	180	2	___2	Yes	Anti-migratory.
Q5PPR2	Exoc1;Exoc1;Exoc1	Up	S	455	2	___2
Q5PPR2	Exoc1;Exoc1;Exoc1	Up	S	457	2	___2
Q5SF07	Igf2bp2;Igf2bp2	Down	S	161	3	___2	Yes	Pro-migratory.
Q62261	Sptbn1	Down	S	2164	2	___2	Yes	Anti-migratory and anti-invasive.
Q62261	Sptbn1	Down	S	2168	2	___2	Yes	Anti-migratory and anti-invasive.
Q8R1G6	Pdlim2;Pdlim2	Down	S	134	2	___2	Yes	Pro-migratory. Promotes cell attachment.
Q8R1G6	Pdlim2;Pdlim2	Down	S	199	3	___2	Yes	Pro-migratory. Promotes cell attachment.
Q8R1G6	Pdlim2;Pdlim2	Down	S	204	2	___2	Yes	Pro-migratory. Promotes cell attachment.
Q8R1G6	Pdlim2;Pdlim2	Down	S	205	2	___2	Yes	Pro-migratory. Promotes cell attachment.
Q8R1Q8	Dync1li1	Down	S	510	2	___2
Q8R1Q8	Dync1li1	Down	S	516	2	___2
Q8R5F7	Ifih1	Down	S	289	2	___2
Q8R5F7	Ifih1	Down	S	291	2	___2
Q9JLM8	Dclk1;Dclk1	Up	S	352	2	___2	Yes	Pro-migratory.
Q9JLM8	Dclk1;Dclk1	Up	S	355	2	___2	Yes	Pro-migratory.
Q9JLV1	Bag3	Up	S	274	2	___2	Yes	Pro-migratory in cancer cells.
Q9WV92-2	Epb41l3	Up	S	486	2	___2	Yes	Anti-migratory and anti-invasive in different cancers.
Q8K4J6	Mkl1;Mkl1;Mkl1	Up	T	488	2	___2	Yes	Pro-migratory in different cancers.
E9Q616	Ahnak	Up	T	5567	2	___2	Yes	Regulates smooth muscle cell migration via Rac activation.
E9Q616	Ahnak	Up	T	5502	2	___2	Yes	Regulates smooth muscle cell migration via Rac activation.
E9QM38	Slc12a2;Slc12a2	Up	T	206	2	___2
E9QM38	Slc12a2;Slc12a2	Up	T	211	2	___2
P46938	Yap1;Yap1;Yap1;Yap1	Down	T	104	2	___2	Yes	Pro-migratory and invasive in different cancers.
Q5PPR2	Exoc1;Exoc1;Exoc1	Up	T	456	2	___2
Q8R1G6	Pdlim2;Pdlim2	Down	T	142	2	___2	Yes	Pro-migratory. Promotes cell attachment.
Q9WV92-2	Epb41l3	Up	T	488	2	___2	Yes	Anti-migratory and anti-invasive in different cancers.
Q9WV92-2	Epb41l3	Up	T	495	2	___2	Yes	Anti-migratory and anti-invasive in different cancers.
E9Q616	Ahnak	Up	S	5504	2	___3	Yes	Regulates smooth muscle cell migration via Rac activation.
E9Q616	Ahnak	Up	S	5508	2	___3	Yes	Regulates smooth muscle cell migration via Rac activation.
